# Supplementary material for: Comprehensive characterization of tumor microenvironment in colorectal cancer via molecular analysis
Source: eLife. 2023 Jun 2;12:e86032. doi: 10.7554/eLife.86032 (PMC10238095; doi:10.7554/eLife.86032)
Supplement: Supplementary file 1. — (a) The 61 tumor microenvironment (TME)-related signatures used to comprehensively characterize CRC. (b) Overlapping genes between 61 TME-related signatures. (c) The datasets used to identify and validate of CCCRC classification. (d) Univariate cox analysis and Kaplan–Meier method showing the ability of the 61 TME-related signatures to predict disease-free survival and overall survival in the CRC-AFFY cohort. (e) Difference analysis of metabolism signature scores between the four CCCRC subtypes in the CRC-AFFY cohort. (f) The information of clinicopathological characteristics and CCCRC subtypes in the CRC-AFFY and CRC-RNAseq cohorts. (g) Associations between clinicopathological characteristics and CCCRC subtypes. (h) Multivariate Cox proportional hazard regression analysis for disease-free survival and overall survival adjusting for the CCCRC subtypes and clinicopathological characteristics in the combined cohort (the CRC-AFFY and CRC-RNAseq cohorts). (1) A total of 254 hematoxylin and eosin (HE)-stained whole-slide images used to evaluate histological characteristics of CCCRC subtypes. [file elife-86032-supp1.xlsx]

## Sheet: Supplementary file 1a
Signature	Source	Category	Genes
B_cells	PMID: 30594216	Lymphoids	BLK	CD19	CD22	CD79A	CD79B	CR2	FCRL5	MS4A1	PAX5	STAP1	TNFRSF13B	TNFRSF13C	TNFRSF17
Effector_cells	PMID: 34019806	Lymphoids	CD8A	CD8B	EOMES	FASLG	GNLY	GZMA	GZMB	GZMK	IFNG	PRF1	TBX21	ZAP70
NK_cells	PMID: 34019806	Lymphoids	CD160	CD226	CD244	EOMES	FGFBP2	GNLY	GZMB	GZMH	IFNG	KIR2DL4	KLRC2	KLRF1	KLRK1	NCR1	NCR3	NKG7	SH2D1B
T_cells	PMID: 34019806	Lymphoids	CD28	CD3D	CD3E	CD3G	CD5	ITK	TBX21	TRAC	TRAT1	TRBC1	TRBC2
Tfh	PMID: 30594216	Lymphoids	PDCD1	CXCL13	CXCR5
Th1_cells	PMID: 30594216	Lymphoids	CD40LG	IFNG	IL12RB2	IL2	IL21	STAT4	TBX21
Th17	PMID: 25853550	Lymphoids	ABP1	B4GALNT4	C2CD4A	C2CD4B	CA2	CCDC65	CEACAM3	CHRM3	DOC2B	F12	FURIN	GPR25	IL17A	IL17C	IL17F	IL17RC	IL17RE	IL23A	ILDR1	LONRF3	LTK	MOCOS	SH2D6	TNIP2	TRAF3IP2	YBX2
Th2_cells	PMID: 30594216	Lymphoids	CCR4	IL10	IL13	IL4	IL5
Treg	PMID: 34019806	Lymphoids	CCR8	CTLA4	FOXP3	IKZF2	IKZF4	IL10	TNFRSF18
Amino_acid	PMID: 29617665	metabolism	NDUFAB1	SLC25A13	PSMB1	AASS	RPS20	IYD	SLC6A7	PSMC4	CHDH	CPS1	SARS1	OTC	RPL26L1	MRI1	PSMA4	ALDH18A1	BCAT1	RPL18	OAT	KARS1	PSME4	SLC44A1	ASNS	RPL31	HSD17B10	ACAT1	TYR	NAALAD2	MCCC1	DCT	ARG2	BCKDHB	RPS5	HAL	FOLH1	PSMC5	SMOX	RPL6	RPLP0	DLD	PSME1	PHGDH	PSMD5	PSMD8	MTAP	PRODH	GCAT
Carbohydrate	PMID: 29617665	metabolism	HS3ST1	SLC25A13	ST3GAL1	IDS	DCN	MAN2B2	MDH1	XYLT2	DERA	CD44	B4GALT7	NUP160	CHPF2	VCAN	PHKA2	TPR	HEXB	GYG2	NDC1	GPC1	ST3GAL6	PFKP	PHKA1	PKM	HYAL2	PYGM	NUP133	NDST1	PRKACA	HMMR	ENO1	NUP37	GPC4	PGM1	GCKR	SEH1L	AKR1B1	B4GALT1	SLC9A1	NUP50	XYLB	AAAS	NUP188	SLC25A1	PYGL	PCK2	PYGB
Energy	PMID: 29617665	metabolism	PRKAR2B	ABCC8	ADIPOR2	CACNA2D2	MLXIPL	GNA15	ACSL4	GNB5	PRKACA	ACACB	ADCY2	GNB1	RAPGEF3	GNAS	GNA11	RAPGEF4	ITPR3	PPP2CB	PPP2R1A	STX1A	PRKAG2	MLX	PRKAR1A	GNB3	GLP1R	PPP2R5D	PPP2CA	PRKAR2A	GNAI2	GNB4	GCG	RAP1A	SLC2A1	STK11	ADCY7	ITPR2	ACSL3	FFAR1	GNG13	GNG11	GNGT1	GNAI1	ADCY4	SYT5	ACLY	PRKAB2	SNAP25
Lipid	PMID: 29617665	metabolism	NFYA	CYP51A1	MTMR7	NDUFAB1	ACSM3	CREBBP	TSPOAP1	PON1	CROT	ABCB4	GDE1	OSBPL7	AGK	ALDH3B1	ARSD	PNPLA4	MED24	STARD3NL	ABHD5	PIK3C2A	MBTPS2	NR1H4	ELOVL5	ALOX5	DPEP1	AGPS	CYP24A1	OSBPL5	ALAS1	NR1H3	AGPAT4	PNPLA6	CYP46A1	PI4K2B	INPP4A	MED17	HEXB	PIK3CB	PLEKHA5	MSMO1	THRAP3	GALC	TBXAS1	ACAA1	ARSF	DGAT2	SPHK2
Nucleotide	PMID: 29617665	metabolism	AK2	UPP2	TYMP	ADSS2	CTPS2	RRM2B	ENTPD2	NT5C2	CAD	AK6	UPB1	GMPR2	SAMHD1	DHODH	NME3	NME4	GSR	NUDT1	IMPDH1	AK1	LHPP	DNPH1	AGXT2	UMPS	DGUOK	AMPD2	AMPD1	NT5C1A	GDA	NT5C3A	NT5C	ITPA	PAICS	PPAT	DUT	DCTD	PUDP	UCK1	AMPD3	NT5E	NUDT15	TXN	GMPR	ENTPD1	ATIC	AK7	UCK2
TCA_cycle	PMID: 29617665	metabolism	NDUFAF7	NDUFAB1	PDK4	PDK2	UQCRC1	NDUFS1	MPC1	CS	HAGH	NDUFB4	ME1	IDH3G	PDK3	SDHA	ME2	L2HGDH	NDUFB2	PDPR	DLD	FH	ATP5F1D	NDUFB7	SLC16A8	ACO2	GSTZ1	NDUFAF5	IDH3B	SLC25A14	ETFB	OGDH	COA1	NDUFC1	UCP1	PDHX	NDUFS8	ATP5F1B	LDHB	COX6A1	PPARD	NNT	TIMMDC1	NDUFS7	COQ10B	COX7A2L	ATP5PB	SDHB	NDUFB3
Vitamin_cofactor	PMID: 29617665	metabolism	CD38	NADK	PRSS3	RETSAT	SLC2A3	GPC1	GSTO2	MTHFD2	COASY	RDH11	PTGS2	MOCOS	SLC46A1	ACACB	GPC4	NMRK2	MCCC1	HSP90AA1	LRP2	APOB	COQ9	SLC23A2	CYB5R3	MTHFD1	SLC52A3	ACP5	PARP4	ABCC1	QPRT	NAMPT	NMRK1	CUBN	PNPO	BST1	APOA4	APOC3	COQ5	VNN1	VNN2	NUDT12	PCCB	RBP2	RBP1	SDC1	SPR	MTR	SLC2A1
aDCs	PMID: 30594216	Myeloid	CD83	LAMP3	CCL1
DCs	PMID: 30594216	Myeloid	CCL17	CCL22	CD209	CCL13
iDCs	PMID: 30594216	Myeloid	CD1A	CD1E
M1_macrophages	PMID: 34019806	Myeloid	CMKLR1	IL12A	IL12B	IL1B	IL23A	IRF5	NOS2	SOCS3	TNF
M2_macrophages	PMID: 34019806	Myeloid	CD163	CD68	CSF1R	IL10	IL4I1	MRC1	MSR1	SIGLEC1
Mast_cells	PMID: 30594216	Myeloid	CMA1	MS4A2	TPSAB1
MDSCs	PMID: 34019806	Myeloid	ARG1	CYBB	IDO1	IL10	IL4I1	IL6	PTGS2
Neutrophils	PMID: 34019806	Myeloid	CD177	CTSG	CXCR1	CXCR2	ELANE	FCGR3B	FFAR2	MPO	PGLYRP1	PRTN3
pDCs	PMID: 30594216	Myeloid	CLEC4C	CXCR3	GZMB	IL3RA	IRF7	IRF8	LILRA4	PHEX	PLD4	PTCRA
Antitumor_cytokines	PMID: 34019806	Other_immune_related_signature	TNF	IFNB1	IFNA2	CCL3	TNFSF10	IL21
APC_co_inhibition	PMID: 30594216	Other_immune_related_signature	C10orf54	CD274	LGALS9	PDCD1LG2	PVRL3
APC_co_stimulation	PMID: 30594216	Other_immune_related_signature	CD40	CD58	CD70	ICOSLG	SLAMF1	TNFSF14	TNFSF15	TNFSF18	TNFSF4	TNFSF8	TNFSF9
Checkpoint_molecules	PMID: 30594216	Other_immune_related_signature	BTLA	CD274	CTLA4	HAVCR2	LAG3	PDCD1	PDCD1LG2	TIGIT	VSIR
chemokine	PMID: 28052254	Other_immune_related_signature	CCL1	CCL2	CCL3	CCL4	CCL5	CCL7	CCL8	CCL11	CCL13	CCL14	CCL15	CCL16	CCL17	CCL18	CCL19	CCL20	CCL21	CCL22	CCL23	CCL24	CCL25	CCL26	CCL27	CCL28	CX3CL1	CXCL1	CXCL2	CXCL3	CXCL5	CXCL6	CXCL8	CXCL9	CXCL10	CXCL11	CXCL12	CXCL13	CXCL14	CXCL16	CXCL17	XCL1	XCL2
chemokine_receptor	PMID: 28052254	Other_immune_related_signature	CCR1	CCR2	CCR3	CCR4	CCR5	CCR6	CCR7	CCR8	CCR9	CCR10	CXCR1	CXCR2	CXCR3	CXCR4	CXCR5	CXCR6	XCR1	CX3CR1
Cytolytic_activity	PMID: 30594216	Other_immune_related_signature	PRF1	GZMA
Immunostimulator	PMID: 28052254	Other_immune_related_signature	C10orf54	CD27	CD276	CD28	CD40	CD40LG	CD48	CD70	CD80	CD86	CXCL12	CXCR4	ENTPD1	HHLA2	ICOS	ICOSLG	IL2RA	IL6	IL6R	KLRC1	KLRK1	LTA	MICB	NT5E	PVR	RAET1E	TMEM173	TMIGD2	TNFRSF13B	TNFRSF13C	TNFRSF14	TNFRSF17	TNFRSF18	TNFRSF25	TNFRSF4	TNFRSF8	TNFRSF9	TNFSF13	TNFSF13B	TNFSF14	TNFSF15	TNFSF18	TNFSF4	TNFSF9	ULBP1
MHCI	PMID: 30594216	Other_immune_related_signature	B2M	HLA-A	HLA-B	HLA-C	NLRC5	TAP1	TAP2	TAPBP
MHCII	PMID: 30594216	Other_immune_related_signature	CIITA	HLA-DMA	HLA-DMB	HLA-DPA1	HLA-DPB1	HLA-DQA1	HLA-DQB1	HLA-DRA	HLA-DRB1
Protumor_cytokines	PMID: 34019806	Other_immune_related_signature	IL10	TGFB1	TGFB2	TGFB3	IL22	MIF	IL6
T_cell_co_inhibition	PMID: 30594216	Other_immune_related_signature	BTLA	C10orf54	CD160	CD244	CD274	CTLA4	HAVCR2	LAG3	LAIR1	TIGIT
T_cell_co_stimulation	PMID: 30594216	Other_immune_related_signature	CD2	CD226	CD27	CD28	CD40LG	ICOS	SLAMF1	TNFRSF18	TNFRSF25	TNFRSF4	TNFRSF8	TNFRSF9	TNFSF14
Type_I_IFN_Reponse	PMID: 30594216	Other_immune_related_signature	DDX4	IFIT1	IFIT2	IFIT3	IRF7	ISG20	MX1	MX2	RSAD2	TNFSF10
Type_II_IFN_Reponse	PMID: 30594216	Other_immune_related_signature	GPR146	SELP	AHR
Endothelium	PMID: 23584090	Stromal_signature	BASP1	BMP4	CITED1	CTNNB1	FZD7	GATA3	GDNF	GREM1	LIF	PAX2	PAX8	PELO	SALL1	SIX2	SMO	STAT1	TCF15	WNT4	WNT9B	WT1
Extracellular_matrix	REACTOME_EXTRACELLULAR_MATRIX_ORGANIZATION	Stromal_signature	A2M	ACAN	ACTN1	ADAM10	ADAM12	ADAM15	ADAM17	ADAM19	ADAM8	ADAM9	ADAMTS1	ADAMTS14	ADAMTS16	ADAMTS18	ADAMTS2	ADAMTS3	ADAMTS4	ADAMTS5	ADAMTS8	ADAMTS9	AGRN	APP	ASPN	BCAN	BGN	BMP1	BMP10	BMP2	BMP4	BMP7	BSG	CAPN1	CAPN10	CAPN11	CAPN12	CAPN13	CAPN14	CAPN15	CAPN2	CAPN3	CAPN5	CAPN6	CAPN7	CAPN8	CAPN9	CAPNS1	CAPNS2
interactions_of_cell_and_extracellular_matrix	REACTOME_CELL_EXTRACELLULAR_MATRIX_INTERACTIONS	Stromal_signature	ACTB	ACTG1	ACTN1	ARHGEF6	FBLIM1	FERMT2	FLNA	FLNC	ILK	ITGB1	LIMS1	LIMS2	PARVA	PARVB	PXN	RSU1	TESK1	VASP
Matrix_remodeling	REACTOME_DEGRADATION_OF_THE_EXTRACELLULAR_MATRIX	Stromal_signature	A2M	ACAN	ADAM10	ADAM15	ADAM17	ADAM8	ADAM9	ADAMTS1	ADAMTS16	ADAMTS18	ADAMTS4	ADAMTS5	ADAMTS8	ADAMTS9	BCAN	BMP1	BSG	CAPN1	CAPN10	CAPN11	CAPN12	CAPN13	CAPN14	CAPN15	CAPN2	CAPN3	CAPN5	CAPN6	CAPN7	CAPN8	CAPN9	CAPNS1	CAPNS2	CASP3	CAST	CD44	CDH1	CMA1	COL10A1	COL11A1	COL11A2	COL12A1	COL13A1	COL14A1	COL15A1	COL16A1	COL17A1
mesenchymal_cell	PMID: 23584090	Stromal_signature	ACVR1	ADAM15	ADIPOR1	AKNA	ALDH1A2	ALX1	AMELX	AMER1	ANXA6	AXIN2	BAMBI	BCL2	BCL9L	BMP2	BMP4	BMP5	BMP7	BMPR1A	CDH2	CLASP1	CLASP2	COL1A1	CORO1C	CRB2	CTNNB1	CUL7	CYP26C1	DAB2	DAB2IP	DACT3	DAG1	DDX17	DDX5	DLG5	EDN1	EDN3	EDNRA	EDNRB	EFNA1	EFNB1	ELL3	ENG	EOMES	EPB41L5	EPHA3	ERBB4	EXT1
mesenchymal_stem_cell	GO:0072497	Stromal_signature	CTNNB1	FZD1	GSK3B	LTBP3	MIR346	PDGFRA	REST	SLC4A11	SOX5	SOX6	SOX9	WNT3
Angiogenesis	PMID: 30329142	Tumor_features	ACVRL1	JAG1	ANGPT1	ANGPT2	CD34	CDC42	MAPK14	TYMP	EDN1	EFNB2	EGR3	EPHB4	PTK2B	FGF2	FGFR1	VEGFD	FOXC2	FLT1	FLT4	FN1	GPLD1	NR4A1	ID1	ITGA5	ITGAV	ITGB1	KDR	LOXL2	MMP14	NOTCH1	PDGFA	PDGFRB	PGF	PIK3CA	PTGS2	PTK2	ROBO1	SHC1	SRF	TAL1	TDGF1	TEK	VAV2	VEGFA	VEGFC	FGF18	NRP1
apoptosis	PMID: 30329142	Tumor_features	APAF1	ATF4	ATM	BAK1	BID	BOK	BRCA2	CASP2	CASP4	CASP9	DAPK3	DDIT3	E2F2	EP300	GSN	IFI16	INHBA	KRT8	LGALS9	NFATC4	P2RX7	PMAIP1	POLB	PPP2R1B	PPP2R5C	SORT1	SKIL	STK3	STK4	TIMP3	TNFRSF1A	TNFRSF1B	TP53BP2	DYRK2	CRADD	BCL10	AIFM1	BCL2L11	DNM1L	BCAP31	SIVA1	MLLT11	RIPK3	SNW1	PPP1R13B	PHLDA3	NUPR1
cell_cycle	PMID: 30329142	Tumor_features	ANLN	ANP32E	ATAD2	AURKA	BRIP1	CASP8AP2	CBX5	CCNA2	CCNB2	CCND1	CCNE1	CCNE2	CDC25C	CDC45	CDC6	CDCA2	CDCA3	CDCA8	CENPA	CENPE	CHAF1B	CKAP2L	CKAP5	CKS1B	CKS2	CLSPN	DHFR	DLGAP5	DSCC1	DTL	ECT2	EXO1	FEN1	GAS2L3	GINS2	GTSE1	HELLS	HJURP	HMMR	KIF11	KIF23	KIF2C	LBR	MCM4	MCM5	MCM6	MKI67
differentiation	PMID: 30329142	Tumor_features	ABL1	ACVR1	ADA	AGT	AKT1	ANXA1	ATOH1	ATP2B2	ATP7A	AXL	BCL2	BCL3	PRDM1	BMP2	BMP6	BRAF	CASP8	CAV3	RUNX2	RUNX1	CCNB1	CD86	CDK1	CDC42	CDH2	CEBPA	CEBPB	CREB1	MAPK14	CSF1	CSF1R	CSF2	DRD1	EDN3	EDNRB	EPHA2	EMX1	EP300	ERBB4	ERCC2	FGF8	FGFR1	FGFR2	FOXC2	FLT3LG	MTOR	GATA1
DNA_damage	PMID: 30329142	Tumor_features	BRCA1	MRE11	FOXN3	HIPK2	SP100	PSME4	RPS6KA6	TP63	GTSE1	PPP2R5C	TP73	CNOT4	DNAJA1	BAX	UIMC1	AURKA	CNOT3	PCBP4	TFAP4	E2F1	RGCC	RBL2	NBN	GML	BABAM1	CASP2	CDK5RAP3	CCND1	FOXM1	CDKN1B	CNOT2	ING4	CNOT6	TFDP2	NEK11	PSMD14	ARID3A	MAD2L2	GADD45A	SYF2	RPA2	PLAGL1	RBBP6	CDK2	CDKN1A	SOX4	CNOT1
DNA_repair	PMID: 30329142	Tumor_features	RAD52	POLR2J	LIG3	REV3L	BRCA1	ERCC1	MNAT1	MRE11	RFC1	TDP1	RRM2B	ERCC8	RFC2	POLD1	NTHL1	TP53BP1	POLB	XRCC1	XAB2	POLD3	XRCC5	RIF1	PALB2	SIRT1	POLR2E	POLR2F	POLE2	APEX1	POLI	POLA1	POLR2C	MPG	NBN	ERCC2	POLR2I	LIG1	RPA3	POLD2	RAD51C	GTF2H1	RAD51AP1	GTF2H3	RFC5	FANCE	RAD50	OGG1	FANCL
EMT	PMID: 21251323	Tumor_features	ZEB1	ZEB2	TCF4	AXL	CDH1	CDH3	VIM	CDH2	CDH4
hypoxia	PMID: 30329142	Tumor_features	PLIN2	ADM	ADORA2B	AK4	ALDOC	ANG	ATF3	BNIP3	BNIP3L	CA9	CA12	CAV1	CCNG2	KLF6	DUSP1	EFNA1	ENO2	F3	FOS	NR3C1	GYS1	HIF1A	HK1	HK2	HMOX1	IGFBP3	IL6	JUN	LDHA	LOX	MIF	MXI1	NFIL3	P4HA1	SERPINE1	PAM	PDGFB	PDK1	PFKFB3	PFKFB4	PFKP	PGF	PGK1	PGM1	PLAUR	PLOD2	PPP1R3C
Inflammation	PMID: 30329142	Tumor_features	BMP2	CD6	CEBPB	CCR7	CSF1	F3	F12	FCER1G	B4GALT1	FFAR2	CXCL1	CXCL2	CXCL3	ICAM1	IL1A	IL1B	IL6	CXCL8	IL12B	TNFRSF9	IL18	CXCL10	IRAK2	KLKB1	NFKB1	NFKB2	OLR1	OSM	SERPINE1	MAP2K3	PTGS2	PTX3	REL	RELA	RELB	S100A8	CCL2	CCL3	CCL4	CCL5	CCL7	CCL8	CCL18	CCL20	CCL23	CXCL6	CXCL11
invasion	PMID: 30329142	Tumor_features	AEBP1	AKR1B1	AMD1	SLC25A5	ATP5PB	BAG1	BGN	C1QB	CALD1	CAPG	CCNE1	CDH11	CKS1B	CKS2	COL1A1	COL1A2	COL3A1	COL5A1	COL5A2	COL6A2	COL6A3	COL10A1	COL11A1	COMP	CSE1L	VCAN	CTSK	DAB2	DDX5	EDNRA	FAP	FBN1	FN1	GNAS	H2AFZ	HMGB2	HNRNPU	HSD17B4	CYR61	INHBA	LAMB1	LAMC1	LGALS1	LOX	LOXL2	LUM	MMP2
metastasis	PMID: 30329142	Tumor_features	ACKR3	AFP	AGR2	AKT1	ALDH1A1	ANGPTL4	ANXA1	ANXA2	AQP5	ATF3	AURKA	AXL	B2M	BMI1	BMP2	BRAF	BSG	CA9	CCDC88A	CCND1	CCR7	CD24	CD274	CD44	CDCP1	CDH17	CDH2	CEACAM1	CEACAM5	CLIC1	CRP	CTGF	CTNND1	CTSB	CTSK	CTSL	CTTN	CXCL12	CXCL2	CXCL8	CXCR2	CYR61	DDR2	EGF	EGFR	EGR1	EPAS1
proliferation	PMID: 30329142	Tumor_features	AURKA	AURKB	BUB1	CCNB1	CCND1	CCNE1	CDK2	CETN3	E2F1	ESCO2	MCM2	MCM6	MKI67	MYBL2	PLK1
quiescence	PMID: 30329142	Tumor_features	ALOX5	ANXA5	AREG	CREM	CRHBP	EMP1	EVI2A	GBP2	CXCL1	CXCL2	CXCL3	GUCY1A1	H1F0	HBB	HLX	IL1B	CXCL8	INHBA	CXCL10	JUN	TM4SF1	MLLT3	NR4A2	SERPINB2	PCDH9	PMCH	PTGS2	PTPRC	RGS1	RHAG	TSPAN31	CCL8	CCL19	CCL20	CXCL6	CXCL11	CXCL5	TRA2B	SPTBN1	SVIL	TCF7L2	TFPI	TGFB1I1	TPBG	TNFSF4	FXR1	NRIP1
stemness	PMID: 30329142	Tumor_features	AFMID	AFP	ANPEP	APC	AQP1	ASCL1	ASCL2	AXIN2	AZGP1	BAZ2B	BMI1	BOC	C6orf62	CA2	CAMK2N1	CCL5	CCND2	CD200	CD24	CD33	CD38	CD44	CDCA7	CDK6	CEBPA	CFTR	CHD7	CORO1C	CXCL2	DBX1	DBX2	DNMT3A	DPP4	EBF1	EEF1A1	EGFR	EIF4B	EMX1	EMX2	ENG	EPHB2	ETS2	ETV1	EVI2A	EZH2	FABP7	FAM84A
Cancer_stem_cells	PMID: 21419747	Tumor_features	ARL4C	ASCL2	ASRGL1	BCL2	BEX1	BEX4	C13ORF15	CBS	CD44	CENPF	CHST11	CYP11A1	CYP2E1	DCLK1	E330027M22RIK	EPHB3	ESAM	FAM49A	FSTL1	FZD2	HEBP2	IGFBP4	KIF26B	KLHL8	LFNG	LGR5	LIMCH1	MARVELD1	MEX3A	MPP3	NAV1	PCDH8	PHGDH	PRICKLE1	PSRC1	PTHLH	PTPRO	PVT1	PXDN	RASSF5	SCN2B	SLC14A1	SLC1A2	SLCO3A1	SOAT1	SORCS2	ST3GAL3
[truncated: 693 more columns]

## Sheet: Supplementary file 1b
	T cells	NK cells	Effector cells	B cells	Th1 cells	Th2 cells	Th17 cells	Treg cells	Tfh cells	M1 macrophages	M2 macrophages	DCs	aDCs	iDCs	pDCs	MDSCs	Neutrophils	Mast cells	T cell co inhibition	T cell co stimulation	Cancer Stem Cells	Mesenchymal stem cell	Mesenchymal cell	Endothelium	EMT	ECM	Matrix remodeling	Cell and ECM interactions	Cytolytic activity	Checkpoint molecules	Immunostimulator	Antitumor cytokines	Protumor cytokines	Chemokine	Chemokine receptor	MHCI	MHCII	APC co inhibition	APC co stimulation	Type I IFN Reponse	Type II IFN Reponse	Invasion	Metastasis	Proliferation	Differentiation	Hypoxia	Quiescence	Stemness	Apoptosis
T cells	11	0	1	0	1	0	0	0	0	0	0	0	0	0	0	0	0	0	0	1	0	0	0	0	0	0	0	0	0	0	1	0	0	0	0	0	0	0	0	0	0	0	0	0	0	0	0	0	0
NK cells	0	17	4	0	1	0	0	0	0	0	0	0	0	0	1	0	0	0	2	1	0	0	1	0	0	0	0	0	0	0	1	0	0	0	0	0	0	0	0	0	0	0	0	0	1	0	0	0	0
Effector cells	1	4	12	0	2	0	0	0	0	0	0	0	0	0	1	0	0	0	0	0	0	0	1	0	0	0	0	0	2	0	0	0	0	0	0	0	0	0	0	0	0	0	0	0	2	0	0	0	0
B cells	0	0	0	13	0	0	0	0	0	0	0	0	0	0	0	0	0	0	0	0	0	0	0	0	0	0	0	0	0	0	3	0	0	0	0	0	0	0	0	0	0	0	0	0	0	0	0	0	0
Th1 cells	1	1	2	0	7	0	0	0	0	0	0	0	0	0	0	0	0	0	0	1	0	0	0	0	0	0	0	0	0	0	1	1	0	0	0	0	0	0	0	0	0	0	0	0	1	0	0	0	0
Th2 cells	0	0	0	0	0	5	0	1	0	0	1	0	0	0	0	1	0	0	0	0	0	0	0	0	0	0	0	0	0	0	0	0	1	0	1	0	0	0	0	0	0	0	0	0	0	0	0	0	0
Th17 cells	0	0	0	0	0	0	26	0	0	1	0	0	0	0	0	0	0	0	0	0	0	0	0	0	0	1	1	0	0	0	0	0	0	0	0	0	0	0	0	0	0	0	0	0	1	0	0	1	0
Treg cells	0	0	0	0	0	1	0	7	0	0	1	0	0	0	0	1	0	0	1	1	0	0	0	0	0	0	0	0	0	1	1	0	1	0	1	0	0	0	0	0	0	0	0	0	0	0	0	0	0
Tfh cells	0	0	0	0	0	0	0	0	3	0	0	0	0	0	0	0	0	0	0	0	0	0	0	0	0	0	0	0	0	1	0	0	0	1	1	0	0	0	0	0	0	0	0	0	0	0	1	0	0
M1 macrophages	0	0	0	0	0	0	1	0	0	9	0	0	0	0	0	0	0	0	0	0	0	0	1	0	0	0	0	0	0	0	0	1	0	0	0	0	0	0	0	0	0	0	0	0	2	0	1	0	0
M2 macrophages	0	0	0	0	0	1	0	1	0	0	8	0	0	0	0	2	0	0	0	0	0	0	0	0	0	0	0	0	0	0	0	0	1	0	0	0	0	0	0	0	0	0	0	0	1	0	0	0	0
DCs	0	0	0	0	0	0	0	0	0	0	0	4	0	0	0	0	0	0	0	0	0	0	0	0	0	0	0	0	0	0	0	0	0	3	0	0	0	0	0	0	0	0	0	0	0	0	0	0	0
aDCs	0	0	0	0	0	0	0	0	0	0	0	0	3	0	0	0	0	0	0	0	0	0	0	0	0	0	0	0	0	0	0	0	0	1	0	0	0	0	0	0	0	0	0	0	0	0	0	0	0
iDCs	0	0	0	0	0	0	0	0	0	0	0	0	0	2	0	0	0	0	0	0	0	0	0	0	0	0	0	0	0	0	0	0	0	0	0	0	0	0	0	0	0	0	0	0	0	0	0	0	0
pDCs	0	1	1	0	0	0	0	0	0	0	0	0	0	0	10	0	0	0	0	0	0	0	0	0	0	0	0	0	0	0	0	0	0	0	1	0	0	0	0	1	0	0	0	0	0	0	0	0	0
MDSCs	0	0	0	0	0	1	0	1	0	0	2	0	0	0	0	7	0	0	0	0	0	0	1	0	0	0	0	0	0	0	1	0	2	0	0	0	0	0	0	0	0	0	3	0	0	1	1	0	0
Neutrophils	0	0	0	0	0	0	0	0	0	0	0	0	0	0	0	0	10	0	0	0	0	0	0	0	0	2	2	0	0	0	0	0	0	0	2	0	0	0	0	0	0	0	1	0	0	0	0	0	0
Mast cells	0	0	0	0	0	0	0	0	0	0	0	0	0	0	0	0	0	3	0	0	0	0	0	0	0	2	2	0	0	0	0	0	0	0	0	0	0	0	0	0	0	0	0	0	0	0	0	0	0
T cell co inhibition	0	2	0	0	0	0	0	1	0	0	0	0	0	0	0	0	0	0	10	0	0	0	0	0	0	0	0	0	0	6	1	0	0	0	0	0	0	2	0	0	0	0	1	0	0	0	0	0	0
T cell co stimulation	1	1	0	0	1	0	0	1	0	0	0	0	0	0	0	0	0	0	0	13	0	0	0	0	0	0	0	0	0	0	10	0	0	0	0	0	0	0	2	0	0	0	0	0	0	0	0	0	0
Cancer Stem Cells	0	0	0	0	0	0	0	0	0	0	0	0	0	0	0	0	0	0	0	0	52	0	1	0	0	2	1	0	0	0	0	0	0	0	0	0	0	0	0	0	0	0	2	0	1	0	0	4	0
Mesenchymal stem cell	0	0	0	0	0	0	0	0	0	0	0	0	0	0	0	0	0	0	0	0	0	12	3	1	0	1	0	0	0	0	0	0	0	0	0	0	0	0	0	0	0	0	1	0	1	0	0	1	0
Mesenchymal cell	0	1	1	0	0	0	0	0	0	1	0	0	0	0	0	1	0	0	0	0	1	3	231	10	1	13	4	2	0	0	1	0	4	0	0	0	0	0	0	0	0	10	18	0	39	3	3	10	1
Endothelium	0	0	0	0	0	0	0	0	0	0	0	0	0	0	0	0	0	0	0	0	0	1	10	20	0	1	0	0	0	0	0	0	0	0	0	0	0	0	0	0	0	1	0	0	4	0	0	1	0
EMT	0	0	0	0	0	0	0	0	0	0	0	0	0	0	0	0	0	0	0	0	0	0	1	0	9	1	1	0	0	0	0	0	0	0	0	0	0	0	0	0	0	0	5	0	3	0	0	1	0
ECM	0	0	0	0	0	0	1	0	0	0	0	0	0	0	0	0	2	2	0	0	2	1	13	1	1	301	140	2	0	0	0	0	3	0	0	0	0	0	0	0	0	26	31	0	6	6	0	7	0
Matrix remodeling	0	0	0	0	0	0	1	0	0	0	0	0	0	0	0	0	2	2	0	0	1	0	4	0	1	140	140	0	0	0	0	0	0	0	0	0	0	0	0	0	0	16	17	0	2	0	0	1	0
Cell and ECM interactions	0	0	0	0	0	0	0	0	0	0	0	0	0	0	0	0	0	0	0	0	0	0	2	0	0	2	0	18	0	0	0	0	0	0	0	0	0	0	0	0	0	0	2	0	1	0	0	1	0
Cytolytic activity	0	0	2	0	0	0	0	0	0	0	0	0	0	0	0	0	0	0	0	0	0	0	0	0	0	0	0	0	2	0	0	0	0	0	0	0	0	0	0	0	0	0	0	0	0	0	0	0	0
Checkpoint molecules	0	0	0	0	0	0	0	1	1	0	0	0	0	0	0	0	0	0	6	0	0	0	0	0	0	0	0	0	0	9	0	0	0	0	0	0	0	2	0	0	0	0	1	0	0	0	0	0	0
Immunostimulator	1	1	0	3	1	0	0	1	0	0	0	0	0	0	0	1	0	0	1	10	0	0	1	0	0	0	0	0	0	0	45	0	1	1	1	0	0	1	8	0	0	0	2	0	2	2	1	1	0
Antitumor cytokines	0	0	0	0	1	0	0	0	0	1	0	0	0	0	0	0	0	0	0	0	0	0	0	0	0	0	0	0	0	0	0	6	0	1	0	0	0	0	0	1	0	0	0	0	0	0	1	0	0
Protumor cytokines	0	0	0	0	0	1	0	1	0	0	1	0	0	0	0	2	0	0	0	0	0	0	4	0	0	3	0	0	0	0	1	0	7	0	0	0	0	0	0	0	0	0	2	0	1	2	0	0	0
Chemokine	0	0	0	0	0	0	0	0	1	0	0	3	1	0	0	0	0	0	0	0	0	0	0	0	0	0	0	0	0	0	1	1	0	41	0	0	0	0	0	0	0	0	3	0	1	0	12	2	0
Chemokine receptor	0	0	0	0	0	1	0	1	1	0	0	0	0	0	1	0	2	0	0	0	0	0	0	0	0	0	0	0	0	0	1	0	0	0	18	0	0	0	0	0	0	0	2	0	0	1	0	0	0
MHCI	0	0	0	0	0	0	0	0	0	0	0	0	0	0	0	0	0	0	0	0	0	0	0	0	0	0	0	0	0	0	0	0	0	0	0	8	0	0	0	0	0	0	1	0	0	0	0	0	0
MHCII	0	0	0	0	0	0	0	0	0	0	0	0	0	0	0	0	0	0	0	0	0	0	0	0	0	0	0	0	0	0	0	0	0	0	0	0	9	0	0	0	0	0	0	0	0	0	0	0	0
APC co inhibition	0	0	0	0	0	0	0	0	0	0	0	0	0	0	0	0	0	0	2	0	0	0	0	0	0	0	0	0	0	2	1	0	0	0	0	0	0	5	0	0	0	0	1	0	1	0	0	0	1
APC co stimulation	0	0	0	0	0	0	0	0	0	0	0	0	0	0	0	0	0	0	0	2	0	0	0	0	0	0	0	0	0	0	8	0	0	0	0	0	0	0	11	0	0	0	0	0	1	0	1	0	0
Type I IFN Reponse	0	0	0	0	0	0	0	0	0	0	0	0	0	0	1	0	0	0	0	0	0	0	0	0	0	0	0	0	0	0	0	1	0	0	0	0	0	0	0	10	0	0	0	0	0	0	1	0	0
Type II IFN Reponse	0	0	0	0	0	0	0	0	0	0	0	0	0	0	0	0	0	0	0	0	0	0	0	0	0	0	0	0	0	0	0	0	0	0	0	0	0	0	0	0	3	0	1	0	0	0	0	0	0
Invasion	0	0	0	0	0	0	0	0	0	0	0	0	0	0	0	0	0	0	0	0	0	0	10	1	0	26	16	0	0	0	0	0	0	0	0	0	0	0	0	0	0	97	12	1	2	2	1	1	1
Metastasis	0	0	0	0	0	0	0	0	0	0	0	0	0	0	0	3	1	0	1	0	2	1	18	0	5	31	17	2	0	1	2	0	2	3	2	1	0	1	0	0	1	12	166	3	18	11	3	17	0
Proliferation	0	0	0	0	0	0	0	0	0	0	0	0	0	0	0	0	0	0	0	0	0	0	0	0	0	0	0	0	0	0	0	0	0	0	0	0	0	0	0	0	0	1	3	15	1	0	0	0	0
Differentiation	0	1	2	0	1	0	1	0	0	2	1	0	0	0	0	0	0	0	0	0	1	1	39	4	3	6	2	1	0	0	2	0	1	1	0	0	0	1	1	0	0	2	18	1	201	3	2	14	2
Hypoxia	0	0	0	0	0	0	0	0	0	0	0	0	0	0	0	1	0	0	0	0	0	0	3	0	0	6	0	0	0	0	2	0	2	0	1	0	0	0	0	0	0	2	11	0	3	83	2	1	1
Quiescence	0	0	0	0	0	0	0	0	1	1	0	0	0	0	0	1	0	0	0	0	0	0	3	0	0	0	0	0	0	0	1	1	0	12	0	0	0	0	1	1	0	1	3	0	2	2	66	4	1
Stemness	0	0	0	0	0	0	1	0	0	0	0	0	0	0	0	0	0	0	0	0	4	1	10	1	1	7	1	1	0	0	1	0	0	2	0	0	0	0	0	0	0	1	17	0	14	1	4	166	0
Apoptosis	0	0	0	0	0	0	0	0	0	0	0	0	0	0	0	0	0	0	0	0	0	0	1	0	0	0	0	0	0	0	0	0	0	0	0	0	0	1	0	0	0	1	0	0	2	1	1	0	66
Inflammation	0	0	0	0	0	0	3	0	0	4	0	0	0	0	0	2	1	0	0	1	2	0	6	1	0	9	2	0	0	0	6	2	1	16	2	0	0	0	3	0	0	0	10	0	9	5	14	5	1
DNA damage	0	0	0	0	0	0	0	0	0	0	0	0	0	0	0	0	0	0	0	0	0	0	3	0	0	0	0	0	0	0	0	0	0	0	0	0	0	0	0	0	0	0	8	5	4	0	0	2	6
DNA repair	0	0	0	0	0	0	0	0	0	0	0	0	0	0	0	0	0	0	0	0	0	0	1	0	0	0	0	0	0	0	0	0	0	0	0	0	0	0	0	0	0	2	1	0	2	0	0	0	3
Cell cycle	0	0	0	0	0	0	0	0	0	0	0	0	0	0	0	0	0	0	0	0	1	0	1	0	0	0	0	0	0	0	0	0	0	0	0	0	0	0	0	0	0	4	5	5	0	1	1	1	0
Angiogenesis	0	0	0	0	0	0	0	0	0	0	0	0	0	0	0	1	0	0	0	0	0	0	11	1	0	11	3	2	0	0	0	0	0	0	0	0	0	0	0	0	0	7	23	0	10	4	1	5	0
Amino acid	0	0	0	0	0	0	0	0	0	0	1	0	0	0	0	3	0	0	0	0	3	0	0	0	0	1	1	0	0	0	0	0	0	0	0	0	0	0	0	0	0	4	1	0	0	1	0	1	0
Carbohydrate	0	0	0	0	0	0	0	0	0	0	0	0	0	0	0	0	0	0	0	0	3	0	3	0	0	15	5	0	0	0	0	0	0	0	0	0	0	0	0	0	0	5	6	0	0	13	0	3	1
Energy	0	0	0	0	0	0	1	0	0	0	0	0	0	0	0	0	0	0	0	0	0	0	2	0	0	1	0	0	0	0	0	0	0	0	0	0	0	0	0	0	0	1	1	0	2	1	0	0	1
Lipid	0	0	0	0	0	0	0	0	0	0	0	0	0	0	1	1	0	0	0	0	2	0	1	0	0	0	0	0	0	0	0	0	0	0	0	0	0	0	0	0	1	2	3	0	6	4	3	6	3
Nucleotide	0	0	0	0	0	0	0	0	0	0	0	0	0	0	0	0	0	0	0	0	0	0	0	0	0	0	0	0	0	0	2	0	0	0	0	0	0	0	0	0	0	0	1	0	1	1	0	1	0
TCA cycle	0	0	0	0	0	0	0	0	0	0	0	0	0	0	0	0	0	0	0	0	0	0	0	0	0	1	1	0	0	0	0	0	0	0	0	0	0	0	0	0	0	2	1	0	1	2	0	0	0
Vitamin cofactor	0	0	0	0	0	0	1	0	0	0	0	0	0	0	0	1	0	0	0	0	0	0	0	0	0	10	4	0	0	0	1	0	0	0	0	0	0	0	0	0	0	0	3	0	1	2	2	4	0
[truncated: 73 more columns]

## Sheet: Supplementary file 1c
Dataset	Source	Data accession	platform	Normalisation	tumor samples	normal samples	Available DFS data	Available OS data	cohort
GSE13067	PMID: 19088021	https://www.ncbi.nlm.nih.gov/geo/query/acc.cgi?acc=GSE13067	Affymetrix Human Genome U133 Plus 2.0 Array	RMA	74	-	-	-	Combined into CRC-AFFY cohort
GSE13294	PMID: 19088021	https://www.ncbi.nlm.nih.gov/geo/query/acc.cgi?acc=GSE13294	Affymetrix Human Genome U133 Plus 2.0 Array	RMA	155	-	-	-
GSE14333	PMID: 19996206	https://www.ncbi.nlm.nih.gov/geo/query/acc.cgi?acc=GSE14333	Affymetrix Human Genome U133 Plus 2.0 Array	RMA	157	-	126	-
GSE17536	PMID: 19914252	https://www.ncbi.nlm.nih.gov/geo/query/acc.cgi?acc=GSE17536	Affymetrix Human Genome U133 Plus 2.0 Array	RMA	177	-	145	177
GSE33113	PMID: 22056143	https://www.ncbi.nlm.nih.gov/geo/query/acc.cgi?acc=GSE33113	Affymetrix Human Genome U133 Plus 2.0 Array	RMA	90	-	90	-
GSE37892	PMID: 22917480	https://www.ncbi.nlm.nih.gov/geo/query/acc.cgi?acc=GSE37892	Affymetrix Human Genome U133 Plus 2.0 Array	RMA	130	-	130	-
GSE38832	PMID: 25320007	https://www.ncbi.nlm.nih.gov/geo/query/acc.cgi?acc=GSE38832	Affymetrix Human Genome U133 Plus 2.0 Array	RMA	122	-	92	-
GSE39582	PMID: 23700391	https://www.ncbi.nlm.nih.gov/geo/query/acc.cgi?acc=GSE39582	Affymetrix Human Genome U133 Plus 2.0 Array	RMA	566	19	557	562
TCGA-COAD/read	The Cancer Genome Atlas Program	https://portal.gdc.cancer.gov/	RNA-Seq	voom	619	41	535	614	Combined into CRC-RNAseq cohort
CPTAC-colon/rectum	The Cancer Genome Atlas Program	https://portal.gdc.cancer.gov/	RNA-Seq	voom	106	-	84	100
Notes: Samples that overlap in GSE14333 and GSE17536 were excluded from GSE14333. OS: overall survival; DFS: disease-free surval.

## Sheet: Supplementary file 1d
Univariate cox analysis and Kaplan-Meier method showed that the ability of of each TME signature to predict disease-free survival in the CRC-AFFY cohort.							Univariate cox analysis and Kaplan-Meier method showed that the ability of of each TME signature to predict overall survival in the CRC-AFFY cohort.							Univariate cox analysis and Kaplan-Meier method showed that the ability of of each TME signature to predict disease-free survival in the CRC-RNAseq cohort.							Univariate cox analysis and Kaplan-Meier method showed that the ability of of each TME signature to predict overall survival in the CRC-RNAseq cohort.
Signature	Kaplan-Meier method	Univariate cox analysis					Signature	Kaplan-Meier method	Univariate cox analysis					Signature	Kaplan-Meier method	Univariate cox analysis					Signature	Kaplan-Meier method	Univariate cox analysis
	P value(KM-log-rank)	Hazard ratio (HR)	HR.95%Low	HR.95%High	P value (cox)			P value(KM-log-rank)	Hazard ratio (HR)	HR.95%Low	HR.95%High	P value (cox)			P value(KM-log-rank)	Hazard ratio (HR)	HR.95%Low	HR.95%High	P value (cox)			P value(KM-log-rank)	Hazard ratio (HR)	HR.95%Low	HR.95%High	P value (cox)
aDCs	0.405792	1.02587	0.79136	1.32986	0.84708		aDCs	0.0100532	0.746734	0.569776	0.97865	0.0343146		aDCs	0.237946	0.829374	0.574191	1.19797	0.31867		aDCs	0.59129	0.874548	0.613766	1.24613	0.458101
Amino acid	4.35197e-08	0.0930887	0.0414609	0.209004	8.74756e-09		Amino acid	0.035234	0.291285	0.127045	0.667849	0.0035738		Amino acid	0.00033668	0.332117	0.151013	0.730411	0.0061213		Amino acid	0.128274	0.65367	0.305545	1.39843	0.27321
Angiogenesis	2.64791e-06	3.11462	2.06895	4.68879	5.2264e-08		Angiogenesis	0.0463591	1.78315	1.16995	2.71773	0.00714568		Angiogenesis	0.00746987	2.00506	1.10455	3.63975	0.022206		Angiogenesis	0.0874539	1.47422	0.838796	2.59102	0.177338
Antitumor cytokines	0.955091	0.950287	0.693236	1.30265	0.75134		Antitumor cytokines	0.0346887	0.664102	0.474469	0.929525	0.0170343		Antitumor cytokines	0.125344	0.634805	0.399964	1.00754	0.0538414		Antitumor cytokines	0.244736	0.760684	0.491526	1.17723	0.219575
APC co inhibition	0.280577	1.19992	0.915736	1.57229	0.186294		APC co inhibition	0.296042	0.789683	0.598591	1.04178	0.0948362		APC co inhibition	0.031628	0.542756	0.377925	0.779479	0.000936468		APC co inhibition	0.283048	0.742868	0.531752	1.0378	0.0814295
APC co stimulation	0.00241084	1.82955	1.27289	2.62966	0.00110032		APC co stimulation	0.813812	1.00907	0.694506	1.46612	0.962211		APC co stimulation	0.15503	0.688766	0.422432	1.12302	0.134961		APC co stimulation	0.245663	0.751325	0.471196	1.19799	0.229716
Apoptosis	0.000153992	3.83905	1.91883	7.68088	0.000143636		Apoptosis	0.121658	2.00582	0.968874	4.15258	0.060821		Apoptosis	0.257772	0.445077	0.137137	1.4445	0.177755		Apoptosis	0.562587	1.5642	0.523997	4.66937	0.422691
B cells	0.146649	1.26204	0.963888	1.65242	0.0905541		B cells	0.699533	1.00931	0.761819	1.33721	0.948506		B cells	0.0378522	0.708524	0.507114	0.989928	0.043457		B cells	0.136229	0.757209	0.546811	1.04856	0.0940392
Cancer Stem Cells	0.000504489	2.7019	1.68569	4.33073	3.63867e-05		Cancer Stem Cells	0.539103	1.21848	0.745671	1.99107	0.430307		Cancer Stem Cells	0.0594447	2.56289	1.22594	5.35787	0.0123711		Cancer Stem Cells	0.554709	1.19144	0.58338	2.4333	0.630671
Carbohydrate	0.561975	2.4208	0.914627	6.4073	0.075032		Carbohydrate	0.220456	0.561638	0.212002	1.4879	0.245816		Carbohydrate	0.0299952	0.304834	0.0961304	0.966641	0.0436345		Carbohydrate	0.209088	0.653592	0.219333	1.94764	0.445243
Cell and ECM interactions	3.65536e-09	2.99892	2.21169	4.06636	1.55805e-12		Cell and ECM interactions	0.0193269	1.59702	1.17931	2.16268	0.00247763		Cell and ECM interactions	0.0486946	1.85216	1.13448	3.02387	0.0137224		Cell and ECM interactions	0.213023	1.35854	0.853204	2.16318	0.196686
Cell cycle	6.92377e-06	0.454247	0.339981	0.606917	9.40763e-08		Cell cycle	0.217437	0.731813	0.543564	0.985257	0.0396043		Cell cycle	0.0130103	0.604001	0.390956	0.933141	0.0231007		Cell cycle	0.0177364	0.563014	0.371569	0.853097	0.00674238
Checkpoint molecules	0.879745	0.950395	0.73106	1.23554	0.703909		Checkpoint molecules	0.102354	0.776609	0.591958	1.01886	0.0679879		Checkpoint molecules	0.0280813	0.611414	0.432593	0.864154	0.00531859		Checkpoint molecules	0.0807821	0.762301	0.550895	1.05483	0.101457
Chemokine	0.889851	1.10758	0.758728	1.61683	0.596531		Chemokine	0.786826	0.796737	0.536782	1.18259	0.25945		Chemokine	0.00222956	0.41204	0.24474	0.693701	0.000850054		Chemokine	0.0831473	0.567197	0.345585	0.930924	0.0248898
Chemokine receptor	0.0198499	1.37843	0.981953	1.93498	0.0636364		Chemokine receptor	0.429775	0.735809	0.518884	1.04342	0.0851673		Chemokine receptor	0.121048	0.674443	0.451847	1.0067	0.0539423		Chemokine receptor	0.295255	0.773572	0.527678	1.13405	0.188367
Cytolytic activity	0.274265	0.923938	0.74789	1.14143	0.463253		Cytolytic activity	0.290397	0.868737	0.699156	1.07945	0.20409		Cytolytic activity	0.00749119	0.624963	0.461237	0.846809	0.00242309		Cytolytic activity	0.33565	0.841796	0.632491	1.12036	0.237706
DCs	0.027144	1.39027	1.091	1.77162	0.00771657		DCs	0.664515	1.01885	0.797746	1.30123	0.881074		DCs	0.0727345	0.710741	0.508379	0.993654	0.0458034		DCs	0.717964	0.798213	0.581005	1.09663	0.164292
Differentiation	0.000138909	7.08262	3.33729	15.0312	3.41484e-07		Differentiation	0.337932	2.05532	0.936344	4.51153	0.072495		Differentiation	0.883498	0.956595	0.379906	2.40869	0.924963		Differentiation	0.631981	0.814807	0.339293	1.95675	0.646821
DNA damage	0.000165906	0.199679	0.108954	0.365951	1.86457e-07		DNA damage	0.093406	0.517094	0.282893	0.945184	0.0321003		DNA damage	0.00224492	0.162154	0.0542802	0.484412	0.00112177		DNA damage	0.00727375	0.13769	0.0482886	0.392611	0.000208249
DNA repair	6.37372e-07	0.275342	0.178468	0.424802	5.54966e-09		DNA repair	0.0773939	0.631714	0.406408	0.981927	0.0412502		DNA repair	0.223083	0.545822	0.277698	1.07282	0.0790739		DNA repair	0.0628773	0.475649	0.250275	0.903974	0.0233225
ECM	3.87593e-08	4.2973	2.79785	6.60035	2.75739e-11		ECM	0.0488474	1.67114	1.09469	2.55114	0.0173536		ECM	0.0191166	1.68189	0.952683	2.96926	0.0730022		ECM	0.350285	1.16831	0.681906	2.00166	0.571215
Effector cells	0.0841205	0.833703	0.636971	1.0912	0.185358		Effector cells	0.165683	0.737813	0.559703	0.972602	0.031003		Effector cells	0.0041044	0.567105	0.393138	0.818053	0.00241101		Effector cells	0.100333	0.814434	0.577957	1.14767	0.240825
EMT	4.31878e-06	2.44535	1.80428	3.31418	8.1848e-09		EMT	0.155623	1.39426	1.03257	1.88264	0.0300726		EMT	0.00512282	1.65133	1.09511	2.49007	0.0166872		EMT	0.0775463	1.11558	0.757477	1.64297	0.579768
Endothelium	0.037265	2.61548	1.52354	4.49001	0.000488476		Endothelium	0.571711	1.33245	0.765032	2.32073	0.310647		Endothelium	0.55702	0.953973	0.483788	1.88112	0.891807		Endothelium	0.777724	1.22076	0.646193	2.30619	0.538827
Energy	0.000160476	5.50093	2.55776	11.8307	1.27941e-05		Energy	0.224274	2.09931	0.953519	4.62193	0.0655102		Energy	0.808827	0.821393	0.291541	2.31421	0.709673		Energy	0.812328	0.844479	0.316708	2.25175	0.735507
Hypoxia	0.00068118	2.39921	1.61188	3.57112	1.61434e-05		Hypoxia	0.199797	1.76576	1.17415	2.65547	0.00631178		Hypoxia	0.737426	1.19143	0.623655	2.27611	0.595873		Hypoxia	0.352258	1.63659	0.895538	2.99086	0.109306
iDCs	0.626524	1.09244	0.881388	1.35403	0.419539		iDCs	0.0760875	0.824229	0.661564	1.02689	0.0848181		iDCs	0.0435766	0.707741	0.524877	0.954315	0.0234164		iDCs	0.00392615	0.604628	0.451156	0.810307	0.000757243
Immunostimulator	0.117713	1.57606	1.07051	2.32036	0.0211537		Immunostimulator	0.418936	0.853018	0.569405	1.2779	0.440773		Immunostimulator	0.0212976	0.541623	0.329272	0.89092	0.0157429		Immunostimulator	0.428138	0.794527	0.498508	1.26633	0.333477
Inflammation	0.00153213	2.0271	1.38553	2.96575	0.000273173		Inflammation	0.899464	1.15976	0.780494	1.72333	0.463259		Inflammation	0.747279	0.681819	0.384256	1.20981	0.190537		Inflammation	0.573108	0.837124	0.490963	1.42735	0.51375
Invasion	4.02261e-06	2.30177	1.68207	3.14979	1.89365e-07		Invasion	0.0318513	1.41919	1.03227	1.95114	0.0311233		Invasion	0.0762875	1.49807	0.931665	2.40881	0.0953406		Invasion	0.46556	1.12246	0.716094	1.75944	0.614429
Lipid	0.831427	0.774503	0.24071	2.49202	0.668236		Lipid	0.258382	0.380666	0.111057	1.30479	0.124371		Lipid	0.000189687	0.0660848	0.0134462	0.32479	0.000825019		Lipid	0.126829	0.241645	0.0548387	1.0648	0.06052
M1 macrophages	0.18598	1.04179	0.74333	1.46008	0.812107		M1 macrophages	0.414964	0.767124	0.540424	1.08892	0.137989		M1 macrophages	0.0212196	0.653786	0.411756	1.03808	0.0716189		M1 macrophages	0.223338	0.781498	0.504552	1.21046	0.269425
M2 macrophages	7.97906e-05	1.62896	1.29412	2.05044	3.238e-05		M2 macrophages	0.0257897	1.17184	0.924255	1.48574	0.190365		M2 macrophages	0.183325	0.909239	0.648285	1.27523	0.58144		M2 macrophages	0.985078	1.09366	0.796233	1.50218	0.580361
Mast cells	0.416914	1.2094	0.970873	1.50654	0.0898393		Mast cells	0.622805	0.96264	0.76646	1.20903	0.743318		Mast cells	0.517034	0.884103	0.654111	1.19496	0.422954		Mast cells	0.0753601	0.759288	0.563943	1.0223	0.0695814
Matrix remodeling	3.56775e-08	5.10369	3.23196	8.05937	2.701e-12		Matrix remodeling	0.0531715	1.76779	1.13575	2.75156	0.0116078		Matrix remodeling	0.0316159	1.64936	0.896371	3.0349	0.107762		Matrix remodeling	0.854302	0.992931	0.558602	1.76496	0.980715
MDSCs	0.230012	1.11473	0.848926	1.46376	0.434512		MDSCs	0.388102	0.970406	0.732337	1.28587	0.834308		MDSCs	0.63724	0.76841	0.520919	1.13349	0.184107		MDSCs	0.935388	0.849185	0.588347	1.22566	0.382582
Mesenchymal cell	2.96289e-05	5.94408	3.18396	11.0969	2.19321e-08		Mesenchymal cell	0.568548	1.88945	0.986335	3.61948	0.0550502		Mesenchymal cell	0.0275726	2.34144	1.03536	5.29511	0.0410095		Mesenchymal cell	0.0685876	1.47043	0.677285	3.19241	0.329663
Mesenchymal stem cell	0.00174051	1.81454	1.24742	2.63948	0.00183182		Mesenchymal stem cell	0.441199	1.33706	0.902666	1.9805	0.147309		Mesenchymal stem cell	0.0144225	1.79702	1.04049	3.10364	0.0355259		Mesenchymal stem cell	0.587082	0.750323	0.448272	1.2559	0.274398
Metastasis	1.84989e-07	4.13168	2.50615	6.81157	2.66961e-08		Metastasis	0.0824783	1.84036	1.10464	3.06611	0.0191764		Metastasis	0.184507	1.32335	0.641302	2.73079	0.448445		Metastasis	0.906892	0.922044	0.466355	1.823	0.815475
MHCI	0.726352	1.07501	0.8458	1.36633	0.554409		MHCI	0.238609	0.867497	0.67803	1.10991	0.258234		MHCI	0.0489185	0.647833	0.458572	0.915206	0.0137937		MHCI	0.161667	0.771135	0.554195	1.073	0.123085
MHCII	0.0182668	1.29059	1.02479	1.62533	0.0301538		MHCII	0.399375	0.859673	0.677115	1.09145	0.21443		MHCII	0.0447793	0.736886	0.540039	1.00548	0.0541702		MHCII	0.565514	0.944168	0.702556	1.26887	0.703239
Neutrophils	0.45855	1.10815	0.78691	1.56052	0.55658		Neutrophils	0.917716	1.01949	0.72486	1.43388	0.911675		Neutrophils	0.191489	0.775406	0.512611	1.17293	0.228355		Neutrophils	0.546487	0.77028	0.517086	1.14745	0.1993
NK cells	0.043293	0.843132	0.613237	1.15921	0.293514		NK cells	0.0550768	0.723154	0.518971	1.00767	0.0555145		NK cells	0.000119304	0.425946	0.277286	0.654307	9.75097e-05		NK cells	0.0188848	0.705625	0.475997	1.04603	0.0825786
Nucleotide	0.000529764	0.245913	0.131699	0.459179	1.06849e-05		Nucleotide	0.0672112	0.453411	0.240419	0.855099	0.0145427		Nucleotide	0.000370927	0.215695	0.0934015	0.498113	0.000328141		Nucleotide	0.0506371	0.445822	0.201099	0.988357	0.0467236
pDCs	0.265638	0.883411	0.602709	1.29484	0.525137		pDCs	0.0101557	0.549687	0.369534	0.817668	0.00314197		pDCs	0.0467268	0.752761	0.468925	1.2084	0.239565		pDCs	0.459533	1.02746	0.661132	1.59678	0.904134
Proliferation	1.14155e-05	0.456557	0.348777	0.597644	1.15224e-08		Proliferation	0.0410071	0.669444	0.508477	0.881369	0.00423802		Proliferation	0.0203317	0.602716	0.393847	0.922356	0.0196862		Proliferation	0.0122262	0.572574	0.379757	0.863291	0.00777573
Protumor cytokines	0.00167664	1.62839	1.20699	2.19691	0.00141653		Protumor cytokines	0.29283	1.22141	0.90031	1.65703	0.198735		Protumor cytokines	0.915127	1.04211	0.670607	1.61941	0.854498		Protumor cytokines	0.444412	1.21764	0.798943	1.85576	0.359718
Quiescence	0.00333617	1.95329	1.30956	2.91347	0.00103082		Quiescence	0.295624	1.32792	0.882811	1.99744	0.173334		Quiescence	0.616159	0.790683	0.428832	1.45786	0.451838		Quiescence	0.345069	0.782293	0.437177	1.39985	0.40824
Stemness	0.209043	1.37272	0.593432	3.17534	0.459069		Stemness	0.313962	0.886239	0.373951	2.10033	0.783836		Stemness	0.488479	1.02589	0.328195	3.20675	0.964945		Stemness	0.180361	0.551766	0.182942	1.66417	0.291102
T cell co inhibition	0.126772	1.16965	0.89996	1.52016	0.241284		T cell co inhibition	0.544279	0.845971	0.643847	1.11155	0.229837		T cell co inhibition	0.00941286	0.569148	0.397587	0.814738	0.00207409		T cell co inhibition	0.0375263	0.702294	0.501214	0.984044	0.0400314
T cell co stimulation	0.359381	0.851633	0.631557	1.1484	0.292408		T cell co stimulation	0.0484542	0.669603	0.49149	0.912263	0.0110235		T cell co stimulation	0.00161332	0.559668	0.386402	0.810629	0.0021357		T cell co stimulation	0.108222	0.732544	0.515429	1.04112	0.082687
T cells	0.517684	0.916731	0.718245	1.17007	0.48495		T cells	0.215333	0.72897	0.568238	0.935167	0.0128687		T cells	0.0183763	0.609671	0.437589	0.849424	0.00345072		T cells	0.499492	0.815578	0.596333	1.11543	0.201906
TCA cycle	0.00041182	0.355322	0.220203	0.573351	2.24965e-05		TCA cycle	0.0119668	0.545877	0.329489	0.904375	0.0187646		TCA cycle	0.00893484	0.425924	0.24655	0.735799	0.00221433		TCA cycle	0.390639	0.731485	0.431411	1.24028	0.245787
Tfh cells	0.759024	0.847883	0.662421	1.08527	0.190115		Tfh cells	0.328332	0.734719	0.567359	0.951447	0.0194215		Tfh cells	0.0355615	0.749054	0.534926	1.0489	0.0925563		Tfh cells	0.12727	0.836643	0.60545	1.15612	0.279762
Th1 cells	0.526798	0.837544	0.619002	1.13324	0.25049		Th1 cells	0.0310787	0.717233	0.524588	0.980623	0.0372901		Th1 cells	0.0163434	0.566143	0.385518	0.831396	0.00371042		Th1 cells	0.148039	0.809898	0.563707	1.16361	0.254116
Th17 cells	0.293725	0.858468	0.548318	1.34405	0.504644		Th17 cells	0.199932	0.760857	0.485138	1.19328	0.233905		Th17 cells	0.0308095	0.48473	0.272774	0.861385	0.0135634		Th17 cells	0.158586	0.635906	0.367883	1.0992	0.104964
Th2 cells	0.572883	1.18972	0.847366	1.67039	0.315688		Th2 cells	0.570808	0.931489	0.653073	1.3286	0.695258		Th2 cells	0.601438	0.835399	0.551592	1.26523	0.395786		Th2 cells	0.602352	0.745595	0.499937	1.11196	0.149993
Treg cells	0.962426	1.02607	0.751283	1.40135	0.871461		Treg cells	0.0691121	0.667198	0.481042	0.925394	0.0153291		Treg cells	0.0040172	0.64562	0.435567	0.956972	0.0293323		Treg cells	0.0546642	0.682555	0.471005	0.98912	0.0436164
Type I IFN Reponse	0.411789	1.2277	0.962427	1.56608	0.0986112		Type I IFN Reponse	0.856109	0.935318	0.724412	1.20763	0.608017		Type I IFN Reponse	0.305294	0.985583	0.68661	1.41474	0.937238		Type I IFN Reponse	0.807882	1.12629	0.80235	1.58101	0.491891
Type II IFN Reponse	0.0135141	1.45354	1.14113	1.85147	0.00245151		Type II IFN Reponse	0.143575	1.24527	0.968906	1.60047	0.086666		Type II IFN Reponse	0.46678	0.991282	0.665565	1.4764	0.965635		Type II IFN Reponse	0.074065	1.22742	0.846475	1.77979	0.279777
Vitamin cofactor	0.483511	0.54934	0.204539	1.47539	0.234675		Vitamin cofactor	0.868095	0.529235	0.19329	1.44906	0.215641		Vitamin cofactor	0.000502833	0.135027	0.0422579	0.431452	0.000729611		Vitamin cofactor	0.022155	0.373214	0.123532	1.12755	0.0806095

## Sheet: Supplementary file 1e
Metabolism signatures	C1 vs the other subtypes				C2 vs the other subtypes				C3 vs the other subtypes				C4 vs the other subtypes				category
	difference	C1	Other	FDR	difference	Other	C2	FDR	difference	Other	C3	FDR	difference	Other	C4	FDR
Alanine, aspartate and glutamate metabolism	0.0718721	0.054822	-0.01705	2.10039e-12	-0.0867552	0.0263246	-0.0604306	2.91425e-14	-0.0973754	0.0316896	-0.0656858	5.66089e-16	0.0962164	-0.0108411	0.0853753	2.80909e-15	Amino acid metabolism
alpha-Linolenic acid metabolism	-0.0557435	-0.0360737	0.0196698	2.40987e-06	0.129175	-0.0267192	0.102456	2.16003e-20	-0.0332768	0.00782888	-0.0254479	0.00778813	-0.0144696	0.0027904	-0.0116792	0.379453	Lipid metabolism
Amino sugar and nucleotide sugar metabolism	-0.0479821	-0.0286117	0.0193704	6.27893e-06	0.0273368	-0.00328743	0.0240493	0.0239835	-0.0349945	0.0106936	-0.0243009	0.00842666	0.0802829	-0.0137568	0.0665261	3.18473e-09	Carbohydrate metabolism
Arachidonic acid metabolism	-0.175946	-0.111207	0.0647388	2.08493e-69	0.188429	-0.0365106	0.151918	9.2877e-58	0.0701674	-0.0144404	0.0557269	5.71335e-10	-0.0204949	0.00641257	-0.0140824	0.0826242	Lipid metabolism
Arginine and proline metabolism	0.0615027	0.0429549	-0.0185478	4.25828e-08	-0.039253	0.0113625	-0.0278905	0.00456244	-0.0818223	0.0228009	-0.0590213	1.53882e-10	0.0449403	-0.00573544	0.0392049	0.00174162	Amino acid metabolism
Arginine biosynthesis	0.0507016	0.0413085	-0.00939307	0.000230101	-0.0484822	0.0185854	-0.0298968	0.00266089	-0.152314	0.0449429	-0.107371	1.15582e-21	0.149657	-0.0214139	0.128243	1.23307e-18	Amino acid metabolism
Ascorbate and aldarate metabolism	0.0623454	0.0490903	-0.0132552	0.000391423	0.0601659	-0.00352432	0.0566416	0.00286981	-0.0689706	0.0253261	-0.0436445	0.00028535	-0.0722466	0.0233574	-0.0488892	0.000709167	Carbohydrate metabolism
beta-Alanine metabolism	0.00378141	0.00116965	-0.00261177	0.699257	0.0465952	-0.0108677	0.0357275	0.00032652	-0.0552175	0.0119057	-0.0433118	4.58047e-06	0.00963805	-0.00320275	0.00643531	0.430875	Amino acid metabolism
Biosynthesis of unsaturated fatty acids	0.0544851	0.035621	-0.0188642	4.8652e-05	-0.0784752	0.016635	-0.0618402	8.57673e-07	-0.00672204	0.00207442	-0.00464762	0.620591	0.0098712	-0.00150916	0.00836204	0.519536	Lipid metabolism
Biotin metabolism	0.165803	0.109128	-0.0566749	9.12759e-10	-0.116983	0.0262584	-0.090725	0.000295804	-0.228091	0.0565874	-0.171504	2.30515e-14	0.14105	-0.0261249	0.114925	8.12084e-06	Cofactors and vitamins metabolism
Butanoate metabolism	0.120132	0.0770917	-0.0430406	1.46065e-16	-0.00346452	0.000303251	-0.00316127	0.705663	-0.135803	0.0319939	-0.103809	5.20449e-16	-0.0141189	0.00242109	-0.0116978	0.390438	Carbohydrate metabolism
Caffeine metabolism	0.0436907	0.0239488	-0.019742	0.0733931	0.216758	-0.0488861	0.167872	1.75338e-13	-0.222052	0.0487468	-0.173306	1.7523e-15	-0.0318852	0.00215654	-0.0297286	0.26763	others
Cholesterol Biosynthesis	0.18666	0.121921	-0.0647395	6.83593e-21	-0.188133	0.0402511	-0.147882	8.30308e-16	-0.0204867	0.00638737	-0.0140994	0.374076	-0.0514028	0.0118075	-0.0395953	0.0333679	Lipid metabolism
Cysteine and methionine metabolism	0.0771774	0.0559068	-0.0212706	7.42634e-14	-0.140797	0.0351184	-0.105679	6.41866e-32	-0.0695978	0.0227236	-0.0468742	1.28583e-08	0.112294	-0.0164033	0.0958908	2.42246e-19	Amino acid metabolism
D-Arginine and D-ornithine metabolism	0.0363179	0.0167345	-0.0195834	0.247515	0.263281	-0.0609269	0.202354	6.04358e-13	-0.236103	0.0496416	-0.186461	1.03989e-11	-0.0528963	0.00391241	-0.0489839	0.157392	Amino acid metabolism
D-Glutamine and D-glutamate metabolism	0.0130501	0.0147976	0.00174751	0.564839	-0.0823408	0.0233392	-0.0590016	0.000608688	-0.0346628	0.0146495	-0.0200133	0.127097	0.104643	-0.014607	0.0900357	1.09151e-05	Amino acid metabolism
Drug metabolism - cytochrome P450	-0.104785	-0.063572	0.0412127	1.16843e-15	0.199897	-0.0371466	0.162751	1.75927e-37	-0.000257543	0.00409016	0.00383262	0.978459	-0.0540044	0.0148589	-0.0391454	0.000884673	others
Drug metabolism - other enzymes	0.0288484	0.0194343	-0.0094141	0.00451696	0.00959002	-0.00115231	0.00843771	0.29657	-0.0894834	0.022175	-0.0673084	3.78446e-18	0.0504234	-0.00928905	0.0411344	1.6051e-06	others
Ether lipid metabolism	-0.109534	-0.0681035	0.0414308	3.95157e-30	0.101315	-0.0183077	0.0830072	8.32616e-19	0.0201951	-0.00225745	0.0179377	0.0794979	0.0301684	-0.0034887	0.0266797	0.00484302	Lipid metabolism
Fatty acid biosynthesis	0.163652	0.1056	-0.0580516	5.34396e-30	-0.161222	0.0332309	-0.127992	1.85645e-22	-0.027386	0.00655659	-0.0208294	0.162614	-0.0381821	0.00767911	-0.030503	0.0236082	Lipid metabolism
Fatty acid degradation	0.0438631	0.0309802	-0.0128828	0.00189278	0.0045639	0.00174234	0.00630625	0.963502	-0.0504396	0.014718	-0.0357216	0.0023647	-0.0101325	0.00471444	-0.00541807	0.601536	Lipid metabolism
Fatty acid elongation	-0.0261762	-0.0153067	0.0108695	0.077223	-0.0373013	0.00926402	-0.0280373	0.0223743	-0.0062002	0.00306006	-0.00314014	0.687694	0.082456	-0.0149554	0.0675006	1.25702e-06	Lipid metabolism
Folate biosynthesis	0.0676538	0.0525303	-0.0151235	1.47067e-07	-0.0569776	0.0206205	-0.0363571	5.57533e-05	-0.105778	0.0341243	-0.0716542	1.00375e-12	0.0813848	-0.0074371	0.0739477	7.47215e-08	Cofactors and vitamins metabolism
Fructose and mannose metabolism	0.0149028	0.00799705	-0.00690575	0.29772	-0.0352357	0.0056406	-0.0295951	0.0380464	-0.100147	0.0222791	-0.0778679	1.23099e-10	0.128149	-0.0273167	0.100832	1.34627e-14	Carbohydrate metabolism
Galactose metabolism	-0.035441	-0.0239578	0.0114832	0.00199458	0.0447388	-0.0103088	0.03443	0.000721514	-0.0707401	0.0157861	-0.054954	4.33373e-08	0.0851286	-0.0181655	0.0669631	1.00577e-09	Carbohydrate metabolism
Gluconeogenesis	0.0395181	0.0279533	-0.0115649	0.00040223	-0.0269704	0.00801396	-0.0189564	0.0483435	-0.0889899	0.0236927	-0.0652972	6.41729e-12	0.071925	-0.0119656	0.0599594	3.79779e-07	Carbohydrate metabolism
Glutathione metabolism	-0.0140874	-0.00783043	0.00625698	0.175463	-0.0198249	0.00534148	-0.0144834	0.0729295	-0.00813252	0.00319844	-0.00493408	0.371219	0.0495554	-0.00868011	0.0408753	1.17454e-05	Amino acid metabolism
Glycerolipid metabolism	-0.00395579	0.000572472	0.00452826	0.623788	0.0257731	-0.0021843	0.0235888	0.0126364	0.0160499	-0.000705205	0.0153447	0.117626	-0.0388306	0.0109118	-0.0279189	0.00032009	Lipid metabolism
Glycerophospholipid metabolism	-0.0199349	-0.0154972	0.00443765	0.00443233	0.0371238	-0.0102833	0.0268405	2.31072e-06	0.0033908	-0.00344554	-5.47369e-05	0.7922	-0.0132479	2.03381e-05	-0.0132276	0.0986363	Lipid metabolism
Glycine, serine and threonine metabolism	0.0478	0.028324	-0.019476	8.58441e-06	-0.022031	0.00202432	-0.0200066	0.0848061	-0.0823663	0.01714	-0.0652263	6.74254e-12	0.0475545	-0.0120504	0.035504	0.000192414	Amino acid metabolism
Glycolysis	0.0205806	0.0147861	-0.00579448	0.0519654	-0.0208219	0.00579771	-0.0150242	0.144965	-0.0673983	0.0175909	-0.0498074	8.42042e-08	0.0682272	-0.0121738	0.0560534	1.21405e-06	Carbohydrate metabolism
Glycosaminoglycan biosynthesis - chondroitin sulfate / dermatan sulfate	-0.344795	-0.233976	0.110819	5.48553e-71	0.101846	-0.0325136	0.0693322	1.3304e-05	0.353183	-0.0958092	0.257373	2.07951e-56	-0.0117697	-0.00917487	-0.0209446	0.966314	Glycan biosynthesis and metabolism
Glycosaminoglycan biosynthesis - heparan sulfate / heparin	-0.0322681	-0.0235909	0.00867718	0.0107543	-0.052534	0.00804758	-0.0444864	0.000514788	0.0840503	-0.022829	0.0612213	6.87608e-09	0.00442487	-0.00366088	0.000763988	0.698084	Glycan biosynthesis and metabolism
Glycosaminoglycan biosynthesis - keratan sulfate	-0.143135	-0.0985948	0.0445402	4.09696e-19	0.144398	-0.0359962	0.108402	2.55161e-15	-0.00171415	-0.00584376	-0.0075579	0.778471	0.0590243	-0.0180897	0.0409346	0.00283298	Glycan biosynthesis and metabolism
Glycosaminoglycan degradation	-0.139828	-0.0992137	0.0406143	4.44865e-25	0.164432	-0.0428753	0.121557	4.50511e-25	0.0682749	-0.0252965	0.0429785	1.94652e-05	-0.0454451	0.000108545	-0.0453365	0.00848549	Glycan biosynthesis and metabolism
Glycosphingolipid biosynthesis - ganglio series	-0.259657	-0.16497	0.094687	5.03798e-67	0.204668	-0.0396132	0.165055	1.23093e-30	0.149761	-0.0331901	0.116571	3.97973e-19	-0.00772017	0.00409303	-0.00362714	0.640385	Glycan biosynthesis and metabolism
Glycosphingolipid biosynthesis - globo and isoglobo series	-0.191244	-0.123997	0.067247	2.36163e-40	0.130836	-0.027568	0.103268	6.90694e-15	0.122436	-0.029833	0.0926031	1.50627e-14	0.00087336	-0.00079328	8.00799e-05	0.876173	Glycan biosynthesis and metabolism
Glycosphingolipid biosynthesis - lacto and neolacto series	-0.0395077	-0.0244588	0.0150489	0.00283984	0.147751	-0.0294049	0.118346	1.09566e-20	-0.0517547	0.0133785	-0.0383762	0.000536614	-0.0356643	0.00818143	-0.0274828	0.0301512	Glycan biosynthesis and metabolism
Glycosylphosphatidylinositol (GPI)-anchor biosynthesis	0.149242	0.100814	-0.0484279	3.07721e-26	-0.146135	0.0346336	-0.111502	2.85299e-18	-0.0685167	0.0208813	-0.0476354	1.87126e-05	0.0136105	0.00180283	0.0154134	0.485645	Glycan biosynthesis and metabolism
Glyoxylate and dicarboxylate metabolism	0.130251	0.0874441	-0.0428064	4.85163e-24	-0.0516117	0.0140455	-0.0375662	0.000514206	-0.143408	0.0376334	-0.105775	6.04578e-23	0.0291676	-0.00243501	0.0267326	0.05454	Carbohydrate metabolism
Histidine metabolism	-0.02714	-0.0172056	0.00993436	0.0441605	0.105503	-0.0214283	0.0840748	9.38993e-13	-0.0325923	0.00808038	-0.0245119	0.0165877	-0.0319404	0.00670889	-0.0252315	0.0241131	Amino acid metabolism
Inositol phosphate metabolism	-0.0440056	-0.0276146	0.016391	5.54494e-07	0.0362256	-0.00668664	0.0295389	0.00438355	0.0151988	-0.00285146	0.0123474	0.0798442	0.00865928	-0.000961381	0.0076979	0.214952	Carbohydrate metabolism
Linoleic acid metabolism	-0.0494831	-0.0314259	0.0180572	0.000138356	0.158033	-0.0320544	0.125979	1.23928e-25	-0.0683264	0.0168012	-0.0515252	1.09346e-06	-0.0131306	0.00313088	-0.00999974	0.407664	Lipid metabolism
Lipoic acid metabolism	0.130824	0.0944578	-0.0363659	9.81534e-06	-0.21903	0.0551746	-0.163855	7.10889e-10	-0.151762	0.0462706	-0.105491	3.34681e-06	0.208604	-0.031776	0.176828	3.85363e-09	Cofactors and vitamins metabolism
Lysine degradation	0.143252	0.0961165	-0.0471357	4.39736e-40	-0.173927	0.0395248	-0.134402	5.37662e-42	-0.0375945	0.0126694	-0.0249251	0.0016758	0.0154753	0.00059536	0.0160707	0.220965	Amino acid metabolism
Mannose type O-glycan biosynthesis	0.104972	0.0619857	-0.0429866	7.21101e-19	-0.0174899	-0.00213345	-0.0196233	0.243617	-0.0764139	0.0124973	-0.0639166	3.60853e-09	-0.0454612	0.0033809	-0.0420803	0.0016808	Glycan biosynthesis and metabolism
Metabolism of xenobiotics by cytochrome P450	-0.0822728	-0.0505258	0.0317471	2.88924e-12	0.180719	-0.0346733	0.146046	1.23875e-36	-0.0314326	0.0100519	-0.0213807	0.0206008	-0.0312588	0.00882046	-0.0224384	0.0500582	others
Mucin type O-glycan biosynthesis	0.0142817	0.0124988	-0.00178282	0.294991	0.0654165	-0.0101895	0.055227	1.00306e-05	0.0218353	-0.00192502	0.0199103	0.153412	-0.11187	0.02572	-0.0861498	4.76017e-13	Glycan biosynthesis and metabolism
N-Glycan biosynthesis	0.0522425	0.0375092	-0.0147333	2.25254e-06	-0.0658398	0.0173673	-0.0484724	2.67705e-07	-0.0290754	0.0107433	-0.0183321	0.0226283	0.025514	-0.00131117	0.0242028	0.0486404	Glycan biosynthesis and metabolism
Nicotinate and nicotinamide metabolism	-0.0313734	-0.0158233	0.0155501	0.00185212	0.0561909	-0.00715739	0.0490335	2.5577e-05	-0.0203144	0.00926421	-0.0110502	0.11422	0.0104967	0.00231189	0.0128085	0.250364	Cofactors and vitamins metabolism
Nitrogen metabolism	-0.108334	-0.0563738	0.0519598	8.29815e-12	0.191197	-0.0258666	0.16533	3.29192e-24	-0.0473281	0.0248096	-0.0225185	0.00705493	0.0132783	0.0108536	0.0241319	0.434651	Energy metabolism
One carbon pool by folate	0.179254	0.121462	-0.0577913	7.30119e-33	-0.295912	0.0667714	-0.22914	1.20942e-60	-0.120599	0.0345954	-0.086004	3.59586e-13	0.182567	-0.0307939	0.151773	8.03904e-24	Cofactors and vitamins metabolism
Other glycan degradation	-0.0341253	-0.0332472	0.000878045	0.0187502	0.159284	-0.0440414	0.115243	2.71845e-19	-0.0235755	-0.00560624	-0.0291817	0.188616	-0.0870474	0.00622516	-0.0808223	1.16707e-06	Glycan biosynthesis and metabolism
Other types of O-glycan biosynthesis	0.0423284	0.0209499	-0.0213786	0.00154711	0.0104107	-0.00850228	0.00190841	0.498899	0.0254269	-0.0124251	0.0130018	0.0982828	-0.0998754	0.0136715	-0.0862039	4.78755e-10	Glycan biosynthesis and metabolism
Oxidative phosphorylation	0.0574936	0.0400579	-0.0174357	2.15915e-05	0.0220729	-0.00158009	0.0204928	0.132661	-0.1536	0.0396176	-0.113983	1.30437e-23	0.0694411	-0.0109594	0.0584817	4.76977e-05	Energy metabolism
Pantothenate and CoA biosynthesis	-0.0531779	-0.0297689	0.023409	4.8652e-05	-0.0451549	0.0138394	-0.0313155	0.0052912	-0.027535	0.0111085	-0.0164265	0.0976399	0.1532	-0.0261851	0.127015	3.94634e-21	Cofactors and vitamins metabolism
Pentose and glucuronate interconversions	0.0318461	0.0284538	-0.0033923	0.0205819	0.0636597	-0.00520415	0.0584555	0.000596553	-0.0874134	0.0287666	-0.0586468	7.01788e-08	-0.0113609	0.010187	-0.00117388	0.619801	Carbohydrate metabolism
Pentose phosphate pathway	0.119805	0.0799848	-0.0398203	1.60091e-20	-0.102731	0.0238546	-0.0788765	1.07785e-11	-0.0795062	0.0216651	-0.0578411	3.49948e-08	0.02382	-0.00208311	0.0217369	0.101547	Carbohydrate metabolism
Phenylalanine metabolism	-0.0969495	-0.0635004	0.0334491	3.75239e-13	0.0972741	-0.0209912	0.0762828	2.1731e-10	0.0251933	-0.00696595	0.0182273	0.1276	0.0106566	-0.00309161	0.00756496	0.518146	Amino acid metabolism
Phenylalanine, tyrosine and tryptophan biosynthesis	-0.0725361	-0.0430819	0.0294541	0.00149143	-0.0254404	0.00895422	-0.0164862	0.337724	-0.154547	0.040591	-0.113956	2.65297e-10	0.304658	-0.0573833	0.247275	1.49179e-30	Amino acid metabolism
Phosphonate and phosphinate metabolism	0.209202	0.136407	-0.0727948	1.32682e-28	-0.194181	0.0414405	-0.15274	2.12054e-18	-0.194294	0.0478037	-0.14649	3.83215e-19	0.119533	-0.0225288	0.0970037	3.419e-07	Amino acid metabolism
Porphyrin and chlorophyll metabolism	0.0141491	0.0163721	0.00222307	0.315376	-0.00241553	0.00774157	0.00532605	0.982382	-0.136297	0.0397662	-0.0965305	4.55811e-18	0.136708	-0.0201719	0.116536	1.23828e-15	Cofactors and vitamins metabolism
Primary bile acid biosynthesis	0.0281916	0.0207462	-0.00744537	0.0147551	0.0547719	-0.00872333	0.0460486	0.000187449	-0.0120243	0.00542788	-0.00659644	0.281639	-0.0825046	0.0191045	-0.0634001	3.01801e-08	Lipid metabolism
Propanoate metabolism	0.146833	0.103952	-0.0428807	1.42586e-22	-0.0949109	0.0287745	-0.0661364	1.21328e-07	-0.0884234	0.0303235	-0.0580999	9.28608e-08	-0.012647	0.0117608	-0.000886195	0.513887	Carbohydrate metabolism
Purine metabolism	0.0740809	0.0522657	-0.0218152	1.12388e-21	-0.111088	0.0273555	-0.083733	1.71889e-34	-0.0563197	0.0179118	-0.0384079	1.05143e-10	0.0713623	-0.00983806	0.0615242	5.39906e-15	Nucleotide metabolism
Pyrimidine metabolism	0.158137	0.10869	-0.0494468	3.95591e-39	-0.222823	0.0525673	-0.170255	2.80553e-55	-0.14342	0.0408917	-0.102529	1.26306e-26	0.16402	-0.0262235	0.137796	7.4542e-31	Nucleotide metabolism
Pyruvate metabolism	0.172924	0.117155	-0.055769	5.51929e-38	-0.113575	0.0289892	-0.0845856	9.57836e-13	-0.144583	0.0400942	-0.104489	4.17389e-21	0.0327757	-0.00097818	0.0317975	0.0645991	Carbohydrate metabolism
Retinol metabolism	-0.0529717	-0.0293271	0.0236446	3.26363e-05	0.157696	-0.0276356	0.130061	1.81942e-25	-0.0322325	0.0125381	-0.0196944	0.0316083	-0.048706	0.0146147	-0.0340913	0.00103213	Cofactors and vitamins metabolism
Riboflavin metabolism	-0.111094	-0.0645409	0.0465528	1.23912e-11	0.0518367	-0.00354742	0.0482892	0.00914807	0.00304845	0.00640262	0.00945106	0.899558	0.1023	-0.0133855	0.088914	9.85065e-08	Cofactors and vitamins metabolism
Selenocompound metabolism	0.142738	0.102227	-0.0405113	1.2288e-21	-0.23639	0.0588329	-0.177557	7.37748e-41	-0.0480657	0.0216099	-0.0264558	0.00392074	0.091795	-0.00826809	0.0835269	2.32521e-07	Amino acid metabolism
Sphingolipid metabolism	-0.118422	-0.0747736	0.0436482	7.42803e-23	0.0709424	-0.0129879	0.0579544	6.95044e-07	0.0381198	-0.00747096	0.0306489	0.00417161	0.0535314	-0.00911046	0.0444209	0.000216945	Lipid metabolism
Starch and sucrose metabolism	-0.064252	-0.0353253	0.0289267	9.47769e-09	0.0358843	-0.00126537	0.034619	0.0101196	0.0490503	-0.00557787	0.0434724	8.47139e-05	-0.000441631	0.00621473	0.0057731	0.9386	Carbohydrate metabolism
Steroid biosynthesis	0.155882	0.111082	-0.0448004	4.36679e-19	-0.195294	0.050743	-0.144551	4.29419e-21	0.00995504	0.00814058	0.0180956	0.581909	-0.0346444	0.0174637	-0.0171807	0.0828685	Lipid metabolism
Steroid hormone biosynthesis	-0.0346447	-0.0156766	0.0189681	0.000874391	0.0991265	-0.0137442	0.0853823	4.53094e-17	-0.0239018	0.0123774	-0.0115244	0.0227139	-0.0245669	0.0116008	-0.0129661	0.0375156	Lipid metabolism
Sulfur metabolism	-0.035922	-0.0141364	0.0217856	0.0986209	0.0688808	-0.00514994	0.0637309	0.00897522	-0.0748873	0.0269074	-0.0479799	0.000789728	0.0658868	-0.00417491	0.0617119	0.00364591	Energy metabolism
Synthesis and degradation of ketone bodies	0.105793	0.0654892	-0.0403036	9.9124e-10	0.0224141	-0.0073788	0.0150353	0.404157	-0.0774888	0.0157279	-0.0617608	9.97495e-05	-0.0861222	0.0145094	-0.0716128	6.26623e-05	Lipid metabolism
Taurine and hypotaurine metabolism	-0.0612524	-0.0390937	0.0221587	6.83413e-07	0.0593005	-0.0117922	0.0475083	1.894e-05	0.0492792	-0.011336	0.0379431	0.000305394	-0.0288718	0.00621269	-0.0226591	0.0257965	Amino acid metabolism
TCA cycle	0.146923	0.10431	-0.0426129	3.46203e-19	-0.0643835	0.0227861	-0.0415975	0.001205	-0.173871	0.0510122	-0.122859	3.4577e-21	0.0529102	-0.00108661	0.0518236	0.00856238	Carbohydrate metabolism
Terpenoid backbone biosynthesis	0.173432	0.113499	-0.0599331	3.39195e-27	-0.101811	0.0225824	-0.0792288	9.79488e-08	-0.0848047	0.0218466	-0.0629581	3.80549e-06	-0.0476901	0.011175	-0.036515	0.0092332	others
Thiamine metabolism	0.00742106	0.00157498	-0.00584608	0.7412	0.0832729	-0.0203654	0.0629075	1.67392e-06	-0.105198	0.021889	-0.083309	3.96356e-10	0.0236613	-0.00795776	0.0157035	0.153601	Cofactors and vitamins metabolism
Tryptophan metabolism	-0.0447185	-0.0223323	0.0223862	4.07043e-05	0.0251729	0.00133217	0.026505	0.0576968	-0.0302424	0.0137336	-0.0165088	0.0150991	0.0724452	-0.00801109	0.0644341	2.50112e-08	Amino acid metabolism
Tyrosine metabolism	-0.043482	-0.023112	0.02037	0.000125394	0.0905898	-0.01372	0.0768698	1.13873e-12	-0.0190534	0.00948632	-0.00956705	0.0999046	-0.00873342	0.00669137	-0.00204205	0.395789	Amino acid metabolism
Ubiquinone and other terpenoid-quinone biosynthesis	0.0731397	0.0522393	-0.0209004	4.78033e-05	-0.155612	0.0371073	-0.118504	2.33928e-13	-0.125897	0.0350948	-0.0908025	5.6458e-10	0.196969	-0.0344469	0.162522	6.11311e-20	Cofactors and vitamins metabolism
Valine, leucine and isoleucine biosynthesis	-0.25524	-0.166152	0.0890884	1.15914e-29	0.113161	-0.0247956	0.0883657	1.55611e-05	0.0639428	-0.016744	0.0471988	0.0146901	0.176568	-0.036896	0.139672	5.57434e-11	Amino acid metabolism
Valine, leucine and isoleucine degradation	0.078602	0.0529583	-0.0256437	1.52175e-07	-0.0299491	0.00841806	-0.0215311	0.0594581	-0.0768183	0.0205789	-0.0562394	7.00868e-06	0.00536218	0.00117372	0.0065359	0.679235	Amino acid metabolism
Vitamin B6 metabolism	0.112016	0.0783863	-0.0336293	1.95791e-09	-0.179178	0.0430282	-0.13615	2.89201e-16	-0.0517635	0.0184721	-0.0332914	0.0202025	0.081492	-0.0102221	0.0712699	0.000369777	Cofactors and vitamins metabolism

## Sheet: Supplementary file 1f
id	CCCRC	age (continuous variable)	age (<=65yr, >65yr)	gender	pt	pn	pm	TNM_stage	grade	DFS	DFStime_months	OS	OStime_months	MSI_status	CIMP_subtype	CMS	Tumor_Site	Adjuvant_chemotherapy	kras_mut	braf_mut	alias	dataset	cohort
GSM327282	C1	NA	NA	NA	NA	NA	NA	NA	NA	NA	NA	NA	NA	MSI	NA	UNKNOWN	NA	NA	NA	NA	NA	GSE13067	CRC_AFFY
GSM327283	C1	NA	NA	NA	NA	NA	NA	NA	NA	NA	NA	NA	NA	MSS	NA	UNKNOWN	NA	NA	NA	NA	NA	GSE13067	CRC_AFFY
GSM327284	C1	NA	NA	NA	NA	NA	NA	NA	NA	NA	NA	NA	NA	MSS	NA	CMS2	NA	NA	NA	NA	NA	GSE13067	CRC_AFFY
GSM327285	C1	NA	NA	NA	NA	NA	NA	NA	NA	NA	NA	NA	NA	MSS	NA	CMS2	NA	NA	NA	NA	NA	GSE13067	CRC_AFFY
GSM327286	C2	NA	NA	NA	NA	NA	NA	NA	NA	NA	NA	NA	NA	MSS	NA	CMS3	NA	NA	NA	NA	NA	GSE13067	CRC_AFFY
GSM327287	C1	NA	NA	NA	NA	NA	NA	NA	NA	NA	NA	NA	NA	MSS	NA	UNKNOWN	NA	NA	NA	NA	NA	GSE13067	CRC_AFFY
GSM327288	C3	NA	NA	NA	NA	NA	NA	NA	NA	NA	NA	NA	NA	MSI	NA	CMS4	NA	NA	NA	NA	NA	GSE13067	CRC_AFFY
GSM327289	C3	NA	NA	NA	NA	NA	NA	NA	NA	NA	NA	NA	NA	MSS	NA	CMS4	NA	NA	NA	NA	NA	GSE13067	CRC_AFFY
GSM327290	C1	NA	NA	NA	NA	NA	NA	NA	NA	NA	NA	NA	NA	MSS	NA	CMS2	NA	NA	NA	NA	NA	GSE13067	CRC_AFFY
GSM327291	C2	NA	NA	NA	NA	NA	NA	NA	NA	NA	NA	NA	NA	MSS	NA	CMS4	NA	NA	NA	NA	NA	GSE13067	CRC_AFFY
GSM327292	C1	NA	NA	NA	NA	NA	NA	NA	NA	NA	NA	NA	NA	MSS	NA	UNKNOWN	NA	NA	NA	NA	NA	GSE13067	CRC_AFFY
GSM327293	C3	NA	NA	NA	NA	NA	NA	NA	NA	NA	NA	NA	NA	MSS	NA	CMS1	NA	NA	NA	NA	NA	GSE13067	CRC_AFFY
GSM327294	C1	NA	NA	NA	NA	NA	NA	NA	NA	NA	NA	NA	NA	MSS	NA	UNKNOWN	NA	NA	NA	NA	NA	GSE13067	CRC_AFFY
GSM327295	C1	NA	NA	NA	NA	NA	NA	NA	NA	NA	NA	NA	NA	MSS	NA	UNKNOWN	NA	NA	NA	NA	NA	GSE13067	CRC_AFFY
GSM327296	C1	NA	NA	NA	NA	NA	NA	NA	NA	NA	NA	NA	NA	MSS	NA	UNKNOWN	NA	NA	NA	NA	NA	GSE13067	CRC_AFFY
GSM327297	C2	NA	NA	NA	NA	NA	NA	NA	NA	NA	NA	NA	NA	MSS	NA	CMS4	NA	NA	NA	NA	NA	GSE13067	CRC_AFFY
GSM327298	C2	NA	NA	NA	NA	NA	NA	NA	NA	NA	NA	NA	NA	MSS	NA	CMS3	NA	NA	NA	NA	NA	GSE13067	CRC_AFFY
GSM327299	C1	NA	NA	NA	NA	NA	NA	NA	NA	NA	NA	NA	NA	MSS	NA	UNKNOWN	NA	NA	NA	NA	NA	GSE13067	CRC_AFFY
GSM327300	C2	NA	NA	NA	NA	NA	NA	NA	NA	NA	NA	NA	NA	MSS	NA	CMS3	NA	NA	NA	NA	NA	GSE13067	CRC_AFFY
GSM327301	C4	NA	NA	NA	NA	NA	NA	NA	NA	NA	NA	NA	NA	MSS	NA	UNKNOWN	NA	NA	NA	NA	NA	GSE13067	CRC_AFFY
GSM327302	C3	NA	NA	NA	NA	NA	NA	NA	NA	NA	NA	NA	NA	MSS	NA	CMS1	NA	NA	NA	NA	NA	GSE13067	CRC_AFFY
GSM327303	C3	NA	NA	NA	NA	NA	NA	NA	NA	NA	NA	NA	NA	MSS	NA	CMS4	NA	NA	NA	NA	NA	GSE13067	CRC_AFFY
GSM327304	C4	NA	NA	NA	NA	NA	NA	NA	NA	NA	NA	NA	NA	MSS	NA	UNKNOWN	NA	NA	NA	NA	NA	GSE13067	CRC_AFFY
GSM327305	C1	NA	NA	NA	NA	NA	NA	NA	NA	NA	NA	NA	NA	MSS	NA	CMS3	NA	NA	NA	NA	NA	GSE13067	CRC_AFFY
GSM327306	C1	NA	NA	NA	NA	NA	NA	NA	NA	NA	NA	NA	NA	MSS	NA	CMS2	NA	NA	NA	NA	NA	GSE13067	CRC_AFFY
GSM327307	C4	NA	NA	NA	NA	NA	NA	NA	NA	NA	NA	NA	NA	MSS	NA	UNKNOWN	NA	NA	NA	NA	NA	GSE13067	CRC_AFFY
GSM327308	C1	NA	NA	NA	NA	NA	NA	NA	NA	NA	NA	NA	NA	MSS	NA	CMS2	NA	NA	NA	NA	NA	GSE13067	CRC_AFFY
GSM327309	C4	NA	NA	NA	NA	NA	NA	NA	NA	NA	NA	NA	NA	MSI	NA	CMS1	NA	NA	NA	NA	NA	GSE13067	CRC_AFFY
GSM327310	C1	NA	NA	NA	NA	NA	NA	NA	NA	NA	NA	NA	NA	MSI	NA	CMS1	NA	NA	NA	NA	NA	GSE13067	CRC_AFFY
GSM327311	C1	NA	NA	NA	NA	NA	NA	NA	NA	NA	NA	NA	NA	MSI	NA	CMS1	NA	NA	NA	NA	NA	GSE13067	CRC_AFFY
GSM327312	C1	NA	NA	NA	NA	NA	NA	NA	NA	NA	NA	NA	NA	MSS	NA	CMS3	NA	NA	NA	NA	NA	GSE13067	CRC_AFFY
GSM327313	C4	NA	NA	NA	NA	NA	NA	NA	NA	NA	NA	NA	NA	MSI	NA	CMS1	NA	NA	NA	NA	NA	GSE13067	CRC_AFFY
GSM327314	C2	NA	NA	NA	NA	NA	NA	NA	NA	NA	NA	NA	NA	MSS	NA	CMS2	NA	NA	NA	NA	NA	GSE13067	CRC_AFFY
GSM327315	C3	NA	NA	NA	NA	NA	NA	NA	NA	NA	NA	NA	NA	MSS	NA	CMS4	NA	NA	NA	NA	NA	GSE13067	CRC_AFFY
GSM327316	C4	NA	NA	NA	NA	NA	NA	NA	NA	NA	NA	NA	NA	MSS	NA	UNKNOWN	NA	NA	NA	NA	NA	GSE13067	CRC_AFFY
GSM327317	C3	NA	NA	NA	NA	NA	NA	NA	NA	NA	NA	NA	NA	MSS	NA	CMS4	NA	NA	NA	NA	NA	GSE13067	CRC_AFFY
GSM327318	C1	NA	NA	NA	NA	NA	NA	NA	NA	NA	NA	NA	NA	MSS	NA	CMS2	NA	NA	NA	NA	NA	GSE13067	CRC_AFFY
GSM327319	C1	NA	NA	NA	NA	NA	NA	NA	NA	NA	NA	NA	NA	MSS	NA	CMS2	NA	NA	NA	NA	NA	GSE13067	CRC_AFFY
GSM327320	C3	NA	NA	NA	NA	NA	NA	NA	NA	NA	NA	NA	NA	MSS	NA	CMS2	NA	NA	NA	NA	NA	GSE13067	CRC_AFFY
GSM327321	C3	NA	NA	NA	NA	NA	NA	NA	NA	NA	NA	NA	NA	MSS	NA	CMS2	NA	NA	NA	NA	NA	GSE13067	CRC_AFFY
GSM327322	C1	NA	NA	NA	NA	NA	NA	NA	NA	NA	NA	NA	NA	MSS	NA	CMS4	NA	NA	NA	NA	NA	GSE13067	CRC_AFFY
GSM327323	C1	NA	NA	NA	NA	NA	NA	NA	NA	NA	NA	NA	NA	MSS	NA	CMS2	NA	NA	NA	NA	NA	GSE13067	CRC_AFFY
GSM327324	C1	NA	NA	NA	NA	NA	NA	NA	NA	NA	NA	NA	NA	MSI	NA	UNKNOWN	NA	NA	NA	NA	NA	GSE13067	CRC_AFFY
GSM327325	C4	NA	NA	NA	NA	NA	NA	NA	NA	NA	NA	NA	NA	MSI	NA	CMS1	NA	NA	NA	NA	NA	GSE13067	CRC_AFFY
GSM327326	C1	NA	NA	NA	NA	NA	NA	NA	NA	NA	NA	NA	NA	MSS	NA	CMS2	NA	NA	NA	NA	NA	GSE13067	CRC_AFFY
GSM327327	C2	NA	NA	NA	NA	NA	NA	NA	NA	NA	NA	NA	NA	MSS	NA	CMS4	NA	NA	NA	NA	NA	GSE13067	CRC_AFFY
GSM327328	C3	NA	NA	NA	NA	NA	NA	NA	NA	NA	NA	NA	NA	MSS	NA	CMS4	NA	NA	NA	NA	NA	GSE13067	CRC_AFFY
GSM327329	C2	NA	NA	NA	NA	NA	NA	NA	NA	NA	NA	NA	NA	MSS	NA	UNKNOWN	NA	NA	NA	NA	NA	GSE13067	CRC_AFFY
GSM327330	C2	NA	NA	NA	NA	NA	NA	NA	NA	NA	NA	NA	NA	MSS	NA	CMS4	NA	NA	NA	NA	NA	GSE13067	CRC_AFFY
GSM327331	C3	NA	NA	NA	NA	NA	NA	NA	NA	NA	NA	NA	NA	MSI	NA	CMS1	NA	NA	NA	NA	NA	GSE13067	CRC_AFFY
GSM327332	C3	NA	NA	NA	NA	NA	NA	NA	NA	NA	NA	NA	NA	MSS	NA	CMS3	NA	NA	NA	NA	NA	GSE13067	CRC_AFFY
GSM327333	C2	NA	NA	NA	NA	NA	NA	NA	NA	NA	NA	NA	NA	MSS	NA	CMS4	NA	NA	NA	NA	NA	GSE13067	CRC_AFFY
GSM327334	C4	NA	NA	NA	NA	NA	NA	NA	NA	NA	NA	NA	NA	MSS	NA	UNKNOWN	NA	NA	NA	NA	NA	GSE13067	CRC_AFFY
GSM327335	C1	NA	NA	NA	NA	NA	NA	NA	NA	NA	NA	NA	NA	MSS	NA	CMS3	NA	NA	NA	NA	NA	GSE13067	CRC_AFFY
GSM327336	C3	NA	NA	NA	NA	NA	NA	NA	NA	NA	NA	NA	NA	MSS	NA	CMS3	NA	NA	NA	NA	NA	GSE13067	CRC_AFFY
GSM327337	C1	NA	NA	NA	NA	NA	NA	NA	NA	NA	NA	NA	NA	MSS	NA	CMS2	NA	NA	NA	NA	NA	GSE13067	CRC_AFFY
GSM327338	C1	NA	NA	NA	NA	NA	NA	NA	NA	NA	NA	NA	NA	MSS	NA	CMS2	NA	NA	NA	NA	NA	GSE13067	CRC_AFFY
GSM327339	C3	NA	NA	NA	NA	NA	NA	NA	NA	NA	NA	NA	NA	MSS	NA	CMS4	NA	NA	NA	NA	NA	GSE13067	CRC_AFFY
GSM327340	C4	NA	NA	NA	NA	NA	NA	NA	NA	NA	NA	NA	NA	MSS	NA	CMS2	NA	NA	NA	NA	NA	GSE13067	CRC_AFFY
GSM327341	C2	NA	NA	NA	NA	NA	NA	NA	NA	NA	NA	NA	NA	MSS	NA	UNKNOWN	NA	NA	NA	NA	NA	GSE13067	CRC_AFFY
GSM327342	C1	NA	NA	NA	NA	NA	NA	NA	NA	NA	NA	NA	NA	MSS	NA	UNKNOWN	NA	NA	NA	NA	NA	GSE13067	CRC_AFFY
GSM327343	C2	NA	NA	NA	NA	NA	NA	NA	NA	NA	NA	NA	NA	MSS	NA	CMS3	NA	NA	NA	NA	NA	GSE13067	CRC_AFFY
GSM327344	C3	NA	NA	NA	NA	NA	NA	NA	NA	NA	NA	NA	NA	MSS	NA	CMS4	NA	NA	NA	NA	NA	GSE13067	CRC_AFFY
GSM327345	C4	NA	NA	NA	NA	NA	NA	NA	NA	NA	NA	NA	NA	MSS	NA	CMS4	NA	NA	NA	NA	NA	GSE13067	CRC_AFFY
GSM327346	C1	NA	NA	NA	NA	NA	NA	NA	NA	NA	NA	NA	NA	MSS	NA	CMS3	NA	NA	NA	NA	NA	GSE13067	CRC_AFFY
GSM327347	C3	NA	NA	NA	NA	NA	NA	NA	NA	NA	NA	NA	NA	MSS	NA	CMS3	NA	NA	NA	NA	NA	GSE13067	CRC_AFFY
GSM327348	C3	NA	NA	NA	NA	NA	NA	NA	NA	NA	NA	NA	NA	MSS	NA	CMS4	NA	NA	NA	NA	NA	GSE13067	CRC_AFFY
GSM327349	C2	NA	NA	NA	NA	NA	NA	NA	NA	NA	NA	NA	NA	MSS	NA	CMS3	NA	NA	NA	NA	NA	GSE13067	CRC_AFFY
GSM327350	C1	NA	NA	NA	NA	NA	NA	NA	NA	NA	NA	NA	NA	MSS	NA	CMS2	NA	NA	NA	NA	NA	GSE13067	CRC_AFFY
GSM327351	C3	NA	NA	NA	NA	NA	NA	NA	NA	NA	NA	NA	NA	MSS	NA	CMS4	NA	NA	NA	NA	NA	GSE13067	CRC_AFFY
GSM327352	C4	NA	NA	NA	NA	NA	NA	NA	NA	NA	NA	NA	NA	MSI	NA	CMS1	NA	NA	NA	NA	NA	GSE13067	CRC_AFFY
GSM327353	C1	NA	NA	NA	NA	NA	NA	NA	NA	NA	NA	NA	NA	MSI	NA	CMS3	NA	NA	NA	NA	NA	GSE13067	CRC_AFFY
GSM327354	C2	NA	NA	NA	NA	NA	NA	NA	NA	NA	NA	NA	NA	MSS	NA	CMS2	NA	NA	NA	NA	NA	GSE13067	CRC_AFFY
GSM327355	C4	NA	NA	NA	NA	NA	NA	NA	NA	NA	NA	NA	NA	MSS	NA	UNKNOWN	NA	NA	NA	NA	NA	GSE13067	CRC_AFFY
GSM335510	C1	NA	NA	NA	NA	NA	NA	NA	NA	NA	NA	NA	NA	MSS	NA	UNKNOWN	NA	NA	NA	NA	NA	GSE13294	CRC_AFFY
GSM335511	C2	NA	NA	NA	NA	NA	NA	NA	NA	NA	NA	NA	NA	MSI	NA	CMS3	NA	NA	NA	NA	NA	GSE13294	CRC_AFFY
GSM335512	C3	NA	NA	NA	NA	NA	NA	NA	NA	NA	NA	NA	NA	MSS	NA	CMS4	NA	NA	NA	NA	NA	GSE13294	CRC_AFFY
GSM335513	C2	NA	NA	NA	NA	NA	NA	NA	NA	NA	NA	NA	NA	MSS	NA	CMS2	NA	NA	NA	NA	NA	GSE13294	CRC_AFFY
GSM335514	C3	NA	NA	NA	NA	NA	NA	NA	NA	NA	NA	NA	NA	MSS	NA	CMS4	NA	NA	NA	NA	NA	GSE13294	CRC_AFFY
GSM335515	C1	NA	NA	NA	NA	NA	NA	NA	NA	NA	NA	NA	NA	MSS	NA	CMS4	NA	NA	NA	NA	NA	GSE13294	CRC_AFFY
GSM335516	C3	NA	NA	NA	NA	NA	NA	NA	NA	NA	NA	NA	NA	MSS	NA	CMS2	NA	NA	NA	NA	NA	GSE13294	CRC_AFFY
GSM335517	C1	NA	NA	NA	NA	NA	NA	NA	NA	NA	NA	NA	NA	MSS	NA	CMS2	NA	NA	NA	NA	NA	GSE13294	CRC_AFFY
GSM335518	C2	NA	NA	NA	NA	NA	NA	NA	NA	NA	NA	NA	NA	MSI	NA	CMS1	NA	NA	NA	NA	NA	GSE13294	CRC_AFFY
GSM335519	C2	NA	NA	NA	NA	NA	NA	NA	NA	NA	NA	NA	NA	MSI	NA	CMS4	NA	NA	NA	NA	NA	GSE13294	CRC_AFFY
GSM335520	C2	NA	NA	NA	NA	NA	NA	NA	NA	NA	NA	NA	NA	MSS	NA	CMS4	NA	NA	NA	NA	NA	GSE13294	CRC_AFFY
GSM335521	C3	NA	NA	NA	NA	NA	NA	NA	NA	NA	NA	NA	NA	MSS	NA	CMS4	NA	NA	NA	NA	NA	GSE13294	CRC_AFFY
GSM335522	C1	NA	NA	NA	NA	NA	NA	NA	NA	NA	NA	NA	NA	MSS	NA	CMS2	NA	NA	NA	NA	NA	GSE13294	CRC_AFFY
GSM335523	C2	NA	NA	NA	NA	NA	NA	NA	NA	NA	NA	NA	NA	MSS	NA	CMS3	NA	NA	NA	NA	NA	GSE13294	CRC_AFFY
GSM335524	C2	NA	NA	NA	NA	NA	NA	NA	NA	NA	NA	NA	NA	MSS	NA	CMS4	NA	NA	NA	NA	NA	GSE13294	CRC_AFFY
GSM335525	C2	NA	NA	NA	NA	NA	NA	NA	NA	NA	NA	NA	NA	MSI	NA	CMS3	NA	NA	NA	NA	NA	GSE13294	CRC_AFFY
GSM335526	C3	NA	NA	NA	NA	NA	NA	NA	NA	NA	NA	NA	NA	MSS	NA	CMS4	NA	NA	NA	NA	NA	GSE13294	CRC_AFFY
GSM335527	C3	NA	NA	NA	NA	NA	NA	NA	NA	NA	NA	NA	NA	MSI	NA	CMS4	NA	NA	NA	NA	NA	GSE13294	CRC_AFFY
GSM335528	C2	NA	NA	NA	NA	NA	NA	NA	NA	NA	NA	NA	NA	MSS	NA	CMS3	NA	NA	NA	NA	NA	GSE13294	CRC_AFFY
GSM335529	C3	NA	NA	NA	NA	NA	NA	NA	NA	NA	NA	NA	NA	MSI	NA	CMS3	NA	NA	NA	NA	NA	GSE13294	CRC_AFFY
GSM335530	C2	NA	NA	NA	NA	NA	NA	NA	NA	NA	NA	NA	NA	MSI	NA	CMS1	NA	NA	NA	NA	NA	GSE13294	CRC_AFFY
GSM335531	C1	NA	NA	NA	NA	NA	NA	NA	NA	NA	NA	NA	NA	MSS	NA	CMS2	NA	NA	NA	NA	NA	GSE13294	CRC_AFFY
GSM335532	C3	NA	NA	NA	NA	NA	NA	NA	NA	NA	NA	NA	NA	MSI	NA	CMS1	NA	NA	NA	NA	NA	GSE13294	CRC_AFFY
GSM335533	C3	NA	NA	NA	NA	NA	NA	NA	NA	NA	NA	NA	NA	MSS	NA	CMS4	NA	NA	NA	NA	NA	GSE13294	CRC_AFFY
GSM335534	C2	NA	NA	NA	NA	NA	NA	NA	NA	NA	NA	NA	NA	MSS	NA	CMS2	NA	NA	NA	NA	NA	GSE13294	CRC_AFFY
GSM335535	C2	NA	NA	NA	NA	NA	NA	NA	NA	NA	NA	NA	NA	MSS	NA	CMS4	NA	NA	NA	NA	NA	GSE13294	CRC_AFFY
GSM335536	C3	NA	NA	NA	NA	NA	NA	NA	NA	NA	NA	NA	NA	MSS	NA	CMS4	NA	NA	NA	NA	NA	GSE13294	CRC_AFFY
GSM335537	C1	NA	NA	NA	NA	NA	NA	NA	NA	NA	NA	NA	NA	MSS	NA	CMS2	NA	NA	NA	NA	NA	GSE13294	CRC_AFFY
GSM335538	C3	NA	NA	NA	NA	NA	NA	NA	NA	NA	NA	NA	NA	MSS	NA	CMS4	NA	NA	NA	NA	NA	GSE13294	CRC_AFFY
GSM335539	C3	NA	NA	NA	NA	NA	NA	NA	NA	NA	NA	NA	NA	MSS	NA	CMS4	NA	NA	NA	NA	NA	GSE13294	CRC_AFFY
GSM335540	C2	NA	NA	NA	NA	NA	NA	NA	NA	NA	NA	NA	NA	MSS	NA	CMS2	NA	NA	NA	NA	NA	GSE13294	CRC_AFFY
GSM335541	C2	NA	NA	NA	NA	NA	NA	NA	NA	NA	NA	NA	NA	MSI	NA	CMS1	NA	NA	NA	NA	NA	GSE13294	CRC_AFFY
GSM335542	C2	NA	NA	NA	NA	NA	NA	NA	NA	NA	NA	NA	NA	MSI	NA	CMS4	NA	NA	NA	NA	NA	GSE13294	CRC_AFFY
GSM335543	C2	NA	NA	NA	NA	NA	NA	NA	NA	NA	NA	NA	NA	MSI	NA	CMS4	NA	NA	NA	NA	NA	GSE13294	CRC_AFFY
GSM335544	C3	NA	NA	NA	NA	NA	NA	NA	NA	NA	NA	NA	NA	MSI	NA	CMS3	NA	NA	NA	NA	NA	GSE13294	CRC_AFFY
GSM335545	C2	NA	NA	NA	NA	NA	NA	NA	NA	NA	NA	NA	NA	MSI	NA	CMS4	NA	NA	NA	NA	NA	GSE13294	CRC_AFFY
GSM335546	C3	NA	NA	NA	NA	NA	NA	NA	NA	NA	NA	NA	NA	MSI	NA	CMS4	NA	NA	NA	NA	NA	GSE13294	CRC_AFFY
GSM335547	C4	NA	NA	NA	NA	NA	NA	NA	NA	NA	NA	NA	NA	MSS	NA	UNKNOWN	NA	NA	NA	NA	NA	GSE13294	CRC_AFFY
GSM335548	C1	NA	NA	NA	NA	NA	NA	NA	NA	NA	NA	NA	NA	MSS	NA	UNKNOWN	NA	NA	NA	NA	NA	GSE13294	CRC_AFFY
GSM335549	C1	NA	NA	NA	NA	NA	NA	NA	NA	NA	NA	NA	NA	MSS	NA	CMS2	NA	NA	NA	NA	NA	GSE13294	CRC_AFFY
GSM335550	C1	NA	NA	NA	NA	NA	NA	NA	NA	NA	NA	NA	NA	MSS	NA	CMS3	NA	NA	NA	NA	NA	GSE13294	CRC_AFFY
GSM335551	C1	NA	NA	NA	NA	NA	NA	NA	NA	NA	NA	NA	NA	MSI	NA	CMS4	NA	NA	NA	NA	NA	GSE13294	CRC_AFFY
GSM335552	C3	NA	NA	NA	NA	NA	NA	NA	NA	NA	NA	NA	NA	MSS	NA	CMS4	NA	NA	NA	NA	NA	GSE13294	CRC_AFFY
GSM335553	C2	NA	NA	NA	NA	NA	NA	NA	NA	NA	NA	NA	NA	MSS	NA	CMS2	NA	NA	NA	NA	NA	GSE13294	CRC_AFFY
GSM335554	C1	NA	NA	NA	NA	NA	NA	NA	NA	NA	NA	NA	NA	MSS	NA	CMS2	NA	NA	NA	NA	NA	GSE13294	CRC_AFFY
GSM335555	C4	NA	NA	NA	NA	NA	NA	NA	NA	NA	NA	NA	NA	MSI	NA	UNKNOWN	NA	NA	NA	NA	NA	GSE13294	CRC_AFFY
GSM335556	C1	NA	NA	NA	NA	NA	NA	NA	NA	NA	NA	NA	NA	MSS	NA	CMS2	NA	NA	NA	NA	NA	GSE13294	CRC_AFFY
GSM335557	C1	NA	NA	NA	NA	NA	NA	NA	NA	NA	NA	NA	NA	MSS	NA	CMS2	NA	NA	NA	NA	NA	GSE13294	CRC_AFFY
GSM335558	C1	NA	NA	NA	NA	NA	NA	NA	NA	NA	NA	NA	NA	MSS	NA	CMS2	NA	NA	NA	NA	NA	GSE13294	CRC_AFFY
GSM335559	C2	NA	NA	NA	NA	NA	NA	NA	NA	NA	NA	NA	NA	MSI	NA	CMS1	NA	NA	NA	NA	NA	GSE13294	CRC_AFFY
GSM335560	C4	NA	NA	NA	NA	NA	NA	NA	NA	NA	NA	NA	NA	MSI	NA	CMS1	NA	NA	NA	NA	NA	GSE13294	CRC_AFFY
GSM335561	C1	NA	NA	NA	NA	NA	NA	NA	NA	NA	NA	NA	NA	MSS	NA	CMS2	NA	NA	NA	NA	NA	GSE13294	CRC_AFFY
GSM335562	C4	NA	NA	NA	NA	NA	NA	NA	NA	NA	NA	NA	NA	MSI	NA	UNKNOWN	NA	NA	NA	NA	NA	GSE13294	CRC_AFFY
GSM335563	C3	NA	NA	NA	NA	NA	NA	NA	NA	NA	NA	NA	NA	MSI	NA	CMS4	NA	NA	NA	NA	NA	GSE13294	CRC_AFFY
GSM335564	C3	NA	NA	NA	NA	NA	NA	NA	NA	NA	NA	NA	NA	MSS	NA	CMS4	NA	NA	NA	NA	NA	GSE13294	CRC_AFFY
GSM335565	C4	NA	NA	NA	NA	NA	NA	NA	NA	NA	NA	NA	NA	MSI	NA	CMS1	NA	NA	NA	NA	NA	GSE13294	CRC_AFFY
GSM335566	C4	NA	NA	NA	NA	NA	NA	NA	NA	NA	NA	NA	NA	MSI	NA	CMS1	NA	NA	NA	NA	NA	GSE13294	CRC_AFFY
GSM335567	C1	NA	NA	NA	NA	NA	NA	NA	NA	NA	NA	NA	NA	MSS	NA	CMS2	NA	NA	NA	NA	NA	GSE13294	CRC_AFFY
GSM335568	C3	NA	NA	NA	NA	NA	NA	NA	NA	NA	NA	NA	NA	MSS	NA	CMS2	NA	NA	NA	NA	NA	GSE13294	CRC_AFFY
GSM335569	C1	NA	NA	NA	NA	NA	NA	NA	NA	NA	NA	NA	NA	MSS	NA	CMS2	NA	NA	NA	NA	NA	GSE13294	CRC_AFFY
GSM335570	C1	NA	NA	NA	NA	NA	NA	NA	NA	NA	NA	NA	NA	MSS	NA	CMS1	NA	NA	NA	NA	NA	GSE13294	CRC_AFFY
GSM335571	C1	NA	NA	NA	NA	NA	NA	NA	NA	NA	NA	NA	NA	MSS	NA	CMS2	NA	NA	NA	NA	NA	GSE13294	CRC_AFFY
GSM335572	C1	NA	NA	NA	NA	NA	NA	NA	NA	NA	NA	NA	NA	MSS	NA	CMS3	NA	NA	NA	NA	NA	GSE13294	CRC_AFFY
GSM335573	C1	NA	NA	NA	NA	NA	NA	NA	NA	NA	NA	NA	NA	MSI	NA	UNKNOWN	NA	NA	NA	NA	NA	GSE13294	CRC_AFFY
GSM335574	C4	NA	NA	NA	NA	NA	NA	NA	NA	NA	NA	NA	NA	MSI	NA	CMS1	NA	NA	NA	NA	NA	GSE13294	CRC_AFFY
GSM335575	C1	NA	NA	NA	NA	NA	NA	NA	NA	NA	NA	NA	NA	MSS	NA	CMS4	NA	NA	NA	NA	NA	GSE13294	CRC_AFFY
GSM335576	C4	NA	NA	NA	NA	NA	NA	NA	NA	NA	NA	NA	NA	MSI	NA	CMS1	NA	NA	NA	NA	NA	GSE13294	CRC_AFFY
GSM335577	C1	NA	NA	NA	NA	NA	NA	NA	NA	NA	NA	NA	NA	MSI	NA	CMS1	NA	NA	NA	NA	NA	GSE13294	CRC_AFFY
GSM335578	C1	NA	NA	NA	NA	NA	NA	NA	NA	NA	NA	NA	NA	MSI	NA	CMS2	NA	NA	NA	NA	NA	GSE13294	CRC_AFFY
GSM335579	C1	NA	NA	NA	NA	NA	NA	NA	NA	NA	NA	NA	NA	MSS	NA	CMS3	NA	NA	NA	NA	NA	GSE13294	CRC_AFFY
GSM335580	C3	NA	NA	NA	NA	NA	NA	NA	NA	NA	NA	NA	NA	MSS	NA	CMS4	NA	NA	NA	NA	NA	GSE13294	CRC_AFFY
GSM335581	C3	NA	NA	NA	NA	NA	NA	NA	NA	NA	NA	NA	NA	MSS	NA	CMS3	NA	NA	NA	NA	NA	GSE13294	CRC_AFFY
GSM335582	C1	NA	NA	NA	NA	NA	NA	NA	NA	NA	NA	NA	NA	MSS	NA	CMS2	NA	NA	NA	NA	NA	GSE13294	CRC_AFFY
GSM335583	C1	NA	NA	NA	NA	NA	NA	NA	NA	NA	NA	NA	NA	MSS	NA	CMS2	NA	NA	NA	NA	NA	GSE13294	CRC_AFFY
GSM335584	C1	NA	NA	NA	NA	NA	NA	NA	NA	NA	NA	NA	NA	MSS	NA	UNKNOWN	NA	NA	NA	NA	NA	GSE13294	CRC_AFFY
GSM335585	C4	NA	NA	NA	NA	NA	NA	NA	NA	NA	NA	NA	NA	MSI	NA	CMS1	NA	NA	NA	NA	NA	GSE13294	CRC_AFFY
GSM335586	C2	NA	NA	NA	NA	NA	NA	NA	NA	NA	NA	NA	NA	MSS	NA	CMS3	NA	NA	NA	NA	NA	GSE13294	CRC_AFFY
GSM335587	C4	NA	NA	NA	NA	NA	NA	NA	NA	NA	NA	NA	NA	MSS	NA	CMS3	NA	NA	NA	NA	NA	GSE13294	CRC_AFFY
GSM335588	C3	NA	NA	NA	NA	NA	NA	NA	NA	NA	NA	NA	NA	MSS	NA	CMS4	NA	NA	NA	NA	NA	GSE13294	CRC_AFFY
GSM335589	C2	NA	NA	NA	NA	NA	NA	NA	NA	NA	NA	NA	NA	MSS	NA	CMS2	NA	NA	NA	NA	NA	GSE13294	CRC_AFFY
GSM335590	C2	NA	NA	NA	NA	NA	NA	NA	NA	NA	NA	NA	NA	MSS	NA	CMS4	NA	NA	NA	NA	NA	GSE13294	CRC_AFFY
GSM335591	C1	NA	NA	NA	NA	NA	NA	NA	NA	NA	NA	NA	NA	MSS	NA	CMS2	NA	NA	NA	NA	NA	GSE13294	CRC_AFFY
GSM335592	C1	NA	NA	NA	NA	NA	NA	NA	NA	NA	NA	NA	NA	MSS	NA	CMS2	NA	NA	NA	NA	NA	GSE13294	CRC_AFFY
GSM335593	C1	NA	NA	NA	NA	NA	NA	NA	NA	NA	NA	NA	NA	MSS	NA	CMS3	NA	NA	NA	NA	NA	GSE13294	CRC_AFFY
GSM335594	C1	NA	NA	NA	NA	NA	NA	NA	NA	NA	NA	NA	NA	MSS	NA	CMS2	NA	NA	NA	NA	NA	GSE13294	CRC_AFFY
GSM335595	C2	NA	NA	NA	NA	NA	NA	NA	NA	NA	NA	NA	NA	MSI	NA	UNKNOWN	NA	NA	NA	NA	NA	GSE13294	CRC_AFFY
GSM335596	C4	NA	NA	NA	NA	NA	NA	NA	NA	NA	NA	NA	NA	MSS	NA	CMS2	NA	NA	NA	NA	NA	GSE13294	CRC_AFFY
GSM335597	C4	NA	NA	NA	NA	NA	NA	NA	NA	NA	NA	NA	NA	MSI	NA	CMS1	NA	NA	NA	NA	NA	GSE13294	CRC_AFFY
GSM335598	C3	NA	NA	NA	NA	NA	NA	NA	NA	NA	NA	NA	NA	MSS	NA	CMS4	NA	NA	NA	NA	NA	GSE13294	CRC_AFFY
GSM335599	C1	NA	NA	NA	NA	NA	NA	NA	NA	NA	NA	NA	NA	MSS	NA	UNKNOWN	NA	NA	NA	NA	NA	GSE13294	CRC_AFFY
GSM335600	C3	NA	NA	NA	NA	NA	NA	NA	NA	NA	NA	NA	NA	MSS	NA	CMS2	NA	NA	NA	NA	NA	GSE13294	CRC_AFFY
GSM335601	C1	NA	NA	NA	NA	NA	NA	NA	NA	NA	NA	NA	NA	MSS	NA	CMS2	NA	NA	NA	NA	NA	GSE13294	CRC_AFFY
GSM335602	C1	NA	NA	NA	NA	NA	NA	NA	NA	NA	NA	NA	NA	MSS	NA	CMS2	NA	NA	NA	NA	NA	GSE13294	CRC_AFFY
GSM335603	C2	NA	NA	NA	NA	NA	NA	NA	NA	NA	NA	NA	NA	MSS	NA	CMS2	NA	NA	NA	NA	NA	GSE13294	CRC_AFFY
GSM335604	C3	NA	NA	NA	NA	NA	NA	NA	NA	NA	NA	NA	NA	MSS	NA	CMS4	NA	NA	NA	NA	NA	GSE13294	CRC_AFFY
GSM335605	C1	NA	NA	NA	NA	NA	NA	NA	NA	NA	NA	NA	NA	MSS	NA	CMS2	NA	NA	NA	NA	NA	GSE13294	CRC_AFFY
GSM335606	C3	NA	NA	NA	NA	NA	NA	NA	NA	NA	NA	NA	NA	MSS	NA	CMS4	NA	NA	NA	NA	NA	GSE13294	CRC_AFFY
GSM335607	C2	NA	NA	NA	NA	NA	NA	NA	NA	NA	NA	NA	NA	MSS	NA	CMS3	NA	NA	NA	NA	NA	GSE13294	CRC_AFFY
GSM335608	C2	NA	NA	NA	NA	NA	NA	NA	NA	NA	NA	NA	NA	MSS	NA	CMS1	NA	NA	NA	NA	NA	GSE13294	CRC_AFFY
GSM335609	C1	NA	NA	NA	NA	NA	NA	NA	NA	NA	NA	NA	NA	MSS	NA	UNKNOWN	NA	NA	NA	NA	NA	GSE13294	CRC_AFFY
GSM335610	C3	NA	NA	NA	NA	NA	NA	NA	NA	NA	NA	NA	NA	MSS	NA	CMS2	NA	NA	NA	NA	NA	GSE13294	CRC_AFFY
GSM335611	C2	NA	NA	NA	NA	NA	NA	NA	NA	NA	NA	NA	NA	MSS	NA	CMS3	NA	NA	NA	NA	NA	GSE13294	CRC_AFFY
GSM335612	C2	NA	NA	NA	NA	NA	NA	NA	NA	NA	NA	NA	NA	MSS	NA	CMS2	NA	NA	NA	NA	NA	GSE13294	CRC_AFFY
GSM335613	C3	NA	NA	NA	NA	NA	NA	NA	NA	NA	NA	NA	NA	MSS	NA	CMS2	NA	NA	NA	NA	NA	GSE13294	CRC_AFFY
GSM335614	C4	NA	NA	NA	NA	NA	NA	NA	NA	NA	NA	NA	NA	MSI	NA	CMS1	NA	NA	NA	NA	NA	GSE13294	CRC_AFFY
GSM335615	C1	NA	NA	NA	NA	NA	NA	NA	NA	NA	NA	NA	NA	MSS	NA	CMS2	NA	NA	NA	NA	NA	GSE13294	CRC_AFFY
GSM335616	C1	NA	NA	NA	NA	NA	NA	NA	NA	NA	NA	NA	NA	MSS	NA	CMS2	NA	NA	NA	NA	NA	GSE13294	CRC_AFFY
GSM335617	C3	NA	NA	NA	NA	NA	NA	NA	NA	NA	NA	NA	NA	MSS	NA	CMS4	NA	NA	NA	NA	NA	GSE13294	CRC_AFFY
GSM335618	C3	NA	NA	NA	NA	NA	NA	NA	NA	NA	NA	NA	NA	MSI	NA	CMS2	NA	NA	NA	NA	NA	GSE13294	CRC_AFFY
GSM335619	C4	NA	NA	NA	NA	NA	NA	NA	NA	NA	NA	NA	NA	MSI	NA	CMS1	NA	NA	NA	NA	NA	GSE13294	CRC_AFFY
GSM335620	C2	NA	NA	NA	NA	NA	NA	NA	NA	NA	NA	NA	NA	MSI	NA	CMS4	NA	NA	NA	NA	NA	GSE13294	CRC_AFFY
GSM335621	C4	NA	NA	NA	NA	NA	NA	NA	NA	NA	NA	NA	NA	MSI	NA	CMS1	NA	NA	NA	NA	NA	GSE13294	CRC_AFFY
GSM335622	C4	NA	NA	NA	NA	NA	NA	NA	NA	NA	NA	NA	NA	MSI	NA	CMS1	NA	NA	NA	NA	NA	GSE13294	CRC_AFFY
GSM335623	C4	NA	NA	NA	NA	NA	NA	NA	NA	NA	NA	NA	NA	MSI	NA	CMS1	NA	NA	NA	NA	NA	GSE13294	CRC_AFFY
GSM335624	C4	NA	NA	NA	NA	NA	NA	NA	NA	NA	NA	NA	NA	MSI	NA	CMS3	NA	NA	NA	NA	NA	GSE13294	CRC_AFFY
GSM335625	C1	NA	NA	NA	NA	NA	NA	NA	NA	NA	NA	NA	NA	MSI	NA	UNKNOWN	NA	NA	NA	NA	NA	GSE13294	CRC_AFFY
GSM335626	C1	NA	NA	NA	NA	NA	NA	NA	NA	NA	NA	NA	NA	MSI	NA	UNKNOWN	NA	NA	NA	NA	NA	GSE13294	CRC_AFFY
GSM335627	C3	NA	NA	NA	NA	NA	NA	NA	NA	NA	NA	NA	NA	MSI	NA	CMS3	NA	NA	NA	NA	NA	GSE13294	CRC_AFFY
GSM335628	C1	NA	NA	NA	NA	NA	NA	NA	NA	NA	NA	NA	NA	MSI	NA	UNKNOWN	NA	NA	NA	NA	NA	GSE13294	CRC_AFFY
GSM335629	C2	NA	NA	NA	NA	NA	NA	NA	NA	NA	NA	NA	NA	MSI	NA	CMS4	NA	NA	NA	NA	NA	GSE13294	CRC_AFFY
GSM335630	C1	NA	NA	NA	NA	NA	NA	NA	NA	NA	NA	NA	NA	MSI	NA	CMS1	NA	NA	NA	NA	NA	GSE13294	CRC_AFFY
GSM335631	C1	NA	NA	NA	NA	NA	NA	NA	NA	NA	NA	NA	NA	MSI	NA	CMS2	NA	NA	NA	NA	NA	GSE13294	CRC_AFFY
GSM335632	C4	NA	NA	NA	NA	NA	NA	NA	NA	NA	NA	NA	NA	MSI	NA	CMS3	NA	NA	NA	NA	NA	GSE13294	CRC_AFFY
GSM335633	C2	NA	NA	NA	NA	NA	NA	NA	NA	NA	NA	NA	NA	MSI	NA	CMS4	NA	NA	NA	NA	NA	GSE13294	CRC_AFFY
GSM335634	C3	NA	NA	NA	NA	NA	NA	NA	NA	NA	NA	NA	NA	MSI	NA	CMS1	NA	NA	NA	NA	NA	GSE13294	CRC_AFFY
GSM335635	C4	NA	NA	NA	NA	NA	NA	NA	NA	NA	NA	NA	NA	MSI	NA	CMS1	NA	NA	NA	NA	NA	GSE13294	CRC_AFFY
GSM335636	C1	NA	NA	NA	NA	NA	NA	NA	NA	NA	NA	NA	NA	MSI	NA	CMS2	NA	NA	NA	NA	NA	GSE13294	CRC_AFFY
GSM335637	C2	NA	NA	NA	NA	NA	NA	NA	NA	NA	NA	NA	NA	MSI	NA	CMS4	NA	NA	NA	NA	NA	GSE13294	CRC_AFFY
GSM335638	C1	NA	NA	NA	NA	NA	NA	NA	NA	NA	NA	NA	NA	MSI	NA	UNKNOWN	NA	NA	NA	NA	NA	GSE13294	CRC_AFFY
GSM335639	C1	NA	NA	NA	NA	NA	NA	NA	NA	NA	NA	NA	NA	MSI	NA	UNKNOWN	NA	NA	NA	NA	NA	GSE13294	CRC_AFFY
GSM335640	C3	NA	NA	NA	NA	NA	NA	NA	NA	NA	NA	NA	NA	MSI	NA	CMS1	NA	NA	NA	NA	NA	GSE13294	CRC_AFFY
GSM335641	C4	NA	NA	NA	NA	NA	NA	NA	NA	NA	NA	NA	NA	MSI	NA	CMS1	NA	NA	NA	NA	NA	GSE13294	CRC_AFFY
GSM335642	C4	NA	NA	NA	NA	NA	NA	NA	NA	NA	NA	NA	NA	MSI	NA	UNKNOWN	NA	NA	NA	NA	NA	GSE13294	CRC_AFFY
GSM335643	C4	NA	NA	NA	NA	NA	NA	NA	NA	NA	NA	NA	NA	MSI	NA	CMS1	NA	NA	NA	NA	NA	GSE13294	CRC_AFFY
GSM335644	C4	NA	NA	NA	NA	NA	NA	NA	NA	NA	NA	NA	NA	MSI	NA	CMS1	NA	NA	NA	NA	NA	GSE13294	CRC_AFFY
GSM335645	C4	NA	NA	NA	NA	NA	NA	NA	NA	NA	NA	NA	NA	MSI	NA	CMS1	NA	NA	NA	NA	NA	GSE13294	CRC_AFFY
GSM335646	C1	NA	NA	NA	NA	NA	NA	NA	NA	NA	NA	NA	NA	MSI	NA	CMS3	NA	NA	NA	NA	NA	GSE13294	CRC_AFFY
GSM335647	C4	NA	NA	NA	NA	NA	NA	NA	NA	NA	NA	NA	NA	MSI	NA	UNKNOWN	NA	NA	NA	NA	NA	GSE13294	CRC_AFFY
GSM335648	C1	NA	NA	NA	NA	NA	NA	NA	NA	NA	NA	NA	NA	MSI	NA	CMS2	NA	NA	NA	NA	NA	GSE13294	CRC_AFFY
GSM335649	C4	NA	NA	NA	NA	NA	NA	NA	NA	NA	NA	NA	NA	MSI	NA	CMS1	NA	NA	NA	NA	NA	GSE13294	CRC_AFFY
GSM335650	C4	NA	NA	NA	NA	NA	NA	NA	NA	NA	NA	NA	NA	MSI	NA	UNKNOWN	NA	NA	NA	NA	NA	GSE13294	CRC_AFFY
GSM335651	C1	NA	NA	NA	NA	NA	NA	NA	NA	NA	NA	NA	NA	MSI	NA	CMS2	NA	NA	NA	NA	NA	GSE13294	CRC_AFFY
GSM335652	C4	NA	NA	NA	NA	NA	NA	NA	NA	NA	NA	NA	NA	MSI	NA	CMS1	NA	NA	NA	NA	NA	GSE13294	CRC_AFFY
GSM335653	C4	NA	NA	NA	NA	NA	NA	NA	NA	NA	NA	NA	NA	MSI	NA	CMS3	NA	NA	NA	NA	NA	GSE13294	CRC_AFFY
GSM335654	C3	NA	NA	NA	NA	NA	NA	NA	NA	NA	NA	NA	NA	MSI	NA	CMS4	NA	NA	NA	NA	NA	GSE13294	CRC_AFFY
GSM335655	C4	NA	NA	NA	NA	NA	NA	NA	NA	NA	NA	NA	NA	MSI	NA	CMS1	NA	NA	NA	NA	NA	GSE13294	CRC_AFFY
GSM335656	C4	NA	NA	NA	NA	NA	NA	NA	NA	NA	NA	NA	NA	MSI	NA	UNKNOWN	NA	NA	NA	NA	NA	GSE13294	CRC_AFFY
GSM335657	C4	NA	NA	NA	NA	NA	NA	NA	NA	NA	NA	NA	NA	MSI	NA	CMS1	NA	NA	NA	NA	NA	GSE13294	CRC_AFFY
GSM335658	C4	NA	NA	NA	NA	NA	NA	NA	NA	NA	NA	NA	NA	MSI	NA	CMS4	NA	NA	NA	NA	NA	GSE13294	CRC_AFFY
GSM335659	C4	NA	NA	NA	NA	NA	NA	NA	NA	NA	NA	NA	NA	MSI	NA	CMS1	NA	NA	NA	NA	NA	GSE13294	CRC_AFFY
GSM335660	C3	NA	NA	NA	NA	NA	NA	NA	NA	NA	NA	NA	NA	MSI	NA	CMS3	NA	NA	NA	NA	NA	GSE13294	CRC_AFFY
GSM335661	C4	NA	NA	NA	NA	NA	NA	NA	NA	NA	NA	NA	NA	MSI	NA	UNKNOWN	NA	NA	NA	NA	NA	GSE13294	CRC_AFFY
GSM335662	C3	NA	NA	NA	NA	NA	NA	NA	NA	NA	NA	NA	NA	MSI	NA	CMS3	NA	NA	NA	NA	NA	GSE13294	CRC_AFFY
GSM335663	C4	NA	NA	NA	NA	NA	NA	NA	NA	NA	NA	NA	NA	MSI	NA	UNKNOWN	NA	NA	NA	NA	NA	GSE13294	CRC_AFFY
GSM335664	C2	NA	NA	NA	NA	NA	NA	NA	NA	NA	NA	NA	NA	MSI	NA	CMS1	NA	NA	NA	NA	NA	GSE13294	CRC_AFFY
GSM358342	C2	53	<=65yr	Female	NA	NA	NA	Stage I	NA	1	14.53	NA	NA	NA	NA	CMS4	Rectum	N	NA	NA	NA	GSE14333	CRC_AFFY
GSM358343	C4	80	>65yr	Female	NA	NA	NA	Stage I	NA	0	16.47	NA	NA	NA	NA	CMS4	Left	N	NA	NA	NA	GSE14333	CRC_AFFY
GSM358344	C2	58	<=65yr	Male	NA	NA	NA	Stage I	NA	0	19.75	NA	NA	NA	NA	CMS2	Left	N	NA	NA	NA	GSE14333	CRC_AFFY
GSM358345	C4	81	>65yr	Male	NA	NA	NA	Stage I	NA	0	20.02	NA	NA	NA	NA	CMS4	Left	N	NA	NA	NA	GSE14333	CRC_AFFY
GSM358354	C4	87	>65yr	Female	NA	NA	NA	Stage I	NA	0	64.1	NA	NA	NA	NA	CMS3	Right	N	NA	NA	NA	GSE14333	CRC_AFFY
GSM358355	C4	61	<=65yr	Female	NA	NA	NA	Stage I	NA	0	64.37	NA	NA	NA	NA	CMS1	Left	N	NA	NA	NA	GSE14333	CRC_AFFY
GSM358357	C1	68	>65yr	Female	NA	NA	NA	Stage I	NA	0	67.19	NA	NA	NA	NA	CMS3	Left	N	NA	NA	NA	GSE14333	CRC_AFFY
GSM358359	C2	61	<=65yr	Male	NA	NA	NA	Stage I	NA	0	68.51	NA	NA	NA	NA	CMS4	Rectum	N	NA	NA	NA	GSE14333	CRC_AFFY
GSM358362	C4	62	<=65yr	Male	NA	NA	NA	Stage I	NA	0	83.6	NA	NA	NA	NA	CMS1	Right	N	NA	NA	NA	GSE14333	CRC_AFFY
GSM358363	C1	70	>65yr	Male	NA	NA	NA	Stage I	NA	0	83.73	NA	NA	NA	NA	CMS2	Rectum	N	NA	NA	NA	GSE14333	CRC_AFFY
GSM358364	C3	66	>65yr	Male	NA	NA	NA	Stage I	NA	0	84.13	NA	NA	NA	NA	CMS4	Rectum	N	NA	NA	NA	GSE14333	CRC_AFFY
GSM358369	C2	75	>65yr	Male	NA	NA	NA	Stage I	NA	NA	NA	NA	NA	NA	NA	CMS3	Right	N	NA	NA	NA	GSE14333	CRC_AFFY
GSM358370	C1	67	>65yr	Female	NA	NA	NA	Stage I	NA	0	22.8	NA	NA	NA	NA	UNKNOWN	Rectum	N	NA	NA	NA	GSE14333	CRC_AFFY
GSM358371	C1	67	>65yr	Female	NA	NA	NA	Stage I	NA	0	14.4	NA	NA	NA	NA	CMS2	Left	N	NA	NA	NA	GSE14333	CRC_AFFY
GSM358372	C1	60	<=65yr	Male	NA	NA	NA	Stage I	NA	NA	NA	NA	NA	NA	NA	CMS2	Left	N	NA	NA	NA	GSE14333	CRC_AFFY
GSM358373	C1	74	>65yr	Male	NA	NA	NA	Stage I	NA	0	54.4	NA	NA	NA	NA	CMS2	Rectum	N	NA	NA	NA	GSE14333	CRC_AFFY
GSM358374	C2	47	<=65yr	Female	NA	NA	NA	Stage I	NA	0	64.5	NA	NA	NA	NA	CMS3	Right	N	NA	NA	NA	GSE14333	CRC_AFFY
GSM358375	C1	73	>65yr	Male	NA	NA	NA	Stage I	NA	0	1.8	NA	NA	NA	NA	UNKNOWN	Right	N	NA	NA	NA	GSE14333	CRC_AFFY
GSM358376	C1	63	<=65yr	Female	NA	NA	NA	Stage I	NA	0	42	NA	NA	NA	NA	CMS1	Right	N	NA	NA	NA	GSE14333	CRC_AFFY
GSM358377	C4	77	>65yr	Female	NA	NA	NA	Stage I	NA	0	56.5	NA	NA	NA	NA	CMS1	Right	N	NA	NA	NA	GSE14333	CRC_AFFY
GSM358378	C1	74	>65yr	Male	NA	NA	NA	Stage I	NA	0	36.3	NA	NA	NA	NA	UNKNOWN	Left	N	NA	NA	NA	GSE14333	CRC_AFFY
GSM358379	C3	75	>65yr	Male	NA	NA	NA	Stage I	NA	NA	NA	NA	NA	NA	NA	UNKNOWN	Left	N	NA	NA	NA	GSE14333	CRC_AFFY
GSM358380	C1	57	<=65yr	Male	NA	NA	NA	Stage I	NA	0	44.2	NA	NA	NA	NA	CMS2	Left	N	NA	NA	NA	GSE14333	CRC_AFFY
GSM358381	C4	65	<=65yr	Female	NA	NA	NA	Stage I	NA	0	52.1	NA	NA	NA	NA	CMS3	NA	N	NA	NA	NA	GSE14333	CRC_AFFY
GSM358382	C3	76	>65yr	Female	NA	NA	NA	Stage I	NA	0	30	NA	NA	NA	NA	CMS2	Right	N	NA	NA	NA	GSE14333	CRC_AFFY
GSM358383	C1	58	<=65yr	Female	NA	NA	NA	Stage I	NA	0	43.9	NA	NA	NA	NA	CMS4	Left	N	NA	NA	NA	GSE14333	CRC_AFFY
GSM358384	C2	64	<=65yr	Female	NA	NA	NA	Stage I	NA	0	80.8	NA	NA	NA	NA	CMS4	Rectum	N	NA	NA	NA	GSE14333	CRC_AFFY
GSM358386	C3	30	<=65yr	Male	NA	NA	NA	Stage II	NA	1	6.01	NA	NA	NA	NA	CMS4	Left	N	NA	NA	NA	GSE14333	CRC_AFFY
GSM358387	C1	54	<=65yr	Male	NA	NA	NA	Stage II	NA	1	9.96	NA	NA	NA	NA	CMS1	Rectum	Y	NA	NA	NA	GSE14333	CRC_AFFY
GSM358389	C2	83	>65yr	Male	NA	NA	NA	Stage II	NA	1	14.26	NA	NA	NA	NA	CMS4	Rectum	N	NA	NA	NA	GSE14333	CRC_AFFY
GSM358390	C3	54	<=65yr	Male	NA	NA	NA	Stage II	NA	0	15.05	NA	NA	NA	NA	CMS4	Left	N	NA	NA	NA	GSE14333	CRC_AFFY
GSM358394	C3	80	>65yr	Male	NA	NA	NA	Stage II	NA	1	19.36	NA	NA	NA	NA	CMS4	Left	N	NA	NA	NA	GSE14333	CRC_AFFY
GSM358395	C2	78	>65yr	Female	NA	NA	NA	Stage II	NA	0	22.02	NA	NA	NA	NA	CMS1	Right	Y	NA	NA	NA	GSE14333	CRC_AFFY
GSM358399	C1	56	<=65yr	Female	NA	NA	NA	Stage II	NA	1	25.21	NA	NA	NA	NA	UNKNOWN	Left	Y	NA	NA	NA	GSE14333	CRC_AFFY
GSM358402	C1	79	>65yr	Female	NA	NA	NA	Stage II	NA	0	26.53	NA	NA	NA	NA	CMS2	Left	N	NA	NA	NA	GSE14333	CRC_AFFY
GSM358403	C2	71	>65yr	Male	NA	NA	NA	Stage II	NA	0	26.66	NA	NA	NA	NA	CMS2	Right	N	NA	NA	NA	GSE14333	CRC_AFFY
GSM358406	C4	51	<=65yr	Female	NA	NA	NA	Stage II	NA	1	27.64	NA	NA	NA	NA	CMS1	Left	Y	NA	NA	NA	GSE14333	CRC_AFFY
GSM358407	C1	84	>65yr	Female	NA	NA	NA	Stage II	NA	0	28.63	NA	NA	NA	NA	CMS2	Right	N	NA	NA	NA	GSE14333	CRC_AFFY
GSM358409	C2	64	<=65yr	Female	NA	NA	NA	Stage II	NA	0	29.22	NA	NA	NA	NA	CMS4	Right	N	NA	NA	NA	GSE14333	CRC_AFFY
GSM358413	C2	60	<=65yr	Male	NA	NA	NA	Stage II	NA	0	35.9	NA	NA	NA	NA	CMS4	Left	N	NA	NA	NA	GSE14333	CRC_AFFY
GSM358416	C3	71	>65yr	Male	NA	NA	NA	Stage II	NA	0	37.31	NA	NA	NA	NA	CMS4	Left	N	NA	NA	NA	GSE14333	CRC_AFFY
GSM358421	C2	71	>65yr	Male	NA	NA	NA	Stage II	NA	0	49.84	NA	NA	NA	NA	CMS2	Right	N	NA	NA	NA	GSE14333	CRC_AFFY
GSM358422	C4	65	<=65yr	Female	NA	NA	NA	Stage II	NA	0	52.14	NA	NA	NA	NA	UNKNOWN	Left	N	NA	NA	NA	GSE14333	CRC_AFFY
GSM358426	C4	75	>65yr	Male	NA	NA	NA	Stage II	NA	0	58.02	NA	NA	NA	NA	UNKNOWN	Left	N	NA	NA	NA	GSE14333	CRC_AFFY
GSM358428	C2	67	>65yr	Male	NA	NA	NA	Stage II	NA	0	59.96	NA	NA	NA	NA	CMS3	Right	N	NA	NA	NA	GSE14333	CRC_AFFY
GSM358439	C1	70	>65yr	Male	NA	NA	NA	Stage II	NA	0	106.94	NA	NA	NA	NA	CMS2	Left	N	NA	NA	NA	GSE14333	CRC_AFFY
GSM358440	C3	43	<=65yr	Female	NA	NA	NA	Stage II	NA	0	110.79	NA	NA	NA	NA	CMS4	Left	N	NA	NA	NA	GSE14333	CRC_AFFY
GSM358442	C1	92	>65yr	Female	NA	NA	NA	Stage II	NA	0	12.1	NA	NA	NA	NA	CMS3	Right	N	NA	NA	NA	GSE14333	CRC_AFFY
GSM358443	C4	74	>65yr	Female	NA	NA	NA	Stage II	NA	0	29.6	NA	NA	NA	NA	UNKNOWN	Right	N	NA	NA	NA	GSE14333	CRC_AFFY
GSM358444	C1	82	>65yr	Male	NA	NA	NA	Stage II	NA	0	37	NA	NA	NA	NA	CMS3	Rectum	N	NA	NA	NA	GSE14333	CRC_AFFY
GSM358445	C1	60	<=65yr	Male	NA	NA	NA	Stage II	NA	0	28.5	NA	NA	NA	NA	UNKNOWN	Right	N	NA	NA	NA	GSE14333	CRC_AFFY
GSM358446	C3	82	>65yr	Male	NA	NA	NA	Stage II	NA	0	56.3	NA	NA	NA	NA	CMS4	Right	N	NA	NA	NA	GSE14333	CRC_AFFY
GSM358447	C4	53	<=65yr	Male	NA	NA	NA	Stage II	NA	0	47.4	NA	NA	NA	NA	CMS1	Right	Y	NA	NA	NA	GSE14333	CRC_AFFY
GSM358448	C1	92	>65yr	Male	NA	NA	NA	Stage II	NA	0	13.5	NA	NA	NA	NA	CMS2	Right	N	NA	NA	NA	GSE14333	CRC_AFFY
GSM358449	C1	72	>65yr	Male	NA	NA	NA	Stage II	NA	0	56.8	NA	NA	NA	NA	CMS2	Left	N	NA	NA	NA	GSE14333	CRC_AFFY
GSM358450	C2	70	>65yr	Male	NA	NA	NA	Stage II	NA	0	52.8	NA	NA	NA	NA	CMS3	Left	N	NA	NA	NA	GSE14333	CRC_AFFY
GSM358451	C1	68	>65yr	Female	NA	NA	NA	Stage II	NA	0	45.3	NA	NA	NA	NA	UNKNOWN	Right	N	NA	NA	NA	GSE14333	CRC_AFFY
GSM358452	C2	61	<=65yr	Male	NA	NA	NA	Stage II	NA	0	55.7	NA	NA	NA	NA	CMS3	Rectum	N	NA	NA	NA	GSE14333	CRC_AFFY
GSM358453	C4	62	<=65yr	Male	NA	NA	NA	Stage II	NA	0	40	NA	NA	NA	NA	CMS3	Right	N	NA	NA	NA	GSE14333	CRC_AFFY
GSM358454	C1	78	>65yr	Male	NA	NA	NA	Stage II	NA	1	14.2	NA	NA	NA	NA	CMS1	Right	N	NA	NA	NA	GSE14333	CRC_AFFY
GSM358455	C1	80	>65yr	Male	NA	NA	NA	Stage II	NA	0	4.1	NA	NA	NA	NA	CMS3	Right	N	NA	NA	NA	GSE14333	CRC_AFFY
GSM358456	C3	30	<=65yr	Female	NA	NA	NA	Stage II	NA	0	59.5	NA	NA	NA	NA	CMS2	Left	N	NA	NA	NA	GSE14333	CRC_AFFY
GSM358457	C1	79	>65yr	Female	NA	NA	NA	Stage II	NA	0	42.9	NA	NA	NA	NA	UNKNOWN	Right	N	NA	NA	NA	GSE14333	CRC_AFFY
GSM358458	C3	54	<=65yr	Female	NA	NA	NA	Stage II	NA	1	32.6	NA	NA	NA	NA	CMS1	Right	N	NA	NA	NA	GSE14333	CRC_AFFY
GSM358459	C1	44	<=65yr	Male	NA	NA	NA	Stage II	NA	0	31.3	NA	NA	NA	NA	UNKNOWN	Right	N	NA	NA	NA	GSE14333	CRC_AFFY
GSM358460	C1	66	>65yr	Female	NA	NA	NA	Stage II	NA	0	33.9	NA	NA	NA	NA	CMS2	Right	N	NA	NA	NA	GSE14333	CRC_AFFY
GSM358461	C1	64	<=65yr	Male	NA	NA	NA	Stage II	NA	0	47.7	NA	NA	NA	NA	CMS2	Left	N	NA	NA	NA	GSE14333	CRC_AFFY
GSM358462	C2	72	>65yr	Male	NA	NA	NA	Stage II	NA	0	38.2	NA	NA	NA	NA	CMS4	Rectum	N	NA	NA	NA	GSE14333	CRC_AFFY
GSM358463	C4	63	<=65yr	Female	NA	NA	NA	Stage II	NA	0	44.4	NA	NA	NA	NA	CMS1	Left	N	NA	NA	NA	GSE14333	CRC_AFFY
GSM358464	C3	66	>65yr	Male	NA	NA	NA	Stage II	NA	0	44.8	NA	NA	NA	NA	CMS3	Rectum	N	NA	NA	NA	GSE14333	CRC_AFFY
GSM358465	C4	63	<=65yr	Male	NA	NA	NA	Stage II	NA	0	57	NA	NA	NA	NA	CMS1	Rectum	N	NA	NA	NA	GSE14333	CRC_AFFY
GSM358466	C2	78	>65yr	Male	NA	NA	NA	Stage II	NA	0	40.4	NA	NA	NA	NA	UNKNOWN	Rectum	N	NA	NA	NA	GSE14333	CRC_AFFY
GSM358467	C2	74	>65yr	Male	NA	NA	NA	Stage II	NA	0	5.2	NA	NA	NA	NA	CMS1	Left	N	NA	NA	NA	GSE14333	CRC_AFFY
GSM358468	C2	64.6	<=65yr	Male	NA	NA	NA	Stage II	NA	0	11.6	NA	NA	NA	NA	CMS2	Rectum	N	NA	NA	NA	GSE14333	CRC_AFFY
GSM358469	C1	53	<=65yr	Female	NA	NA	NA	Stage II	NA	0	58.4	NA	NA	NA	NA	CMS3	Right	Y	NA	NA	NA	GSE14333	CRC_AFFY
GSM358470	C3	78	>65yr	Female	NA	NA	NA	Stage II	NA	0	36.2	NA	NA	NA	NA	CMS3	Right	N	NA	NA	NA	GSE14333	CRC_AFFY
GSM358471	C1	78	>65yr	Female	NA	NA	NA	Stage II	NA	0	45.4	NA	NA	NA	NA	CMS2	NA	N	NA	NA	NA	GSE14333	CRC_AFFY
GSM358472	C3	70	>65yr	Male	NA	NA	NA	Stage II	NA	0	50.9	NA	NA	NA	NA	CMS4	Left	N	NA	NA	NA	GSE14333	CRC_AFFY
GSM358473	C2	81	>65yr	Female	NA	NA	NA	Stage II	NA	0	55.9	NA	NA	NA	NA	CMS3	Right	N	NA	NA	NA	GSE14333	CRC_AFFY
GSM358474	C1	75	>65yr	Male	NA	NA	NA	Stage II	NA	1	14.3	NA	NA	NA	NA	CMS2	Rectum	Y	NA	NA	NA	GSE14333	CRC_AFFY
GSM358475	C3	63	<=65yr	Female	NA	NA	NA	Stage II	NA	0	33.8	NA	NA	NA	NA	CMS4	Left	N	NA	NA	NA	GSE14333	CRC_AFFY
GSM358476	C3	63	<=65yr	Male	NA	NA	NA	Stage II	NA	0	38	NA	NA	NA	NA	CMS4	Left	N	NA	NA	NA	GSE14333	CRC_AFFY
GSM358477	C4	48	<=65yr	Female	NA	NA	NA	Stage II	NA	0	74.2	NA	NA	NA	NA	CMS1	Right	Y	NA	NA	NA	GSE14333	CRC_AFFY
GSM358478	C3	72	>65yr	Male	NA	NA	NA	Stage II	NA	0	84.9	NA	NA	NA	NA	CMS4	Right	N	NA	NA	NA	GSE14333	CRC_AFFY
GSM358480	C3	71	>65yr	Female	NA	NA	NA	Stage III	NA	1	1.57	NA	NA	NA	NA	CMS1	Right	Y	NA	NA	NA	GSE14333	CRC_AFFY
GSM358486	C2	67	>65yr	Female	NA	NA	NA	Stage III	NA	1	8.31	NA	NA	NA	NA	CMS3	Left	Y	NA	NA	NA	GSE14333	CRC_AFFY
GSM358490	C1	60	<=65yr	Male	NA	NA	NA	Stage III	NA	1	14.72	NA	NA	NA	NA	CMS2	Right	Y	NA	NA	NA	GSE14333	CRC_AFFY
GSM358492	C4	50	<=65yr	Female	NA	NA	NA	Stage III	NA	1	18.93	NA	NA	NA	NA	CMS4	Rectum	N	NA	NA	NA	GSE14333	CRC_AFFY
GSM358502	C4	78	>65yr	Female	NA	NA	NA	Stage III	NA	0	26.26	NA	NA	NA	NA	CMS1	Right	N	NA	NA	NA	GSE14333	CRC_AFFY
GSM358504	C2	58	<=65yr	Male	NA	NA	NA	Stage III	NA	1	27.58	NA	NA	NA	NA	CMS4	Left	Y	NA	NA	NA	GSE14333	CRC_AFFY
GSM358512	C4	60	<=65yr	Female	NA	NA	NA	Stage III	NA	0	38.07	NA	NA	NA	NA	UNKNOWN	Right	Y	NA	NA	NA	GSE14333	CRC_AFFY
GSM358513	C2	73	>65yr	Female	NA	NA	NA	Stage III	NA	0	38.72	NA	NA	NA	NA	CMS4	Right	Y	NA	NA	NA	GSE14333	CRC_AFFY
GSM358514	C3	69	>65yr	Male	NA	NA	NA	Stage III	NA	1	41.06	NA	NA	NA	NA	CMS4	Left	Y	NA	NA	NA	GSE14333	CRC_AFFY
GSM358526	C3	63	<=65yr	Male	NA	NA	NA	Stage III	NA	0	64.33	NA	NA	NA	NA	CMS4	Left	Y	NA	NA	NA	GSE14333	CRC_AFFY
GSM358527	C3	62	<=65yr	Male	NA	NA	NA	Stage III	NA	0	64.93	NA	NA	NA	NA	CMS1	Left	Y	NA	NA	NA	GSE14333	CRC_AFFY
GSM358530	C3	50	<=65yr	Female	NA	NA	NA	Stage III	NA	0	74.36	NA	NA	NA	NA	CMS4	Rectum	Y	NA	NA	NA	GSE14333	CRC_AFFY
GSM358532	C2	60	<=65yr	Male	NA	NA	NA	Stage III	NA	1	79.46	NA	NA	NA	NA	CMS4	Left	N	NA	NA	NA	GSE14333	CRC_AFFY
GSM358533	C2	71	>65yr	Female	NA	NA	NA	Stage III	NA	0	85.61	NA	NA	NA	NA	CMS4	Rectum	Y	NA	NA	NA	GSE14333	CRC_AFFY
GSM358535	C3	46	<=65yr	Male	NA	NA	NA	Stage III	NA	0	89.62	NA	NA	NA	NA	CMS4	Left	Y	NA	NA	NA	GSE14333	CRC_AFFY
GSM358540	C1	75	>65yr	Male	NA	NA	NA	Stage III	NA	0	30.9	NA	NA	NA	NA	CMS2	Rectum	Y	NA	NA	NA	GSE14333	CRC_AFFY
GSM358541	C3	64	<=65yr	Female	NA	NA	NA	Stage III	NA	0	24	NA	NA	NA	NA	CMS4	Left	Y	NA	NA	NA	GSE14333	CRC_AFFY
GSM358542	C1	51	<=65yr	Male	NA	NA	NA	Stage III	NA	0	31.6	NA	NA	NA	NA	CMS2	Right	Y	NA	NA	NA	GSE14333	CRC_AFFY
GSM358543	C1	69	>65yr	Male	NA	NA	NA	Stage III	NA	0	49.6	NA	NA	NA	NA	CMS3	Right	Y	NA	NA	NA	GSE14333	CRC_AFFY
GSM358544	C1	69	>65yr	Male	NA	NA	NA	Stage III	NA	1	15.2	NA	NA	NA	NA	CMS2	Left	Y	NA	NA	NA	GSE14333	CRC_AFFY
GSM358545	C2	84	>65yr	Female	NA	NA	NA	Stage III	NA	0	24.2	NA	NA	NA	NA	CMS3	Left	N	NA	NA	NA	GSE14333	CRC_AFFY
GSM358546	C3	59	<=65yr	Male	NA	NA	NA	Stage III	NA	0	69.1	NA	NA	NA	NA	CMS4	Left	Y	NA	NA	NA	GSE14333	CRC_AFFY
GSM358547	C4	74	>65yr	Male	NA	NA	NA	Stage III	NA	0	68.1	NA	NA	NA	NA	UNKNOWN	Left	Y	NA	NA	NA	GSE14333	CRC_AFFY
GSM358548	C3	62	<=65yr	Male	NA	NA	NA	Stage III	NA	1	10.3	NA	NA	NA	NA	CMS1	Right	Y	NA	NA	NA	GSE14333	CRC_AFFY
GSM358549	C1	56	<=65yr	Female	NA	NA	NA	Stage III	NA	0	59.2	NA	NA	NA	NA	UNKNOWN	Rectum	Y	NA	NA	NA	GSE14333	CRC_AFFY
GSM358550	C1	73	>65yr	Male	NA	NA	NA	Stage III	NA	0	61.4	NA	NA	NA	NA	CMS2	Rectum	N	NA	NA	NA	GSE14333	CRC_AFFY
GSM358551	C4	72	>65yr	Female	NA	NA	NA	Stage III	NA	0	15	NA	NA	NA	NA	CMS1	Right	N	NA	NA	NA	GSE14333	CRC_AFFY
GSM358552	C4	60	<=65yr	Female	NA	NA	NA	Stage III	NA	0	57.8	NA	NA	NA	NA	CMS2	Right	Y	NA	NA	NA	GSE14333	CRC_AFFY
GSM358553	C3	77	>65yr	Female	NA	NA	NA	Stage III	NA	0	18.8	NA	NA	NA	NA	CMS4	Rectum	N	NA	NA	NA	GSE14333	CRC_AFFY
GSM358554	C4	79	>65yr	Female	NA	NA	NA	Stage III	NA	1	4.5	NA	NA	NA	NA	CMS1	Right	N	NA	NA	NA	GSE14333	CRC_AFFY
GSM358555	C3	83	>65yr	Male	NA	NA	NA	Stage III	NA	1	38.1	NA	NA	NA	NA	CMS4	Rectum	N	NA	NA	NA	GSE14333	CRC_AFFY
GSM358556	C1	69	>65yr	Male	NA	NA	NA	Stage III	NA	0	40.4	NA	NA	NA	NA	CMS2	Right	Y	NA	NA	NA	GSE14333	CRC_AFFY
GSM358557	C2	73	>65yr	Male	NA	NA	NA	Stage III	NA	1	5.7	NA	NA	NA	NA	CMS3	Right	N	NA	NA	NA	GSE14333	CRC_AFFY
GSM358558	C3	66	>65yr	Male	NA	NA	NA	Stage III	NA	0	10.2	NA	NA	NA	NA	CMS4	Rectum	Y	NA	NA	NA	GSE14333	CRC_AFFY
GSM358559	C1	75	>65yr	Male	NA	NA	NA	Stage III	NA	0	84.7	NA	NA	NA	NA	UNKNOWN	Right	Y	NA	NA	NA	GSE14333	CRC_AFFY
GSM358560	C1	77	>65yr	Female	NA	NA	NA	Stage III	NA	0	16.9	NA	NA	NA	NA	UNKNOWN	Rectum	N	NA	NA	NA	GSE14333	CRC_AFFY
GSM358561	C3	49	<=65yr	Female	NA	NA	NA	Stage III	NA	1	9.5	NA	NA	NA	NA	CMS3	Left	Y	NA	NA	NA	GSE14333	CRC_AFFY
GSM358562	C1	77	>65yr	Female	NA	NA	NA	Stage III	NA	0	68.7	NA	NA	NA	NA	CMS3	Right	Y	NA	NA	NA	GSE14333	CRC_AFFY
GSM358563	C2	77	>65yr	Male	NA	NA	NA	Stage III	NA	0	59.5	NA	NA	NA	NA	CMS3	Right	N	NA	NA	NA	GSE14333	CRC_AFFY
GSM358564	C2	59	<=65yr	Male	NA	NA	NA	Stage III	NA	0	18.7	NA	NA	NA	NA	CMS3	Left	Y	NA	NA	NA	GSE14333	CRC_AFFY
GSM358565	C1	43	<=65yr	Male	NA	NA	NA	Stage III	NA	0	70.8	NA	NA	NA	NA	CMS2	Left	Y	NA	NA	NA	GSE14333	CRC_AFFY
GSM358566	C1	82	>65yr	Female	NA	NA	NA	Stage III	NA	1	4.44	NA	NA	NA	NA	CMS2	Right	N	NA	NA	NA	GSE14333	CRC_AFFY
GSM358567	C3	51	<=65yr	Male	NA	NA	NA	Stage III	NA	1	40	NA	NA	NA	NA	CMS4	Right	Y	NA	NA	NA	GSE14333	CRC_AFFY
GSM358568	C2	53	<=65yr	Female	NA	NA	NA	Stage III	NA	1	72.9	NA	NA	NA	NA	CMS3	Left	Y	NA	NA	NA	GSE14333	CRC_AFFY
GSM358569	C1	81	>65yr	Male	NA	NA	NA	Stage III	NA	1	18	NA	NA	NA	NA	CMS1	Right	N	NA	NA	NA	GSE14333	CRC_AFFY
GSM358570	C3	69	>65yr	Male	NA	NA	NA	Stage IV	NA	NA	NA	NA	NA	NA	NA	CMS4	Rectum	N	NA	NA	NA	GSE14333	CRC_AFFY
GSM358573	C4	63	<=65yr	Female	NA	NA	NA	Stage IV	NA	NA	NA	NA	NA	NA	NA	CMS4	Left	N	NA	NA	NA	GSE14333	CRC_AFFY
GSM358575	C3	88	>65yr	Male	NA	NA	NA	Stage IV	NA	NA	NA	NA	NA	NA	NA	CMS4	Right	N	NA	NA	NA	GSE14333	CRC_AFFY
GSM358582	C4	52	<=65yr	Female	NA	NA	NA	Stage IV	NA	NA	NA	NA	NA	NA	NA	CMS4	Rectum	Y	NA	NA	NA	GSE14333	CRC_AFFY
GSM358591	C2	63	<=65yr	Male	NA	NA	NA	Stage IV	NA	NA	NA	NA	NA	NA	NA	CMS4	Left	Y	NA	NA	NA	GSE14333	CRC_AFFY
GSM358599	C2	78	>65yr	Female	NA	NA	NA	Stage IV	NA	NA	NA	NA	NA	NA	NA	CMS1	Rectum	Y	NA	NA	NA	GSE14333	CRC_AFFY
GSM358600	C2	51	<=65yr	Male	NA	NA	NA	Stage IV	NA	NA	NA	NA	NA	NA	NA	UNKNOWN	Left	Y	NA	NA	NA	GSE14333	CRC_AFFY
GSM358608	C4	66	>65yr	Female	NA	NA	NA	Stage IV	NA	NA	NA	NA	NA	NA	NA	CMS3	Right	N	NA	NA	NA	GSE14333	CRC_AFFY
GSM358611	C3	46	<=65yr	Male	NA	NA	NA	Stage IV	NA	NA	NA	NA	NA	NA	NA	CMS4	Left	Y	NA	NA	NA	GSE14333	CRC_AFFY
GSM358612	C1	79	>65yr	Male	NA	NA	NA	Stage IV	NA	NA	NA	NA	NA	NA	NA	CMS2	Left	N	NA	NA	NA	GSE14333	CRC_AFFY
GSM358613	C1	69	>65yr	Female	NA	NA	NA	Stage IV	NA	NA	NA	NA	NA	NA	NA	UNKNOWN	Left	N	NA	NA	NA	GSE14333	CRC_AFFY
GSM358614	C2	54	<=65yr	Male	NA	NA	NA	Stage IV	NA	NA	NA	NA	NA	NA	NA	CMS4	Right	N	NA	NA	NA	GSE14333	CRC_AFFY
GSM358615	C1	79	>65yr	Male	NA	NA	NA	Stage IV	NA	NA	NA	NA	NA	NA	NA	UNKNOWN	Left	N	NA	NA	NA	GSE14333	CRC_AFFY
GSM358616	C1	46	<=65yr	Male	NA	NA	NA	Stage IV	NA	NA	NA	NA	NA	NA	NA	CMS2	Left	N	NA	NA	NA	GSE14333	CRC_AFFY
GSM358617	C3	62	<=65yr	Male	NA	NA	NA	Stage IV	NA	NA	NA	NA	NA	NA	NA	CMS4	Rectum	N	NA	NA	NA	GSE14333	CRC_AFFY
GSM358618	C3	67	>65yr	Male	NA	NA	NA	Stage IV	NA	NA	NA	NA	NA	NA	NA	CMS2	Left	N	NA	NA	NA	GSE14333	CRC_AFFY
GSM358619	C1	65	<=65yr	Male	NA	NA	NA	Stage IV	NA	NA	NA	NA	NA	NA	NA	CMS2	Rectum	N	NA	NA	NA	GSE14333	CRC_AFFY
GSM358620	C1	76	>65yr	Female	NA	NA	NA	Stage IV	NA	NA	NA	NA	NA	NA	NA	CMS3	Left	N	NA	NA	NA	GSE14333	CRC_AFFY
GSM358621	C3	57	<=65yr	Male	NA	NA	NA	Stage IV	NA	NA	NA	NA	NA	NA	NA	CMS4	Right	N	NA	NA	NA	GSE14333	CRC_AFFY
GSM358622	C2	81	>65yr	Female	NA	NA	NA	Stage IV	NA	NA	NA	NA	NA	NA	NA	CMS3	Left	N	NA	NA	NA	GSE14333	CRC_AFFY
GSM358623	C1	84	>65yr	Male	NA	NA	NA	Stage IV	NA	NA	NA	NA	NA	NA	NA	UNKNOWN	Rectum	N	NA	NA	NA	GSE14333	CRC_AFFY
GSM358624	C4	59	<=65yr	Male	NA	NA	NA	Stage IV	NA	NA	NA	NA	NA	NA	NA	CMS2	Rectum	N	NA	NA	NA	GSE14333	CRC_AFFY
GSM358625	C3	79	>65yr	Male	NA	NA	NA	Stage IV	NA	NA	NA	NA	NA	NA	NA	CMS4	Left	N	NA	NA	NA	GSE14333	CRC_AFFY
GSM358626	C1	65	<=65yr	Male	NA	NA	NA	Stage IV	NA	NA	NA	NA	NA	NA	NA	CMS3	Right	NA	NA	NA	NA	GSE14333	CRC_AFFY
GSM358627	C1	73.4	>65yr	Male	NA	NA	NA	Stage IV	NA	NA	NA	NA	NA	NA	NA	CMS4	Left	N	NA	NA	NA	GSE14333	CRC_AFFY
GSM358628	C3	59	<=65yr	Male	NA	NA	NA	Stage IV	NA	NA	NA	NA	NA	NA	NA	CMS4	NA	N	NA	NA	NA	GSE14333	CRC_AFFY
GSM358629	C1	76	>65yr	Female	NA	NA	NA	Stage IV	NA	NA	NA	NA	NA	NA	NA	UNKNOWN	Right	Y	NA	NA	NA	GSE14333	CRC_AFFY
GSM358630	C2	67	>65yr	Male	NA	NA	NA	Stage IV	NA	NA	NA	NA	NA	NA	NA	CMS4	Rectum	N	NA	NA	NA	GSE14333	CRC_AFFY
GSM437093	C4	73	>65yr	Male	NA	NA	NA	Stage I	Grade 2	0	142.55	0	142.55	NA	NA	UNKNOWN	NA	NA	NA	NA	NA	GSE17536	CRC_AFFY
GSM437094	C2	63	<=65yr	Male	NA	NA	NA	Stage I	Grade 1	0	122.72	0	122.72	NA	NA	CMS3	NA	NA	NA	NA	NA	GSE17536	CRC_AFFY
GSM437095	C1	51	<=65yr	Male	NA	NA	NA	Stage I	Grade 2	0	28.96	1	28.96	NA	NA	CMS2	NA	NA	NA	NA	NA	GSE17536	CRC_AFFY
GSM437096	C1	56	<=65yr	Female	NA	NA	NA	Stage I	Grade 1	0	119.21	0	119.21	NA	NA	CMS3	NA	NA	NA	NA	NA	GSE17536	CRC_AFFY
GSM437097	C4	50	<=65yr	Male	NA	NA	NA	Stage I	Grade 2	0	59.53	0	59.53	NA	NA	UNKNOWN	NA	NA	NA	NA	NA	GSE17536	CRC_AFFY
GSM437098	C4	63	<=65yr	Female	NA	NA	NA	Stage I	Grade 2	1	27.02	1	68.81	NA	NA	CMS4	NA	NA	NA	NA	NA	GSE17536	CRC_AFFY
GSM437099	C4	66	>65yr	Male	NA	NA	NA	Stage I	Grade 1	0	82.29	0	82.29	NA	NA	CMS3	NA	NA	NA	NA	NA	GSE17536	CRC_AFFY
GSM437100	C2	63	<=65yr	Male	NA	NA	NA	Stage I	Grade 2	0	109.21	0	110.82	NA	NA	CMS2	NA	NA	NA	NA	NA	GSE17536	CRC_AFFY
GSM437101	C1	88	>65yr	Male	NA	NA	NA	Stage I	Grade 2	0	65.88	1	65.88	NA	NA	CMS2	NA	NA	NA	NA	NA	GSE17536	CRC_AFFY
GSM437102	C3	66	>65yr	Male	NA	NA	NA	Stage I	Grade 2	0	84.13	0	84.13	NA	NA	CMS4	NA	NA	NA	NA	NA	GSE17536	CRC_AFFY
GSM437103	C4	80	>65yr	Female	NA	NA	NA	Stage I	Grade 2	0	16.47	1	16.47	NA	NA	CMS2	NA	NA	NA	NA	NA	GSE17536	CRC_AFFY
GSM437104	C4	62	<=65yr	Male	NA	NA	NA	Stage I	Grade 2	0	83.6	0	89.75	NA	NA	CMS1	NA	NA	NA	NA	NA	GSE17536	CRC_AFFY
GSM437105	C4	82	>65yr	Male	NA	NA	NA	Stage I	Grade 2	0	76.07	0	76.07	NA	NA	CMS1	NA	NA	NA	NA	NA	GSE17536	CRC_AFFY
GSM437106	C4	78	>65yr	Female	NA	NA	NA	Stage I	Grade 2	0	67.82	0	67.82	NA	NA	UNKNOWN	NA	NA	NA	NA	NA	GSE17536	CRC_AFFY
GSM437107	C1	76	>65yr	Male	NA	NA	NA	Stage I	Grade 1	0	52.24	0	52.24	NA	NA	CMS3	NA	NA	NA	NA	NA	GSE17536	CRC_AFFY
GSM437108	C4	87	>65yr	Female	NA	NA	NA	Stage I	Grade 2	0	64.1	0	64.1	NA	NA	CMS3	NA	NA	NA	NA	NA	GSE17536	CRC_AFFY
GSM437109	C2	74	>65yr	Female	NA	NA	NA	Stage I	Grade 2	0	55.13	0	55.13	NA	NA	CMS4	NA	NA	NA	NA	NA	GSE17536	CRC_AFFY
GSM437110	C2	55	<=65yr	Male	NA	NA	NA	Stage I	Grade 2	0	57.79	0	57.79	NA	NA	CMS3	NA	NA	NA	NA	NA	GSE17536	CRC_AFFY
GSM437111	C2	71	>65yr	Male	NA	NA	NA	Stage I	Grade 2	0	50.1	0	50.1	NA	NA	CMS4	NA	NA	NA	NA	NA	GSE17536	CRC_AFFY
GSM437112	C4	86	>65yr	Female	NA	NA	NA	Stage I	Grade 2	0	43.79	0	43.79	NA	NA	CMS2	NA	NA	NA	NA	NA	GSE17536	CRC_AFFY
GSM437113	C2	58	<=65yr	Male	NA	NA	NA	Stage I	Grade 2	0	19.75	0	30.27	NA	NA	CMS2	NA	NA	NA	NA	NA	GSE17536	CRC_AFFY
GSM437114	C1	78	>65yr	Male	NA	NA	NA	Stage I	Grade 2	0	3.64	0	3.64	NA	NA	CMS2	NA	NA	NA	NA	NA	GSE17536	CRC_AFFY
GSM437115	C1	57	<=65yr	Male	NA	NA	NA	Stage I	Grade 1	0	23.96	0	36.59	NA	NA	CMS2	NA	NA	NA	NA	NA	GSE17536	CRC_AFFY
GSM437116	C4	81	>65yr	Male	NA	NA	NA	Stage I	Grade 2	0	20.02	0	20.02	NA	NA	CMS2	NA	NA	NA	NA	NA	GSE17536	CRC_AFFY
GSM437117	C1	74	>65yr	Female	NA	NA	NA	Stage II	Grade 2	0	118.58	0	118.58	NA	NA	CMS4	NA	NA	NA	NA	NA	GSE17536	CRC_AFFY
GSM437118	C4	77	>65yr	Female	NA	NA	NA	Stage II	Grade 3	0	55.33	0	55.33	NA	NA	CMS1	NA	NA	NA	NA	NA	GSE17536	CRC_AFFY
GSM437119	C3	41	<=65yr	Male	NA	NA	NA	Stage II	Grade 2	1	93.66	1	134.86	NA	NA	CMS4	NA	NA	NA	NA	NA	GSE17536	CRC_AFFY
GSM437120	C3	43	<=65yr	Female	NA	NA	NA	Stage II	Grade 2	0	110.79	0	127.29	NA	NA	CMS3	NA	NA	NA	NA	NA	GSE17536	CRC_AFFY
GSM437121	C4	51	<=65yr	Female	NA	NA	NA	Stage II	Grade 2	1	27.64	0	120.62	NA	NA	CMS3	NA	NA	NA	NA	NA	GSE17536	CRC_AFFY
GSM437122	C1	70	>65yr	Male	NA	NA	NA	Stage II	Grade 2	0	106.94	0	106.94	NA	NA	CMS2	NA	NA	NA	NA	NA	GSE17536	CRC_AFFY
GSM437123	C3	78	>65yr	Female	NA	NA	NA	Stage II	Grade 2	NA	0	1	11.7	NA	NA	CMS2	NA	NA	NA	NA	NA	GSE17536	CRC_AFFY
GSM437124	C3	80	>65yr	Male	NA	NA	NA	Stage II	Grade 2	1	19.36	1	28.79	NA	NA	CMS1	NA	NA	NA	NA	NA	GSE17536	CRC_AFFY
GSM437125	C3	66	>65yr	Male	NA	NA	NA	Stage II	Grade 2	0	26.82	1	26.82	NA	NA	CMS1	NA	NA	NA	NA	NA	GSE17536	CRC_AFFY
GSM437126	C4	76	>65yr	Female	NA	NA	NA	Stage II	Grade 2	0	52.5	1	52.5	NA	NA	CMS1	NA	NA	NA	NA	NA	GSE17536	CRC_AFFY
GSM437127	C3	58	<=65yr	Female	NA	NA	NA	Stage II	Grade 3	1	9.05	1	24.03	NA	NA	CMS4	NA	NA	NA	NA	NA	GSE17536	CRC_AFFY
GSM437128	C1	74	>65yr	Male	NA	NA	NA	Stage II	Grade 2	0	88.99	0	88.99	NA	NA	CMS3	NA	NA	NA	NA	NA	GSE17536	CRC_AFFY
GSM437129	C4	49	<=65yr	Male	NA	NA	NA	Stage II	Grade 2	0	64.86	0	102.44	NA	NA	CMS2	NA	NA	NA	NA	NA	GSE17536	CRC_AFFY
GSM437130	C3	54	<=65yr	Female	NA	NA	NA	Stage II	Grade 2	1	14.13	1	33.73	NA	NA	CMS4	NA	NA	NA	NA	NA	GSE17536	CRC_AFFY
GSM437131	C2	71	>65yr	Female	NA	NA	NA	Stage II	Grade 2	0	85.28	0	85.28	NA	NA	CMS2	NA	NA	NA	NA	NA	GSE17536	CRC_AFFY
GSM437132	C1	79	>65yr	Female	NA	NA	NA	Stage II	Grade 2	0	26.53	0	26.53	NA	NA	CMS2	NA	NA	NA	NA	NA	GSE17536	CRC_AFFY
GSM437133	C4	75	>65yr	Female	NA	NA	NA	Stage II	Grade 1	1	37.31	1	37.31	NA	NA	CMS1	NA	NA	NA	NA	NA	GSE17536	CRC_AFFY
GSM437134	C2	74	>65yr	Female	NA	NA	NA	Stage II	Grade 2	0	86.43	0	86.43	NA	NA	CMS4	NA	NA	NA	NA	NA	GSE17536	CRC_AFFY
GSM437135	C3	74	>65yr	Female	NA	NA	NA	Stage II	Grade 2	0	55.92	0	55.92	NA	NA	CMS4	NA	NA	NA	NA	NA	GSE17536	CRC_AFFY
GSM437136	C2	83	>65yr	Female	NA	NA	NA	Stage II	Grade 2	0	70.65	0	70.65	NA	NA	CMS2	NA	NA	NA	NA	NA	GSE17536	CRC_AFFY
GSM437137	C1	73	>65yr	Male	NA	NA	NA	Stage II	Grade 2	0	76.04	0	76.04	NA	NA	CMS2	NA	NA	NA	NA	NA	GSE17536	CRC_AFFY
GSM437138	C1	57	<=65yr	Female	NA	NA	NA	Stage II	Grade 1	0	79.13	0	79.13	NA	NA	CMS3	NA	NA	NA	NA	NA	GSE17536	CRC_AFFY
GSM437139	C1	65	<=65yr	Female	NA	NA	NA	Stage II	Grade 2	1	22.38	0	83.99	NA	NA	CMS2	NA	NA	NA	NA	NA	GSE17536	CRC_AFFY
GSM437140	C1	86	>65yr	Female	NA	NA	NA	Stage II	Grade 2	0	80.25	0	80.25	NA	NA	UNKNOWN	NA	NA	NA	NA	NA	GSE17536	CRC_AFFY
GSM437141	C4	89	>65yr	Female	NA	NA	NA	Stage II	Grade 1	0	28.86	0	40.6	NA	NA	UNKNOWN	NA	NA	NA	NA	NA	GSE17536	CRC_AFFY
GSM437142	C1	56	<=65yr	Female	NA	NA	NA	Stage II	Grade 3	1	25.21	0	95.37	NA	NA	UNKNOWN	NA	NA	NA	NA	NA	GSE17536	CRC_AFFY
GSM437143	C4	86	>65yr	Female	NA	NA	NA	Stage II	Grade 3	1	31.06	1	31.06	NA	NA	CMS1	NA	NA	NA	NA	NA	GSE17536	CRC_AFFY
GSM437144	C3	71	>65yr	Male	NA	NA	NA	Stage II	Grade 2	0	37.31	1	37.31	NA	NA	CMS4	NA	NA	NA	NA	NA	GSE17536	CRC_AFFY
GSM437145	C2	78	>65yr	Female	NA	NA	NA	Stage II	Grade 2	1	22.02	1	22.02	NA	NA	CMS1	NA	NA	NA	NA	NA	GSE17536	CRC_AFFY
GSM437146	C4	76	>65yr	Male	NA	NA	NA	Stage II	Grade 2	0	63.25	0	63.25	NA	NA	CMS3	NA	NA	NA	NA	NA	GSE17536	CRC_AFFY
GSM437147	C4	66	>65yr	Female	NA	NA	NA	Stage II	Grade 3	0	24.19	0	34.09	NA	NA	CMS1	NA	NA	NA	NA	NA	GSE17536	CRC_AFFY
GSM437148	C4	65	<=65yr	Female	NA	NA	NA	Stage II	Grade 2	0	52.14	0	52.14	NA	NA	UNKNOWN	NA	NA	NA	NA	NA	GSE17536	CRC_AFFY
GSM437149	C3	74	>65yr	Female	NA	NA	NA	Stage II	Grade 2	0	59.6	0	66.04	NA	NA	CMS1	NA	NA	NA	NA	NA	GSE17536	CRC_AFFY
GSM437150	C2	67	>65yr	Male	NA	NA	NA	Stage II	Grade 1	0	59.96	0	59.96	NA	NA	CMS3	NA	NA	NA	NA	NA	GSE17536	CRC_AFFY
GSM437151	C1	56	<=65yr	Male	NA	NA	NA	Stage II	Grade 2	0	47.86	0	47.86	NA	NA	CMS2	NA	NA	NA	NA	NA	GSE17536	CRC_AFFY
GSM437152	C2	48	<=65yr	Female	NA	NA	NA	Stage II	Grade 2	0	46.71	0	58.45	NA	NA	CMS4	NA	NA	NA	NA	NA	GSE17536	CRC_AFFY
GSM437153	C1	68	>65yr	Male	NA	NA	NA	Stage II	Grade 2	0	45.99	0	45.99	NA	NA	UNKNOWN	NA	NA	NA	NA	NA	GSE17536	CRC_AFFY
GSM437154	C2	71	>65yr	Male	NA	NA	NA	Stage II	Grade 2	0	49.84	0	60.42	NA	NA	CMS2	NA	NA	NA	NA	NA	GSE17536	CRC_AFFY
GSM437155	C2	38	<=65yr	Female	NA	NA	NA	Stage II	Grade 2	0	17.95	0	37.67	NA	NA	CMS4	NA	NA	NA	NA	NA	GSE17536	CRC_AFFY
GSM437156	C4	73	>65yr	Male	NA	NA	NA	Stage II	Grade 2	0	15.71	0	15.71	NA	NA	CMS1	NA	NA	NA	NA	NA	GSE17536	CRC_AFFY
GSM437157	C3	59	<=65yr	Female	NA	NA	NA	Stage II	Grade 3	0	39.25	0	39.25	NA	NA	CMS4	NA	NA	NA	NA	NA	GSE17536	CRC_AFFY
GSM437158	C1	76	>65yr	Female	NA	NA	NA	Stage II	Grade 2	0	36.75	0	49.87	NA	NA	CMS3	NA	NA	NA	NA	NA	GSE17536	CRC_AFFY
GSM437159	C2	71	>65yr	Male	NA	NA	NA	Stage II	Grade 2	0	25.24	0	25.24	NA	NA	CMS4	NA	NA	NA	NA	NA	GSE17536	CRC_AFFY
GSM437160	C1	58	<=65yr	Male	NA	NA	NA	Stage II	Grade 2	0	44.97	0	44.97	NA	NA	CMS1	NA	NA	NA	NA	NA	GSE17536	CRC_AFFY
GSM437161	C2	60	<=65yr	Male	NA	NA	NA	Stage II	Grade 2	0	35.9	0	35.9	NA	NA	CMS4	NA	NA	NA	NA	NA	GSE17536	CRC_AFFY
GSM437162	C2	71	>65yr	Male	NA	NA	NA	Stage II	Grade 2	0	26.66	0	26.66	NA	NA	CMS2	NA	NA	NA	NA	NA	GSE17536	CRC_AFFY
GSM437163	C2	64	<=65yr	Female	NA	NA	NA	Stage II	Grade 2	0	29.22	0	36.78	NA	NA	CMS4	NA	NA	NA	NA	NA	GSE17536	CRC_AFFY
GSM437164	C1	84	>65yr	Female	NA	NA	NA	Stage II	Grade 2	0	28.63	0	41.52	NA	NA	CMS2	NA	NA	NA	NA	NA	GSE17536	CRC_AFFY
GSM437165	C1	87	>65yr	Female	NA	NA	NA	Stage II	Grade 2	NA	0	0	22.22	NA	NA	CMS2	NA	NA	NA	NA	NA	GSE17536	CRC_AFFY
GSM437166	C3	51	<=65yr	Male	NA	NA	NA	Stage II	Grade 2	0	33.2	0	33.2	NA	NA	CMS4	NA	NA	NA	NA	NA	GSE17536	CRC_AFFY
GSM437167	C4	69	>65yr	Male	NA	NA	NA	Stage II	Grade 2	0	33.69	0	39.68	NA	NA	CMS1	NA	NA	NA	NA	NA	GSE17536	CRC_AFFY
GSM437168	C1	78	>65yr	Male	NA	NA	NA	Stage II	Grade 2	0	25.61	0	25.61	NA	NA	CMS2	NA	NA	NA	NA	NA	GSE17536	CRC_AFFY
GSM437169	C1	65	<=65yr	Female	NA	NA	NA	Stage II	Grade 2	1	22.38	0	83.99	NA	NA	CMS2	NA	NA	NA	NA	NA	GSE17536	CRC_AFFY
GSM437170	C3	54	<=65yr	Male	NA	NA	NA	Stage II	Grade 2	0	15.05	0	15.05	NA	NA	CMS2	NA	NA	NA	NA	NA	GSE17536	CRC_AFFY
GSM437171	C4	40	<=65yr	Female	NA	NA	NA	Stage II	Grade 1	0	2.26	0	8.38	NA	NA	CMS1	NA	NA	NA	NA	NA	GSE17536	CRC_AFFY
GSM437172	C3	68	>65yr	Male	NA	NA	NA	Stage II	Grade 2	0	18.18	0	18.18	NA	NA	CMS2	NA	NA	NA	NA	NA	GSE17536	CRC_AFFY
GSM437173	C3	52	<=65yr	Female	NA	NA	NA	Stage II	Grade 2	0	27.15	1	27.15	NA	NA	CMS4	NA	NA	NA	NA	NA	GSE17536	CRC_AFFY
GSM437174	C3	46	<=65yr	Male	NA	NA	NA	Stage III	Grade 2	1	11.9	1	24.26	NA	NA	CMS1	NA	NA	NA	NA	NA	GSE17536	CRC_AFFY
GSM437175	C2	39	<=65yr	Male	NA	NA	NA	Stage III	Grade 2	0	105.17	0	105.17	NA	NA	CMS4	NA	NA	NA	NA	NA	GSE17536	CRC_AFFY
GSM437176	C1	38	<=65yr	Male	NA	NA	NA	Stage III	Grade 2	1	8.21	1	11.76	NA	NA	CMS3	NA	NA	NA	NA	NA	GSE17536	CRC_AFFY
GSM437177	C1	26	<=65yr	Male	NA	NA	NA	Stage III	Grade 2	1	29.39	1	70.45	NA	NA	CMS2	NA	NA	NA	NA	NA	GSE17536	CRC_AFFY
GSM437178	C4	71	>65yr	Female	NA	NA	NA	Stage III	Grade 2	0	95.07	0	95.07	NA	NA	CMS1	NA	NA	NA	NA	NA	GSE17536	CRC_AFFY
GSM437179	C1	64	<=65yr	Female	NA	NA	NA	Stage III	Grade 2	0	112.33	0	112.33	NA	NA	CMS2	NA	NA	NA	NA	NA	GSE17536	CRC_AFFY
GSM437180	C3	53	<=65yr	Male	NA	NA	NA	Stage III	Grade 1	1	21.27	1	27.51	NA	NA	CMS3	NA	NA	NA	NA	NA	GSE17536	CRC_AFFY
GSM437181	C2	53	<=65yr	Female	NA	NA	NA	Stage III	Grade 2	1	16.07	1	45.92	NA	NA	CMS4	NA	NA	NA	NA	NA	GSE17536	CRC_AFFY
GSM437182	C3	92	>65yr	Female	NA	NA	NA	Stage III	Grade 2	1	27.74	1	54.04	NA	NA	CMS4	NA	NA	NA	NA	NA	GSE17536	CRC_AFFY
GSM437183	C1	60	<=65yr	Male	NA	NA	NA	Stage III	Grade 1	1	14.72	0	103.98	NA	NA	CMS2	NA	NA	NA	NA	NA	GSE17536	CRC_AFFY
GSM437184	C4	74	>65yr	Male	NA	NA	NA	Stage III	Grade 3	1	5.35	1	6.11	NA	NA	CMS1	NA	NA	NA	NA	NA	GSE17536	CRC_AFFY
GSM437185	C1	48	<=65yr	Female	NA	NA	NA	Stage III	Grade 1	0	99.51	0	99.51	NA	NA	CMS2	NA	NA	NA	NA	NA	GSE17536	CRC_AFFY
GSM437186	C1	63	<=65yr	Male	NA	NA	NA	Stage III	Grade 2	0	20.44	1	20.44	NA	NA	CMS3	NA	NA	NA	NA	NA	GSE17536	CRC_AFFY
GSM437187	C2	58	<=65yr	Male	NA	NA	NA	Stage III	Grade 3	1	27.58	1	76.6	NA	NA	CMS3	NA	NA	NA	NA	NA	GSE17536	CRC_AFFY
GSM437188	C3	75	>65yr	Male	NA	NA	NA	Stage III	Grade 2	1	9.56	1	10.02	NA	NA	CMS4	NA	NA	NA	NA	NA	GSE17536	CRC_AFFY
GSM437189	C3	63	<=65yr	Male	NA	NA	NA	Stage III	Grade 2	1	23.34	1	41.45	NA	NA	CMS4	NA	NA	NA	NA	NA	GSE17536	CRC_AFFY
GSM437190	C3	46	<=65yr	Male	NA	NA	NA	Stage III	Grade 2	0	89.62	0	96.26	NA	NA	CMS4	NA	NA	NA	NA	NA	GSE17536	CRC_AFFY
GSM437191	C2	71	>65yr	Female	NA	NA	NA	Stage III	Grade 2	0	85.61	0	85.61	NA	NA	CMS2	NA	NA	NA	NA	NA	GSE17536	CRC_AFFY
GSM437192	C3	63	<=65yr	Male	NA	NA	NA	Stage III	Grade 2	0	64.33	0	78.87	NA	NA	CMS4	NA	NA	NA	NA	NA	GSE17536	CRC_AFFY
GSM437193	C4	87	>65yr	Female	NA	NA	NA	Stage III	Grade 1	0	22.25	1	22.25	NA	NA	CMS3	NA	NA	NA	NA	NA	GSE17536	CRC_AFFY
GSM437194	C1	63	<=65yr	Male	NA	NA	NA	Stage III	Grade 2	0	74.53	0	74.53	NA	NA	CMS2	NA	NA	NA	NA	NA	GSE17536	CRC_AFFY
GSM437195	C3	87	>65yr	Male	NA	NA	NA	Stage III	Grade 2	0	59.07	1	59.07	NA	NA	CMS4	NA	NA	NA	NA	NA	GSE17536	CRC_AFFY
GSM437196	C4	30	<=65yr	Male	NA	NA	NA	Stage III	Grade 3	0	47.8	1	47.8	NA	NA	CMS1	NA	NA	NA	NA	NA	GSE17536	CRC_AFFY
GSM437197	C3	83	>65yr	Female	NA	NA	NA	Stage III	Grade 2	1	3.32	1	5.68	NA	NA	CMS1	NA	NA	NA	NA	NA	GSE17536	CRC_AFFY
GSM437198	C3	55	<=65yr	Male	NA	NA	NA	Stage III	Grade 1	0	72.09	0	79.39	NA	NA	CMS4	NA	NA	NA	NA	NA	GSE17536	CRC_AFFY
GSM437199	C2	66	>65yr	Male	NA	NA	NA	Stage III	Grade 2	1	24.85	0	74.07	NA	NA	CMS4	NA	NA	NA	NA	NA	GSE17536	CRC_AFFY
GSM437200	C3	69	>65yr	Male	NA	NA	NA	Stage III	Grade 2	1	41.06	1	50.76	NA	NA	CMS4	NA	NA	NA	NA	NA	GSE17536	CRC_AFFY
GSM437201	C3	64	<=65yr	Female	NA	NA	NA	Stage III	Grade 2	1	36.92	1	67.82	NA	NA	CMS4	NA	NA	NA	NA	NA	GSE17536	CRC_AFFY
GSM437202	C3	62	<=65yr	Male	NA	NA	NA	Stage III	Grade 3	0	64.93	0	70.84	NA	NA	CMS1	NA	NA	NA	NA	NA	GSE17536	CRC_AFFY
GSM437203	C4	67	>65yr	Female	NA	NA	NA	Stage III	Grade 3	0	50.59	0	50.59	NA	NA	CMS1	NA	NA	NA	NA	NA	GSE17536	CRC_AFFY
GSM437204	C3	57	<=65yr	Male	NA	NA	NA	Stage III	Grade 2	NA	0	1	34.58	NA	NA	CMS4	NA	NA	NA	NA	NA	GSE17536	CRC_AFFY
GSM437205	C2	73	>65yr	Female	NA	NA	NA	Stage III	Grade 2	0	38.72	1	38.72	NA	NA	CMS2	NA	NA	NA	NA	NA	GSE17536	CRC_AFFY
GSM437206	C1	83	>65yr	Female	NA	NA	NA	Stage III	Grade 2	0	54.9	1	54.9	NA	NA	CMS2	NA	NA	NA	NA	NA	GSE17536	CRC_AFFY
GSM437207	C1	65	<=65yr	Female	NA	NA	NA	Stage III	Grade 2	0	65.55	0	67.92	NA	NA	UNKNOWN	NA	NA	NA	NA	NA	GSE17536	CRC_AFFY
GSM437208	C1	63	<=65yr	Female	NA	NA	NA	Stage III	Grade 2	0	58.45	0	58.45	NA	NA	CMS2	NA	NA	NA	NA	NA	GSE17536	CRC_AFFY
GSM437209	C4	69	>65yr	Male	NA	NA	NA	Stage III	Grade 3	0	59.34	0	59.34	NA	NA	CMS1	NA	NA	NA	NA	NA	GSE17536	CRC_AFFY
GSM437210	C3	71	>65yr	Female	NA	NA	NA	Stage III	Grade 2	0	26.92	0	54.54	NA	NA	CMS1	NA	NA	NA	NA	NA	GSE17536	CRC_AFFY
GSM437211	C4	51	<=65yr	Female	NA	NA	NA	Stage III	Grade 3	1	8.58	1	19.03	NA	NA	CMS1	NA	NA	NA	NA	NA	GSE17536	CRC_AFFY
GSM437212	C4	78	>65yr	Female	NA	NA	NA	Stage III	Grade 3	0	26.26	1	26.26	NA	NA	CMS1	NA	NA	NA	NA	NA	GSE17536	CRC_AFFY
GSM437213	C1	72	>65yr	Male	NA	NA	NA	Stage III	Grade 3	0	52.86	0	52.86	NA	NA	UNKNOWN	NA	NA	NA	NA	NA	GSE17536	CRC_AFFY
GSM437214	C2	46	<=65yr	Male	NA	NA	NA	Stage III	Grade 2	1	21.04	1	32.05	NA	NA	CMS4	NA	NA	NA	NA	NA	GSE17536	CRC_AFFY
GSM437215	C2	67	>65yr	Male	NA	NA	NA	Stage III	Grade 2	0	44.67	0	55.95	NA	NA	CMS2	NA	NA	NA	NA	NA	GSE17536	CRC_AFFY
GSM437216	C1	67	>65yr	Male	NA	NA	NA	Stage III	Grade 3	0	36.92	0	56.67	NA	NA	CMS3	NA	NA	NA	NA	NA	GSE17536	CRC_AFFY
GSM437217	C1	26	<=65yr	Male	NA	NA	NA	Stage III	Grade 2	0	50.43	0	50.43	NA	NA	CMS2	NA	NA	NA	NA	NA	GSE17536	CRC_AFFY
GSM437218	C1	78	>65yr	Female	NA	NA	NA	Stage III	Grade 2	0	4.24	1	4.24	NA	NA	CMS1	NA	NA	NA	NA	NA	GSE17536	CRC_AFFY
GSM437219	C4	71	>65yr	Female	NA	NA	NA	Stage III	Grade 2	0	49.11	0	49.11	NA	NA	CMS2	NA	NA	NA	NA	NA	GSE17536	CRC_AFFY
GSM437220	C4	60	<=65yr	Female	NA	NA	NA	Stage III	Grade 2	0	38.07	0	49.57	NA	NA	UNKNOWN	NA	NA	NA	NA	NA	GSE17536	CRC_AFFY
GSM437221	C4	46	<=65yr	Male	NA	NA	NA	Stage III	Grade 2	0	44.74	0	50.49	NA	NA	CMS2	NA	NA	NA	NA	NA	GSE17536	CRC_AFFY
GSM437222	C3	41	<=65yr	Male	NA	NA	NA	Stage III	Grade 2	1	34.19	0	63.05	NA	NA	CMS4	NA	NA	NA	NA	NA	GSE17536	CRC_AFFY
GSM437223	C3	75	>65yr	Female	NA	NA	NA	Stage III	Grade 2	1	24.13	1	49.24	NA	NA	CMS1	NA	NA	NA	NA	NA	GSE17536	CRC_AFFY
GSM437224	C3	54	<=65yr	Male	NA	NA	NA	Stage III	Grade 2	0	0.92	0	0.92	NA	NA	CMS1	NA	NA	NA	NA	NA	GSE17536	CRC_AFFY
GSM437225	C4	78	>65yr	Female	NA	NA	NA	Stage III	Grade 2	0	31.36	0	31.36	NA	NA	CMS1	NA	NA	NA	NA	NA	GSE17536	CRC_AFFY
GSM437226	C2	61	<=65yr	Female	NA	NA	NA	Stage III	Grade 2	0	18.96	0	40.3	NA	NA	CMS4	NA	NA	NA	NA	NA	GSE17536	CRC_AFFY
GSM437227	C3	74	>65yr	Male	NA	NA	NA	Stage III	Grade 2	1	85.84	0	116.64	NA	NA	CMS2	NA	NA	NA	NA	NA	GSE17536	CRC_AFFY
GSM437228	C1	79	>65yr	Female	NA	NA	NA	Stage III	Grade 2	0	31.92	0	31.92	NA	NA	CMS2	NA	NA	NA	NA	NA	GSE17536	CRC_AFFY
GSM437229	C4	81	>65yr	Female	NA	NA	NA	Stage III	Grade 3	0	19.98	0	19.98	NA	NA	UNKNOWN	NA	NA	NA	NA	NA	GSE17536	CRC_AFFY
GSM437230	C1	62	<=65yr	Female	NA	NA	NA	Stage III	Grade 2	0	5.22	0	24.62	NA	NA	CMS2	NA	NA	NA	NA	NA	GSE17536	CRC_AFFY
GSM437231	C3	64	<=65yr	Male	NA	NA	NA	Stage IV	Grade 2	NA	0	1	18.54	NA	NA	CMS4	NA	NA	NA	NA	NA	GSE17536	CRC_AFFY
GSM437232	C1	72	>65yr	Female	NA	NA	NA	Stage IV	Grade 2	0	117.3	0	130.75	NA	NA	CMS3	NA	NA	NA	NA	NA	GSE17536	CRC_AFFY
GSM437233	C3	59	<=65yr	Female	NA	NA	NA	Stage IV	Grade 1	NA	0	1	17.62	NA	NA	CMS4	NA	NA	NA	NA	NA	GSE17536	CRC_AFFY
GSM437234	C3	46	<=65yr	Male	NA	NA	NA	Stage IV	Grade 2	NA	0	1	5.32	NA	NA	CMS4	NA	NA	NA	NA	NA	GSE17536	CRC_AFFY
GSM437235	C3	69	>65yr	Male	NA	NA	NA	Stage IV	Grade 3	NA	0	1	2.36	NA	NA	CMS4	NA	NA	NA	NA	NA	GSE17536	CRC_AFFY
GSM437236	C1	73	>65yr	Male	NA	NA	NA	Stage IV	Grade 2	NA	0	1	5.72	NA	NA	UNKNOWN	NA	NA	NA	NA	NA	GSE17536	CRC_AFFY
GSM437237	C1	66	>65yr	Male	NA	NA	NA	Stage IV	Grade 2	NA	0	1	15.28	NA	NA	CMS2	NA	NA	NA	NA	NA	GSE17536	CRC_AFFY
GSM437238	C1	54	<=65yr	Male	NA	NA	NA	Stage IV	Grade 2	0	82.61	0	95.07	NA	NA	CMS3	NA	NA	NA	NA	NA	GSE17536	CRC_AFFY
GSM437239	C3	88	>65yr	Male	NA	NA	NA	Stage IV	Grade 2	NA	0	1	4.96	NA	NA	CMS4	NA	NA	NA	NA	NA	GSE17536	CRC_AFFY
GSM437240	C1	58	<=65yr	Male	NA	NA	NA	Stage IV	Grade 2	NA	0	1	28.89	NA	NA	CMS2	NA	NA	NA	NA	NA	GSE17536	CRC_AFFY
GSM437241	C3	82	>65yr	Female	NA	NA	NA	Stage IV	Grade 3	NA	0	1	3.25	NA	NA	CMS4	NA	NA	NA	NA	NA	GSE17536	CRC_AFFY
GSM437242	C1	58	<=65yr	Female	NA	NA	NA	Stage IV	Grade 3	NA	0	1	0.92	NA	NA	CMS3	NA	NA	NA	NA	NA	GSE17536	CRC_AFFY
GSM437243	C3	69	>65yr	Male	NA	NA	NA	Stage IV	Grade 2	1	10.61	1	18.77	NA	NA	CMS4	NA	NA	NA	NA	NA	GSE17536	CRC_AFFY
GSM437244	C1	51	<=65yr	Male	NA	NA	NA	Stage IV	Grade 2	NA	0	1	57.73	NA	NA	CMS2	NA	NA	NA	NA	NA	GSE17536	CRC_AFFY
GSM437245	C3	70	>65yr	Female	NA	NA	NA	Stage IV	Grade 2	NA	0	1	14.39	NA	NA	CMS4	NA	NA	NA	NA	NA	GSE17536	CRC_AFFY
GSM437246	C1	82	>65yr	Female	NA	NA	NA	Stage IV	Grade 2	NA	0	1	5.12	NA	NA	CMS2	NA	NA	NA	NA	NA	GSE17536	CRC_AFFY
GSM437247	C1	60	<=65yr	Male	NA	NA	NA	Stage IV	Grade 3	NA	0	1	4.99	NA	NA	CMS2	NA	NA	NA	NA	NA	GSE17536	CRC_AFFY
GSM437248	C1	52	<=65yr	Male	NA	NA	NA	Stage IV	Grade 3	1	24.88	1	33.17	NA	NA	CMS2	NA	NA	NA	NA	NA	GSE17536	CRC_AFFY
GSM437249	C1	59	<=65yr	Male	NA	NA	NA	Stage IV	Grade 2	0	50.53	1	50.53	NA	NA	CMS2	NA	NA	NA	NA	NA	GSE17536	CRC_AFFY
GSM437250	C2	56	<=65yr	Male	NA	NA	NA	Stage IV	Grade 3	NA	0	1	5.72	NA	NA	CMS4	NA	NA	NA	NA	NA	GSE17536	CRC_AFFY
GSM437251	C3	63	<=65yr	Male	NA	NA	NA	Stage IV	Grade 2	NA	0	1	8.02	NA	NA	CMS4	NA	NA	NA	NA	NA	GSE17536	CRC_AFFY
GSM437252	C2	65	<=65yr	Female	NA	NA	NA	Stage IV	Grade 2	NA	0	1	34.02	NA	NA	UNKNOWN	NA	NA	NA	NA	NA	GSE17536	CRC_AFFY
GSM437253	C1	54	<=65yr	Male	NA	NA	NA	Stage IV	Grade 3	NA	0	1	1.44	NA	NA	CMS1	NA	NA	NA	NA	NA	GSE17536	CRC_AFFY
GSM437254	C4	76	>65yr	Male	NA	NA	NA	Stage IV	Grade 3	NA	0	1	36.95	NA	NA	CMS4	NA	NA	NA	NA	NA	GSE17536	CRC_AFFY
GSM437255	C2	58	<=65yr	Female	NA	NA	NA	Stage IV	Grade 2	0	55.19	0	60.75	NA	NA	CMS3	NA	NA	NA	NA	NA	GSE17536	CRC_AFFY
GSM437256	C4	69	>65yr	Female	NA	NA	NA	Stage IV	Grade 2	NA	0	1	37.44	NA	NA	UNKNOWN	NA	NA	NA	NA	NA	GSE17536	CRC_AFFY
GSM437257	C3	42	<=65yr	Female	NA	NA	NA	Stage IV	Grade 2	NA	0	1	23.07	NA	NA	CMS4	NA	NA	NA	NA	NA	GSE17536	CRC_AFFY
GSM437258	C2	78	>65yr	Female	NA	NA	NA	Stage IV	Grade 2	NA	0	1	19.85	NA	NA	UNKNOWN	NA	NA	NA	NA	NA	GSE17536	CRC_AFFY
GSM437259	C2	51	<=65yr	Male	NA	NA	NA	Stage IV	Grade 2	NA	0	0	31.85	NA	NA	UNKNOWN	NA	NA	NA	NA	NA	GSE17536	CRC_AFFY
GSM437260	C2	63	<=65yr	Male	NA	NA	NA	Stage IV	Grade 2	NA	0	1	8.61	NA	NA	UNKNOWN	NA	NA	NA	NA	NA	GSE17536	CRC_AFFY
GSM437261	C4	66	>65yr	Male	NA	NA	NA	Stage IV	Grade 2	1	13.08	0	42.27	NA	NA	CMS2	NA	NA	NA	NA	NA	GSE17536	CRC_AFFY
GSM437262	C3	73	>65yr	Male	NA	NA	NA	Stage IV	Grade 2	NA	0	1	15.25	NA	NA	CMS4	NA	NA	NA	NA	NA	GSE17536	CRC_AFFY
GSM437263	C3	62	<=65yr	Male	NA	NA	NA	Stage IV	Grade 2	NA	0	1	14.56	NA	NA	CMS4	NA	NA	NA	NA	NA	GSE17536	CRC_AFFY
GSM437264	C1	82	>65yr	Female	NA	NA	NA	Stage IV	Grade 2	0	9.96	1	9.96	NA	NA	CMS2	NA	NA	NA	NA	NA	GSE17536	CRC_AFFY
GSM437265	C3	76	>65yr	Male	NA	NA	NA	Stage IV	Grade 2	0	8.94	1	8.94	NA	NA	CMS4	NA	NA	NA	NA	NA	GSE17536	CRC_AFFY
GSM437266	C2	78	>65yr	Female	NA	NA	NA	Stage IV	Grade 3	1	17.32	0	32.67	NA	NA	CMS3	NA	NA	NA	NA	NA	GSE17536	CRC_AFFY
GSM437267	C1	66	>65yr	Female	NA	NA	NA	Stage IV	Grade 3	NA	0	1	2.07	NA	NA	CMS3	NA	NA	NA	NA	NA	GSE17536	CRC_AFFY
GSM437268	C1	68	>65yr	Male	NA	NA	NA	Stage IV	Grade 2	NA	0	1	22.78	NA	NA	CMS2	NA	NA	NA	NA	NA	GSE17536	CRC_AFFY
GSM437269	C1	47	<=65yr	Male	NA	NA	NA	Stage IV	Grade 2	NA	0	0	22.35	NA	NA	CMS2	NA	NA	NA	NA	NA	GSE17536	CRC_AFFY
GSM820048	C3	41.6	<=65yr	Male	T3	N0	M0	Stage II	Grade 2	0	66.6667	NA	NA	MSS	CIMP.Neg	CMS2	NA	NA	0	0	col001	GSE33113	CRC_AFFY
GSM820049	C1	66.1	>65yr	Male	T3	N0	M0	Stage II	Grade 2	0	4.66667	NA	NA	MSS	CIMP.Neg	CMS2	NA	NA	0	0	col002	GSE33113	CRC_AFFY
GSM820050	C4	80.2	>65yr	Male	T3	N0	M0	Stage II	Grade 1	0	2.06667	NA	NA	MSI	CIMP.High	CMS3	NA	NA	0	1	col003	GSE33113	CRC_AFFY
GSM820051	C1	87.4	>65yr	Male	T3	N0	M0	Stage II	Grade 2	1	27.7333	NA	NA	MSI	CIMP.High	CMS3	NA	NA	0	1	col004	GSE33113	CRC_AFFY
GSM820052	C1	60.5	<=65yr	Female	T3	N0	M0	Stage II	Grade 2	0	39.1667	NA	NA	MSS	CIMP.Neg	CMS2	NA	NA	0	0	col005	GSE33113	CRC_AFFY
GSM820053	C1	76.6	>65yr	Male	T3	N0	M0	Stage II	NA	0	51.3667	NA	NA	MSS	CIMP.Neg	CMS2	NA	NA	0	0	col006	GSE33113	CRC_AFFY
GSM820054	C3	61.3	<=65yr	Male	T3	N0	M0	Stage II	Grade 2	0	53.7667	NA	NA	MSS	CIMP.Neg	CMS2	NA	NA	0	0	col007	GSE33113	CRC_AFFY
GSM820055	C4	82.2	>65yr	Female	T3	N0	M0	Stage II	Grade 3	0	24.9333	NA	NA	MSI	CIMP.High	CMS1	NA	NA	0	0	col008	GSE33113	CRC_AFFY
GSM820056	C4	92.2	>65yr	Female	T3	N0	M0	Stage II	Grade 2	0	51.5	NA	NA	MSI	CIMP.High	CMS1	NA	NA	0	1	col009	GSE33113	CRC_AFFY
GSM820057	C2	54.6	<=65yr	Female	T3	N0	M0	Stage II	Grade 2	0	39.1667	NA	NA	MSS	CIMP.Neg	CMS2	NA	NA	0	0	col010	GSE33113	CRC_AFFY
GSM820058	C2	73.4	>65yr	Female	T4	N0	M0	Stage II	Grade 2	1	21.9	NA	NA	MSS	CIMP.Neg	CMS2	NA	NA	1	0	col011	GSE33113	CRC_AFFY
GSM820059	C3	55.2	<=65yr	Male	T3	N0	M0	Stage II	Grade 3	0	37.9	NA	NA	MSI	CIMP.Neg	CMS4	NA	NA	0	0	col012	GSE33113	CRC_AFFY
GSM820060	C3	82.7	>65yr	Female	T3	N0	M0	Stage II	Grade 3	0	16.6333	NA	NA	MSI	CIMP.Neg	CMS1	NA	NA	0	0	col013	GSE33113	CRC_AFFY
GSM820061	C3	84.4	>65yr	Female	T3	N0	M0	Stage II	Grade 3	0	49	NA	NA	MSS	CIMP.Neg	CMS4	NA	NA	1	0	col014	GSE33113	CRC_AFFY
GSM820062	C1	50.1	<=65yr	Male	T3	N0	M0	Stage II	Grade 2	0	47.7667	NA	NA	MSS	CIMP.Neg	CMS2	NA	NA	1	0	col015	GSE33113	CRC_AFFY
GSM820063	C1	47.7	<=65yr	Female	T3	N0	M0	Stage II	Grade 2	0	93.6667	NA	NA	MSI	CIMP.Neg	CMS1	NA	NA	1	0	col016	GSE33113	CRC_AFFY
GSM820064	C4	64.9	<=65yr	Female	T3	N0	M0	Stage II	Grade 2	0	95.6	NA	NA	MSS	CIMP.Neg	CMS2	NA	NA	0	0	col017	GSE33113	CRC_AFFY
GSM820065	C3	75.5	>65yr	Female	T3	N0	M0	Stage II	Grade 2	0	59.1333	NA	NA	MSS	CIMP.Neg	CMS2	NA	NA	1	0	col018	GSE33113	CRC_AFFY
GSM820066	C2	76.2	>65yr	Female	T3	N0	M0	Stage II	Grade 3	0	64.2667	NA	NA	MSS	CIMP.Neg	CMS3	NA	NA	0	0	col019	GSE33113	CRC_AFFY
GSM820067	C3	65.7	>65yr	Female	T3	N0	M0	Stage II	Grade 2	1	35.3333	NA	NA	MSI	CIMP.High	CMS1	NA	NA	0	1	col020	GSE33113	CRC_AFFY
GSM820068	C1	86.4	>65yr	Female	T3	N0	M0	Stage II	Grade 2	0	30.9667	NA	NA	MSI	CIMP.Neg	CMS1	NA	NA	0	0	col021	GSE33113	CRC_AFFY
GSM820069	C2	48	<=65yr	Male	T3	N0	M0	Stage II	Grade 2	0	118.333	NA	NA	MSS	CIMP.Neg	CMS3	NA	NA	1	0	col022	GSE33113	CRC_AFFY
GSM820070	C1	76.4	>65yr	Male	T3	N0	M0	Stage II	Grade 2	0	44.3	NA	NA	MSS	CIMP.Neg	CMS2	NA	NA	0	0	col023	GSE33113	CRC_AFFY
GSM820071	C4	76.2	>65yr	Male	T3	N0	M0	Stage II	Grade 3	1	6.8	NA	NA	MSI	CIMP.High	UNKNOWN	NA	NA	0	0	col024	GSE33113	CRC_AFFY
GSM820072	C3	60.1	<=65yr	Female	T3	N0	M0	Stage II	Grade 3	1	11.9	NA	NA	MSS	CIMP.Neg	CMS4	NA	NA	1	0	col026	GSE33113	CRC_AFFY
GSM820073	C2	82	>65yr	Female	T3	N0	M0	Stage II	Grade 2	0	33.1333	NA	NA	MSS	CIMP.Neg	CMS2	NA	NA	0	0	col033	GSE33113	CRC_AFFY
GSM820074	C4	79.1	>65yr	Male	T3	N0	M0	Stage II	Grade 2	0	47.1	NA	NA	MSS	CIMP.Neg	CMS2	NA	NA	0	0	col034	GSE33113	CRC_AFFY
GSM820075	C4	67.1	>65yr	Male	T3	N0	M0	Stage II	Grade 3	0	71.9	NA	NA	MSI	CIMP.High	CMS1	NA	NA	0	0	col035	GSE33113	CRC_AFFY
GSM820076	C2	71.9	>65yr	Female	T3	N0	M0	Stage II	Grade 3	0	65.9	NA	NA	MSS	CIMP.High	CMS4	NA	NA	0	0	col036	GSE33113	CRC_AFFY
GSM820077	C2	64.6	<=65yr	Male	T3	N0	M0	Stage II	Grade 2	0	60.2333	NA	NA	MSS	CIMP.Neg	CMS4	NA	NA	1	0	col037	GSE33113	CRC_AFFY
GSM820078	C1	95.1	>65yr	Female	T3	N0	M0	Stage II	Grade 2	0	14.8667	NA	NA	MSS	CIMP.Neg	CMS2	NA	NA	0	0	col038	GSE33113	CRC_AFFY
GSM820079	C1	71.8	>65yr	Female	T3	N0	M0	Stage II	Grade 2	0	61.9667	NA	NA	MSS	CIMP.Neg	CMS3	NA	NA	1	0	col039	GSE33113	CRC_AFFY
GSM820080	C4	76.8	>65yr	Female	T3	N0	M0	Stage II	Grade 2	0	75.7667	NA	NA	MSI	CIMP.High	CMS1	NA	NA	0	1	col040	GSE33113	CRC_AFFY
GSM820081	C3	57.7	<=65yr	Male	T3	N0	M0	Stage II	Grade 2	0	65.3	NA	NA	MSS	CIMP.Neg	CMS4	NA	NA	0	0	col041	GSE33113	CRC_AFFY
GSM820082	C1	78.3	>65yr	Male	T4	N0	M0	Stage II	Grade 2	1	42.6	NA	NA	MSS	CIMP.Neg	UNKNOWN	NA	NA	0	0	col044	GSE33113	CRC_AFFY
GSM820083	C3	75.3	>65yr	Male	T3	N0	M0	Stage II	Grade 2	1	8.96667	NA	NA	MSS	CIMP.Neg	CMS4	NA	NA	1	0	col045	GSE33113	CRC_AFFY
GSM820084	C3	83.2	>65yr	Female	T3	N0	M0	Stage II	Grade 2	0	118.5	NA	NA	MSS	CIMP.Neg	CMS2	NA	NA	0	0	col046	GSE33113	CRC_AFFY
GSM820085	C3	57.8	<=65yr	Male	T3	N0	M0	Stage II	Grade 2	0	119.967	NA	NA	MSS	CIMP.Neg	CMS2	NA	NA	0	0	col047	GSE33113	CRC_AFFY
GSM820086	C1	90.6	>65yr	Female	T3	N0	M0	Stage II	Grade 2	0	32.4667	NA	NA	MSS	CIMP.Neg	CMS2	NA	NA	0	0	col048	GSE33113	CRC_AFFY
GSM820087	C3	94.6	>65yr	Male	T3	N0	M0	Stage II	Grade 2	0	49.1	NA	NA	MSS	CIMP.Neg	CMS2	NA	NA	0	0	col049	GSE33113	CRC_AFFY
GSM820088	C3	68.6	>65yr	Female	T3	N0	M0	Stage II	Grade 2	1	14.8667	NA	NA	MSS	CIMP.Neg	CMS4	NA	NA	1	0	col050	GSE33113	CRC_AFFY
GSM820089	C1	75.9	>65yr	Male	T3	N0	M0	Stage II	Grade 2	0	7.86667	NA	NA	MSS	CIMP.Neg	CMS2	NA	NA	1	0	col051	GSE33113	CRC_AFFY
GSM820090	C4	57.3	<=65yr	Female	T3	N0	M0	Stage II	Grade 3	1	11.0667	NA	NA	MSI	CIMP.Neg	CMS4	NA	NA	0	0	col052	GSE33113	CRC_AFFY
GSM820091	C3	54.1	<=65yr	Female	T3	N0	M0	Stage II	Grade 3	1	14.5667	NA	NA	MSS	CIMP.High	CMS1	NA	NA	0	1	col053	GSE33113	CRC_AFFY
GSM820092	C2	50.8	<=65yr	Female	T3	N0	M0	Stage II	Grade 2	1	14.6	NA	NA	MSS	CIMP.Neg	CMS3	NA	NA	0	0	col054	GSE33113	CRC_AFFY
GSM820093	C1	78.8	>65yr	Female	T4	N0	M0	Stage II	Grade 3	0	33.5333	NA	NA	MSS	CIMP.Neg	CMS2	NA	NA	0	0	col055	GSE33113	CRC_AFFY
GSM820094	C3	46.4	<=65yr	Male	T3	N0	M0	Stage II	Grade 2	0	26.7667	NA	NA	MSS	CIMP.Neg	CMS4	NA	NA	0	0	col056	GSE33113	CRC_AFFY
GSM820095	C1	74.6	>65yr	Female	T3	N0	M0	Stage II	Grade 2	0	80.4667	NA	NA	MSS	CIMP.Neg	CMS2	NA	NA	0	0	col057	GSE33113	CRC_AFFY
GSM820096	C3	68.9	>65yr	Female	T3	N0	M0	Stage II	Grade 2	0	39.1333	NA	NA	MSI	CIMP.Neg	CMS1	NA	NA	1	0	col058	GSE33113	CRC_AFFY
GSM820097	C2	34.6	<=65yr	Female	T3	N0	M0	Stage II	Grade 1	1	13.0333	NA	NA	MSS	CIMP.Neg	CMS4	NA	NA	0	0	col059	GSE33113	CRC_AFFY
GSM820098	C4	79.3	>65yr	Female	T3	N0	M0	Stage II	Grade 3	0	102.167	NA	NA	MSI	CIMP.High	CMS1	NA	NA	0	1	col060	GSE33113	CRC_AFFY
GSM820099	C3	78.1	>65yr	Male	T3	N0	M0	Stage II	Grade 3	0	15.8	NA	NA	MSI	CIMP.High	CMS4	NA	NA	0	1	col061	GSE33113	CRC_AFFY
GSM820100	C3	80.4	>65yr	Female	T3	N0	M0	Stage II	Grade 2	0	15.2333	NA	NA	MSS	CIMP.Neg	CMS4	NA	NA	1	0	col062	GSE33113	CRC_AFFY
GSM820101	C1	80.6	>65yr	Male	T4	N0	M0	Stage II	Grade 2	0	42	NA	NA	MSS	CIMP.High	CMS3	NA	NA	1	0	col063	GSE33113	CRC_AFFY
GSM820102	C3	77.1	>65yr	Female	T4	N0	M0	Stage II	Grade 3	0	1.8	NA	NA	MSI	CIMP.Neg	CMS4	NA	NA	0	0	col064	GSE33113	CRC_AFFY
GSM820103	C1	63.5	<=65yr	Male	T3	N0	M0	Stage II	Grade 2	0	66.1	NA	NA	MSS	CIMP.Neg	CMS2	NA	NA	0	0	col065	GSE33113	CRC_AFFY
GSM820104	C3	77.8	>65yr	Male	T4	N0	M0	Stage II	Grade 2	0	55.5667	NA	NA	MSS	CIMP.Neg	CMS4	NA	NA	1	0	col066	GSE33113	CRC_AFFY
GSM820105	C1	57	<=65yr	Female	T3	N0	M0	Stage II	Grade 3	0	71.3667	NA	NA	MSI	CIMP.High	CMS1	NA	NA	0	1	col067	GSE33113	CRC_AFFY
GSM820106	C1	74.1	>65yr	Male	T3	N0	M0	Stage II	Grade 3	0	42.7	NA	NA	MSS	CIMP.Neg	CMS3	NA	NA	1	0	col068	GSE33113	CRC_AFFY
GSM820107	C2	55.2	<=65yr	Female	T3	N0	M0	Stage II	Grade 3	1	13.6333	NA	NA	MSS	CIMP.Neg	CMS3	NA	NA	0	1	col069	GSE33113	CRC_AFFY
GSM820108	C1	75.7	>65yr	Male	T3	N0	M0	Stage II	Grade 2	0	1.86667	NA	NA	MSS	CIMP.Neg	CMS2	NA	NA	0	0	col070	GSE33113	CRC_AFFY
GSM820109	C3	77.3	>65yr	Female	T3	N0	M0	Stage II	Grade 2	0	54.6667	NA	NA	MSS	CIMP.Neg	CMS4	NA	NA	0	0	col072	GSE33113	CRC_AFFY
GSM820110	C1	80.8	>65yr	Male	T3	N0	M0	Stage II	NA	0	32.3667	NA	NA	MSS	CIMP.Neg	CMS3	NA	NA	1	0	col073	GSE33113	CRC_AFFY
GSM820111	C2	74.7	>65yr	Male	T3	N0	M0	Stage II	Grade 2	0	39.6333	NA	NA	MSS	CIMP.Neg	CMS2	NA	NA	0	0	col074	GSE33113	CRC_AFFY
GSM820112	C2	76.6	>65yr	Female	T3	N0	M0	Stage II	Grade 3	0	39.4667	NA	NA	MSS	CIMP.High	CMS4	NA	NA	0	0	col075	GSE33113	CRC_AFFY
GSM820113	C1	69.5	>65yr	Female	T3	N0	M0	Stage II	Grade 2	0	59.5	NA	NA	MSS	CIMP.Neg	CMS2	NA	NA	0	0	col076	GSE33113	CRC_AFFY
GSM820114	C2	63.1	<=65yr	Male	T3	N0	M0	Stage II	Grade 2	0	61.2333	NA	NA	MSS	CIMP.Neg	CMS3	NA	NA	0	0	col077	GSE33113	CRC_AFFY
GSM820115	C1	81.4	>65yr	Male	T3	N0	M0	Stage II	Grade 2	0	61.4667	NA	NA	MSS	CIMP.Neg	CMS2	NA	NA	0	0	col078	GSE33113	CRC_AFFY
GSM820116	C1	72.5	>65yr	Male	T3	N0	M0	Stage II	Grade 2	1	9.1	NA	NA	MSS	CIMP.Neg	UNKNOWN	NA	NA	0	0	col079	GSE33113	CRC_AFFY
GSM820117	C3	64	<=65yr	Male	T3	N0	M0	Stage II	Grade 3	1	17.9333	NA	NA	MSS	CIMP.Neg	CMS4	NA	NA	0	0	col080	GSE33113	CRC_AFFY
GSM820118	C4	88	>65yr	Female	T3	N0	M0	Stage II	Grade 3	0	53.6	NA	NA	MSI	CIMP.High	CMS1	NA	NA	0	1	col081	GSE33113	CRC_AFFY
GSM820119	C3	74	>65yr	Female	T3	N0	M0	Stage II	Grade 2	1	21.1333	NA	NA	MSS	CIMP.High	CMS1	NA	NA	0	1	col082	GSE33113	CRC_AFFY
GSM820120	C2	76	>65yr	Female	T3	N0	M0	Stage II	Grade 3	0	24.5333	NA	NA	MSS	CIMP.Neg	CMS2	NA	NA	1	0	col083	GSE33113	CRC_AFFY
GSM820121	C4	66.9	>65yr	Female	T3	N0	M0	Stage II	Grade 3	0	45.9333	NA	NA	MSI	CIMP.High	CMS1	NA	NA	0	1	col084	GSE33113	CRC_AFFY
GSM820122	C4	54	<=65yr	Male	T3	N0	M0	Stage II	Grade 2	0	52.7333	NA	NA	MSI	CIMP.High	CMS4	NA	NA	0	0	col085	GSE33113	CRC_AFFY
GSM820123	C4	63.9	<=65yr	Male	T4	N0	M0	Stage II	Grade 2	1	14.9	NA	NA	MSS	CIMP.Neg	CMS2	NA	NA	0	0	col086	GSE33113	CRC_AFFY
GSM820124	C3	61.5	<=65yr	Female	T3	N0	M0	Stage II	Grade 2	0	43.2	NA	NA	MSS	CIMP.Neg	CMS2	NA	NA	0	0	col089	GSE33113	CRC_AFFY
GSM820125	C1	86.1	>65yr	Male	T3	N0	M0	Stage II	Grade 2	0	29.7667	NA	NA	MSS	CIMP.High	CMS2	NA	NA	0	0	col090	GSE33113	CRC_AFFY
GSM820126	C4	84.6	>65yr	Female	T3	N0	M0	Stage II	Grade 3	0	40.6333	NA	NA	MSI	CIMP.High	UNKNOWN	NA	NA	0	1	col091	GSE33113	CRC_AFFY
GSM820127	C3	86	>65yr	Male	T3	N0	M0	Stage II	Grade 2	1	6.66667	NA	NA	MSS	CIMP.Neg	CMS4	NA	NA	1	0	col092	GSE33113	CRC_AFFY
GSM820128	C1	71.3	>65yr	Female	T3	N0	M0	Stage II	Grade 2	0	43.9667	NA	NA	MSI	CIMP.High	CMS1	NA	NA	0	1	col093	GSE33113	CRC_AFFY
GSM820129	C2	87.1	>65yr	Male	T3	N0	M0	Stage II	Grade 2	0	11.4667	NA	NA	MSS	CIMP.Neg	CMS2	NA	NA	0	0	col094	GSE33113	CRC_AFFY
GSM820130	C2	52.5	<=65yr	Male	T3	N0	M0	Stage II	Grade 2	0	41	NA	NA	MSS	CIMP.High	CMS2	NA	NA	0	0	col095	GSE33113	CRC_AFFY
GSM820131	C3	61.9	<=65yr	Male	T3	N0	M0	Stage II	Grade 2	0	38.2333	NA	NA	MSS	CIMP.High	CMS1	NA	NA	0	1	col096	GSE33113	CRC_AFFY
GSM820132	C1	61.8	<=65yr	Male	T3	N0	M0	Stage II	Grade 2	0	34.7333	NA	NA	MSS	CIMP.Neg	CMS2	NA	NA	0	0	col097	GSE33113	CRC_AFFY
GSM820133	C3	48.8	<=65yr	Male	T3	N0	M0	Stage II	Grade 2	0	36.4667	NA	NA	MSS	CIMP.Neg	CMS4	NA	NA	0	0	col098	GSE33113	CRC_AFFY
GSM820134	C1	68.8	>65yr	Female	T3	N0	M0	Stage II	NA	0	35.3667	NA	NA	MSI	CIMP.High	CMS3	NA	NA	0	0	col099	GSE33113	CRC_AFFY
GSM820135	C4	81.4	>65yr	Female	T3	N0	M0	Stage II	Grade 3	1	1.66667	NA	NA	MSI	CIMP.High	CMS1	NA	NA	0	1	col100	GSE33113	CRC_AFFY
GSM820136	C3	77.8	>65yr	Female	T3	N0	M0	Stage II	Grade 2	0	47.7	NA	NA	MSS	CIMP.Neg	CMS4	NA	NA	0	0	col101	GSE33113	CRC_AFFY
GSM820137	C1	49.2	<=65yr	Female	T3	N0	M0	Stage II	Grade 2	0	47.6	NA	NA	MSS	CIMP.Neg	CMS2	NA	NA	0	0	col102	GSE33113	CRC_AFFY
GSM929494	C1	70	>65yr	Male	NA	NA	NA	Stage II	NA	0	56.8333	NA	NA	NA	NA	CMS2	Left	NA	NA	NA	NA	GSE37892	CRC_AFFY
GSM929495	C4	46	<=65yr	Male	NA	NA	NA	Stage II	NA	0	40.3667	NA	NA	NA	NA	CMS2	Left	NA	NA	NA	NA	GSE37892	CRC_AFFY
GSM929496	C1	58	<=65yr	Female	NA	NA	NA	Stage III	NA	1	5.5	NA	NA	NA	NA	CMS4	Left	NA	NA	NA	NA	GSE37892	CRC_AFFY
GSM929497	C4	59	<=65yr	Female	NA	NA	NA	Stage III	NA	1	6.96667	NA	NA	NA	NA	CMS3	Left	NA	NA	NA	NA	GSE37892	CRC_AFFY
GSM929498	C1	62	<=65yr	Male	NA	NA	NA	Stage III	NA	1	38	NA	NA	NA	NA	CMS2	Left	NA	NA	NA	NA	GSE37892	CRC_AFFY
GSM929499	C2	55	<=65yr	Male	NA	NA	NA	Stage III	NA	1	32.1667	NA	NA	NA	NA	CMS4	Right	NA	NA	NA	NA	GSE37892	CRC_AFFY
GSM929500	C3	74	>65yr	Male	NA	NA	NA	Stage III	NA	1	57.3667	NA	NA	NA	NA	CMS1	Left	NA	NA	NA	NA	GSE37892	CRC_AFFY
GSM929501	C2	66	>65yr	Female	NA	NA	NA	Stage III	NA	0	58.5667	NA	NA	NA	NA	CMS4	Right	NA	NA	NA	NA	GSE37892	CRC_AFFY
GSM929502	C4	54	<=65yr	Male	NA	NA	NA	Stage III	NA	1	6.63333	NA	NA	NA	NA	CMS1	Right	NA	NA	NA	NA	GSE37892	CRC_AFFY
GSM929503	C3	60	<=65yr	Female	NA	NA	NA	Stage III	NA	1	6.66667	NA	NA	NA	NA	CMS4	Left	NA	NA	NA	NA	GSE37892	CRC_AFFY
GSM929504	C3	55	<=65yr	Male	NA	NA	NA	Stage III	NA	1	32.1667	NA	NA	NA	NA	CMS4	Right	NA	NA	NA	NA	GSE37892	CRC_AFFY
GSM929505	C2	74	>65yr	Female	NA	NA	NA	Stage II	NA	0	92.4333	NA	NA	NA	NA	CMS3	Right	NA	NA	NA	NA	GSE37892	CRC_AFFY
GSM929506	C1	72	>65yr	Male	NA	NA	NA	Stage II	NA	0	41.9667	NA	NA	NA	NA	CMS2	Left	NA	NA	NA	NA	GSE37892	CRC_AFFY
GSM929507	C2	66	>65yr	Female	NA	NA	NA	Stage II	NA	0	86.6667	NA	NA	NA	NA	CMS4	Left	NA	NA	NA	NA	GSE37892	CRC_AFFY
GSM929508	C3	64	<=65yr	Female	NA	NA	NA	Stage II	NA	1	14.6333	NA	NA	NA	NA	CMS4	Left	NA	NA	NA	NA	GSE37892	CRC_AFFY
GSM929509	C2	49	<=65yr	Female	NA	NA	NA	Stage II	NA	0	76.9333	NA	NA	NA	NA	CMS3	Left	NA	NA	NA	NA	GSE37892	CRC_AFFY
GSM929510	C4	76	>65yr	Male	NA	NA	NA	Stage II	NA	0	11.9333	NA	NA	NA	NA	CMS1	Left	NA	NA	NA	NA	GSE37892	CRC_AFFY
GSM929511	C4	66	>65yr	Male	NA	NA	NA	Stage III	NA	1	28.6	NA	NA	NA	NA	CMS1	Left	NA	NA	NA	NA	GSE37892	CRC_AFFY
GSM929512	C2	53	<=65yr	Male	NA	NA	NA	Stage III	NA	0	32.7333	NA	NA	NA	NA	CMS4	Left	NA	NA	NA	NA	GSE37892	CRC_AFFY
GSM929513	C3	72	>65yr	Female	NA	NA	NA	Stage III	NA	0	41.9667	NA	NA	NA	NA	CMS4	Right	NA	NA	NA	NA	GSE37892	CRC_AFFY
GSM929514	C1	53	<=65yr	Male	NA	NA	NA	Stage II	NA	0	72.2667	NA	NA	NA	NA	CMS2	Right	NA	NA	NA	NA	GSE37892	CRC_AFFY
GSM929515	C1	61	<=65yr	Male	NA	NA	NA	Stage II	NA	0	64.7	NA	NA	NA	NA	CMS2	Left	NA	NA	NA	NA	GSE37892	CRC_AFFY
GSM929516	C1	76	>65yr	Male	NA	NA	NA	Stage II	NA	0	56.5	NA	NA	NA	NA	CMS2	Left	NA	NA	NA	NA	GSE37892	CRC_AFFY
GSM929517	C4	71	>65yr	Female	NA	NA	NA	Stage II	NA	0	46.6333	NA	NA	NA	NA	CMS3	Left	NA	NA	NA	NA	GSE37892	CRC_AFFY
GSM929518	C2	66	>65yr	Male	NA	NA	NA	Stage III	NA	0	15.3667	NA	NA	NA	NA	CMS3	Left	NA	NA	NA	NA	GSE37892	CRC_AFFY
GSM929519	C1	96	>65yr	Male	NA	NA	NA	Stage III	NA	1	25.9667	NA	NA	NA	NA	CMS2	Left	NA	NA	NA	NA	GSE37892	CRC_AFFY
GSM929520	C4	96	>65yr	Male	NA	NA	NA	Stage III	NA	0	36.9	NA	NA	NA	NA	CMS1	Right	NA	NA	NA	NA	GSE37892	CRC_AFFY
GSM929521	C4	96	>65yr	Female	NA	NA	NA	Stage III	NA	0	36.6667	NA	NA	NA	NA	CMS1	Right	NA	NA	NA	NA	GSE37892	CRC_AFFY
GSM929522	C2	96	>65yr	Male	NA	NA	NA	Stage III	NA	0	36.1	NA	NA	NA	NA	CMS3	Left	NA	NA	NA	NA	GSE37892	CRC_AFFY
GSM929523	C1	96	>65yr	Female	NA	NA	NA	Stage III	NA	1	10.0333	NA	NA	NA	NA	CMS4	Left	NA	NA	NA	NA	GSE37892	CRC_AFFY
GSM929524	C1	97	>65yr	Female	NA	NA	NA	Stage III	NA	1	19.7	NA	NA	NA	NA	UNKNOWN	Right	NA	NA	NA	NA	GSE37892	CRC_AFFY
GSM929525	C1	63	<=65yr	Female	NA	NA	NA	Stage III	NA	1	3.7	NA	NA	NA	NA	UNKNOWN	Left	NA	NA	NA	NA	GSE37892	CRC_AFFY
GSM929526	C1	78	>65yr	Male	NA	NA	NA	Stage III	NA	0	15.3	NA	NA	NA	NA	CMS2	Left	NA	NA	NA	NA	GSE37892	CRC_AFFY
GSM929527	C1	71	>65yr	Female	NA	NA	NA	Stage III	NA	0	25.8333	NA	NA	NA	NA	CMS1	Right	NA	NA	NA	NA	GSE37892	CRC_AFFY
GSM929528	C4	73	>65yr	Female	NA	NA	NA	Stage II	NA	0	54.0333	NA	NA	NA	NA	CMS2	Left	NA	NA	NA	NA	GSE37892	CRC_AFFY
GSM929529	C1	59	<=65yr	Female	NA	NA	NA	Stage II	NA	0	36.5333	NA	NA	NA	NA	CMS2	Left	NA	NA	NA	NA	GSE37892	CRC_AFFY
GSM929530	C2	88	>65yr	Female	NA	NA	NA	Stage II	NA	0	41.3333	NA	NA	NA	NA	CMS3	Left	NA	NA	NA	NA	GSE37892	CRC_AFFY
GSM929531	C2	60	<=65yr	Male	NA	NA	NA	Stage II	NA	0	45.1667	NA	NA	NA	NA	CMS3	Right	NA	NA	NA	NA	GSE37892	CRC_AFFY
GSM929532	C4	61	<=65yr	Male	NA	NA	NA	Stage II	NA	0	44.9333	NA	NA	NA	NA	CMS3	Right	NA	NA	NA	NA	GSE37892	CRC_AFFY
GSM929533	C1	79	>65yr	Male	NA	NA	NA	Stage II	NA	0	45.6333	NA	NA	NA	NA	CMS2	Left	NA	NA	NA	NA	GSE37892	CRC_AFFY
GSM929534	C4	53	<=65yr	Female	NA	NA	NA	Stage II	NA	0	46.3333	NA	NA	NA	NA	CMS2	Left	NA	NA	NA	NA	GSE37892	CRC_AFFY
GSM929535	C1	49	<=65yr	Male	NA	NA	NA	Stage II	NA	0	44.2	NA	NA	NA	NA	CMS2	Left	NA	NA	NA	NA	GSE37892	CRC_AFFY
GSM929536	C4	71	>65yr	Female	NA	NA	NA	Stage II	NA	0	57.8667	NA	NA	NA	NA	UNKNOWN	Right	NA	NA	NA	NA	GSE37892	CRC_AFFY
GSM929537	C1	75	>65yr	Male	NA	NA	NA	Stage II	NA	0	44.9667	NA	NA	NA	NA	CMS2	Left	NA	NA	NA	NA	GSE37892	CRC_AFFY
GSM929538	C4	86	>65yr	Male	NA	NA	NA	Stage II	NA	0	42.8333	NA	NA	NA	NA	UNKNOWN	Right	NA	NA	NA	NA	GSE37892	CRC_AFFY
GSM929539	C2	56	<=65yr	Female	NA	NA	NA	Stage II	NA	1	12.7667	NA	NA	NA	NA	CMS4	Right	NA	NA	NA	NA	GSE37892	CRC_AFFY
GSM929540	C1	81	>65yr	Male	NA	NA	NA	Stage II	NA	0	64.9333	NA	NA	NA	NA	CMS2	Left	NA	NA	NA	NA	GSE37892	CRC_AFFY
GSM929541	C3	78	>65yr	Male	NA	NA	NA	Stage II	NA	0	56.6667	NA	NA	NA	NA	CMS2	Left	NA	NA	NA	NA	GSE37892	CRC_AFFY
GSM929542	C4	83	>65yr	Male	NA	NA	NA	Stage II	NA	0	51.7667	NA	NA	NA	NA	CMS3	Right	NA	NA	NA	NA	GSE37892	CRC_AFFY
GSM929543	C1	58	<=65yr	Male	NA	NA	NA	Stage II	NA	0	42.7333	NA	NA	NA	NA	CMS3	Right	NA	NA	NA	NA	GSE37892	CRC_AFFY
GSM929544	C1	93	>65yr	Female	NA	NA	NA	Stage II	NA	0	33.5333	NA	NA	NA	NA	CMS4	Right	NA	NA	NA	NA	GSE37892	CRC_AFFY
GSM929545	C1	81	>65yr	Male	NA	NA	NA	Stage II	NA	0	44.1	NA	NA	NA	NA	UNKNOWN	Left	NA	NA	NA	NA	GSE37892	CRC_AFFY
GSM929546	C4	84	>65yr	Female	NA	NA	NA	Stage II	NA	1	8.76667	NA	NA	NA	NA	CMS2	Right	NA	NA	NA	NA	GSE37892	CRC_AFFY
GSM929547	C1	78	>65yr	Male	NA	NA	NA	Stage II	NA	0	48.5333	NA	NA	NA	NA	CMS2	Right	NA	NA	NA	NA	GSE37892	CRC_AFFY
GSM929548	C2	73	>65yr	Female	NA	NA	NA	Stage II	NA	0	80.9667	NA	NA	NA	NA	CMS4	Left	NA	NA	NA	NA	GSE37892	CRC_AFFY
GSM929549	C3	68	>65yr	Female	NA	NA	NA	Stage II	NA	0	88.4667	NA	NA	NA	NA	CMS4	Right	NA	NA	NA	NA	GSE37892	CRC_AFFY
GSM929550	C1	72	>65yr	Female	NA	NA	NA	Stage II	NA	0	70.8	NA	NA	NA	NA	UNKNOWN	Left	NA	NA	NA	NA	GSE37892	CRC_AFFY
GSM929551	C1	67	>65yr	Male	NA	NA	NA	Stage II	NA	1	46.2333	NA	NA	NA	NA	CMS3	Left	NA	NA	NA	NA	GSE37892	CRC_AFFY
GSM929552	C3	76	>65yr	Female	NA	NA	NA	Stage II	NA	0	48.1333	NA	NA	NA	NA	CMS4	Left	NA	NA	NA	NA	GSE37892	CRC_AFFY
GSM929553	C3	55	<=65yr	Female	NA	NA	NA	Stage II	NA	0	75.8	NA	NA	NA	NA	CMS4	Left	NA	NA	NA	NA	GSE37892	CRC_AFFY
GSM929554	C3	67	>65yr	Female	NA	NA	NA	Stage II	NA	0	62.6	NA	NA	NA	NA	CMS4	Right	NA	NA	NA	NA	GSE37892	CRC_AFFY
GSM929555	C3	50	<=65yr	Male	NA	NA	NA	Stage II	NA	0	68.6333	NA	NA	NA	NA	CMS4	Left	NA	NA	NA	NA	GSE37892	CRC_AFFY
GSM929556	C1	68	>65yr	Male	NA	NA	NA	Stage II	NA	0	15.6333	NA	NA	NA	NA	UNKNOWN	Left	NA	NA	NA	NA	GSE37892	CRC_AFFY
GSM929557	C1	55	<=65yr	Male	NA	NA	NA	Stage II	NA	0	29.9667	NA	NA	NA	NA	UNKNOWN	Right	NA	NA	NA	NA	GSE37892	CRC_AFFY
GSM929558	C1	70	>65yr	Female	NA	NA	NA	Stage II	NA	0	59.6	NA	NA	NA	NA	UNKNOWN	Left	NA	NA	NA	NA	GSE37892	CRC_AFFY
GSM929559	C2	69	>65yr	Male	NA	NA	NA	Stage II	NA	0	0.566667	NA	NA	NA	NA	CMS4	Right	NA	NA	NA	NA	GSE37892	CRC_AFFY
GSM929560	C1	78	>65yr	Male	NA	NA	NA	Stage II	NA	0	34.4	NA	NA	NA	NA	CMS1	Right	NA	NA	NA	NA	GSE37892	CRC_AFFY
GSM929561	C1	61	<=65yr	Male	NA	NA	NA	Stage II	NA	0	1.3	NA	NA	NA	NA	CMS2	Left	NA	NA	NA	NA	GSE37892	CRC_AFFY
GSM929562	C3	82	>65yr	Male	NA	NA	NA	Stage II	NA	0	26.8	NA	NA	NA	NA	CMS4	Right	NA	NA	NA	NA	GSE37892	CRC_AFFY
GSM929563	C1	79	>65yr	Male	NA	NA	NA	Stage II	NA	0	27.2	NA	NA	NA	NA	CMS3	Right	NA	NA	NA	NA	GSE37892	CRC_AFFY
GSM929564	C2	75	>65yr	Female	NA	NA	NA	Stage II	NA	0	19.6667	NA	NA	NA	NA	CMS3	Left	NA	NA	NA	NA	GSE37892	CRC_AFFY
GSM929565	C3	81	>65yr	Male	NA	NA	NA	Stage II	NA	0	56.4333	NA	NA	NA	NA	CMS2	Left	NA	NA	NA	NA	GSE37892	CRC_AFFY
GSM929566	C3	64	<=65yr	Female	NA	NA	NA	Stage II	NA	0	61.1333	NA	NA	NA	NA	CMS2	Right	NA	NA	NA	NA	GSE37892	CRC_AFFY
GSM929567	C1	45	<=65yr	Female	NA	NA	NA	Stage II	NA	0	50.7333	NA	NA	NA	NA	CMS2	Left	NA	NA	NA	NA	GSE37892	CRC_AFFY
GSM929568	C1	77	>65yr	Male	NA	NA	NA	Stage II	NA	0	51.5	NA	NA	NA	NA	UNKNOWN	Right	NA	NA	NA	NA	GSE37892	CRC_AFFY
GSM929569	C1	55	<=65yr	Male	NA	NA	NA	Stage II	NA	0	70.0333	NA	NA	NA	NA	UNKNOWN	Left	NA	NA	NA	NA	GSE37892	CRC_AFFY
GSM929570	C1	94	>65yr	Female	NA	NA	NA	Stage II	NA	0	40.3333	NA	NA	NA	NA	UNKNOWN	Right	NA	NA	NA	NA	GSE37892	CRC_AFFY
GSM929571	C1	47	<=65yr	Female	NA	NA	NA	Stage II	NA	0	51.1333	NA	NA	NA	NA	CMS3	Right	NA	NA	NA	NA	GSE37892	CRC_AFFY
GSM929572	C3	64	<=65yr	Male	NA	NA	NA	Stage III	NA	1	12.2	NA	NA	NA	NA	CMS4	Right	NA	NA	NA	NA	GSE37892	CRC_AFFY
GSM929573	C2	22	<=65yr	Male	NA	NA	NA	Stage III	NA	0	47.6667	NA	NA	NA	NA	CMS4	Left	NA	NA	NA	NA	GSE37892	CRC_AFFY
GSM929574	C2	56	<=65yr	Male	NA	NA	NA	Stage III	NA	1	21.5	NA	NA	NA	NA	CMS3	Left	NA	NA	NA	NA	GSE37892	CRC_AFFY
GSM929575	C3	63	<=65yr	Female	NA	NA	NA	Stage III	NA	1	18.3333	NA	NA	NA	NA	CMS4	Right	NA	NA	NA	NA	GSE37892	CRC_AFFY
GSM929576	C4	76	>65yr	Male	NA	NA	NA	Stage III	NA	1	4.56667	NA	NA	NA	NA	CMS1	Right	NA	NA	NA	NA	GSE37892	CRC_AFFY
GSM929577	C2	63	<=65yr	Male	NA	NA	NA	Stage III	NA	1	14.2	NA	NA	NA	NA	CMS3	Left	NA	NA	NA	NA	GSE37892	CRC_AFFY
GSM929578	C2	64	<=65yr	Female	NA	NA	NA	Stage III	NA	0	33.3	NA	NA	NA	NA	CMS4	Right	NA	NA	NA	NA	GSE37892	CRC_AFFY
GSM929579	C1	67	>65yr	Female	NA	NA	NA	Stage II	NA	0	56.1667	NA	NA	NA	NA	CMS2	NA	NA	NA	NA	NA	GSE37892	CRC_AFFY
GSM929580	C4	77	>65yr	Male	NA	NA	NA	Stage II	NA	0	55.4333	NA	NA	NA	NA	CMS3	Right	NA	NA	NA	NA	GSE37892	CRC_AFFY
GSM929581	C1	75	>65yr	Female	NA	NA	NA	Stage II	NA	0	56	NA	NA	NA	NA	CMS2	Right	NA	NA	NA	NA	GSE37892	CRC_AFFY
GSM929582	C2	70	>65yr	Male	NA	NA	NA	Stage II	NA	0	64.6333	NA	NA	NA	NA	CMS4	Left	NA	NA	NA	NA	GSE37892	CRC_AFFY
GSM929583	C1	77	>65yr	Female	NA	NA	NA	Stage II	NA	0	59.0333	NA	NA	NA	NA	UNKNOWN	Right	NA	NA	NA	NA	GSE37892	CRC_AFFY
GSM929584	C1	70	>65yr	Female	NA	NA	NA	Stage II	NA	0	59.3	NA	NA	NA	NA	CMS2	Left	NA	NA	NA	NA	GSE37892	CRC_AFFY
GSM929585	C3	63	<=65yr	Male	NA	NA	NA	Stage II	NA	1	28.0333	NA	NA	NA	NA	CMS2	Right	NA	NA	NA	NA	GSE37892	CRC_AFFY
GSM929586	C1	62	<=65yr	Male	NA	NA	NA	Stage II	NA	1	25.0333	NA	NA	NA	NA	CMS2	Left	NA	NA	NA	NA	GSE37892	CRC_AFFY
GSM929587	C1	58	<=65yr	Male	NA	NA	NA	Stage II	NA	1	38.3333	NA	NA	NA	NA	CMS2	Right	NA	NA	NA	NA	GSE37892	CRC_AFFY
GSM929588	C3	61	<=65yr	Male	NA	NA	NA	Stage II	NA	0	71.8333	NA	NA	NA	NA	CMS4	Right	NA	NA	NA	NA	GSE37892	CRC_AFFY
GSM929589	C1	71	>65yr	Female	NA	NA	NA	Stage III	NA	0	63.4667	NA	NA	NA	NA	CMS3	Right	NA	NA	NA	NA	GSE37892	CRC_AFFY
GSM929590	C3	58	<=65yr	Male	NA	NA	NA	Stage III	NA	1	18.3667	NA	NA	NA	NA	CMS4	Left	NA	NA	NA	NA	GSE37892	CRC_AFFY
GSM929591	C3	72	>65yr	Male	NA	NA	NA	Stage II	NA	1	17.3	NA	NA	NA	NA	CMS4	Right	NA	NA	NA	NA	GSE37892	CRC_AFFY
GSM929592	C2	59	<=65yr	Female	NA	NA	NA	Stage III	NA	0	47.7333	NA	NA	NA	NA	CMS4	Right	NA	NA	NA	NA	GSE37892	CRC_AFFY
GSM929593	C2	50	<=65yr	Male	NA	NA	NA	Stage III	NA	1	14.6	NA	NA	NA	NA	CMS4	Right	NA	NA	NA	NA	GSE37892	CRC_AFFY
GSM929594	C2	72	>65yr	Male	NA	NA	NA	Stage III	NA	0	60.6667	NA	NA	NA	NA	CMS4	Left	NA	NA	NA	NA	GSE37892	CRC_AFFY
GSM929595	C1	50	<=65yr	Male	NA	NA	NA	Stage III	NA	0	60.1333	NA	NA	NA	NA	CMS2	Right	NA	NA	NA	NA	GSE37892	CRC_AFFY
GSM929596	C4	64	<=65yr	Male	NA	NA	NA	Stage III	NA	0	104.567	NA	NA	NA	NA	CMS2	Left	NA	NA	NA	NA	GSE37892	CRC_AFFY
GSM929597	C2	63	<=65yr	Female	NA	NA	NA	Stage III	NA	0	59.5667	NA	NA	NA	NA	CMS3	Left	NA	NA	NA	NA	GSE37892	CRC_AFFY
GSM929598	C4	65	<=65yr	Male	NA	NA	NA	Stage III	NA	0	55.6	NA	NA	NA	NA	CMS2	Left	NA	NA	NA	NA	GSE37892	CRC_AFFY
GSM929599	C4	59	<=65yr	Male	NA	NA	NA	Stage III	NA	1	33.8333	NA	NA	NA	NA	CMS2	Right	NA	NA	NA	NA	GSE37892	CRC_AFFY
GSM929600	C3	46	<=65yr	Female	NA	NA	NA	Stage III	NA	0	72.1	NA	NA	NA	NA	CMS4	Right	NA	NA	NA	NA	GSE37892	CRC_AFFY
GSM929601	C2	76	>65yr	Male	NA	NA	NA	Stage III	NA	0	61.7667	NA	NA	NA	NA	CMS1	Left	NA	NA	NA	NA	GSE37892	CRC_AFFY
GSM929602	C1	84	>65yr	Female	NA	NA	NA	Stage II	NA	0	36.5333	NA	NA	NA	NA	UNKNOWN	Right	NA	NA	NA	NA	GSE37892	CRC_AFFY
GSM929603	C3	78	>65yr	Male	NA	NA	NA	Stage III	NA	0	49.8667	NA	NA	NA	NA	CMS4	Right	NA	NA	NA	NA	GSE37892	CRC_AFFY
GSM929604	C4	54	<=65yr	Female	NA	NA	NA	Stage III	NA	0	93.9333	NA	NA	NA	NA	CMS1	Left	NA	NA	NA	NA	GSE37892	CRC_AFFY
GSM929605	C1	73	>65yr	Male	NA	NA	NA	Stage III	NA	0	46.9	NA	NA	NA	NA	CMS3	Right	NA	NA	NA	NA	GSE37892	CRC_AFFY
GSM929606	C2	59	<=65yr	Female	NA	NA	NA	Stage III	NA	0	36.6333	NA	NA	NA	NA	CMS4	Left	NA	NA	NA	NA	GSE37892	CRC_AFFY
GSM929607	C4	68	>65yr	Female	NA	NA	NA	Stage III	NA	0	95.4667	NA	NA	NA	NA	CMS1	Left	NA	NA	NA	NA	GSE37892	CRC_AFFY
GSM929608	C1	47	<=65yr	Male	NA	NA	NA	Stage III	NA	0	38.3	NA	NA	NA	NA	CMS2	Right	NA	NA	NA	NA	GSE37892	CRC_AFFY
GSM929609	C3	64	<=65yr	Female	NA	NA	NA	Stage III	NA	1	6.8	NA	NA	NA	NA	CMS4	Right	NA	NA	NA	NA	GSE37892	CRC_AFFY
GSM929610	C1	66	>65yr	Male	NA	NA	NA	Stage III	NA	1	38.5333	NA	NA	NA	NA	CMS2	Right	NA	NA	NA	NA	GSE37892	CRC_AFFY
GSM929611	C3	73	>65yr	Female	NA	NA	NA	Stage III	NA	0	44.2333	NA	NA	NA	NA	CMS4	Left	NA	NA	NA	NA	GSE37892	CRC_AFFY
GSM929612	C4	73	>65yr	Female	NA	NA	NA	Stage III	NA	1	33.1	NA	NA	NA	NA	CMS2	Left	NA	NA	NA	NA	GSE37892	CRC_AFFY
GSM929613	C1	71	>65yr	Female	NA	NA	NA	Stage II	NA	0	47.2	NA	NA	NA	NA	CMS2	Left	NA	NA	NA	NA	GSE37892	CRC_AFFY
GSM929614	C4	72	>65yr	Female	NA	NA	NA	Stage III	NA	1	18.7	NA	NA	NA	NA	CMS4	Left	NA	NA	NA	NA	GSE37892	CRC_AFFY
GSM929615	C4	70	>65yr	Female	NA	NA	NA	Stage III	NA	0	71.1667	NA	NA	NA	NA	CMS2	Left	NA	NA	NA	NA	GSE37892	CRC_AFFY
GSM929616	C2	78	>65yr	Female	NA	NA	NA	Stage II	NA	0	5.33333	NA	NA	NA	NA	CMS4	Left	NA	NA	NA	NA	GSE37892	CRC_AFFY
GSM929617	C2	78	>65yr	Female	NA	NA	NA	Stage III	NA	1	11.2333	NA	NA	NA	NA	CMS1	Right	NA	NA	NA	NA	GSE37892	CRC_AFFY
GSM929618	C1	64	<=65yr	Male	NA	NA	NA	Stage III	NA	1	20.2667	NA	NA	NA	NA	CMS1	Left	NA	NA	NA	NA	GSE37892	CRC_AFFY
GSM929619	C3	87	>65yr	Female	NA	NA	NA	Stage II	NA	0	62.9	NA	NA	NA	NA	CMS4	Left	NA	NA	NA	NA	GSE37892	CRC_AFFY
GSM929620	C3	78	>65yr	Female	NA	NA	NA	Stage II	NA	0	87.4667	NA	NA	NA	NA	CMS4	Right	NA	NA	NA	NA	GSE37892	CRC_AFFY
GSM929621	C3	64	<=65yr	Male	NA	NA	NA	Stage II	NA	0	95.3333	NA	NA	NA	NA	CMS4	Left	NA	NA	NA	NA	GSE37892	CRC_AFFY
GSM929622	C2	79	>65yr	Female	NA	NA	NA	Stage III	NA	1	2.6	NA	NA	NA	NA	CMS4	Left	NA	NA	NA	NA	GSE37892	CRC_AFFY
GSM929623	C3	59	<=65yr	Female	NA	NA	NA	Stage III	NA	1	11.6667	NA	NA	NA	NA	CMS3	Left	NA	NA	NA	NA	GSE37892	CRC_AFFY
GSM950411	C2	NA	NA	NA	NA	NA	NA	Stage IV	NA	NA	NA	NA	NA	NA	NA	CMS1	NA	NA	NA	NA	NA	GSE38832	CRC_AFFY
GSM950412	C3	NA	NA	NA	NA	NA	NA	Stage IV	NA	NA	NA	NA	NA	NA	NA	CMS4	NA	NA	NA	NA	NA	GSE38832	CRC_AFFY
GSM950413	C2	NA	NA	NA	NA	NA	NA	Stage IV	NA	NA	NA	NA	NA	NA	NA	CMS1	NA	NA	NA	NA	NA	GSE38832	CRC_AFFY
GSM950414	C2	NA	NA	NA	NA	NA	NA	Stage IV	NA	NA	NA	NA	NA	NA	NA	CMS3	NA	NA	NA	NA	NA	GSE38832	CRC_AFFY
GSM950415	C4	NA	NA	NA	NA	NA	NA	Stage IV	NA	NA	NA	NA	NA	NA	NA	CMS3	NA	NA	NA	NA	NA	GSE38832	CRC_AFFY
GSM950416	C2	NA	NA	NA	NA	NA	NA	Stage IV	NA	NA	NA	NA	NA	NA	NA	CMS3	NA	NA	NA	NA	NA	GSE38832	CRC_AFFY
GSM950417	C2	NA	NA	NA	NA	NA	NA	Stage II	NA	0	0.43	NA	NA	NA	NA	CMS2	NA	NA	NA	NA	NA	GSE38832	CRC_AFFY
GSM950418	C2	NA	NA	NA	NA	NA	NA	Stage II	NA	0	84.43	NA	NA	NA	NA	CMS3	NA	NA	NA	NA	NA	GSE38832	CRC_AFFY
GSM950419	C1	NA	NA	NA	NA	NA	NA	Stage III	NA	0	43.83	NA	NA	NA	NA	CMS3	NA	NA	NA	NA	NA	GSE38832	CRC_AFFY
GSM950420	C4	NA	NA	NA	NA	NA	NA	Stage II	NA	0	81.1	NA	NA	NA	NA	CMS1	NA	NA	NA	NA	NA	GSE38832	CRC_AFFY
GSM950421	C4	NA	NA	NA	NA	NA	NA	Stage III	NA	1	3.87	NA	NA	NA	NA	CMS1	NA	NA	NA	NA	NA	GSE38832	CRC_AFFY
GSM950422	C2	NA	NA	NA	NA	NA	NA	Stage III	NA	0	108.57	NA	NA	NA	NA	CMS4	NA	NA	NA	NA	NA	GSE38832	CRC_AFFY
GSM950423	C3	NA	NA	NA	NA	NA	NA	Stage II	NA	0	27.6	NA	NA	NA	NA	CMS2	NA	NA	NA	NA	NA	GSE38832	CRC_AFFY
GSM950424	C3	NA	NA	NA	NA	NA	NA	Stage III	NA	0	41.47	NA	NA	NA	NA	CMS4	NA	NA	NA	NA	NA	GSE38832	CRC_AFFY
GSM950425	C2	NA	NA	NA	NA	NA	NA	Stage III	NA	0	41	NA	NA	NA	NA	CMS4	NA	NA	NA	NA	NA	GSE38832	CRC_AFFY
GSM950426	C1	NA	NA	NA	NA	NA	NA	Stage III	NA	0	54	NA	NA	NA	NA	CMS2	NA	NA	NA	NA	NA	GSE38832	CRC_AFFY
GSM950427	C1	NA	NA	NA	NA	NA	NA	Stage IV	NA	NA	NA	NA	NA	NA	NA	UNKNOWN	NA	NA	NA	NA	NA	GSE38832	CRC_AFFY
GSM950428	C3	NA	NA	NA	NA	NA	NA	Stage I	NA	0	3.57	NA	NA	NA	NA	CMS2	NA	NA	NA	NA	NA	GSE38832	CRC_AFFY
GSM950429	C4	NA	NA	NA	NA	NA	NA	Stage III	NA	0	108.73	NA	NA	NA	NA	CMS1	NA	NA	NA	NA	NA	GSE38832	CRC_AFFY
GSM950430	C2	NA	NA	NA	NA	NA	NA	Stage II	NA	0	46.2	NA	NA	NA	NA	CMS4	NA	NA	NA	NA	NA	GSE38832	CRC_AFFY
GSM950431	C1	NA	NA	NA	NA	NA	NA	Stage III	NA	0	70.6	NA	NA	NA	NA	CMS3	NA	NA	NA	NA	NA	GSE38832	CRC_AFFY
GSM950432	C1	NA	NA	NA	NA	NA	NA	Stage III	NA	0	105.6	NA	NA	NA	NA	CMS3	NA	NA	NA	NA	NA	GSE38832	CRC_AFFY
GSM950433	C2	NA	NA	NA	NA	NA	NA	Stage III	NA	1	60	NA	NA	NA	NA	CMS4	NA	NA	NA	NA	NA	GSE38832	CRC_AFFY
GSM950434	C1	NA	NA	NA	NA	NA	NA	Stage III	NA	0	85.63	NA	NA	NA	NA	CMS2	NA	NA	NA	NA	NA	GSE38832	CRC_AFFY
GSM950435	C2	NA	NA	NA	NA	NA	NA	Stage II	NA	0	95.03	NA	NA	NA	NA	CMS4	NA	NA	NA	NA	NA	GSE38832	CRC_AFFY
GSM950436	C3	NA	NA	NA	NA	NA	NA	Stage III	NA	0	54.7	NA	NA	NA	NA	CMS4	NA	NA	NA	NA	NA	GSE38832	CRC_AFFY
GSM950437	C1	NA	NA	NA	NA	NA	NA	Stage II	NA	0	92.37	NA	NA	NA	NA	CMS2	NA	NA	NA	NA	NA	GSE38832	CRC_AFFY
GSM950438	C1	NA	NA	NA	NA	NA	NA	Stage III	NA	1	41.53	NA	NA	NA	NA	CMS3	NA	NA	NA	NA	NA	GSE38832	CRC_AFFY
GSM950439	C1	NA	NA	NA	NA	NA	NA	Stage III	NA	0	57.2	NA	NA	NA	NA	UNKNOWN	NA	NA	NA	NA	NA	GSE38832	CRC_AFFY
GSM950440	C4	NA	NA	NA	NA	NA	NA	Stage I	NA	0	101.3	NA	NA	NA	NA	UNKNOWN	NA	NA	NA	NA	NA	GSE38832	CRC_AFFY
GSM950441	C2	NA	NA	NA	NA	NA	NA	Stage I	NA	0	97.53	NA	NA	NA	NA	CMS3	NA	NA	NA	NA	NA	GSE38832	CRC_AFFY
GSM950442	C3	NA	NA	NA	NA	NA	NA	Stage I	NA	0	107.1	NA	NA	NA	NA	CMS4	NA	NA	NA	NA	NA	GSE38832	CRC_AFFY
GSM950443	C2	NA	NA	NA	NA	NA	NA	Stage I	NA	0	54.47	NA	NA	NA	NA	CMS2	NA	NA	NA	NA	NA	GSE38832	CRC_AFFY
GSM950444	C2	NA	NA	NA	NA	NA	NA	Stage II	NA	0	83.77	NA	NA	NA	NA	CMS4	NA	NA	NA	NA	NA	GSE38832	CRC_AFFY
GSM950445	C3	NA	NA	NA	NA	NA	NA	Stage I	NA	0	35	NA	NA	NA	NA	CMS2	NA	NA	NA	NA	NA	GSE38832	CRC_AFFY
GSM950446	C3	NA	NA	NA	NA	NA	NA	Stage III	NA	0	30.93	NA	NA	NA	NA	CMS4	NA	NA	NA	NA	NA	GSE38832	CRC_AFFY
GSM950447	C4	NA	NA	NA	NA	NA	NA	Stage I	NA	0	14.63	NA	NA	NA	NA	CMS1	NA	NA	NA	NA	NA	GSE38832	CRC_AFFY
GSM950448	C1	NA	NA	NA	NA	NA	NA	Stage II	NA	0	12.17	NA	NA	NA	NA	CMS2	NA	NA	NA	NA	NA	GSE38832	CRC_AFFY
GSM950449	C4	NA	NA	NA	NA	NA	NA	Stage III	NA	0	0.3	NA	NA	NA	NA	CMS1	NA	NA	NA	NA	NA	GSE38832	CRC_AFFY
GSM950450	C4	NA	NA	NA	NA	NA	NA	Stage III	NA	0	30.33	NA	NA	NA	NA	CMS2	NA	NA	NA	NA	NA	GSE38832	CRC_AFFY
GSM950451	C3	NA	NA	NA	NA	NA	NA	Stage IV	NA	NA	NA	NA	NA	NA	NA	CMS1	NA	NA	NA	NA	NA	GSE38832	CRC_AFFY
GSM950452	C3	NA	NA	NA	NA	NA	NA	Stage III	NA	1	18.07	NA	NA	NA	NA	CMS1	NA	NA	NA	NA	NA	GSE38832	CRC_AFFY
GSM950453	C4	NA	NA	NA	NA	NA	NA	Stage II	NA	0	31.37	NA	NA	NA	NA	CMS2	NA	NA	NA	NA	NA	GSE38832	CRC_AFFY
GSM950454	C4	NA	NA	NA	NA	NA	NA	Stage II	NA	0	11.43	NA	NA	NA	NA	CMS2	NA	NA	NA	NA	NA	GSE38832	CRC_AFFY
GSM950455	C4	NA	NA	NA	NA	NA	NA	Stage III	NA	0	22.83	NA	NA	NA	NA	CMS1	NA	NA	NA	NA	NA	GSE38832	CRC_AFFY
GSM950456	C1	NA	NA	NA	NA	NA	NA	Stage IV	NA	NA	NA	NA	NA	NA	NA	UNKNOWN	NA	NA	NA	NA	NA	GSE38832	CRC_AFFY
GSM950457	C3	NA	NA	NA	NA	NA	NA	Stage III	NA	1	9.73	NA	NA	NA	NA	CMS4	NA	NA	NA	NA	NA	GSE38832	CRC_AFFY
GSM950458	C2	NA	NA	NA	NA	NA	NA	Stage IV	NA	NA	NA	NA	NA	NA	NA	CMS3	NA	NA	NA	NA	NA	GSE38832	CRC_AFFY
GSM950459	C3	NA	NA	NA	NA	NA	NA	Stage III	NA	0	20.77	NA	NA	NA	NA	CMS4	NA	NA	NA	NA	NA	GSE38832	CRC_AFFY
GSM950460	C1	NA	NA	NA	NA	NA	NA	Stage II	NA	0	63.53	NA	NA	NA	NA	CMS2	NA	NA	NA	NA	NA	GSE38832	CRC_AFFY
GSM950461	C3	NA	NA	NA	NA	NA	NA	Stage II	NA	0	37.17	NA	NA	NA	NA	CMS4	NA	NA	NA	NA	NA	GSE38832	CRC_AFFY
GSM950462	C2	NA	NA	NA	NA	NA	NA	Stage II	NA	0	40.47	NA	NA	NA	NA	CMS2	NA	NA	NA	NA	NA	GSE38832	CRC_AFFY
GSM950463	C1	NA	NA	NA	NA	NA	NA	Stage III	NA	0	7.37	NA	NA	NA	NA	CMS2	NA	NA	NA	NA	NA	GSE38832	CRC_AFFY
GSM950464	C4	NA	NA	NA	NA	NA	NA	Stage IV	NA	NA	NA	NA	NA	NA	NA	CMS1	NA	NA	NA	NA	NA	GSE38832	CRC_AFFY
GSM950465	C2	NA	NA	NA	NA	NA	NA	Stage II	NA	0	24.83	NA	NA	NA	NA	CMS4	NA	NA	NA	NA	NA	GSE38832	CRC_AFFY
GSM950466	C3	NA	NA	NA	NA	NA	NA	Stage IV	NA	NA	NA	NA	NA	NA	NA	CMS4	NA	NA	NA	NA	NA	GSE38832	CRC_AFFY
GSM950467	C4	NA	NA	NA	NA	NA	NA	Stage I	NA	0	37	NA	NA	NA	NA	CMS2	NA	NA	NA	NA	NA	GSE38832	CRC_AFFY
GSM950468	C4	NA	NA	NA	NA	NA	NA	Stage II	NA	0	3.83	NA	NA	NA	NA	CMS1	NA	NA	NA	NA	NA	GSE38832	CRC_AFFY
GSM950469	C4	NA	NA	NA	NA	NA	NA	Stage I	NA	0	13.87	NA	NA	NA	NA	CMS1	NA	NA	NA	NA	NA	GSE38832	CRC_AFFY
GSM950470	C3	NA	NA	NA	NA	NA	NA	Stage III	NA	0	25.1	NA	NA	NA	NA	CMS2	NA	NA	NA	NA	NA	GSE38832	CRC_AFFY
GSM950471	C1	NA	NA	NA	NA	NA	NA	Stage III	NA	0	110.5	NA	NA	NA	NA	CMS2	NA	NA	NA	NA	NA	GSE38832	CRC_AFFY
GSM950472	C4	NA	NA	NA	NA	NA	NA	Stage I	NA	0	31.33	NA	NA	NA	NA	UNKNOWN	NA	NA	NA	NA	NA	GSE38832	CRC_AFFY
GSM950473	C3	NA	NA	NA	NA	NA	NA	Stage IV	NA	NA	NA	NA	NA	NA	NA	CMS3	NA	NA	NA	NA	NA	GSE38832	CRC_AFFY
GSM950474	C1	NA	NA	NA	NA	NA	NA	Stage II	NA	0	42.87	NA	NA	NA	NA	CMS3	NA	NA	NA	NA	NA	GSE38832	CRC_AFFY
GSM950475	C4	NA	NA	NA	NA	NA	NA	Stage I	NA	0	55.1	NA	NA	NA	NA	CMS1	NA	NA	NA	NA	NA	GSE38832	CRC_AFFY
GSM950476	C4	NA	NA	NA	NA	NA	NA	Stage I	NA	0	59.03	NA	NA	NA	NA	CMS1	NA	NA	NA	NA	NA	GSE38832	CRC_AFFY
GSM950477	C3	NA	NA	NA	NA	NA	NA	Stage I	NA	0	21.63	NA	NA	NA	NA	CMS2	NA	NA	NA	NA	NA	GSE38832	CRC_AFFY
GSM950478	C3	NA	NA	NA	NA	NA	NA	Stage III	NA	1	22.93	NA	NA	NA	NA	CMS4	NA	NA	NA	NA	NA	GSE38832	CRC_AFFY
GSM950479	C1	NA	NA	NA	NA	NA	NA	Stage II	NA	0	20.83	NA	NA	NA	NA	CMS3	NA	NA	NA	NA	NA	GSE38832	CRC_AFFY
GSM950480	C1	NA	NA	NA	NA	NA	NA	Stage III	NA	0	12.97	NA	NA	NA	NA	CMS2	NA	NA	NA	NA	NA	GSE38832	CRC_AFFY
GSM950481	C4	NA	NA	NA	NA	NA	NA	Stage II	NA	0	56.4	NA	NA	NA	NA	CMS1	NA	NA	NA	NA	NA	GSE38832	CRC_AFFY
GSM950482	C1	NA	NA	NA	NA	NA	NA	Stage IV	NA	NA	NA	NA	NA	NA	NA	CMS2	NA	NA	NA	NA	NA	GSE38832	CRC_AFFY
GSM950483	C4	NA	NA	NA	NA	NA	NA	Stage I	NA	0	30.8	NA	NA	NA	NA	CMS1	NA	NA	NA	NA	NA	GSE38832	CRC_AFFY
GSM950484	C4	NA	NA	NA	NA	NA	NA	Stage III	NA	0	20.43	NA	NA	NA	NA	CMS4	NA	NA	NA	NA	NA	GSE38832	CRC_AFFY
GSM950485	C1	NA	NA	NA	NA	NA	NA	Stage II	NA	0	19.77	NA	NA	NA	NA	CMS2	NA	NA	NA	NA	NA	GSE38832	CRC_AFFY
GSM950486	C3	NA	NA	NA	NA	NA	NA	Stage III	NA	1	11.7	NA	NA	NA	NA	CMS2	NA	NA	NA	NA	NA	GSE38832	CRC_AFFY
GSM950487	C3	NA	NA	NA	NA	NA	NA	Stage II	NA	1	14.6	NA	NA	NA	NA	CMS4	NA	NA	NA	NA	NA	GSE38832	CRC_AFFY
GSM950488	C1	NA	NA	NA	NA	NA	NA	Stage IV	NA	NA	NA	NA	NA	NA	NA	CMS4	NA	NA	NA	NA	NA	GSE38832	CRC_AFFY
GSM950489	C3	NA	NA	NA	NA	NA	NA	Stage I	NA	0	40.07	NA	NA	NA	NA	CMS3	NA	NA	NA	NA	NA	GSE38832	CRC_AFFY
GSM950490	C3	NA	NA	NA	NA	NA	NA	Stage II	NA	0	53.03	NA	NA	NA	NA	CMS3	NA	NA	NA	NA	NA	GSE38832	CRC_AFFY
GSM950491	C3	NA	NA	NA	NA	NA	NA	Stage IV	NA	NA	NA	NA	NA	NA	NA	CMS2	NA	NA	NA	NA	NA	GSE38832	CRC_AFFY
GSM950492	C2	NA	NA	NA	NA	NA	NA	Stage III	NA	0	44.7	NA	NA	NA	NA	CMS4	NA	NA	NA	NA	NA	GSE38832	CRC_AFFY
GSM950493	C3	NA	NA	NA	NA	NA	NA	Stage IV	NA	NA	NA	NA	NA	NA	NA	CMS2	NA	NA	NA	NA	NA	GSE38832	CRC_AFFY
GSM950494	C2	NA	NA	NA	NA	NA	NA	Stage IV	NA	NA	NA	NA	NA	NA	NA	CMS4	NA	NA	NA	NA	NA	GSE38832	CRC_AFFY
GSM950495	C3	NA	NA	NA	NA	NA	NA	Stage II	NA	0	9.2	NA	NA	NA	NA	CMS4	NA	NA	NA	NA	NA	GSE38832	CRC_AFFY
GSM950496	C4	NA	NA	NA	NA	NA	NA	Stage I	NA	0	24.33	NA	NA	NA	NA	CMS4	NA	NA	NA	NA	NA	GSE38832	CRC_AFFY
GSM950497	C3	NA	NA	NA	NA	NA	NA	Stage II	NA	0	4.33	NA	NA	NA	NA	CMS2	NA	NA	NA	NA	NA	GSE38832	CRC_AFFY
GSM950498	C1	NA	NA	NA	NA	NA	NA	Stage IV	NA	NA	NA	NA	NA	NA	NA	CMS2	NA	NA	NA	NA	NA	GSE38832	CRC_AFFY
GSM950499	C1	NA	NA	NA	NA	NA	NA	Stage I	NA	0	24.1	NA	NA	NA	NA	UNKNOWN	NA	NA	NA	NA	NA	GSE38832	CRC_AFFY
GSM950500	C4	NA	NA	NA	NA	NA	NA	Stage II	NA	0	20.33	NA	NA	NA	NA	CMS1	NA	NA	NA	NA	NA	GSE38832	CRC_AFFY
GSM950501	C3	NA	NA	NA	NA	NA	NA	Stage IV	NA	NA	NA	NA	NA	NA	NA	CMS4	NA	NA	NA	NA	NA	GSE38832	CRC_AFFY
GSM950502	C1	NA	NA	NA	NA	NA	NA	Stage IV	NA	NA	NA	NA	NA	NA	NA	CMS3	NA	NA	NA	NA	NA	GSE38832	CRC_AFFY
GSM950503	C2	NA	NA	NA	NA	NA	NA	Stage I	NA	0	49.5	NA	NA	NA	NA	CMS1	NA	NA	NA	NA	NA	GSE38832	CRC_AFFY
GSM950504	C1	NA	NA	NA	NA	NA	NA	Stage II	NA	1	10.53	NA	NA	NA	NA	CMS3	NA	NA	NA	NA	NA	GSE38832	CRC_AFFY
GSM950505	C1	NA	NA	NA	NA	NA	NA	Stage III	NA	0	11.43	NA	NA	NA	NA	CMS1	NA	NA	NA	NA	NA	GSE38832	CRC_AFFY
GSM950506	C1	NA	NA	NA	NA	NA	NA	Stage II	NA	0	8.43	NA	NA	NA	NA	CMS2	NA	NA	NA	NA	NA	GSE38832	CRC_AFFY
GSM950507	C3	NA	NA	NA	NA	NA	NA	Stage II	NA	0	9.6	NA	NA	NA	NA	CMS4	NA	NA	NA	NA	NA	GSE38832	CRC_AFFY
GSM950508	C1	NA	NA	NA	NA	NA	NA	Stage IV	NA	NA	NA	NA	NA	NA	NA	CMS2	NA	NA	NA	NA	NA	GSE38832	CRC_AFFY
GSM950509	C4	NA	NA	NA	NA	NA	NA	Stage III	NA	0	54.17	NA	NA	NA	NA	UNKNOWN	NA	NA	NA	NA	NA	GSE38832	CRC_AFFY
GSM950510	C3	NA	NA	NA	NA	NA	NA	Stage IV	NA	NA	NA	NA	NA	NA	NA	CMS4	NA	NA	NA	NA	NA	GSE38832	CRC_AFFY
GSM950511	C1	NA	NA	NA	NA	NA	NA	Stage IV	NA	NA	NA	NA	NA	NA	NA	CMS4	NA	NA	NA	NA	NA	GSE38832	CRC_AFFY
GSM950512	C1	NA	NA	NA	NA	NA	NA	Stage II	NA	0	80.37	NA	NA	NA	NA	CMS2	NA	NA	NA	NA	NA	GSE38832	CRC_AFFY
GSM950513	C1	NA	NA	NA	NA	NA	NA	Stage II	NA	0	95.03	NA	NA	NA	NA	CMS1	NA	NA	NA	NA	NA	GSE38832	CRC_AFFY
GSM950514	C1	NA	NA	NA	NA	NA	NA	Stage III	NA	0	50.17	NA	NA	NA	NA	CMS2	NA	NA	NA	NA	NA	GSE38832	CRC_AFFY
GSM950515	C1	NA	NA	NA	NA	NA	NA	Stage IV	NA	NA	NA	NA	NA	NA	NA	UNKNOWN	NA	NA	NA	NA	NA	GSE38832	CRC_AFFY
GSM950516	C4	NA	NA	NA	NA	NA	NA	Stage II	NA	0	89.17	NA	NA	NA	NA	UNKNOWN	NA	NA	NA	NA	NA	GSE38832	CRC_AFFY
GSM950517	C4	NA	NA	NA	NA	NA	NA	Stage III	NA	0	52.07	NA	NA	NA	NA	CMS1	NA	NA	NA	NA	NA	GSE38832	CRC_AFFY
GSM950518	C1	NA	NA	NA	NA	NA	NA	Stage IV	NA	NA	NA	NA	NA	NA	NA	UNKNOWN	NA	NA	NA	NA	NA	GSE38832	CRC_AFFY
GSM950519	C1	NA	NA	NA	NA	NA	NA	Stage II	NA	0	84.2	NA	NA	NA	NA	CMS2	NA	NA	NA	NA	NA	GSE38832	CRC_AFFY
GSM950520	C1	NA	NA	NA	NA	NA	NA	Stage III	NA	0	111.4	NA	NA	NA	NA	CMS2	NA	NA	NA	NA	NA	GSE38832	CRC_AFFY
GSM950521	C4	NA	NA	NA	NA	NA	NA	Stage III	NA	0	7.83	NA	NA	NA	NA	CMS1	NA	NA	NA	NA	NA	GSE38832	CRC_AFFY
GSM950522	C1	NA	NA	NA	NA	NA	NA	Stage II	NA	0	95.47	NA	NA	NA	NA	CMS2	NA	NA	NA	NA	NA	GSE38832	CRC_AFFY
GSM950523	C4	NA	NA	NA	NA	NA	NA	Stage II	NA	0	106.47	NA	NA	NA	NA	CMS3	NA	NA	NA	NA	NA	GSE38832	CRC_AFFY
GSM950524	C3	NA	NA	NA	NA	NA	NA	Stage IV	NA	NA	NA	NA	NA	NA	NA	CMS4	NA	NA	NA	NA	NA	GSE38832	CRC_AFFY
GSM950525	C1	NA	NA	NA	NA	NA	NA	Stage III	NA	0	92.47	NA	NA	NA	NA	CMS2	NA	NA	NA	NA	NA	GSE38832	CRC_AFFY
GSM950526	C3	NA	NA	NA	NA	NA	NA	Stage IV	NA	NA	NA	NA	NA	NA	NA	CMS4	NA	NA	NA	NA	NA	GSE38832	CRC_AFFY
GSM950527	C1	NA	NA	NA	NA	NA	NA	Stage IV	NA	NA	NA	NA	NA	NA	NA	CMS2	NA	NA	NA	NA	NA	GSE38832	CRC_AFFY
GSM950528	C4	NA	NA	NA	NA	NA	NA	Stage III	NA	0	92.2	NA	NA	NA	NA	UNKNOWN	NA	NA	NA	NA	NA	GSE38832	CRC_AFFY
GSM950529	C1	NA	NA	NA	NA	NA	NA	Stage III	NA	0	91.8	NA	NA	NA	NA	CMS3	NA	NA	NA	NA	NA	GSE38832	CRC_AFFY
GSM950530	C3	NA	NA	NA	NA	NA	NA	Stage IV	NA	NA	NA	NA	NA	NA	NA	CMS4	NA	NA	NA	NA	NA	GSE38832	CRC_AFFY
GSM950531	C2	NA	NA	NA	NA	NA	NA	Stage III	NA	0	21.57	NA	NA	NA	NA	CMS4	NA	NA	NA	NA	NA	GSE38832	CRC_AFFY
GSM950532	C4	NA	NA	NA	NA	NA	NA	Stage II	NA	0	33.07	NA	NA	NA	NA	CMS1	NA	NA	NA	NA	NA	GSE38832	CRC_AFFY
GSM971957	C4	34	<=65yr	Male	T4	N1	M1	Stage IV	NA	1	0	1	10	MSS	CIMP.Neg	CMS4	Left	N	1	0	CIT001	GSE39582	CRC_AFFY
GSM971958	C3	36	<=65yr	Female	T3	N1	M1	Stage IV	NA	1	0	1	9	MSS	CIMP.Neg	CMS4	Left	N	0	0	CIT002	GSE39582	CRC_AFFY
GSM971959	C1	36	<=65yr	Male	T4	N0	M0	Stage II	NA	1	4	0	52	MSS	CIMP.Neg	CMS1	Right	N	0	0	CIT003	GSE39582	CRC_AFFY
GSM971960	C2	38	<=65yr	Female	T2	N0	M0	Stage I	NA	0	74	0	74	MSS	CIMP.Low	CMS2	Left	N	0	0	CIT004	GSE39582	CRC_AFFY
GSM971961	C3	39	<=65yr	Female	T3	N1	M1	Stage IV	NA	1	1	1	32	MSS	CIMP.Neg	CMS4	Left	Y	0	0	CIT005	GSE39582	CRC_AFFY
GSM971962	C2	60	<=65yr	Male	T4	N1	M0	Stage III	NA	0	73	0	73	MSI	CIMP.Neg	CMS4	Right	Y	0	0	CIT006	GSE39582	CRC_AFFY
GSM971963	C4	78	>65yr	Male	T3	N0	M0	Stage II	NA	1	17	1	20	MSI	CIMP.Low	CMS1	Right	Y	0	0	CIT007	GSE39582	CRC_AFFY
GSM971964	C1	35	<=65yr	Female	T2	N1	M0	Stage III	NA	0	35	0	35	MSS	CIMP.Neg	CMS3	Left	N	0	0	CIT008	GSE39582	CRC_AFFY
GSM971965	C3	37	<=65yr	Female	T3	N0	M0	Stage II	NA	0	33	0	33	MSS	CIMP.Neg	CMS3	Left	N	1	0	CIT009	GSE39582	CRC_AFFY
GSM971966	C3	40	<=65yr	Female	T3	N1	M0	Stage III	NA	0	63	0	63	NA	CIMP.Low	CMS4	Left	N	1	0	CIT010	GSE39582	CRC_AFFY
GSM971967	C1	42	<=65yr	Male	T3	N0	M0	Stage II	NA	NA	31	1	31	MSS	CIMP.Low	CMS3	Right	N	1	0	CIT011	GSE39582	CRC_AFFY
GSM971968	C2	44	<=65yr	Female	T4	N0	M0	Stage II	NA	1	93	0	112	MSS	CIMP.Low	CMS4	Right	N	1	0	CIT012	GSE39582	CRC_AFFY
GSM971969	C4	30	<=65yr	Male	T1	N0	M0	Stage I	NA	0	63	0	63	MSI	CIMP.Neg	CMS1	Left	N	0	0	CIT013	GSE39582	CRC_AFFY
GSM971970	C1	31	<=65yr	Female	T2	N0	M0	Stage I	NA	0	86	0	86	MSI	CIMP.Neg	CMS3	Right	N	1	0	CIT014	GSE39582	CRC_AFFY
GSM971971	C4	34	<=65yr	Female	T4	N1	M1	Stage IV	NA	0	65	0	65	MSI	CIMP.Low	CMS3	Right	N	1	0	CIT015	GSE39582	CRC_AFFY
GSM971972	C4	40	<=65yr	Male	T2	N0	M0	Stage I	NA	0	75	0	75	MSI	CIMP.Neg	CMS4	Left	N	0	0	CIT016	GSE39582	CRC_AFFY
GSM971973	C1	24	<=65yr	Male	T3	N0	M0	Stage II	NA	0	46	0	46	MSS	CIMP.Neg	CMS1	Left	N	0	0	CIT017	GSE39582	CRC_AFFY
GSM971974	C3	40	<=65yr	Female	T4	N1	M1	Stage IV	NA	0	56	0	56	MSS	CIMP.Neg	CMS3	Left	N	1	0	CIT018	GSE39582	CRC_AFFY
GSM971975	C1	41	<=65yr	Female	T3	N0	M0	Stage II	NA	0	46	0	46	MSS	CIMP.Neg	CMS2	Left	N	0	0	CIT019	GSE39582	CRC_AFFY
GSM971976	C1	45	<=65yr	Female	T4	N0	M0	Stage II	NA	0	36	0	36	NA	CIMP.Neg	CMS2	Left	N	0	0	CIT020	GSE39582	CRC_AFFY
GSM971977	C2	40	<=65yr	Female	T4	N1	M0	Stage III	NA	0	49	0	49	MSI	CIMP.Low	CMS4	Right	N	1	0	CIT021	GSE39582	CRC_AFFY
GSM971978	C4	71	>65yr	Female	T2	N0	M0	Stage I	NA	0	109	0	109	MSI	NA	CMS1	Right	N	1	0	CIT022	GSE39582	CRC_AFFY
GSM971979	C3	66	>65yr	Female	T3	N0	M0	Stage II	NA	0	53	0	53	MSI	CIMP.High	CMS1	Right	N	0	0	CIT023	GSE39582	CRC_AFFY
GSM971980	C2	76	>65yr	Male	T4	N1	M0	Stage III	NA	0	59	0	59	MSI	CIMP.High	CMS1	Right	N	0	1	CIT024	GSE39582	CRC_AFFY
GSM971981	C4	81	>65yr	Male	T3	N0	M0	Stage II	NA	0	48	0	48	MSI	CIMP.Neg	CMS1	Right	N	1	0	CIT025	GSE39582	CRC_AFFY
GSM971982	C2	79	>65yr	Male	T4	N1	M0	Stage III	NA	0	42	1	42	MSI	CIMP.High	CMS1	Right	N	1	0	CIT026	GSE39582	CRC_AFFY
GSM971983	C4	75	>65yr	Male	T3	N1	M0	Stage III	NA	0	87	0	87	MSI	CIMP.High	CMS1	Right	N	0	1	CIT027	GSE39582	CRC_AFFY
GSM971984	C4	68	>65yr	Female	T4	N0	M0	Stage II	NA	1	5	0	81	MSI	CIMP.High	CMS1	Right	N	0	1	CIT028	GSE39582	CRC_AFFY
GSM971985	C4	66	>65yr	Male	T1	N0	M0	Stage I	NA	0	7	0	7	MSS	CIMP.Low	CMS3	Right	N	1	0	CIT029	GSE39582	CRC_AFFY
GSM971986	C2	66	>65yr	Male	T3	N0	M0	Stage II	NA	0	68	0	68	MSS	CIMP.Neg	CMS4	Right	N	0	0	CIT030	GSE39582	CRC_AFFY
GSM971987	C2	66	>65yr	Male	T3	N0	M0	Stage II	NA	0	68	0	68	MSS	CIMP.Neg	CMS4	Right	N	0	0	CIT031	GSE39582	CRC_AFFY
GSM971988	C3	77	>65yr	Female	T4	N1	M1	Stage IV	NA	1	15	1	18	MSS	CIMP.High	CMS1	Right	N	0	1	CIT032	GSE39582	CRC_AFFY
GSM971989	C3	71	>65yr	Male	T2	N0	M0	Stage I	NA	1	16	1	24	MSS	CIMP.Low	CMS3	Right	N	1	0	CIT033	GSE39582	CRC_AFFY
GSM971990	C4	83	>65yr	Male	T2	N0	M0	Stage I	NA	0	12	1	12	MSS	CIMP.High	CMS3	Right	N	1	0	CIT034	GSE39582	CRC_AFFY
GSM971991	C4	71	>65yr	Male	T3	N0	M0	Stage II	NA	0	55	1	55	MSS	CIMP.Neg	CMS4	Left	N	0	0	CIT035	GSE39582	CRC_AFFY
GSM971992	C4	85	>65yr	Male	T4	N0	M0	Stage II	NA	0	20	1	20	MSS	CIMP.Low	CMS2	Left	N	0	0	CIT036	GSE39582	CRC_AFFY
GSM971993	C4	67	>65yr	Male	T3	N0	M0	Stage II	NA	0	56	0	56	MSS	CIMP.Neg	CMS3	Left	N	1	0	CIT037	GSE39582	CRC_AFFY
GSM971994	C1	80	>65yr	Male	T3	N0	M0	Stage II	NA	0	43	0	43	MSS	CIMP.Low	CMS2	Right	N	0	0	CIT038	GSE39582	CRC_AFFY
GSM971995	C2	61	<=65yr	Female	T4	N0	M0	Stage II	NA	0	25	0	25	MSS	CIMP.Neg	CMS3	Left	N	0	0	CIT039	GSE39582	CRC_AFFY
GSM971996	C2	63	<=65yr	Female	T3	N1	M0	Stage III	NA	0	76	0	76	MSS	CIMP.Neg	CMS4	Right	N	0	0	CIT040	GSE39582	CRC_AFFY
GSM971997	C4	72	>65yr	Male	T3	N1	M0	Stage III	NA	0	89	0	89	MSS	CIMP.High	CMS1	Right	N	0	1	CIT041	GSE39582	CRC_AFFY
GSM971998	C2	74	>65yr	Male	T3	N1	M0	Stage III	NA	1	18	1	23	MSS	CIMP.Neg	CMS3	Right	N	1	0	CIT042	GSE39582	CRC_AFFY
GSM971999	C2	61	<=65yr	Male	T3	N1	M0	Stage III	NA	0	1	0	1	MSS	CIMP.Low	CMS4	Left	N	0	0	CIT043	GSE39582	CRC_AFFY
GSM972000	C1	76	>65yr	Female	T3	N1	M0	Stage III	NA	1	9	0	9	MSS	CIMP.Neg	CMS2	Left	Y	0	0	CIT044	GSE39582	CRC_AFFY
GSM972001	C4	71	>65yr	Male	T2	N1	M0	Stage III	NA	0	73	0	73	MSS	CIMP.Neg	CMS3	Left	N	0	0	CIT045	GSE39582	CRC_AFFY
GSM972002	C1	77	>65yr	Male	T4	N1	M0	Stage III	NA	1	25	0	26	MSS	CIMP.Low	CMS3	Left	N	1	0	CIT046	GSE39582	CRC_AFFY
GSM972003	C1	64	<=65yr	Male	T3	N1	M1	Stage IV	NA	1	0	1	27	MSS	CIMP.Low	CMS2	Right	Y	1	0	CIT047	GSE39582	CRC_AFFY
GSM972004	C3	62	<=65yr	Female	T3	N1	M1	Stage IV	NA	0	89	0	89	MSS	CIMP.Neg	CMS2	Right	N	1	0	CIT048	GSE39582	CRC_AFFY
GSM972005	C1	66	>65yr	Male	T4	N1	M1	Stage IV	NA	1	0	0	44	MSS	CIMP.Neg	CMS3	Right	N	1	0	CIT049	GSE39582	CRC_AFFY
GSM972006	C3	67	>65yr	Female	T3	N0	M1	Stage IV	NA	1	0	1	23	MSS	CIMP.Low	CMS4	Left	Y	0	0	CIT050	GSE39582	CRC_AFFY
GSM972007	C2	71	>65yr	Male	T4	N1	M1	Stage IV	NA	0	2	1	2	MSS	CIMP.High	CMS4	Right	N	0	1	CIT051	GSE39582	CRC_AFFY
GSM972008	C3	67	>65yr	Male	T4	N1	M1	Stage IV	NA	1	2	1	72	MSS	CIMP.High	CMS4	Left	N	0	1	CIT052	GSE39582	CRC_AFFY
GSM972009	C3	68	>65yr	Male	T3	N1	M1	Stage IV	NA	1	0	1	10	MSS	CIMP.Low	CMS3	Left	N	1	0	CIT053	GSE39582	CRC_AFFY
GSM972010	C3	74	>65yr	Male	T3	N1	M1	Stage IV	NA	1	10	1	46	MSS	CIMP.Low	CMS4	Left	N	1	0	CIT054	GSE39582	CRC_AFFY
GSM972011	C2	75	>65yr	Female	T4	N1	M1	Stage IV	NA	1	18	1	20	MSS	CIMP.High	CMS4	Left	N	0	1	CIT055	GSE39582	CRC_AFFY
GSM972012	C4	86	>65yr	Female	T3	N1	M1	Stage IV	NA	0	101	0	101	MSS	CIMP.Low	CMS3	Right	N	1	0	CIT056	GSE39582	CRC_AFFY
GSM972013	C3	89	>65yr	Female	T2	N1	M1	Stage IV	NA	0	43	1	43	MSS	CIMP.Neg	CMS2	Left	N	0	0	CIT057	GSE39582	CRC_AFFY
GSM972014	C1	65	<=65yr	Male	T3	N0	M1	Stage IV	NA	1	0	1	29	MSS	CIMP.Neg	CMS2	Left	Y	0	0	CIT058	GSE39582	CRC_AFFY
GSM972015	C1	92	>65yr	Female	T3	N0	M0	Stage II	NA	0	91	0	91	MSI	CIMP.High	CMS1	Left	N	1	0	CIT059	GSE39582	CRC_AFFY
GSM972016	C3	74	>65yr	Female	T3	N0	M0	Stage II	NA	1	14	1	16	MSI	CIMP.Neg	CMS1	Right	N	0	0	CIT060	GSE39582	CRC_AFFY
GSM972017	C2	73	>65yr	Female	T3	N1	M0	Stage III	NA	0	43	0	43	MSS	CIMP.Low	CMS4	Right	Y	1	0	CIT061	GSE39582	CRC_AFFY
GSM972018	C2	68	>65yr	Female	T2	N1	M0	Stage III	NA	0	117	0	117	MSS	CIMP.Neg	CMS4	Left	Y	0	0	CIT062	GSE39582	CRC_AFFY
GSM972019	C2	54	<=65yr	Male	T3	N1	M0	Stage III	NA	1	21	1	25	MSS	CIMP.High	CMS4	Right	Y	0	1	CIT063	GSE39582	CRC_AFFY
GSM972020	C3	49	<=65yr	Female	T3	N1	M0	Stage III	NA	1	9	0	78	MSS	CIMP.Neg	CMS4	Left	Y	0	0	CIT064	GSE39582	CRC_AFFY
GSM972021	C1	58	<=65yr	Female	T3	N1	M0	Stage III	NA	1	5	1	37	MSS	CIMP.Low	CMS4	Left	Y	0	0	CIT065	GSE39582	CRC_AFFY
GSM972022	C3	76	>65yr	Female	T3	N1	M0	Stage III	NA	0	82	0	82	MSS	CIMP.Low	CMS4	Right	Y	1	0	CIT066	GSE39582	CRC_AFFY
GSM972023	C3	59	<=65yr	Female	T3	N1	M0	Stage III	NA	1	6	0	16	MSS	CIMP.Neg	CMS4	Left	Y	1	0	CIT067	GSE39582	CRC_AFFY
GSM972024	C1	62	<=65yr	Male	T2	N1	M0	Stage III	NA	1	37	0	43	MSS	CIMP.Neg	CMS2	Left	Y	0	0	CIT068	GSE39582	CRC_AFFY
GSM972025	C3	49	<=65yr	Male	T3	N1	M0	Stage III	NA	0	53	0	53	MSS	CIMP.Neg	CMS3	Left	Y	0	0	CIT069	GSE39582	CRC_AFFY
GSM972026	C3	75	>65yr	Male	T3	N1	M0	Stage III	NA	1	32	1	34	MSS	CIMP.Low	CMS4	Left	Y	0	NA	CIT070	GSE39582	CRC_AFFY
GSM972027	C3	70	>65yr	Female	T3	N1	M0	Stage III	NA	0	94	0	94	MSS	CIMP.Neg	CMS4	Right	Y	0	0	CIT071	GSE39582	CRC_AFFY
GSM972028	C2	46	<=65yr	Female	T3	N1	M0	Stage III	NA	0	78	0	78	MSS	CIMP.High	CMS4	Right	Y	1	0	CIT072	GSE39582	CRC_AFFY
GSM972029	C3	58	<=65yr	Male	T4	N1	M0	Stage III	NA	0	36	0	36	MSS	CIMP.Neg	CMS4	Left	Y	0	0	CIT073	GSE39582	CRC_AFFY
GSM972030	C3	68	>65yr	Female	T3	N1	M0	Stage III	NA	0	52	0	52	MSS	CIMP.Low	CMS4	Right	Y	0	1	CIT074	GSE39582	CRC_AFFY
GSM972031	C3	81	>65yr	Male	T3	N0	M0	Stage II	NA	0	55	0	55	MSS	NA	CMS2	Left	N	NA	NA	CIT075	GSE39582	CRC_AFFY
GSM972032	C3	64	<=65yr	Female	T3	N0	M0	Stage II	NA	0	60	0	60	MSS	CIMP.Low	CMS2	Right	N	0	0	CIT076	GSE39582	CRC_AFFY
GSM972033	C1	45	<=65yr	Female	T4	N0	M0	Stage II	NA	0	50	0	50	MSS	NA	CMS2	Left	N	NA	NA	CIT077	GSE39582	CRC_AFFY
GSM972034	C1	77	>65yr	Male	T3	N0	M0	Stage II	NA	0	50	0	50	MSS	CIMP.Neg	UNKNOWN	Right	N	1	0	CIT078	GSE39582	CRC_AFFY
GSM972035	C1	94	>65yr	Female	T3	N0	M0	Stage II	NA	0	39	0	39	MSS	CIMP.Neg	UNKNOWN	Right	N	0	0	CIT079	GSE39582	CRC_AFFY
GSM972036	C1	47	<=65yr	Female	T4	N0	M0	Stage II	NA	0	50	0	50	MSS	NA	CMS3	Right	N	NA	NA	CIT080	GSE39582	CRC_AFFY
GSM972037	C1	78	>65yr	Male	T4	N0	M0	Stage II	NA	0	33	0	33	MSS	CIMP.High	CMS1	Right	N	1	0	CIT081	GSE39582	CRC_AFFY
GSM972038	C1	61	<=65yr	Male	T3	N0	M0	Stage II	NA	0	1	1	1	MSS	CIMP.Neg	CMS2	Left	N	0	0	CIT082	GSE39582	CRC_AFFY
GSM972039	C3	65	<=65yr	Male	T4	N0	M1	Stage IV	NA	1	0	1	52	MSS	CIMP.Low	CMS4	Left	Y	0	0	CIT083	GSE39582	CRC_AFFY
GSM972040	C1	81	>65yr	Male	T3	N0	M0	Stage II	NA	0	63	0	63	MSS	CIMP.Low	CMS2	Left	N	0	0	CIT084	GSE39582	CRC_AFFY
GSM972041	C3	78	>65yr	Male	T3	N0	M0	Stage II	NA	0	55	0	55	MSS	CIMP.Low	CMS2	Left	N	1	0	CIT085	GSE39582	CRC_AFFY
GSM972042	C4	83	>65yr	Male	T3	N0	M0	Stage II	NA	0	51	0	51	MSS	CIMP.Neg	CMS3	Right	N	1	0	CIT086	GSE39582	CRC_AFFY
GSM972043	C1	56	<=65yr	Male	T3	N0	M1	Stage IV	NA	1	0	1	27	MSS	CIMP.Neg	CMS2	Left	Y	0	0	CIT087	GSE39582	CRC_AFFY
GSM972044	C1	58	<=65yr	Male	T4	N0	M0	Stage II	NA	0	42	0	42	MSS	CIMP.High	CMS3	Right	Y	0	0	CIT088	GSE39582	CRC_AFFY
GSM972045	C1	71	>65yr	Male	T3	N0	M1	Stage IV	NA	1	0	1	11	MSS	CIMP.Neg	CMS3	Right	Y	1	0	CIT089	GSE39582	CRC_AFFY
GSM972046	C2	54	<=65yr	Male	T3	N0	M0	Stage II	NA	1	21	0	58	MSS	CIMP.Low	CMS4	Left	N	0	0	CIT090	GSE39582	CRC_AFFY
GSM972047	C3	93	>65yr	Female	T3	N0	M0	Stage II	NA	0	33	0	33	MSS	CIMP.Neg	CMS4	Right	N	1	0	CIT091	GSE39582	CRC_AFFY
GSM972048	C1	50	<=65yr	Female	T4	N0	M1	Stage IV	NA	1	0	0	30	MSS	CIMP.Neg	CMS2	Left	Y	1	0	CIT092	GSE39582	CRC_AFFY
GSM972049	C1	79	>65yr	Male	T3	N0	M0	Stage II	NA	0	26	0	26	MSS	CIMP.Neg	CMS3	Right	N	1	0	CIT093	GSE39582	CRC_AFFY
GSM972050	C2	75	>65yr	Female	T3	N0	M0	Stage II	NA	0	19	0	19	MSS	CIMP.Neg	CMS3	Left	N	1	0	CIT094	GSE39582	CRC_AFFY
GSM972051	C3	34	<=65yr	Female	T3	N0	M1	Stage IV	NA	1	0	1	28	MSS	CIMP.Neg	CMS4	Left	Y	1	0	CIT095	GSE39582	CRC_AFFY
GSM972052	C1	68	>65yr	Male	T2	N0	M0	Stage I	NA	0	15	0	15	MSS	NA	CMS2	Left	N	1	0	CIT096	GSE39582	CRC_AFFY
GSM972053	C1	55	<=65yr	Male	T2	N0	M0	Stage I	NA	0	29	0	29	MSS	CIMP.Low	UNKNOWN	Right	N	0	0	CIT097	GSE39582	CRC_AFFY
GSM972054	C3	82	>65yr	Male	T3	N0	M0	Stage II	NA	0	26	0	26	MSS	CIMP.Low	CMS4	Right	N	1	0	CIT098	GSE39582	CRC_AFFY
GSM972055	C4	31	<=65yr	Female	T4	N0	M0	Stage II	NA	0	93	0	93	NA	CIMP.Neg	CMS4	Left	N	0	0	CIT099	GSE39582	CRC_AFFY
GSM972056	C2	78	>65yr	Female	T4	N0	M0	Stage II	NA	0	92	0	92	NA	CIMP.High	CMS1	Right	N	0	1	CIT100	GSE39582	CRC_AFFY
GSM972057	C1	70	>65yr	Male	T3	N0	M0	Stage II	NA	0	26	1	26	NA	CIMP.Neg	UNKNOWN	Left	N	0	0	CIT101	GSE39582	CRC_AFFY
GSM972058	C4	75	>65yr	Female	T3	N0	M0	Stage II	NA	0	60	0	60	NA	CIMP.High	CMS1	Right	N	0	1	CIT102	GSE39582	CRC_AFFY
GSM972059	C2	76	>65yr	Female	T3	N0	M0	Stage II	NA	0	59	0	59	NA	CIMP.High	CMS4	Left	N	0	1	CIT103	GSE39582	CRC_AFFY
GSM972060	C4	66	>65yr	Male	T3	N0	M0	Stage II	NA	0	82	0	82	NA	CIMP.Neg	CMS4	Left	N	0	0	CIT104	GSE39582	CRC_AFFY
GSM972061	C2	78	>65yr	Female	T4	N0	M0	Stage II	NA	0	43	1	43	NA	CIMP.Neg	UNKNOWN	Left	N	0	0	CIT105	GSE39582	CRC_AFFY
GSM972062	C3	43	<=65yr	Female	T4	N0	M0	Stage II	NA	1	0	1	23	MSS	CIMP.Neg	CMS3	Left	Y	1	0	CIT106	GSE39582	CRC_AFFY
GSM972063	C3	54	<=65yr	Male	T3	N0	M0	Stage II	NA	0	70	0	70	NA	CIMP.Neg	CMS4	Left	N	1	0	CIT107	GSE39582	CRC_AFFY
GSM972064	C2	60	<=65yr	Male	T4	N0	M1	Stage IV	NA	1	0	1	22	NA	CIMP.Low	CMS4	Left	Y	1	0	CIT108	GSE39582	CRC_AFFY
GSM972065	C3	48	<=65yr	Male	T3	N0	M0	Stage II	NA	0	46	0	46	NA	CIMP.Neg	CMS4	Left	Y	0	0	CIT109	GSE39582	CRC_AFFY
GSM972066	C4	69	>65yr	Male	T4	N0	M1	Stage IV	NA	1	0	0	49	NA	CIMP.Low	CMS2	Left	Y	0	0	CIT110	GSE39582	CRC_AFFY
GSM972067	C2	83	>65yr	Female	T3	N0	M0	Stage II	NA	0	183	1	183	NA	CIMP.Neg	CMS4	Left	N	0	0	CIT111	GSE39582	CRC_AFFY
GSM972068	C2	44	<=65yr	Male	T4	N0	M0	Stage II	NA	1	3	1	22	NA	CIMP.Neg	CMS4	Left	Y	1	0	CIT112	GSE39582	CRC_AFFY
GSM972069	C1	68	>65yr	Male	T3	N0	M0	Stage II	NA	0	201	0	201	NA	CIMP.Low	CMS4	Right	N	1	0	CIT113	GSE39582	CRC_AFFY
GSM972070	C2	64	<=65yr	Female	T4	N0	M0	Stage II	NA	0	68	1	68	NA	CIMP.Neg	CMS3	Left	Y	1	0	CIT114	GSE39582	CRC_AFFY
GSM972071	C3	68	>65yr	Female	T3	N0	M0	Stage II	NA	0	183	0	183	NA	CIMP.Low	CMS2	Left	N	0	0	CIT115	GSE39582	CRC_AFFY
GSM972072	C4	70	>65yr	Female	T4	N0	M0	Stage II	NA	0	172	0	172	NA	CIMP.High	CMS1	Right	N	0	1	CIT116	GSE39582	CRC_AFFY
GSM972073	C2	80	>65yr	Female	T3	N0	M0	Stage II	NA	0	163	0	163	NA	CIMP.High	CMS4	Right	N	1	0	CIT117	GSE39582	CRC_AFFY
GSM972074	C4	70	>65yr	Female	T4	N0	M0	Stage II	NA	1	1	1	75	NA	CIMP.Neg	CMS2	Left	Y	0	0	CIT118	GSE39582	CRC_AFFY
GSM972075	C4	42	<=65yr	Male	T4	N0	M0	Stage II	NA	0	44	1	44	NA	CIMP.Neg	UNKNOWN	Left	N	0	0	CIT119	GSE39582	CRC_AFFY
GSM972076	C4	48	<=65yr	Male	T3	N0	M0	Stage II	NA	0	153	0	153	NA	CIMP.Low	CMS4	Right	N	0	0	CIT120	GSE39582	CRC_AFFY
GSM972077	C2	58	<=65yr	Female	T3	N0	M0	Stage II	NA	1	26	1	31	NA	CIMP.Neg	CMS4	Left	N	1	0	CIT121	GSE39582	CRC_AFFY
GSM972078	C3	63	<=65yr	Male	T3	N0	M0	Stage II	NA	1	54	1	145	NA	CIMP.Neg	CMS4	Left	Y	0	0	CIT122	GSE39582	CRC_AFFY
GSM972079	C2	44	<=65yr	Male	T3	N0	M0	Stage II	NA	0	168	0	168	NA	CIMP.Neg	CMS4	Left	Y	0	0	CIT123	GSE39582	CRC_AFFY
GSM972080	C3	61	<=65yr	Male	T4	N0	M0	Stage II	NA	1	53	0	165	NA	CIMP.High	CMS1	Left	Y	1	0	CIT124	GSE39582	CRC_AFFY
GSM972081	C3	68	>65yr	Female	T3	N0	M0	Stage II	NA	0	26	0	26	NA	CIMP.Neg	CMS2	Left	N	1	0	CIT125	GSE39582	CRC_AFFY
GSM972082	C2	75	>65yr	Male	T3	N0	M0	Stage II	NA	1	119	1	132	NA	CIMP.Low	CMS4	Left	Y	1	0	CIT126	GSE39582	CRC_AFFY
GSM972083	C2	65	<=65yr	Female	T3	N0	M0	Stage II	NA	0	127	0	127	NA	CIMP.Neg	CMS4	Left	N	0	0	CIT127	GSE39582	CRC_AFFY
GSM972084	C2	73	>65yr	Female	T3	N0	M0	Stage II	NA	0	129	0	129	NA	CIMP.Neg	CMS4	Left	N	0	0	CIT128	GSE39582	CRC_AFFY
GSM972085	C4	56	<=65yr	Male	T3	N0	M0	Stage II	NA	0	97	0	97	NA	CIMP.Neg	CMS4	Right	N	0	0	CIT129	GSE39582	CRC_AFFY
GSM972086	C1	81	>65yr	Male	T3	N0	M0	Stage II	NA	0	43	1	43	MSS	CIMP.Low	UNKNOWN	Left	N	0	0	CIT130	GSE39582	CRC_AFFY
GSM972087	C4	84	>65yr	Female	T3	N0	M0	Stage II	NA	1	8	1	32	MSS	CIMP.Neg	CMS2	Right	N	0	0	CIT131	GSE39582	CRC_AFFY
GSM972088	C2	73	>65yr	Female	T4	N0	M0	Stage II	NA	0	79	0	79	MSS	CIMP.Neg	CMS4	Left	N	0	0	CIT132	GSE39582	CRC_AFFY
GSM972089	C3	68	>65yr	Female	T3	N0	M0	Stage II	NA	0	87	0	87	MSS	CIMP.High	CMS4	Right	N	0	0	CIT133	GSE39582	CRC_AFFY
GSM972090	C1	72	>65yr	Female	T3	N0	M0	Stage II	NA	0	69	0	69	MSS	CIMP.Low	CMS2	Left	N	0	0	CIT134	GSE39582	CRC_AFFY
GSM972091	C1	67	>65yr	Male	T3	N0	M0	Stage II	NA	1	45	0	70	MSS	CIMP.Neg	CMS3	Left	N	1	0	CIT135	GSE39582	CRC_AFFY
GSM972092	C3	76	>65yr	Female	T3	N0	M0	Stage II	NA	0	47	0	47	MSS	CIMP.Low	CMS4	Left	N	1	0	CIT136	GSE39582	CRC_AFFY
GSM972093	C3	55	<=65yr	Female	T4	N0	M0	Stage II	NA	0	74	0	74	MSS	CIMP.Neg	CMS4	Left	Y	0	0	CIT137	GSE39582	CRC_AFFY
GSM972094	C3	67	>65yr	Female	T3	N0	M0	Stage II	NA	0	61	0	61	MSS	CIMP.Neg	CMS4	Right	N	1	0	CIT138	GSE39582	CRC_AFFY
GSM972095	C3	50	<=65yr	Male	T3	N0	M0	Stage II	NA	0	67	0	67	MSS	CIMP.Neg	CMS4	Left	N	1	0	CIT139	GSE39582	CRC_AFFY
GSM972096	C1	63	<=65yr	Female	T2	N1	M0	Stage III	NA	1	3	0	15	MSS	CIMP.Low	CMS2	Left	Y	0	0	CIT140	GSE39582	CRC_AFFY
GSM972097	C3	64	<=65yr	Male	T4	N1	M0	Stage III	NA	1	12	1	12	MSS	CIMP.Neg	CMS4	Right	Y	1	0	CIT141	GSE39582	CRC_AFFY
GSM972098	C1	66	>65yr	Male	T4	N1	M0	Stage III	NA	0	15	1	15	MSS	CIMP.High	CMS3	Left	Y	1	0	CIT142	GSE39582	CRC_AFFY
GSM972099	C1	78	>65yr	Male	T3	N1	M0	Stage III	NA	0	15	0	15	MSS	CIMP.Neg	CMS2	Left	Y	0	0	CIT143	GSE39582	CRC_AFFY
GSM972100	C1	71	>65yr	Female	T4	N1	M0	Stage III	NA	0	25	0	25	MSS	CIMP.Low	CMS1	Right	Y	1	0	CIT144	GSE39582	CRC_AFFY
GSM972101	C2	56	<=65yr	Male	T3	N1	M0	Stage III	NA	1	21	0	35	MSS	NA	CMS3	Left	Y	NA	NA	CIT145	GSE39582	CRC_AFFY
GSM972102	C2	22	<=65yr	Male	T3	N1	M0	Stage III	NA	0	46	0	46	MSS	NA	CMS4	Left	Y	NA	NA	CIT146	GSE39582	CRC_AFFY
GSM972103	C2	66	>65yr	Male	T3	N1	M0	Stage III	NA	1	28	0	58	MSS	CIMP.Neg	CMS4	Left	Y	1	0	CIT147	GSE39582	CRC_AFFY
GSM972104	C3	72	>65yr	Female	T3	N1	M0	Stage III	NA	0	41	0	41	MSS	CIMP.Low	CMS4	Right	Y	1	0	CIT148	GSE39582	CRC_AFFY
GSM972105	C2	53	<=65yr	Male	T2	N1	M0	Stage III	NA	0	32	0	32	MSS	CIMP.Neg	CMS4	Left	Y	0	0	CIT149	GSE39582	CRC_AFFY
GSM972106	C1	96	>65yr	Female	T3	N1	M0	Stage III	NA	1	9	0	72	MSS	NA	CMS4	Left	Y	NA	NA	CIT150	GSE39582	CRC_AFFY
GSM972107	C2	76	>65yr	Male	T3	N1	M0	Stage III	NA	0	60	1	60	MSS	CIMP.Low	CMS1	Left	Y	0	0	CIT151	GSE39582	CRC_AFFY
GSM972108	C4	64	<=65yr	Male	T4	N1	M0	Stage III	NA	0	103	0	103	MSS	NA	CMS2	Left	Y	NA	NA	CIT152	GSE39582	CRC_AFFY
GSM972109	C4	96	>65yr	Male	T3	N1	M0	Stage III	NA	0	36	0	36	MSS	CIMP.Neg	CMS1	Right	Y	0	0	CIT153	GSE39582	CRC_AFFY
GSM972110	C4	76	>65yr	Male	T4	N1	M0	Stage III	NA	1	4	1	7	MSS	NA	CMS1	Right	Y	NA	NA	CIT154	GSE39582	CRC_AFFY
GSM972111	C2	63	<=65yr	Male	T3	N1	M0	Stage III	NA	1	13	0	22	MSS	NA	CMS3	Left	Y	NA	NA	CIT155	GSE39582	CRC_AFFY
GSM972112	C2	64	<=65yr	Female	T3	N1	M0	Stage III	NA	0	32	1	32	MSS	NA	CMS4	Right	Y	NA	NA	CIT156	GSE39582	CRC_AFFY
GSM972113	C3	63	<=65yr	Female	T3	N1	M0	Stage III	NA	1	18	0	27	MSS	NA	CMS4	Right	Y	NA	NA	CIT157	GSE39582	CRC_AFFY
GSM972114	C1	73	>65yr	Male	T3	N1	M0	Stage III	NA	0	46	0	46	MSS	CIMP.Low	CMS3	Right	Y	0	1	CIT158	GSE39582	CRC_AFFY
GSM972115	C3	59	<=65yr	Female	T3	N1	M0	Stage III	NA	1	11	1	75	MSS	CIMP.Neg	CMS3	Left	Y	0	0	CIT159	GSE39582	CRC_AFFY
GSM972116	C2	79	>65yr	Female	T3	N1	M0	Stage III	NA	1	2	1	29	MSS	CIMP.Low	CMS4	Left	Y	0	0	CIT160	GSE39582	CRC_AFFY
GSM972117	C2	78	>65yr	Female	T3	N1	M0	Stage III	NA	1	11	0	32	NA	CIMP.High	CMS1	Right	Y	0	1	CIT161	GSE39582	CRC_AFFY
GSM972118	C1	64	<=65yr	Male	T3	N1	M0	Stage III	NA	1	19	0	30	MSS	CIMP.Neg	CMS1	Left	Y	1	0	CIT162	GSE39582	CRC_AFFY
GSM972119	C1	96	>65yr	Male	T4	N1	M0	Stage III	NA	1	25	0	37	MSS	NA	CMS2	Left	Y	NA	NA	CIT163	GSE39582	CRC_AFFY
GSM972120	C4	96	>65yr	Female	T3	N1	M0	Stage III	NA	0	36	0	36	MSS	NA	CMS4	Right	Y	NA	NA	CIT164	GSE39582	CRC_AFFY
GSM972121	C2	96	>65yr	Male	T3	N1	M0	Stage III	NA	0	35	0	35	MSS	CIMP.Neg	CMS3	Left	Y	1	0	CIT165	GSE39582	CRC_AFFY
GSM972122	C1	97	>65yr	Female	T4	N1	M0	Stage III	NA	1	19	1	19	MSS	NA	UNKNOWN	Right	Y	NA	NA	CIT166	GSE39582	CRC_AFFY
GSM972123	C1	53	<=65yr	Male	T3	N0	M0	Stage II	NA	0	71	0	71	MSS	NA	CMS2	Right	N	NA	NA	CIT167	GSE39582	CRC_AFFY
GSM972124	C2	49	<=65yr	Female	T3	N0	M0	Stage II	NA	0	75	0	75	MSS	CIMP.Neg	CMS2	Left	Y	0	0	CIT168	GSE39582	CRC_AFFY
GSM972125	C3	64	<=65yr	Female	T3	N0	M0	Stage II	NA	1	14	0	68	MSS	CIMP.Neg	CMS4	Left	Y	0	0	CIT169	GSE39582	CRC_AFFY
GSM972126	C1	61	<=65yr	Male	T3	N0	M0	Stage II	NA	0	63	0	63	MSS	NA	CMS2	Left	N	NA	NA	CIT170	GSE39582	CRC_AFFY
GSM972127	C2	66	>65yr	Female	T3	N0	M0	Stage II	NA	0	85	0	85	MSS	CIMP.Neg	CMS4	Left	N	1	0	CIT171	GSE39582	CRC_AFFY
GSM972128	C3	64	<=65yr	Male	T3	N0	M0	Stage II	NA	0	93	0	93	MSS	CIMP.Neg	CMS4	Left	Y	0	0	CIT172	GSE39582	CRC_AFFY
GSM972129	C1	76	>65yr	Male	T2	N0	M0	Stage I	NA	0	11	0	11	MSS	CIMP.Neg	CMS1	Left	N	1	0	CIT173	GSE39582	CRC_AFFY
GSM972130	C1	76	>65yr	Male	T4	N0	M0	Stage II	NA	0	55	0	55	MSS	CIMP.Neg	CMS2	Left	N	0	0	CIT174	GSE39582	CRC_AFFY
GSM972131	C3	78	>65yr	Female	T3	N0	M0	Stage II	NA	0	86	0	86	MSS	CIMP.Neg	CMS4	Right	N	1	0	CIT175	GSE39582	CRC_AFFY
GSM972132	C3	87	>65yr	Female	T3	N0	M0	Stage II	NA	0	61	1	61	MSS	CIMP.Neg	CMS4	Left	N	1	0	CIT176	GSE39582	CRC_AFFY
GSM972133	C2	64	<=65yr	Male	T3	NA	M0	Stage III	NA	1	27	1	53	MSS	NA	CMS4	Left	Y	0	NA	CIT177	GSE39582	CRC_AFFY
GSM972134	C3	74	>65yr	Male	T3	N1	M0	Stage III	NA	1	7	1	14	MSS	NA	CMS4	Left	N	0	NA	CIT178	GSE39582	CRC_AFFY
GSM972135	C1	78	>65yr	Female	T3	N0	M0	Stage II	NA	1	4	1	13	MSS	NA	CMS3	Left	N	1	NA	CIT179	GSE39582	CRC_AFFY
GSM972136	C1	54	<=65yr	Male	T3	N1	M0	Stage III	NA	1	61	0	130	MSS	NA	CMS2	Left	Y	0	0	CIT180	GSE39582	CRC_AFFY
GSM972137	C1	68	>65yr	Male	T3	N0	M0	Stage II	NA	1	9	0	129	MSS	NA	CMS2	Left	Y	0	NA	CIT181	GSE39582	CRC_AFFY
GSM972138	C1	77	>65yr	Male	T3	N0	M0	Stage II	NA	1	45	1	53	MSS	NA	UNKNOWN	Left	N	0	NA	CIT182	GSE39582	CRC_AFFY
GSM972139	C1	69	>65yr	Female	T3	N1	M0	Stage III	NA	1	38	0	102	MSS	NA	CMS2	Left	Y	0	NA	CIT183	GSE39582	CRC_AFFY
GSM972140	C3	64	<=65yr	Male	T4	N0	M0	Stage II	NA	1	56	0	172	MSS	NA	CMS4	Left	N	1	NA	CIT184	GSE39582	CRC_AFFY
GSM972141	C3	58	<=65yr	Male	T3	N1	M0	Stage III	NA	1	15	0	84	MSS	NA	CMS4	Left	Y	0	NA	CIT185	GSE39582	CRC_AFFY
GSM972142	C3	86	>65yr	Female	T3	N1	M0	Stage III	NA	1	2	1	35	MSS	CIMP.Neg	CMS2	Right	N	1	0	CIT186	GSE39582	CRC_AFFY
GSM972143	C4	57	<=65yr	Male	T4	N0	M0	Stage II	NA	0	154	0	154	MSS	NA	CMS2	Left	N	0	0	CIT187	GSE39582	CRC_AFFY
GSM972144	C2	63	<=65yr	Female	T3	N0	M0	Stage II	NA	0	121	0	121	MSS	CIMP.Low	CMS2	Left	N	0	0	CIT188	GSE39582	CRC_AFFY
GSM972145	C2	63	<=65yr	Female	T3	N1	M0	Stage III	NA	0	135	0	135	MSS	NA	CMS2	Left	Y	0	NA	CIT189	GSE39582	CRC_AFFY
GSM972146	C3	60	<=65yr	Male	T3	N1	M0	Stage III	NA	0	66	0	66	MSS	NA	CMS4	Left	Y	1	NA	CIT190	GSE39582	CRC_AFFY
GSM972147	C3	79	>65yr	Male	T3	N0	M0	Stage II	NA	0	140	0	140	MSS	CIMP.Neg	CMS2	Left	N	0	0	CIT191	GSE39582	CRC_AFFY
GSM972148	C4	59	<=65yr	Male	T3	N1	M0	Stage III	NA	0	127	0	127	MSS	NA	CMS2	Left	Y	1	NA	CIT192	GSE39582	CRC_AFFY
GSM972149	C2	64	<=65yr	Male	T3	N0	M0	Stage II	NA	0	132	0	132	MSS	NA	CMS2	Left	N	0	NA	CIT193	GSE39582	CRC_AFFY
GSM972150	C2	55	<=65yr	Female	T3	N1	M0	Stage III	NA	0	109	0	109	MSS	NA	CMS2	Left	Y	0	NA	CIT194	GSE39582	CRC_AFFY
GSM972151	C1	75	>65yr	Female	T3	N1	M0	Stage III	NA	0	77	0	77	MSS	NA	CMS2	Left	Y	1	NA	CIT195	GSE39582	CRC_AFFY
GSM972152	C1	70	>65yr	Female	T3	N1	M0	Stage III	NA	0	56	0	56	MSS	NA	CMS2	Right	Y	1	NA	CIT196	GSE39582	CRC_AFFY
GSM972153	C3	71	>65yr	Male	T3	N0	M0	Stage II	NA	0	66	1	66	MSS	NA	CMS2	Left	N	0	0	CIT197	GSE39582	CRC_AFFY
GSM972154	C1	49	<=65yr	Female	T4	N1	M0	Stage III	NA	1	3	1	44	MSS	NA	UNKNOWN	Left	Y	1	NA	CIT198	GSE39582	CRC_AFFY
GSM972155	C1	42	<=65yr	Male	T3	N1	M0	Stage III	NA	1	6	1	24	MSS	NA	CMS3	Left	Y	1	NA	CIT199	GSE39582	CRC_AFFY
GSM972156	C3	67	>65yr	Male	T3	N1	M0	Stage III	NA	0	112	1	112	MSS	NA	CMS2	Left	Y	0	NA	CIT200	GSE39582	CRC_AFFY
GSM972157	C3	57	<=65yr	Male	T3	N1	M0	Stage III	NA	0	118	0	118	MSS	NA	CMS4	Left	Y	0	NA	CIT201	GSE39582	CRC_AFFY
GSM972158	C2	45	<=65yr	Female	T3	N1	M0	Stage III	NA	0	120	0	120	MSS	NA	CMS4	Right	Y	1	NA	CIT202	GSE39582	CRC_AFFY
GSM972159	C1	67	>65yr	Male	T3	N1	M0	Stage III	NA	0	93	0	93	MSS	CIMP.Neg	CMS3	Right	Y	1	0	CIT203	GSE39582	CRC_AFFY
GSM972160	C2	73	>65yr	Male	T3	N0	M0	Stage II	NA	1	39	0	77	MSS	NA	CMS4	Left	N	0	NA	CIT204	GSE39582	CRC_AFFY
GSM972161	C1	91	>65yr	Female	T3	N0	M0	Stage II	NA	1	9	1	11	MSS	NA	UNKNOWN	Left	N	1	NA	CIT205	GSE39582	CRC_AFFY
GSM972162	C3	73	>65yr	Female	T3	N1	M0	Stage III	NA	0	77	0	77	MSS	NA	CMS4	Left	Y	0	NA	CIT206	GSE39582	CRC_AFFY
GSM972163	C2	71	>65yr	Male	T4	N0	M0	Stage II	NA	0	41	0	41	MSS	NA	CMS3	Left	Y	0	NA	CIT207	GSE39582	CRC_AFFY
GSM972164	C3	70	>65yr	Male	T3	NA	M0	Stage III	NA	1	3	1	69	MSS	NA	CMS4	Left	Y	0	NA	CIT208	GSE39582	CRC_AFFY
GSM972165	C3	67	>65yr	Male	T4	N0	M0	Stage II	NA	1	36	1	87	MSS	NA	CMS4	Right	N	0	NA	CIT209	GSE39582	CRC_AFFY
GSM972166	C3	42	<=65yr	Female	T3	NA	M0	Stage III	NA	1	3	1	12	MSS	NA	CMS3	Left	Y	1	NA	CIT210	GSE39582	CRC_AFFY
GSM972167	C4	47	<=65yr	Male	T3	N0	M0	Stage II	NA	1	36	1	45	MSS	CIMP.Low	CMS2	Left	N	0	0	CIT211	GSE39582	CRC_AFFY
GSM972168	C2	76	>65yr	Male	T4	NA	M0	Stage III	NA	1	4	1	8	MSS	NA	CMS1	Right	N	0	NA	CIT212	GSE39582	CRC_AFFY
GSM972169	C2	50	<=65yr	Male	T4	N0	M0	Stage II	NA	0	164	0	164	MSS	NA	CMS2	Left	N	0	NA	CIT213	GSE39582	CRC_AFFY
GSM972170	C4	67	>65yr	Female	T2	N1	M0	Stage III	NA	0	73	0	73	MSS	NA	CMS4	Left	N	0	NA	CIT214	GSE39582	CRC_AFFY
GSM972171	C2	70	>65yr	Female	T4	N1	M0	Stage III	NA	0	130	0	130	MSS	NA	CMS1	Right	N	0	NA	CIT215	GSE39582	CRC_AFFY
GSM972172	C2	88	>65yr	Female	T4	N0	M0	Stage II	NA	1	4	1	5	MSS	CIMP.High	UNKNOWN	Right	N	1	0	CIT216	GSE39582	CRC_AFFY
GSM972173	C1	59	<=65yr	Female	T4	N0	M0	Stage II	NA	1	15	1	26	MSS	CIMP.Neg	UNKNOWN	Left	Y	1	0	CIT217	GSE39582	CRC_AFFY
GSM972174	C1	75	>65yr	Male	T3	N1	M0	Stage III	NA	0	97	0	97	MSS	CIMP.Neg	CMS2	Left	Y	0	0	CIT218	GSE39582	CRC_AFFY
GSM972175	C1	83	>65yr	Female	T3	N1	M0	Stage III	NA	1	28	1	43	MSS	CIMP.Neg	UNKNOWN	Left	N	1	0	CIT219	GSE39582	CRC_AFFY
GSM972176	C2	85	>65yr	Female	T4	N1	M0	Stage III	NA	1	35	1	36	MSS	CIMP.Low	CMS4	Right	N	0	0	CIT220	GSE39582	CRC_AFFY
GSM972177	C2	71	>65yr	Male	NA	NA	NA	Stage II	NA	1	20	1	22	MSS	CIMP.Neg	CMS2	Right	N	1	0	CIT221	GSE39582	CRC_AFFY
GSM972178	C2	69	>65yr	Female	NA	NA	NA	Stage III	NA	1	21	0	67	MSS	CIMP.Low	CMS3	Right	Y	1	0	CIT222	GSE39582	CRC_AFFY
GSM972179	C2	77	>65yr	Male	NA	NA	NA	Stage II	NA	1	17	1	18	MSS	NA	CMS4	Left	N	0	0	CIT223	GSE39582	CRC_AFFY
GSM972180	C4	66	>65yr	Female	NA	NA	NA	Stage II	NA	1	19	1	24	MSS	CIMP.High	CMS1	Left	Y	0	0	CIT224	GSE39582	CRC_AFFY
GSM972181	C3	69	>65yr	Male	NA	NA	NA	Stage III	NA	1	13	1	34	MSS	NA	CMS4	Right	Y	1	0	CIT225	GSE39582	CRC_AFFY
GSM972182	C1	53	<=65yr	Male	T4	N0	M0	Stage II	NA	1	23	1	58	MSS	CIMP.Neg	CMS2	Left	N	0	0	CIT226	GSE39582	CRC_AFFY
GSM972183	C2	62	<=65yr	Female	NA	NA	NA	Stage III	NA	1	11	1	32	MSS	NA	CMS3	Left	Y	1	0	CIT227	GSE39582	CRC_AFFY
GSM972184	C2	70	>65yr	Female	NA	NA	NA	Stage II	NA	1	4	1	39	MSS	CIMP.High	CMS4	Right	N	0	1	CIT228	GSE39582	CRC_AFFY
GSM972185	C1	58	<=65yr	Female	NA	NA	NA	Stage III	NA	1	22	0	39	MSS	CIMP.Neg	UNKNOWN	Left	Y	0	0	CIT229	GSE39582	CRC_AFFY
GSM972186	C2	50	<=65yr	Female	NA	NA	NA	Stage III	NA	1	14	1	47	MSS	CIMP.Neg	CMS4	Right	Y	1	0	CIT230	GSE39582	CRC_AFFY
GSM972187	C3	62	<=65yr	Male	T3	N0	M0	Stage II	NA	1	9	0	49	MSS	NA	CMS4	Right	N	0	0	CIT231	GSE39582	CRC_AFFY
GSM972188	C2	58	<=65yr	Female	T3	N1	M0	Stage III	NA	1	11	0	22	MSS	CIMP.Low	UNKNOWN	Left	Y	1	0	CIT232	GSE39582	CRC_AFFY
GSM972189	C4	63	<=65yr	Male	T4	NA	M0	Stage III	NA	0	192	0	192	MSS	CIMP.Neg	UNKNOWN	Right	N	0	0	CIT233	GSE39582	CRC_AFFY
GSM972190	C1	68	>65yr	Male	T3	N0	M0	Stage II	NA	0	108	0	108	MSS	CIMP.Neg	CMS2	Left	Y	0	0	CIT234	GSE39582	CRC_AFFY
GSM972191	C1	49	<=65yr	Male	T3	N1	M0	Stage III	NA	0	122	0	122	MSS	CIMP.Low	CMS3	Left	Y	1	0	CIT235	GSE39582	CRC_AFFY
GSM972192	C2	72	>65yr	Female	T3	N0	M0	Stage II	NA	0	158	0	158	MSS	CIMP.Neg	CMS4	Right	N	1	0	CIT236	GSE39582	CRC_AFFY
GSM972193	C2	51	<=65yr	Female	T3	N1	M0	Stage III	NA	0	73	0	73	MSS	CIMP.Low	UNKNOWN	Left	Y	1	0	CIT237	GSE39582	CRC_AFFY
GSM972194	C1	43	<=65yr	Male	T3	N1	M0	Stage III	NA	0	83	0	83	MSS	CIMP.Neg	CMS2	Left	Y	0	0	CIT238	GSE39582	CRC_AFFY
GSM972195	C4	54	<=65yr	Female	T3	N0	M0	Stage II	NA	0	120	0	120	MSS	CIMP.Neg	UNKNOWN	Right	Y	1	0	CIT239	GSE39582	CRC_AFFY
GSM972196	C4	69	>65yr	Female	T3	N0	M0	Stage II	NA	0	73	0	73	MSS	CIMP.High	CMS1	Right	N	1	0	CIT240	GSE39582	CRC_AFFY
GSM972197	C1	78	>65yr	Female	T3	N0	M0	Stage II	NA	0	50	0	50	MSS	CIMP.High	CMS3	Right	N	0	1	CIT241	GSE39582	CRC_AFFY
GSM972198	C1	52	<=65yr	Female	T3	N1	M0	Stage III	NA	0	57	0	57	MSS	CIMP.Neg	CMS2	Left	Y	1	0	CIT242	GSE39582	CRC_AFFY
GSM972199	C1	73	>65yr	Male	T3	N1	M0	Stage III	NA	0	66	0	66	MSS	CIMP.Neg	UNKNOWN	Left	Y	0	0	CIT243	GSE39582	CRC_AFFY
GSM972200	C4	61	<=65yr	Male	T3	N0	M0	Stage II	NA	0	54	0	54	MSS	CIMP.Neg	CMS2	Left	N	0	0	CIT244	GSE39582	CRC_AFFY
GSM972201	C2	78	>65yr	Male	T3	N1	M0	Stage III	NA	0	67	0	67	MSS	CIMP.Neg	CMS4	Right	Y	0	0	CIT245	GSE39582	CRC_AFFY
GSM972202	C1	57	<=65yr	Female	T3	N1	M0	Stage III	NA	0	53	0	53	MSS	CIMP.Low	CMS2	Left	Y	0	0	CIT246	GSE39582	CRC_AFFY
GSM972203	C4	66	>65yr	Female	T3	N1	M0	Stage III	NA	0	54	0	54	MSS	NA	CMS2	Left	Y	0	0	CIT247	GSE39582	CRC_AFFY
GSM972204	C4	78	>65yr	Male	NA	NA	NA	Stage II	NA	1	4	0	44	MSS	CIMP.Low	CMS4	Left	Y	0	0	CIT248	GSE39582	CRC_AFFY
GSM972205	C4	76	>65yr	Male	NA	NA	NA	Stage II	NA	1	7	1	35	MSS	CIMP.Neg	UNKNOWN	Left	N	0	0	CIT249	GSE39582	CRC_AFFY
GSM972206	C3	74	>65yr	Male	NA	NA	NA	Stage II	NA	1	0	0	42	MSS	CIMP.Low	CMS4	Left	N	1	0	CIT250	GSE39582	CRC_AFFY
GSM972207	C3	65	<=65yr	Male	T3	N1	M0	Stage III	NA	1	34	0	82	MSS	CIMP.Neg	CMS4	Left	Y	0	0	CIT251	GSE39582	CRC_AFFY
GSM972208	C2	63	<=65yr	Male	T4	N1	M1	Stage IV	NA	1	0	1	25	MSS	CIMP.Neg	CMS4	Left	NA	0	0	CIT252	GSE39582	CRC_AFFY
GSM972209	C4	54	<=65yr	Male	T3	N1	M1	Stage IV	NA	1	0	1	13	MSS	CIMP.High	CMS1	Right	NA	0	1	CIT253	GSE39582	CRC_AFFY
GSM972210	C3	50	<=65yr	Male	T3	NA	M1	Stage IV	NA	1	0	1	46	MSS	CIMP.Neg	CMS4	Left	NA	0	0	CIT254	GSE39582	CRC_AFFY
GSM972211	C3	65	<=65yr	Male	T3	N1	M0	Stage III	NA	0	57	0	57	MSS	CIMP.Neg	CMS2	Left	Y	0	0	CIT255	GSE39582	CRC_AFFY
GSM972212	C4	54	<=65yr	Female	T3	N1	M1	Stage IV	NA	1	0	1	18	MSS	CIMP.Low	CMS3	Left	NA	1	0	CIT256	GSE39582	CRC_AFFY
GSM972213	C3	71	>65yr	Female	T3	N0	M1	Stage IV	NA	1	0	1	1	MSS	CIMP.Low	CMS4	Left	NA	1	0	CIT257	GSE39582	CRC_AFFY
GSM972214	C1	88	>65yr	Female	T3	N1	M1	Stage IV	NA	1	0	1	2	MSS	CIMP.High	CMS1	Right	NA	0	1	CIT258	GSE39582	CRC_AFFY
GSM972215	C4	73	>65yr	Female	T4	N1	M0	Stage III	NA	0	47	0	47	MSS	CIMP.High	CMS4	Right	Y	1	0	CIT259	GSE39582	CRC_AFFY
GSM972216	C4	45	<=65yr	Female	T3	N1	M1	Stage IV	NA	1	0	0	94	MSS	CIMP.Neg	CMS2	Left	NA	0	0	CIT260	GSE39582	CRC_AFFY
GSM972217	C1	73	>65yr	Male	T3	N1	M1	Stage IV	NA	1	0	0	70	MSS	CIMP.Neg	CMS4	Left	NA	1	0	CIT261	GSE39582	CRC_AFFY
GSM972218	C1	75	>65yr	Female	T4	N1	M1	Stage IV	NA	1	0	1	7	MSS	CIMP.Neg	CMS3	Right	NA	1	0	CIT262	GSE39582	CRC_AFFY
GSM972219	C3	60	<=65yr	Male	T3	N1	M1	Stage IV	NA	1	0	0	53	MSS	CIMP.Low	CMS2	Left	NA	1	0	CIT263	GSE39582	CRC_AFFY
GSM972220	C4	81	>65yr	Male	T3	N1	M0	Stage III	NA	0	1	0	1	MSI	CIMP.High	CMS1	Right	N	0	1	CIT264	GSE39582	CRC_AFFY
GSM972221	C1	75	>65yr	Female	T3	N0	M0	Stage II	NA	0	65	0	65	MSI	CIMP.High	CMS3	Right	N	0	1	CIT265	GSE39582	CRC_AFFY
GSM972222	C1	69	>65yr	Female	T3	N0	M0	Stage II	NA	0	57	0	57	MSI	CIMP.Neg	UNKNOWN	Right	N	0	0	CIT266	GSE39582	CRC_AFFY
GSM972223	C1	78	>65yr	Male	T3	N0	M0	Stage II	NA	0	33	1	33	MSI	CIMP.High	CMS1	Right	N	0	1	CIT267	GSE39582	CRC_AFFY
GSM972224	C2	74	>65yr	Male	T4	N1	M0	Stage III	NA	1	20	1	25	MSI	NA	CMS1	Right	Y	NA	NA	CIT268	GSE39582	CRC_AFFY
GSM972225	C1	51	<=65yr	Male	T3	N0	M0	Stage II	NA	0	37	0	37	MSS	CIMP.High	UNKNOWN	Left	Y	0	0	CIT269	GSE39582	CRC_AFFY
GSM972226	C1	57	<=65yr	Male	T4	N0	M0	Stage II	NA	0	20	0	20	MSI	CIMP.High	CMS3	Right	N	1	0	CIT270	GSE39582	CRC_AFFY
GSM972227	C1	61	<=65yr	Male	T3	N1	M1	Stage IV	NA	0	20	1	20	MSS	CIMP.Low	CMS3	Right	Y	1	0	CIT271	GSE39582	CRC_AFFY
GSM972228	C1	68	>65yr	Male	T3	N0	M0	Stage II	NA	0	1	0	1	MSS	CIMP.High	CMS3	Right	N	0	1	CIT272	GSE39582	CRC_AFFY
GSM972229	C4	81	>65yr	Female	T3	N0	M0	Stage II	NA	0	0	0	0	MSI	CIMP.Low	CMS3	Left	N	1	0	CIT273	GSE39582	CRC_AFFY
GSM972230	C1	55	<=65yr	Male	T3	N1	M0	Stage III	NA	0	27	0	27	MSS	CIMP.Neg	CMS2	Left	Y	0	0	CIT274	GSE39582	CRC_AFFY
GSM972231	C3	54	<=65yr	Male	T3	N1	M1	Stage IV	NA	0	14	0	14	MSS	CIMP.Neg	CMS4	Left	Y	0	0	CIT275	GSE39582	CRC_AFFY
GSM972232	C2	69	>65yr	Male	T4	N1	M1	Stage IV	NA	0	21	0	21	MSS	CIMP.Low	CMS4	Left	Y	1	0	CIT276	GSE39582	CRC_AFFY
GSM972233	C1	67	>65yr	Male	T3	N0	M0	Stage II	NA	0	15	0	15	MSS	CIMP.Neg	UNKNOWN	Left	N	0	0	CIT277	GSE39582	CRC_AFFY
GSM972234	C3	79	>65yr	Male	T3	N1	M1	Stage IV	NA	0	10	1	10	MSS	CIMP.Neg	CMS4	Right	Y	0	0	CIT278	GSE39582	CRC_AFFY
GSM972235	C1	57	<=65yr	Female	T2	N1	M0	Stage III	NA	0	7	0	7	MSS	CIMP.Neg	UNKNOWN	Left	Y	1	0	CIT279	GSE39582	CRC_AFFY
GSM972236	C1	71	>65yr	Male	T1	N0	M1	Stage IV	NA	0	12	0	12	MSS	CIMP.Neg	CMS2	Left	Y	0	0	CIT280	GSE39582	CRC_AFFY
GSM972237	C1	55	<=65yr	Female	T1	N0	M0	Stage I	NA	0	25	0	25	MSS	CIMP.Neg	UNKNOWN	Left	N	0	0	CIT281	GSE39582	CRC_AFFY
GSM972238	C1	53	<=65yr	Female	T2	N1	M0	Stage III	NA	0	19	0	19	MSS	CIMP.Low	CMS2	Left	Y	0	0	CIT282	GSE39582	CRC_AFFY
GSM972239	C1	59	<=65yr	Male	T3	N0	M0	Stage II	NA	0	14	0	14	MSS	CIMP.Low	UNKNOWN	Left	N	0	0	CIT283	GSE39582	CRC_AFFY
GSM972240	C2	67	>65yr	Female	T3	N1	M1	Stage IV	NA	0	14	0	14	MSS	CIMP.Low	CMS4	Left	Y	0	0	CIT284	GSE39582	CRC_AFFY
GSM972241	C1	61	<=65yr	Male	T3	N0	M0	Stage II	NA	0	17	1	17	MSI	CIMP.Neg	UNKNOWN	Left	N	0	0	CIT285	GSE39582	CRC_AFFY
GSM972242	C4	69	>65yr	Male	T2	N0	M0	Stage I	NA	0	17	0	17	MSS	CIMP.Low	CMS3	Right	N	1	0	CIT286	GSE39582	CRC_AFFY
GSM972243	C4	66	>65yr	Male	T3	N0	M0	Stage II	NA	0	2	0	2	MSS	CIMP.Low	CMS2	Left	N	1	0	CIT287	GSE39582	CRC_AFFY
GSM972244	C2	51	<=65yr	Female	T1	N0	M0	Stage I	NA	0	14	0	14	MSS	CIMP.Neg	UNKNOWN	Left	N	0	0	CIT288	GSE39582	CRC_AFFY
GSM972245	C1	77	>65yr	Male	T4	N1	M1	Stage IV	NA	0	0	1	0	MSS	CIMP.Low	UNKNOWN	Left	N	1	0	CIT289	GSE39582	CRC_AFFY
GSM972246	C1	92	>65yr	Female	T3	N1	M0	Stage III	NA	0	0	0	0	MSS	CIMP.Neg	UNKNOWN	Left	N	0	0	CIT290	GSE39582	CRC_AFFY
GSM972247	C1	79	>65yr	Male	T4	N0	M0	Stage II	NA	0	6	0	6	MSS	CIMP.Neg	CMS2	Left	N	0	0	CIT291	GSE39582	CRC_AFFY
GSM972248	C1	58	<=65yr	Male	T3	N0	M0	Stage II	NA	0	14	0	14	MSS	CIMP.High	CMS2	Right	N	NA	NA	CIT292	GSE39582	CRC_AFFY
GSM972249	C1	74	>65yr	Female	T1	N0	M0	Stage I	NA	0	14	0	14	MSS	CIMP.High	CMS2	Right	N	1	0	CIT293	GSE39582	CRC_AFFY
GSM972250	C1	52	<=65yr	Male	T3	N1	M0	Stage III	NA	0	12	0	12	MSS	CIMP.Neg	CMS2	Left	Y	1	0	CIT294	GSE39582	CRC_AFFY
GSM972251	C3	57	<=65yr	Male	T4	N1	M1	Stage IV	NA	0	7	1	7	MSS	CIMP.Neg	CMS4	Left	Y	1	0	CIT295	GSE39582	CRC_AFFY
GSM972252	C1	37	<=65yr	Female	T3	N1	M1	Stage IV	NA	0	16	0	16	MSS	CIMP.Low	UNKNOWN	Right	Y	1	0	CIT296	GSE39582	CRC_AFFY
GSM972253	C1	56	<=65yr	Female	T3	N1	M1	Stage IV	NA	0	16	0	16	MSS	CIMP.Neg	CMS2	Right	Y	0	0	CIT297	GSE39582	CRC_AFFY
GSM972254	C2	77	>65yr	Female	T3	N0	M1	Stage IV	NA	1	9	0	14	MSS	CIMP.Neg	CMS4	Left	Y	0	0	CIT298	GSE39582	CRC_AFFY
GSM972255	C3	81	>65yr	Female	T3	N0	M0	Stage II	NA	0	5	0	5	MSS	CIMP.Neg	CMS4	Right	N	0	0	CIT299	GSE39582	CRC_AFFY
GSM972256	C1	63	<=65yr	Female	T4	N1	M1	Stage IV	NA	1	13	0	19	MSS	CIMP.Neg	CMS2	Left	Y	0	0	CIT300	GSE39582	CRC_AFFY
GSM972257	C1	88	>65yr	Female	T4	N0	M0	Stage II	NA	1	9	1	21	MSS	CIMP.Neg	UNKNOWN	Left	N	1	0	CIT301	GSE39582	CRC_AFFY
GSM972258	C1	77	>65yr	Female	T4	N0	M0	Stage II	NA	0	0	1	0	MSS	CIMP.Neg	CMS2	Left	N	0	0	CIT302	GSE39582	CRC_AFFY
GSM972259	C2	72	>65yr	Female	T4	N0	M0	Stage II	NA	0	29	0	29	MSS	CIMP.Low	CMS3	Left	Y	1	0	CIT303	GSE39582	CRC_AFFY
GSM972260	C1	70	>65yr	Male	T3	N1	M1	Stage IV	NA	0	13	0	13	MSS	CIMP.Low	CMS2	Left	Y	1	0	CIT304	GSE39582	CRC_AFFY
GSM972261	C1	79	>65yr	Female	T4	N1	M0	Stage III	NA	0	7	1	7	MSI	CIMP.High	CMS1	Right	N	0	1	CIT305	GSE39582	CRC_AFFY
GSM972262	C3	88	>65yr	Female	T4	N0	NA	Stage II	NA	0	5	0	5	MSI	CIMP.High	CMS4	Left	NA	0	1	CIT306	GSE39582	CRC_AFFY
GSM972263	C4	32	<=65yr	Male	T2	N1	M0	Stage III	NA	0	76	0	76	MSI	CIMP.High	UNKNOWN	Left	Y	0	0	CIT307	GSE39582	CRC_AFFY
GSM972264	C4	46	<=65yr	Male	T3	N0	M0	Stage II	NA	0	73	0	73	MSI	CIMP.Low	UNKNOWN	Right	N	0	0	CIT308	GSE39582	CRC_AFFY
GSM972265	C1	78	>65yr	Female	T3	N1	M0	Stage III	NA	0	60	0	60	MSI	CIMP.High	CMS1	Right	Y	0	1	CIT309	GSE39582	CRC_AFFY
GSM972266	C1	56	<=65yr	Male	T4	N1	M1	Stage IV	NA	0	20	1	20	MSI	CIMP.Neg	UNKNOWN	Left	Y	0	0	CIT310	GSE39582	CRC_AFFY
GSM972267	C1	82	>65yr	Male	T3	N0	M0	Stage II	NA	0	67	1	67	MSS	CIMP.Low	CMS2	Left	N	0	0	CIT311	GSE39582	CRC_AFFY
GSM972268	C1	67	>65yr	Male	T2	N1	M0	Stage III	NA	0	48	0	48	MSS	CIMP.Neg	CMS3	Left	Y	1	0	CIT312	GSE39582	CRC_AFFY
GSM972269	C2	70	>65yr	Male	T2	N0	M0	Stage I	NA	0	79	0	79	MSS	CIMP.Low	UNKNOWN	Right	N	1	0	CIT313	GSE39582	CRC_AFFY
GSM972270	C4	75	>65yr	Female	T4	N0	M0	Stage II	NA	0	65	0	65	MSI	CIMP.High	CMS3	Right	N	0	1	CIT314	GSE39582	CRC_AFFY
GSM972271	C1	92	>65yr	Male	T4	N1	M0	Stage III	NA	1	13	1	14	MSS	CIMP.Low	UNKNOWN	Right	N	1	0	CIT315	GSE39582	CRC_AFFY
GSM972272	C1	47	<=65yr	Female	T3	N1	M1	Stage IV	NA	0	15	1	15	MSS	CIMP.High	UNKNOWN	Right	Y	1	0	CIT316	GSE39582	CRC_AFFY
GSM972273	C1	84	>65yr	Male	NA	N0	M0	Stage I	NA	0	16	1	16	MSS	CIMP.Low	CMS3	Left	N	1	0	CIT317	GSE39582	CRC_AFFY
GSM972274	C4	91	>65yr	Female	T4	N1	M0	Stage III	NA	0	57	0	57	MSI	CIMP.High	CMS1	Right	N	0	1	CIT318	GSE39582	CRC_AFFY
GSM972275	C4	76	>65yr	Male	T4	N0	M0	Stage II	NA	1	3	1	4	MSI	CIMP.High	CMS1	Right	N	0	1	CIT319	GSE39582	CRC_AFFY
GSM972276	C4	59	<=65yr	Male	T3	N1	M0	Stage III	NA	0	43	0	43	MSI	CIMP.Low	CMS1	Right	Y	1	0	CIT320	GSE39582	CRC_AFFY
GSM972277	C1	88	>65yr	Female	T4	N0	M0	Stage II	NA	0	51	0	51	MSI	CIMP.High	CMS1	Right	N	0	1	CIT321	GSE39582	CRC_AFFY
GSM972278	C4	72	>65yr	Female	T2	N0	M0	Stage I	NA	0	45	0	45	MSI	CIMP.High	CMS1	Right	N	0	1	CIT322	GSE39582	CRC_AFFY
GSM972279	C3	67	>65yr	Female	T3	N1	M0	Stage III	NA	0	52	0	52	MSI	CIMP.High	CMS1	Right	Y	0	1	CIT323	GSE39582	CRC_AFFY
GSM972280	C1	79	>65yr	Female	T4	N0	M0	Stage II	NA	0	46	1	46	MSI	CIMP.High	CMS1	Right	N	1	0	CIT324	GSE39582	CRC_AFFY
GSM972281	C1	64	<=65yr	Male	T1	N0	M0	Stage I	NA	0	56	0	56	MSS	CIMP.Low	CMS2	Left	N	0	0	CIT325	GSE39582	CRC_AFFY
GSM972282	C1	79	>65yr	Female	T2	N0	M0	Stage I	NA	0	51	0	51	MSI	CIMP.Low	UNKNOWN	Left	N	1	0	CIT326	GSE39582	CRC_AFFY
GSM972283	C4	65	<=65yr	Male	T3	N0	M0	Stage II	NA	0	51	0	51	MSI	CIMP.High	CMS1	Right	N	0	0	CIT327	GSE39582	CRC_AFFY
GSM972284	C1	63	<=65yr	Female	T4	N1	M1	Stage IV	NA	0	27	1	27	MSS	CIMP.Neg	UNKNOWN	Left	Y	1	0	CIT328	GSE39582	CRC_AFFY
GSM972285	C3	71	>65yr	Male	T2	N0	M0	Stage I	NA	0	2	1	2	MSI	CIMP.High	UNKNOWN	Left	N	0	0	CIT329	GSE39582	CRC_AFFY
GSM972286	C1	24	<=65yr	Male	T3	N0	M0	Stage II	NA	0	37	0	37	MSI	CIMP.High	CMS1	Right	N	1	0	CIT330	GSE39582	CRC_AFFY
GSM972287	C3	77	>65yr	Male	T3	N0	M0	Stage II	NA	0	43	0	43	MSI	CIMP.High	CMS1	Right	N	0	0	CIT331	GSE39582	CRC_AFFY
GSM972288	C1	53	<=65yr	Male	T4	N1	M1	Stage IV	NA	0	35	1	35	MSS	CIMP.Neg	CMS2	Left	Y	0	0	CIT332	GSE39582	CRC_AFFY
GSM972289	C1	72	>65yr	Male	T4	N1	M1	Stage IV	NA	0	17	1	17	MSS	CIMP.Neg	CMS2	Right	Y	1	0	CIT333	GSE39582	CRC_AFFY
GSM972290	C4	70	>65yr	Female	T2	N0	M0	Stage I	NA	0	39	0	39	MSI	CIMP.Neg	CMS4	Left	N	0	0	CIT334	GSE39582	CRC_AFFY
GSM972291	C1	46	<=65yr	Male	T4	N1	M0	Stage III	NA	1	10	0	32	MSI	CIMP.Low	UNKNOWN	Left	Y	1	0	CIT335	GSE39582	CRC_AFFY
GSM972292	C1	62	<=65yr	Female	T3	N0	M0	Stage II	NA	0	25	0	25	MSI	NA	CMS1	Right	N	0	1	CIT336	GSE39582	CRC_AFFY
GSM972293	C3	NA	NA	Male	T2	N0	M0	Stage I	NA	0	50	0	50	MSS	CIMP.Low	CMS1	Right	N	1	0	CIT337	GSE39582	CRC_AFFY
GSM972294	C4	74	>65yr	Male	T3	N0	M0	Stage II	NA	0	25	0	25	MSI	NA	CMS1	Left	N	0	1	CIT338	GSE39582	CRC_AFFY
GSM972295	C1	68	>65yr	Male	T4	N1	M0	Stage III	NA	0	61	0	61	MSS	CIMP.Low	UNKNOWN	Right	Y	1	0	CIT339	GSE39582	CRC_AFFY
GSM972296	C4	77	>65yr	Female	NA	N0	M0	Stage I	NA	0	22	0	22	MSI	NA	CMS3	Left	N	1	0	CIT340	GSE39582	CRC_AFFY
GSM972297	C3	77	>65yr	Male	T1	N0	M0	Stage I	NA	0	46	1	46	MSS	CIMP.High	CMS4	Right	N	1	0	CIT341	GSE39582	CRC_AFFY
GSM972298	C1	83	>65yr	Female	T3	N0	M0	Stage II	NA	0	9	0	9	MSI	NA	CMS1	Right	N	NA	NA	CIT342	GSE39582	CRC_AFFY
GSM972299	C1	54	<=65yr	Female	T4	N1	M1	Stage IV	NA	0	41	1	41	MSS	CIMP.Neg	CMS2	Left	Y	0	0	CIT343	GSE39582	CRC_AFFY
GSM972300	C1	75	>65yr	Male	NA	N0	M0	Stage I	NA	0	41	0	41	MSS	CIMP.Low	CMS3	Right	N	1	0	CIT344	GSE39582	CRC_AFFY
GSM972301	C2	74	>65yr	Male	T3	N1	M0	Stage III	NA	0	105	1	105	MSS	CIMP.Neg	CMS3	Left	N	0	0	CIT345	GSE39582	CRC_AFFY
GSM972302	C1	79	>65yr	Male	T4	N1	M0	Stage III	NA	0	27	1	27	MSS	CIMP.Neg	CMS3	Right	N	1	0	CIT346	GSE39582	CRC_AFFY
GSM972303	C1	80	>65yr	Female	T2	N0	M0	Stage I	NA	0	19	0	19	MSS	CIMP.Neg	CMS2	Left	N	0	0	CIT347	GSE39582	CRC_AFFY
GSM972304	C1	60	<=65yr	Female	T3	N0	M0	Stage II	NA	0	30	0	30	MSS	CIMP.Low	CMS3	Left	Y	1	0	CIT348	GSE39582	CRC_AFFY
GSM972305	C2	82	>65yr	Female	T4	N1	M0	Stage III	NA	0	31	0	31	MSI	CIMP.High	CMS3	Right	N	0	1	CIT349	GSE39582	CRC_AFFY
GSM972306	C1	70	>65yr	Male	T3	N0	M0	Stage II	NA	0	56	0	56	MSS	CIMP.Neg	CMS2	Left	Y	0	0	CIT350	GSE39582	CRC_AFFY
GSM972307	C4	71	>65yr	Female	T3	N0	M0	Stage II	NA	0	82	0	82	MSS	CIMP.Neg	CMS2	Right	Y	0	0	CIT351	GSE39582	CRC_AFFY
GSM972308	C4	79	>65yr	Female	T3	N1	M0	Stage III	NA	0	92	0	92	MSS	CIMP.High	UNKNOWN	Right	N	0	0	CIT352	GSE39582	CRC_AFFY
GSM972309	C1	78	>65yr	Male	T3	N0	M0	Stage II	NA	0	95	0	95	MSS	CIMP.Low	CMS2	Right	Y	0	0	CIT353	GSE39582	CRC_AFFY
GSM972310	C1	80	>65yr	Female	T3	N1	M0	Stage III	NA	0	25	0	25	MSS	CIMP.Neg	CMS3	Right	N	1	0	CIT354	GSE39582	CRC_AFFY
GSM972311	C1	55	<=65yr	Male	T3	N0	M0	Stage II	NA	0	106	0	106	MSS	CIMP.High	UNKNOWN	Left	Y	0	0	CIT355	GSE39582	CRC_AFFY
GSM972312	C1	71	>65yr	Male	T3	N0	M0	Stage II	NA	0	97	1	97	MSS	CIMP.Low	CMS2	Left	N	0	0	CIT356	GSE39582	CRC_AFFY
GSM972313	C1	83	>65yr	Female	T2	N0	M0	Stage I	NA	0	91	1	91	MSS	CIMP.Low	UNKNOWN	Left	N	0	0	CIT357	GSE39582	CRC_AFFY
GSM972314	C4	86	>65yr	Female	T3	N1	M0	Stage III	NA	0	46	0	46	MSI	CIMP.High	CMS1	Right	N	0	1	CIT358	GSE39582	CRC_AFFY
GSM972315	C4	60	<=65yr	Female	T1	N0	M0	Stage I	NA	0	84	0	84	MSS	CIMP.Low	CMS3	Left	N	1	0	CIT359	GSE39582	CRC_AFFY
GSM972316	C1	77	>65yr	Female	T3	N0	M0	Stage II	NA	0	83	0	83	MSI	CIMP.High	CMS1	Right	N	0	1	CIT360	GSE39582	CRC_AFFY
GSM972317	C4	85	>65yr	Male	T3	N0	M0	Stage II	NA	1	5	1	30	MSI	CIMP.High	CMS1	Right	N	0	1	CIT361	GSE39582	CRC_AFFY
GSM972318	C1	84	>65yr	Female	T3	N0	M0	Stage II	NA	0	36	1	36	MSS	CIMP.Low	CMS2	Right	N	1	0	CIT362	GSE39582	CRC_AFFY
GSM972319	C1	71	>65yr	Female	T3	N0	M0	Stage II	NA	0	78	1	78	MSS	CIMP.Low	CMS2	Left	Y	1	0	CIT363	GSE39582	CRC_AFFY
GSM972320	C1	64	<=65yr	Male	T2	N1	M0	Stage III	NA	1	10	1	58	MSS	CIMP.Neg	CMS2	Left	N	1	0	CIT364	GSE39582	CRC_AFFY
GSM972321	C1	52	<=65yr	Male	T3	N1	M0	Stage III	NA	0	9	0	9	MSS	CIMP.Neg	CMS2	Left	N	0	0	CIT365	GSE39582	CRC_AFFY
GSM972322	C4	46	<=65yr	Male	T3	N0	M0	Stage II	NA	1	66	1	86	MSS	CIMP.Low	CMS2	Left	Y	1	0	CIT366	GSE39582	CRC_AFFY
GSM972323	C1	67	>65yr	Female	T3	N1	M0	Stage III	NA	0	80	0	80	MSS	CIMP.Low	CMS2	Left	Y	0	0	CIT367	GSE39582	CRC_AFFY
GSM972324	C1	72	>65yr	Male	T3	N0	M0	Stage II	NA	0	82	0	82	MSS	CIMP.Low	CMS2	Left	N	1	0	CIT368	GSE39582	CRC_AFFY
GSM972325	C4	55	<=65yr	Male	T3	N1	M0	Stage III	NA	1	53	0	71	MSS	CIMP.High	CMS1	Right	N	1	0	CIT369	GSE39582	CRC_AFFY
GSM972326	C2	71	>65yr	Female	T3	N0	M0	Stage II	NA	0	85	0	85	MSS	CIMP.Neg	CMS3	Left	Y	1	0	CIT370	GSE39582	CRC_AFFY
GSM972327	C2	60	<=65yr	Male	T3	N0	M0	Stage II	NA	0	83	0	83	MSS	CIMP.Neg	CMS3	Right	N	0	0	CIT371	GSE39582	CRC_AFFY
GSM972328	C1	74	>65yr	Male	T3	N1	M0	Stage III	NA	1	78	0	82	MSS	CIMP.Neg	CMS2	Left	Y	0	0	CIT372	GSE39582	CRC_AFFY
GSM972329	C2	61	<=65yr	Male	T3	N0	M0	Stage II	NA	0	78	0	78	MSS	CIMP.Neg	CMS3	Left	N	0	0	CIT373	GSE39582	CRC_AFFY
GSM972330	C4	79	>65yr	Female	T3	N0	M0	Stage II	NA	0	86	0	86	MSI	CIMP.Neg	CMS1	Right	N	1	0	CIT374	GSE39582	CRC_AFFY
GSM972331	C1	79	>65yr	Male	T3	N0	M0	Stage II	NA	0	75	1	75	MSS	CIMP.Neg	CMS2	Left	N	0	0	CIT375	GSE39582	CRC_AFFY
GSM972332	C1	72	>65yr	Female	T3	N0	M0	Stage II	NA	0	87	0	87	MSI	CIMP.High	CMS1	Left	N	0	1	CIT376	GSE39582	CRC_AFFY
GSM972333	C1	49	<=65yr	Male	T3	N0	M0	Stage II	NA	0	80	0	80	MSS	CIMP.Neg	CMS2	Left	Y	0	0	CIT377	GSE39582	CRC_AFFY
GSM972334	C4	79	>65yr	Female	T3	N1	M0	Stage III	NA	0	77	0	77	MSI	CIMP.High	CMS1	Right	Y	0	1	CIT378	GSE39582	CRC_AFFY
GSM972335	C1	73	>65yr	Male	T2	N0	M0	Stage I	NA	0	46	1	46	MSS	CIMP.Neg	CMS2	Left	N	0	0	CIT379	GSE39582	CRC_AFFY
GSM972336	C1	63	<=65yr	Male	T3	N1	M0	Stage III	NA	0	50	0	50	MSS	CIMP.Neg	CMS2	Left	Y	0	0	CIT380	GSE39582	CRC_AFFY
GSM972337	C4	80	>65yr	Female	T3	N1	M0	Stage III	NA	0	41	1	41	MSI	CIMP.High	CMS1	Right	N	0	1	CIT381	GSE39582	CRC_AFFY
GSM972338	C1	69	>65yr	Male	T3	N0	M0	Stage II	NA	0	74	0	74	MSS	CIMP.Neg	CMS2	Left	Y	0	0	CIT382	GSE39582	CRC_AFFY
GSM972339	C1	67	>65yr	Male	T3	N1	M0	Stage III	NA	0	76	0	76	MSS	CIMP.Neg	CMS2	Right	Y	1	0	CIT383	GSE39582	CRC_AFFY
GSM972340	C1	75	>65yr	Male	T3	N0	M0	Stage II	NA	1	48	0	84	MSS	CIMP.Low	CMS2	Left	N	0	0	CIT384	GSE39582	CRC_AFFY
GSM972341	C4	89	>65yr	Female	T3	N1	M0	Stage III	NA	0	69	0	69	MSS	CIMP.Low	UNKNOWN	Left	N	0	0	CIT385	GSE39582	CRC_AFFY
GSM972342	C4	78	>65yr	Male	T2	N0	M0	Stage I	NA	0	28	0	28	MSS	CIMP.Neg	CMS2	Left	N	0	0	CIT386	GSE39582	CRC_AFFY
GSM972343	C4	86	>65yr	Male	T3	N0	M0	Stage II	NA	0	52	1	52	MSS	CIMP.Neg	UNKNOWN	Right	N	1	0	CIT387	GSE39582	CRC_AFFY
GSM972344	C1	70	>65yr	Female	T3	N0	M0	Stage II	NA	0	75	0	75	MSS	CIMP.Neg	UNKNOWN	Left	N	0	0	CIT388	GSE39582	CRC_AFFY
GSM972345	C3	83	>65yr	Male	T3	N1	M0	Stage III	NA	1	41	1	42	MSS	CIMP.Low	CMS4	Right	N	1	0	CIT389	GSE39582	CRC_AFFY
GSM972346	C1	82	>65yr	Female	T3	N1	M0	Stage III	NA	0	72	1	72	MSI	CIMP.High	CMS1	Left	N	0	1	CIT390	GSE39582	CRC_AFFY
GSM972347	C1	73	>65yr	Female	T3	N0	M0	Stage II	NA	0	7	0	7	MSS	CIMP.Low	CMS2	Left	N	0	0	CIT391	GSE39582	CRC_AFFY
GSM972348	C1	60	<=65yr	Male	T3	N0	M0	Stage II	NA	0	62	0	62	MSS	CIMP.Low	UNKNOWN	Left	Y	1	0	CIT392	GSE39582	CRC_AFFY
GSM972349	C3	79	>65yr	Female	T4	N1	M0	Stage III	NA	0	5	1	5	MSS	CIMP.Neg	CMS4	Right	Y	1	0	CIT393	GSE39582	CRC_AFFY
GSM972350	C1	84	>65yr	Female	T3	N1	M0	Stage III	NA	NA	9	1	9	MSS	CIMP.Low	CMS3	Left	N	0	0	CIT394	GSE39582	CRC_AFFY
GSM972351	C1	71	>65yr	Male	T4	N0	M0	Stage II	NA	0	24	0	24	NA	CIMP.Low	CMS2	Left	N	0	0	CIT395	GSE39582	CRC_AFFY
GSM972352	C3	66	>65yr	Male	T3	N1	M0	Stage III	NA	1	74	0	139	MSS	CIMP.Neg	CMS4	Left	Y	0	0	CIT396	GSE39582	CRC_AFFY
GSM972353	C4	46	<=65yr	Female	T4	N0	M0	Stage II	NA	0	133	0	133	MSI	CIMP.Neg	CMS1	Right	Y	1	0	CIT397	GSE39582	CRC_AFFY
GSM972354	C4	68	>65yr	Female	T3	N1	M0	Stage III	NA	1	23	1	95	MSS	CIMP.Neg	CMS1	Right	N	0	0	CIT398	GSE39582	CRC_AFFY
GSM972355	C3	72	>65yr	Male	T3	N0	M0	Stage II	NA	1	17	1	34	MSS	CIMP.Low	CMS4	Left	Y	1	0	CIT399	GSE39582	CRC_AFFY
GSM972356	C4	73	>65yr	Female	T3	N0	M0	Stage II	NA	NA	53	1	53	MSS	CIMP.Low	CMS2	Left	N	0	0	CIT400	GSE39582	CRC_AFFY
GSM972357	C2	88	>65yr	Female	T3	N0	M0	Stage II	NA	0	42	1	42	MSS	CIMP.Neg	CMS3	Left	N	0	0	CIT401	GSE39582	CRC_AFFY
GSM972358	C4	53	<=65yr	Female	T3	N0	M0	Stage II	NA	0	81	0	81	MSS	CIMP.Neg	CMS2	Left	Y	0	0	CIT402	GSE39582	CRC_AFFY
GSM972359	C2	56	<=65yr	Female	T3	N0	M0	Stage II	NA	1	12	1	30	MSS	CIMP.Neg	CMS4	Right	Y	0	0	CIT403	GSE39582	CRC_AFFY
GSM972360	C4	54	<=65yr	Female	T3	N1	M0	Stage III	NA	0	141	0	141	MSS	CIMP.Neg	UNKNOWN	Left	Y	0	0	CIT404	GSE39582	CRC_AFFY
GSM972361	C4	72	>65yr	Female	T4	N1	M0	Stage III	NA	1	18	1	19	MSS	CIMP.High	CMS4	Left	Y	1	0	CIT405	GSE39582	CRC_AFFY
GSM972362	C1	50	<=65yr	Male	T3	N1	M0	Stage III	NA	0	98	0	98	MSS	CIMP.Neg	CMS2	Right	Y	1	0	CIT406	GSE39582	CRC_AFFY
GSM972363	C4	68	>65yr	Female	T3	N1	M0	Stage III	NA	0	140	0	140	MSS	CIMP.Low	CMS2	Left	Y	1	0	CIT407	GSE39582	CRC_AFFY
GSM972364	C1	71	>65yr	Female	T3	N1	M0	Stage III	NA	0	103	0	103	MSS	CIMP.High	CMS3	Right	Y	1	0	CIT408	GSE39582	CRC_AFFY
GSM972365	C2	59	<=65yr	Female	T3	N1	M0	Stage III	NA	0	47	0	47	MSS	CIMP.High	CMS4	Right	Y	1	0	CIT409	GSE39582	CRC_AFFY
GSM972366	C2	50	<=65yr	Male	T3	N1	M0	Stage III	NA	1	14	1	24	MSS	CIMP.Neg	CMS4	Right	Y	1	0	CIT410	GSE39582	CRC_AFFY
GSM972367	C3	72	>65yr	Male	T3	N1	M0	Stage III	NA	0	95	0	95	MSS	CIMP.Low	CMS4	Left	Y	1	0	CIT411	GSE39582	CRC_AFFY
GSM972368	C1	70	>65yr	Female	T3	N1	M0	Stage III	NA	0	92	0	92	MSS	CIMP.Low	CMS2	Left	Y	0	0	CIT412	GSE39582	CRC_AFFY
GSM972369	C3	58	<=65yr	Male	T3	N1	M0	Stage III	NA	1	18	1	102	MSS	CIMP.Neg	CMS4	Left	Y	0	0	CIT413	GSE39582	CRC_AFFY
GSM972370	C2	73	>65yr	Female	T3	N1	M0	Stage III	NA	1	32	1	71	MSS	CIMP.Low	CMS2	Left	Y	0	0	CIT414	GSE39582	CRC_AFFY
GSM972371	C1	47	<=65yr	Male	T3	N1	M0	Stage III	NA	0	81	0	81	MSS	CIMP.Neg	CMS2	Right	Y	0	0	CIT415	GSE39582	CRC_AFFY
GSM972372	C1	59	<=65yr	Male	T4	N1	M0	Stage III	NA	1	33	1	50	MSS	CIMP.Low	CMS2	Right	Y	1	0	CIT416	GSE39582	CRC_AFFY
GSM972373	C1	66	>65yr	Male	T3	N1	M0	Stage III	NA	1	37	0	79	MSS	CIMP.Neg	CMS2	Right	Y	0	0	CIT417	GSE39582	CRC_AFFY
GSM972374	C4	65	<=65yr	Male	T1	N1	M0	Stage III	NA	0	90	0	90	MSS	CIMP.Low	CMS2	Left	Y	0	0	CIT418	GSE39582	CRC_AFFY
GSM972375	C3	46	<=65yr	Female	T3	N1	M0	Stage III	NA	0	117	0	117	MSS	CIMP.High	CMS4	Right	Y	1	0	CIT419	GSE39582	CRC_AFFY
GSM972376	C3	73	>65yr	Female	T3	N1	M0	Stage III	NA	0	87	0	87	MSS	CIMP.Low	CMS4	Left	Y	0	0	CIT420	GSE39582	CRC_AFFY
GSM972377	C2	59	<=65yr	Female	T3	N1	M0	Stage III	NA	0	82	0	82	MSS	CIMP.Neg	CMS4	Left	Y	0	0	CIT421	GSE39582	CRC_AFFY
GSM972378	C3	78	>65yr	Male	T3	N1	M0	Stage III	NA	0	86	0	86	MSS	CIMP.Neg	CMS4	Right	Y	0	0	CIT422	GSE39582	CRC_AFFY
GSM972379	C2	63	<=65yr	Female	T2	N1	M0	Stage III	NA	0	95	0	95	MSS	CIMP.Neg	CMS3	Left	Y	1	0	CIT423	GSE39582	CRC_AFFY
GSM972380	C3	64	<=65yr	Female	T3	N1	M0	Stage III	NA	1	6	1	15	MSS	CIMP.Low	CMS4	Right	Y	1	0	CIT424	GSE39582	CRC_AFFY
GSM972381	C3	63	<=65yr	Male	T3	N0	M0	Stage II	NA	1	27	1	48	MSS	CIMP.Low	CMS2	Left	Y	0	0	CIT425	GSE39582	CRC_AFFY
GSM972382	C1	58	<=65yr	Male	T3	N0	M0	Stage II	NA	1	37	1	38	MSS	CIMP.Neg	CMS2	Right	N	1	0	CIT426	GSE39582	CRC_AFFY
GSM972383	C1	70	>65yr	Female	T3	N0	M0	Stage II	NA	0	92	0	92	MSS	CIMP.Low	CMS2	Left	N	0	0	CIT427	GSE39582	CRC_AFFY
GSM972384	C3	61	<=65yr	Male	T3	N0	M0	Stage II	NA	0	106	1	106	MSS	CIMP.Neg	CMS4	Left	N	0	0	CIT428	GSE39582	CRC_AFFY
GSM972385	C2	70	>65yr	Male	T3	N0	M0	Stage II	NA	0	63	0	63	MSS	CIMP.Low	CMS4	Left	N	0	0	CIT429	GSE39582	CRC_AFFY
GSM972386	C1	77	>65yr	Female	T3	N0	M0	Stage II	NA	0	90	0	90	MSS	CIMP.Low	CMS2	Right	N	1	0	CIT430	GSE39582	CRC_AFFY
GSM972387	C1	62	<=65yr	Male	T3	N0	M0	Stage II	NA	1	24	0	123	MSS	CIMP.Neg	CMS2	Left	N	0	0	CIT431	GSE39582	CRC_AFFY
GSM972388	C1	75	>65yr	Female	T3	N0	M0	Stage II	NA	0	83	1	83	MSS	CIMP.Low	CMS2	Left	N	0	0	CIT432	GSE39582	CRC_AFFY
GSM972389	C4	77	>65yr	Male	T4	N0	M0	Stage II	NA	0	93	0	93	MSS	CIMP.Low	CMS3	Right	N	1	0	CIT433	GSE39582	CRC_AFFY
GSM972390	C2	87	>65yr	Male	T3	N1	M0	Stage III	NA	1	6	1	8	MSI	CIMP.Neg	CMS3	Right	N	1	0	CIT434	GSE39582	CRC_AFFY
GSM972391	C4	68	>65yr	Male	T3	N0	M0	Stage II	NA	1	43	1	52	MSI	CIMP.High	CMS1	Right	N	0	1	CIT435	GSE39582	CRC_AFFY
GSM972392	C4	75	>65yr	Female	T4	N0	M0	Stage II	NA	1	21	1	44	MSS	CIMP.Low	CMS2	Right	N	1	0	CIT436	GSE39582	CRC_AFFY
GSM972393	C2	76	>65yr	Male	T3	N0	M0	Stage II	NA	1	5	1	47	MSS	CIMP.Neg	CMS2	Right	N	1	0	CIT437	GSE39582	CRC_AFFY
GSM972394	C2	81	>65yr	Male	T3	N1	M0	Stage III	NA	1	6	1	11	MSS	CIMP.Neg	CMS4	Left	N	1	0	CIT438	GSE39582	CRC_AFFY
GSM972395	C2	64	<=65yr	Male	T4	N1	M0	Stage III	NA	0	147	0	147	MSS	CIMP.Neg	CMS2	Left	Y	0	0	CIT439	GSE39582	CRC_AFFY
GSM972396	C1	72	>65yr	Male	T3	N0	M0	Stage II	NA	0	107	0	107	MSS	CIMP.Neg	CMS3	Right	N	0	0	CIT440	GSE39582	CRC_AFFY
GSM972397	C4	83	>65yr	Female	T3	N0	M0	Stage II	NA	0	105	0	105	MSS	CIMP.Neg	UNKNOWN	Left	N	1	0	CIT441	GSE39582	CRC_AFFY
GSM972398	C4	65	<=65yr	Male	T3	N0	M0	Stage II	NA	0	64	1	64	MSS	CIMP.Neg	UNKNOWN	Left	N	0	0	CIT442	GSE39582	CRC_AFFY
GSM972399	C1	54	<=65yr	Female	T4	N1	M0	Stage III	NA	0	90	0	90	MSS	NA	CMS2	Left	N	0	0	CIT443	GSE39582	CRC_AFFY
GSM972400	C3	67	>65yr	Female	T4	N1	M1	Stage IV	NA	1	8	1	11	MSS	CIMP.Low	CMS3	Left	Y	1	0	CIT444	GSE39582	CRC_AFFY
GSM972401	C2	69	>65yr	Male	T3	N0	M0	Stage II	NA	0	0	1	0	MSS	CIMP.High	CMS4	Right	N	1	0	CIT445	GSE39582	CRC_AFFY
GSM972402	C3	71	>65yr	Male	T3	N0	M1	Stage IV	NA	1	0	1	31	NA	CIMP.Low	CMS4	Right	Y	1	0	CIT446	GSE39582	CRC_AFFY
GSM972403	C1	70	>65yr	Female	T3	N0	M0	Stage II	NA	0	56	0	56	NA	CIMP.Neg	CMS1	Right	N	1	0	CIT447	GSE39582	CRC_AFFY
GSM972404	C3	68	>65yr	Male	T3	N0	M0	Stage II	NA	0	48	0	48	NA	CIMP.Low	CMS2	Left	N	0	0	CIT448	GSE39582	CRC_AFFY
GSM972405	C3	70	>65yr	Female	T4	N0	M0	Stage II	NA	0	79	1	79	NA	CIMP.Low	CMS4	Left	N	0	0	CIT449	GSE39582	CRC_AFFY
GSM972406	C4	66	>65yr	Female	T3	N0	M0	Stage II	NA	0	106	0	106	NA	CIMP.Neg	CMS1	Left	N	0	0	CIT450	GSE39582	CRC_AFFY
GSM972407	C3	42	<=65yr	Female	T4	N0	M0	Stage II	NA	0	132	0	132	NA	CIMP.Neg	CMS4	Left	Y	0	0	CIT451	GSE39582	CRC_AFFY
GSM972408	C3	66	>65yr	Male	T3	N0	M0	Stage II	NA	0	32	1	32	NA	CIMP.Neg	CMS1	Left	Y	0	0	CIT452	GSE39582	CRC_AFFY
GSM972409	C2	72	>65yr	Female	T4	N0	M0	Stage II	NA	0	104	0	104	NA	CIMP.Neg	CMS4	Left	N	0	0	CIT453	GSE39582	CRC_AFFY
GSM972410	C2	68	>65yr	Female	T3	N0	M0	Stage II	NA	0	91	0	91	NA	CIMP.Neg	CMS4	Left	N	0	0	CIT454	GSE39582	CRC_AFFY
GSM972411	C1	48	<=65yr	Female	T1	N1	M0	Stage III	NA	0	125	0	125	MSS	NA	CMS2	Left	Y	1	NA	CIT455	GSE39582	CRC_AFFY
GSM972412	C2	78	>65yr	Male	T3	N1	M0	Stage III	NA	1	5	1	8	MSS	NA	CMS4	Right	Y	0	NA	CIT456	GSE39582	CRC_AFFY
GSM972413	C3	66	>65yr	Male	T3	N1	M0	Stage III	NA	1	16	1	20	MSS	NA	CMS4	Left	Y	0	0	CIT457	GSE39582	CRC_AFFY
GSM972414	C1	52	<=65yr	Female	T3	N0	M0	Stage II	NA	0	53	0	53	MSS	CIMP.Low	CMS2	Left	N	0	0	CIT458	GSE39582	CRC_AFFY
GSM972415	C1	69	>65yr	Male	T3	N1	M0	Stage III	NA	1	8	1	42	MSS	NA	CMS2	Left	Y	1	NA	CIT459	GSE39582	CRC_AFFY
GSM972416	C3	49	<=65yr	Male	T4	N0	M0	Stage II	NA	1	5	1	8	MSS	CIMP.Low	CMS4	Left	Y	1	0	CIT460	GSE39582	CRC_AFFY
GSM972417	C3	59	<=65yr	Male	T3	N0	M0	Stage II	NA	0	146	0	146	MSS	CIMP.Neg	CMS4	Left	Y	0	0	CIT461	GSE39582	CRC_AFFY
GSM972418	C1	64	<=65yr	Male	T3	N0	M0	Stage II	NA	0	70	0	70	MSS	CIMP.Neg	CMS2	Left	N	0	0	CIT462	GSE39582	CRC_AFFY
GSM972419	C3	85	>65yr	Female	T3	N1	M0	Stage III	NA	1	30	1	32	MSS	CIMP.Neg	CMS4	Left	N	0	0	CIT463	GSE39582	CRC_AFFY
GSM972420	C2	83	>65yr	Male	T3	N1	M0	Stage III	NA	1	6	1	6	MSS	CIMP.High	CMS1	Right	N	0	1	CIT464	GSE39582	CRC_AFFY
GSM972421	C3	66	>65yr	Male	NA	NA	NA	Stage III	NA	1	22	0	28	MSS	CIMP.Neg	CMS4	Left	N	0	0	CIT465	GSE39582	CRC_AFFY
GSM972422	C2	74	>65yr	Male	NA	NA	NA	Stage II	NA	1	13	1	37	MSS	CIMP.Low	CMS4	Right	N	1	0	CIT466	GSE39582	CRC_AFFY
GSM972423	C2	52	<=65yr	Female	NA	NA	NA	Stage II	NA	1	13	0	40	MSS	CIMP.Neg	CMS4	Left	Y	0	0	CIT467	GSE39582	CRC_AFFY
GSM972424	C3	70	>65yr	Male	T3	N0	M0	Stage II	NA	0	104	0	104	MSS	CIMP.Low	CMS2	Left	Y	0	0	CIT468	GSE39582	CRC_AFFY
GSM972425	C3	72	>65yr	Female	T3	N1	M0	Stage III	NA	0	59	0	59	MSS	CIMP.Low	CMS4	Right	Y	1	0	CIT469	GSE39582	CRC_AFFY
GSM972426	C2	49	<=65yr	Male	T3	N0	M0	Stage II	NA	0	81	0	81	MSS	CIMP.Neg	CMS4	Right	Y	0	0	CIT470	GSE39582	CRC_AFFY
GSM972427	C3	63	<=65yr	Male	T3	N0	M0	Stage II	NA	0	53	0	53	MSS	CIMP.Neg	CMS4	Left	N	0	0	CIT471	GSE39582	CRC_AFFY
GSM972428	C3	62	<=65yr	Male	T3	N1	M0	Stage III	NA	0	55	0	55	MSS	CIMP.Low	CMS4	Left	Y	0	0	CIT472	GSE39582	CRC_AFFY
GSM972429	C2	64	<=65yr	Male	T4	N1	M0	Stage III	NA	0	62	0	62	MSS	CIMP.Low	CMS3	Left	Y	1	0	CIT473	GSE39582	CRC_AFFY
GSM972430	C2	43	<=65yr	Female	T3	N0	M0	Stage II	NA	0	53	0	53	MSS	CIMP.High	CMS1	Right	Y	0	0	CIT474	GSE39582	CRC_AFFY
GSM972431	C2	59	<=65yr	Male	T3	N1	M0	Stage III	NA	0	54	0	54	MSS	CIMP.Neg	CMS4	Right	Y	1	0	CIT475	GSE39582	CRC_AFFY
GSM972432	C3	71	>65yr	Male	NA	NA	NA	Stage III	NA	1	19	0	55	MSS	CIMP.Low	CMS4	Left	Y	1	0	CIT476	GSE39582	CRC_AFFY
GSM972433	C2	85	>65yr	Male	NA	NA	NA	Stage III	NA	1	3	1	16	MSS	NA	CMS4	Left	N	0	0	CIT477	GSE39582	CRC_AFFY
GSM972434	C1	70	>65yr	Male	NA	NA	NA	Stage II	NA	1	19	1	42	MSS	NA	CMS2	Left	N	0	0	CIT478	GSE39582	CRC_AFFY
GSM972435	C3	71	>65yr	Male	NA	NA	NA	Stage III	NA	1	14	0	40	MSS	CIMP.Neg	CMS2	Left	Y	0	0	CIT479	GSE39582	CRC_AFFY
GSM972436	C3	81	>65yr	Male	NA	NA	NA	Stage II	NA	1	2	1	18	MSS	CIMP.Low	UNKNOWN	Left	N	1	0	CIT480	GSE39582	CRC_AFFY
GSM972437	C3	48	<=65yr	Female	T3	N1	M1	Stage IV	NA	1	0	1	7	MSS	CIMP.Neg	CMS4	Left	NA	0	0	CIT481	GSE39582	CRC_AFFY
GSM972438	C3	44	<=65yr	Male	T4	N1	M1	Stage IV	NA	1	0	1	30	MSS	NA	CMS4	Right	NA	0	0	CIT482	GSE39582	CRC_AFFY
GSM972439	C3	65	<=65yr	Male	T3	N1	M1	Stage IV	NA	1	0	1	2	MSS	CIMP.Neg	CMS4	Left	NA	0	0	CIT483	GSE39582	CRC_AFFY
GSM972440	C2	50	<=65yr	Male	T3	N0	M0	Stage II	NA	0	52	0	52	MSS	CIMP.Low	CMS4	Left	Y	1	0	CIT484	GSE39582	CRC_AFFY
GSM972441	C2	49	<=65yr	Female	T4	N1	M1	Stage IV	NA	1	0	0	68	MSS	CIMP.Neg	CMS4	Left	NA	0	0	CIT485	GSE39582	CRC_AFFY
GSM972442	C2	54	<=65yr	Female	T3	N1	M1	Stage IV	NA	1	0	1	6	MSS	CIMP.Low	CMS1	Left	NA	1	0	CIT486	GSE39582	CRC_AFFY
GSM972443	C1	49	<=65yr	Male	T3	N0	M0	Stage II	NA	0	48	0	48	MSI	CIMP.High	UNKNOWN	Left	N	0	0	CIT487	GSE39582	CRC_AFFY
GSM972444	C3	73	>65yr	Male	T4	N1	NA	Stage III	NA	1	5	1	14	MSI	CIMP.Neg	CMS1	Right	Y	1	0	CIT488	GSE39582	CRC_AFFY
GSM972445	C4	48	<=65yr	Male	T4	N0	M0	Stage II	NA	0	35	0	35	MSI	CIMP.Low	CMS1	Right	N	0	0	CIT489	GSE39582	CRC_AFFY
GSM972446	C1	67	>65yr	Male	T3	N1	NA	Stage III	NA	NA	NA	NA	NA	MSI	CIMP.Neg	UNKNOWN	Right	NA	1	0	CIT490	GSE39582	CRC_AFFY
GSM972447	C2	71	>65yr	Male	T3	N0	M0	Stage II	NA	0	31	0	31	MSI	CIMP.High	CMS1	Right	N	0	1	CIT491	GSE39582	CRC_AFFY
GSM972448	C1	74	>65yr	Female	T3	N0	M0	Stage II	NA	NA	NA	NA	NA	MSI	CIMP.High	CMS1	Right	N	0	1	CIT492	GSE39582	CRC_AFFY
GSM972449	C1	51	<=65yr	Female	T4	N1	M0	Stage III	NA	1	19	1	41	MSS	CIMP.Low	CMS3	Right	Y	1	0	CIT493	GSE39582	CRC_AFFY
GSM972450	C4	80	>65yr	Male	T3	N0	M0	Stage II	NA	1	19	1	47	MSS	CIMP.Neg	CMS2	Left	N	0	0	CIT494	GSE39582	CRC_AFFY
GSM972451	C1	58	<=65yr	Male	T4	N0	M0	Stage II	NA	0	97	0	97	MSS	CIMP.Low	CMS2	Left	N	0	0	CIT495	GSE39582	CRC_AFFY
GSM972452	C4	75	>65yr	Female	T3	N1	M0	Stage III	NA	0	99	0	99	NA	CIMP.High	CMS1	Right	Y	0	1	CIT496	GSE39582	CRC_AFFY
GSM972453	C1	51	<=65yr	Female	T3	N1	M0	Stage III	NA	0	100	0	100	MSS	CIMP.Neg	CMS3	Right	Y	1	0	CIT497	GSE39582	CRC_AFFY
GSM972454	C4	62	<=65yr	Male	T2	N0	M0	Stage I	NA	0	75	0	75	MSS	CIMP.Low	CMS2	Left	N	1	0	CIT498	GSE39582	CRC_AFFY
GSM972455	C3	89	>65yr	Female	T3	N1	M0	Stage III	NA	0	74	0	74	MSI	CIMP.High	CMS1	Right	N	0	1	CIT499	GSE39582	CRC_AFFY
GSM972456	C1	82	>65yr	Female	T3	N0	M0	Stage II	NA	0	0	1	0	MSS	CIMP.Neg	CMS2	Left	N	0	0	CIT500	GSE39582	CRC_AFFY
GSM972457	C1	74	>65yr	Female	T3	N1	M0	Stage III	NA	1	34	0	68	MSS	CIMP.Low	CMS3	Left	Y	1	0	CIT501	GSE39582	CRC_AFFY
GSM972458	C4	65	<=65yr	Male	T3	N0	M0	Stage II	NA	0	17	1	17	MSI	CIMP.High	CMS1	Right	N	1	0	CIT502	GSE39582	CRC_AFFY
GSM972459	C1	80	>65yr	Male	T3	N0	M0	Stage II	NA	0	12	0	12	MSS	CIMP.Low	CMS3	Right	N	0	0	CIT503	GSE39582	CRC_AFFY
GSM972460	C1	70	>65yr	Female	T3	N0	M0	Stage II	NA	0	96	0	96	MSS	CIMP.High	UNKNOWN	Left	Y	0	0	CIT504	GSE39582	CRC_AFFY
GSM972461	C1	56	<=65yr	Male	T3	N0	M0	Stage II	NA	0	96	0	96	MSS	CIMP.Neg	CMS2	Left	N	0	0	CIT505	GSE39582	CRC_AFFY
GSM972462	C1	72	>65yr	Male	T2	N0	M0	Stage I	NA	0	88	0	88	MSS	CIMP.Neg	CMS2	Left	N	1	0	CIT506	GSE39582	CRC_AFFY
GSM972463	C1	67	>65yr	Male	T4	N1	M0	Stage III	NA	NA	NA	1	2	MSS	CIMP.Low	CMS3	Right	N	1	0	CIT507	GSE39582	CRC_AFFY
GSM972464	C3	76	>65yr	Female	T2	N0	M0	Stage I	NA	0	86	0	86	MSS	CIMP.Low	CMS2	Left	N	0	0	CIT508	GSE39582	CRC_AFFY
GSM972465	C1	73	>65yr	Male	T3	N0	M0	Stage II	NA	0	84	1	84	NA	CIMP.Neg	CMS1	Right	N	0	0	CIT509	GSE39582	CRC_AFFY
GSM972466	C1	73	>65yr	Female	T3	N1	M0	Stage III	NA	0	75	0	75	MSS	CIMP.Low	UNKNOWN	Right	Y	1	0	CIT510	GSE39582	CRC_AFFY
GSM972467	C3	54	<=65yr	Male	T3	N1	M0	Stage III	NA	0	72	0	72	MSS	CIMP.Low	CMS4	Left	Y	1	0	CIT511	GSE39582	CRC_AFFY
GSM972468	C1	73	>65yr	Male	T3	N0	M0	Stage II	NA	0	24	1	24	MSS	CIMP.Neg	CMS2	Left	N	0	0	CIT512	GSE39582	CRC_AFFY
GSM972469	C1	69	>65yr	Male	T2	N0	M0	Stage I	NA	0	86	0	86	MSS	CIMP.Neg	CMS2	Left	N	1	0	CIT513	GSE39582	CRC_AFFY
GSM972470	C4	50	<=65yr	Male	T3	N0	M0	Stage II	NA	0	85	0	85	MSI	CIMP.Low	CMS1	Right	Y	0	0	CIT514	GSE39582	CRC_AFFY
GSM972471	C4	73	>65yr	Female	T2	N0	M0	Stage I	NA	NA	NA	NA	NA	MSI	CIMP.High	CMS1	Right	N	0	1	CIT515	GSE39582	CRC_AFFY
GSM972472	C1	58	<=65yr	Male	T4	N0	M0	Stage II	NA	0	80	0	80	MSS	CIMP.High	CMS3	Right	Y	0	0	CIT516	GSE39582	CRC_AFFY
GSM972473	C4	67	>65yr	Male	T3	N0	M0	Stage II	NA	1	45	0	117	MSS	CIMP.Neg	CMS3	Left	N	1	0	CIT517	GSE39582	CRC_AFFY
GSM972474	C1	49	<=65yr	Female	T3	N1	M0	Stage III	NA	1	9	0	119	MSS	CIMP.Neg	CMS3	Left	Y	0	0	CIT518	GSE39582	CRC_AFFY
GSM972475	C1	68	>65yr	Female	T3	N0	M0	Stage II	NA	0	87	0	87	MSS	CIMP.Low	CMS3	Left	N	1	0	CIT519	GSE39582	CRC_AFFY
GSM972476	C3	61	<=65yr	Male	T4	N1	M0	Stage III	NA	0	64	0	64	MSS	CIMP.Neg	CMS4	Left	Y	0	0	CIT520	GSE39582	CRC_AFFY
GSM972477	C1	75	>65yr	Male	T3	N0	M0	Stage II	NA	0	81	0	81	MSS	CIMP.Low	UNKNOWN	Right	N	1	0	CIT521	GSE39582	CRC_AFFY
GSM972478	C1	80	>65yr	Male	T3	N0	M0	Stage II	NA	0	69	0	69	MSS	CIMP.Neg	CMS2	Left	N	0	0	CIT522	GSE39582	CRC_AFFY
GSM972479	C3	79	>65yr	Male	T4	N1	M0	Stage III	NA	0	3	0	3	MSS	CIMP.Low	CMS4	Right	N	1	0	CIT523	GSE39582	CRC_AFFY
GSM972480	C1	78	>65yr	Male	T3	N0	M0	Stage II	NA	0	69	0	69	MSS	CIMP.Low	CMS3	Right	N	1	0	CIT524	GSE39582	CRC_AFFY
GSM972481	C1	67	>65yr	Male	T3	N1	M0	Stage III	NA	0	65	1	65	MSS	CIMP.Low	CMS4	Left	Y	0	0	CIT525	GSE39582	CRC_AFFY
GSM972482	C1	90	>65yr	Female	T3	N0	M0	Stage II	NA	0	42	0	42	MSS	CIMP.Low	CMS3	Right	N	1	0	CIT526	GSE39582	CRC_AFFY
GSM972483	C1	80	>65yr	Female	T3	N0	M0	Stage II	NA	1	23	1	28	MSS	CIMP.Neg	UNKNOWN	Left	N	0	0	CIT527	GSE39582	CRC_AFFY
GSM972484	C3	68	>65yr	Male	T3	N0	M0	Stage II	NA	0	76	0	76	MSS	CIMP.Neg	CMS2	Left	Y	0	0	CIT528	GSE39582	CRC_AFFY
GSM972485	C4	69	>65yr	Male	T3	N0	M0	Stage II	NA	0	75	0	75	MSS	CIMP.Low	CMS2	Right	N	1	0	CIT529	GSE39582	CRC_AFFY
GSM972486	C1	87	>65yr	Male	T3	N0	M0	Stage II	NA	0	33	0	33	MSI	CIMP.Neg	CMS2	Right	N	NA	0	CIT530	GSE39582	CRC_AFFY
GSM972487	C2	84	>65yr	Male	T3	N0	M0	Stage II	NA	0	67	0	67	NA	CIMP.Low	CMS3	Left	N	1	0	CIT531	GSE39582	CRC_AFFY
GSM972488	C4	65	<=65yr	Male	T3	N0	M0	Stage II	NA	0	49	0	49	MSS	CIMP.High	CMS3	Right	N	1	0	CIT532	GSE39582	CRC_AFFY
GSM972489	C1	77	>65yr	Female	T3	N0	M0	Stage II	NA	0	74	0	74	MSS	CIMP.Low	CMS3	Right	N	1	0	CIT533	GSE39582	CRC_AFFY
GSM972490	C1	67	>65yr	Male	T3	N0	M0	Stage II	NA	0	74	0	74	MSS	CIMP.Neg	CMS2	Left	N	0	0	CIT534	GSE39582	CRC_AFFY
GSM972491	C1	74	>65yr	Male	T3	N0	M0	Stage II	NA	0	70	0	70	MSS	CIMP.Neg	CMS2	Left	N	0	0	CIT535	GSE39582	CRC_AFFY
GSM972492	C1	69	>65yr	Male	T2	N0	M0	Stage I	NA	0	68	0	68	MSS	CIMP.High	CMS2	Right	N	0	0	CIT536	GSE39582	CRC_AFFY
GSM972493	C1	89	>65yr	Female	T3	N0	M0	Stage II	NA	0	59	0	59	MSS	CIMP.Neg	CMS2	Right	N	1	0	CIT537	GSE39582	CRC_AFFY
GSM972494	C4	43	<=65yr	Female	T2	N0	M0	Stage I	NA	0	57	0	57	MSI	CIMP.Neg	CMS1	Left	N	0	0	CIT538	GSE39582	CRC_AFFY
GSM972495	C2	69	>65yr	Female	T3	N1	M0	Stage III	NA	1	18	1	27	MSS	CIMP.Low	CMS2	Right	Y	0	0	CIT539	GSE39582	CRC_AFFY
GSM972496	C2	65	<=65yr	Female	T2	N0	M0	Stage I	NA	0	142	0	142	MSS	CIMP.Neg	CMS2	Left	N	0	0	CIT540	GSE39582	CRC_AFFY
GSM972497	C1	77	>65yr	Female	T2	N1	M0	Stage III	NA	0	1	0	1	MSS	CIMP.Neg	CMS2	Left	N	NA	0	CIT541	GSE39582	CRC_AFFY
GSM972498	C1	50	<=65yr	Female	T3	N1	M0	Stage III	NA	1	19	1	59	MSS	CIMP.Neg	CMS2	Left	N	0	0	CIT542	GSE39582	CRC_AFFY
GSM972499	C4	82	>65yr	Male	T4	N1	M0	Stage III	NA	0	72	0	72	MSI	CIMP.High	CMS1	Right	Y	0	0	CIT543	GSE39582	CRC_AFFY
GSM972500	C2	74	>65yr	Female	T3	N0	M0	Stage II	NA	NA	NA	NA	NA	NA	CIMP.Neg	CMS4	Right	N	0	0	CIT544	GSE39582	CRC_AFFY
GSM972501	C4	76	>65yr	Female	T3	N1	M0	Stage III	NA	0	106	1	106	MSS	CIMP.Neg	CMS2	Left	N	0	0	CIT545	GSE39582	CRC_AFFY
GSM972502	C1	69	>65yr	Male	T3	N0	M0	Stage II	NA	0	131	0	131	MSS	CIMP.Neg	CMS3	Left	N	0	0	CIT546	GSE39582	CRC_AFFY
GSM972503	C2	42	<=65yr	Female	T3	N0	M0	Stage II	NA	0	146	0	146	MSS	CIMP.Neg	CMS4	Left	Y	0	0	CIT547	GSE39582	CRC_AFFY
GSM972504	C2	80	>65yr	Male	T3	N1	M0	Stage III	NA	1	24	1	30	MSS	CIMP.Neg	CMS4	Left	N	1	0	CIT548	GSE39582	CRC_AFFY
GSM972505	C4	69	>65yr	Male	T3	N0	M0	Stage II	NA	0	144	0	144	MSS	CIMP.Neg	CMS2	Left	N	0	0	CIT549	GSE39582	CRC_AFFY
GSM972506	C2	68	>65yr	Male	T3	N0	M0	Stage II	NA	0	141	0	141	MSS	CIMP.Low	CMS2	Left	N	0	0	CIT550	GSE39582	CRC_AFFY
GSM972507	C4	83	>65yr	Female	T3	N1	M0	Stage III	NA	0	42	0	42	MSI	CIMP.High	CMS1	Right	N	0	1	CIT551	GSE39582	CRC_AFFY
GSM972508	C4	69	>65yr	Female	T1	N0	M0	Stage I	NA	0	134	0	134	MSS	CIMP.Neg	CMS2	Left	N	1	0	CIT552	GSE39582	CRC_AFFY
GSM972509	C1	73	>65yr	Female	T2	N0	M0	Stage I	NA	0	14	0	14	MSS	CIMP.Low	CMS2	Left	N	0	0	CIT553	GSE39582	CRC_AFFY
GSM972510	C1	89	>65yr	Male	T3	N0	M0	Stage II	NA	0	86	0	86	MSS	CIMP.Low	CMS3	Left	N	0	0	CIT554	GSE39582	CRC_AFFY
GSM972511	C1	75	>65yr	Male	T3	N1	M0	Stage III	NA	0	47	1	47	MSS	CIMP.Low	CMS2	Right	Y	0	0	CIT555	GSE39582	CRC_AFFY
GSM972512	C1	62	<=65yr	Male	T4	N1	M0	Stage III	NA	1	4	1	23	MSS	CIMP.High	CMS3	Right	Y	1	0	CIT556	GSE39582	CRC_AFFY
GSM972513	C1	85	>65yr	Male	T3	N1	M0	Stage III	NA	1	13	1	48	MSS	CIMP.Neg	CMS2	Right	N	1	0	CIT557	GSE39582	CRC_AFFY
GSM972514	C4	79	>65yr	Female	T2	N1	M0	Stage III	NA	NA	NA	1	32	MSS	CIMP.Low	CMS2	Left	Y	0	0	CIT558	GSE39582	CRC_AFFY
GSM972515	C1	72	>65yr	Female	T3	N0	M0	Stage II	NA	0	118	0	118	MSS	CIMP.Low	CMS2	Left	N	0	0	CIT559	GSE39582	CRC_AFFY
GSM972516	C1	82	>65yr	Male	T3	N0	M0	Stage II	NA	0	66	0	66	MSS	CIMP.Low	UNKNOWN	Left	N	1	0	CIT560	GSE39582	CRC_AFFY
GSM972517	C3	88	>65yr	Female	T3	N0	M0	Stage II	NA	1	32	1	37	MSS	CIMP.Neg	CMS2	Left	N	0	0	CIT561	GSE39582	CRC_AFFY
GSM972518	C2	82	>65yr	Female	T4	N1	M0	Stage III	NA	1	15	1	35	MSS	CIMP.Low	CMS4	Right	N	1	0	CIT562	GSE39582	CRC_AFFY
GSM972519	C2	58	<=65yr	Male	T3	N0	M0	Stage II	NA	1	11	1	14	MSS	CIMP.Neg	CMS4	Left	N	0	0	CIT563	GSE39582	CRC_AFFY
GSM972520	C4	76	>65yr	Male	T3	N1	M0	Stage III	NA	0	62	1	62	MSS	CIMP.Low	UNKNOWN	Left	Y	0	0	CIT564	GSE39582	CRC_AFFY
GSM972521	C2	90	>65yr	Female	T3	N0	M0	Stage II	NA	0	76	1	76	MSS	CIMP.Low	CMS4	Right	N	0	0	CIT565	GSE39582	CRC_AFFY
GSM972522	C2	53	<=65yr	Female	T3	N0	M0	Stage II	NA	0	99	0	99	MSS	CIMP.Low	CMS1	Right	Y	1	0	CIT566	GSE39582	CRC_AFFY
0065bfd9.e1b9.43a8.9379.9658ba	C1	55	<=65yr	Male	T3	N0	NA	Stage II	NA	0	23	0	23	MSS	NA	CMS3	Left	NA	1	0	20CO007	CPTAC	CRC_RNAseq
01bf1906.9bdc.41c3.89a0.b89ef6	C1	56	<=65yr	Male	T2	N0	NA	Stage I	NA	0	29	0	29	MSS	NA	UNKNOWN	Left	NA	0	1	05CO047	CPTAC	CRC_RNAseq
01d1ffca.4235.4dfe.bf62.56f71d	C2	58	<=65yr	Male	T3	N1	NA	Stage III	NA	0	31	0	31	MSS	NA	CMS3	Left	NA	0	0	11CO032	CPTAC	CRC_RNAseq
0630ecb0.b664.4e75.bb3c.fb62ee	C4	66	>65yr	Female	T3	N1	NA	Stage III	NA	1	9	1	18	MSS	NA	CMS1	Right	NA	1	0	11CO052	CPTAC	CRC_RNAseq
0aef1fe8.ca61.4113.81d0.d82ee7	C4	74	>65yr	Female	T3	N0	NA	Stage II	NA	0	NA	1	11	MSI	NA	CMS1	Right	NA	0	1	05CO015	CPTAC	CRC_RNAseq
0f757044.9bc8.4ed4.90f3.e0a49a	C2	59	<=65yr	Female	T3	N0	NA	Stage II	NA	0	31	0	31	MSS	NA	CMS2	Right	NA	0	0	11CO010	CPTAC	CRC_RNAseq
1312a0e0.5025.433e.9670.0595bb	C3	64	<=65yr	Female	T3	N0	NA	Stage II	NA	0	30	0	30	MSS	NA	CMS4	Right	NA	0	0	05CO035	CPTAC	CRC_RNAseq
1425a1a1.c835.47a2.a9b9.4db5d0	C1	75	>65yr	Female	T2	N0	NA	Stage I	NA	0	20	0	20	MSS	NA	UNKNOWN	Right	NA	1	0	09CO011	CPTAC	CRC_RNAseq
1563ef63.d2e6.406f.adc1.255949	C3	52	<=65yr	Female	T3	N1	NA	Stage III	NA	0	31	0	31	MSS	NA	CMS4	Left	NA	0	0	11CO037	CPTAC	CRC_RNAseq
159c49fd.40ff.4616.b6b6.be21a6	C3	NA	NA	Female	T2	N1	NA	Stage III	NA	0	29	0	29	MSS	NA	CMS4	Left	NA	0	0	05CO002	CPTAC	CRC_RNAseq
17cd2121.d347.431c.9cc7.fbab14	C1	67	>65yr	Female	T3	N1	NA	Stage III	NA	0	25	0	25	MSI	NA	UNKNOWN	Right	NA	0	1	05CO050	CPTAC	CRC_RNAseq
1ea1d7ee.e382.4a68.8e7c.74e833	C2	67	>65yr	Male	T3	N0	NA	Stage II	NA	0	27	0	27	MSS	NA	CMS4	Right	NA	1	0	09CO014	CPTAC	CRC_RNAseq
21880d70.69eb.4f09.bea9.8de3e6	C1	62	<=65yr	Male	T2	N0	NA	Stage I	NA	NA	NA	NA	NA	MSS	NA	CMS2	Left	NA	0	0	05CO005	CPTAC	CRC_RNAseq
21c6f56a.8881.421b.81fa.c354cb	C2	72	>65yr	Male	T4	N0	NA	Stage IV	NA	1	NA	0	32	MSS	NA	CMS2	Left	NA	0	0	11CO022	CPTAC	CRC_RNAseq
21cab01c.e968.42cc.9651.1e53c0	C4	37	<=65yr	Male	T3	N1	NA	Stage III	NA	0	30	0	30	MSI	NA	CMS1	Right	NA	0	0	11CO036	CPTAC	CRC_RNAseq
2d266d2d.4bb3.436c.a3e7.06acb2	C4	60	<=65yr	Female	T4	N1	NA	Stage IV	NA	1	NA	1	26	MSI	NA	CMS4	Left	NA	0	0	20CO003	CPTAC	CRC_RNAseq
2f8b02e4.1848.4abc.a95e.dd9eb5	C2	61	<=65yr	Male	T2	N1	NA	Stage III	NA	1	13	0	28	MSS	NA	CMS4	Right	NA	1	0	05CO033	CPTAC	CRC_RNAseq
3ca0ab23.70ae.4083.bd7d.9f71d8	C3	65	<=65yr	Male	T3	N0	NA	Stage II	NA	0	32	0	32	MSS	NA	CMS4	Left	NA	0	0	11CO047	CPTAC	CRC_RNAseq
3d797911.d476.436f.9cce.33e20c	C2	74	>65yr	Male	T3	N0	NA	Stage II	NA	0	31	0	31	MSI	NA	CMS1	Right	NA	0	1	11CO018	CPTAC	CRC_RNAseq
42216d99.e8ff.43c9.b6db.28c3a6	C1	55	<=65yr	Female	T3	N1	NA	Stage III	NA	0	31	0	31	MSS	NA	CMS4	Right	NA	0	0	05CO034	CPTAC	CRC_RNAseq
43192517.085e.450e.9481.0a6713	C4	86	>65yr	Male	T2	N0	NA	Stage I	NA	0	30	0	30	MSS	NA	CMS3	Right	NA	1	0	05CO054	CPTAC	CRC_RNAseq
43e0432b.343d.4e12.817f.21281c	C2	64	<=65yr	Male	T3	N0	NA	Stage II	NA	0	32	0	32	MSS	NA	CMS4	Right	NA	0	0	11CO048	CPTAC	CRC_RNAseq
47b9deba.dea0.4e0c.8b0a.4864c3	C2	63	<=65yr	Female	T3	N0	NA	Stage II	NA	0	31	0	31	MSS	NA	CMS4	Left	NA	0	0	16CO003	CPTAC	CRC_RNAseq
4976cbf9.cad4.48ce.b234.622c70	C1	78	>65yr	Female	T4	N1	NA	Stage III	NA	0	28	0	28	MSI	NA	CMS1	Right	NA	0	1	05CO048	CPTAC	CRC_RNAseq
4b263734.430f.41dc.a296.8691f0	C3	73	>65yr	Female	T3	N1	NA	Stage III	NA	0	27	0	27	MSS	NA	CMS4	Left	NA	0	0	06CO002	CPTAC	CRC_RNAseq
4b68d71e.48b4.45ba.a041.9d6aa0	C1	71	>65yr	Male	T3	N0	NA	Stage II	NA	0	31	0	31	MSS	NA	CMS2	Left	NA	0	0	11CO042	CPTAC	CRC_RNAseq
4cdeecb5.19fb.493c.91f5.eb0efc	C3	55	<=65yr	Female	T3	N0	NA	Stage II	NA	0	31	0	31	MSS	NA	CMS4	Left	NA	0	0	11CO030	CPTAC	CRC_RNAseq
4d86cf19.8d5b.46b5.ab4c.ace0b2	C2	57	<=65yr	Female	T3	N1	NA	Stage III	NA	1	22	1	28	MSI	NA	CMS4	Right	NA	0	1	22CO006	CPTAC	CRC_RNAseq
52d61ab1.5781.4b47.8e88.37c2ea	C3	55	<=65yr	Male	T3	N1	NA	Stage III	NA	0	31	0	31	MSS	NA	CMS3	Left	NA	1	0	11CO020	CPTAC	CRC_RNAseq
5557e478.3e6f.475b.8acc.1b4159	C3	68	>65yr	Male	T3	N0	NA	Stage II	NA	1	31	0	32	MSS	NA	CMS4	Left	NA	0	0	11CO077	CPTAC	CRC_RNAseq
573048dd.2502.40e0.8e8c.c41bb8	C1	63	<=65yr	Female	T4	N1	NA	Stage III	NA	1	16	0	30	MSS	NA	CMS2	Left	NA	0	0	01CO019	CPTAC	CRC_RNAseq
58a92726.4d1f.4e44.8938.52b97d	C4	55	<=65yr	Female	T3	N0	NA	Stage II	NA	0	30	0	30	MSS	NA	CMS2	Right	NA	0	0	05CO029	CPTAC	CRC_RNAseq
591fb460.703a.437d.8d9a.ff2a35	C1	67	>65yr	Female	T3	N0	NA	Stage II	NA	0	31	0	31	MSS	NA	CMS2	Right	NA	1	0	11CO043	CPTAC	CRC_RNAseq
59891744.2db3.4541.a86a.7f911f	C1	70	>65yr	Female	T3	N0	NA	Stage II	NA	0	NA	1	44	MSS	NA	CMS2	Left	NA	0	0	01CO005	CPTAC	CRC_RNAseq
5a007558.764c.463b.a788.fdbccb	C3	50	<=65yr	Male	T3	N0	NA	Stage II	NA	0	28	0	28	MSI	NA	CMS3	Left	NA	0	0	05CO037	CPTAC	CRC_RNAseq
5a85e6e7.35ab.4ca9.ab62.707e77	C1	63	<=65yr	Male	T3	N0	NA	Stage II	NA	0	1	0	1	MSS	NA	CMS2	Left	NA	0	0	14CO002	CPTAC	CRC_RNAseq
5da00abd.5fa7.4deb.95f1.7982e0	C1	55	<=65yr	Female	T3	N0	NA	Stage II	NA	0	32	0	32	MSS	NA	CMS2	Left	NA	0	0	11CO027	CPTAC	CRC_RNAseq
5f823547.ee16.45b7.a6a0.ef25d6	C2	76	>65yr	Male	T2	N0	NA	Stage I	NA	NA	NA	0	31	MSS	NA	CMS4	Left	NA	0	0	21CO006	CPTAC	CRC_RNAseq
64b606d7.d40f.41ae.b220.a66324	C4	65	<=65yr	Female	T3	N1	NA	Stage III	NA	0	11	0	11	MSS	NA	CMS2	Left	NA	0	0	11CO072	CPTAC	CRC_RNAseq
66b829db.1cdd.460d.b2f3.0e9ca9	C1	52	<=65yr	Male	T3	N1	NA	Stage II	NA	0	30	0	30	MSS	NA	CMS3	Right	NA	1	0	05CO053	CPTAC	CRC_RNAseq
695b0b00.a86b.43c0.a6c8.50a840	C4	79	>65yr	Male	T3	N1	NA	Stage III	NA	0	28	0	28	MSI	NA	CMS1	Right	NA	0	1	05CO032	CPTAC	CRC_RNAseq
6968a80f.fd06.4669.b4bd.9a5cb5	C4	73	>65yr	Female	T3	N1	NA	Stage III	NA	NA	NA	NA	NA	MSS	NA	UNKNOWN	NA	NA	0	0	05CO014	CPTAC	CRC_RNAseq
6a9a1d66.d666.44df.a68e.ddc58d	C4	74	>65yr	Female	T2	N0	NA	Stage I	NA	NA	NA	NA	NA	MSS	NA	CMS3	Left	NA	1	0	16CO012	CPTAC	CRC_RNAseq
6f5853a3.1d47.4a54.94dc.970c1c	C1	68	>65yr	Male	T3	N1	NA	Stage III	NA	0	35	0	35	MSS	NA	CMS2	Left	NA	0	0	16CO002	CPTAC	CRC_RNAseq
722378ea.d1a7.4cfc.aca5.ba45f9	C3	74	>65yr	Female	T3	N1	NA	Stage III	NA	0	31	0	31	MSS	NA	CMS4	Right	NA	0	1	11CO019	CPTAC	CRC_RNAseq
743c74e4.cd76.4f38.8cb4.3c9107	C4	53	<=65yr	Female	T2	N1	NA	Stage III	NA	0	23	0	23	MSS	NA	UNKNOWN	Left	NA	0	0	09CO018	CPTAC	CRC_RNAseq
74f7759a.279c.4098.b080.358900	C3	53	<=65yr	Female	T4	N0	NA	Stage II	NA	0	27	0	27	MSS	NA	CMS4	Right	NA	0	0	15CO002	CPTAC	CRC_RNAseq
760f15d2.444c.4deb.b133.62f3ca	C2	61	<=65yr	Male	T4	N1	NA	Stage III	NA	0	32	0	32	MSS	NA	CMS3	Left	NA	0	0	01CO001	CPTAC	CRC_RNAseq
7782134d.02db.44ee.adfa.fc1372	C2	59	<=65yr	Male	T3	N1	NA	Stage III	NA	0	35	0	35	MSS	NA	CMS4	Right	NA	0	0	16CO011	CPTAC	CRC_RNAseq
77c493b1.34ba.4efc.8def.987116	C1	75	>65yr	Female	T3	N1	NA	Stage III	NA	0	31	0	31	MSS	NA	CMS2	Left	NA	0	0	11CO079	CPTAC	CRC_RNAseq
799893aa.d523.4a08.9ea7.611cca	C4	64	<=65yr	Female	T3	N0	NA	Stage II	NA	0	31	0	31	MSI	NA	CMS1	Right	NA	0	0	11CO007	CPTAC	CRC_RNAseq
7a0266b4.b07c.41dc.8ddd.350e1b	C1	77	>65yr	Female	T2	N0	NA	Stage I	NA	0	31	0	31	MSI	NA	CMS3	Right	NA	0	1	01CO022	CPTAC	CRC_RNAseq
7cc7f69f.99f5.4b23.a9e0.ba0dc8	C3	NA	NA	Male	T3	N0	NA	Stage II	NA	0	27	0	27	MSI	NA	CMS1	Right	NA	0	0	05CO003	CPTAC	CRC_RNAseq
7e3d5ae0.3dcc.4207.8dd2.59ab4b	C2	69	>65yr	Female	T3	N1	NA	Stage IV	NA	1	NA	1	20	MSS	NA	CMS4	Right	NA	1	0	11CO044	CPTAC	CRC_RNAseq
803736b3.9ca9.4f9f.bdfe.8783e3	C3	93	>65yr	Female	T3	N0	NA	Stage II	NA	0	31	0	31	MSS	NA	CMS4	Right	NA	1	0	05CO020	CPTAC	CRC_RNAseq
8495cc54.eb88.40ab.b03f.363edf	C1	39	<=65yr	Male	T3	N0	NA	Stage II	NA	0	32	0	32	MSS	NA	CMS2	Left	NA	0	0	05CO011	CPTAC	CRC_RNAseq
87408d9e.4029.4e8f.b14c.8efc04	C1	75	>65yr	Male	T3	N1	NA	Stage III	NA	1	NA	0	7	MSS	NA	CMS2	Right	NA	0	0	06CO001	CPTAC	CRC_RNAseq
8960a27e.69d8.4ec8.a795.c6cf8a	C2	55	<=65yr	Male	T3	N0	NA	Stage II	NA	0	32	0	32	MSI	NA	CMS4	Left	NA	0	0	11CO033	CPTAC	CRC_RNAseq
8af80ae9.2088.4124.91fb.8d6c17	C3	71	>65yr	Female	T4	N0	NA	Stage II	NA	0	30	0	30	MSI	NA	CMS1	Left	NA	0	0	05CO044	CPTAC	CRC_RNAseq
8c73f3a5.fea8.4942.90c0.966f66	C4	48	<=65yr	Female	T3	N0	NA	Stage II	NA	0	32	0	32	MSI	NA	CMS1	Right	NA	0	0	11CO061	CPTAC	CRC_RNAseq
92c1ebb5.ac1d.4bf5.a14f.516e1d	C4	75	>65yr	Female	T3	N1	NA	Stage III	NA	0	29	0	29	MSS	NA	UNKNOWN	Right	NA	0	0	05CO045	CPTAC	CRC_RNAseq
9452572f.e3ec.4063.a82e.43ac90	C1	54	<=65yr	Female	T3	N0	NA	Stage II	NA	1	NA	0	31	MSS	NA	CMS3	Left	NA	1	0	01CO008	CPTAC	CRC_RNAseq
97423edb.6f19.4b41.a7cb.af1635	C3	64	<=65yr	Male	T3	N0	NA	Stage IV	NA	1	NA	0	15	MSS	NA	CMS2	Right	NA	1	0	16CO006	CPTAC	CRC_RNAseq
98742d96.cc2f.43f0.9de2.bc7afe	C3	67	>65yr	Female	T3	N1	NA	Stage III	NA	0	32	0	32	MSS	NA	CMS4	Left	NA	1	0	11CO008	CPTAC	CRC_RNAseq
9899e1ad.62e1.4cc2.91fc.49b85c	C2	85	>65yr	Female	T4	N1	NA	Stage III	NA	0	30	0	30	MSI	NA	CMS1	Left	NA	0	0	05CO007	CPTAC	CRC_RNAseq
a2f03d85.5f1a.4b3e.9dbf.74e67e	C1	52	<=65yr	Male	T3	N0	NA	Stage II	NA	0	29	0	29	MSS	NA	CMS2	Left	NA	0	0	22CO004	CPTAC	CRC_RNAseq
a467b905.fc0b.427b.8753.6d38dd	C1	50	<=65yr	Male	T4	N1	NA	Stage IV	NA	NA	NA	0	23	MSS	NA	CMS2	Left	NA	1	0	21CO007	CPTAC	CRC_RNAseq
a8955d38.7a72.4f9d.9c70.5c0f08	C1	83	>65yr	Female	T3	N1	NA	Stage III	NA	0	27	0	27	MSI	NA	CMS3	Right	NA	0	1	05CO006	CPTAC	CRC_RNAseq
aa0f5b40.3290.4255.8f4d.f45d4e	C1	54	<=65yr	Male	T3	N1	NA	Stage III	NA	0	28	0	28	MSS	NA	CMS2	Right	NA	0	0	09CO008	CPTAC	CRC_RNAseq
b2615b47.5ac2.4775.9205.50990d	C1	70	>65yr	Female	T3	N1	NA	Stage III	NA	0	26	0	26	MSS	NA	CMS2	Left	NA	1	0	05CO026	CPTAC	CRC_RNAseq
b4dd4a04.5eda.43dd.8298.215b07	C4	79	>65yr	Female	T3	N0	NA	Stage II	NA	0	30	0	30	MSI	NA	CMS1	Right	NA	0	1	05CO041	CPTAC	CRC_RNAseq
b75e68fd.cfa1.4e9e.b4c1.a57ad8	C4	41	<=65yr	Female	T2	N1	NA	Stage III	NA	NA	NA	NA	NA	MSS	NA	CMS4	Left	NA	0	0	24CO005	CPTAC	CRC_RNAseq
b873f54a.5a86.4dca.90f9.715820	C1	89	>65yr	Male	T2	N0	NA	Stage I	NA	0	31	0	31	MSS	NA	CMS2	Right	NA	0	0	01CO015	CPTAC	CRC_RNAseq
b913f361.c5c2.4e49.91ca.719bd8	C1	88	>65yr	Male	T2	N0	NA	Stage I	NA	0	17	0	17	MSS	NA	CMS2	Right	NA	1	0	09CO019	CPTAC	CRC_RNAseq
bc574f73.89ba.44d7.992e.82622c	C2	66	>65yr	Female	T3	N1	NA	Stage III	NA	0	32	0	32	MSS	NA	CMS4	Left	NA	1	0	11CO005	CPTAC	CRC_RNAseq
be2d5946.3452.4003.880a.e0372e	C4	78	>65yr	Female	T3	N1	NA	Stage III	NA	1	32	0	31	MSI	NA	CMS1	Right	NA	0	1	01CO014	CPTAC	CRC_RNAseq
c2c53076.b5db.4b7d.983c.a35740	C1	87	>65yr	Male	T2	N0	NA	Stage I	NA	NA	NA	0	3	MSS	NA	CMS2	Right	NA	1	0	09CO006	CPTAC	CRC_RNAseq
c2db7236.990c.42b6.9ffb.2ad150	C1	57	<=65yr	Female	T3	N1	NA	Stage III	NA	0	29	0	29	MSS	NA	CMS3	Left	NA	1	0	15CO001	CPTAC	CRC_RNAseq
c6ae57a7.65a0.438e.bae2.97b1c8	C4	54	<=65yr	Female	T3	N0	NA	Stage II	NA	0	32	0	32	MSI	NA	CMS1	Left	NA	0	0	11CO031	CPTAC	CRC_RNAseq
c7aeb685.31b3.445e.8177.a3e729	C3	58	<=65yr	Male	T2	N0	NA	Stage I	NA	0	13	0	13	MSS	NA	CMS2	Left	NA	0	0	01CO013	CPTAC	CRC_RNAseq
c8694e31.2c8f.4eb6.a7ef.a137d9	C4	35	<=65yr	Male	T3	N1	NA	Stage III	NA	0	31	0	31	NA	NA	CMS4	Left	NA	1	1	11CO070	CPTAC	CRC_RNAseq
c952715e.35ca.4e18.ad6f.dd4e39	C1	74	>65yr	Male	T4	N0	NA	Stage II	NA	0	NA	1	18	MSI	NA	CMS1	Right	NA	0	1	05CO039	CPTAC	CRC_RNAseq
ccaab7e8.e841.4397.80aa.370b58	C4	54	<=65yr	Female	T4	N1	NA	Stage III	NA	NA	NA	NA	NA	MSS	NA	CMS2	Left	NA	0	0	05CO055	CPTAC	CRC_RNAseq
cf795cd2.317b.4897.a35e.390001	C3	75	>65yr	Female	T3	N1	NA	Stage IV	NA	1	NA	1	8	MSS	NA	CMS4	Left	NA	1	0	11CO021	CPTAC	CRC_RNAseq
d0511ea6.43c3.4c61.b08e.cf49b7	C3	51	<=65yr	Female	T3	N1	NA	Stage III	NA	0	36	0	36	MSS	NA	CMS4	Right	NA	1	0	27CO004	CPTAC	CRC_RNAseq
d068de5f.8394.46bc.b03a.c6dc9c	C1	69	>65yr	Male	T3	N1	NA	Stage III	NA	0	30	0	30	MSS	NA	CMS2	Right	NA	0	0	09CO015	CPTAC	CRC_RNAseq
d3078fa8.0692.411f.8441.0c7c48	C3	56	<=65yr	Female	T3	N0	NA	Stage II	NA	0	33	0	33	MSS	NA	CMS4	Right	NA	1	0	11CO058	CPTAC	CRC_RNAseq
d4afb9cf.2f90.44b9.bd60.d03069	C4	83	>65yr	Female	T3	N0	NA	Stage II	NA	NA	NA	NA	NA	MSI	NA	CMS1	Right	NA	0	0	11CO059	CPTAC	CRC_RNAseq
d7608884.a0d6.4e9e.aac7.6cd813	C2	88	>65yr	Male	T3	N0	NA	Stage II	NA	0	27	0	27	MSS	NA	CMS3	Right	NA	0	0	05CO049	CPTAC	CRC_RNAseq
d8345fa1.f692.4025.bc82.bfaec6	C3	54	<=65yr	Female	T3	N1	NA	Stage III	NA	0	29	0	29	MSS	NA	CMS4	Right	NA	1	0	20CO001	CPTAC	CRC_RNAseq
db3f5ad9.d14d.4126.a3e7.d80faa	C3	75	>65yr	Female	T3	N0	NA	Stage II	NA	0	39	0	39	MSS	NA	CMS2	Right	NA	1	0	14CO005	CPTAC	CRC_RNAseq
dffcac99.9eac.4717.aeb6.f4a2e7	C1	50	<=65yr	Male	T3	N1	NA	Stage III	NA	NA	NA	0	15	MSS	NA	CMS2	Right	NA	1	0	09CO013	CPTAC	CRC_RNAseq
e0068ac5.f557.443a.bd4b.bdfcef	C4	61	<=65yr	Female	T2	N0	NA	Stage I	NA	0	27	0	27	MSS	NA	CMS3	Right	NA	1	0	05CO028	CPTAC	CRC_RNAseq
e295a7d1.a0d0.4b0b.bdc2.729a0d	C1	68	>65yr	Female	T3	N0	NA	Stage II	NA	0	32	0	32	MSS	NA	CMS2	Left	NA	0	0	11CO039	CPTAC	CRC_RNAseq
e515eb5c.8005.416a.9b42.59de9d	C3	74	>65yr	Male	T3	N1	NA	Stage III	NA	0	33	0	33	MSS	NA	CMS4	Right	NA	1	0	11CO057	CPTAC	CRC_RNAseq
e8faa3a7.9fc7.428e.9334.a0afd0	C3	75	>65yr	Male	T3	N0	NA	Stage IV	NA	0	32	0	32	MSS	NA	CMS3	Right	NA	1	0	11CO062	CPTAC	CRC_RNAseq
ec9afcc4.ccf7.4226.b0e8.d6897d	C3	69	>65yr	Female	T3	N1	NA	Stage III	NA	NA	NA	0	24	MSS	NA	CMS3	Right	NA	1	0	09CO005	CPTAC	CRC_RNAseq
ecf1ca92.c8b7.470f.baf4.81cf73	C4	64	<=65yr	Female	T3	N0	NA	Stage II	NA	0	34	0	34	MSS	NA	CMS2	Left	NA	0	0	11CO053	CPTAC	CRC_RNAseq
f0bb6ff4.7cb8.427f.84bf.7f51d7	C1	56	<=65yr	Male	T4	N1	NA	Stage III	NA	1	NA	0	29	MSS	NA	UNKNOWN	Right	NA	1	0	20CO004	CPTAC	CRC_RNAseq
f2a13f8d.b129.4567.beae.049b15	C2	61	<=65yr	Female	T3	N0	NA	Stage II	NA	0	35	0	35	MSI	NA	CMS1	Right	NA	0	1	11CO051	CPTAC	CRC_RNAseq
f4bccfe4.98d0.466b.a6d7.44341b	C3	71	>65yr	Female	T3	N1	NA	Stage III	NA	0	32	0	32	MSS	NA	CMS4	Right	NA	1	0	11CO045	CPTAC	CRC_RNAseq
f69deaeb.6b6f.4c61.8900.fd0f26	C4	72	>65yr	Female	T4	N0	NA	Stage II	NA	0	26	0	26	MSS	NA	CMS2	Right	NA	1	0	09CO022	CPTAC	CRC_RNAseq
f6a7f764.2495.4a1d.89a2.e12f51	C4	66	>65yr	Female	T3	N0	NA	Stage II	NA	0	34	0	34	MSS	NA	CMS2	Left	NA	0	0	11CO054	CPTAC	CRC_RNAseq
f9d6fb1b.988e.4d28.9272.cc672f	C2	75	>65yr	Female	T4	N1	NA	Stage III	NA	1	29	0	30	MSS	NA	CMS3	Right	NA	0	0	01CO006	CPTAC	CRC_RNAseq
fd4edc52.09ef.4b01.be7c.f23f05	C4	75	>65yr	Female	T3	N1	NA	Stage III	NA	0	42	0	42	MSI	NA	CMS1	Right	NA	0	1	14CO003	CPTAC	CRC_RNAseq
fe4b3b1c.9f7f.4109.8a76.ca1d6f	C4	72	>65yr	Female	T3	N0	NA	Stage II	NA	0	33	0	33	MSS	NA	CMS2	Left	NA	0	0	11CO060	CPTAC	CRC_RNAseq
TCGA.3L.AA1B	C3	61	<=65yr	Female	T2	N0	M0	Stage I	NA	NA	NA	0	15.61	NA	NA	CMS2	Right	NA	1	0	NA	TCGA	CRC_RNAseq
TCGA.4N.A93T	C1	67	>65yr	Male	T4	N1	M0	Stage III	NA	0	4.8	0	4.8	NA	NA	UNKNOWN	Right	Y	0	1	NA	TCGA	CRC_RNAseq
TCGA.4T.AA8H	C1	42	<=65yr	Female	T3	N0	NA	Stage II	NA	0	12.65	0	12.65	NA	NA	CMS3	Left	N	0	1	NA	TCGA	CRC_RNAseq
TCGA.5M.AAT4	C1	74	>65yr	Male	T3	N0	M1	Stage IV	NA	NA	NA	1	1.61	NA	NA	UNKNOWN	Right	N	0	1	NA	TCGA	CRC_RNAseq
TCGA.5M.AAT5	C1	NA	NA	NA	NA	NA	NA	NA	NA	NA	NA	NA	NA	NA	NA	CMS2	NA	NA	0	1	NA	TCGA	CRC_RNAseq
TCGA.5M.AAT6	C4	40	<=65yr	Female	T4	N1	M1	Stage IV	NA	1	7.19	1	9.53	NA	NA	CMS4	Right	Y	0	1	NA	TCGA	CRC_RNAseq
TCGA.5M.AATA	C1	NA	NA	NA	NA	NA	NA	NA	NA	NA	NA	NA	NA	NA	NA	UNKNOWN	NA	NA	0	0	NA	TCGA	CRC_RNAseq
TCGA.5M.AATE	C1	76	>65yr	Male	T3	N0	M0	Stage II	NA	1	26.61	0	39.42	NA	NA	CMS2	Right	N	0	1	NA	TCGA	CRC_RNAseq
TCGA.A6.2671	C3	85	>65yr	Male	T3	N1	M1	Stage IV	NA	1	39.91	1	43.73	MSS	CIMP.Neg	CMS4	Left	NA	0	0	NA	TCGA	CRC_RNAseq
TCGA.A6.2672	C4	82	>65yr	Female	T3	N1	M0	Stage III	NA	0	46.62	0	46.62	MSI	CIMP.High	CMS1	NA	NA	NA	NA	NA	TCGA	CRC_RNAseq
TCGA.A6.2674	C3	71	>65yr	Male	T3	N1	M1	Stage IV	NA	1	40.05	0	43.73	MSS	CIMP.Neg	CMS4	Left	NA	0	1	NA	TCGA	CRC_RNAseq
TCGA.A6.2675	C2	78	>65yr	Male	T3	N0	NA	Stage II	NA	0	43.4	0	43.4	MSS	CIMP.Neg	CMS4	Left	NA	0	0	NA	TCGA	CRC_RNAseq
TCGA.A6.2676	C4	75	>65yr	Female	T4	N0	M0	Stage II	NA	NA	NA	1	42.87	MSI	CIMP.High	CMS1	Right	NA	NA	NA	NA	TCGA	CRC_RNAseq
TCGA.A6.2677	C1	68	>65yr	Female	T3	N1	M0	Stage III	NA	NA	NA	1	24.31	MSS	CIMP.Neg	CMS2	Right	NA	0	0	NA	TCGA	CRC_RNAseq
TCGA.A6.2678	C4	43	<=65yr	Female	T3	N1	M0	Stage III	NA	0	42.25	0	42.25	MSS	CIMP.Neg	CMS3	Right	NA	0	0	NA	TCGA	CRC_RNAseq
TCGA.A6.2679	C2	73	>65yr	Female	T3	N0	NA	Stage II	NA	0	44.88	0	44.88	MSS	CIMP.Low	UNKNOWN	Right	NA	0	1	NA	TCGA	CRC_RNAseq
TCGA.A6.2680	C3	72	>65yr	Female	T3	N0	M0	Stage II	NA	0	35.09	0	35.09	MSS	CIMP.Neg	CMS2	Right	NA	0	1	NA	TCGA	CRC_RNAseq
TCGA.A6.2681	C2	73	>65yr	Female	T3	N0	M0	Stage II	NA	1	37.78	0	45.57	MSS	CIMP.Neg	CMS4	Right	NA	0	1	NA	TCGA	CRC_RNAseq
TCGA.A6.2682	C3	70	>65yr	Male	T4	N1	M1	Stage IV	NA	1	12.52	1	13.93	MSS	CIMP.Neg	CMS4	NA	NA	0	1	NA	TCGA	CRC_RNAseq
TCGA.A6.2683	C1	57	<=65yr	Female	T4	N0	M1	Stage IV	NA	1	9.86	1	16.56	MSS	NA	CMS2	Right	NA	0	0	NA	TCGA	CRC_RNAseq
TCGA.A6.2684	C3	75	>65yr	Female	T2	N0	M0	Stage I	NA	1	32.06	0	37.02	MSS	CIMP.Neg	CMS4	Right	NA	0	1	NA	TCGA	CRC_RNAseq
TCGA.A6.2685	C2	48	<=65yr	Female	T3	N0	M0	Stage II	NA	1	31.14	0	37.22	MSS	CIMP.Neg	CMS4	Left	NA	0	1	NA	TCGA	CRC_RNAseq
TCGA.A6.2686	C4	81	>65yr	Female	T3	N0	M0	Stage II	NA	NA	NA	1	36.99	NA	NA	CMS1	Right	NA	1	0	NA	TCGA	CRC_RNAseq
TCGA.A6.3807	C2	53	<=65yr	Female	T3	N1	M0	Stage III	NA	0	34.63	0	34.63	MSS	CIMP.Neg	CMS4	Left	NA	0	0	NA	TCGA	CRC_RNAseq
TCGA.A6.3808	C2	73	>65yr	Male	T3	N0	M0	Stage II	NA	0	33.31	0	33.31	MSS	CIMP.Neg	CMS4	Right	NA	0	1	NA	TCGA	CRC_RNAseq
TCGA.A6.3809	C4	71	>65yr	Female	T4	N0	M0	Stage II	NA	0	32.72	0	32.72	MSI	CIMP.High	CMS1	Right	NA	1	0	NA	TCGA	CRC_RNAseq
TCGA.A6.3810	C2	62	<=65yr	Male	T3	N0	M0	Stage II	NA	0	36.5	0	36.5	MSS	CIMP.Neg	CMS4	Left	NA	0	0	NA	TCGA	CRC_RNAseq
TCGA.A6.4105	C4	79	>65yr	Male	T3	N0	M0	Stage II	NA	1	11.96	1	14.52	MSS	CIMP.High	CMS4	Right	NA	0	1	NA	TCGA	CRC_RNAseq
TCGA.A6.4107	C2	57	<=65yr	Female	T3	N1	M0	Stage III	NA	0	32.42	0	32.42	MSS	CIMP.High	CMS3	Right	NA	0	1	NA	TCGA	CRC_RNAseq
TCGA.A6.5656	C1	74	>65yr	Male	T2	N0	M0	Stage I	NA	0	32.88	0	32.88	MSS	CIMP.Neg	CMS2	Left	NA	0	0	NA	TCGA	CRC_RNAseq
TCGA.A6.5657	C3	65	<=65yr	Male	T3	N1	M0	Stage III	NA	0	31.6	0	31.6	NA	NA	CMS4	NA	NA	0	0	NA	TCGA	CRC_RNAseq
TCGA.A6.5659	C1	82	>65yr	Male	T2	N0	M0	Stage I	NA	0	30.42	0	30.42	MSS	CIMP.High	CMS4	Right	NA	0	1	NA	TCGA	CRC_RNAseq
TCGA.A6.5660	C1	73	>65yr	Male	T3	N1	M0	Stage III	NA	0	29.17	0	29.17	MSS	CIMP.Low	CMS2	Right	NA	0	0	NA	TCGA	CRC_RNAseq
TCGA.A6.5661	C4	80	>65yr	Female	T3	N0	M0	Stage II	NA	0	33.51	0	33.51	MSI	CIMP.High	CMS1	Right	NA	1	0	NA	TCGA	CRC_RNAseq
TCGA.A6.5662	C1	46	<=65yr	Male	T3	N1	M1	Stage IV	NA	1	21.71	0	23.59	MSS	CIMP.Neg	CMS4	Left	NA	0	1	NA	TCGA	CRC_RNAseq
TCGA.A6.5664	C2	80	>65yr	Male	T4	N1	NA	Stage III	NA	1	21.12	0	22.08	MSS	CIMP.Neg	CMS4	Right	NA	0	1	NA	TCGA	CRC_RNAseq
TCGA.A6.5665	C4	84	>65yr	Female	T3	N0	M0	Stage II	NA	1	17.38	0	22.04	MSI	CIMP.High	CMS1	Right	NA	1	0	NA	TCGA	CRC_RNAseq
TCGA.A6.5666	C1	78	>65yr	Male	T4	N0	M0	Stage II	NA	1	31.87	0	32.69	MSS	CIMP.Neg	CMS2	Left	NA	0	1	NA	TCGA	CRC_RNAseq
TCGA.A6.5667	C3	40	<=65yr	Female	T3	N1	NA	Stage III	NA	0	29.14	0	29.14	MSS	CIMP.Neg	CMS4	Left	NA	0	0	NA	TCGA	CRC_RNAseq
TCGA.A6.6137	C2	55	<=65yr	Male	T3	N1	M0	Stage III	NA	0	27.07	0	27.07	MSS	CIMP.Neg	CMS2	Right	NA	0	0	NA	TCGA	CRC_RNAseq
TCGA.A6.6138	C2	61	<=65yr	Male	T2	N0	M0	Stage I	NA	0	22.5	0	22.5	MSS	CIMP.Low	CMS4	Right	NA	0	1	NA	TCGA	CRC_RNAseq
TCGA.A6.6140	C1	62	<=65yr	Male	T3	N0	M0	Stage II	NA	0	24.11	0	24.11	MSS	CIMP.Neg	CMS2	Left	NA	NA	NA	NA	TCGA	CRC_RNAseq
TCGA.A6.6141	C2	31	<=65yr	Male	T3	N0	M0	Stage II	NA	0	8.38	0	8.38	MSS	CIMP.Neg	CMS3	Right	NA	NA	NA	NA	TCGA	CRC_RNAseq
TCGA.A6.6142	C3	56	<=65yr	Female	T3	N1	M1	Stage IV	NA	1	21.48	0	25.07	MSS	CIMP.Neg	CMS4	Left	NA	0	0	NA	TCGA	CRC_RNAseq
TCGA.A6.6648	C1	56	<=65yr	Male	T3	N0	M1	Stage IV	NA	1	22.54	0	25.16	MSS	CIMP.Neg	CMS2	NA	NA	0	0	NA	TCGA	CRC_RNAseq
TCGA.A6.6649	C3	66	>65yr	Male	T3	N1	M0	Stage III	NA	0	24.15	0	24.15	MSS	CIMP.High	CMS4	NA	NA	1	0	NA	TCGA	CRC_RNAseq
TCGA.A6.6650	C1	69	>65yr	Female	T3	N0	M0	Stage II	NA	0	20.6	0	20.6	MSS	CIMP.Neg	UNKNOWN	NA	NA	0	1	NA	TCGA	CRC_RNAseq
TCGA.A6.6651	C2	55	<=65yr	Female	T3	N1	NA	Stage III	NA	0	21.75	0	21.75	MSS	CIMP.Neg	CMS4	Right	NA	0	0	NA	TCGA	CRC_RNAseq
TCGA.A6.6652	C1	59	<=65yr	Male	T3	N0	M1	Stage IV	NA	0	24.67	0	24.67	MSS	CIMP.Neg	CMS2	Left	NA	0	0	NA	TCGA	CRC_RNAseq
TCGA.A6.6653	C3	82	>65yr	Male	T2	N0	M0	Stage I	NA	0	24.38	0	24.38	MSI	CIMP.High	CMS1	Right	NA	1	1	NA	TCGA	CRC_RNAseq
TCGA.A6.6654	C2	65	<=65yr	Female	T3	N1	M0	Stage III	NA	0	23.85	0	23.85	MSS	CIMP.Neg	CMS4	Left	NA	0	1	NA	TCGA	CRC_RNAseq
TCGA.A6.6780	C4	74	>65yr	Male	T3	N0	NA	Stage II	NA	0	20.11	0	20.11	MSI	CIMP.Low	CMS1	NA	NA	0	0	NA	TCGA	CRC_RNAseq
TCGA.A6.6781	C3	43	<=65yr	Male	T4	N1	NA	Stage III	NA	0	19.65	0	19.65	MSI	CIMP.Neg	CMS4	NA	NA	0	0	NA	TCGA	CRC_RNAseq
TCGA.A6.6782	C3	82	>65yr	Male	T4	N0	NA	Stage II	NA	0	20.27	0	20.27	MSS	CIMP.Neg	CMS4	NA	NA	0	0	NA	TCGA	CRC_RNAseq
TCGA.A6.A565	C2	34	<=65yr	Female	T3	N1	NA	Stage III	NA	1	14.42	1	16.23	NA	CIMP.Neg	CMS4	Right	Y	0	0	NA	TCGA	CRC_RNAseq
TCGA.A6.A566	C2	55	<=65yr	Female	T4	N1	M0	Stage III	NA	1	8.44	1	24.9	NA	CIMP.Low	CMS4	Left	Y	0	1	NA	TCGA	CRC_RNAseq
TCGA.A6.A567	C1	56	<=65yr	Male	T3	N1	M1	Stage IV	NA	1	35.12	1	61.79	NA	CIMP.Neg	CMS4	Left	N	0	1	NA	TCGA	CRC_RNAseq
TCGA.A6.A56B	C1	57	<=65yr	Male	T3	N1	M0	Stage III	NA	1	55.12	1	56.21	NA	CIMP.Neg	CMS4	Left	Y	0	0	NA	TCGA	CRC_RNAseq
TCGA.A6.A5ZU	C2	59	<=65yr	Male	T3	N1	M0	Stage III	NA	0	9.63	0	9.63	NA	CIMP.Neg	CMS4	Right	Y	NA	NA	NA	TCGA	CRC_RNAseq
TCGA.AA.3488	C1	58	<=65yr	Male	T3	N1	M1	Stage IV	NA	NA	NA	1	5.03	MSS	CIMP.Neg	CMS2	Left	NA	0	1	NA	TCGA	CRC_RNAseq
TCGA.AA.3489	C2	75	>65yr	Male	T3	N0	M0	Stage II	NA	NA	NA	1	7.03	MSS	CIMP.Neg	CMS4	Left	NA	0	0	NA	TCGA	CRC_RNAseq
TCGA.AA.3492	C4	90	>65yr	Female	T3	N0	M0	Stage II	NA	NA	NA	1	3.02	MSI	CIMP.High	CMS1	Right	NA	1	0	NA	TCGA	CRC_RNAseq
TCGA.AA.3494	C1	55	<=65yr	Male	T3	N0	M1	Stage IV	NA	0	1.02	0	1.02	MSS	CIMP.Neg	CMS2	Left	NA	0	0	NA	TCGA	CRC_RNAseq
TCGA.AA.3495	C4	79	>65yr	Male	T2	N0	M0	Stage I	NA	0	37.02	0	37.02	MSS	CIMP.Neg	CMS2	Right	NA	0	0	NA	TCGA	CRC_RNAseq
TCGA.AA.3496	C2	83	>65yr	Female	T3	N0	M0	Stage II	NA	0	1.02	0	1.02	MSS	CIMP.Low	CMS4	Right	NA	0	0	NA	TCGA	CRC_RNAseq
TCGA.AA.3502	C1	73	>65yr	Male	T2	N0	M0	Stage I	NA	0	34.99	0	34.99	MSS	CIMP.Low	CMS3	Right	NA	0	1	NA	TCGA	CRC_RNAseq
TCGA.AA.3506	C2	77	>65yr	Male	T2	N0	M0	Stage I	NA	0	57.98	0	57.98	MSS	CIMP.Neg	CMS2	Right	NA	0	1	NA	TCGA	CRC_RNAseq
TCGA.AA.3509	C1	54	<=65yr	Female	T3	N0	M0	Stage II	NA	0	62.91	0	62.91	MSS	CIMP.Neg	CMS2	Left	NA	0	0	NA	TCGA	CRC_RNAseq
TCGA.AA.3510	C4	70	>65yr	Male	T3	N0	M0	Stage II	NA	0	63.93	0	63.93	NA	NA	UNKNOWN	Right	NA	0	0	NA	TCGA	CRC_RNAseq
TCGA.AA.3511	C3	64	<=65yr	Male	T4	N0	M0	Stage II	NA	1	1.94	0	6.96	MSS	CIMP.Neg	CMS4	Left	NA	0	1	NA	TCGA	CRC_RNAseq
TCGA.AA.3514	C3	81	>65yr	Female	T2	N0	M0	Stage I	NA	0	1.02	0	1.02	MSS	CIMP.Neg	CMS4	Right	NA	0	0	NA	TCGA	CRC_RNAseq
TCGA.AA.3516	C4	74	>65yr	Female	T3	N1	M0	Stage III	NA	NA	NA	1	13.01	MSI	CIMP.High	CMS1	Right	NA	NA	NA	NA	TCGA	CRC_RNAseq
TCGA.AA.3517	C3	60	<=65yr	Male	T3	N0	M0	Stage II	NA	1	26.97	0	38.96	MSS	CIMP.Neg	CMS2	Left	NA	0	0	NA	TCGA	CRC_RNAseq
TCGA.AA.3518	C4	81	>65yr	Female	T3	N0	M0	Stage II	NA	0	1.02	0	1.02	MSI	CIMP.High	CMS1	Right	NA	NA	NA	NA	TCGA	CRC_RNAseq
TCGA.AA.3519	C1	63	<=65yr	Male	T3	N1	M0	Stage III	NA	0	9.07	0	9.07	MSS	CIMP.Neg	CMS2	Left	NA	0	0	NA	TCGA	CRC_RNAseq
TCGA.AA.3520	C3	86	>65yr	Female	T3	N0	M0	Stage II	NA	0	24.01	0	24.01	MSS	CIMP.Neg	CMS4	Right	NA	0	0	NA	TCGA	CRC_RNAseq
TCGA.AA.3521	C3	87	>65yr	Male	T3	N0	M0	Stage II	NA	0	NA	0	NA	MSS	CIMP.Neg	CMS2	Left	NA	0	0	NA	TCGA	CRC_RNAseq
TCGA.AA.3522	C4	67	>65yr	Male	T3	N0	M0	Stage II	NA	0	37.02	0	37.02	MSS	CIMP.Low	CMS3	Right	NA	0	0	NA	TCGA	CRC_RNAseq
TCGA.AA.3524	C4	85	>65yr	Male	T3	N0	M0	Stage II	NA	0	36.01	0	36.01	MSS	CIMP.Neg	CMS2	Left	NA	0	0	NA	TCGA	CRC_RNAseq
TCGA.AA.3525	C4	90	>65yr	Male	T3	N1	M0	Stage III	NA	0	8.05	0	8.05	MSI	CIMP.High	CMS1	Right	NA	NA	NA	NA	TCGA	CRC_RNAseq
TCGA.AA.3526	C4	57	<=65yr	Male	T2	N0	M0	Stage I	NA	0	19.05	0	19.05	NA	NA	CMS2	Left	NA	0	0	NA	TCGA	CRC_RNAseq
TCGA.AA.3527	C2	90	>65yr	Female	T3	N0	M0	Stage II	NA	0	0	0	0	MSS	CIMP.Low	CMS4	Right	NA	NA	NA	NA	TCGA	CRC_RNAseq
TCGA.AA.3529	C1	78	>65yr	Female	T3	N1	M0	Stage III	NA	NA	NA	1	0	MSS	CIMP.Neg	CMS2	Left	NA	0	0	NA	TCGA	CRC_RNAseq
TCGA.AA.3530	C1	80	>65yr	Male	T2	N0	M0	Stage I	NA	0	19.05	0	19.05	MSS	CIMP.Neg	CMS2	Right	NA	0	1	NA	TCGA	CRC_RNAseq
TCGA.AA.3531	C1	75	>65yr	Female	T3	N0	M0	Stage II	NA	0	34	0	34	MSS	CIMP.Neg	CMS2	Left	NA	0	0	NA	TCGA	CRC_RNAseq
TCGA.AA.3532	C2	63	<=65yr	Male	T3	N0	M0	Stage II	NA	0	28.98	0	28.98	MSS	CIMP.Neg	CMS4	Left	NA	0	0	NA	TCGA	CRC_RNAseq
TCGA.AA.3534	C3	78	>65yr	Female	T3	N0	M0	Stage II	NA	0	28.98	0	28.98	MSS	CIMP.Neg	CMS2	Right	NA	0	0	NA	TCGA	CRC_RNAseq
TCGA.AA.3538	C3	54	<=65yr	Female	T2	N0	M0	Stage I	NA	0	25.99	0	25.99	MSS	CIMP.Neg	CMS2	Left	NA	0	0	NA	TCGA	CRC_RNAseq
TCGA.AA.3542	C1	69	>65yr	Male	T3	N1	M0	Stage III	NA	0	12.98	0	12.98	MSS	CIMP.Neg	CMS2	Left	NA	NA	NA	NA	TCGA	CRC_RNAseq
TCGA.AA.3543	C4	84	>65yr	Male	T2	N0	M0	Stage I	NA	0	0.99	0	0.99	MSI	CIMP.High	CMS1	Right	NA	NA	NA	NA	TCGA	CRC_RNAseq
TCGA.AA.3544	C4	68	>65yr	Male	T2	N0	M0	Stage I	NA	0	13.99	0	13.99	MSS	CIMP.Neg	CMS2	Left	NA	0	0	NA	TCGA	CRC_RNAseq
TCGA.AA.3548	C4	71	>65yr	Female	T3	N1	M0	Stage III	NA	0	33.97	0	33.97	MSS	CIMP.Neg	CMS3	Right	NA	0	0	NA	TCGA	CRC_RNAseq
TCGA.AA.3549	C2	69	>65yr	Male	T2	N0	M0	Stage I	NA	0	20.99	0	20.99	MSS	CIMP.Low	CMS2	Right	NA	0	0	NA	TCGA	CRC_RNAseq
TCGA.AA.3552	C2	85	>65yr	Male	T3	N1	M0	Stage III	NA	1	4.01	1	13.01	MSS	CIMP.Neg	CMS2	Right	NA	NA	NA	NA	TCGA	CRC_RNAseq
TCGA.AA.3553	C4	61	<=65yr	Female	T2	N0	M0	Stage I	NA	0	23.98	0	23.98	MSS	CIMP.Neg	CMS4	Left	NA	NA	NA	NA	TCGA	CRC_RNAseq
TCGA.AA.3554	C2	62	<=65yr	Female	T3	N0	M0	Stage II	NA	0	17.94	0	17.94	MSI	CIMP.Neg	CMS1	Right	NA	NA	NA	NA	TCGA	CRC_RNAseq
TCGA.AA.3555	C3	81	>65yr	Female	T3	N0	M0	Stage II	NA	1	2.99	0	29.93	MSS	CIMP.Low	CMS3	Right	NA	NA	NA	NA	TCGA	CRC_RNAseq
TCGA.AA.3556	C4	78	>65yr	Male	T2	N0	M0	Stage I	NA	0	23	0	23	MSS	CIMP.Low	CMS3	Left	NA	0	0	NA	TCGA	CRC_RNAseq
TCGA.AA.3560	C4	72	>65yr	Female	T3	N1	M0	Stage III	NA	0	19.97	0	19.97	MSS	CIMP.Neg	CMS3	Left	NA	0	0	NA	TCGA	CRC_RNAseq
TCGA.AA.3561	C1	72	>65yr	Male	T3	N0	M0	Stage II	NA	0	13.93	0	13.93	MSS	CIMP.Neg	UNKNOWN	Right	NA	0	0	NA	TCGA	CRC_RNAseq
TCGA.AA.3562	C3	82	>65yr	Male	T3	N1	M0	Stage III	NA	0	19.97	0	19.97	MSS	CIMP.Neg	CMS2	Left	NA	NA	NA	NA	TCGA	CRC_RNAseq
TCGA.AA.3655	C3	68	>65yr	Male	T3	N0	M0	Stage II	NA	0	60.97	0	60.97	MSS	CIMP.Neg	CMS3	Left	NA	0	1	NA	TCGA	CRC_RNAseq
TCGA.AA.3660	C1	51	<=65yr	Female	T3	N0	M0	Stage II	NA	0	78.02	0	78.02	MSS	CIMP.Low	CMS2	Left	NA	0	1	NA	TCGA	CRC_RNAseq
TCGA.AA.3662	C2	80	>65yr	Female	T4	N1	M1	Stage IV	NA	0	6.04	0	6.04	MSS	CIMP.Neg	CMS2	Left	NA	0	0	NA	TCGA	CRC_RNAseq
TCGA.AA.3663	C4	42	<=65yr	Male	T3	N0	M0	Stage II	NA	0	6.96	0	6.96	MSI	CIMP.Low	CMS3	Right	NA	0	1	NA	TCGA	CRC_RNAseq
TCGA.AA.3664	C4	74	>65yr	Female	T3	N0	M0	Stage II	NA	0	53.98	0	53.98	MSS	CIMP.High	CMS1	Right	NA	1	0	NA	TCGA	CRC_RNAseq
TCGA.AA.3666	C4	68	>65yr	Male	T3	N1	M0	Stage III	NA	NA	NA	1	2	MSS	CIMP.Neg	UNKNOWN	Right	NA	0	0	NA	TCGA	CRC_RNAseq
TCGA.AA.3667	C2	36	<=65yr	Female	T2	N0	M0	Stage I	NA	0	13.99	0	13.99	MSS	CIMP.Neg	CMS2	Left	NA	0	0	NA	TCGA	CRC_RNAseq
TCGA.AA.3672	C2	90	>65yr	Female	T3	N1	M0	Stage III	NA	0	0.92	0	0.92	MSI	CIMP.High	CMS1	Right	NA	0	1	NA	TCGA	CRC_RNAseq
TCGA.AA.3673	C3	53	<=65yr	Female	T3	N0	M0	Stage II	NA	0	50	0	50	MSS	CIMP.Low	CMS2	Right	NA	0	1	NA	TCGA	CRC_RNAseq
TCGA.AA.3675	C1	84	>65yr	Male	T3	N0	M0	Stage II	NA	0	47.01	0	47.01	NA	NA	CMS3	Right	NA	0	1	NA	TCGA	CRC_RNAseq
TCGA.AA.3678	C4	60	<=65yr	Female	T2	N1	M0	Stage III	NA	0	46.98	0	46.98	MSS	CIMP.Neg	CMS2	Left	NA	0	0	NA	TCGA	CRC_RNAseq
TCGA.AA.3679	C4	59	<=65yr	Male	T3	N1	M1	Stage IV	NA	0	15.01	0	15.01	MSS	CIMP.Neg	CMS2	Left	NA	0	0	NA	TCGA	CRC_RNAseq
TCGA.AA.3680	C2	67	>65yr	Female	T4	N1	M1	Stage IV	NA	NA	NA	1	11.01	MSS	CIMP.Low	CMS3	Right	NA	0	1	NA	TCGA	CRC_RNAseq
TCGA.AA.3681	C4	77	>65yr	Female	T3	N1	M0	Stage III	NA	0	5.98	0	5.98	MSS	CIMP.Low	CMS1	Right	NA	0	1	NA	TCGA	CRC_RNAseq
TCGA.AA.3684	C2	65	<=65yr	Female	T4	N1	M1	Stage IV	NA	0	0	0	0	MSS	CIMP.Low	CMS4	Right	NA	1	0	NA	TCGA	CRC_RNAseq
TCGA.AA.3685	C4	69	>65yr	Male	T3	N0	M0	Stage II	NA	0	37.02	0	37.02	NA	NA	CMS2	Left	NA	0	0	NA	TCGA	CRC_RNAseq
TCGA.AA.3688	C1	80	>65yr	Male	T3	N1	M1	Stage IV	NA	0	18.99	0	18.99	MSS	CIMP.Neg	CMS2	Left	NA	0	0	NA	TCGA	CRC_RNAseq
TCGA.AA.3692	C4	47	<=65yr	Female	T3	N1	M1	Stage IV	NA	1	13.01	1	35.97	MSS	CIMP.Neg	CMS3	Left	NA	0	0	NA	TCGA	CRC_RNAseq
TCGA.AA.3693	C1	77	>65yr	Female	T4	N1	M1	Stage IV	NA	0	0	0	0	MSS	CIMP.Neg	CMS2	Left	NA	0	0	NA	TCGA	CRC_RNAseq
TCGA.AA.3696	C1	75	>65yr	Female	T3	N1	M1	Stage IV	NA	NA	NA	1	5.03	MSS	CIMP.Neg	CMS2	Left	NA	0	1	NA	TCGA	CRC_RNAseq
TCGA.AA.3697	C4	77	>65yr	Male	T3	N0	M0	Stage II	NA	0	84.99	0	84.99	MSS	CIMP.Neg	CMS2	Left	NA	0	0	NA	TCGA	CRC_RNAseq
TCGA.AA.3710	C4	80	>65yr	Female	T3	N0	M0	Stage II	NA	0	26.97	0	26.97	MSI	CIMP.High	CMS1	Right	NA	NA	NA	NA	TCGA	CRC_RNAseq
TCGA.AA.3712	C3	65	<=65yr	Male	T3	N1	M0	Stage III	NA	0	0	0	0	MSS	CIMP.Neg	CMS4	Left	NA	0	0	NA	TCGA	CRC_RNAseq
TCGA.AA.3713	C4	68	>65yr	Male	T3	N0	M1	Stage IV	NA	0	19.02	0	19.02	MSI	CIMP.Low	CMS1	Right	NA	1	0	NA	TCGA	CRC_RNAseq
TCGA.AA.3715	C2	77	>65yr	Male	T3	N0	M0	Stage II	NA	1	5.03	1	19.02	MSI	CIMP.High	CMS1	Right	NA	1	1	NA	TCGA	CRC_RNAseq
TCGA.AA.3811	C4	84	>65yr	Female	T3	N1	M0	Stage III	NA	NA	NA	1	10.05	MSI	CIMP.Neg	CMS1	Right	NA	0	0	NA	TCGA	CRC_RNAseq
TCGA.AA.3812	C3	82	>65yr	Female	T3	N0	M0	Stage II	NA	1	25.03	0	35.02	MSS	CIMP.Neg	CMS4	Left	NA	0	0	NA	TCGA	CRC_RNAseq
TCGA.AA.3814	C2	85	>65yr	Female	T3	N0	M0	Stage II	NA	0	0	0	0	MSS	CIMP.Neg	CMS4	Right	NA	0	1	NA	TCGA	CRC_RNAseq
TCGA.AA.3815	C4	65	<=65yr	Female	T3	N0	M0	Stage II	NA	0	33.02	0	33.02	MSI	CIMP.High	CMS1	Right	NA	1	0	NA	TCGA	CRC_RNAseq
TCGA.AA.3818	C1	78	>65yr	Female	T3	N0	M0	Stage II	NA	NA	NA	1	0.99	MSS	CIMP.Low	CMS3	Right	NA	0	1	NA	TCGA	CRC_RNAseq
TCGA.AA.3819	C1	41	<=65yr	Female	T3	N0	M0	Stage II	NA	0	25	0	25	MSS	CIMP.Neg	CMS2	Left	NA	0	0	NA	TCGA	CRC_RNAseq
TCGA.AA.3821	C1	81	>65yr	Female	T2	N0	M0	Stage I	NA	0	1.02	0	1.02	MSI	CIMP.High	CMS1	Right	NA	1	0	NA	TCGA	CRC_RNAseq
TCGA.AA.3831	C4	66	>65yr	Male	T3	N0	M0	Stage II	NA	0	17.97	0	17.97	MSS	CIMP.Low	CMS2	Left	NA	0	0	NA	TCGA	CRC_RNAseq
TCGA.AA.3833	C2	63	<=65yr	Female	T3	N0	M0	Stage II	NA	0	15.93	0	15.93	MSI	CIMP.High	CMS1	Right	NA	1	0	NA	TCGA	CRC_RNAseq
TCGA.AA.3837	C3	67	>65yr	Male	T3	N0	M0	Stage II	NA	0	38.96	0	38.96	MSS	CIMP.High	CMS3	Right	NA	0	1	NA	TCGA	CRC_RNAseq
TCGA.AA.3841	C2	66	>65yr	Male	T3	N0	M0	Stage II	NA	0	36.93	0	36.93	MSS	NA	CMS4	Left	NA	0	1	NA	TCGA	CRC_RNAseq
TCGA.AA.3842	C3	51	<=65yr	Male	T2	N1	M0	Stage III	NA	1	13.01	0	36.99	MSS	CIMP.Low	CMS1	Left	NA	0	1	NA	TCGA	CRC_RNAseq
TCGA.AA.3844	C4	78	>65yr	Female	T3	N1	M0	Stage III	NA	1	11.99	0	14.91	MSS	CIMP.Neg	UNKNOWN	Left	NA	0	1	NA	TCGA	CRC_RNAseq
TCGA.AA.3845	C4	86	>65yr	Female	T3	N0	M0	Stage II	NA	NA	NA	1	0	MSI	CIMP.High	CMS1	Right	NA	0	1	NA	TCGA	CRC_RNAseq
TCGA.AA.3846	C4	74	>65yr	Female	T3	N0	M0	Stage II	NA	0	17.02	0	17.02	MSS	CIMP.Neg	CMS2	Left	NA	0	0	NA	TCGA	CRC_RNAseq
TCGA.AA.3848	C1	82	>65yr	Female	T3	N1	M0	Stage III	NA	NA	NA	1	10.05	MSS	CIMP.Low	CMS2	Left	NA	0	1	NA	TCGA	CRC_RNAseq
TCGA.AA.3850	C2	74	>65yr	Male	T2	N0	M0	Stage I	NA	NA	NA	1	0	MSS	CIMP.Low	CMS3	Right	NA	0	0	NA	TCGA	CRC_RNAseq
TCGA.AA.3851	C4	74	>65yr	Male	T3	N0	M0	Stage II	NA	0	33.05	0	33.05	MSS	CIMP.Neg	CMS3	Right	NA	0	1	NA	TCGA	CRC_RNAseq
TCGA.AA.3852	C2	88	>65yr	Male	T3	N0	M0	Stage II	NA	NA	NA	1	0	MSS	CIMP.Low	CMS3	Right	NA	0	1	NA	TCGA	CRC_RNAseq
TCGA.AA.3854	C2	71	>65yr	Female	T2	N0	M0	Stage I	NA	0	36.01	0	36.01	MSS	CIMP.Low	CMS3	Left	NA	0	1	NA	TCGA	CRC_RNAseq
TCGA.AA.3855	C4	72	>65yr	Male	T2	N0	M0	Stage I	NA	0	32.03	0	32.03	MSS	CIMP.Low	CMS2	Left	NA	0	0	NA	TCGA	CRC_RNAseq
TCGA.AA.3856	C4	59	<=65yr	Male	T3	N0	M0	Stage II	NA	0	0.99	0	0.99	MSS	CIMP.Neg	CMS2	Left	NA	0	0	NA	TCGA	CRC_RNAseq
TCGA.AA.3858	C3	67	>65yr	Male	T2	N0	M0	Stage I	NA	0	31.04	0	31.04	MSS	CIMP.Neg	CMS2	Left	NA	0	0	NA	TCGA	CRC_RNAseq
TCGA.AA.3860	C4	53	<=65yr	Female	T3	N1	M0	Stage III	NA	0	31.04	0	31.04	MSS	CIMP.Neg	CMS4	Left	NA	0	0	NA	TCGA	CRC_RNAseq
TCGA.AA.3861	C4	72	>65yr	Male	T3	N0	M0	Stage II	NA	0	30.03	0	30.03	MSS	CIMP.Low	CMS3	Right	NA	0	1	NA	TCGA	CRC_RNAseq
TCGA.AA.3862	C4	82	>65yr	Male	T3	N0	M0	Stage II	NA	0	30.03	0	30.03	MSS	CIMP.Neg	CMS3	Right	NA	0	1	NA	TCGA	CRC_RNAseq
TCGA.AA.3864	C4	71	>65yr	Male	T3	N0	M0	Stage II	NA	0	52.96	0	52.96	MSI	CIMP.Neg	CMS3	Right	NA	0	1	NA	TCGA	CRC_RNAseq
TCGA.AA.3866	C4	78	>65yr	Female	T2	N0	M0	Stage I	NA	0	17.02	0	17.02	MSS	CIMP.Neg	CMS4	Right	NA	0	0	NA	TCGA	CRC_RNAseq
TCGA.AA.3867	C3	74	>65yr	Male	T3	N1	M1	Stage IV	NA	1	12.94	0	24.01	MSS	CIMP.Neg	CMS4	Left	NA	0	0	NA	TCGA	CRC_RNAseq
TCGA.AA.3869	C4	76	>65yr	Male	T4	N1	M1	Stage IV	NA	NA	NA	1	27	MSS	CIMP.Neg	CMS2	Right	NA	0	0	NA	TCGA	CRC_RNAseq
TCGA.AA.3870	C2	71	>65yr	Female	T3	N1	M1	Stage IV	NA	0	29.96	0	29.96	MSS	CIMP.High	CMS4	Right	NA	0	1	NA	TCGA	CRC_RNAseq
TCGA.AA.3872	C3	45	<=65yr	Male	T4	N1	M1	Stage IV	NA	0	0	0	0	MSS	CIMP.Neg	CMS4	Left	NA	0	0	NA	TCGA	CRC_RNAseq
TCGA.AA.3875	C4	78	>65yr	Female	T1	N0	M0	Stage I	NA	0	18.04	0	18.04	MSS	CIMP.Neg	CMS2	Right	NA	0	0	NA	TCGA	CRC_RNAseq
TCGA.AA.3877	C4	83	>65yr	Female	T1	N0	M0	Stage I	NA	0	30.98	0	30.98	MSI	CIMP.High	CMS1	Right	NA	1	0	NA	TCGA	CRC_RNAseq
TCGA.AA.3930	C4	66	>65yr	Male	T3	N1	M1	Stage IV	NA	NA	NA	1	2	MSS	CIMP.Low	CMS1	Right	NA	0	1	NA	TCGA	CRC_RNAseq
TCGA.AA.3939	C2	83	>65yr	Male	T3	N0	M0	Stage II	NA	0	12.98	0	12.98	MSS	CIMP.Neg	CMS3	Right	NA	0	1	NA	TCGA	CRC_RNAseq
TCGA.AA.3941	C1	84	>65yr	Female	T4	N1	M1	Stage IV	NA	0	23.98	0	23.98	MSS	CIMP.High	CMS1	Right	NA	0	1	NA	TCGA	CRC_RNAseq
TCGA.AA.3947	C4	60	<=65yr	Female	T4	N0	M0	Stage II	NA	0	32.98	0	32.98	MSI	NA	CMS1	Right	NA	1	0	NA	TCGA	CRC_RNAseq
TCGA.AA.3949	C4	87	>65yr	Female	T3	N1	M0	Stage III	NA	0	25.99	0	25.99	MSI	CIMP.High	CMS1	Right	NA	1	0	NA	TCGA	CRC_RNAseq
TCGA.AA.3950	C4	79	>65yr	Female	T3	N0	M0	Stage II	NA	0	23.98	0	23.98	MSI	CIMP.High	CMS4	Right	NA	1	0	NA	TCGA	CRC_RNAseq
TCGA.AA.3952	C1	68	>65yr	Male	T3	N1	M0	Stage III	NA	NA	NA	1	2	MSS	CIMP.Neg	CMS4	Left	NA	0	0	NA	TCGA	CRC_RNAseq
TCGA.AA.3955	C1	38	<=65yr	Male	T2	N1	M0	Stage III	NA	0	20.96	0	20.96	MSS	CIMP.Neg	CMS2	Left	NA	0	0	NA	TCGA	CRC_RNAseq
TCGA.AA.3956	C2	65	<=65yr	Male	T3	N0	M0	Stage II	NA	0	34	0	34	MSS	CIMP.Neg	CMS2	Right	NA	0	0	NA	TCGA	CRC_RNAseq
TCGA.AA.3966	C2	89	>65yr	Female	T3	N0	M0	Stage II	NA	0	2	0	2	MSI	CIMP.Low	CMS1	Right	NA	1	0	NA	TCGA	CRC_RNAseq
TCGA.AA.3968	C3	55	<=65yr	Female	T2	N0	M0	Stage I	NA	0	21.98	0	21.98	MSS	CIMP.Neg	CMS4	Left	NA	0	0	NA	TCGA	CRC_RNAseq
TCGA.AA.3970	C4	65	<=65yr	Male	T3	N0	M0	Stage II	NA	0	36.01	0	36.01	MSS	CIMP.Neg	CMS2	Left	NA	NA	NA	NA	TCGA	CRC_RNAseq
TCGA.AA.3971	C2	58	<=65yr	Male	T3	N1	M0	Stage III	NA	0	16.06	0	16.06	MSS	CIMP.Neg	CMS2	Left	NA	0	0	NA	TCGA	CRC_RNAseq
TCGA.AA.3972	C1	72	>65yr	Male	T3	N1	M1	Stage IV	NA	1	39.95	0	50.95	MSS	CIMP.Low	CMS2	Left	NA	0	0	NA	TCGA	CRC_RNAseq
TCGA.AA.3973	C1	69	>65yr	Male	T4	N1	M1	Stage IV	NA	0	13.04	0	13.04	MSS	CIMP.Neg	CMS4	Left	NA	0	0	NA	TCGA	CRC_RNAseq
TCGA.AA.3975	C3	80	>65yr	Male	T2	N0	M0	Stage I	NA	0	34.03	0	34.03	MSS	CIMP.Neg	CMS2	Left	NA	0	1	NA	TCGA	CRC_RNAseq
TCGA.AA.3976	C1	70	>65yr	Male	T2	N1	M0	Stage III	NA	0	25.99	0	25.99	MSS	CIMP.Neg	CMS2	Left	NA	0	0	NA	TCGA	CRC_RNAseq
TCGA.AA.3977	C4	65	<=65yr	Male	T2	N0	NA	NA	NA	0	25	0	25	MSS	CIMP.Neg	CMS3	Left	NA	0	1	NA	TCGA	CRC_RNAseq
TCGA.AA.3979	C1	84	>65yr	Male	T3	N0	M0	Stage II	NA	0	23.98	0	23.98	MSS	CIMP.Low	CMS1	Left	NA	0	1	NA	TCGA	CRC_RNAseq
TCGA.AA.3980	C4	89	>65yr	Female	T2	N0	M0	Stage I	NA	0	27	0	27	MSS	CIMP.Neg	UNKNOWN	Left	NA	0	0	NA	TCGA	CRC_RNAseq
TCGA.AA.3982	C4	75	>65yr	Male	T3	N1	M0	Stage III	NA	0	27	0	27	MSS	CIMP.Neg	UNKNOWN	Left	NA	0	0	NA	TCGA	CRC_RNAseq
TCGA.AA.3984	C4	61	<=65yr	Female	T3	N0	M0	Stage II	NA	0	0	0	0	MSS	CIMP.Neg	CMS1	Left	NA	0	0	NA	TCGA	CRC_RNAseq
TCGA.AA.3986	C2	73	>65yr	Male	T2	N0	M0	Stage I	NA	0	19.05	0	19.05	MSS	CIMP.Neg	CMS2	Right	NA	0	1	NA	TCGA	CRC_RNAseq
TCGA.AA.3989	C2	84	>65yr	Male	T3	N1	M1	Stage IV	NA	NA	NA	1	7.95	MSS	CIMP.Low	CMS2	Right	NA	0	1	NA	TCGA	CRC_RNAseq
TCGA.AA.3994	C3	69	>65yr	Male	T3	N1	M0	Stage III	NA	0	27	0	27	MSS	CIMP.High	CMS3	Right	NA	0	1	NA	TCGA	CRC_RNAseq
TCGA.AA.A004	C2	76	>65yr	Male	T3	N0	M0	Stage II	NA	0	13.93	0	13.93	MSS	NA	CMS1	Left	NA	0	0	NA	TCGA	CRC_RNAseq
TCGA.AA.A00A	C4	80	>65yr	Male	T3	N0	M0	Stage II	NA	0	38.01	0	38.01	MSI	CIMP.High	CMS1	Right	NA	NA	NA	NA	TCGA	CRC_RNAseq
TCGA.AA.A00D	C4	70	>65yr	Male	T2	N0	M0	Stage I	NA	0	18.99	0	18.99	MSS	CIMP.High	CMS1	Right	NA	NA	NA	NA	TCGA	CRC_RNAseq
TCGA.AA.A00E	C4	65	<=65yr	Male	T3	N0	M0	Stage II	NA	0	29.99	0	29.99	MSI	CIMP.High	CMS1	Right	NA	NA	NA	NA	TCGA	CRC_RNAseq
TCGA.AA.A00F	C3	66	>65yr	Male	T3	N1	M0	Stage III	NA	0	34	0	34	MSS	CIMP.Neg	CMS4	Left	NA	NA	NA	NA	TCGA	CRC_RNAseq
TCGA.AA.A00J	C3	80	>65yr	Male	T4	N1	M0	Stage III	NA	0	18.04	0	18.04	MSI	CIMP.High	CMS1	Right	NA	NA	NA	NA	TCGA	CRC_RNAseq
TCGA.AA.A00K	C1	79	>65yr	Male	T3	N0	M0	Stage II	NA	0	18.04	0	18.04	MSS	CIMP.Neg	CMS3	Left	NA	NA	NA	NA	TCGA	CRC_RNAseq
TCGA.AA.A00L	C1	66	>65yr	Male	T3	N0	M0	Stage II	NA	0	38.01	0	38.01	MSS	CIMP.Neg	CMS2	Right	NA	NA	NA	NA	TCGA	CRC_RNAseq
TCGA.AA.A00N	C3	75	>65yr	Male	T4	N0	M0	Stage II	NA	NA	NA	1	4.01	MSS	CIMP.Neg	CMS4	Right	NA	0	1	NA	TCGA	CRC_RNAseq
TCGA.AA.A00O	C3	83	>65yr	Female	T3	N1	M0	Stage III	NA	0	27	0	27	MSS	CIMP.Neg	CMS4	Left	NA	0	0	NA	TCGA	CRC_RNAseq
TCGA.AA.A00Q	C1	66	>65yr	Female	T4	N1	M0	Stage III	NA	0	41.98	0	41.98	MSS	CIMP.Low	CMS2	Left	NA	NA	NA	NA	TCGA	CRC_RNAseq
TCGA.AA.A00R	C4	64	<=65yr	Female	T2	N0	M0	Stage I	NA	0	0.99	0	0.99	MSI	CIMP.Low	CMS1	Right	NA	NA	NA	NA	TCGA	CRC_RNAseq
TCGA.AA.A00U	C1	50	<=65yr	Male	T3	N1	M0	Stage III	NA	0	17.02	0	17.02	MSS	CIMP.Low	CMS3	Right	NA	NA	NA	NA	TCGA	CRC_RNAseq
TCGA.AA.A00W	C1	80	>65yr	Male	T1	N0	M0	Stage I	NA	0	14.98	0	14.98	MSS	CIMP.Neg	CMS2	Left	NA	NA	NA	NA	TCGA	CRC_RNAseq
TCGA.AA.A00Z	C1	70	>65yr	Male	T3	N0	M0	Stage II	NA	0	21.98	0	21.98	MSS	CIMP.Neg	CMS2	Left	NA	0	0	NA	TCGA	CRC_RNAseq
TCGA.AA.A010	C4	46	<=65yr	Female	T4	N0	M0	Stage II	NA	0	34.95	0	34.95	MSS	CIMP.Neg	CMS1	Right	NA	0	0	NA	TCGA	CRC_RNAseq
TCGA.AA.A017	C1	57	<=65yr	Female	T3	N0	M0	Stage II	NA	0	15.01	0	15.01	MSS	CIMP.Neg	CMS2	Left	NA	0	0	NA	TCGA	CRC_RNAseq
TCGA.AA.A01C	C1	75	>65yr	Male	T2	N1	M0	Stage III	NA	0	15.01	0	15.01	MSS	CIMP.Neg	CMS4	Right	NA	0	0	NA	TCGA	CRC_RNAseq
TCGA.AA.A01D	C3	47	<=65yr	Female	T3	N1	M0	Stage III	NA	1	6.01	1	10.97	MSS	CIMP.Low	CMS4	Left	NA	1	0	NA	TCGA	CRC_RNAseq
TCGA.AA.A01F	C1	72	>65yr	Male	T3	N1	M0	Stage III	NA	0	32	0	32	MSS	CIMP.Neg	CMS2	Left	NA	NA	NA	NA	TCGA	CRC_RNAseq
TCGA.AA.A01G	C1	63	<=65yr	Male	T3	N0	M0	Stage II	NA	0	11.99	0	11.99	MSS	CIMP.Low	CMS2	Right	NA	NA	NA	NA	TCGA	CRC_RNAseq
TCGA.AA.A01I	C1	76	>65yr	Male	T2	N0	M0	Stage I	NA	0	30.98	0	30.98	MSS	CIMP.Low	CMS2	Left	NA	0	1	NA	TCGA	CRC_RNAseq
TCGA.AA.A01K	C3	74	>65yr	Female	T3	N1	M0	Stage III	NA	0	30.98	0	30.98	MSS	CIMP.Neg	CMS4	Left	NA	0	1	NA	TCGA	CRC_RNAseq
TCGA.AA.A01P	C4	80	>65yr	Female	T3	N1	M0	Stage III	NA	1	25.03	1	38.04	MSI	CIMP.High	CMS1	Right	NA	1	0	NA	TCGA	CRC_RNAseq
TCGA.AA.A01Q	C4	48	<=65yr	Female	T3	N0	M0	Stage II	NA	0	1.02	0	1.02	MSI	CIMP.Low	UNKNOWN	Right	NA	NA	NA	NA	TCGA	CRC_RNAseq
TCGA.AA.A01R	C4	47	<=65yr	Male	T3	N1	M0	Stage III	NA	1	19.97	0	34.99	MSI	CIMP.Low	CMS1	Right	NA	0	1	NA	TCGA	CRC_RNAseq
TCGA.AA.A01S	C1	47	<=65yr	Female	T3	N1	M0	Stage III	NA	0	1.02	0	1.02	MSS	CIMP.Neg	CMS2	Left	NA	0	0	NA	TCGA	CRC_RNAseq
TCGA.AA.A01T	C1	63	<=65yr	Female	T3	N1	M0	Stage III	NA	0	33.02	0	33.02	MSS	NA	CMS2	Left	NA	0	0	NA	TCGA	CRC_RNAseq
TCGA.AA.A01V	C4	59	<=65yr	Male	T2	N0	M0	Stage I	NA	0	1.02	0	1.02	MSS	CIMP.Low	CMS3	Right	NA	0	0	NA	TCGA	CRC_RNAseq
TCGA.AA.A01X	C1	80	>65yr	Female	T2	N1	M0	Stage III	NA	1	25.99	0	25.99	MSS	CIMP.Neg	CMS2	Left	NA	0	1	NA	TCGA	CRC_RNAseq
TCGA.AA.A01Z	C1	68	>65yr	Male	T3	N0	M0	Stage II	NA	1	36.99	0	36.99	MSS	CIMP.Low	UNKNOWN	Right	NA	0	1	NA	TCGA	CRC_RNAseq
TCGA.AA.A022	C4	88	>65yr	Female	T4	N0	M0	Stage II	NA	0	0	0	0	MSI	CIMP.High	CMS1	Right	NA	1	0	NA	TCGA	CRC_RNAseq
TCGA.AA.A024	C1	81	>65yr	Male	T3	N0	M0	Stage II	NA	NA	NA	1	39.03	MSS	CIMP.Neg	CMS3	Left	NA	0	0	NA	TCGA	CRC_RNAseq
TCGA.AA.A029	C1	67	>65yr	Male	T3	N0	M0	Stage II	NA	0	51.94	0	51.94	MSS	CIMP.High	CMS3	Right	NA	0	1	NA	TCGA	CRC_RNAseq
TCGA.AA.A02E	C1	82	>65yr	Female	T3	N1	M1	Stage IV	NA	NA	NA	1	2.96	MSS	CIMP.Neg	CMS2	Right	NA	0	1	NA	TCGA	CRC_RNAseq
TCGA.AA.A02F	C1	68	>65yr	Female	T3	N1	M1	Stage IV	NA	0	39.95	0	39.95	MSS	CIMP.Neg	CMS2	Left	NA	0	0	NA	TCGA	CRC_RNAseq
TCGA.AA.A02H	C1	74	>65yr	Female	T3	N1	M1	Stage IV	NA	NA	NA	1	2	MSS	CIMP.Neg	CMS2	Left	NA	0	0	NA	TCGA	CRC_RNAseq
TCGA.AA.A02J	C1	70	>65yr	Female	T3	N0	M1	Stage IV	NA	NA	NA	1	5.03	MSS	CIMP.Neg	CMS2	Left	NA	0	0	NA	TCGA	CRC_RNAseq
TCGA.AA.A02K	C1	50	<=65yr	Male	T4	N1	M1	Stage IV	NA	1	10.05	1	13.99	MSS	CIMP.Neg	UNKNOWN	Right	NA	0	1	NA	TCGA	CRC_RNAseq
TCGA.AA.A02O	C1	82	>65yr	Male	T3	N0	M0	Stage II	NA	0	0.92	0	0.92	MSS	CIMP.High	CMS3	Right	NA	0	1	NA	TCGA	CRC_RNAseq
TCGA.AA.A02R	C4	84	>65yr	Female	T3	N0	M0	Stage II	NA	NA	NA	1	22.01	MSI	CIMP.High	CMS1	Right	NA	1	0	NA	TCGA	CRC_RNAseq
TCGA.AA.A02W	C1	73	>65yr	Female	T2	N0	M0	Stage I	NA	1	33.02	0	40.97	MSS	CIMP.Neg	CMS2	Left	NA	0	1	NA	TCGA	CRC_RNAseq
TCGA.AA.A02Y	C4	73	>65yr	Male	T2	N0	M0	Stage I	NA	0	39.95	0	39.95	NA	NA	CMS3	Right	NA	0	1	NA	TCGA	CRC_RNAseq
TCGA.AA.A03F	C1	90	>65yr	Female	T3	N1	M0	Stage III	NA	NA	NA	1	18.04	MSS	NA	CMS3	Right	NA	0	1	NA	TCGA	CRC_RNAseq
TCGA.AA.A03J	C4	65	<=65yr	Female	T2	N0	M0	Stage I	NA	0	40.93	0	40.93	MSS	CIMP.Low	CMS2	Left	NA	0	1	NA	TCGA	CRC_RNAseq
TCGA.AD.5900	C4	67	>65yr	Male	T2	N0	NA	Stage I	NA	0	12.16	0	12.16	MSI	CIMP.High	CMS1	Right	NA	1	0	NA	TCGA	CRC_RNAseq
TCGA.AD.6548	C4	81	>65yr	Female	T2	N0	M0	Stage I	NA	0	21.35	0	21.35	MSS	CIMP.Low	CMS4	Left	NA	0	1	NA	TCGA	CRC_RNAseq
TCGA.AD.6888	C1	73	>65yr	Male	T3	N1	M0	Stage III	NA	1	11.27	1	15.51	MSS	CIMP.Neg	CMS2	Right	NA	0	0	NA	TCGA	CRC_RNAseq
TCGA.AD.6889	C1	76	>65yr	Male	T3	N0	M0	Stage II	NA	1	49.8	1	83.18	MSI	CIMP.Neg	CMS1	Right	NA	1	0	NA	TCGA	CRC_RNAseq
TCGA.AD.6890	C1	65	<=65yr	Male	T1	N0	NA	NA	NA	0	24.51	0	24.51	MSS	CIMP.High	CMS2	Right	NA	0	0	NA	TCGA	CRC_RNAseq
TCGA.AD.6895	C2	84	>65yr	Male	T3	N1	M0	Stage III	NA	0	25.07	0	25.07	MSI	CIMP.Neg	CMS1	Right	NA	1	1	NA	TCGA	CRC_RNAseq
TCGA.AD.6899	C2	84	>65yr	Male	T4	N1	NA	Stage III	NA	NA	NA	1	5.78	MSS	CIMP.Neg	CMS4	Right	NA	0	0	NA	TCGA	CRC_RNAseq
TCGA.AD.6901	C3	78	>65yr	Male	T3	N0	NA	NA	NA	1	15.37	1	22.4	MSS	CIMP.Neg	CMS4	Right	NA	0	1	NA	TCGA	CRC_RNAseq
TCGA.AD.6963	C4	58	<=65yr	Male	T3	N0	NA	NA	NA	0	27.4	0	27.4	MSS	CIMP.Neg	CMS2	Right	NA	0	0	NA	TCGA	CRC_RNAseq
TCGA.AD.6964	C2	58	<=65yr	Male	T4	N1	NA	NA	NA	1	10.68	1	10.87	MSI	CIMP.Neg	CMS4	Right	NA	0	1	NA	TCGA	CRC_RNAseq
TCGA.AD.6965	C1	62	<=65yr	Male	T4	N1	M0	Stage III	NA	1	21.29	0	26.45	MSS	CIMP.Low	CMS2	Right	NA	0	1	NA	TCGA	CRC_RNAseq
TCGA.AD.A5EJ	C1	74	>65yr	Female	T3	N0	NA	Stage II	NA	0	0	0	0	NA	NA	CMS1	Right	NA	1	0	NA	TCGA	CRC_RNAseq
TCGA.AD.A5EK	C1	51	<=65yr	Male	T2	N0	NA	Stage I	NA	0	16.43	0	16.43	NA	CIMP.Low	UNKNOWN	Right	NA	0	1	NA	TCGA	CRC_RNAseq
TCGA.AF.2687	C3	57	<=65yr	Male	T3	N1	M0	Stage III	NA	NA	NA	0	46.91	MSS	NA	CMS4	Rectum	NA	0	0	NA	TCGA	CRC_RNAseq
TCGA.AF.2690	C2	76	>65yr	Female	T3	N1	M0	Stage III	NA	NA	NA	1	17.21	MSS	NA	CMS4	Rectum	NA	0	0	NA	TCGA	CRC_RNAseq
TCGA.AF.2691	C2	48	<=65yr	Female	T1	N0	M0	Stage I	NA	0	43	0	43	MSS	CIMP.Low	CMS3	Rectum	NA	0	0	NA	TCGA	CRC_RNAseq
TCGA.AF.2692	C3	54	<=65yr	Female	T3	N0	M0	Stage II	NA	1	10.74	0	13.53	MSS	CIMP.Neg	CMS3	NA	NA	0	0	NA	TCGA	CRC_RNAseq
TCGA.AF.2693	C2	75	>65yr	Male	T2	N0	NA	Stage I	NA	0	37.94	0	37.94	MSS	NA	CMS3	Left	NA	0	0	NA	TCGA	CRC_RNAseq
TCGA.AF.3400	C2	54	<=65yr	Male	T3	N0	M0	Stage II	NA	0	34.46	0	34.46	MSS	CIMP.Neg	CMS4	Left	NA	0	0	NA	TCGA	CRC_RNAseq
TCGA.AF.3911	C3	48	<=65yr	Male	T3	N1	NA	Stage III	NA	1	33.51	0	37.71	MSS	NA	CMS2	Rectum	NA	0	0	NA	TCGA	CRC_RNAseq
TCGA.AF.3913	C1	60	<=65yr	Male	T3	N1	M1	Stage IV	NA	NA	NA	1	10.38	MSS	CIMP.Neg	CMS4	Left	NA	0	0	NA	TCGA	CRC_RNAseq
TCGA.AF.4110	C2	77	>65yr	Male	T4	N1	NA	Stage IV	NA	0	29.96	0	29.96	MSS	NA	CMS4	Left	NA	0	1	NA	TCGA	CRC_RNAseq
TCGA.AF.5654	C1	73	>65yr	Female	T2	N0	M0	Stage I	NA	NA	NA	1	16.82	MSS	NA	CMS2	Left	NA	0	1	NA	TCGA	CRC_RNAseq
TCGA.AF.6136	C1	72	>65yr	Female	T3	N1	NA	Stage III	NA	1	20.01	0	24.34	MSS	NA	CMS3	Left	NA	0	0	NA	TCGA	CRC_RNAseq
TCGA.AF.6655	C3	66	>65yr	Male	T2	N1	M0	Stage III	NA	0	20.01	0	20.01	MSS	NA	CMS4	Rectum	NA	0	1	NA	TCGA	CRC_RNAseq
TCGA.AF.6672	C1	43	<=65yr	Male	T4	N1	NA	Stage IV	NA	1	15.14	0	24.57	MSS	NA	CMS3	Left	NA	0	1	NA	TCGA	CRC_RNAseq
TCGA.AF.A56K	C3	56	<=65yr	Male	T3	N0	M0	Stage II	NA	1	39.98	0	86.56	NA	NA	CMS4	Left	N	0	0	NA	TCGA	CRC_RNAseq
TCGA.AF.A56L	C1	48	<=65yr	Female	T3	N1	M0	Stage III	NA	0	65.93	0	65.93	NA	NA	CMS2	Left	Y	0	0	NA	TCGA	CRC_RNAseq
TCGA.AF.A56N	C1	47	<=65yr	Female	T3	N0	M0	Stage II	NA	0	11.83	0	11.83	NA	NA	CMS2	Rectum	Y	0	0	NA	TCGA	CRC_RNAseq
TCGA.AG.3574	C1	89	>65yr	Female	T3	N0	M0	Stage II	NA	NA	NA	1	36.01	MSS	CIMP.Neg	CMS2	Rectum	NA	0	0	NA	TCGA	CRC_RNAseq
TCGA.AG.3575	C4	51	<=65yr	Male	T3	N0	M0	Stage II	NA	0	11.99	0	11.99	MSS	CIMP.High	CMS4	Rectum	NA	0	0	NA	TCGA	CRC_RNAseq
TCGA.AG.3578	C1	76	>65yr	Female	T3	N0	M0	Stage II	NA	0	32	0	32	MSS	CIMP.Neg	CMS3	Rectum	NA	NA	NA	NA	TCGA	CRC_RNAseq
TCGA.AG.3580	C4	67	>65yr	Male	T1	N0	M0	Stage I	NA	0	8.02	0	8.02	MSS	CIMP.Neg	CMS2	Rectum	NA	0	0	NA	TCGA	CRC_RNAseq
TCGA.AG.3581	C2	63	<=65yr	Male	T2	N0	M0	Stage I	NA	0	7.06	0	7.06	MSS	CIMP.Neg	CMS2	Rectum	NA	0	0	NA	TCGA	CRC_RNAseq
TCGA.AG.3582	C3	75	>65yr	Male	T3	N1	M1	Stage IV	NA	NA	NA	1	36.01	MSS	CIMP.Neg	CMS2	Rectum	NA	NA	NA	NA	TCGA	CRC_RNAseq
TCGA.AG.3583	C4	66	>65yr	Male	T3	N1	M1	Stage IV	NA	NA	NA	1	20.04	MSS	CIMP.Neg	CMS2	Rectum	NA	0	0	NA	TCGA	CRC_RNAseq
TCGA.AG.3584	C4	60	<=65yr	Male	T3	N1	M1	Stage IV	NA	NA	NA	1	23.98	MSS	CIMP.Low	UNKNOWN	Rectum	NA	0	0	NA	TCGA	CRC_RNAseq
TCGA.AG.3586	C4	72	>65yr	Female	T3	N1	M0	Stage III	NA	0	1.02	0	1.02	MSS	CIMP.Neg	CMS2	Rectum	NA	NA	NA	NA	TCGA	CRC_RNAseq
TCGA.AG.3587	C1	65	<=65yr	Male	T2	N0	M0	Stage I	NA	1	39.95	0	45.99	MSS	CIMP.Neg	CMS2	Rectum	NA	NA	NA	NA	TCGA	CRC_RNAseq
TCGA.AG.3591	C1	66	>65yr	Female	T3	N0	M0	Stage II	NA	0	34	0	34	MSS	NA	CMS3	Rectum	NA	0	1	NA	TCGA	CRC_RNAseq
TCGA.AG.3592	C1	68	>65yr	Male	T3	N0	M0	Stage II	NA	0	34	0	34	MSS	NA	CMS2	Rectum	NA	0	0	NA	TCGA	CRC_RNAseq
TCGA.AG.3593	C4	72	>65yr	Female	T3	N0	M0	Stage II	NA	0	34	0	34	MSS	CIMP.Neg	CMS2	Rectum	NA	NA	NA	NA	TCGA	CRC_RNAseq
TCGA.AG.3594	C4	77	>65yr	Male	T3	N0	M0	Stage II	NA	NA	NA	1	2	MSS	CIMP.Neg	CMS3	Rectum	NA	0	0	NA	TCGA	CRC_RNAseq
TCGA.AG.3598	C4	69	>65yr	Male	T3	N0	M0	Stage II	NA	0	50	0	50	MSS	CIMP.Low	CMS2	Rectum	NA	0	0	NA	TCGA	CRC_RNAseq
TCGA.AG.3599	C4	70	>65yr	Male	T2	N0	M0	Stage I	NA	0	12.02	0	12.02	MSS	CIMP.Low	CMS3	Rectum	NA	0	0	NA	TCGA	CRC_RNAseq
TCGA.AG.3600	C4	62	<=65yr	Male	T3	N1	M0	Stage III	NA	0	6.04	0	6.04	MSS	CIMP.High	CMS1	Rectum	NA	NA	NA	NA	TCGA	CRC_RNAseq
TCGA.AG.3601	C1	68	>65yr	Male	T4	N1	M0	Stage III	NA	0	0	0	0	MSS	CIMP.Neg	CMS2	Rectum	NA	NA	NA	NA	TCGA	CRC_RNAseq
TCGA.AG.3602	C4	66	>65yr	Female	T3	N1	M0	Stage III	NA	0	0	0	0	MSS	CIMP.Neg	UNKNOWN	Rectum	NA	0	0	NA	TCGA	CRC_RNAseq
TCGA.AG.3605	C1	85	>65yr	Female	T3	N1	M1	Stage IV	NA	0	0.99	0	0.99	MSS	CIMP.Low	UNKNOWN	Rectum	NA	0	0	NA	TCGA	CRC_RNAseq
TCGA.AG.3608	C4	79	>65yr	Female	T3	N0	M0	Stage II	NA	0	15.93	0	15.93	NA	CIMP.Low	CMS2	Rectum	NA	NA	NA	NA	TCGA	CRC_RNAseq
TCGA.AG.3609	C2	65	<=65yr	Female	T3	N1	M0	Stage III	NA	0	19.97	0	19.97	MSS	CIMP.Neg	CMS4	Rectum	NA	NA	NA	NA	TCGA	CRC_RNAseq
TCGA.AG.3611	C1	72	>65yr	Male	T3	N0	M0	Stage II	NA	0	13.93	0	13.93	MSS	CIMP.Neg	CMS3	Rectum	NA	NA	NA	NA	TCGA	CRC_RNAseq
TCGA.AG.3612	C3	55	<=65yr	Female	T3	N1	M0	Stage III	NA	0	19.97	0	19.97	MSS	CIMP.Neg	CMS4	Rectum	NA	NA	NA	NA	TCGA	CRC_RNAseq
TCGA.AG.3725	C1	90	>65yr	Female	T3	N1	M0	Stage III	NA	0	20.96	0	20.96	MSS	NA	UNKNOWN	Rectum	NA	0	0	NA	TCGA	CRC_RNAseq
TCGA.AG.3726	C3	63	<=65yr	Female	T2	N0	M0	Stage I	NA	0	7.98	0	7.98	MSS	NA	CMS4	Rectum	NA	0	1	NA	TCGA	CRC_RNAseq
TCGA.AG.3727	C3	78	>65yr	Female	T3	N1	M0	Stage III	NA	0	0.99	0	0.99	MSS	NA	CMS4	Rectum	NA	0	1	NA	TCGA	CRC_RNAseq
TCGA.AG.3728	C2	73	>65yr	Male	T3	N1	M0	Stage III	NA	0	29.96	0	29.96	MSS	CIMP.Neg	CMS4	Rectum	NA	0	0	NA	TCGA	CRC_RNAseq
TCGA.AG.3731	C2	65	<=65yr	Male	T3	N1	M1	Stage IV	NA	0	36.99	0	36.99	NA	NA	CMS4	Rectum	NA	0	1	NA	TCGA	CRC_RNAseq
TCGA.AG.3732	C2	78	>65yr	Female	T2	N0	M0	Stage I	NA	0	32.95	0	32.95	MSS	NA	CMS3	Rectum	NA	0	0	NA	TCGA	CRC_RNAseq
TCGA.AG.3742	C1	85	>65yr	Female	T1	N0	M0	Stage I	NA	0	0.99	0	0.99	MSS	NA	CMS2	Rectum	NA	0	1	NA	TCGA	CRC_RNAseq
TCGA.AG.3878	C2	64	<=65yr	Male	T2	N0	M0	Stage I	NA	0	0.99	0	0.99	MSS	CIMP.Low	CMS4	Rectum	NA	0	1	NA	TCGA	CRC_RNAseq
TCGA.AG.3882	C2	66	>65yr	Female	T2	N0	M0	Stage I	NA	0	19.97	0	19.97	MSS	CIMP.Neg	CMS2	Rectum	NA	0	0	NA	TCGA	CRC_RNAseq
TCGA.AG.3883	C2	69	>65yr	Male	T2	N0	M0	Stage I	NA	0	1.02	0	1.02	MSS	CIMP.Neg	CMS4	Rectum	NA	0	0	NA	TCGA	CRC_RNAseq
TCGA.AG.3885	C2	71	>65yr	Female	T3	N1	M0	Stage III	NA	0	17.94	0	17.94	MSS	CIMP.Low	CMS1	Rectum	NA	0	1	NA	TCGA	CRC_RNAseq
TCGA.AG.3887	C4	68	>65yr	Male	T3	N0	M0	Stage II	NA	1	34.95	0	36.93	MSS	CIMP.Neg	CMS3	Rectum	NA	0	1	NA	TCGA	CRC_RNAseq
TCGA.AG.3890	C2	62	<=65yr	Male	T2	N0	M0	Stage I	NA	0	17.02	0	17.02	MSS	CIMP.Neg	CMS2	Rectum	NA	0	0	NA	TCGA	CRC_RNAseq
TCGA.AG.3892	C4	57	<=65yr	Female	T1	N0	M0	Stage I	NA	0	13.01	0	13.01	MSS	CIMP.Neg	CMS1	Rectum	NA	0	0	NA	TCGA	CRC_RNAseq
TCGA.AG.3893	C3	74	>65yr	Male	T3	N1	M0	Stage III	NA	0	34.99	0	34.99	MSS	CIMP.Neg	CMS4	Rectum	NA	0	0	NA	TCGA	CRC_RNAseq
TCGA.AG.3894	C1	65	<=65yr	Male	T3	N0	M0	Stage II	NA	0	13.99	0	13.99	MSS	CIMP.Neg	CMS2	Rectum	NA	0	0	NA	TCGA	CRC_RNAseq
TCGA.AG.3896	C3	85	>65yr	Female	T2	N0	M0	Stage I	NA	0	1.02	0	1.02	MSS	CIMP.Neg	CMS2	Rectum	NA	0	1	NA	TCGA	CRC_RNAseq
TCGA.AG.3898	C4	61	<=65yr	Male	T3	N0	M0	Stage II	NA	0	48	0	48	MSS	CIMP.Neg	CMS4	Rectum	NA	0	0	NA	TCGA	CRC_RNAseq
TCGA.AG.3901	C2	67	>65yr	Female	T3	N1	M0	Stage III	NA	0	25	0	25	MSS	CIMP.Neg	CMS4	Rectum	NA	0	1	NA	TCGA	CRC_RNAseq
TCGA.AG.3902	C4	61	<=65yr	Male	T3	N0	M0	Stage II	NA	0	32	0	32	NA	NA	CMS1	Rectum	NA	0	1	NA	TCGA	CRC_RNAseq
TCGA.AG.3909	C2	69	>65yr	Female	T3	N1	M0	Stage III	NA	0	19.97	0	19.97	MSS	CIMP.Neg	CMS2	Rectum	NA	0	1	NA	TCGA	CRC_RNAseq
TCGA.AG.3999	C1	61	<=65yr	Female	T3	N1	M0	Stage III	NA	1	25.99	0	28.02	MSS	CIMP.Neg	CMS2	Rectum	NA	0	1	NA	TCGA	CRC_RNAseq
TCGA.AG.4001	C3	74	>65yr	Female	T3	N0	M0	Stage II	NA	0	36.01	0	36.01	MSS	CIMP.Neg	CMS4	Rectum	NA	0	0	NA	TCGA	CRC_RNAseq
TCGA.AG.4005	C3	64	<=65yr	Male	T3	N1	M1	Stage IV	NA	0	14.03	0	14.03	MSS	CIMP.Neg	CMS4	Rectum	NA	0	1	NA	TCGA	CRC_RNAseq
TCGA.AG.4007	C2	87	>65yr	Male	T4	N1	M1	Stage IV	NA	0	1.02	0	1.02	MSS	CIMP.Low	CMS2	Rectum	NA	0	0	NA	TCGA	CRC_RNAseq
TCGA.AG.4008	C3	63	<=65yr	Male	T3	N0	M0	Stage II	NA	0	17.02	0	17.02	MSS	CIMP.Neg	CMS4	Rectum	NA	0	1	NA	TCGA	CRC_RNAseq
TCGA.AG.4015	C1	85	>65yr	Female	T3	N0	M0	Stage II	NA	0	0	0	0	MSS	CIMP.Neg	CMS2	Rectum	NA	0	0	NA	TCGA	CRC_RNAseq
TCGA.AG.4021	C3	84	>65yr	Female	T3	N1	M1	Stage IV	NA	1	0	1	3.98	MSS	NA	CMS4	Rectum	NA	0	1	NA	TCGA	CRC_RNAseq
TCGA.AG.4022	C2	59	<=65yr	Female	T3	N0	M0	Stage II	NA	0	45.99	0	45.99	MSS	NA	CMS4	Rectum	NA	0	0	NA	TCGA	CRC_RNAseq
TCGA.AG.A002	C1	35	<=65yr	Male	T2	N0	M0	Stage I	NA	0	20.96	0	20.96	MSS	CIMP.Neg	CMS1	Rectum	NA	1	0	NA	TCGA	CRC_RNAseq
TCGA.AG.A008	C1	50	<=65yr	Female	T2	N0	M0	Stage I	NA	0	13.93	0	13.93	MSS	CIMP.Neg	CMS3	Rectum	NA	0	1	NA	TCGA	CRC_RNAseq
TCGA.AG.A00C	C1	49	<=65yr	Female	T3	N1	M0	Stage III	NA	0	6.01	0	6.01	MSS	CIMP.Neg	CMS2	Rectum	NA	0	1	NA	TCGA	CRC_RNAseq
TCGA.AG.A00H	C3	75	>65yr	Male	T3	N0	M0	Stage II	NA	1	25.95	0	25.95	MSS	CIMP.Neg	CMS4	Rectum	NA	0	1	NA	TCGA	CRC_RNAseq
TCGA.AG.A00Y	C1	68	>65yr	Male	T3	N0	M0	Stage II	NA	1	4.04	0	23	MSS	CIMP.Neg	CMS2	Rectum	NA	0	1	NA	TCGA	CRC_RNAseq
TCGA.AG.A011	C1	80	>65yr	Male	T3	N0	M0	Stage II	NA	0	36.99	0	36.99	MSS	CIMP.Low	CMS2	Rectum	NA	NA	NA	NA	TCGA	CRC_RNAseq
TCGA.AG.A014	C1	86	>65yr	Male	T2	N0	M0	Stage I	NA	0	15.93	0	15.93	MSS	CIMP.Neg	UNKNOWN	Rectum	NA	0	1	NA	TCGA	CRC_RNAseq
TCGA.AG.A015	C1	64	<=65yr	Female	T1	N0	M0	Stage I	NA	1	17.02	0	36.01	MSS	CIMP.Neg	CMS3	Rectum	NA	0	0	NA	TCGA	CRC_RNAseq
TCGA.AG.A016	C1	55	<=65yr	Male	T3	N1	M1	Stage IV	NA	0	9.07	0	9.07	MSS	CIMP.Neg	CMS2	Rectum	NA	0	0	NA	TCGA	CRC_RNAseq
TCGA.AG.A01J	C1	59	<=65yr	Female	T3	N0	M0	Stage II	NA	0	1.02	0	1.02	MSS	CIMP.Neg	CMS2	Rectum	NA	0	0	NA	TCGA	CRC_RNAseq
TCGA.AG.A01L	C1	58	<=65yr	Male	T3	N1	M0	Stage III	NA	0	0	0	0	MSS	CIMP.Neg	CMS2	Rectum	NA	0	0	NA	TCGA	CRC_RNAseq
TCGA.AG.A01N	C1	68	>65yr	Female	T2	N0	M1	Stage IV	NA	0	30.98	0	30.98	MSS	CIMP.Neg	CMS2	Rectum	NA	0	0	NA	TCGA	CRC_RNAseq
TCGA.AG.A01W	C1	67	>65yr	Female	T3	N0	M0	Stage II	NA	0	0	0	0	MSS	NA	UNKNOWN	Rectum	NA	0	1	NA	TCGA	CRC_RNAseq
TCGA.AG.A01Y	C4	49	<=65yr	Female	T3	N0	M0	Stage II	NA	0	0	0	0	MSS	NA	CMS4	Rectum	NA	0	0	NA	TCGA	CRC_RNAseq
TCGA.AG.A020	C1	57	<=65yr	Female	T3	N1	M0	Stage III	NA	0	1.02	0	1.02	MSS	NA	CMS3	Rectum	NA	0	1	NA	TCGA	CRC_RNAseq
TCGA.AG.A023	C3	62	<=65yr	Female	T4	N1	M1	Stage IV	NA	1	27	1	51.94	MSS	CIMP.Neg	CMS4	Rectum	NA	0	1	NA	TCGA	CRC_RNAseq
TCGA.AG.A025	C1	62	<=65yr	Female	T1	N0	M0	Stage I	NA	0	49.93	0	49.93	MSS	CIMP.Neg	CMS2	Rectum	NA	0	1	NA	TCGA	CRC_RNAseq
TCGA.AG.A026	C1	66	>65yr	Male	T4	N0	M0	Stage II	NA	NA	NA	1	1.94	MSS	CIMP.Neg	CMS2	Rectum	NA	0	0	NA	TCGA	CRC_RNAseq
TCGA.AG.A02G	C1	66	>65yr	Male	T2	N1	M1	Stage IV	NA	1	18.99	1	38.93	MSS	CIMP.Neg	UNKNOWN	Rectum	NA	0	0	NA	TCGA	CRC_RNAseq
TCGA.AG.A02N	C1	67	>65yr	Male	T3	N0	M0	Stage II	NA	0	61.93	0	61.93	MSI	NA	CMS3	Rectum	NA	0	1	NA	TCGA	CRC_RNAseq
TCGA.AG.A02X	C1	77	>65yr	Male	T2	N0	M0	Stage I	NA	0	40.97	0	40.97	MSS	CIMP.High	CMS3	Rectum	NA	0	1	NA	TCGA	CRC_RNAseq
TCGA.AG.A032	C1	68	>65yr	Male	T3	N1	M0	Stage III	NA	1	26.02	0	38.01	MSS	CIMP.Neg	CMS2	Rectum	NA	0	1	NA	TCGA	CRC_RNAseq
TCGA.AG.A036	C1	71	>65yr	Male	T3	N1	M0	Stage III	NA	0	117.02	0	117.02	MSS	NA	CMS2	Rectum	NA	0	0	NA	TCGA	CRC_RNAseq
TCGA.AH.6544	C1	60	<=65yr	Male	T3	N1	M1	NA	NA	0	38.53	0	38.53	MSS	NA	CMS3	Left	NA	0	1	NA	TCGA	CRC_RNAseq
TCGA.AH.6547	C2	79	>65yr	Female	T3	N0	NA	NA	NA	NA	NA	1	2.5	MSS	NA	CMS4	Left	NA	0	0	NA	TCGA	CRC_RNAseq
TCGA.AH.6549	C3	66	>65yr	Male	T3	NA	NA	NA	NA	0	17.48	0	17.48	MSS	NA	CMS4	Rectum	NA	0	1	NA	TCGA	CRC_RNAseq
TCGA.AH.6643	C1	50	<=65yr	Male	T3	N1	M0	Stage III	NA	1	33.71	1	43.17	MSS	NA	CMS4	Left	NA	0	0	NA	TCGA	CRC_RNAseq
TCGA.AH.6644	C3	73	>65yr	Male	T3	NA	NA	NA	NA	0	27.53	0	27.53	MSS	NA	CMS4	Left	NA	0	1	NA	TCGA	CRC_RNAseq
TCGA.AH.6897	C1	48	<=65yr	Male	T2	N0	M0	Stage I	NA	0	26.41	0	26.41	MSS	NA	UNKNOWN	Left	NA	0	0	NA	TCGA	CRC_RNAseq
TCGA.AH.6903	C1	46	<=65yr	Male	T3	N1	M0	Stage III	NA	0	19.45	0	19.45	MSS	NA	CMS3	Left	NA	0	1	NA	TCGA	CRC_RNAseq
TCGA.AM.5820	C1	59	<=65yr	Female	T4	N1	M1	Stage IV	NA	0	0.46	0	0.46	MSS	CIMP.Neg	CMS4	Left	NA	0	0	NA	TCGA	CRC_RNAseq
TCGA.AM.5821	C4	68	>65yr	Female	T3	N0	M0	Stage II	NA	0	0.92	0	0.92	MSI	CIMP.High	CMS1	Left	NA	1	0	NA	TCGA	CRC_RNAseq
TCGA.AU.3779	C2	80	>65yr	Female	T3	N0	M0	Stage II	NA	0	14.49	0	14.49	MSS	CIMP.Neg	CMS4	Left	NA	0	0	NA	TCGA	CRC_RNAseq
TCGA.AU.6004	C2	69	>65yr	Female	T2	N0	M0	Stage I	NA	0	27.07	0	27.07	MSI	CIMP.High	CMS1	Right	NA	1	0	NA	TCGA	CRC_RNAseq
TCGA.AY.4070	C3	50	<=65yr	Female	T3	N1	M0	Stage III	NA	1	6.11	1	16.29	MSS	CIMP.Neg	CMS4	Right	NA	0	0	NA	TCGA	CRC_RNAseq
TCGA.AY.4071	C2	63	<=65yr	Female	T1	N0	NA	Stage I	NA	NA	NA	1	0.95	MSS	CIMP.Neg	CMS2	NA	NA	0	0	NA	TCGA	CRC_RNAseq
TCGA.AY.5543	C4	65	<=65yr	Female	T3	N1	M1	Stage IV	NA	0	32.98	0	32.98	MSS	CIMP.Neg	UNKNOWN	Right	NA	0	1	NA	TCGA	CRC_RNAseq
TCGA.AY.6196	C2	47	<=65yr	Male	T3	N1	NA	Stage III	NA	0	0.2	0	0.2	MSS	CIMP.Neg	CMS4	Right	NA	1	0	NA	TCGA	CRC_RNAseq
TCGA.AY.6197	C4	60	<=65yr	Male	T3	N0	NA	Stage II	NA	0	21.42	0	21.42	MSI	CIMP.Low	CMS1	Right	NA	0	0	NA	TCGA	CRC_RNAseq
TCGA.AY.6386	C4	66	>65yr	Female	T3	N1	M0	Stage III	NA	0	17.81	0	17.81	MSS	CIMP.Low	CMS3	Right	NA	0	1	NA	TCGA	CRC_RNAseq
TCGA.AY.A54L	C1	74	>65yr	Female	T2	N0	M0	Stage I	NA	1	13.01	0	17.25	NA	CIMP.Low	UNKNOWN	Right	N	0	1	NA	TCGA	CRC_RNAseq
TCGA.AY.A69D	C1	55	<=65yr	Female	T3	N0	M0	Stage II	NA	0	17.84	0	17.84	NA	NA	CMS3	Right	N	0	1	NA	TCGA	CRC_RNAseq
TCGA.AY.A71X	C1	54	<=65yr	Female	T2	N0	M0	Stage I	NA	0	19.32	0	19.32	NA	NA	CMS3	Right	N	0	1	NA	TCGA	CRC_RNAseq
TCGA.AY.A8YK	C1	44	<=65yr	Male	T3	N1	M1	Stage IV	NA	0	18.82	0	18.82	NA	NA	CMS2	Left	Y	0	0	NA	TCGA	CRC_RNAseq
TCGA.AZ.4308	C3	47	<=65yr	Female	T3	N1	M0	Stage III	NA	0	109.2	0	109.2	MSS	CIMP.Neg	CMS4	Left	NA	0	0	NA	TCGA	CRC_RNAseq
TCGA.AZ.4313	C1	51	<=65yr	Female	T1	N0	M0	Stage I	NA	0	75.89	0	75.89	MSI	CIMP.Neg	CMS3	Left	NA	0	1	NA	TCGA	CRC_RNAseq
TCGA.AZ.4315	C4	61	<=65yr	Male	T3	N0	M0	Stage II	NA	0	58.34	0	58.34	MSS	CIMP.Neg	CMS1	Right	NA	0	1	NA	TCGA	CRC_RNAseq
TCGA.AZ.4323	C2	37	<=65yr	Male	T4	N1	M1	Stage IV	NA	NA	NA	1	1.41	MSS	CIMP.Neg	CMS4	Right	NA	0	0	NA	TCGA	CRC_RNAseq
TCGA.AZ.4614	C1	71	>65yr	Female	T4	N1	M1	Stage IV	NA	NA	NA	1	5.65	MSS	CIMP.High	CMS1	NA	NA	1	0	NA	TCGA	CRC_RNAseq
TCGA.AZ.4615	C4	84	>65yr	Male	T3	N1	M0	Stage III	NA	1	22.6	0	32.92	MSI	CIMP.High	CMS1	NA	NA	1	0	NA	TCGA	CRC_RNAseq
TCGA.AZ.4616	C4	82	>65yr	Female	T3	N1	M1	Stage IV	NA	NA	NA	1	5.12	MSS	CIMP.Low	CMS1	Right	NA	0	1	NA	TCGA	CRC_RNAseq
TCGA.AZ.4682	C1	61	<=65yr	Male	T3	N0	M1	Stage IV	NA	NA	NA	1	22.34	NA	NA	CMS2	Left	NA	0	0	NA	TCGA	CRC_RNAseq
TCGA.AZ.4684	C2	49	<=65yr	Male	T3	N1	M1	Stage IV	NA	1	13.5	0	64.95	MSS	CIMP.Neg	CMS4	NA	NA	0	0	NA	TCGA	CRC_RNAseq
TCGA.AZ.5403	C3	43	<=65yr	Male	T3	N0	NA	Stage II	NA	1	9.99	1	62.75	MSS	CIMP.Neg	CMS4	Left	NA	0	0	NA	TCGA	CRC_RNAseq
TCGA.AZ.5407	C1	51	<=65yr	Female	T1	N0	M0	Stage I	NA	0	88.14	0	88.14	MSS	CIMP.Low	CMS3	Right	NA	0	1	NA	TCGA	CRC_RNAseq
TCGA.AZ.6598	C4	77	>65yr	Female	T3	N0	NA	Stage II	NA	NA	NA	1	49.38	MSI	CIMP.High	CMS1	NA	NA	1	0	NA	TCGA	CRC_RNAseq
TCGA.AZ.6599	C1	72	>65yr	Male	T2	N0	NA	Stage I	NA	NA	NA	1	6.77	MSS	CIMP.Low	CMS3	Right	NA	0	1	NA	TCGA	CRC_RNAseq
TCGA.AZ.6600	C3	64	<=65yr	Male	T4	N1	M1	Stage IV	NA	NA	NA	1	12.09	MSS	CIMP.Neg	CMS4	Right	NA	0	1	NA	TCGA	CRC_RNAseq
TCGA.AZ.6601	C4	68	>65yr	Male	T3	N0	M0	Stage II	NA	1	74.57	1	99.93	MSI	CIMP.Low	CMS1	Left	NA	0	1	NA	TCGA	CRC_RNAseq
TCGA.AZ.6603	C3	77	>65yr	Female	T2	N1	NA	NA	NA	NA	NA	1	29.53	MSS	CIMP.Neg	CMS4	Left	NA	0	0	NA	TCGA	CRC_RNAseq
TCGA.AZ.6605	C2	77	>65yr	Male	T4	N1	M0	Stage III	NA	NA	NA	1	5.22	MSS	CIMP.Neg	CMS4	Right	NA	0	0	NA	TCGA	CRC_RNAseq
TCGA.AZ.6606	C1	81	>65yr	Male	T4	N1	M1	Stage IV	NA	NA	NA	1	11.73	MSS	CIMP.High	CMS1	Right	NA	0	1	NA	TCGA	CRC_RNAseq
TCGA.AZ.6607	C2	69	>65yr	Male	T4	N1	M1	Stage IV	NA	NA	NA	1	3.19	MSS	CIMP.Low	CMS4	Left	NA	0	1	NA	TCGA	CRC_RNAseq
TCGA.AZ.6608	C1	55	<=65yr	Female	T2	N1	M0	Stage III	NA	NA	NA	1	1.94	MSS	CIMP.Neg	CMS2	Left	NA	0	1	NA	TCGA	CRC_RNAseq
TCGA.BM.6198	C2	73	>65yr	Male	T3	N1	NA	Stage III	NA	0	21.22	0	21.22	MSS	NA	CMS4	Rectum	NA	0	1	NA	TCGA	CRC_RNAseq
TCGA.CA.5254	C1	42	<=65yr	Female	T3	N0	M0	Stage II	NA	0	12.68	0	12.68	MSS	CIMP.High	UNKNOWN	Right	NA	0	0	NA	TCGA	CRC_RNAseq
TCGA.CA.5255	C1	45	<=65yr	Male	T3	N0	M0	Stage II	NA	0	12.35	0	12.35	MSS	CIMP.Low	CMS1	Right	NA	0	1	NA	TCGA	CRC_RNAseq
TCGA.CA.5256	C1	54	<=65yr	Female	T3	N0	M0	Stage II	NA	0	12.45	0	12.45	MSS	CIMP.Neg	CMS2	Right	NA	0	0	NA	TCGA	CRC_RNAseq
TCGA.CA.5796	C2	52	<=65yr	Female	T3	N0	M0	Stage II	NA	0	12.39	0	12.39	MSS	CIMP.Neg	CMS3	Right	NA	0	1	NA	TCGA	CRC_RNAseq
TCGA.CA.5797	C3	56	<=65yr	Male	T3	N0	M0	Stage II	NA	0	12.58	0	12.58	MSS	CIMP.Neg	CMS4	Left	NA	0	0	NA	TCGA	CRC_RNAseq
TCGA.CA.6715	C1	63	<=65yr	Male	T3	N1	M0	Stage III	NA	0	12.58	0	12.58	MSS	CIMP.Neg	CMS2	Left	NA	0	0	NA	TCGA	CRC_RNAseq
TCGA.CA.6716	C1	65	<=65yr	Male	T3	N0	M0	Stage II	NA	0	12.19	0	12.19	MSS	CIMP.Low	CMS2	Right	NA	0	1	NA	TCGA	CRC_RNAseq
TCGA.CA.6717	C2	57	<=65yr	Male	T3	N0	M0	Stage II	NA	0	12.75	0	12.75	MSS	CIMP.Low	CMS4	Right	NA	1	0	NA	TCGA	CRC_RNAseq
TCGA.CA.6718	C4	46	<=65yr	Male	T3	N0	M0	Stage II	NA	1	6.8	1	10.05	MSS	CIMP.High	CMS1	Right	NA	1	1	NA	TCGA	CRC_RNAseq
TCGA.CA.6719	C3	77	>65yr	Male	T3	N0	M0	Stage II	NA	1	11.63	0	14.29	MSS	CIMP.Low	CMS4	Left	NA	0	0	NA	TCGA	CRC_RNAseq
TCGA.CI.6619	C2	41	<=65yr	Male	T3	N1	M1	Stage IV	NA	0	6.04	0	6.04	MSS	NA	CMS4	Rectum	NA	0	0	NA	TCGA	CRC_RNAseq
TCGA.CI.6620	C1	41	<=65yr	Female	T3	N1	M1	Stage IV	NA	1	2.96	0	33.15	MSS	NA	CMS4	Rectum	NA	0	1	NA	TCGA	CRC_RNAseq
TCGA.CI.6621	C2	63	<=65yr	Male	T3	N1	NA	Stage III	NA	0	13.76	0	13.76	MSS	NA	CMS4	Rectum	NA	0	0	NA	TCGA	CRC_RNAseq
TCGA.CI.6622	C1	74	>65yr	Male	T4	N0	M0	Stage II	NA	0	44.74	0	44.74	MSS	NA	CMS2	Rectum	NA	0	1	NA	TCGA	CRC_RNAseq
TCGA.CI.6623	C1	44	<=65yr	Male	T1	N0	M0	Stage I	NA	0	47.4	0	47.4	MSS	NA	UNKNOWN	Rectum	NA	0	0	NA	TCGA	CRC_RNAseq
TCGA.CI.6624	C2	53	<=65yr	Female	T2	N0	M0	Stage I	NA	0	48.16	0	48.16	MSS	NA	CMS4	Left	NA	0	0	NA	TCGA	CRC_RNAseq
TCGA.CK.4947	C2	46	<=65yr	Female	T4	N1	M0	Stage III	NA	1	0.69	0	17.54	MSS	CIMP.Low	CMS4	Left	NA	0	1	NA	TCGA	CRC_RNAseq
TCGA.CK.4948	C3	45	<=65yr	Female	T3	N1	M0	Stage III	NA	0	147.9	0	147.9	MSS	CIMP.Neg	CMS4	Left	NA	0	1	NA	TCGA	CRC_RNAseq
TCGA.CK.4950	C2	68	>65yr	Female	T3	N1	M0	Stage III	NA	0	85.38	0	85.38	MSS	CIMP.Low	CMS3	Right	NA	0	1	NA	TCGA	CRC_RNAseq
TCGA.CK.4951	C4	79	>65yr	Female	T3	N0	M0	Stage II	NA	1	15.77	1	70.11	MSI	CIMP.High	CMS1	Right	NA	1	0	NA	TCGA	CRC_RNAseq
TCGA.CK.4952	C1	48	<=65yr	Female	T4	N1	M0	Stage III	NA	0	15.6	0	15.6	MSS	CIMP.High	CMS3	Right	NA	1	0	NA	TCGA	CRC_RNAseq
TCGA.CK.5912	C1	81	>65yr	Male	T2	N0	NA	Stage I	NA	NA	NA	1	49.05	MSS	CIMP.Neg	UNKNOWN	Right	NA	0	0	NA	TCGA	CRC_RNAseq
TCGA.CK.5913	C4	58	<=65yr	Female	T3	N0	NA	Stage II	NA	0	51.28	0	51.28	MSI	CIMP.High	CMS1	Right	NA	0	0	NA	TCGA	CRC_RNAseq
TCGA.CK.5914	C4	81	>65yr	Male	T3	N1	NA	Stage III	NA	0	21.98	0	21.98	MSS	CIMP.Low	CMS2	Left	NA	0	0	NA	TCGA	CRC_RNAseq
TCGA.CK.5915	C1	63	<=65yr	Male	T2	N0	NA	Stage I	NA	0	0	0	0	MSS	CIMP.Low	CMS2	Left	NA	0	0	NA	TCGA	CRC_RNAseq
TCGA.CK.5916	C4	71	>65yr	Female	T1	N0	M0	Stage I	NA	1	9.59	1	21.12	MSI	CIMP.High	CMS1	Right	NA	0	0	NA	TCGA	CRC_RNAseq
TCGA.CK.6746	C4	84	>65yr	Female	T4	N0	NA	Stage II	NA	0	0	0	0	MSI	CIMP.High	CMS1	Right	NA	1	0	NA	TCGA	CRC_RNAseq
TCGA.CK.6747	C1	87	>65yr	Female	T3	N0	NA	Stage II	NA	0	82.88	0	82.88	MSI	CIMP.Low	CMS3	Right	NA	1	0	NA	TCGA	CRC_RNAseq
TCGA.CK.6748	C3	45	<=65yr	Female	T3	N1	M1	Stage IV	NA	0	2	0	2	MSS	CIMP.Neg	CMS4	Left	NA	0	1	NA	TCGA	CRC_RNAseq
TCGA.CK.6751	C4	88	>65yr	Female	T2	N0	NA	Stage I	NA	0	124.18	0	124.18	MSS	CIMP.High	CMS3	Right	NA	0	1	NA	TCGA	CRC_RNAseq
TCGA.CL.4957	C1	79	>65yr	Female	T3	N1	M0	NA	NA	NA	NA	1	NA	MSS	NA	CMS2	NA	NA	0	0	NA	TCGA	CRC_RNAseq
TCGA.CL.5917	C1	71	>65yr	Female	T3	N1	NA	Stage III	NA	0	78.06	0	78.06	MSS	NA	CMS4	Left	NA	0	1	NA	TCGA	CRC_RNAseq
TCGA.CL.5918	C1	90	>65yr	Female	T3	N0	NA	Stage II	NA	0	7.16	0	7.16	MSS	NA	CMS2	Left	NA	0	0	NA	TCGA	CRC_RNAseq
TCGA.CM.4743	C4	69	>65yr	Male	T3	N0	M0	Stage II	NA	0	23.03	0	23.03	MSI	CIMP.Low	CMS1	Right	NA	0	0	NA	TCGA	CRC_RNAseq
TCGA.CM.4744	C4	69	>65yr	Male	T2	N0	M0	Stage I	NA	0	20.01	0	20.01	NA	NA	CMS1	Right	NA	0	1	NA	TCGA	CRC_RNAseq
TCGA.CM.4746	C1	61	<=65yr	Male	T2	N0	M0	Stage I	NA	0	36.99	0	36.99	MSI	CIMP.Neg	CMS3	Left	NA	0	1	NA	TCGA	CRC_RNAseq
TCGA.CM.4747	C3	47	<=65yr	Male	T4	N1	M1	Stage IV	NA	0	25	0	25	MSS	CIMP.Low	CMS4	Right	NA	0	1	NA	TCGA	CRC_RNAseq
TCGA.CM.4748	C1	53	<=65yr	Male	T4	N1	M0	Stage III	NA	0	26.02	0	26.02	MSS	CIMP.Neg	CMS4	Right	NA	0	1	NA	TCGA	CRC_RNAseq
TCGA.CM.4750	C4	34	<=65yr	Female	T1	N1	M0	Stage III	NA	0	8.02	0	8.02	MSS	CIMP.Neg	CMS2	NA	NA	1	0	NA	TCGA	CRC_RNAseq
TCGA.CM.4751	C2	62	<=65yr	Male	T3	N1	M0	Stage III	NA	0	27	0	27	MSS	CIMP.Low	CMS1	Right	NA	0	1	NA	TCGA	CRC_RNAseq
TCGA.CM.4752	C4	58	<=65yr	Male	T3	N0	M0	Stage II	NA	0	13.01	0	13.01	MSS	CIMP.Neg	CMS2	Right	NA	0	0	NA	TCGA	CRC_RNAseq
TCGA.CM.5341	C4	82	>65yr	Female	T2	N1	M0	Stage III	NA	0	29.04	0	29.04	MSS	CIMP.Neg	CMS4	Left	NA	0	0	NA	TCGA	CRC_RNAseq
TCGA.CM.5344	C3	39	<=65yr	Female	T3	N1	M0	Stage III	NA	0	22.01	0	22.01	MSS	CIMP.Neg	CMS4	Left	NA	0	0	NA	TCGA	CRC_RNAseq
TCGA.CM.5348	C3	72	>65yr	Male	T3	N1	M0	Stage III	NA	0	22.96	0	22.96	MSS	CIMP.Neg	CMS4	Right	NA	0	0	NA	TCGA	CRC_RNAseq
TCGA.CM.5349	C3	68	>65yr	Female	T3	N0	M0	Stage II	NA	0	30.06	0	30.06	MSS	CIMP.Neg	CMS4	Right	NA	0	1	NA	TCGA	CRC_RNAseq
[truncated: 197 more rows]

## Sheet: Supplementary file 1g
Clinicopathological characteristics		All samples	C1	C2	C3	C4	P value
		Statistics	Statistics	Statistics	Statistics	Statistics
Age		n=1839	0.367	0.203	0.22	0.21	0.002
	<=65 yr	0.425	n=274 (40.6%)	n=174 (46.5%)	n=194 (47.9%)	n=139 (36.1%)
	＞65 yr	0.575	n=401 (59.4%)	n=200 (53.5%)	n=211 (52.1%)	n=246 (63.9%)
Gender		n=1842	0.366	0.203	0.222	0.209	0.004
	Male	0.467	n=387 (57.3%)	n=189 (50.5%)	n=226 (55.4%)	n=179 (46.5%)
	Female	0.533	n=288 (42.7%)	n=185(49.5%)	n=182 (44.6%）	n=206 (53.5%)
Grade		n=264	0.307	0.189	0.292	0.212	0.013
	1	0.068	n=6 (7.4%)	n=3 (6.0%)	n=3 (3.9%)	n=6 (10.7%)
	2	0.735	n=64 (79.0%)	n=39 (78.0%)	n=61 (79.2%)	n=30 (53.6%)
	3	0.197	n=11 (13.6%)	n=8 (16.0%)	n=13 (16.9%)	n=20 (35.7%)
Site		n=1548	0.376	0.207	0.209	0.207	0.001
	Right colon	0.092	n=220 (37.8%）	n=146 (45.5%）	n=109 (33.6%）	n=177 (55.1%）
	Left colon	0.487	n=306 (52.6%）	n=142 (44.2%）	n=186 (57.4%）	n=120 (37.4%）
	Rectum	0.421	n=56（9.6%）	n=33（10.3%）	n=29 (9.0%）	n=24 (7.5%）
Stage at diagnosis		n=1944	0.363	0.202	0.223	0.212	0.001
	I	0.117	n=77 (10.9%)	n=42 (10.7%)	n=30 (6.9%)	n=78 (18.9%)
	II	0.431	n=308 (43.6%)	n=165 (42.1%)	n=176 (40.6%)	n=189 (45.9%)
	III	0.322	n=219 (31.0%)	n=142 (36.2%)	n=147 (33.9%)	n=118 (28.6%)
	IV	0.13	n=102 (14.4%)	n=43 (11.0%)	n=81 (18.7%)	n=27 (6.6%)
Adjuvant chemotherapy		n=741	0.389	0.216	0.21	0.184	0.002
	No	0.598	n=175 (60.8%)	n=90 (56.3%)	n=79 (50.6%)	n=99 (72.3%)
	Yes	0.402	n=113 (39.2%)	n=70 (43.8%)	n=77 (49.4%)	n=38 (27.7%)
Microsatellite status		n=1497	0.37	0.199	0.219	0.212	0.001
	Stable (MSS)	0.804	n=487 (87.9%）	n=256 (85.9%）	n=291 (88.7%）	n=169 (53.3%）
	Instable (MSI)	0.196	n=67 (12.1%）	n=42 (14.1%）	n=37 (11.3%）	n=148 (46.7%）

## Sheet: Supplementary file 1h
Multivariate Cox proportional hazard regression analysis	Disease-free survival				Overall survival
	n= 1525, number of events= 379				n= 1325, number of events= 383
	HR	lower (95% CI)	upper (95% CI)	P value	HR	lower (95% CI)	upper (95% CI)	P value
CCCRC C1 (vs. C3)	0.8763	0.6319	1.2152	0.428559	0.8515	0.6155	1.1778	0.331379
CCCRC C2 (vs. C3)	1.0911	0.7835	1.5195	0.605911	1.0468	0.7569	1.4477	0.782108
CCCRC C4 (vs. C3)	0.6009	0.425	0.8497	0.003957	0.6498	0.4701	0.898	0.009019
Age >65yr (vs. <=65yr)	0.8536	0.692	1.053	0.139441	1.5364	1.2332	1.914	0.000129
Gender Male (vs. Female)	1.2555	1.0196	1.5458	0.032098	1.1992	0.9753	1.4744	0.084885
TNM_stage StageIII&IV (vs. StageI&II)	2.3455	1.8618	2.9547	4.63e-13	2.7775	2.1927	3.5182	< 2e-16
TNM_stage NA (vs. StageI&II)	2.0278	0.7319	5.6187	0.173954	4.0155	1.8929	8.5181	0.000291
MSI_status MSS (vs. MSI)	1.8422	1.159	2.928	0.009761	1.3746	0.876	2.157	0.166315
MSI_status NA (vs. MSI)	1.381	0.803	2.3754	0.24329	1.4202	0.8197	2.4606	0.210971
CMS1 (vs. CMS4)	0.4397	0.291	0.6644	9.59e-05	0.5665	0.3724	0.862	0.007963
CMS2 (vs. CMS4)	0.4719	0.3075	0.7242	0.000589	0.5402	0.3465	0.8423	0.006575
CMS3 (vs. CMS4)	0.8049	0.5531	1.1713	0.25683	0.8669	0.5855	1.2836	0.475707
CMS UNKNOWN (vs. CMS4)	0.7781	0.4943	1.2248	0.278376	0.962	0.6216	1.4886	0.861845
Tumor Site Right (vs. Left)	0.8031	0.5039	1.2802	0.356768	0.8136	0.4653	1.4224	0.469162
Tumor Site Retum (vs. Left)	0.8887	0.6918	1.1416	0.355643	1.1135	0.8622	1.438	0.410206
Tumor Site NA (vs. Left)	1.4066	0.6473	3.0565	0.38892	1.2049	0.5194	2.7952	0.664142
KRAS mutation (vs. Wild)	1.3692	1.0089	1.8581	0.043706	1.2652	0.9552	1.6758	0.100996
KRAS NA (vs. Wild)	0.8567	0.4533	1.619	0.633838	0.8076	0.3346	1.9492	0.634552
BRAF mutation (vs. Wild)	1.6196	1.1622	2.257	0.004402	0.8982	0.6484	1.2443	0.518605
BRAF NA (vs. Wild)	1.508	0.9212	2.4687	0.102331	0.8949	0.5215	1.5356	0.686855
Adjuvant chemotherapy YES (vs. NO)	0.9923	0.7293	1.3501	0.960651	1.0706	0.7859	1.4585	0.665373
Adjuvant chemotherapy NA (vs. NO)	0.9158	0.6609	1.269	0.597082	0.6105	0.443	0.8413	0.002562
Grade1 (vs. Grade3)	0.7817	0.2755	2.2178	0.643414	1.3482	0.484	3.7556	0.567543
Grade2 (vs. Grade3)	1.4156	0.4613	4.3435	0.5435	2.2244	0.7289	6.7879	0.160164
Grade NA (vs. Grade3)	1.2694	0.3621	4.4504	0.709346	1.1289	0.2538	5.0213	0.873451
Note: MSI: microsatellite instability; MSS: microsatellite stability; NA: not available.

## Sheet: Supplementary file 1i
id	CCCRC	immunophenotype
TCGA-3L-AA1B	C3	excluded
TCGA-4N-A93T	C1	desert
TCGA-A6-2671	C3	excluded
TCGA-A6-2672	C4	excluded
TCGA-A6-2676	C4	desert
TCGA-A6-2677	C1	desert
TCGA-A6-2680	C3	desert
TCGA-A6-2681	C2	desert
TCGA-A6-2682	C3	desert
TCGA-A6-2684	C3	excluded
TCGA-A6-2685	C2	excluded
TCGA-A6-2686	C4	inflamed
TCGA-A6-3808	C2	excluded
TCGA-A6-3809	C4	inflamed
TCGA-A6-3810	C2	excluded
TCGA-A6-4105	C4	excluded
TCGA-A6-4107	C2	desert
TCGA-A6-5657	C3	excluded
TCGA-A6-5659	C1	desert
TCGA-A6-5660	C1	excluded
TCGA-A6-5661	C4	excluded
TCGA-A6-5665	C4	excluded
TCGA-A6-5666	C1	desert
TCGA-A6-6140	C1	inflamed
TCGA-A6-6142	C3	desert
TCGA-A6-6648	C1	desert
TCGA-A6-6649	C3	excluded
TCGA-A6-6651	C2	excluded
TCGA-A6-6652	C1	desert
TCGA-A6-6653	C3	desert
TCGA-A6-6654	C2	excluded
TCGA-A6-A565	C2	excluded
TCGA-A6-A56B	C1	inflamed
TCGA-A6-A5ZU	C2	desert
TCGA-AA-3518	C4	inflamed
TCGA-AA-3520	C3	excluded
TCGA-AA-3524	C4	inflamed
TCGA-AA-3525	C4	desert
TCGA-AA-3526	C4	inflamed
TCGA-AA-3527	C2	desert
TCGA-AA-3531	C1	desert
TCGA-AA-3544	C4	desert
TCGA-AA-3554	C2	inflamed
TCGA-AA-3555	C3	excluded
TCGA-AA-3560	C4	desert
TCGA-AA-3561	C1	excluded
TCGA-AA-3562	C3	desert
TCGA-AA-3666	C4	desert
TCGA-AA-3667	C2	excluded
TCGA-AA-3672	C2	excluded
TCGA-AA-3673	C3	excluded
TCGA-AA-3684	C2	excluded
TCGA-AA-3692	C4	desert
TCGA-AA-3693	C1	excluded
TCGA-AA-3710	C4	inflamed
TCGA-AA-3715	C2	excluded
TCGA-AA-3815	C4	inflamed
TCGA-AA-3821	C1	desert
TCGA-AA-3833	C2	inflamed
TCGA-AA-3845	C4	excluded
TCGA-AA-3852	C2	excluded
TCGA-AA-3855	C4	inflamed
TCGA-AA-3856	C4	inflamed
TCGA-AA-3862	C4	excluded
TCGA-AA-3864	C4	desert
TCGA-AA-3866	C4	inflamed
TCGA-AA-3867	C3	desert
TCGA-AA-3870	C2	excluded
TCGA-AA-3875	C4	inflamed
TCGA-AA-3930	C4	excluded
TCGA-AA-3939	C2	inflamed
TCGA-AA-3941	C1	desert
TCGA-AA-3947	C4	inflamed
TCGA-AA-3952	C1	desert
TCGA-AA-3955	C1	desert
TCGA-AA-3966	C2	excluded
TCGA-AA-3970	C4	excluded
TCGA-AA-3971	C2	excluded
TCGA-AA-3973	C1	desert
TCGA-AA-3975	C3	excluded
TCGA-AA-3979	C1	desert
TCGA-AA-3982	C4	inflamed
TCGA-AA-3984	C4	inflamed
TCGA-AA-3986	C2	inflamed
TCGA-AA-A004	C2	inflamed
TCGA-AA-A00E	C4	excluded
TCGA-AA-A00Z	C1	desert
TCGA-AA-A01T	C1	desert
TCGA-AA-A01Z	C1	desert
TCGA-AA-A022	C4	inflamed
TCGA-AA-A02H	C1	desert
TCGA-AA-A02J	C1	desert
TCGA-AA-A02K	C1	desert
TCGA-AD-5900	C4	inflamed
TCGA-AD-6548	C4	excluded
TCGA-AD-6888	C1	excluded
TCGA-AD-6890	C1	desert
TCGA-AD-6899	C2	inflamed
TCGA-AD-6901	C3	desert
TCGA-AD-6963	C4	inflamed
TCGA-AD-6964	C2	inflamed
TCGA-AD-A5EK	C1	desert
TCGA-AF-3911	C3	desert
TCGA-AG-3608	C4	inflamed
TCGA-AG-3878	C2	excluded
TCGA-AG-3898	C4	desert
TCGA-AG-4005	C3	excluded
TCGA-AG-4007	C2	excluded
TCGA-AG-4008	C3	desert
TCGA-AG-4022	C2	excluded
TCGA-AG-A008	C1	desert
TCGA-AG-A00Y	C1	inflamed
TCGA-AG-A023	C3	excluded
TCGA-AG-A026	C1	desert
TCGA-AG-A02N	C1	inflamed
TCGA-AG-A036	C1	desert
TCGA-AM-5820	C1	desert
TCGA-AM-5821	C4	inflamed
TCGA-AU-3779	C2	inflamed
TCGA-AU-6004	C2	excluded
TCGA-AY-4070	C3	excluded
TCGA-AY-6386	C4	inflamed
TCGA-AY-A54L	C1	excluded
TCGA-AY-A69D	C1	desert
TCGA-AY-A8YK	C1	desert
TCGA-AZ-4308	C3	desert
TCGA-AZ-4313	C1	desert
TCGA-AZ-4315	C4	excluded
TCGA-AZ-4614	C1	inflamed
TCGA-AZ-4616	C4	inflamed
TCGA-AZ-5403	C3	desert
TCGA-AZ-5407	C1	inflamed
TCGA-AZ-6598	C4	desert
TCGA-AZ-6599	C1	inflamed
TCGA-AZ-6600	C3	desert
TCGA-AZ-6601	C4	inflamed
TCGA-AZ-6603	C3	desert
TCGA-AZ-6605	C2	desert
TCGA-AZ-6608	C1	excluded
TCGA-CA-6715	C1	desert
TCGA-CA-6716	C1	desert
TCGA-CK-4948	C3	excluded
TCGA-CK-4950	C2	excluded
TCGA-CK-4951	C4	excluded
TCGA-CK-5914	C4	excluded
TCGA-CK-6746	C4	excluded
TCGA-CK-6748	C3	desert
TCGA-CK-6751	C4	desert
TCGA-CL-4957	C1	inflamed
TCGA-CL-5918	C1	desert
TCGA-CM-4744	C4	inflamed
TCGA-CM-4746	C1	excluded
TCGA-CM-4747	C3	desert
TCGA-CM-4752	C4	inflamed
TCGA-CM-5344	C3	inflamed
TCGA-CM-5348	C3	desert
TCGA-CM-5349	C3	desert
TCGA-CM-5860	C3	desert
TCGA-CM-5861	C1	desert
TCGA-CM-5864	C1	excluded
TCGA-CM-5868	C1	desert
TCGA-CM-6161	C4	inflamed
TCGA-CM-6163	C2	inflamed
TCGA-CM-6164	C3	desert
TCGA-CM-6165	C3	desert
TCGA-CM-6166	C1	desert
TCGA-CM-6167	C3	excluded
TCGA-CM-6168	C2	excluded
TCGA-CM-6169	C2	inflamed
TCGA-CM-6170	C3	desert
TCGA-CM-6172	C1	desert
TCGA-CM-6676	C1	desert
TCGA-CM-6677	C4	inflamed
TCGA-CM-6678	C1	desert
TCGA-CM-6679	C3	desert
TCGA-D5-5537	C1	desert
TCGA-D5-5540	C1	excluded
TCGA-D5-5541	C4	excluded
TCGA-D5-6529	C2	inflamed
TCGA-D5-6532	C1	excluded
TCGA-D5-6533	C4	desert
TCGA-D5-6535	C2	inflamed
TCGA-D5-6536	C3	excluded
TCGA-D5-6537	C1	excluded
TCGA-D5-6538	C1	desert
TCGA-D5-6540	C4	desert
TCGA-D5-6541	C2	inflamed
TCGA-DC-6158	C2	excluded
TCGA-DM-A1D7	C1	desert
TCGA-DM-A28F	C1	desert
TCGA-DY-A1DE	C1	desert
TCGA-EI-6508	C1	desert
TCGA-EI-6509	C1	desert
TCGA-EI-6510	C1	inflamed
TCGA-EI-6511	C4	inflamed
TCGA-EI-6512	C4	inflamed
TCGA-EI-6513	C1	desert
TCGA-EI-6514	C1	desert
TCGA-EI-6883	C1	inflamed
TCGA-F4-6460	C3	desert
TCGA-F4-6463	C3	desert
TCGA-F4-6569	C2	desert
TCGA-F4-6570	C2	excluded
TCGA-F4-6805	C3	desert
TCGA-F4-6807	C2	excluded
TCGA-F5-6571	C2	excluded
TCGA-G4-6293	C2	inflamed
TCGA-G4-6294	C1	desert
TCGA-G4-6295	C4	inflamed
TCGA-G4-6297	C3	excluded
TCGA-G4-6299	C2	excluded
TCGA-G4-6303	C3	desert
TCGA-G4-6306	C1	inflamed
TCGA-G4-6307	C1	desert
TCGA-G4-6309	C1	excluded
TCGA-G4-6310	C1	inflamed
TCGA-G4-6311	C3	excluded
TCGA-G4-6314	C3	excluded
TCGA-G4-6315	C1	excluded
TCGA-G4-6317	C1	desert
TCGA-G4-6320	C1	desert
TCGA-G4-6323	C1	inflamed
TCGA-G4-6586	C4	inflamed
TCGA-G4-6588	C4	excluded
TCGA-G4-6626	C1	inflamed
TCGA-G4-6627	C2	excluded
TCGA-G4-6628	C4	inflamed
TCGA-G5-6233	C1	inflamed
TCGA-AF-6136	C1	desert
TCGA-AG-3999	C1	desert
TCGA-AH-6643	C1	desert
TCGA-CK-6747	C1	desert
TCGA-CL-5917	C1	desert
TCGA-DC-4745	C1	desert
TCGA-DC-4749	C1	desert
TCGA-DC-6154	C1	desert
TCGA-DC-6157	C1	desert
TCGA-DC-6682	C1	desert
TCGA-DC-6683	C1	desert
TCGA-DY-A1DF	C1	desert
TCGA-G4-6322	C1	desert
TCGA-G5-6235	C1	excluded
TCGA-G5-6641	C1	excluded
TCGA-AA-3549	C2	excluded
TCGA-AG-3609	C2	inflamed
TCGA-F5-6465	C2	inflamed
TCGA-AF-6655	C3	excluded
TCGA-AH-6644	C3	excluded
TCGA-DC-6681	C3	excluded
TCGA-G5-6572	C3	excluded
TCGA-AG-3586	C4	inflamed
TCGA-CM-5341	C4	inflamed
TCGA-DC-5337	C4	inflamed
TCGA-DC-6160	C4	inflamed
