# Supplementary material for: Comprehensive characterization of tumor microenvironment in colorectal cancer via molecular analysis
Source: eLife. 2023 Jun 2;12:e86032. doi: 10.7554/eLife.86032 (PMC10238095; doi:10.7554/eLife.86032)
Supplement: Supplementary file 2. — (a) The different frequency of somatic mutations between the four CCCRC subtypes in TCGA-CRC dataset. The different frequency of somatic copy number alterations between the four CCCRC subtypes in TCGA-CRC dataset. (b) The fraction of altered samples per oncogenic pathway in each CCCRC subtype. (c) Lists of differentially expressed genes between each of the four subtypes and the remaining subtypes and between each subtype. (d) The correlation between all genes and the exclusion and dysfunction scores obtained from the Tumor Immune Dysfunction and Exclusion (TIDE) website. (e) Univariate cox analysis and Kaplan–Meier method showing the ability of 20 CCCRC genes to predict disease-free survival in the CRC-AFFY cohort. (f) A total of 7766T cells from 12 CRC patients in GSE108989 dataset. (g) The marker genes of the T cell clusters. [file elife-86032-supp2.xlsx]

## Sheet: Supplementary file 2a
Mutation gene	C1	C2	C3	C4	pvalue
CHD5_Mutated	5 ( 2.2%)	4 ( 3.5%)	2 ( 1.8%)	19 (15.4%)	3.06321e-07
SPEN_Mutated	4 ( 1.8%)	5 ( 4.4%)	2 ( 1.8%)	23 (18.7%)	4.39932e-10
UBR4_Mutated	5 ( 2.2%)	9 ( 8.0%)	3 ( 2.7%)	21 (17.1%)	6.19814e-07
HSPG2_Mutated	6 ( 2.7%)	3 ( 2.7%)	2 ( 1.8%)	18 (14.6%)	1.51002e-06
PTPRU_Mutated	7 ( 3.1%)	4 ( 3.5%)	4 ( 3.6%)	14 (11.4%)	0.00469284
MACF1_Mutated	6 ( 2.7%)	10 ( 8.8%)	7 ( 6.4%)	33 (26.8%)	7.38357e-12
LRRC7_Mutated	10 ( 4.4%)	5 ( 4.4%)	7 ( 6.4%)	20 (16.3%)	0.00031636
ABCA4_Mutated	9 ( 4.0%)	8 ( 7.1%)	1 ( 0.9%)	19 (15.4%)	2.1573e-05
NRAS_Mutated	22 (9.8%)	4 (3.5%)	3 (2.7%)	7 (5.7%)	0.0364312
HRNR_Mutated	13 (5.8%)	3 (2.7%)	4 (3.6%)	11 (8.9%)	0.145125
DENND4B_Mutated	6 ( 2.7%)	1 ( 0.9%)	5 ( 4.5%)	17 (13.8%)	7.85228e-06
ASH1L_Mutated	9 ( 4.0%)	9 ( 8.0%)	5 ( 4.5%)	26 (21.1%)	3.09824e-07
SPTA1_Mutated	11 ( 4.9%)	12 (10.6%)	9 ( 8.2%)	29 (23.6%)	1.33381e-06
ASPM_Mutated	10 ( 4.4%)	8 ( 7.1%)	6 ( 5.5%)	25 (20.3%)	3.25319e-06
NFASC_Mutated	7 ( 3.1%)	9 ( 8.0%)	4 ( 3.6%)	27 (22.0%)	5.00898e-09
PTPN14_Mutated	5 ( 2.2%)	5 ( 4.4%)	3 ( 2.7%)	18 (14.6%)	7.16972e-06
CENPF_Mutated	6 ( 2.7%)	7 ( 6.2%)	3 ( 2.7%)	21 (17.1%)	9.60935e-07
MIA3_Mutated	7 ( 3.1%)	2 ( 1.8%)	4 ( 3.6%)	18 (14.6%)	8.2966e-06
OBSCN_Mutated	31 (13.8%)	16 (14.2%)	11 (10.0%)	37 (30.1%)	8.90613e-05
MAP3K21_Mutated	9 (4.0%)	5 (4.4%)	4 (3.6%)	12 (9.8%)	0.0915192
LYST_Mutated	6 ( 2.7%)	10 ( 8.8%)	2 ( 1.8%)	15 (12.2%)	0.000359089
RYR2_Mutated	30 (13.3%)	24 (21.2%)	15 (13.6%)	40 (32.5%)	7.72154e-05
KIF26B_Mutated	7 ( 3.1%)	4 ( 3.5%)	7 ( 6.4%)	20 (16.3%)	1.87498e-05
TPO_Mutated	10 (4.4%)	3 (2.7%)	6 (5.5%)	10 (8.1%)	0.264431
PXDN_Mutated	13 ( 5.8%)	6 ( 5.3%)	5 ( 4.5%)	21 (17.1%)	0.00036344
NBAS_Mutated	7 ( 3.1%)	4 ( 3.5%)	2 ( 1.8%)	17 (13.8%)	3.19675e-05
APOB_Mutated	9 ( 4.0%)	9 ( 8.0%)	8 ( 7.3%)	22 (17.9%)	0.000151222
ALK_Mutated	10 ( 4.4%)	3 ( 2.7%)	2 ( 1.8%)	17 (13.8%)	9.99212e-05
SPTBN1_Mutated	6 (2.7%)	8 (7.1%)	7 (6.4%)	11 (8.9%)	0.076934
DYSF_Mutated	13 ( 5.8%)	7 ( 6.2%)	6 ( 5.5%)	23 (18.7%)	0.000133946
TET3_Mutated	4 ( 1.8%)	6 ( 5.3%)	3 ( 2.7%)	16 (13.0%)	5.38055e-05
DPP10_Mutated	8 ( 3.6%)	4 ( 3.5%)	4 ( 3.6%)	16 (13.0%)	0.00100949
CNTNAP5_Mutated	11 ( 4.9%)	9 ( 8.0%)	2 ( 1.8%)	18 (14.6%)	0.000631261
NEB_Mutated	18 ( 8.0%)	17 (15.0%)	12 (10.9%)	30 (24.4%)	0.000248404
LRP2_Mutated	17 ( 7.6%)	14 (12.4%)	7 ( 6.4%)	31 (25.2%)	4.26367e-06
TTN_Mutated	89 (39.6%)	53 (46.9%)	47 (42.7%)	70 (56.9%)	0.017769
ERBB4_Mutated	10 ( 4.4%)	15 (13.3%)	7 ( 6.4%)	20 (16.3%)	0.000746818
SPEG_Mutated	11 ( 4.9%)	5 ( 4.4%)	5 ( 4.5%)	22 (17.9%)	2.30223e-05
NYAP2_Mutated	10 (4.4%)	7 (6.2%)	6 (5.5%)	10 (8.1%)	0.563812
KIF1A_Mutated	12 ( 5.3%)	2 ( 1.8%)	1 ( 0.9%)	15 (12.2%)	0.000295773
GRM7_Mutated	8 (3.6%)	9 (8.0%)	5 (4.5%)	12 (9.8%)	0.0823912
TOP2B_Mutated	6 ( 2.7%)	2 ( 1.8%)	1 ( 0.9%)	20 (16.3%)	6.08464e-09
CTNNB1_Mutated	7 ( 3.1%)	5 ( 4.4%)	4 ( 3.6%)	18 (14.6%)	9.01813e-05
BSN_Mutated	9 ( 4.0%)	10 ( 8.8%)	9 ( 8.2%)	18 (14.6%)	0.00647891
DNAH1_Mutated	10 ( 4.4%)	8 ( 7.1%)	2 ( 1.8%)	27 (22.0%)	6.19511e-09
CACNA1D_Mutated	7 ( 3.1%)	5 ( 4.4%)	0 ( 0.0%)	17 (13.8%)	5.11091e-06
ROBO2_Mutated	18 ( 8.0%)	7 ( 6.2%)	7 ( 6.4%)	25 (20.3%)	0.000269047
KALRN_Mutated	7 ( 3.1%)	9 ( 8.0%)	8 ( 7.3%)	15 (12.2%)	0.0133645
PLXNA1_Mutated	4 ( 1.8%)	3 ( 2.7%)	3 ( 2.7%)	21 (17.1%)	4.92235e-09
PLXND1_Mutated	7 ( 3.1%)	7 ( 6.2%)	3 ( 2.7%)	16 (13.0%)	0.000829035
COL6A6_Mutated	13 ( 5.8%)	7 ( 6.2%)	4 ( 3.6%)	22 (17.9%)	0.000102662
EPHB1_Mutated	6 ( 2.7%)	3 ( 2.7%)	4 ( 3.6%)	16 (13.0%)	0.000126893
IGSF10_Mutated	7 ( 3.1%)	6 ( 5.3%)	5 ( 4.5%)	18 (14.6%)	0.000261113
EVC2_Mutated	7 ( 3.1%)	6 ( 5.3%)	3 ( 2.7%)	19 (15.4%)	1.99589e-05
BOD1L1_Mutated	10 ( 4.4%)	7 ( 6.2%)	3 ( 2.7%)	15 (12.2%)	0.0107467
FRAS1_Mutated	9 ( 4.0%)	7 ( 6.2%)	1 ( 0.9%)	27 (22.0%)	3.56357e-10
FAT4_Mutated	38 (16.9%)	24 (21.2%)	16 (14.5%)	46 (37.4%)	2.24742e-05
PCDH18_Mutated	11 ( 4.9%)	9 ( 8.0%)	2 ( 1.8%)	14 (11.4%)	0.0154072
FBXW7_Mutated	34 (15.1%)	15 (13.3%)	10 ( 9.1%)	33 (26.8%)	0.00157414
FSTL5_Mutated	8 (3.6%)	7 (6.2%)	4 (3.6%)	10 (8.1%)	0.238172
WDR17_Mutated	1 ( 0.4%)	8 ( 7.1%)	5 ( 4.5%)	16 (13.0%)	8.74517e-06
TENM3_Mutated	12 ( 5.3%)	11 ( 9.7%)	7 ( 6.4%)	25 (20.3%)	5.68888e-05
ICE1_Mutated	6 ( 2.7%)	6 ( 5.3%)	1 ( 0.9%)	20 (16.3%)	2.34491e-07
DNAH5_Mutated	21 ( 9.3%)	20 (17.7%)	11 (10.0%)	37 (30.1%)	1.91783e-06
PDZD2_Mutated	9 ( 4.0%)	11 ( 9.7%)	6 ( 5.5%)	20 (16.3%)	0.00052949
NIPBL_Mutated	10 ( 4.4%)	12 (10.6%)	3 ( 2.7%)	21 (17.1%)	4.70031e-05
PIK3R1_Mutated	7 ( 3.1%)	3 ( 2.7%)	3 ( 2.7%)	17 (13.8%)	3.74802e-05
DMXL1_Mutated	8 ( 3.6%)	6 ( 5.3%)	4 ( 3.6%)	20 (16.3%)	2.89995e-05
PCDHA3_Mutated	9 (4.0%)	7 (6.2%)	5 (4.5%)	10 (8.1%)	0.401129
PCDHA7_Mutated	6 ( 2.7%)	6 ( 5.3%)	4 ( 3.6%)	13 (10.6%)	0.0123151
PCDHA11_Mutated	9 ( 4.0%)	4 ( 3.5%)	4 ( 3.6%)	15 (12.2%)	0.00483471
PCDHA12_Mutated	13 ( 5.8%)	8 ( 7.1%)	4 ( 3.6%)	17 (13.8%)	0.0140143
TCERG1_Mutated	5 ( 2.2%)	5 ( 4.4%)	3 ( 2.7%)	21 (17.1%)	1.06896e-07
DOCK2_Mutated	8 ( 3.6%)	7 ( 6.2%)	5 ( 4.5%)	28 (22.8%)	2.91274e-09
ADAMTS2_Mutated	13 ( 5.8%)	8 ( 7.1%)	0 ( 0.0%)	18 (14.6%)	0.0001515
CUL9_Mutated	9 ( 4.0%)	4 ( 3.5%)	1 ( 0.9%)	20 (16.3%)	8.33822e-07
PKHD1_Mutated	9 ( 4.0%)	10 ( 8.8%)	8 ( 7.3%)	22 (17.9%)	0.000182788
DST_Mutated	18 ( 8.0%)	16 (14.2%)	5 ( 4.5%)	32 (26.0%)	6.67594e-07
RIMS1_Mutated	16 ( 7.1%)	11 ( 9.7%)	2 ( 1.8%)	23 (18.7%)	6.94576e-05
TTK_Mutated	8 ( 3.6%)	4 ( 3.5%)	1 ( 0.9%)	17 (13.8%)	2.18535e-05
MDN1_Mutated	13 ( 5.8%)	14 (12.4%)	8 ( 7.3%)	30 (24.4%)	1.68097e-06
GRIK2_Mutated	7 ( 3.1%)	10 ( 8.8%)	6 ( 5.5%)	23 (18.7%)	4.99754e-06
SOGA3_Mutated	4 ( 1.8%)	8 ( 7.1%)	0 ( 0.0%)	17 (13.8%)	6.96872e-07
LAMA2_Mutated	8 ( 3.6%)	10 ( 8.8%)	7 ( 6.4%)	25 (20.3%)	2.22817e-06
SHPRH_Mutated	5 ( 2.2%)	8 ( 7.1%)	2 ( 1.8%)	17 (13.8%)	2.48751e-05
SYNE1_Mutated	49 (21.8%)	31 (27.4%)	21 (19.1%)	51 (41.5%)	0.000186308
ARID1B_Mutated	4 ( 1.8%)	5 ( 4.4%)	1 ( 0.9%)	20 (16.3%)	1.22071e-08
FNDC1_Mutated	18 ( 8.0%)	6 ( 5.3%)	6 ( 5.5%)	19 (15.4%)	0.0154521
THSD7A_Mutated	8 ( 3.6%)	4 ( 3.5%)	9 ( 8.2%)	14 (11.4%)	0.0140272
HDAC9_Mutated	8 ( 3.6%)	6 ( 5.3%)	4 ( 3.6%)	16 (13.0%)	0.00243102
HECW1_Mutated	26 (11.6%)	5 ( 4.4%)	4 ( 3.6%)	19 (15.4%)	0.00289745
ABCA13_Mutated	19 ( 8.4%)	12 (10.6%)	11 (10.0%)	37 (30.1%)	1.18639e-07
MAGI2_Mutated	8 ( 3.6%)	3 ( 2.7%)	4 ( 3.6%)	14 (11.4%)	0.00448334
PTPRZ1_Mutated	8 ( 3.6%)	8 ( 7.1%)	7 ( 6.4%)	14 (11.4%)	0.0435476
KIAA1549_Mutated	6 ( 2.7%)	2 ( 1.8%)	3 ( 2.7%)	18 (14.6%)	1.49182e-06
CSMD1_Mutated	28 (12.4%)	17 (15.0%)	11 (10.0%)	32 (26.0%)	0.00217917
TEX15_Mutated	9 ( 4.0%)	9 ( 8.0%)	3 ( 2.7%)	22 (17.9%)	6.98868e-06
RP1_Mutated	16 ( 7.1%)	7 ( 6.2%)	4 ( 3.6%)	23 (18.7%)	0.000132515
CHD7_Mutated	7 ( 3.1%)	8 ( 7.1%)	4 ( 3.6%)	22 (17.9%)	2.44659e-06
PREX2_Mutated	8 ( 3.6%)	7 ( 6.2%)	2 ( 1.8%)	20 (16.3%)	7.31545e-06
ZFHX4_Mutated	25 (11.1%)	19 (16.8%)	13 (11.8%)	45 (36.6%)	1.5743e-08
VPS13B_Mutated	6 ( 2.7%)	15 (13.3%)	8 ( 7.3%)	28 (22.8%)	2.79203e-08
UBR5_Mutated	8 ( 3.6%)	6 ( 5.3%)	1 ( 0.9%)	21 (17.1%)	3.8466e-07
PKHD1L1_Mutated	5 ( 2.2%)	8 ( 7.1%)	4 ( 3.6%)	25 (20.3%)	5.62611e-09
CSMD3_Mutated	25 (11.1%)	18 (15.9%)	12 (10.9%)	42 (34.1%)	1.83124e-07
ADAMTSL1_Mutated	6 ( 2.7%)	4 ( 3.5%)	2 ( 1.8%)	20 (16.3%)	2.01795e-07
TRPM6_Mutated	7 ( 3.1%)	5 ( 4.4%)	4 ( 3.6%)	18 (14.6%)	9.01813e-05
PRUNE2_Mutated	6 ( 2.7%)	7 ( 6.2%)	3 ( 2.7%)	18 (14.6%)	4.14009e-05
VPS13A_Mutated	8 ( 3.6%)	5 ( 4.4%)	4 ( 3.6%)	23 (18.7%)	3.21927e-07
ABCA1_Mutated	11 ( 4.9%)	9 ( 8.0%)	3 ( 2.7%)	18 (14.6%)	0.00150253
COL27A1_Mutated	11 ( 4.9%)	9 ( 8.0%)	5 ( 4.5%)	18 (14.6%)	0.00557065
TNC_Mutated	9 ( 4.0%)	8 ( 7.1%)	4 ( 3.6%)	24 (19.5%)	1.1267e-06
ABCA2_Mutated	9 (4.0%)	7 (6.2%)	4 (3.6%)	11 (8.9%)	0.197558
LARP4B_Mutated	7 ( 3.1%)	4 ( 3.5%)	1 ( 0.9%)	20 (16.3%)	1.52459e-07
CUBN_Mutated	11 ( 4.9%)	10 ( 8.8%)	4 ( 3.6%)	26 (21.1%)	9.1616e-07
GPR158_Mutated	7 ( 3.1%)	8 ( 7.1%)	4 ( 3.6%)	17 (13.8%)	0.000677526
SVIL_Mutated	7 ( 3.1%)	6 ( 5.3%)	4 ( 3.6%)	22 (17.9%)	9.87629e-07
PCDH15_Mutated	16 ( 7.1%)	14 (12.4%)	6 ( 5.5%)	25 (20.3%)	0.000348555
TET1_Mutated	10 (4.4%)	11 (9.7%)	1 (0.9%)	11 (8.9%)	0.0115382
TNKS2_Mutated	5 ( 2.2%)	6 ( 5.3%)	1 ( 0.9%)	18 (14.6%)	1.33541e-06
DOCK1_Mutated	7 ( 3.1%)	6 ( 5.3%)	1 ( 0.9%)	15 (12.2%)	0.000314226
MUC5B_Mutated	13 ( 5.8%)	9 ( 8.0%)	6 ( 5.5%)	32 (26.0%)	8.04271e-09
DCHS1_Mutated	10 ( 4.4%)	6 ( 5.3%)	5 ( 4.5%)	25 (20.3%)	5.38763e-07
CCDC73_Mutated	4 ( 1.8%)	6 ( 5.3%)	5 ( 4.5%)	16 (13.0%)	0.000189075
AHNAK_Mutated	11 ( 4.9%)	8 ( 7.1%)	4 ( 3.6%)	23 (18.7%)	1.61721e-05
NRXN2_Mutated	8 ( 3.6%)	4 ( 3.5%)	7 ( 6.4%)	20 (16.3%)	4.15744e-05
DLG2_Mutated	8 ( 3.6%)	7 ( 6.2%)	6 ( 5.5%)	16 (13.0%)	0.00727646
CNTN5_Mutated	7 ( 3.1%)	7 ( 6.2%)	2 ( 1.8%)	13 (10.6%)	0.00667987
ATM_Mutated	17 ( 7.6%)	9 ( 8.0%)	8 ( 7.3%)	31 (25.2%)	1.59018e-06
DSCAML1_Mutated	8 ( 3.6%)	10 ( 8.8%)	5 ( 4.5%)	26 (21.1%)	1.74597e-07
BCL9L_Mutated	12 ( 5.3%)	11 ( 9.7%)	3 ( 2.7%)	20 (16.3%)	0.000424336
CDON_Mutated	3 ( 1.3%)	6 ( 5.3%)	4 ( 3.6%)	16 (13.0%)	3.89281e-05
VWF_Mutated	13 ( 5.8%)	10 ( 8.8%)	4 ( 3.6%)	20 (16.3%)	0.00148953
ARID2_Mutated	5 ( 2.2%)	10 ( 8.8%)	4 ( 3.6%)	16 (13.0%)	0.000311501
LRP1_Mutated	11 ( 4.9%)	8 ( 7.1%)	3 ( 2.7%)	29 (23.6%)	2.93656e-09
MBD6_Mutated	8 ( 3.6%)	6 ( 5.3%)	5 ( 4.5%)	21 (17.1%)	1.72584e-05
HECTD4_Mutated	11 ( 4.9%)	6 ( 5.3%)	9 ( 8.2%)	26 (21.1%)	2.95346e-06
NOS1_Mutated	13 ( 5.8%)	3 ( 2.7%)	5 ( 4.5%)	19 (15.4%)	0.000384971
GCN1_Mutated	5 ( 2.2%)	6 ( 5.3%)	5 ( 4.5%)	19 (15.4%)	1.44288e-05
NCOR2_Mutated	5 ( 2.2%)	4 ( 3.5%)	2 ( 1.8%)	19 (15.4%)	3.06321e-07
SACS_Mutated	17 ( 7.6%)	10 ( 8.8%)	9 ( 8.2%)	32 (26.0%)	1.47436e-06
ATP8A2_Mutated	2 ( 0.9%)	7 ( 6.2%)	4 ( 3.6%)	17 (13.8%)	4.56438e-06
FRY_Mutated	10 ( 4.4%)	6 ( 5.3%)	6 ( 5.5%)	29 (23.6%)	5.21712e-09
BRCA2_Mutated	8 ( 3.6%)	6 ( 5.3%)	5 ( 4.5%)	22 (17.9%)	5.02711e-06
NBEA_Mutated	12 ( 5.3%)	8 ( 7.1%)	14 (12.7%)	28 (22.8%)	5.41538e-06
PCDH17_Mutated	17 ( 7.6%)	14 (12.4%)	4 ( 3.6%)	23 (18.7%)	0.000629119
MYCBP2_Mutated	11 ( 4.9%)	10 ( 8.8%)	3 ( 2.7%)	30 (24.4%)	2.04042e-09
NALCN_Mutated	16 ( 7.1%)	8 ( 7.1%)	4 ( 3.6%)	24 (19.5%)	7.49787e-05
ARHGAP5_Mutated	9 ( 4.0%)	4 ( 3.5%)	1 ( 0.9%)	15 (12.2%)	0.000442712
SPTB_Mutated	6 ( 2.7%)	6 ( 5.3%)	3 ( 2.7%)	22 (17.9%)	1.46733e-07
MIDEAS_Mutated	4 ( 1.8%)	6 ( 5.3%)	3 ( 2.7%)	20 (16.3%)	2.70868e-07
RYR3_Mutated	18 ( 8.0%)	18 (15.9%)	12 (10.9%)	33 (26.8%)	1.98615e-05
MYO5A_Mutated	15 (6.7%)	3 (2.7%)	4 (3.6%)	12 (9.8%)	0.0846476
HERC1_Mutated	7 ( 3.1%)	7 ( 6.2%)	4 ( 3.6%)	20 (16.3%)	1.99428e-05
MINAR1_Mutated	8 ( 3.6%)	4 ( 3.5%)	1 ( 0.9%)	22 (17.9%)	2.04389e-08
ACAN_Mutated	7 ( 3.1%)	6 ( 5.3%)	3 ( 2.7%)	15 (12.2%)	0.00191424
LRRK1_Mutated	6 ( 2.7%)	7 ( 6.2%)	3 ( 2.7%)	14 (11.4%)	0.00302074
PKD1_Mutated	8 ( 3.6%)	3 ( 2.7%)	3 ( 2.7%)	17 (13.8%)	7.64849e-05
MYH11_Mutated	6 ( 2.7%)	7 ( 6.2%)	3 ( 2.7%)	15 (12.2%)	0.00113179
DNAH3_Mutated	9 ( 4.0%)	8 ( 7.1%)	4 ( 3.6%)	32 (26.0%)	1.68209e-11
HYDIN_Mutated	22 ( 9.8%)	12 (10.6%)	7 ( 6.4%)	25 (20.3%)	0.00475359
ZFHX3_Mutated	10 ( 4.4%)	11 ( 9.7%)	5 ( 4.5%)	25 (20.3%)	3.82828e-06
DNAH2_Mutated	6 ( 2.7%)	12 (10.6%)	4 ( 3.6%)	32 (26.0%)	4.12836e-12
CHD3_Mutated	4 ( 1.8%)	5 ( 4.4%)	5 ( 4.5%)	17 (13.8%)	3.84275e-05
MYH8_Mutated	3 ( 1.3%)	4 ( 3.5%)	3 ( 2.7%)	25 (20.3%)	5.10471e-12
MYH2_Mutated	8 ( 3.6%)	6 ( 5.3%)	6 ( 5.5%)	17 (13.8%)	0.00223377
NCOR1_Mutated	1 ( 0.4%)	7 ( 6.2%)	3 ( 2.7%)	20 (16.3%)	7.6257e-09
MYO15A_Mutated	10 ( 4.4%)	6 ( 5.3%)	3 ( 2.7%)	22 (17.9%)	4.52419e-06
NF1_Mutated	6 ( 2.7%)	6 ( 5.3%)	2 ( 1.8%)	19 (15.4%)	3.09471e-06
SCN4A_Mutated	7 ( 3.1%)	6 ( 5.3%)	3 ( 2.7%)	18 (14.6%)	6.76014e-05
RNF213_Mutated	9 ( 4.0%)	12 (10.6%)	3 ( 2.7%)	29 (23.6%)	2.27764e-09
PTPRM_Mutated	8 ( 3.6%)	5 ( 4.4%)	4 ( 3.6%)	15 (12.2%)	0.0046635
EPG5_Mutated	9 ( 4.0%)	7 ( 6.2%)	2 ( 1.8%)	19 (15.4%)	4.97666e-05
C3_Mutated	3 ( 1.3%)	5 ( 4.4%)	1 ( 0.9%)	20 (16.3%)	3.12206e-09
FBN3_Mutated	13 ( 5.8%)	7 ( 6.2%)	7 ( 6.4%)	19 (15.4%)	0.00887818
CACNA1A_Mutated	7 ( 3.1%)	5 ( 4.4%)	4 ( 3.6%)	28 (22.8%)	7.35892e-11
CPAMD8_Mutated	4 ( 1.8%)	5 ( 4.4%)	4 ( 3.6%)	17 (13.8%)	2.12957e-05
KMT2B_Mutated	16 ( 7.1%)	6 ( 5.3%)	4 ( 3.6%)	31 (25.2%)	5.24564e-09
RYR1_Mutated	25 (11.1%)	14 (12.4%)	8 ( 7.3%)	31 (25.2%)	0.000261287
FCGBP_Mutated	12 ( 5.3%)	10 ( 8.8%)	5 ( 4.5%)	24 (19.5%)	3.82533e-05
CIC_Mutated	3 ( 1.3%)	6 ( 5.3%)	1 ( 0.9%)	19 (15.4%)	2.88858e-08
MYH14_Mutated	7 ( 3.1%)	3 ( 2.7%)	2 ( 1.8%)	21 (17.1%)	4.71802e-08
SYCP2_Mutated	6 ( 2.7%)	9 ( 8.0%)	2 ( 1.8%)	16 (13.0%)	0.000172392
HELZ2_Mutated	7 ( 3.1%)	2 ( 1.8%)	4 ( 3.6%)	16 (13.0%)	0.000110964
MYO18B_Mutated	7 ( 3.1%)	11 ( 9.7%)	4 ( 3.6%)	21 (17.1%)	1.1682e-05
TCF20_Mutated	8 ( 3.6%)	6 ( 5.3%)	0 ( 0.0%)	17 (13.8%)	1.76013e-05
PKDREJ_Mutated	8 ( 3.6%)	5 ( 4.4%)	5 ( 4.5%)	17 (13.8%)	0.000989777
CELSR1_Mutated	9 ( 4.0%)	6 ( 5.3%)	3 ( 2.7%)	21 (17.1%)	7.74446e-06
MXRA5_Mutated	13 ( 5.8%)	14 (12.4%)	3 ( 2.7%)	24 (19.5%)	1.51944e-05
DMD_Mutated	24 (10.7%)	15 (13.3%)	4 ( 3.6%)	20 (16.3%)	0.0172238
FAM47C_Mutated	11 ( 4.9%)	8 ( 7.1%)	3 ( 2.7%)	16 (13.0%)	0.00778398
HUWE1_Mutated	10 ( 4.4%)	6 ( 5.3%)	4 ( 3.6%)	20 (16.3%)	0.00011299
WNK3_Mutated	9 (4.0%)	7 (6.2%)	2 (1.8%)	12 (9.8%)	0.0362628
PCDH19_Mutated	6 ( 2.7%)	7 ( 6.2%)	3 ( 2.7%)	18 (14.6%)	4.14009e-05
MAGEC1_Mutated	15 ( 6.7%)	8 ( 7.1%)	6 ( 5.5%)	13 (10.6%)	0.454578
PCDHA8_Mutated	6 ( 2.7%)	6 ( 5.3%)	5 ( 4.5%)	16 (13.0%)	0.00105135
ZNF536_Mutated	10 ( 4.4%)	13 (11.5%)	7 ( 6.4%)	20 (16.3%)	0.00126973
COL11A1_Mutated	11 ( 4.9%)	10 ( 8.8%)	4 ( 3.6%)	23 (18.7%)	2.72511e-05
BRINP3_Mutated	10 (4.4%)	8 (7.1%)	2 (1.8%)	12 (9.8%)	0.045485
USH2A_Mutated	20 ( 8.9%)	17 (15.0%)	12 (10.9%)	32 (26.0%)	0.000142526
ZDBF2_Mutated	13 ( 5.8%)	7 ( 6.2%)	5 ( 4.5%)	23 (18.7%)	7.21135e-05
MAP2_Mutated	9 ( 4.0%)	9 ( 8.0%)	4 ( 3.6%)	23 (18.7%)	5.27484e-06
PIK3CA_Mutated	57 (25.3%)	31 (27.4%)	20 (18.2%)	37 (30.1%)	0.195536
APC_Mutated	193 (85.8%)	72 (63.7%)	81 (73.6%)	75 (61.0%)	3.15556e-07
PCDHGA8_Mutated	9 ( 4.0%)	6 ( 5.3%)	1 ( 0.9%)	14 (11.4%)	0.00269227
LPA_Mutated	12 ( 5.3%)	3 ( 2.7%)	9 ( 8.2%)	13 (10.6%)	0.0676843
RELN_Mutated	15 ( 6.7%)	10 ( 8.8%)	7 ( 6.4%)	19 (15.4%)	0.0330844
ANK1_Mutated	5 ( 2.2%)	7 ( 6.2%)	4 ( 3.6%)	16 (13.0%)	0.000348469
KRAS_Mutated	105 (46.7%)	48 (42.5%)	51 (46.4%)	36 (29.3%)	0.0113844
FREM2_Mutated	13 ( 5.8%)	11 ( 9.7%)	7 ( 6.4%)	22 (17.9%)	0.00162616
PCDH9_Mutated	14 ( 6.2%)	11 ( 9.7%)	9 ( 8.2%)	19 (15.4%)	0.0413148
YLPM1_Mutated	8 ( 3.6%)	4 ( 3.5%)	1 ( 0.9%)	22 (17.9%)	2.04389e-08
CREBBP_Mutated	12 ( 5.3%)	9 ( 8.0%)	3 ( 2.7%)	23 (18.7%)	1.72752e-05
TSHZ3_Mutated	15 ( 6.7%)	8 ( 7.1%)	4 ( 3.6%)	23 (18.7%)	0.000136564
TENM1_Mutated	16 ( 7.1%)	8 ( 7.1%)	6 ( 5.5%)	23 (18.7%)	0.000784978
CHL1_Mutated	8 (3.6%)	7 (6.2%)	2 (1.8%)	12 (9.8%)	0.0246158
ARAP2_Mutated	8 ( 3.6%)	5 ( 4.4%)	3 ( 2.7%)	18 (14.6%)	8.78761e-05
ANK2_Mutated	17 ( 7.6%)	18 (15.9%)	3 ( 2.7%)	23 (18.7%)	9.81773e-05
KCNB2_Mutated	14 ( 6.2%)	5 ( 4.4%)	6 ( 5.5%)	15 (12.2%)	0.0765518
PLEC_Mutated	9 ( 4.0%)	9 ( 8.0%)	4 ( 3.6%)	16 (13.0%)	0.00593386
FREM1_Mutated	5 ( 2.2%)	6 ( 5.3%)	1 ( 0.9%)	17 (13.8%)	5.12273e-06
PAPPA_Mutated	14 ( 6.2%)	3 ( 2.7%)	3 ( 2.7%)	19 (15.4%)	0.000134454
KCNA4_Mutated	9 ( 4.0%)	7 ( 6.2%)	3 ( 2.7%)	17 (13.8%)	0.00104536
TENM4_Mutated	11 ( 4.9%)	6 ( 5.3%)	3 ( 2.7%)	15 (12.2%)	0.0127892
FAT3_Mutated	28 (12.4%)	12 (10.6%)	10 ( 9.1%)	31 (25.2%)	0.000960539
TECTA_Mutated	10 ( 4.4%)	9 ( 8.0%)	5 ( 4.5%)	22 (17.9%)	7.04214e-05
CACNA1H_Mutated	13 ( 5.8%)	7 ( 6.2%)	4 ( 3.6%)	19 (15.4%)	0.00204528
TP53_Mutated	146 (64.9%)	64 (56.6%)	71 (64.5%)	57 (46.3%)	0.00454518
NCAM2_Mutated	7 ( 3.1%)	3 ( 2.7%)	4 ( 3.6%)	17 (13.8%)	7.8677e-05
NEXMIF_Mutated	10 ( 4.4%)	4 ( 3.5%)	4 ( 3.6%)	16 (13.0%)	0.00280278
ADGRL2_Mutated	8 ( 3.6%)	7 ( 6.2%)	5 ( 4.5%)	18 (14.6%)	0.000736788
CFH_Mutated	8 ( 3.6%)	6 ( 5.3%)	0 ( 0.0%)	18 (14.6%)	5.11102e-06
LRP1B_Mutated	30 (13.3%)	22 (19.5%)	10 ( 9.1%)	33 (26.8%)	0.00105494
XIRP2_Mutated	16 ( 7.1%)	14 (12.4%)	6 ( 5.5%)	27 (22.0%)	6.0353e-05
DNAH7_Mutated	12 ( 5.3%)	8 ( 7.1%)	8 ( 7.3%)	26 (21.1%)	1.2567e-05
TRIP12_Mutated	5 ( 2.2%)	9 ( 8.0%)	1 ( 0.9%)	18 (14.6%)	2.56236e-06
EPHA3_Mutated	9 ( 4.0%)	5 ( 4.4%)	2 ( 1.8%)	17 (13.8%)	0.000218919
DNAH8_Mutated	13 ( 5.8%)	15 (13.3%)	8 ( 7.3%)	25 (20.3%)	0.000187225
SDK1_Mutated	15 ( 6.7%)	10 ( 8.8%)	14 (12.7%)	25 (20.3%)	0.00123295
DNAH11_Mutated	20 ( 8.9%)	22 (19.5%)	10 ( 9.1%)	32 (26.0%)	3.30706e-05
ABCB1_Mutated	4 ( 1.8%)	5 ( 4.4%)	4 ( 3.6%)	17 (13.8%)	2.12957e-05
RIMS2_Mutated	12 ( 5.3%)	10 ( 8.8%)	6 ( 5.5%)	18 (14.6%)	0.0145016
MYO3A_Mutated	14 ( 6.2%)	9 ( 8.0%)	4 ( 3.6%)	17 (13.8%)	0.0209479
FASN_Mutated	10 ( 4.4%)	4 ( 3.5%)	2 ( 1.8%)	15 (12.2%)	0.00184164
PTPRS_Mutated	9 ( 4.0%)	4 ( 3.5%)	7 ( 6.4%)	19 (15.4%)	0.000255265
MUC16_Mutated	48 (21.3%)	32 (28.3%)	21 (19.1%)	47 (38.2%)	0.00169026
PEG3_Mutated	13 ( 5.8%)	6 ( 5.3%)	3 ( 2.7%)	19 (15.4%)	0.000660613
PTPRT_Mutated	16 ( 7.1%)	9 ( 8.0%)	5 ( 4.5%)	22 (17.9%)	0.00144986
ROBO1_Mutated	14 ( 6.2%)	11 ( 9.7%)	4 ( 3.6%)	18 (14.6%)	0.0102537
PCLO_Mutated	24 (10.7%)	19 (16.8%)	7 ( 6.4%)	34 (27.6%)	1.03364e-05
SVEP1_Mutated	12 ( 5.3%)	7 ( 6.2%)	5 ( 4.5%)	14 (11.4%)	0.117409
CACNA1C_Mutated	5 ( 2.2%)	9 ( 8.0%)	1 ( 0.9%)	20 (16.3%)	2.20422e-07
SLITRK1_Mutated	9 (4.0%)	10 (8.8%)	6 (5.5%)	11 (8.9%)	0.183425
HERC2_Mutated	13 ( 5.8%)	12 (10.6%)	3 ( 2.7%)	29 (23.6%)	6.7306e-08
CDH8_Mutated	7 ( 3.1%)	8 ( 7.1%)	4 ( 3.6%)	13 (10.6%)	0.021836
ZNF521_Mutated	7 ( 3.1%)	4 ( 3.5%)	4 ( 3.6%)	16 (13.0%)	0.000534406
TSHZ2_Mutated	5 ( 2.2%)	9 ( 8.0%)	3 ( 2.7%)	14 (11.4%)	0.00114725
MED12_Mutated	6 ( 2.7%)	8 ( 7.1%)	5 ( 4.5%)	16 (13.0%)	0.00146246
CSMD2_Mutated	13 ( 5.8%)	16 (14.2%)	9 ( 8.2%)	28 (22.8%)	2.02343e-05
DOCK3_Mutated	15 ( 6.7%)	12 (10.6%)	4 ( 3.6%)	35 (28.5%)	4.50654e-10
KCNQ5_Mutated	5 ( 2.2%)	7 ( 6.2%)	2 ( 1.8%)	15 (12.2%)	0.000220959
CARD11_Mutated	8 ( 3.6%)	8 ( 7.1%)	5 ( 4.5%)	16 (13.0%)	0.00566063
MYO16_Mutated	10 ( 4.4%)	7 ( 6.2%)	2 ( 1.8%)	18 (14.6%)	0.000274174
CACNA1F_Mutated	5 ( 2.2%)	7 ( 6.2%)	2 ( 1.8%)	16 (13.0%)	7.10754e-05
CTNNA2_Mutated	10 ( 4.4%)	7 ( 6.2%)	4 ( 3.6%)	20 (16.3%)	0.000171402
LAMA4_Mutated	7 ( 3.1%)	8 ( 7.1%)	5 ( 4.5%)	13 (10.6%)	0.0323297
VWA8_Mutated	5 ( 2.2%)	3 ( 2.7%)	5 ( 4.5%)	16 (13.0%)	9.15372e-05
MAP1A_Mutated	9 ( 4.0%)	4 ( 3.5%)	3 ( 2.7%)	20 (16.3%)	7.47407e-06
NRXN1_Mutated	18 ( 8.0%)	7 ( 6.2%)	5 ( 4.5%)	22 (17.9%)	0.00130089
WDFY3_Mutated	7 ( 3.1%)	8 ( 7.1%)	5 ( 4.5%)	13 (10.6%)	0.0323297
GLI3_Mutated	14 ( 6.2%)	9 ( 8.0%)	4 ( 3.6%)	22 (17.9%)	0.000322287
IGSF9B_Mutated	12 ( 5.3%)	6 ( 5.3%)	4 ( 3.6%)	18 (14.6%)	0.00244336
CHD4_Mutated	10 ( 4.4%)	7 ( 6.2%)	2 ( 1.8%)	18 (14.6%)	0.000274174
GRIN2A_Mutated	13 ( 5.8%)	8 ( 7.1%)	4 ( 3.6%)	21 (17.1%)	0.000414503
SMAD4_Mutated	29 (12.9%)	13 (11.5%)	11 (10.0%)	16 (13.0%)	0.868137
SHANK1_Mutated	9 ( 4.0%)	5 ( 4.4%)	3 ( 2.7%)	14 (11.4%)	0.0108377
ZNF831_Mutated	9 ( 4.0%)	7 ( 6.2%)	7 ( 6.4%)	22 (17.9%)	5.33444e-05
AMER1_Mutated	24 (10.7%)	15 (13.3%)	9 ( 8.2%)	21 (17.1%)	0.169274
TNR_Mutated	16 ( 7.1%)	9 ( 8.0%)	5 ( 4.5%)	15 (12.2%)	0.170059
SCN11A_Mutated	6 ( 2.7%)	14 (12.4%)	4 ( 3.6%)	18 (14.6%)	3.57077e-05
FRYL_Mutated	11 ( 4.9%)	9 ( 8.0%)	6 ( 5.5%)	21 (17.1%)	0.000645483
CMYA5_Mutated	10 ( 4.4%)	7 ( 6.2%)	5 ( 4.5%)	23 (18.7%)	1.1471e-05
TCF7L2_Mutated	15 ( 6.7%)	10 ( 8.8%)	12 (10.9%)	15 (12.2%)	0.323828
TRPC4_Mutated	9 ( 4.0%)	6 ( 5.3%)	7 ( 6.4%)	15 (12.2%)	0.027102
NRK_Mutated	12 (5.3%)	7 (6.2%)	4 (3.6%)	8 (6.5%)	0.777458
ERICH3_Mutated	6 ( 2.7%)	10 ( 8.8%)	3 ( 2.7%)	17 (13.8%)	0.000138445
CDH12_Mutated	5 ( 2.2%)	3 ( 2.7%)	5 ( 4.5%)	17 (13.8%)	2.57777e-05
GRIA1_Mutated	8 (3.6%)	7 (6.2%)	4 (3.6%)	12 (9.8%)	0.077137
UTRN_Mutated	5 ( 2.2%)	7 ( 6.2%)	4 ( 3.6%)	22 (17.9%)	2.2429e-07
RGS22_Mutated	3 ( 1.3%)	6 ( 5.3%)	1 ( 0.9%)	19 (15.4%)	2.88858e-08
DOCK8_Mutated	7 ( 3.1%)	5 ( 4.4%)	4 ( 3.6%)	17 (13.8%)	0.000292506
DAPK1_Mutated	10 ( 4.4%)	5 ( 4.4%)	2 ( 1.8%)	17 (13.8%)	0.000373927
SFMBT2_Mutated	10 ( 4.4%)	3 ( 2.7%)	3 ( 2.7%)	17 (13.8%)	0.000242507
KIAA1217_Mutated	3 ( 1.3%)	6 ( 5.3%)	4 ( 3.6%)	20 (16.3%)	2.02627e-07
TMEM132D_Mutated	12 ( 5.3%)	9 ( 8.0%)	6 ( 5.5%)	21 (17.1%)	0.00111685
DMXL2_Mutated	4 ( 1.8%)	9 ( 8.0%)	2 ( 1.8%)	21 (17.1%)	6.70822e-08
KANSL1_Mutated	5 ( 2.2%)	5 ( 4.4%)	6 ( 5.5%)	22 (17.9%)	2.84878e-07
SMAD2_Mutated	10 (4.4%)	5 (4.4%)	7 (6.4%)	7 (5.7%)	0.858916
DCC_Mutated	9 ( 4.0%)	6 ( 5.3%)	6 ( 5.5%)	19 (15.4%)	0.000563051
DSEL_Mutated	8 ( 3.6%)	11 ( 9.7%)	3 ( 2.7%)	19 (15.4%)	8.58301e-05
TRPS1_Mutated	14 ( 6.2%)	10 ( 8.8%)	10 ( 9.1%)	27 (22.0%)	7.35219e-05
NAV3_Mutated	11 ( 4.9%)	8 ( 7.1%)	8 ( 7.3%)	24 (19.5%)	5.65431e-05
THSD7B_Mutated	10 ( 4.4%)	7 ( 6.2%)	3 ( 2.7%)	18 (14.6%)	0.000659452
SCN1A_Mutated	11 ( 4.9%)	9 ( 8.0%)	4 ( 3.6%)	20 (16.3%)	0.000498066
COL5A1_Mutated	10 ( 4.4%)	11 ( 9.7%)	4 ( 3.6%)	19 (15.4%)	0.000725461
LRRK2_Mutated	11 ( 4.9%)	8 ( 7.1%)	8 ( 7.3%)	25 (20.3%)	1.92196e-05
SALL1_Mutated	9 ( 4.0%)	5 ( 4.4%)	3 ( 2.7%)	17 (13.8%)	0.000520452
AXIN2_Mutated	11 ( 4.9%)	3 ( 2.7%)	3 ( 2.7%)	14 (11.4%)	0.00782211
SOX9_Mutated	28 (12.4%)	14 (12.4%)	11 (10.0%)	18 (14.6%)	0.766084
VPS13D_Mutated	6 ( 2.7%)	2 ( 1.8%)	4 ( 3.6%)	21 (17.1%)	4.42903e-08
FLG_Mutated	23 (10.2%)	13 (11.5%)	8 ( 7.3%)	24 (19.5%)	0.0216929
HMCN1_Mutated	12 ( 5.3%)	14 (12.4%)	7 ( 6.4%)	31 (25.2%)	1.36751e-07
PCDHA4_Mutated	6 ( 2.7%)	7 ( 6.2%)	4 ( 3.6%)	13 (10.6%)	0.012945
STAB2_Mutated	7 ( 3.1%)	4 ( 3.5%)	3 ( 2.7%)	18 (14.6%)	2.2326e-05
ATRX_Mutated	8 ( 3.6%)	4 ( 3.5%)	7 ( 6.4%)	20 (16.3%)	4.15744e-05
SCN2A_Mutated	7 ( 3.1%)	4 ( 3.5%)	3 ( 2.7%)	22 (17.9%)	8.84149e-08
SCN7A_Mutated	9 ( 4.0%)	10 ( 8.8%)	4 ( 3.6%)	17 (13.8%)	0.00241155
COL4A4_Mutated	8 ( 3.6%)	5 ( 4.4%)	4 ( 3.6%)	14 (11.4%)	0.0120627
ADCY2_Mutated	6 ( 2.7%)	6 ( 5.3%)	6 ( 5.5%)	15 (12.2%)	0.0039043
ADAMTS20_Mutated	9 ( 4.0%)	6 ( 5.3%)	4 ( 3.6%)	18 (14.6%)	0.000557025
RIMBP2_Mutated	7 ( 3.1%)	10 ( 8.8%)	3 ( 2.7%)	16 (13.0%)	0.000754021
ATP10A_Mutated	10 ( 4.4%)	6 ( 5.3%)	8 ( 7.3%)	25 (20.3%)	3.12049e-06
FBN1_Mutated	12 ( 5.3%)	12 (10.6%)	3 ( 2.7%)	18 (14.6%)	0.00187746
PCDH11X_Mutated	18 ( 8.0%)	6 ( 5.3%)	9 ( 8.2%)	16 (13.0%)	0.192384
MTOR_Mutated	12 ( 5.3%)	7 ( 6.2%)	2 ( 1.8%)	19 (15.4%)	0.000263412
ARID1A_Mutated	11 ( 4.9%)	11 ( 9.7%)	9 ( 8.2%)	34 (27.6%)	2.38692e-09
CELSR2_Mutated	6 ( 2.7%)	7 ( 6.2%)	3 ( 2.7%)	16 (13.0%)	0.000397843
BCL9_Mutated	13 ( 5.8%)	8 ( 7.1%)	5 ( 4.5%)	19 (15.4%)	0.00495916
CACNA1E_Mutated	20 ( 8.9%)	17 (15.0%)	9 ( 8.2%)	24 (19.5%)	0.0122415
DISP1_Mutated	10 (4.4%)	5 (4.4%)	2 (1.8%)	12 (9.8%)	0.0402801
FMN2_Mutated	9 ( 4.0%)	8 ( 7.1%)	3 ( 2.7%)	19 (15.4%)	0.000161451
CEP170_Mutated	5 ( 2.2%)	6 ( 5.3%)	5 ( 4.5%)	18 (14.6%)	4.85025e-05
MSH6_Mutated	4 ( 1.8%)	8 ( 7.1%)	2 ( 1.8%)	15 (12.2%)	8.81629e-05
USP34_Mutated	9 ( 4.0%)	8 ( 7.1%)	5 ( 4.5%)	17 (13.8%)	0.00423921
NCKAP5_Mutated	11 ( 4.9%)	10 ( 8.8%)	3 ( 2.7%)	14 (11.4%)	0.0272131
ACVR2A_Mutated	12 ( 5.3%)	9 ( 8.0%)	4 ( 3.6%)	30 (24.4%)	8.5213e-09
SCN9A_Mutated	9 ( 4.0%)	7 ( 6.2%)	9 ( 8.2%)	20 (16.3%)	0.000700113
FSIP2_Mutated	6 ( 2.7%)	3 ( 2.7%)	3 ( 2.7%)	17 (13.8%)	1.65606e-05
BMPR2_Mutated	10 ( 4.4%)	10 ( 8.8%)	3 ( 2.7%)	28 (22.8%)	1.22717e-08
PIKFYVE_Mutated	4 ( 1.8%)	6 ( 5.3%)	2 ( 1.8%)	17 (13.8%)	5.81914e-06
TNS1_Mutated	10 ( 4.4%)	7 ( 6.2%)	4 ( 3.6%)	17 (13.8%)	0.00351986
SPHKAP_Mutated	11 ( 4.9%)	8 ( 7.1%)	4 ( 3.6%)	13 (10.6%)	0.112063
COL6A3_Mutated	17 ( 7.6%)	11 ( 9.7%)	8 ( 7.3%)	21 (17.1%)	0.0259863
NBEAL2_Mutated	5 ( 2.2%)	7 ( 6.2%)	2 ( 1.8%)	17 (13.8%)	2.16156e-05
COL7A1_Mutated	12 ( 5.3%)	11 ( 9.7%)	1 ( 0.9%)	18 (14.6%)	0.000337193
STAB1_Mutated	6 ( 2.7%)	5 ( 4.4%)	2 ( 1.8%)	21 (17.1%)	1.03753e-07
CACNA2D3_Mutated	8 ( 3.6%)	2 ( 1.8%)	5 ( 4.5%)	16 (13.0%)	0.000361407
CADPS_Mutated	7 ( 3.1%)	6 ( 5.3%)	5 ( 4.5%)	16 (13.0%)	0.002141
ADAMTS9_Mutated	7 ( 3.1%)	3 ( 2.7%)	4 ( 3.6%)	18 (14.6%)	2.19857e-05
ZBTB20_Mutated	4 ( 1.8%)	7 ( 6.2%)	2 ( 1.8%)	23 (18.7%)	1.88673e-09
MECOM_Mutated	5 ( 2.2%)	4 ( 3.5%)	3 ( 2.7%)	18 (14.6%)	3.6791e-06
ADGRL3_Mutated	8 ( 3.6%)	8 ( 7.1%)	4 ( 3.6%)	21 (17.1%)	1.8972e-05
KIAA1109_Mutated	15 ( 6.7%)	12 (10.6%)	8 ( 7.3%)	27 (22.0%)	9.6168e-05
GRIA2_Mutated	7 ( 3.1%)	6 ( 5.3%)	5 ( 4.5%)	16 (13.0%)	0.002141
ADAMTS16_Mutated	11 ( 4.9%)	11 ( 9.7%)	4 ( 3.6%)	18 (14.6%)	0.002868
TRIO_Mutated	6 ( 2.7%)	10 ( 8.8%)	1 ( 0.9%)	21 (17.1%)	2.00613e-07
PRDM9_Mutated	9 ( 4.0%)	7 ( 6.2%)	3 ( 2.7%)	18 (14.6%)	0.000372351
CDH10_Mutated	11 ( 4.9%)	9 ( 8.0%)	3 ( 2.7%)	20 (16.3%)	0.000226998
CDH9_Mutated	13 ( 5.8%)	5 ( 4.4%)	9 ( 8.2%)	17 (13.8%)	0.0245389
SPEF2_Mutated	7 ( 3.1%)	9 ( 8.0%)	5 ( 4.5%)	20 (16.3%)	6.35272e-05
ADGRV1_Mutated	19 ( 8.4%)	14 (12.4%)	3 ( 2.7%)	38 (30.9%)	1.08148e-10
FBN2_Mutated	10 ( 4.4%)	4 ( 3.5%)	3 ( 2.7%)	24 (19.5%)	7.08946e-08
PCDHA9_Mutated	10 ( 4.4%)	4 ( 3.5%)	0 ( 0.0%)	16 (13.0%)	6.77796e-05
PCDHA13_Mutated	12 ( 5.3%)	6 ( 5.3%)	3 ( 2.7%)	14 (11.4%)	0.0368893
FAT2_Mutated	11 ( 4.9%)	10 ( 8.8%)	4 ( 3.6%)	26 (21.1%)	9.1616e-07
TENM2_Mutated	12 ( 5.3%)	5 ( 4.4%)	3 ( 2.7%)	24 (19.5%)	6.89387e-07
NSD1_Mutated	8 ( 3.6%)	2 ( 1.8%)	4 ( 3.6%)	17 (13.8%)	6.38297e-05
FLT4_Mutated	7 ( 3.1%)	6 ( 5.3%)	3 ( 2.7%)	15 (12.2%)	0.00191424
ITPR3_Mutated	5 ( 2.2%)	5 ( 4.4%)	3 ( 2.7%)	21 (17.1%)	1.06896e-07
DAAM2_Mutated	6 ( 2.7%)	5 ( 4.4%)	3 ( 2.7%)	18 (14.6%)	1.83e-05
ZNF318_Mutated	3 ( 1.3%)	5 ( 4.4%)	4 ( 3.6%)	17 (13.8%)	7.06405e-06
DOP1A_Mutated	5 ( 2.2%)	5 ( 4.4%)	2 ( 1.8%)	17 (13.8%)	1.03289e-05
REV3L_Mutated	4 ( 1.8%)	7 ( 6.2%)	5 ( 4.5%)	20 (16.3%)	2.21671e-06
ROS1_Mutated	4 ( 1.8%)	12 (10.6%)	6 ( 5.5%)	22 (17.9%)	7.81034e-07
GRM1_Mutated	6 ( 2.7%)	3 ( 2.7%)	7 ( 6.4%)	13 (10.6%)	0.00685387
AKAP12_Mutated	12 ( 5.3%)	10 ( 8.8%)	2 ( 1.8%)	18 (14.6%)	0.00101615
IGF2R_Mutated	10 ( 4.4%)	8 ( 7.1%)	2 ( 1.8%)	28 (22.8%)	1.52563e-09
PKD1L1_Mutated	6 ( 2.7%)	7 ( 6.2%)	5 ( 4.5%)	17 (13.8%)	0.000479905
ZAN_Mutated	3 ( 1.3%)	7 ( 6.2%)	3 ( 2.7%)	19 (15.4%)	5.03481e-07
MUC17_Mutated	11 ( 4.9%)	7 ( 6.2%)	6 ( 5.5%)	21 (17.1%)	0.000359391
PLXNA4_Mutated	4 ( 1.8%)	9 ( 8.0%)	3 ( 2.7%)	26 (21.1%)	2.04822e-10
KMT2C_Mutated	10 ( 4.4%)	13 (11.5%)	7 ( 6.4%)	25 (20.3%)	1.60549e-05
DLC1_Mutated	8 ( 3.6%)	7 ( 6.2%)	3 ( 2.7%)	18 (14.6%)	0.000194896
DOCK5_Mutated	5 ( 2.2%)	7 ( 6.2%)	2 ( 1.8%)	20 (16.3%)	4.53037e-07
PRKDC_Mutated	10 ( 4.4%)	8 ( 7.1%)	7 ( 6.4%)	24 (19.5%)	1.82181e-05
COL14A1_Mutated	8 ( 3.6%)	5 ( 4.4%)	1 ( 0.9%)	18 (14.6%)	1.1429e-05
FER1L6_Mutated	4 ( 1.8%)	3 ( 2.7%)	5 ( 4.5%)	21 (17.1%)	3.17556e-08
TG_Mutated	13 ( 5.8%)	4 ( 3.5%)	5 ( 4.5%)	20 (16.3%)	0.000297426
COL22A1_Mutated	12 ( 5.3%)	3 ( 2.7%)	4 ( 3.6%)	22 (17.9%)	3.90641e-06
TAF1L_Mutated	14 ( 6.2%)	6 ( 5.3%)	4 ( 3.6%)	21 (17.1%)	0.000282995
MRC1_Mutated	8 ( 3.6%)	5 ( 4.4%)	3 ( 2.7%)	14 (11.4%)	0.00688657
ANK3_Mutated	12 ( 5.3%)	11 ( 9.7%)	4 ( 3.6%)	35 (28.5%)	2.31974e-11
CDH23_Mutated	10 ( 4.4%)	7 ( 6.2%)	3 ( 2.7%)	17 (13.8%)	0.00177565
ZNF518A_Mutated	3 ( 1.3%)	5 ( 4.4%)	5 ( 4.5%)	19 (15.4%)	9.30048e-07
NAV2_Mutated	5 ( 2.2%)	10 ( 8.8%)	3 ( 2.7%)	20 (16.3%)	2.24797e-06
ATG2A_Mutated	9 ( 4.0%)	3 ( 2.7%)	3 ( 2.7%)	15 (12.2%)	0.0013957
DYNC2H1_Mutated	16 ( 7.1%)	11 ( 9.7%)	5 ( 4.5%)	22 (17.9%)	0.00203235
NCAM1_Mutated	6 ( 2.7%)	5 ( 4.4%)	5 ( 4.5%)	14 (11.4%)	0.00565963
A2ML1_Mutated	8 ( 3.6%)	6 ( 5.3%)	1 ( 0.9%)	24 (19.5%)	5.51411e-09
KIF21A_Mutated	5 ( 2.2%)	8 ( 7.1%)	5 ( 4.5%)	19 (15.4%)	2.75238e-05
KMT2D_Mutated	8 ( 3.6%)	14 (12.4%)	7 ( 6.4%)	34 (27.6%)	7.83693e-11
TRHDE_Mutated	7 ( 3.1%)	5 ( 4.4%)	2 ( 1.8%)	17 (13.8%)	5.80965e-05
OTOGL_Mutated	11 ( 4.9%)	8 ( 7.1%)	3 ( 2.7%)	23 (18.7%)	6.71481e-06
CEP290_Mutated	7 ( 3.1%)	7 ( 6.2%)	3 ( 2.7%)	20 (16.3%)	8.66095e-06
ACACB_Mutated	2 ( 0.9%)	8 ( 7.1%)	3 ( 2.7%)	19 (15.4%)	1.82499e-07
CUX2_Mutated	10 ( 4.4%)	8 ( 7.1%)	3 ( 2.7%)	15 (12.2%)	0.0115078
DNAH10_Mutated	8 ( 3.6%)	17 (15.0%)	7 ( 6.4%)	28 (22.8%)	8.68617e-08
EP400_Mutated	7 ( 3.1%)	3 ( 2.7%)	4 ( 3.6%)	25 (20.3%)	9.48294e-10
POLE_Mutated	5 ( 2.2%)	5 ( 4.4%)	2 ( 1.8%)	22 (17.9%)	7.57145e-09
ZC3H13_Mutated	8 ( 3.6%)	4 ( 3.5%)	4 ( 3.6%)	18 (14.6%)	0.000100756
SLITRK5_Mutated	5 ( 2.2%)	8 ( 7.1%)	4 ( 3.6%)	15 (12.2%)	0.0010148
CHD8_Mutated	5 ( 2.2%)	9 ( 8.0%)	3 ( 2.7%)	21 (17.1%)	6.19814e-07
MYH6_Mutated	9 ( 4.0%)	3 ( 2.7%)	4 ( 3.6%)	18 (14.6%)	8.96977e-05
AKAP6_Mutated	6 ( 2.7%)	5 ( 4.4%)	7 ( 6.4%)	22 (17.9%)	1.32776e-06
NID2_Mutated	4 (1.8%)	9 (8.0%)	4 (3.6%)	12 (9.8%)	0.00443713
SYNE2_Mutated	15 ( 6.7%)	14 (12.4%)	8 ( 7.3%)	28 (22.8%)	4.63896e-05
LTBP2_Mutated	2 ( 0.9%)	7 ( 6.2%)	2 ( 1.8%)	20 (16.3%)	1.03495e-08
UNC79_Mutated	8 ( 3.6%)	11 ( 9.7%)	6 ( 5.5%)	20 (16.3%)	0.000258116
DYNC1H1_Mutated	8 ( 3.6%)	5 ( 4.4%)	3 ( 2.7%)	27 (22.0%)	3.39616e-10
AHNAK2_Mutated	18 ( 8.0%)	11 ( 9.7%)	7 ( 6.4%)	23 (18.7%)	0.00577659
NPAP1_Mutated	14 ( 6.2%)	3 ( 2.7%)	2 ( 1.8%)	13 (10.6%)	0.0132643
UNC13C_Mutated	22 ( 9.8%)	13 (11.5%)	5 ( 4.5%)	22 (17.9%)	0.0110654
ADAMTSL3_Mutated	7 ( 3.1%)	5 ( 4.4%)	5 ( 4.5%)	19 (15.4%)	5.03319e-05
SRRM2_Mutated	7 ( 3.1%)	4 ( 3.5%)	4 ( 3.6%)	16 (13.0%)	0.000534406
SRCAP_Mutated	12 ( 5.3%)	9 ( 8.0%)	4 ( 3.6%)	23 (18.7%)	4.11101e-05
ZNF423_Mutated	8 ( 3.6%)	6 ( 5.3%)	6 ( 5.5%)	15 (12.2%)	0.0136213
NLRC5_Mutated	6 ( 2.7%)	4 ( 3.5%)	2 ( 1.8%)	19 (15.4%)	8.64103e-07
ADAMTS18_Mutated	7 ( 3.1%)	5 ( 4.4%)	4 ( 3.6%)	18 (14.6%)	9.01813e-05
PLCG2_Mutated	4 ( 1.8%)	5 ( 4.4%)	3 ( 2.7%)	23 (18.7%)	1.53616e-09
ZC3H18_Mutated	3 ( 1.3%)	4 ( 3.5%)	4 ( 3.6%)	21 (17.1%)	1.03627e-08
DNAH9_Mutated	9 ( 4.0%)	9 ( 8.0%)	7 ( 6.4%)	25 (20.3%)	3.90206e-06
ACACA_Mutated	6 ( 2.7%)	9 ( 8.0%)	5 ( 4.5%)	16 (13.0%)	0.00143485
GPR179_Mutated	6 ( 2.7%)	9 ( 8.0%)	4 ( 3.6%)	16 (13.0%)	0.000832774
RNF43_Mutated	11 ( 4.9%)	15 (13.3%)	8 ( 7.3%)	30 (24.4%)	3.72406e-07
DNAH17_Mutated	12 ( 5.3%)	6 ( 5.3%)	6 ( 5.5%)	28 (22.8%)	1.03845e-07
FHOD3_Mutated	6 ( 2.7%)	7 ( 6.2%)	2 ( 1.8%)	19 (15.4%)	4.60629e-06
ALPK2_Mutated	7 ( 3.1%)	3 ( 2.7%)	2 ( 1.8%)	18 (14.6%)	3.70544e-06
PREX1_Mutated	6 ( 2.7%)	4 ( 3.5%)	2 ( 1.8%)	18 (14.6%)	3.55844e-06
DIDO1_Mutated	6 ( 2.7%)	4 ( 3.5%)	3 ( 2.7%)	19 (15.4%)	2.43406e-06
SCAF4_Mutated	4 ( 1.8%)	7 ( 6.2%)	1 ( 0.9%)	19 (15.4%)	1.63771e-07
COL18A1_Mutated	5 ( 2.2%)	7 ( 6.2%)	3 ( 2.7%)	14 (11.4%)	0.00143608
PCNT_Mutated	11 ( 4.9%)	3 ( 2.7%)	2 ( 1.8%)	19 (15.4%)	1.48179e-05
TRIOBP_Mutated	6 ( 2.7%)	5 ( 4.4%)	4 ( 3.6%)	21 (17.1%)	7.75929e-07
TNRC6B_Mutated	13 ( 5.8%)	3 ( 2.7%)	6 ( 5.5%)	15 (12.2%)	0.0209882
EP300_Mutated	8 ( 3.6%)	6 ( 5.3%)	4 ( 3.6%)	14 (11.4%)	0.0156628
BCOR_Mutated	5 ( 2.2%)	8 ( 7.1%)	3 ( 2.7%)	17 (13.8%)	6.31183e-05
BCORL1_Mutated	7 ( 3.1%)	8 ( 7.1%)	3 ( 2.7%)	16 (13.0%)	0.00090478
ADGRG4_Mutated	13 ( 5.8%)	4 ( 3.5%)	1 ( 0.9%)	20 (16.3%)	8.83995e-06
AFF2_Mutated	8 ( 3.6%)	9 ( 8.0%)	3 ( 2.7%)	17 (13.8%)	0.000680048
FLNA_Mutated	7 ( 3.1%)	6 ( 5.3%)	4 ( 3.6%)	16 (13.0%)	0.00129492
COL5A2_Mutated	11 ( 4.9%)	2 ( 1.8%)	5 ( 4.5%)	17 (13.8%)	0.000568057
GOLGB1_Mutated	7 ( 3.1%)	7 ( 6.2%)	6 ( 5.5%)	16 (13.0%)	0.0038863
CDH18_Mutated	12 (5.3%)	4 (3.5%)	3 (2.7%)	11 (8.9%)	0.142061
ASTN2_Mutated	11 (4.9%)	5 (4.4%)	3 (2.7%)	12 (9.8%)	0.0937247
CACNA1G_Mutated	4 ( 1.8%)	7 ( 6.2%)	3 ( 2.7%)	17 (13.8%)	2.05389e-05
GRIK3_Mutated	10 (4.4%)	5 (4.4%)	6 (5.5%)	11 (8.9%)	0.325211
CACHD1_Mutated	6 ( 2.7%)	4 ( 3.5%)	5 ( 4.5%)	14 (11.4%)	0.00371806
TNN_Mutated	7 ( 3.1%)	3 ( 2.7%)	3 ( 2.7%)	18 (14.6%)	9.9535e-06
RIF1_Mutated	7 ( 3.1%)	7 ( 6.2%)	4 ( 3.6%)	19 (15.4%)	6.46778e-05
SLC4A3_Mutated	9 (4.0%)	5 (4.4%)	4 (3.6%)	11 (8.9%)	0.177136
ITPR1_Mutated	6 ( 2.7%)	8 ( 7.1%)	5 ( 4.5%)	18 (14.6%)	0.000201442
FLNB_Mutated	6 ( 2.7%)	4 ( 3.5%)	4 ( 3.6%)	18 (14.6%)	2.1168e-05
USF3_Mutated	4 ( 1.8%)	6 ( 5.3%)	5 ( 4.5%)	18 (14.6%)	1.80073e-05
POLQ_Mutated	9 ( 4.0%)	4 ( 3.5%)	4 ( 3.6%)	17 (13.8%)	0.000596023
MYLK_Mutated	3 ( 1.3%)	7 ( 6.2%)	4 ( 3.6%)	15 (12.2%)	0.00015174
MED12L_Mutated	4 ( 1.8%)	8 ( 7.1%)	2 ( 1.8%)	21 (17.1%)	5.22803e-08
KDR_Mutated	6 ( 2.7%)	7 ( 6.2%)	4 ( 3.6%)	14 (11.4%)	0.00545432
EPHA5_Mutated	17 ( 7.6%)	4 ( 3.5%)	1 ( 0.9%)	18 (14.6%)	0.000220489
ENAM_Mutated	6 ( 2.7%)	7 ( 6.2%)	4 ( 3.6%)	14 (11.4%)	0.00545432
FAT1_Mutated	10 ( 4.4%)	10 ( 8.8%)	4 ( 3.6%)	26 (21.1%)	4.21126e-07
LIFR_Mutated	9 ( 4.0%)	4 ( 3.5%)	2 ( 1.8%)	14 (11.4%)	0.00340422
MAP1B_Mutated	5 ( 2.2%)	8 ( 7.1%)	5 ( 4.5%)	20 (16.3%)	8.63911e-06
ZNF292_Mutated	8 ( 3.6%)	10 ( 8.8%)	3 ( 2.7%)	17 (13.8%)	0.000626241
TRRAP_Mutated	7 ( 3.1%)	3 ( 2.7%)	5 ( 4.5%)	27 (22.0%)	1.10463e-10
FLNC_Mutated	7 ( 3.1%)	12 (10.6%)	4 ( 3.6%)	25 (20.3%)	1.30619e-07
MPDZ_Mutated	6 ( 2.7%)	5 ( 4.4%)	2 ( 1.8%)	20 (16.3%)	4.38091e-07
BNC2_Mutated	7 ( 3.1%)	3 ( 2.7%)	10 ( 9.1%)	17 (13.8%)	0.000258432
CACNA1B_Mutated	10 ( 4.4%)	7 ( 6.2%)	4 ( 3.6%)	17 (13.8%)	0.00351986
JMJD1C_Mutated	6 ( 2.7%)	4 ( 3.5%)	2 ( 1.8%)	17 (13.8%)	1.40457e-05
SLIT1_Mutated	10 ( 4.4%)	6 ( 5.3%)	3 ( 2.7%)	13 (10.6%)	0.0451313
MKI67_Mutated	8 ( 3.6%)	10 ( 8.8%)	3 ( 2.7%)	22 (17.9%)	3.6775e-06
GRM5_Mutated	9 ( 4.0%)	4 ( 3.5%)	2 ( 1.8%)	17 (13.8%)	0.00012245
KMT2A_Mutated	8 ( 3.6%)	9 ( 8.0%)	4 ( 3.6%)	19 (15.4%)	0.000201366
A2M_Mutated	8 ( 3.6%)	6 ( 5.3%)	2 ( 1.8%)	13 (10.6%)	0.0106325
KDM2B_Mutated	6 ( 2.7%)	3 ( 2.7%)	4 ( 3.6%)	16 (13.0%)	0.000126893
TMEM132B_Mutated	6 ( 2.7%)	5 ( 4.4%)	5 ( 4.5%)	13 (10.6%)	0.0142832
MTUS2_Mutated	9 ( 4.0%)	4 ( 3.5%)	4 ( 3.6%)	14 (11.4%)	0.0125138
RALGAPA1_Mutated	5 (2.2%)	9 (8.0%)	3 (2.7%)	12 (9.8%)	0.00557623
SIPA1L1_Mutated	5 ( 2.2%)	7 ( 6.2%)	2 ( 1.8%)	17 (13.8%)	2.16156e-05
FLRT2_Mutated	10 ( 4.4%)	1 ( 0.9%)	7 ( 6.4%)	14 (11.4%)	0.00420108
GABRA5_Mutated	9 (4.0%)	9 (8.0%)	5 (4.5%)	9 (7.3%)	0.361821
MGA_Mutated	7 ( 3.1%)	5 ( 4.4%)	5 ( 4.5%)	20 (16.3%)	1.47474e-05
VPS13C_Mutated	8 ( 3.6%)	6 ( 5.3%)	5 ( 4.5%)	23 (18.7%)	1.40527e-06
MYH13_Mutated	5 ( 2.2%)	7 ( 6.2%)	4 ( 3.6%)	16 (13.0%)	0.000348469
TANC2_Mutated	6 ( 2.7%)	3 ( 2.7%)	4 ( 3.6%)	16 (13.0%)	0.000126893
LAMA3_Mutated	6 ( 2.7%)	7 ( 6.2%)	6 ( 5.5%)	16 (13.0%)	0.00191169
SETBP1_Mutated	4 ( 1.8%)	5 ( 4.4%)	4 ( 3.6%)	18 (14.6%)	5.74133e-06
MEGF8_Mutated	13 ( 5.8%)	6 ( 5.3%)	2 ( 1.8%)	23 (18.7%)	3.06504e-06
CHD6_Mutated	7 ( 3.1%)	9 ( 8.0%)	2 ( 1.8%)	19 (15.4%)	1.62751e-05
DSCAM_Mutated	9 ( 4.0%)	11 ( 9.7%)	11 (10.0%)	24 (19.5%)	6.48637e-05
MYH9_Mutated	5 ( 2.2%)	6 ( 5.3%)	4 ( 3.6%)	22 (17.9%)	1.30354e-07
BRWD3_Mutated	11 ( 4.9%)	9 ( 8.0%)	6 ( 5.5%)	14 (11.4%)	0.12553
DOCK11_Mutated	8 ( 3.6%)	3 ( 2.7%)	4 ( 3.6%)	14 (11.4%)	0.00448334
BIRC6_Mutated	7 ( 3.1%)	7 ( 6.2%)	2 ( 1.8%)	25 (20.3%)	3.31833e-09
SCN3A_Mutated	5 ( 2.2%)	5 ( 4.4%)	7 ( 6.4%)	19 (15.4%)	2.03262e-05
DOCK10_Mutated	6 ( 2.7%)	5 ( 4.4%)	3 ( 2.7%)	15 (12.2%)	0.000707273
TNXB_Mutated	10 ( 4.4%)	14 (12.4%)	6 ( 5.5%)	21 (17.1%)	0.000288219
TULP4_Mutated	6 ( 2.7%)	6 ( 5.3%)	3 ( 2.7%)	17 (13.8%)	9.9968e-05
FAM135B_Mutated	6 ( 2.7%)	6 ( 5.3%)	2 ( 1.8%)	21 (17.1%)	2.00415e-07
SETX_Mutated	7 ( 3.1%)	7 ( 6.2%)	6 ( 5.5%)	18 (14.6%)	0.000571385
ITPR2_Mutated	4 ( 1.8%)	6 ( 5.3%)	3 ( 2.7%)	20 (16.3%)	2.70868e-07
COL4A1_Mutated	9 (4.0%)	6 (5.3%)	4 (3.6%)	10 (8.1%)	0.333178
MYH7_Mutated	7 ( 3.1%)	5 ( 4.4%)	3 ( 2.7%)	19 (15.4%)	1.17966e-05
AKAP13_Mutated	5 ( 2.2%)	7 ( 6.2%)	0 ( 0.0%)	20 (16.3%)	3.00989e-08
ABCC1_Mutated	5 ( 2.2%)	7 ( 6.2%)	3 ( 2.7%)	14 (11.4%)	0.00143608
ANKRD11_Mutated	11 ( 4.9%)	9 ( 8.0%)	4 ( 3.6%)	18 (14.6%)	0.00309377
NOTCH3_Mutated	3 ( 1.3%)	5 ( 4.4%)	4 ( 3.6%)	18 (14.6%)	1.8247e-06
NLRP7_Mutated	6 ( 2.7%)	6 ( 5.3%)	4 ( 3.6%)	16 (13.0%)	0.000630928
LAMA5_Mutated	11 ( 4.9%)	7 ( 6.2%)	6 ( 5.5%)	18 (14.6%)	0.00619385
NLGN4X_Mutated	6 ( 2.7%)	4 ( 3.5%)	6 ( 5.5%)	13 (10.6%)	0.0117596
PLXNB3_Mutated	8 ( 3.6%)	5 ( 4.4%)	0 ( 0.0%)	17 (13.8%)	1.10454e-05
SCN5A_Mutated	9 ( 4.0%)	7 ( 6.2%)	5 ( 4.5%)	19 (15.4%)	0.000504629
PTPN13_Mutated	7 ( 3.1%)	5 ( 4.4%)	2 ( 1.8%)	20 (16.3%)	1.13182e-06
PCDH10_Mutated	12 ( 5.3%)	5 ( 4.4%)	3 ( 2.7%)	26 (21.1%)	4.83065e-08
PCDHA2_Mutated	10 ( 4.4%)	9 ( 8.0%)	4 ( 3.6%)	17 (13.8%)	0.00439988
ATG2B_Mutated	8 ( 3.6%)	2 ( 1.8%)	2 ( 1.8%)	20 (16.3%)	1.70638e-07
GTF3C1_Mutated	5 ( 2.2%)	8 ( 7.1%)	4 ( 3.6%)	16 (13.0%)	0.000379554
ZEB2_Mutated	6 ( 2.7%)	7 ( 6.2%)	2 ( 1.8%)	14 (11.4%)	0.00138866
DOCK4_Mutated	7 ( 3.1%)	4 ( 3.5%)	6 ( 5.5%)	13 (10.6%)	0.020988
PXDNL_Mutated	12 ( 5.3%)	11 ( 9.7%)	2 ( 1.8%)	15 (12.2%)	0.00778344
TRPM3_Mutated	4 ( 1.8%)	9 ( 8.0%)	4 ( 3.6%)	18 (14.6%)	1.76965e-05
PAPPA2_Mutated	14 ( 6.2%)	8 ( 7.1%)	3 ( 2.7%)	22 (17.9%)	0.000105716
COL12A1_Mutated	11 ( 4.9%)	12 (10.6%)	8 ( 7.3%)	30 (24.4%)	2.55352e-07
MYO7A_Mutated	10 ( 4.4%)	4 ( 3.5%)	2 ( 1.8%)	16 (13.0%)	0.000640251
DCLK1_Mutated	12 (5.3%)	7 (6.2%)	3 (2.7%)	10 (8.1%)	0.346237
EML5_Mutated	5 ( 2.2%)	6 ( 5.3%)	2 ( 1.8%)	16 (13.0%)	5.68046e-05
ZNF804A_Mutated	6 ( 2.7%)	7 ( 6.2%)	5 ( 4.5%)	14 (11.4%)	0.00832971
FN1_Mutated	7 ( 3.1%)	10 ( 8.8%)	8 ( 7.3%)	17 (13.8%)	0.00309478
PCDHA6_Mutated	7 ( 3.1%)	3 ( 2.7%)	6 ( 5.5%)	17 (13.8%)	0.000205738
PTEN_Mutated	7 ( 3.1%)	6 ( 5.3%)	5 ( 4.5%)	16 (13.0%)	0.002141
SORCS1_Mutated	9 ( 4.0%)	6 ( 5.3%)	8 ( 7.3%)	14 (11.4%)	0.0567784
PCDHB8_Mutated	8 ( 3.6%)	6 ( 5.3%)	4 ( 3.6%)	21 (17.1%)	8.47666e-06
SLIT2_Mutated	7 ( 3.1%)	4 ( 3.5%)	2 ( 1.8%)	17 (13.8%)	3.19675e-05
SDK2_Mutated	8 ( 3.6%)	6 ( 5.3%)	4 ( 3.6%)	19 (15.4%)	9.47856e-05
DLGAP3_Mutated	3 ( 1.3%)	8 ( 7.1%)	1 ( 0.9%)	17 (13.8%)	8.69651e-07
ABCA12_Mutated	9 ( 4.0%)	13 (11.5%)	4 ( 3.6%)	21 (17.1%)	4.57361e-05
CNTN6_Mutated	7 ( 3.1%)	6 ( 5.3%)	5 ( 4.5%)	19 (15.4%)	8.40976e-05
PCDHB2_Mutated	9 ( 4.0%)	6 ( 5.3%)	1 ( 0.9%)	14 (11.4%)	0.00269227
PHIP_Mutated	6 ( 2.7%)	6 ( 5.3%)	2 ( 1.8%)	18 (14.6%)	1.1411e-05
MAP3K4_Mutated	11 ( 4.9%)	6 ( 5.3%)	2 ( 1.8%)	21 (17.1%)	1.08788e-05
AKAP9_Mutated	10 ( 4.4%)	8 ( 7.1%)	4 ( 3.6%)	28 (22.8%)	1.39357e-08
CALD1_Mutated	6 ( 2.7%)	8 ( 7.1%)	3 ( 2.7%)	13 (10.6%)	0.00681143
MGAM_Mutated	8 ( 3.6%)	7 ( 6.2%)	3 ( 2.7%)	14 (11.4%)	0.0100102
CNTNAP2_Mutated	7 ( 3.1%)	9 ( 8.0%)	3 ( 2.7%)	19 (15.4%)	4.24005e-05
RP1L1_Mutated	14 ( 6.2%)	6 ( 5.3%)	3 ( 2.7%)	13 (10.6%)	0.0952832
DCAF4L2_Mutated	10 (4.4%)	8 (7.1%)	6 (5.5%)	12 (9.8%)	0.256339
ZNF462_Mutated	5 ( 2.2%)	6 ( 5.3%)	3 ( 2.7%)	16 (13.0%)	0.00013871
ARHGAP21_Mutated	8 ( 3.6%)	7 ( 6.2%)	2 ( 1.8%)	15 (12.2%)	0.00186842
LRRIQ1_Mutated	14 ( 6.2%)	6 ( 5.3%)	4 ( 3.6%)	21 (17.1%)	0.000282995
UGGT2_Mutated	6 ( 2.7%)	4 ( 3.5%)	4 ( 3.6%)	19 (15.4%)	5.6527e-06
CNTNAP4_Mutated	9 ( 4.0%)	5 ( 4.4%)	5 ( 4.5%)	16 (13.0%)	0.00477197
LAMA1_Mutated	12 ( 5.3%)	10 ( 8.8%)	2 ( 1.8%)	25 (20.3%)	8.20327e-07
ROCK1_Mutated	7 ( 3.1%)	4 ( 3.5%)	2 ( 1.8%)	17 (13.8%)	3.19675e-05
COL4A5_Mutated	8 ( 3.6%)	4 ( 3.5%)	4 ( 3.6%)	15 (12.2%)	0.00293332
F8_Mutated	10 ( 4.4%)	8 ( 7.1%)	2 ( 1.8%)	21 (17.1%)	1.31346e-05
ASTN1_Mutated	7 ( 3.1%)	5 ( 4.4%)	3 ( 2.7%)	20 (16.3%)	3.16397e-06
YTHDC2_Mutated	3 ( 1.3%)	5 ( 4.4%)	2 ( 1.8%)	19 (15.4%)	5.86484e-08
CHD9_Mutated	9 ( 4.0%)	3 ( 2.7%)	3 ( 2.7%)	21 (17.1%)	8.0996e-07
NUGGC_Mutated	6 ( 2.7%)	5 ( 4.4%)	4 ( 3.6%)	16 (13.0%)	0.000436592
ADCY8_Mutated	10 ( 4.4%)	6 ( 5.3%)	3 ( 2.7%)	14 (11.4%)	0.0207729
IRS4_Mutated	8 ( 3.6%)	5 ( 4.4%)	2 ( 1.8%)	17 (13.8%)	0.000118007
DISP3_Mutated	13 (5.8%)	7 (6.2%)	3 (2.7%)	10 (8.1%)	0.366769
SPAG17_Mutated	15 ( 6.7%)	5 ( 4.4%)	4 ( 3.6%)	17 (13.8%)	0.00893569
PTPRC_Mutated	10 ( 4.4%)	5 ( 4.4%)	2 ( 1.8%)	20 (16.3%)	1.10988e-05
GREB1_Mutated	11 ( 4.9%)	5 ( 4.4%)	4 ( 3.6%)	14 (11.4%)	0.0374943
ALMS1_Mutated	15 ( 6.7%)	1 ( 0.9%)	3 ( 2.7%)	21 (17.1%)	2.50849e-06
RANBP2_Mutated	7 ( 3.1%)	5 ( 4.4%)	2 ( 1.8%)	18 (14.6%)	1.63592e-05
HECW2_Mutated	6 ( 2.7%)	10 ( 8.8%)	1 ( 0.9%)	14 (11.4%)	0.000302725
CNTN4_Mutated	5 ( 2.2%)	4 ( 3.5%)	3 ( 2.7%)	17 (13.8%)	1.45359e-05
SMARCAD1_Mutated	5 ( 2.2%)	5 ( 4.4%)	1 ( 0.9%)	20 (16.3%)	4.1547e-08
ADAMTS12_Mutated	8 ( 3.6%)	5 ( 4.4%)	5 ( 4.5%)	15 (12.2%)	0.00728289
VCAN_Mutated	12 ( 5.3%)	9 ( 8.0%)	7 ( 6.4%)	21 (17.1%)	0.00175268
ANKHD1-EIF4EBP3_Mutated	4 ( 1.8%)	4 ( 3.5%)	3 ( 2.7%)	18 (14.6%)	1.25373e-06
PCDHB7_Mutated	9 ( 4.0%)	5 ( 4.4%)	4 ( 3.6%)	16 (13.0%)	0.00291761
ADGRB3_Mutated	15 ( 6.7%)	3 ( 2.7%)	5 ( 4.5%)	13 (10.6%)	0.0731525
FILIP1_Mutated	8 ( 3.6%)	4 ( 3.5%)	5 ( 4.5%)	15 (12.2%)	0.00457503
GALNT17_Mutated	11 ( 4.9%)	7 ( 6.2%)	3 ( 2.7%)	16 (13.0%)	0.00685027
COL1A2_Mutated	7 ( 3.1%)	6 ( 5.3%)	4 ( 3.6%)	13 (10.6%)	0.0219383
NUP205_Mutated	7 ( 3.1%)	5 ( 4.4%)	1 ( 0.9%)	23 (18.7%)	4.07296e-09
FRMPD1_Mutated	8 ( 3.6%)	6 ( 5.3%)	3 ( 2.7%)	14 (11.4%)	0.00890703
MON2_Mutated	7 ( 3.1%)	6 ( 5.3%)	3 ( 2.7%)	13 (10.6%)	0.0130242
PPFIA2_Mutated	9 ( 4.0%)	4 ( 3.5%)	3 ( 2.7%)	14 (11.4%)	0.00715437
ZFYVE26_Mutated	9 (4.0%)	8 (7.1%)	3 (2.7%)	12 (9.8%)	0.0632464
CDK12_Mutated	6 ( 2.7%)	7 ( 6.2%)	0 ( 0.0%)	21 (17.1%)	2.2439e-08
MTCL1_Mutated	6 ( 2.7%)	7 ( 6.2%)	1 ( 0.9%)	15 (12.2%)	0.000178425
CDH2_Mutated	8 ( 3.6%)	7 ( 6.2%)	2 ( 1.8%)	13 (10.6%)	0.0112294
USP9X_Mutated	12 ( 5.3%)	5 ( 4.4%)	2 ( 1.8%)	18 (14.6%)	0.000312927
KCNH7_Mutated	7 ( 3.1%)	12 (10.6%)	2 ( 1.8%)	14 (11.4%)	0.000715784
PTPRK_Mutated	5 ( 2.2%)	8 ( 7.1%)	6 ( 5.5%)	20 (16.3%)	1.5193e-05
ZNF804B_Mutated	11 ( 4.9%)	9 ( 8.0%)	3 ( 2.7%)	18 (14.6%)	0.00150253
ARFGEF1_Mutated	7 ( 3.1%)	4 ( 3.5%)	6 ( 5.5%)	19 (15.4%)	4.26638e-05
CNOT1_Mutated	11 ( 4.9%)	6 ( 5.3%)	3 ( 2.7%)	23 (18.7%)	2.54855e-06
MAP2K4_Mutated	6 ( 2.7%)	7 ( 6.2%)	2 ( 1.8%)	15 (12.2%)	0.00049764
BRAF_Mutated	12 ( 5.3%)	16 (14.2%)	6 ( 5.5%)	32 (26.0%)	2.28448e-08
TIAM1_Mutated	10 ( 4.4%)	6 ( 5.3%)	6 ( 5.5%)	16 (13.0%)	0.0158426
TCHH_Mutated	5 ( 2.2%)	10 ( 8.8%)	3 ( 2.7%)	16 (13.0%)	0.000149771
ZNF646_Mutated	8 ( 3.6%)	5 ( 4.4%)	2 ( 1.8%)	14 (11.4%)	0.00327171

## Sheet: Supplementary file 2b
Somatic copy number alterations	C1	C2	C3	C4	pvalue
1q44-Amp-Amp	54 (19.7%)	16 (11.5%)	28 (19.6%)	14 ( 8.3%)	0.00344423
2q33.1-Amp-Amp	43 (15.7%)	17 (12.2%)	12 ( 8.4%)	13 ( 7.7%)	0.0716706
2q36.1-Amp-Amp	41 (15.0%)	13 ( 9.4%)	12 ( 8.4%)	12 ( 7.1%)	0.062902
3p24.1-Amp-Amp	23 (8.4%)	3 (2.2%)	10 (7.0%)	2 (1.2%)	0.00270721
5q35.3-Amp-Amp	20 (7.3%)	6 (4.3%)	9 (6.3%)	11 (6.5%)	0.707334
6p22.3-Amp-Amp	34 (12.4%)	15 (10.8%)	25 (17.5%)	17 (10.1%)	0.153937
6p21.1-Amp-Amp	41 (15.0%)	20 (14.4%)	26 (18.2%)	20 (11.8%)	0.427751
6p12.3-Amp-Amp	42 (15.3%)	16 (11.5%)	23 (16.1%)	23 (13.6%)	0.613708
6q12-Amp-Amp	35 (12.8%)	17 (12.2%)	17 (11.9%)	16 ( 9.5%)	0.85433
6q23.2-Amp-Amp	36 (13.1%)	16 (11.5%)	14 ( 9.8%)	15 ( 8.9%)	0.671833
6q23.3-Amp-Amp	31 (11.3%)	18 (12.9%)	13 ( 9.1%)	19 (11.2%)	0.84152
7p15.3-Amp-Amp	136 (49.6%)	57 (41.0%)	77 (53.8%)	51 (30.2%)	1.50433e-05
8p11.23-Amp-Amp	62 (22.6%)	20 (14.4%)	34 (23.8%)	29 (17.2%)	0.0936568
8p11.21-Amp-Amp	80 (29.2%)	23 (16.5%)	39 (27.3%)	32 (18.9%)	0.00985265
8q21.13-Amp-Amp	122 (44.5%)	45 (32.4%)	65 (45.5%)	52 (30.8%)	0.00262453
8q22.3-Amp-Amp	126 (46.0%)	50 (36.0%)	66 (46.2%)	55 (32.5%)	0.0109502
8q24.21-Amp-Amp	130 (47.4%)	53 (38.1%)	72 (50.3%)	59 (34.9%)	0.00594804
10q22.3-Amp-Amp	12 (4.4%)	2 (1.4%)	6 (4.2%)	6 (3.6%)	0.465925
11p15.5-Amp-Amp	56 (20.4%)	12 ( 8.6%)	19 (13.3%)	17 (10.1%)	0.00377275
12p13.32-Amp-Amp	49 (17.9%)	24 (17.3%)	21 (14.7%)	27 (16.0%)	0.953754
12p11.23-Amp-Amp	49 (17.9%)	18 (12.9%)	18 (12.6%)	28 (16.6%)	0.446976
12q24.32-Amp-Amp	38 (13.9%)	14 (10.1%)	14 ( 9.8%)	21 (12.4%)	0.615754
13q12.13-Amp-Amp	151 (55.1%)	71 (51.1%)	87 (60.8%)	55 (32.5%)	1.43439e-07
13q12.2-Amp-Amp	147 (53.6%)	69 (49.6%)	87 (60.8%)	54 (32.0%)	1.33454e-07
13q22.1-Amp-Amp	153 (55.8%)	74 (53.2%)	85 (59.4%)	54 (32.0%)	1.2073e-07
13q33.3-Amp-Amp	139 (50.7%)	68 (48.9%)	84 (58.7%)	49 (29.0%)	6.96865e-08
16p11.2-Amp-Amp	55 (20.1%)	22 (15.8%)	29 (20.3%)	19 (11.2%)	0.0899412
16q12.1-Amp-Amp	50 (18.2%)	18 (12.9%)	28 (19.6%)	17 (10.1%)	0.0513229
17p11.2-Amp-Amp	19 (6.9%)	4 (2.9%)	10 (7.0%)	4 (2.4%)	0.0782287
17q11.2-Amp-Amp	54 (19.7%)	17 (12.2%)	24 (16.8%)	16 ( 9.5%)	0.0298704
17q12-Amp-Amp	56 (20.4%)	13 ( 9.4%)	25 (17.5%)	19 (11.2%)	0.0101978
17q21.2-Amp-Amp	54 (19.7%)	14 (10.1%)	23 (16.1%)	15 ( 8.9%)	0.00791358
17q23.2-Amp-Amp	48 (17.5%)	15 (10.8%)	21 (14.7%)	15 ( 8.9%)	0.0696402
17q24.2-Amp-Amp	50 (18.2%)	16 (11.5%)	20 (14.0%)	17 (10.1%)	0.113693
19q12-Amp-Amp	46 (16.8%)	19 (13.7%)	20 (14.0%)	9 ( 5.3%)	0.00959894
20p11.23-Amp-Amp	129 (47.1%)	52 (37.4%)	60 (42.0%)	40 (23.7%)	2.35662e-05
20q11.21-Amp-Amp	196 (71.5%)	76 (54.7%)	97 (67.8%)	67 (39.6%)	3.97119e-13
20q12-Amp-Amp	199 (72.6%)	76 (54.7%)	97 (67.8%)	67 (39.6%)	5.33571e-14
20q13.12-Amp-Amp	200 (73.0%)	80 (57.6%)	98 (68.5%)	69 (40.8%)	2.8e-13
20q13.2-Amp-Amp	198 (72.3%)	78 (56.1%)	97 (67.8%)	71 (42.0%)	9.18706e-12
20q13.32-Amp-Amp	199 (72.6%)	78 (56.1%)	97 (67.8%)	69 (40.8%)	6.85445e-13
1p36.11-Del-Del	86 (31.4%)	27 (19.4%)	42 (29.4%)	30 (17.8%)	0.00324954
1p33-Del-Del	59 (21.5%)	15 (10.8%)	26 (18.2%)	24 (14.2%)	0.0383822
3p24.3-Del-Del	17 ( 6.2%)	16 (11.5%)	16 (11.2%)	17 (10.1%)	0.136864
3p14.2-Del-Del	30 (10.9%)	24 (17.3%)	17 (11.9%)	22 (13.0%)	0.313619
3q26.31-Del-Del	22 (8.0%)	7 (5.0%)	9 (6.3%)	7 (4.1%)	0.440202
4q22.1-Del-Del	74 (27.0%)	32 (23.0%)	33 (23.1%)	19 (11.2%)	0.00255984
4q28.1-Del-Del	66 (24.1%)	26 (18.7%)	37 (25.9%)	20 (11.8%)	0.00560788
4q35.1-Del-Del	71 (25.9%)	33 (23.7%)	38 (26.6%)	27 (16.0%)	0.0917848
5q12.1-Del-Del	46 (16.8%)	17 (12.2%)	34 (23.8%)	16 ( 9.5%)	0.00207672
5q22.2-Del-Del	64 (23.4%)	16 (11.5%)	35 (24.5%)	19 (11.2%)	0.000376882
6p25.3-Del-Del	20 ( 7.3%)	14 (10.1%)	8 ( 5.6%)	12 ( 7.1%)	0.604195
6q23.3-Del-Del	19 (6.9%)	8 (5.8%)	12 (8.4%)	9 (5.3%)	0.677566
6q26-Del-Del	25 (9.1%)	9 (6.5%)	13 (9.1%)	12 (7.1%)	0.739678
7p14.1-Del-Del	9 (3.3%)	4 (2.9%)	5 (3.5%)	3 (1.8%)	0.801216
8p23.2-Del-Del	112 (40.9%)	47 (33.8%)	66 (46.2%)	41 (24.3%)	0.000113101
8p21.2-Del-Del	114 (41.6%)	49 (35.3%)	67 (46.9%)	40 (23.7%)	3.97286e-05
8p12-Del-Del	74 (27.0%)	36 (25.9%)	39 (27.3%)	29 (17.2%)	0.116507
8p11.21-Del-Del	47 (17.2%)	20 (14.4%)	26 (18.2%)	13 ( 7.7%)	0.0293445
10q21.1-Del-Del	37 (13.5%)	10 ( 7.2%)	15 (10.5%)	17 (10.1%)	0.295522
10q23.31-Del-Del	48 (17.5%)	12 ( 8.6%)	16 (11.2%)	16 ( 9.5%)	0.0343746
10q25.3-Del-Del	45 (16.4%)	11 ( 7.9%)	16 (11.2%)	15 ( 8.9%)	0.0456453
10q26.2-Del-Del	37 (13.5%)	10 ( 7.2%)	15 (10.5%)	20 (11.8%)	0.291714
12p11.22-Del-Del	21 (7.7%)	6 (4.3%)	5 (3.5%)	5 (3.0%)	0.139185
14q21.2-Del-Del	79 (28.8%)	24 (17.3%)	36 (25.2%)	18 (10.7%)	6.09602e-05
15q12-Del-Del	91 (33.2%)	36 (25.9%)	41 (28.7%)	31 (18.3%)	0.0147148
15q21.1-Del-Del	85 (31.0%)	35 (25.2%)	37 (25.9%)	30 (17.8%)	0.0433817
15q22.33-Del-Del	85 (31.0%)	33 (23.7%)	37 (25.9%)	21 (12.4%)	0.000353199
16p13.3-Del-Del	61 (22.3%)	27 (19.4%)	32 (22.4%)	35 (20.7%)	0.857069
16q23.1-Del-Del	16 ( 5.8%)	11 ( 7.9%)	14 ( 9.8%)	19 (11.2%)	0.124642
16q23.3-Del-Del	19 (6.9%)	7 (5.0%)	9 (6.3%)	6 (3.6%)	0.539459
17p12-Del-Del	151 (55.1%)	55 (39.6%)	73 (51.0%)	51 (30.2%)	7.8833e-07
18p11.31-Del-Del	158 (57.7%)	56 (40.3%)	75 (52.4%)	47 (27.8%)	1.39398e-09
18q12.3-Del-Del	179 (65.3%)	59 (42.4%)	91 (63.6%)	58 (34.3%)	1.77441e-13
18q21.2-Del-Del	187 (68.2%)	62 (44.6%)	94 (65.7%)	59 (34.9%)	1.906e-15
18q22.1-Del-Del	186 (67.9%)	61 (43.9%)	91 (63.6%)	59 (34.9%)	1.73069e-14
19p13.3-Del-Del	27 (9.9%)	8 (5.8%)	13 (9.1%)	5 (3.0%)	0.0447211
20p12.1-Del-Del	78 (28.5%)	24 (17.3%)	28 (19.6%)	38 (22.5%)	0.0619661
21q11.2-Del-Del	65 (23.7%)	22 (15.8%)	36 (25.2%)	27 (16.0%)	0.0510633
22q13.31-Del-Del	73 (26.6%)	31 (22.3%)	30 (21.0%)	24 (14.2%)	0.0465505

## Sheet: Supplementary file 2c
Mutation
oncogenic pathway	C1	C2	C3	C4	pvalue
Cell_cycle	11 ( 4.9%)	6 ( 5.3%)	5 ( 4.5%)	25 (20.3%)	1.13714e-06
HIPPO	96 (42.7%)	56 (49.6%)	46 (41.8%)	72 (58.5%)	0.0210513
MYC	18 ( 8.0%)	13 (11.5%)	9 ( 8.2%)	32 (26.0%)	7.55411e-06
NOTCH	90 (40.0%)	48 (42.5%)	41 (37.3%)	77 (62.6%)	0.000126146
NRF2	5 (2.2%)	5 (4.4%)	3 (2.7%)	9 (7.3%)	0.107987
PI3K	84 (37.3%)	45 (39.8%)	43 (39.1%)	75 (61.0%)	0.000149241
TGFB	58 (25.8%)	37 (32.7%)	27 (24.5%)	53 (43.1%)	0.00345616
RTK_RAS	16 ( 7.1%)	16 (14.2%)	8 ( 7.3%)	46 (37.4%)	6.8185e-14
TP53	157 (69.8%)	71 (62.8%)	78 (70.9%)	77 (62.6%)	0.319181
WNT	208 (92.4%)	92 (81.4%)	93 (84.5%)	106 (86.2%)	0.0199068
Amplification
oncogenic pathway	C1	C2	C3	C4	pvalue
Cell_cycle	216 (91.1%)	101 (84.9%)	108 (93.1%)	90 (65.7%)	3.44435e-11
HIPPO	222 (93.7%)	102 (85.7%)	109 (94.0%)	104 (75.9%)	8.29657e-07
MYC	183 (77.2%)	82 (68.9%)	97 (83.6%)	86 (62.8%)	0.0006472
NOTCH	222 (93.7%)	102 (85.7%)	109 (94.0%)	103 (75.2%)	3.12726e-07
NRF2	61 (25.7%)	18 (15.1%)	19 (16.4%)	13 ( 9.5%)	0.000699009
PI3K	203 (85.7%)	88 (73.9%)	100 (86.2%)	90 (65.7%)	7.89617e-06
TGFB	96 (40.5%)	31 (26.1%)	33 (28.4%)	41 (29.9%)	0.0161036
RTK_RAS	208 (87.8%)	97 (81.5%)	105 (90.5%)	94 (68.6%)	2.99918e-06
TP53	98 (41.4%)	32 (26.9%)	47 (40.5%)	40 (29.2%)	0.0115987
WNT	208 (87.8%)	92 (77.3%)	101 (87.1%)	93 (67.9%)	8.22269e-06
Deletion
oncogenic pathway	C1	C2	C3	C4	pvalue
Cell_cycle	107 (45.1%)	34 (28.6%)	46 (39.7%)	38 (27.7%)	0.00125891
HIPPO	181 (76.4%)	71 (59.7%)	93 (80.2%)	69 (50.4%)	1.82341e-08
MYC	182 (76.8%)	69 (58.0%)	89 (76.7%)	65 (47.4%)	2.5598e-09
NOTCH	192 (81.0%)	83 (69.7%)	103 (88.8%)	78 (56.9%)	4.43415e-09
NRF2	26 (11.0%)	8 ( 6.7%)	8 ( 6.9%)	8 ( 5.8%)	0.257935
PI3K	173 (73.0%)	71 (59.7%)	90 (77.6%)	63 (46.0%)	2.71095e-08
TGFB	190 (80.2%)	74 (62.2%)	96 (82.8%)	65 (47.4%)	2.48743e-12
RTK_RAS	138 (58.2%)	50 (42.0%)	64 (55.2%)	44 (32.1%)	4.06814e-06
TP53	168 (70.9%)	62 (52.1%)	77 (66.4%)	59 (43.1%)	2.98268e-07
WNT	203 (85.7%)	78 (65.5%)	105 (90.5%)	76 (55.5%)	8.09332e-14

## Sheet: Supplementary file 2d
C1 vs. the remaining subtypes									C2 vs. the other subtypes									C3 vs. the remaining subtypes									C4 vs. the remaining subtypes									C1 vs. C2 subtype									C1 vs. C3 subtype
gene	logFC	AveExpr	t	P.Value	adj.P.Val	B	type		gene	logFC	AveExpr	t	P.Value	adj.P.Val	B	type		gene	logFC	AveExpr	t	P.Value	adj.P.Val	B	type		gene	logFC	AveExpr	t	P.Value	adj.P.Val	B	type			logFC	AveExpr	t	P.Value	adj.P.Val	B	type			logFC	AveExpr	t	P.Value
LAPTM5	-1.35239	9.24589	-33.7633	1.58495e-185	3.42699e-181	413.594	protein_coding		LTB	0.438724	6.16466	21.5359	1.20585e-89	1.30364e-85	193.489	protein_coding		MSRB3	0.898847	6.2673	23.7141	1.5054e-105	1.84956e-101	229.984	protein_coding		GBP4	1.05338	5.53378	26.649	5.30607e-128	1.14728e-123	281.157	protein_coding		SASH3	-1.17224	6.4122	-33.3058	7.36202e-155	1.59182e-150	343.258	protein_coding		TIMP2	-1.51948	8.82666	-32.6239	2.58575e-153
HCLS1	-1.37413	7.31942	-32.8118	1.13177e-177	1.22355e-173	395.568	protein_coding		CD79A	0.756759	6.47797	21.4637	3.94104e-89	2.84044e-85	192.312	protein_coding		HMCN1	1.28674	5.13766	23.7066	1.71082e-105	1.84956e-101	229.857	protein_coding		IFNG	0.813659	4.59415	26.0529	2.32548e-123	2.51408e-119	270.54	protein_coding		AIF1	-0.926725	7.21695	-31.8646	6.27078e-146	6.77934e-142	322.776	protein_coding		SFRP2	-3.29261	7.42048	-32.176	1.89623e-150
TYROBP	-1.47059	8.05028	-31.3813	6.21347e-166	4.47825e-162	368.622	protein_coding		IL16	0.342367	5.49497	21.2097	2.49608e-87	1.34925e-83	188.188	protein_coding		CALD1	0.810287	6.57643	23.624	7.07301e-105	5.09775e-101	228.445	protein_coding		IRF1	1.01406	8.12977	25.9986	6.12508e-123	4.41455e-119	269.578	protein_coding		LST1	-0.992838	6.85823	-31.4251	3.38627e-143	2.4406e-139	316.509	protein_coding		RAB31	-1.83066	8.62584	-32.1579	2.47552e-150
C1QA	-1.41104	8.19092	-30.5495	3.74829e-159	1.71018e-155	353.058	protein_coding		PARPBP	-0.639663	4.99804	-21.0694	2.43917e-86	1.05479e-82	185.922	protein_coding		COL8A1	0.973344	5.03863	23.3358	9.80357e-103	5.29932e-99	223.536	protein_coding		GNLY	1.37307	5.74073	25.2294	5.17806e-117	2.799e-113	256.022	protein_coding		TRBC1	-1.60821	7.58231	-30.7889	3.09677e-139	1.37724e-135	307.423	TR_C_gene		DDR2	-1.33816	6.71272	-31.8631	1.91339e-148
CSF1R	-0.984783	7.40051	-30.5466	3.95472e-159	1.71018e-155	353.005	protein_coding		MTFR2	-0.556779	5.48247	-20.7733	2.92093e-84	1.05261e-80	181.166	protein_coding		ASPN	1.83156	6.93389	23.2572	3.74256e-102	1.56743e-98	222.203	protein_coding		IDO1	1.80585	7.11584	24.707	5.00494e-113	2.16433e-109	246.907	protein_coding		LSP1	-1.00036	6.89791	-30.787	3.18482e-139	1.37724e-135	307.395	protein_coding		EFEMP2	-1.26482	7.48994	-31.5008	4.01621e-146
EVI2B	-1.45807	6.92851	-30.5263	5.78727e-159	2.08554e-155	352.625	protein_coding		SASH3	0.803063	6.51626	20.7105	8.02198e-84	2.47787e-80	180.162	protein_coding		FERMT2	1.22543	6.55497	23.2484	4.34955e-102	1.56743e-98	222.054	protein_coding		GZMA	1.72447	6.28968	24.6583	1.17348e-112	4.22882e-109	246.061	protein_coding		CSF1R	-1.20582	7.20806	-30.7441	5.89349e-139	2.12382e-135	306.782	protein_coding		AEBP1	-1.82238	8.4855	-31.419	1.34455e-145
IL10RA	-1.05969	6.58681	-30.4266	3.73552e-158	1.15385e-154	350.766	protein_coding		TTK	-0.95703	7.74894	-20.0161	5.08987e-79	1.37567e-75	169.171	protein_coding		SPOCK1	1.75487	6.73948	23.078	7.8922e-101	2.43779e-97	219.169	protein_coding		STAT1	1.03127	8.51752	23.6442	5.00161e-105	1.54492e-101	228.61	protein_coding		NCKAP1L	-0.801103	5.93079	-30.1163	4.84708e-135	1.49719e-131	297.801	protein_coding		SERPING1	-1.77613	7.83047	-31.0294	4.2473e-143
MAFB	-1.24856	7.92314	-30.2485	1.03967e-156	2.80996e-153	347.451	protein_coding		KIF18A	-0.873396	5.99002	-19.98	8.99093e-79	2.16002e-75	168.606	protein_coding		FBN1	1.31898	6.89866	23.0025	2.84018e-100	6.87736e-97	217.895	protein_coding		LAG3	0.710236	4.86459	23.4597	1.18068e-103	3.19108e-100	225.47	protein_coding		TRAC	-1.10315	7.25025	-29.9914	2.91499e-134	7.8785e-131	296.013	TR_C_gene		SPOCK1	-2.20715	6.75587	-30.7945	1.36574e-141
C1QC	-1.41274	8.62757	-30.1586	5.56829e-156	1.33775e-152	345.778	protein_coding		PTGDS	0.999811	7.88907	19.8679	5.24602e-78	1.13429e-74	166.853	protein_coding		ZNF521	1.07201	4.88745	23.002	2.86265e-100	6.87736e-97	217.887	protein_coding		TAP1	0.990116	9.09299	23.4359	1.77367e-103	4.26115e-100	225.065	protein_coding		ARHGAP9	-0.913023	6.01376	-29.6969	2.00924e-132	4.82709e-129	291.796	protein_coding		C1R	-1.56767	8.75293	-30.7251	3.81409e-141
CD14	-1.35193	8.39751	-29.8979	7.18728e-154	1.55403e-150	340.933	protein_coding		CENPF	-0.529319	5.79904	-19.8382	8.36563e-78	1.64438e-74	166.389	protein_coding		COL5A2	1.38102	9.18673	22.8301	5.25261e-99	1.13572e-95	214.991	protein_coding		NKG7	1.07996	5.97842	22.7967	9.23432e-99	1.81513e-95	214.278	protein_coding		LCP1	-1.30797	7.94474	-29.4699	5.25679e-131	1.13662e-127	288.544	protein_coding		FBN1	-1.68494	6.89542	-30.4593	1.9404e-139
HLA-DPA1	-1.56842	8.99496	-29.7685	7.99289e-153	1.57111e-149	338.531	protein_coding		HELLS	-0.667262	5.81493	-19.7695	2.45669e-77	4.42655e-74	165.319	protein_coding		PXDN	1.09728	8.02561	22.5903	2.98193e-97	5.86139e-94	210.972	protein_coding		CXCL10	1.94066	8.20341	22.5378	7.21182e-97	1.29945e-93	209.949	protein_coding		IL10RA	-1.27683	6.37211	-29.2286	1.69085e-129	3.32359e-126	285.086	protein_coding		HEG1	-1.02559	7.671	-30.3208	1.50456e-138
HLA-DPB1	-0.937296	7.14	-29.7037	2.6668e-152	4.80513e-149	337.33	protein_coding		KIF14	-0.921295	6.4453	-19.6882	8.75436e-77	1.45605e-73	164.056	protein_coding		PRKD1	0.548652	4.07028	22.5557	5.33585e-97	9.61432e-94	210.393	protein_coding		CXCL9	1.97773	7.82829	22.3876	8.94375e-96	1.48755e-92	207.448	protein_coding		LY86	-0.978191	6.7145	-29.106	9.85509e-129	1.77572e-125	283.329	protein_coding		FNDC1	-2.41545	6.36056	-30.1917	1.01625e-137
SERPING1	-1.53111	8.10414	-29.6144	1.40183e-151	2.33157e-148	335.676	protein_coding		RAD54B	-0.840361	6.63667	-19.6222	2.45187e-76	3.78674e-73	163.032	protein_coding		COL5A1	1.33039	8.47945	22.4854	1.73613e-96	2.88758e-93	209.219	protein_coding		PSMB9	1.08692	9.53941	22.3504	1.66577e-95	2.57266e-92	206.831	protein_coding		HLA-DPB1	-1.12178	6.94731	-29.0865	1.30496e-128	2.17044e-125	283.05	protein_coding		SULF1	-2.07015	8.96443	-30.127	2.64569e-137
ITGB2	-0.927747	6.78884	-29.4473	3.11407e-150	4.80946e-147	332.585	protein_coding		CHEK1	-0.657926	6.36566	-19.6032	3.29892e-76	4.75528e-73	162.738	protein_coding		FNDC1	1.89762	6.36002	22.4777	1.97721e-96	3.05366e-93	209.089	protein_coding		CXCR6	0.589343	5.75312	22.2719	6.17922e-95	8.90714e-92	205.528	protein_coding		CD52	-1.64706	7.07594	-28.7762	1.13269e-126	1.74936e-123	278.603	protein_coding		MSRB3	-1.11384	6.28567	-29.9273	5.07372e-136
SLA	-0.8603	7.14456	-29.3682	1.35144e-149	1.94805e-146	331.122	protein_coding		MND1	-1.01964	6.23285	-19.5706	5.48066e-76	7.2081e-73	162.233	protein_coding		SPARC	1.25332	10.2214	22.4233	4.9178e-96	7.08884e-93	208.183	protein_coding		TAP2	0.575755	6.33441	21.8758	4.46356e-92	6.03195e-89	198.99	protein_coding		SLA	-1.02916	6.96753	-28.7161	2.68747e-126	3.8739e-123	277.742	protein_coding		ZEB2	-0.668845	4.37891	-29.8158	2.6416e-135
HLA-DRA	-1.70763	10.6324	-29.33	2.74168e-149	3.70504e-146	330.417	protein_coding		BRCA1	-0.540717	6.91021	-19.5685	5.66727e-76	7.2081e-73	162.2	protein_coding		ZFPM2	1.1639	4.5959	22.4159	5.56662e-96	7.52259e-93	208.059	protein_coding		UBE2L6	0.97181	9.01712	21.8427	7.71465e-92	9.81213e-89	198.447	protein_coding		CD48	-0.780882	5.78239	-28.6541	6.55799e-126	8.86231e-123	276.853	protein_coding		GLT8D2	-1.54979	6.65999	-29.7631	5.76517e-135
FCER1G	-1.49152	7.53669	-29.0853	2.54573e-147	3.23786e-144	325.9	protein_coding		TPSAB1	0.910886	6.79058	19.5511	7.42913e-76	8.92403e-73	161.931	protein_coding		MAP1B	0.921124	5.92338	22.4015	7.08314e-96	9.00893e-93	207.819	protein_coding		CCL5	1.3248	7.29651	21.134	8.54282e-87	1.02618e-83	186.911	protein_coding		HCLS1	-1.59712	7.01949	-28.6259	9.83588e-126	1.25101e-122	276.449	protein_coding		MGP	-1.80924	6.32549	-29.6949	1.58086e-134
HCK	-1.03582	6.97057	-29.0159	9.17851e-147	1.10254e-143	324.622	protein_coding		CD48	0.54762	5.84166	19.4968	1.72755e-75	1.96595e-72	161.092	protein_coding		CDH11	1.11619	6.80245	22.374	1.12156e-95	1.34724e-92	207.362	protein_coding		USP30-AS1	0.484925	5.34983	21.0377	4.08299e-86	4.64644e-83	185.357	lncRNA		CD3D	-1.06677	7.58726	-28.5742	2.07111e-125	2.48787e-122	275.707	protein_coding		CNRIP1	-1.199	6.46895	-29.6856	1.81327e-134
WIPF1	-0.735245	5.85586	-28.8649	1.4906e-145	1.62964e-142	321.843	protein_coding		DEPDC1B	-0.894575	6.4426	-19.4875	1.99661e-75	2.15853e-72	160.948	protein_coding		STON1	0.737961	5.18992	22.2764	5.72962e-95	6.5203e-92	205.739	protein_coding		CD247	0.726367	6.00333	20.955	1.55627e-85	1.68249e-82	184.028	protein_coding		CD2	-1.33509	6.78683	-28.3537	4.93393e-124	5.61481e-121	272.548	protein_coding		VIM	-1.21488	7.6126	-29.6548	2.86152e-134
HLA-DMB	-1.19445	8.58463	-28.8643	1.50739e-145	1.62964e-142	321.832	protein_coding		NUF2	-1.02664	7.19637	-19.4692	2.65222e-75	2.73078e-72	160.666	protein_coding		MPDZ	0.767257	5.76676	22.2183	1.51132e-94	1.63388e-91	204.774	protein_coding		APOL6	0.666587	6.53711	20.8339	1.10009e-84	1.13267e-81	182.086	protein_coding		C1QA	-1.62865	7.87876	-28.268	1.69335e-123	1.83069e-120	271.319	protein_coding		MXRA8	-1.18905	7.84379	-29.5743	9.41693e-134
ARHGEF6	-0.869466	6.80478	-28.7534	1.16566e-144	1.20019e-141	319.793	protein_coding		KIF23	-0.645231	5.4768	-19.4599	3.06252e-75	3.0099e-72	160.523	protein_coding		FIBIN	0.956013	5.90381	22.1536	4.44106e-94	4.5726e-91	203.701	protein_coding		CD96	0.446397	4.20204	20.7511	4.17999e-84	4.10817e-81	180.76	protein_coding		MPEG1	-1.63196	6.8044	-28.2527	2.10936e-123	2.17184e-120	271.101	protein_coding		SPARC	-1.60492	10.2161	-29.5389	1.58909e-133
CHST11	-0.78965	5.75898	-28.5995	1.98559e-143	1.92792e-140	316.967	protein_coding		ZNF367	-0.839344	7.55446	-19.3977	8.03552e-75	7.55409e-72	159.565	protein_coding		VCAN	1.46122	8.55644	22.0985	1.11093e-93	1.09185e-90	202.789	protein_coding		PSMB10	0.715598	9.10291	20.6887	1.13947e-83	1.0712e-80	179.764	protein_coding		EVI2B	-1.78501	6.64344	-28.1963	4.74742e-123	4.66585e-120	270.292	protein_coding		FERMT2	-1.53757	6.56863	-29.4398	6.88567e-133
RASSF2	-0.99945	6.4316	-28.5977	2.05079e-143	1.92792e-140	316.934	protein_coding		DNA2	-0.747434	6.68306	-19.3939	8.52751e-75	7.68258e-72	159.506	protein_coding		AEBP1	1.36887	8.53293	21.9378	1.59743e-92	1.50173e-89	200.136	protein_coding		GBP5	1.06357	5.66825	20.6079	4.16672e-83	3.75387e-80	178.477	protein_coding		MS4A6A	-1.0045	6.46791	-27.8931	3.71707e-121	3.49437e-118	265.948	protein_coding		BGN	-1.508	7.46088	-29.4376	7.11308e-133
C1QB	-1.50614	7.9458	-28.505	1.12925e-142	1.01736e-139	315.234	protein_coding		BIN2	0.518299	6.93959	19.3271	2.39524e-74	2.07159e-71	158.479	protein_coding		DDR2	1.00273	6.74939	21.916	2.29338e-92	2.06615e-89	199.776	protein_coding		GZMH	0.943479	5.60466	20.2359	1.57227e-80	1.30753e-77	172.584	protein_coding		LAPTM5	-1.49471	8.92237	-27.7509	2.87305e-120	2.58838e-117	263.91	protein_coding		COL6A2	-1.35515	7.83453	-29.3436	2.8581e-132
CSF2RB	-1.37385	6.63045	-28.5013	1.20914e-142	1.04576e-139	315.166	protein_coding		NCAPG	-0.841804	7.11591	-19.2207	1.23626e-73	1.02809e-70	156.849	protein_coding		MIR100HG	1.36712	4.61602	21.8829	3.96572e-92	3.42987e-89	199.231	lncRNA		CXCL11	2.29799	6.03488	20.1692	4.52928e-80	3.49757e-77	171.534	protein_coding		ARHGAP30	-0.674291	6.28523	-27.625	1.75571e-119	1.51848e-116	262.107	protein_coding		MAFB	-1.35769	7.66352	-29.2558	1.04793e-131
MPEG1	-1.28419	7.0335	-28.1155	1.43537e-139	1.19368e-136	308.109	protein_coding		MCM10	-0.674907	6.15964	-19.1675	2.80562e-73	2.24678e-70	156.034	protein_coding		COL1A2	1.39293	10.4623	21.8351	8.7485e-92	7.27539e-89	198.444	protein_coding		PSME1	0.476257	11.0543	20.1613	5.12951e-80	3.82449e-77	171.41	protein_coding		HLA-DMB	-1.35711	8.31247	-27.3925	4.96588e-118	3.97675e-115	258.776	protein_coding		COLEC12	-1.69831	5.88779	-29.2349	1.42757e-131
CD52	-1.26053	7.28424	-28.0927	2.18073e-139	1.74636e-136	307.692	protein_coding		RACGAP1	-0.619184	9.41176	-19.1446	3.99055e-73	3.08156e-70	155.684	protein_coding		SGCD	0.455655	5.02535	21.8192	1.1363e-91	9.09969e-89	198.184	protein_coding		CD274	0.696207	5.58891	20.1297	8.46595e-80	6.10169e-77	170.912	protein_coding		GIMAP4	-1.1616	6.85388	-27.3211	1.38536e-117	1.06979e-114	257.754	protein_coding		LGALS1	-1.37626	11.0544	-29.0868	1.27821e-130
GIMAP4	-0.954519	7.04306	-27.9704	2.04396e-138	1.57838e-135	305.461	protein_coding		PTPRCAP	0.58184	6.64651	19.0695	1.26291e-72	9.41611e-70	154.539	protein_coding		MEIS1	1.06114	5.69961	21.8138	1.24382e-91	9.60492e-89	198.094	protein_coding		IL2RB	0.743732	7.31487	19.8311	9.34521e-78	6.51813e-75	166.241	protein_coding		CD37	-0.682798	5.04577	-27.1377	1.92952e-116	1.43862e-113	255.13	protein_coding		TAGLN	-1.67731	9.05639	-29.083	1.35191e-130
PTPRC	-0.849402	5.51851	-27.7356	1.48642e-136	1.10825e-133	301.188	protein_coding		GPSM3	0.425275	6.95693	19.0447	1.84675e-72	1.33102e-69	154.162	protein_coding		HTRA1	1.19162	8.58186	21.6586	1.60728e-90	1.19836e-87	195.548	protein_coding		GBP1	0.934065	7.4996	19.5138	1.32662e-75	8.69217e-73	161.32	protein_coding		GYPC	-0.889154	7.1723	-26.9537	2.7112e-115	1.95405e-112	252.497	protein_coding		COL5A2	-1.71497	9.21278	-29.0123	3.84718e-130
LCP1	-1.01462	8.11893	-27.7323	1.57922e-136	1.1382e-133	301.128	protein_coding		DIAPH3	-0.467487	5.59747	-18.9446	8.53885e-72	5.95571e-69	152.64	protein_coding		TAGLN	1.28937	9.0776	21.6129	3.40825e-90	2.45644e-87	194.8	protein_coding		ETV7	0.55824	5.38983	19.4768	2.35586e-75	1.49819e-72	160.75	protein_coding		TBC1D10C	-0.670626	6.19574	-26.874	8.51824e-115	5.94133e-112	251.356	protein_coding		SERPINF1	-1.74606	8.82881	-29.012	3.86258e-130
LSP1	-0.772965	7.02918	-27.7085	2.43956e-136	1.69544e-133	300.695	protein_coding		SASS6	-0.505321	5.5132	-18.9197	1.24966e-71	8.44378e-69	152.262	protein_coding		COL3A1	1.23871	10.5382	21.5724	6.62444e-90	4.62044e-87	194.138	protein_coding		PARP9	0.640683	7.47323	19.3105	3.09342e-74	1.91103e-71	158.193	protein_coding		RASSF2	-1.19384	6.22528	-26.4573	3.36454e-112	2.27338e-109	245.399	protein_coding		VCAN	-1.8596	8.55706	-28.7737	1.31138e-128
CD53	-0.55059	5.80188	-27.7069	2.50921e-136	1.69544e-133	300.667	protein_coding		AIF1	0.612221	7.3172	18.9172	1.29765e-71	8.50235e-69	152.224	protein_coding		BNC2	0.662436	5.11079	21.5171	1.64225e-89	1.10965e-86	193.235	protein_coding		LAP3	0.673319	10.0832	19.1775	2.40575e-73	1.44492e-70	156.157	protein_coding		ARHGEF6	-1.03536	6.62412	-26.4434	4.10345e-112	2.68863e-109	245.201	protein_coding		TUBB6	-1.50642	8.05127	-28.7469	1.95041e-128
C1R	-1.25589	8.93285	-27.5993	1.78142e-135	1.1672e-132	298.713	protein_coding		BRCA2	-0.762939	5.71345	-18.9092	1.46627e-71	9.32464e-69	152.103	protein_coding		SULF1	1.55919	9.01511	21.4452	5.33749e-89	3.49719e-86	192.062	protein_coding		TIGIT	0.515688	4.82696	19.0421	1.92366e-72	1.12415e-69	154.092	protein_coding		GZMK	-1.38568	5.72862	-26.4257	5.28695e-112	3.36219e-109	244.948	protein_coding		FRMD6	-1.72102	7.02009	-28.5302	4.80771e-127
AIF1	-0.68297	7.3172	-27.5794	2.56165e-135	1.62906e-132	298.351	protein_coding		RAD18	-0.4389	5.43009	-18.8667	2.80263e-71	1.73139e-68	151.459	protein_coding		EFEMP2	0.940538	7.53011	21.4323	6.58703e-89	4.1852e-86	191.853	protein_coding		PSMB8	0.667217	9.93705	18.9895	4.30155e-72	2.44758e-69	153.293	protein_coding		ATP8B2	-0.74304	6.06881	-26.3075	2.87979e-111	1.72963e-108	243.259	protein_coding		CCDC80	-1.33905	5.91012	-28.5225	5.38631e-127
SLAMF8	-0.959081	6.25985	-27.5448	4.81191e-135	2.97266e-132	297.722	protein_coding		ASPM	-0.606454	5.79522	-18.831	4.82944e-71	2.90061e-68	150.919	protein_coding		COL6A3	1.23213	10.827	21.4306	6.77467e-89	4.1852e-86	191.825	protein_coding		BATF2	0.889514	7.48145	18.9834	4.72584e-72	2.62005e-69	153.2	protein_coding		CD74	-1.09663	7.97734	-26.2678	5.08957e-111	2.97423e-108	242.692	protein_coding		NR3C1	-1.1969	6.3355	-28.4415	1.78437e-126
NCKAP1L	-0.629374	6.0426	-27.5006	1.07456e-134	6.45391e-132	296.921	protein_coding		STIL	-0.793154	7.73658	-18.8131	6.3389e-71	3.70431e-68	150.648	protein_coding		MGP	1.38042	6.35628	21.4253	7.3937e-89	4.44074e-86	191.738	protein_coding		CRTAM	0.641689	3.75021	18.8583	3.1873e-71	1.72289e-68	151.305	protein_coding		TYROBP	-1.62031	7.69664	-26.2201	1.00752e-110	5.73281e-108	242.012	protein_coding		ZFPM2	-1.44946	4.61538	-28.3648	5.54554e-126
LY96	-1.49771	6.61496	-27.444	3.00885e-134	1.75831e-131	295.895	protein_coding		ATAD2	-0.788725	6.91211	-18.7828	1.00409e-70	5.7133e-68	150.191	protein_coding		PDLIM3	0.768658	5.59974	21.3907	1.30187e-88	7.60783e-86	191.175	protein_coding		HLA-DMA	1.26899	8.52591	18.4853	9.02457e-69	4.75925e-66	145.699	protein_coding		C1QC	-1.60464	8.30549	-26.2073	1.21097e-110	6.71375e-108	241.828	protein_coding		PCOLCE	-1.43178	8.16417	-28.3163	1.13716e-125
PLEKHO1	-0.922866	6.84812	-27.4014	6.52056e-134	3.7102e-131	295.124	protein_coding		TPSB2	1.24707	7.24231	18.7264	2.36638e-70	1.31195e-67	149.34	protein_coding		DZIP1	0.571877	4.57893	21.3033	5.42659e-88	3.08773e-85	189.754	protein_coding		TNFRSF9	0.283693	4.6189	18.3732	4.86285e-68	2.46139e-65	144.027	protein_coding		APBB1IP	-0.483057	5.21208	-26.1196	4.24938e-110	2.297e-107	240.577	protein_coding		COL6A3	-1.60771	10.8038	-28.3136	1.18255e-125
C1orf162	-1.1198	6.39238	-27.3422	1.91097e-133	1.05946e-130	294.052	protein_coding		PLK4	-0.588578	5.3369	-18.7084	3.10602e-70	1.67896e-67	149.069	protein_coding		GLT8D2	1.14004	6.71865	21.2736	8.81219e-88	4.88557e-85	189.272	protein_coding		GPR171	0.973152	5.16762	18.3727	4.89501e-68	2.46139e-65	144.021	protein_coding		TPSAB1	-1.22057	6.74155	-26.0079	2.10418e-109	1.08325e-106	238.984	protein_coding		CHST11	-0.851419	5.59187	-28.2847	1.8125e-125
SASH3	-0.828644	6.51626	-27.3104	3.40405e-133	1.84006e-130	293.477	protein_coding		E2F7	-0.562814	5.64296	-18.6785	4.88989e-70	2.57876e-67	148.618	protein_coding		COL12A1	0.978081	6.87125	21.2274	1.86999e-87	1.01082e-84	188.523	protein_coding		CD2	0.952681	6.95335	18.258	2.72282e-67	1.33802e-64	142.317	protein_coding		PTGDS	-1.30767	7.85554	-25.9575	4.32909e-109	2.17683e-106	238.265	protein_coding		THY1	-1.23578	8.22386	-28.2632	2.49076e-125
LST1	-0.732369	6.96607	-27.1991	2.5636e-132	1.31977e-129	291.464	protein_coding		LST1	0.655349	6.96607	18.6619	6.27913e-70	3.23255e-67	148.37	protein_coding		FRMD6	1.31245	7.04987	21.1723	4.58508e-87	2.41801e-84	187.631	protein_coding		NLRC3	0.711091	4.7413	18.1156	2.26934e-66	1.09039e-63	140.212	protein_coding		CCL5	-1.45815	7.0245	-25.9057	9.09522e-109	4.46947e-106	237.525	protein_coding		OLFML2B	-1.49442	7.02463	-28.2561	2.76575e-125
PPP1R18	-0.88691	8.03229	-27.0205	6.50181e-131	3.26935e-128	288.241	protein_coding		RAD51AP1	-0.872604	7.74441	-18.6468	7.89409e-70	3.87923e-67	148.143	protein_coding		IGFBP7	0.741465	8.90147	21.1415	7.57232e-87	3.84609e-84	187.132	protein_coding		THEMIS	0.52203	3.67333	17.9123	4.60306e-65	2.16364e-62	137.224	protein_coding		CD8A	-1.14148	6.5172	-25.8664	1.59593e-108	7.66825e-106	236.965	protein_coding		COL5A1	-1.6612	8.4991	-28.1913	7.21606e-125
EMP3	-1.07101	7.83932	-27.0104	7.79944e-131	3.83272e-128	288.06	protein_coding		BUB1B	-0.748343	8.40607	-18.6277	1.05445e-69	5.06652e-67	147.855	protein_coding		MAGI2-AS3	0.409073	4.10523	21.1408	7.64879e-87	3.84609e-84	187.122	lncRNA		CD3D	0.754358	7.67744	17.8803	7.37879e-65	3.39456e-62	136.756	protein_coding		RASSF5	-0.906659	6.58504	-25.8378	2.40189e-108	1.12899e-105	236.557	protein_coding		TSPYL5	-1.21269	5.38378	-28.1675	1.02498e-124
MS4A6A	-0.801445	6.61602	-26.9661	1.73933e-130	8.35727e-128	287.261	protein_coding		BRIP1	-0.718236	5.83932	-18.6034	1.52176e-69	7.15293e-67	147.49	protein_coding		AKT3	0.401109	4.81864	21.1382	7.98693e-87	3.92485e-84	187.079	protein_coding		CXCL13	1.93077	6.15663	17.8052	2.22837e-64	1.00379e-61	135.659	protein_coding		HCK	-1.17211	6.7328	-25.7649	6.81996e-108	3.13747e-105	235.518	protein_coding		CDH11	-1.4018	6.81411	-28.1229	1.98352e-124
EVL	-0.615548	6.46203	-26.949	2.36747e-130	1.11282e-127	286.953	protein_coding		WAS	0.366945	6.69604	18.5846	2.0227e-69	9.30527e-67	147.208	protein_coding		COL10A1	2.02916	6.80954	21.131	8.97346e-87	4.31165e-84	186.963	protein_coding		CD8A	0.916256	6.6496	17.761	4.26356e-64	1.88136e-61	135.015	protein_coding		PRKCB	-0.462783	4.7036	-25.7475	8.7377e-108	3.93597e-105	235.271	protein_coding		TSHZ3	-0.920296	5.78294	-28.066	4.59398e-124
APBB1IP	-0.394876	5.28941	-26.9051	5.22989e-130	2.40597e-127	286.163	protein_coding		CEP83	-0.615288	5.07749	-18.5459	3.62344e-69	1.63221e-66	146.628	protein_coding		CRISPLD1	1.11011	4.43144	21.1175	1.11752e-86	5.25284e-84	186.745	protein_coding		SH2D1A	0.303106	4.94449	17.7235	7.39514e-64	3.19795e-61	134.468	protein_coding		GMFG	-1.01354	6.95966	-25.7196	1.30396e-107	5.75392e-105	234.872	protein_coding		MIR100HG	-1.70199	4.63925	-28.0274	8.12894e-124
TRBC1	-1.19089	7.75995	-26.8489	1.44404e-129	6.50482e-127	285.151	TR_C_gene		ANLN	-0.943741	8.14899	-18.5286	4.7046e-69	2.07598e-66	146.369	protein_coding		PTPRM	0.75074	6.92097	21.093	1.66418e-86	7.65594e-84	186.348	protein_coding		IL12RB1	0.27145	5.42147	17.7187	7.92973e-64	3.3619e-61	134.399	protein_coding		ARHGAP25	-0.504451	5.52228	-25.6825	2.2152e-107	9.57941e-105	234.344	protein_coding		ISLR	-1.70989	6.90516	-28.0026	1.17243e-123
GIMAP6	-1.05133	5.9062	-26.7776	5.2227e-129	2.2585e-126	283.869	protein_coding		CD180	0.403413	5.82521	18.5008	7.14735e-69	3.0908e-66	145.954	protein_coding		DNM3OS	0.605884	4.52541	21.082	1.98831e-86	8.78942e-84	186.171	lncRNA		CTLA4	0.264326	4.91671	17.6593	1.89157e-63	7.8653e-61	133.536	protein_coding		TPSB2	-1.71604	7.14672	-25.6374	4.22099e-107	1.78953e-104	233.701	protein_coding		CLMP	-1.38115	5.68149	-27.992	1.37096e-123
NR3C1	-1.00609	6.50334	-26.7165	1.57233e-128	6.64114e-126	282.771	protein_coding		LY9	0.316549	4.73507	18.4927	8.07174e-69	3.4221e-66	145.833	protein_coding		C3orf80	0.910286	4.08434	21.0819	1.99187e-86	8.78942e-84	186.169	protein_coding		AIM2	1.14925	5.86595	17.4711	2.93512e-62	1.19742e-59	130.814	protein_coding		PARPBP	0.796202	4.99391	25.6178	5.58618e-107	2.32277e-104	233.422	protein_coding		GPC6	-1.1659	6.40581	-27.9733	1.80744e-123
GPNMB	-1.42931	6.7615	-26.7156	1.59717e-128	6.64114e-126	282.755	protein_coding		CLEC10A	0.629314	5.49123	18.4036	3.08138e-68	1.26564e-65	144.502	protein_coding		RAB31	1.30337	8.7281	21.0763	2.18089e-86	9.43105e-84	186.079	protein_coding		NLRC5	0.848567	8.02289	17.3899	9.51909e-62	3.81152e-59	129.646	protein_coding		RCSD1	-1.09199	5.73246	-25.4766	4.20168e-106	1.71413e-103	231.412	protein_coding		DCN	-1.1271	7.11169	-27.9716	1.85531e-123
CD74	-0.899405	8.15482	-26.5367	3.99657e-127	1.63045e-124	279.546	protein_coding		LY86	0.657517	6.81134	18.4031	3.10235e-68	1.26564e-65	144.495	protein_coding		SFRP2	2.43346	7.53645	21.0166	5.74384e-86	2.38833e-83	185.116	protein_coding		RASGRP1	0.935329	5.38295	17.2993	3.52308e-61	1.38502e-58	128.347	protein_coding		ITGB2	-1.00829	6.56063	-25.4332	7.81088e-106	3.12753e-103	230.794	protein_coding		BNC2	-0.859781	5.10106	-27.9551	2.3655e-123
C3AR1	-0.984024	7.60106	-26.519	5.49108e-127	2.19867e-124	279.229	protein_coding		SUV39H2	-0.502973	5.593	-18.3693	5.15638e-68	2.02711e-65	143.99	protein_coding		ISLR	1.3217	6.92125	20.9682	1.25772e-85	5.13103e-83	184.336	protein_coding		KLRD1	0.451637	5.20337	17.1671	2.36071e-60	9.11485e-58	126.46	protein_coding		HLA-DPA1	-1.70444	8.60911	-25.3069	4.73915e-105	1.86309e-102	228.997	protein_coding		ENTPD1	-0.957705	6.37755	-27.9153	4.26002e-123
CCL2	-1.43022	7.88815	-26.4746	1.21935e-126	4.79359e-124	278.434	protein_coding		ABI3	0.373706	6.9398	18.3612	5.81555e-68	2.24542e-65	143.871	protein_coding		SDC2	0.992487	7.16997	20.9457	1.81008e-85	7.24771e-83	183.974	protein_coding		APOL3	0.723161	6.63264	17.0459	1.33957e-59	5.08143e-57	124.737	protein_coding		EVL	-0.724512	6.331	-25.2025	2.10272e-104	8.11876e-102	227.513	protein_coding		TNS1	-0.950175	6.58733	-27.8664	8.77712e-123
TNFSF13B	-1.25438	7.00927	-26.3655	8.63551e-126	3.33423e-123	276.483	protein_coding		MASTL	-0.718188	6.38504	-18.3588	6.02722e-68	2.28364e-65	143.835	protein_coding		MXRA8	0.897711	7.87127	20.9342	2.18098e-85	8.57403e-83	183.788	protein_coding		TRIM69	0.304358	5.94083	16.9592	4.60806e-59	1.71785e-56	123.511	protein_coding		SLAMF7	-1.0954	5.71344	-25.1672	3.48069e-104	1.32034e-101	227.011	protein_coding		TGFB1I1	-1.4445	8.24589	-27.8611	9.48414e-123
SRGN	-1.0182	7.85007	-26.2497	6.87542e-125	2.60807e-122	274.415	protein_coding		KNTC1	-0.658209	6.76712	-18.3578	6.12577e-68	2.28364e-65	143.819	protein_coding		LTBP1	0.813795	7.72594	20.8837	4.928e-85	1.90274e-82	182.977	protein_coding		HLA-DMB	0.955964	8.58463	16.8764	1.49651e-58	5.48434e-56	122.342	protein_coding		BRCA1	0.699725	6.92361	25.0686	1.42051e-103	5.29556e-101	225.609	protein_coding		ANGPTL2	-1.13273	6.65326	-27.8319	1.46004e-122
ARHGAP9	-0.683084	6.11912	-26.1906	1.97883e-124	7.37694e-122	273.361	protein_coding		MCM6	-0.421028	7.0167	-18.3541	6.47013e-68	2.37114e-65	143.765	protein_coding		TCF4	0.858629	7.34857	20.8322	1.13145e-84	4.29197e-82	182.15	protein_coding		SAMD9L	0.824777	5.90924	16.8492	2.20027e-58	7.92902e-56	121.959	protein_coding		DOK2	-0.61191	6.02945	-24.9541	7.26537e-103	2.66257e-100	223.983	protein_coding		GPNMB	-1.62602	6.49317	-27.7713	3.57553e-122
C3	-1.69673	9.14328	-26.1039	9.32515e-124	3.41743e-121	271.816	protein_coding		SHCBP1	-0.815723	6.51689	-18.3204	1.07135e-67	3.8608e-65	143.264	protein_coding		TGFB1I1	1.10827	8.26579	20.8079	1.6741e-84	6.24092e-82	181.76	protein_coding		PRF1	0.672704	6.64986	16.7604	7.72367e-58	2.71663e-55	120.713	protein_coding		EMP3	-1.24573	7.60589	-24.891	1.78586e-102	6.43563e-100	223.087	protein_coding		COL8A1	-1.1473	5.09371	-27.7438	5.36689e-122
HLA-DMA	-1.37078	8.52591	-25.953	1.37957e-122	4.97151e-120	269.131	protein_coding		OIP5	-0.877923	7.1617	-18.3084	1.28261e-67	4.54634e-65	143.085	protein_coding		LAMA4	0.37435	5.56198	20.7906	2.21087e-84	8.10228e-82	181.484	protein_coding		FBXO6	0.92815	7.16139	16.7598	7.78979e-58	2.71663e-55	120.705	protein_coding		C1QB	-1.66853	7.58693	-24.782	8.4302e-102	2.98816e-99	221.541	protein_coding		COL3A1	-1.57407	10.5402	-27.6924	1.14697e-121
ATP8B2	-0.615086	6.19273	-25.9287	2.12714e-122	7.53984e-120	268.699	protein_coding		TRBC1	1.05781	7.75995	18.2965	1.53276e-67	5.34538e-65	142.908	TR_C_gene		TSHZ3	0.694385	5.80452	20.7895	2.24984e-84	8.10769e-82	181.466	protein_coding		CD3G	0.400193	5.2704	16.5797	9.82606e-57	3.37237e-54	118.189	protein_coding		PARVG	-0.446419	5.94712	-24.7588	1.17196e-101	4.08712e-99	221.212	protein_coding		CALD1	-0.977404	6.60894	-27.6911	1.16777e-121
ENTPD1	-0.774953	6.49244	-25.821	1.44959e-121	5.05534e-119	266.786	protein_coding		HAUS6	-0.697211	6.32682	-18.2702	2.27056e-67	7.7927e-65	142.518	protein_coding		BGN	1.15102	7.4862	20.7761	2.79396e-84	9.90346e-82	181.251	protein_coding		IL21R	0.380233	4.51946	16.5734	1.07389e-56	3.62806e-54	118.101	protein_coding		CD180	-0.543893	5.8014	-24.7513	1.30415e-101	4.47591e-99	221.106	protein_coding		HTRA1	-1.51405	8.58383	-27.55	9.38857e-121
ACP5	-0.978867	7.84006	-25.8101	1.75986e-121	6.03996e-119	266.593	protein_coding		DEPDC1	-0.828598	6.15955	-18.2605	2.6224e-67	8.85962e-65	142.374	protein_coding		DPYSL3	0.874451	6.01462	20.7564	3.83692e-84	1.3381e-81	180.935	protein_coding		IL15RA	0.432201	7.72435	16.4555	5.58105e-56	1.82839e-53	116.466	protein_coding		LAIR1	-0.704502	6.40575	-24.6856	3.32044e-101	1.12179e-98	220.175	protein_coding		VEGFC	-1.05118	5.74457	-27.4927	2.18746e-120
GMFG	-0.820659	7.11685	-25.7968	2.22978e-121	7.53318e-119	266.357	protein_coding		CDC6	-0.957806	6.62179	-18.1247	1.98401e-66	6.59973e-64	140.364	protein_coding		CACNA2D1	0.646998	5.37041	20.7219	6.68368e-84	2.29388e-81	180.383	protein_coding		NMI	0.498536	9.31673	16.3679	1.89104e-55	6.10269e-53	115.255	protein_coding		IL18BP	-0.47045	6.20748	-24.6125	9.39962e-101	3.12675e-98	219.138	protein_coding		ATP8B2	-0.741208	6.09393	-27.4849	2.45384e-120
SLC15A3	-0.769059	7.01072	-25.7868	2.66401e-121	8.86171e-119	266.18	protein_coding		TNFAIP8L2	0.393225	5.42857	18.1094	2.48814e-66	8.15131e-64	140.139	protein_coding		TIMP2	1.06764	8.92233	20.6743	1.43626e-83	4.85233e-81	179.622	protein_coding		TRDV3	0.395999	3.92115	16.3317	3.12504e-55	9.9367e-53	114.757	TR_V_gene		CD53	-0.635048	5.67991	-24.6106	9.6501e-101	3.13497e-98	219.112	protein_coding		GAS1	-1.5138	5.39087	-27.4551	3.80672e-120
CD86	-0.696798	5.46508	-25.6752	1.93463e-120	6.33797e-118	264.203	protein_coding		TBC1D10C	0.480957	6.23818	18.104	2.69892e-66	8.70984e-64	140.058	protein_coding		INHBA	1.04308	6.80653	20.6463	2.24912e-83	7.36824e-81	179.176	protein_coding		HLA-DPA1	1.18656	8.99496	16.1558	3.55798e-54	1.11494e-51	112.343	protein_coding		CD14	-1.4836	8.07022	-24.6102	9.71433e-101	3.13497e-98	219.105	protein_coding		FAP	-1.8157	7.2842	-27.428	5.6809e-120
DOCK2	-0.467207	4.77059	-25.6466	3.21276e-120	1.03681e-117	263.698	protein_coding		CD27	0.790335	6.40978	18.0917	3.23709e-66	1.0293e-63	139.878	protein_coding		FBXL7	0.640116	5.98414	20.6347	2.71101e-83	8.74888e-81	178.99	protein_coding		ITGAL	0.574538	5.67875	16.0549	1.42316e-53	4.39595e-51	110.968	protein_coding		CD27	-1.07154	6.35933	-24.578	1.53409e-100	4.87797e-98	218.65	protein_coding		TCF4	-1.13031	7.32646	-27.3485	1.83601e-119
CTSL	-0.890925	8.97667	-25.556	1.60289e-119	5.09671e-117	262.096	protein_coding		SMC2	-0.67675	7.19546	-17.9982	1.29413e-65	4.05533e-63	138.501	protein_coding		SYNC	1.06022	4.97715	20.613	3.83736e-83	1.20248e-80	178.644	protein_coding		SIRPG	0.304653	4.63265	16.0443	1.64608e-53	5.01288e-51	110.824	protein_coding		C3AR1	-1.12404	7.37906	-24.4518	9.22947e-100	2.8107e-97	216.862	protein_coding		ZNF521	-1.31666	4.91639	-27.2645	6.33896e-119
TRAC	-0.812037	7.36897	-25.4837	5.77253e-119	1.80889e-116	260.819	TR_C_gene		GMPS	-0.381955	7.17924	-17.9659	2.08807e-65	6.44975e-63	138.026	protein_coding		THBS2	1.79315	8.74032	20.4474	5.43026e-82	1.67733e-79	176.008	protein_coding		DTX3L	0.427848	9.73223	16.0281	2.05559e-53	6.17304e-51	110.603	protein_coding		PLEKHO1	-0.994851	6.61813	-24.2814	1.03746e-98	3.11554e-96	214.451	protein_coding		CTSK	-1.52273	9.31129	-27.2362	9.62076e-119
C1S	-1.4107	8.75569	-25.3496	6.19672e-118	1.91408e-115	258.453	protein_coding		ARHGAP30	0.457235	6.34882	17.9613	2.23563e-65	6.80827e-63	137.958	protein_coding		VGLL3	0.899578	4.48186	20.438	6.30778e-82	1.92094e-79	175.859	protein_coding		LYSMD2	0.580971	8.46946	16.0039	2.86176e-53	8.4763e-51	110.275	protein_coding		C1R	-1.4198	8.64408	-24.236	1.97315e-98	5.84432e-96	213.811	protein_coding		ASPN	-2.18068	7.0245	-27.2201	1.21948e-118
MYO1F	-0.6619	6.78503	-25.3249	9.57497e-118	2.91591e-115	258.019	protein_coding		SPOCK2	0.41627	6.52821	17.9525	2.54535e-65	7.64384e-63	137.829	protein_coding		SFRP4	1.78419	6.12694	20.4246	7.81192e-82	2.34596e-79	175.646	protein_coding		BIRC3	0.758005	7.0446	15.9717	4.44441e-53	1.29861e-50	109.838	protein_coding		TNFAIP8L2	-0.532279	5.40401	-24.2229	2.37908e-98	6.95142e-96	213.624	protein_coding		GFPT2	-1.22096	5.62485	-27.2055	1.51451e-118
MS4A7	-1.0399	6.20249	-25.3238	9.77012e-118	2.93402e-115	257.999	protein_coding		FANCI	-0.600619	7.14192	-17.9397	3.07448e-65	9.10637e-63	137.641	protein_coding		GLI3	0.417821	5.37419	20.3928	1.29763e-81	3.84348e-79	175.141	protein_coding		BTN3A1	0.436164	7.41419	15.9581	5.34988e-53	1.54233e-50	109.654	protein_coding		PTPRCAP	-0.745786	6.63662	-24.2151	2.65673e-98	7.65917e-96	213.514	protein_coding		FBXL7	-0.84579	5.96579	-27.1791	2.23503e-118
LY86	-0.706997	6.81134	-25.2793	2.14365e-117	6.34931e-115	257.216	protein_coding		C1orf112	-0.722837	5.95612	-17.9117	4.64753e-65	1.35796e-62	137.231	protein_coding		TSPYL5	0.911775	5.41468	20.3648	2.02574e-81	5.91898e-79	174.698	protein_coding		CD7	0.418948	5.52713	15.9364	7.19291e-53	2.04638e-50	109.361	protein_coding		ADAP2	-0.626553	6.61947	-24.1925	3.66056e-98	1.03519e-95	213.195	protein_coding		C1S	-1.73688	8.54392	-27.1225	5.14938e-118
C1orf54	-0.768834	7.85577	-25.2582	3.11114e-117	9.09041e-115	256.845	protein_coding		WDHD1	-0.635312	4.66705	-17.8867	6.71674e-65	1.93639e-62	136.865	protein_coding		NOX4	0.708943	4.16587	20.3008	5.61077e-81	1.59626e-78	173.684	protein_coding		IL15	0.686706	5.3417	15.9343	7.40567e-53	2.07955e-50	109.332	protein_coding		CCL2	-1.65919	7.57483	-24.192	3.6865e-98	1.03519e-95	213.188	protein_coding		COX7A1	-1.18945	6.97691	-27.115	5.74609e-118
EVI2A	-1.17393	6.33703	-25.2558	3.24455e-117	9.35383e-115	256.803	protein_coding		TTF2	-0.419925	5.09171	-17.866	9.11072e-65	2.592e-62	136.562	protein_coding		PDGFC	1.12074	6.74254	20.2909	6.56802e-81	1.84433e-78	173.528	protein_coding		CASP1	1.07246	8.49061	15.8327	2.95122e-52	8.18093e-50	107.96	protein_coding		STAB1	-0.403762	5.69729	-24.0907	1.54986e-97	4.29629e-95	211.757	protein_coding		ANTXR1	-0.583292	6.1121	-27.048	1.54354e-117
CD2	-1.01817	6.95335	-25.1871	1.08988e-116	3.1007e-114	255.595	protein_coding		DERL3	0.399115	6.08366	17.865	9.24286e-65	2.59544e-62	136.548	protein_coding		NUAK1	0.914704	7.18802	20.2747	8.48714e-81	2.35268e-78	173.273	protein_coding		IL2RA	0.355727	5.32179	15.8051	4.29552e-52	1.17567e-49	107.588	protein_coding		DOCK2	-0.561785	4.67551	-24.0791	1.82734e-97	5.00137e-95	211.593	protein_coding		MITF	-0.889779	5.24847	-26.993	3.47097e-117
BASP1	-0.639907	6.69422	-25.1702	1.46721e-116	4.06718e-114	255.299	protein_coding		CCL19	1.22752	5.9991	17.8596	1.00212e-64	2.77793e-62	136.468	protein_coding		LUM	1.1588	8.78031	20.2408	1.45546e-80	3.98354e-78	172.736	protein_coding		HLA-E	0.433452	10.6518	15.6871	2.11854e-51	5.72588e-49	106.005	protein_coding		C3	-1.98836	8.77892	-24.0765	1.89468e-97	5.12083e-95	211.557	protein_coding		MFAP5	-1.8592	5.32014	-26.9857	3.8645e-117
ALOX5AP	-1.22237	8.14983	-25.1424	2.39609e-116	6.558e-114	254.81	protein_coding		CENPI	-0.373054	4.4606	-17.8306	1.53473e-64	4.2005e-62	136.044	protein_coding		FAP	1.41233	7.29455	20.2326	1.6576e-80	4.44638e-78	172.607	protein_coding		TRBC1	0.937607	7.75995	15.6526	3.37539e-51	9.01021e-49	105.543	TR_C_gene		RAD18	0.584136	5.45119	24.0332	3.497e-97	9.33483e-95	210.946	protein_coding		EMILIN1	-1.29533	6.71722	-26.9666	5.12332e-117
DPYD	-0.532396	4.70483	-25.1105	4.20012e-116	1.13519e-113	254.251	protein_coding		IGKC	0.795569	6.97635	17.7731	3.57367e-64	9.65875e-62	135.205	IG_C_gene		MITF	0.666333	5.27317	20.2323	1.6657e-80	4.44638e-78	172.602	protein_coding		GBP2	0.828604	7.70448	15.5407	1.51889e-50	4.00504e-48	104.051	protein_coding		P2RY13	-1.01881	4.88434	-23.9746	8.02886e-97	2.11707e-94	210.118	protein_coding		COL1A2	-1.71854	10.4953	-26.9633	5.38134e-117
VCAM1	-1.20377	7.35199	-25.0621	9.85669e-116	2.63113e-113	253.401	protein_coding		NCAPG2	-0.664022	7.67602	-17.7693	3.77577e-64	1.0079e-61	135.15	protein_coding		TUBA1A	0.918968	10.3329	20.2198	2.02896e-80	5.28556e-78	172.406	protein_coding		IFIT3	0.971649	7.63226	15.5393	1.5477e-50	4.03186e-48	104.032	protein_coding		ITGAL	-0.774914	5.54799	-23.9678	8.83878e-97	2.30256e-94	210.022	protein_coding		NDN	-1.34607	6.9972	-26.9297	8.82737e-117
DOCK10	-0.485387	4.35337	-25.047	1.28365e-115	3.38478e-113	253.137	protein_coding		TRAC	0.729547	7.36897	17.7631	4.13752e-64	1.09099e-61	135.059	TR_C_gene		BICC1	0.63593	5.20098	20.1999	2.78214e-80	7.16135e-78	172.092	protein_coding		ICOS	0.395754	4.9997	15.5256	1.85894e-50	4.785e-48	103.85	protein_coding		LILRB1	-0.707803	6.6324	-23.9631	9.44499e-97	2.43118e-94	209.956	protein_coding		EMP3	-1.20504	7.63287	-26.907	1.23295e-116
MAF	-0.410776	4.83722	-25.0331	1.63943e-115	4.27082e-113	252.894	protein_coding		GUSBP11	0.417345	7.22441	17.6746	1.51151e-63	3.93758e-61	133.772	lncRNA		OLFML2B	1.10966	7.07332	20.163	4.99803e-80	1.27138e-77	171.509	protein_coding		HLA-DRA	1.25826	10.6324	15.4951	2.79563e-50	7.11143e-48	103.446	protein_coding		BTK	-0.712439	5.77066	-23.9139	1.89597e-96	4.8229e-94	209.262	protein_coding		SPARCL1	-1.73016	9.1507	-26.8976	1.4173e-116
TIMP2	-1.09526	8.92233	-25.0232	1.95313e-115	5.02745e-113	252.719	protein_coding		NAPSB	0.550661	4.71378	17.6598	1.87731e-63	4.8323e-61	133.557	transcribed_unprocessed_pseudogene		ZNF532	0.83162	6.72671	20.1612	5.13842e-80	1.29189e-77	171.481	protein_coding		CD38	0.684945	5.94235	15.3964	1.04395e-49	2.62468e-47	102.139	protein_coding		MFAP4	-1.17752	6.45179	-23.8789	3.11152e-96	7.82293e-94	208.768	protein_coding		IGFBP7	-0.963344	8.88999	-26.8901	1.58084e-116
CD37	-0.504614	5.12054	-25.0128	2.34452e-115	5.96391e-113	252.537	protein_coding		IGHM	1.26074	7.49118	17.654	2.0455e-63	5.20328e-61	133.472	IG_C_gene		GJA1	1.12481	8.8647	20.0992	1.37089e-79	3.40705e-77	170.505	protein_coding		ITK	0.66537	5.45814	15.3708	1.46697e-49	3.64584e-47	101.802	protein_coding		CCR5	-0.797564	7.07767	-23.8456	4.98152e-96	1.23805e-93	208.299	protein_coding		GLI3	-0.542733	5.36779	-26.8863	1.67361e-116
CCL5	-1.25174	7.29651	-24.924	1.11482e-114	2.77065e-112	250.983	protein_coding		MAP4K1	0.392491	5.87245	17.6368	2.62982e-63	6.61186e-61	133.222	protein_coding		THY1	0.921921	8.26085	20.0207	4.73651e-79	1.16378e-76	169.272	protein_coding		CCL4	0.940975	7.70042	15.3443	2.08802e-49	5.13037e-47	101.451	protein_coding		IL2RB	-0.829365	7.18789	-23.6963	4.11026e-95	1.00991e-92	206.197	protein_coding		CSF1R	-0.95742	7.15013	-26.8445	3.0952e-116
MS4A4A	-1.06918	6.24772	-24.9196	1.20461e-114	2.95979e-112	250.906	protein_coding		CCR7	0.772894	5.84562	17.5849	5.60638e-63	1.39335e-60	132.47	protein_coding		PRRX1	1.08873	5.67568	19.9933	7.29872e-79	1.77318e-76	168.841	protein_coding		PARP14	0.319493	6.25836	15.2739	5.30657e-49	1.2892e-46	100.526	protein_coding		CSF2RB	-1.53982	6.30966	-23.6741	5.62748e-95	1.36716e-92	205.884	protein_coding		MEIS1	-1.32196	5.7171	-26.843	3.16699e-116
PECAM1	-0.671858	7.02898	-24.8381	5.03729e-114	1.22378e-111	249.48	protein_coding		CD3D	0.736506	7.67744	17.5795	6.06073e-63	1.48915e-60	132.393	protein_coding		TNS1	0.725638	6.60299	19.9639	1.15855e-78	2.78335e-76	168.382	protein_coding		APOBEC3G	0.485281	6.69941	15.2546	6.85577e-49	1.64706e-46	100.272	protein_coding		FBLN5	-1.09606	6.65073	-23.6039	1.5155e-94	3.64091e-92	204.897	protein_coding		IL1R1	-0.829179	5.94227	-26.8255	4.09453e-116
LAIR1	-0.573955	6.51728	-24.7797	1.40094e-113	3.36567e-111	248.46	protein_coding		FBXO5	-0.610078	6.98531	-17.5744	6.53188e-63	1.58688e-60	132.318	protein_coding		RUNX1T1	0.439884	4.62034	19.9515	1.4087e-78	3.34712e-76	168.187	protein_coding		APOL1	0.74805	7.75494	15.2303	9.44781e-49	2.24484e-46	99.9543	protein_coding		SLAMF8	-1.00217	6.00918	-23.5568	2.9474e-94	7.00315e-92	204.234	protein_coding		PLXDC2	-1.27315	5.74194	-26.779	8.12488e-116
LCP2	-0.577145	5.09574	-24.7686	1.70112e-113	4.04194e-111	248.267	protein_coding		CKAP2L	-0.598267	7.07832	-17.559	8.17137e-63	1.96313e-60	132.096	protein_coding		PDGFRB	0.862662	7.60965	19.9451	1.55727e-78	3.62056e-76	168.087	protein_coding		CD80	0.223875	4.51584	15.2077	1.27402e-48	2.99422e-46	99.6578	protein_coding		GPSM3	-0.55287	6.94479	-23.5083	5.84392e-94	1.37345e-91	203.552	protein_coding		MAGI2-AS3	-0.5193	4.10618	-26.7061	2.37653e-115
RCSD1	-0.838084	5.87208	-24.7051	5.1657e-113	1.21405e-110	247.16	protein_coding		CD52	1.05016	7.28424	17.5509	9.19188e-63	2.18403e-60	131.979	protein_coding		LGALS1	0.986267	11.1264	19.9393	1.70609e-78	3.92436e-76	167.997	protein_coding		TRAT1	0.508947	3.83569	15.2012	1.38759e-48	3.22607e-46	99.5731	protein_coding		MTFR2	0.65537	5.45505	23.5041	6.20423e-94	1.44245e-91	203.492	protein_coding		STON1	-0.906086	5.21001	-26.6964	2.74286e-115
GLIPR2	-0.876897	6.72761	-24.6272	2.01841e-112	4.6927e-110	245.802	protein_coding		ARHGAP9	0.594872	6.11912	17.4999	1.93204e-62	4.4919e-60	131.241	protein_coding		TMEM47	1.17242	6.8643	19.909	2.74854e-78	6.25569e-76	167.522	protein_coding		IGSF6	0.554264	4.49721	15.0892	6.05678e-48	1.39319e-45	98.1117	protein_coding		CHST11	-0.794226	5.54124	-23.488	7.78603e-94	1.7721e-91	203.266	protein_coding		NEXN	-1.69149	5.85279	-26.657	4.89973e-115
FPR3	-0.974615	6.33014	-24.6134	2.56645e-112	5.90339e-110	245.562	protein_coding		LYL1	0.321449	6.89153	17.4885	2.28077e-62	5.24625e-60	131.076	protein_coding		VIM	0.850829	7.69121	19.8964	3.35265e-78	7.55115e-76	167.325	protein_coding		TYMP	0.6016	6.32538	15.0488	1.0289e-47	2.34177e-45	97.5862	protein_coding		CD4	-0.341002	5.30532	-23.4716	9.80453e-94	2.20827e-91	203.036	protein_coding		PXDN	-1.31618	8.07407	-26.6546	5.07282e-115
SERPINF1	-1.32534	8.98181	-24.5931	3.66051e-112	8.33131e-110	245.208	protein_coding		IGLL5	1.39448	8.60696	17.4315	5.21238e-62	1.18634e-59	130.255	protein_coding		SOX11	0.484181	4.17167	19.8941	3.47619e-78	7.74868e-76	167.289	protein_coding		ASPHD2	0.654189	6.27895	14.9649	3.08046e-47	6.9381e-45	96.4988	protein_coding		A2M	-0.6602	7.46439	-23.4648	1.08004e-93	2.40748e-91	202.94	protein_coding		PPP1R18	-0.998735	7.86166	-26.6508	5.36864e-115
CD163	-1.02745	6.13115	-24.5884	3.96949e-112	8.94045e-110	245.127	protein_coding		CCT6A	-0.43366	10.0715	-17.4268	5.58164e-62	1.25715e-59	130.187	protein_coding		TIMP3	1.12948	8.12147	19.8647	5.51203e-78	1.21613e-75	166.83	protein_coding		SOCS1	0.282083	5.07689	14.9143	5.95697e-47	1.32785e-44	95.8448	protein_coding		SERPING1	-1.59854	7.70345	-23.4587	1.17747e-93	2.59789e-91	202.854	protein_coding		LAYN	-0.416391	4.23721	-26.6429	6.02864e-115
TMEM140	-0.748747	6.5521	-24.573	5.19528e-112	1.15807e-109	244.859	protein_coding		MIS18A	-0.584457	6.88021	-17.4221	5.97562e-62	1.33201e-59	130.12	protein_coding		PCOLCE	1.05408	8.21773	19.8542	6.50993e-78	1.4218e-75	166.664	protein_coding		JAK2	0.557585	5.20878	14.8969	7.46957e-47	1.64803e-44	95.6205	protein_coding		DNA2	0.956383	6.69472	23.4536	1.26489e-93	2.76258e-91	202.783	protein_coding		PALLD	-0.958418	7.55856	-26.6194	8.5188e-115
RASSF5	-0.686667	6.69505	-24.5437	8.66032e-112	1.90639e-109	244.35	protein_coding		RFC4	-0.56541	8.58367	-17.4188	6.26648e-62	1.38259e-59	130.072	protein_coding		PKD2	0.942786	6.75588	19.8218	1.08223e-77	2.3324e-75	166.159	protein_coding		BTN2A2	0.214997	4.95628	14.8678	1.09105e-46	2.38291e-44	95.2448	protein_coding		NAPSB	-0.758208	4.67128	-23.3691	4.15936e-93	8.99337e-91	201.597	transcribed_unprocessed_pseudogene		PRRX1	-1.41259	5.65999	-26.6107	9.68976e-115
FGL2	-1.25155	7.20701	-24.5433	8.72874e-112	1.90639e-109	244.342	protein_coding		CENPE	-0.779868	6.82583	-17.3848	1.02433e-61	2.23718e-59	129.584	protein_coding		RBMS3	0.44538	4.31613	19.8213	1.0895e-77	2.3324e-75	166.152	protein_coding		EOMES	0.561772	5.46755	14.8614	1.18536e-46	2.56298e-44	95.1626	protein_coding		C1orf162	-1.20773	6.11352	-23.3671	4.28306e-93	9.16915e-91	201.567	protein_coding		RASSF2	-1.02591	6.1993	-26.5681	1.81233e-114
RAB31	-1.29939	8.7281	-24.541	9.08593e-112	1.96456e-109	244.302	protein_coding		CD37	0.449929	5.12054	17.3262	2.39059e-61	5.16893e-59	128.742	protein_coding		PRICKLE2	0.821229	5.9409	19.8187	1.13568e-77	2.40743e-75	166.111	protein_coding		TRAC	0.632044	7.36897	14.8223	1.96742e-46	4.21184e-44	94.6602	TR_C_gene		TMEM140	-0.901152	6.40002	-23.3561	5.00025e-93	1.05995e-90	201.413	protein_coding		SDC2	-1.26656	7.16831	-26.4984	5.05801e-114
THEMIS2	-0.802204	6.2004	-24.4796	2.65102e-111	5.67528e-109	243.235	protein_coding		GYPC	0.606969	7.25295	17.2778	4.80945e-61	1.0296e-58	128.048	protein_coding		EMILIN1	0.957129	6.763	19.8035	1.44063e-77	2.99818e-75	165.874	protein_coding		LAMP3	0.792563	6.95858	14.7368	5.94587e-46	1.26041e-43	93.5636	protein_coding		MAFB	-1.29283	7.59247	-23.3534	5.19338e-93	1.09021e-90	201.375	protein_coding		AOC3	-1.6378	6.73453	-26.4616	8.68266e-114
FCGR1B	-1.14952	5.71521	-24.4621	3.59132e-111	7.61289e-109	242.932	protein_coding		SLAMF1	0.252611	4.90856	17.269	5.45901e-61	1.1572e-58	127.922	protein_coding		COL6A2	0.971782	7.90492	19.8035	1.4421e-77	2.99818e-75	165.873	protein_coding		HLA-DRB6	0.343363	5.69968	14.7248	6.94129e-46	1.45713e-43	93.4101	transcribed_unprocessed_pseudogene		SLC9A9	-0.465314	5.75864	-23.2815	1.42876e-92	2.97045e-90	200.367	protein_coding		DPYSL3	-1.11896	6.01135	-26.452	1.00076e-113
TSPAN4	-0.705332	6.83686	-24.4331	5.95485e-111	1.25006e-108	242.428	protein_coding		DDIAS	-0.647803	6.85573	-17.2523	6.94043e-61	1.45695e-58	127.684	protein_coding		CRYAB	1.08572	6.88417	19.7985	1.55822e-77	3.20876e-75	165.796	protein_coding		SLAMF7	0.709175	5.80987	14.6317	2.29696e-45	4.77547e-43	92.2236	protein_coding		IGHM	-1.68168	7.42818	-23.2233	3.24232e-92	6.67672e-90	199.551	IG_C_gene		OLFML1	-1.07948	5.86123	-26.4497	1.03431e-113
HEG1	-0.747322	7.74077	-24.3624	2.03704e-110	4.23509e-108	241.203	protein_coding		IGLJ3	0.928939	7.14688	17.2022	1.42562e-60	2.93569e-58	126.969	IG_J_gene		LAMC1	0.542708	8.96549	19.7839	1.96047e-77	3.99898e-75	165.568	protein_coding		MMP12	1.21754	10.228	14.6073	3.13998e-45	6.46596e-43	91.9136	protein_coding		GIMAP6	-1.18185	5.66201	-23.2048	4.2051e-92	8.57761e-90	199.291	protein_coding		CTHRC1	-2.1149	9.5284	-26.4265	1.45515e-113
ENPP2	-1.23388	7.18289	-24.329	3.64279e-110	7.50137e-108	240.623	protein_coding		CCDC138	-0.369693	5.08372	-17.1997	1.47889e-60	3.01666e-58	126.932	protein_coding		PALLD	0.702815	7.59652	19.7649	2.63832e-77	5.33138e-75	165.272	protein_coding		IKZF3	0.310925	4.84996	14.5916	3.84224e-45	7.83745e-43	91.7135	protein_coding		GIMAP1	-0.498622	4.77509	-23.1848	5.57144e-92	1.12585e-89	199.011	protein_coding		LUM	-1.52705	8.74952	-26.3429	4.97895e-113
FLI1	-0.453143	4.86712	-24.3071	5.32581e-110	1.08637e-107	240.245	protein_coding		NUP54	-0.207833	5.0145	-17.1705	2.24755e-60	4.54174e-58	126.517	protein_coding		DKK3	0.554004	5.73623	19.7423	3.75796e-77	7.52358e-75	164.92	protein_coding		IKZF1	0.197001	4.66465	14.5793	4.49992e-45	9.0932e-43	91.5569	protein_coding		ZNF367	1.02605	7.53721	23.1806	5.9109e-92	1.18339e-89	198.952	protein_coding		THBS2	-2.22163	8.77721	-26.2546	1.82335e-112
MSN	-0.482593	6.98721	-24.2816	8.28943e-110	1.67509e-107	239.804	protein_coding		BARD1	-0.439444	6.80397	-17.1639	2.47383e-60	4.95271e-58	126.422	protein_coding		NAP1L3	0.957367	4.20004	19.7302	4.54149e-77	9.00883e-75	164.732	protein_coding		TGFBI	-0.770378	11.7781	-14.5726	4.89884e-45	9.74838e-43	91.4727	protein_coding		CENPF	0.671865	5.80386	23.1722	6.65311e-92	1.31976e-89	198.834	protein_coding		PDGFRB	-1.11846	7.59771	-26.2132	3.35191e-112
NCF2	-1.20038	6.27741	-24.2252	2.2094e-109	4.38908e-107	238.827	protein_coding		KPNA2	-0.488555	10.5506	-17.1275	4.16633e-60	8.1949e-58	125.904	protein_coding		TUBB6	1.08205	8.12816	19.7044	6.80055e-77	1.33674e-74	164.33	protein_coding		KLHDC7B	0.35638	5.27066	14.5724	4.91431e-45	9.74838e-43	91.4695	protein_coding		RAD54B	1.06081	6.64061	23.1674	7.11785e-92	1.39911e-89	198.767	protein_coding		LAPTM5	-1.25752	8.87901	-26.1846	5.09971e-112
VIM	-0.878982	7.69121	-24.2251	2.2126e-109	4.38908e-107	238.825	protein_coding		KIF11	-0.834488	7.49538	-17.1275	4.16908e-60	8.1949e-58	125.903	protein_coding		GPC6	0.857725	6.44989	19.7005	7.22889e-77	1.40814e-74	164.27	protein_coding		MICB	0.922509	6.84806	14.5371	7.71091e-45	1.51569e-42	91.0229	protein_coding		BASP1	-0.766956	6.56307	-23.1261	1.27354e-91	2.48076e-89	198.187	protein_coding		CRYAB	-1.39768	6.8751	-26.0787	2.416e-111
CD84	-0.370889	5.22391	-24.2118	2.78513e-109	5.47455e-107	238.596	protein_coding		BTK	0.487512	5.83434	17.1139	5.06219e-60	9.86078e-58	125.71	protein_coding		ANTXR1	0.445048	6.12201	19.6924	8.20059e-77	1.58315e-74	164.144	protein_coding		TLR8	0.548586	4.68593	14.4712	1.78662e-44	3.4802e-42	90.1899	protein_coding		MAP4K1	-0.505941	5.86397	-23.1203	1.38075e-91	2.66559e-89	198.107	protein_coding		AKT3	-0.503299	4.8231	-26.0456	3.92571e-111
TRIM22	-1.27202	8.53371	-24.1708	5.67084e-109	1.10464e-106	237.887	protein_coding		OTUD6B	-0.733768	7.08499	-17.0813	8.06882e-60	1.55771e-57	125.247	protein_coding		HEG1	0.713785	7.74077	19.6629	1.29997e-76	2.48743e-74	163.686	protein_coding		BTN3A3	0.762645	6.55892	14.443	2.55764e-44	4.91528e-42	89.8343	protein_coding		IGLV1-44	-1.39982	7.09003	-23.0951	1.9675e-91	3.76472e-89	197.754	IG_V_gene		IGFBP5	-0.864403	6.34908	-25.9555	1.47528e-110
ITGAM	-1.02523	6.22752	-24.1579	7.08761e-109	1.36829e-106	237.665	protein_coding		KIF15	-0.778387	6.82599	-17.0476	1.30663e-59	2.47824e-57	124.769	protein_coding		ADAMTS5	0.66619	5.28201	19.645	1.72023e-76	3.2627e-74	163.407	protein_coding		IFIH1	0.392764	5.01828	14.4427	2.5688e-44	4.91528e-42	89.8299	protein_coding		IL16	-0.41967	5.50127	-23.0928	2.03201e-91	3.85404e-89	197.722	protein_coding		PTPRM	-0.939248	6.93096	-25.9485	1.63479e-110
ADAP2	-0.516668	6.72268	-24.145	8.87334e-109	1.69787e-106	237.441	protein_coding		KIF4A	-0.668659	7.89812	-17.0252	1.79968e-59	3.38371e-57	124.451	protein_coding		POSTN	1.01703	6.70739	19.5993	3.50761e-76	6.59492e-74	162.699	protein_coding		USP18	0.733536	6.2812	14.4197	3.43713e-44	6.51909e-42	89.5413	protein_coding		GAS7	-0.616193	5.88452	-23.0208	5.58866e-91	1.05076e-88	196.714	protein_coding		TUBA1A	-1.19403	10.3187	-25.9392	1.87252e-110
ZEB2	-0.521797	4.44662	-24.0947	2.11901e-108	4.01905e-106	236.574	protein_coding		DONSON	-0.587255	7.09043	-17.0212	1.9048e-59	3.55048e-57	124.394	protein_coding		EFS	0.48401	5.60209	19.5918	3.93765e-76	7.33964e-74	162.583	protein_coding		SAMHD1	0.511152	7.04989	14.3546	7.84971e-44	1.47588e-41	88.7226	protein_coding		CALHM2	-0.736726	6.40394	-23.004	7.08385e-91	1.32041e-88	196.478	protein_coding		ADAM12	-1.00524	5.54119	-25.8637	5.6722e-110
RFTN1	-0.46228	6.05903	-24.0854	2.48739e-108	4.67673e-106	236.414	protein_coding		IGLV1-44	1.03122	7.15693	17.0039	2.43768e-59	4.50492e-57	124.149	IG_V_gene		CYS1	0.679652	4.36971	19.565	5.97691e-76	1.10455e-73	162.168	protein_coding		PBX1	-0.620372	7.24366	-14.3405	9.38535e-44	1.7494e-41	88.5455	protein_coding		RHOH	-0.807817	5.2485	-23.0025	7.23041e-91	1.3362e-88	196.457	protein_coding		MAP1B	-1.09571	5.96955	-25.8636	5.6758e-110
VSIG4	-1.13082	6.8923	-23.9816	1.49698e-107	2.79032e-105	234.625	protein_coding		NUP35	-0.490438	8.42503	-16.9821	3.3274e-59	6.09703e-57	123.84	protein_coding		COX7A1	0.890542	7.01008	19.5544	7.04969e-76	1.29177e-73	162.004	protein_coding		FASLG	0.270402	4.30235	14.3369	9.81837e-44	1.81447e-41	88.5008	protein_coding		TTK	1.15428	7.71939	22.9893	8.7065e-91	1.59536e-88	196.272	protein_coding		AXL	-0.795165	6.76363	-25.7736	2.1243e-109
APOE	-1.16296	7.94201	-23.97	1.82946e-107	3.38091e-105	234.425	protein_coding		LSP1	0.631838	7.02918	16.9697	3.97269e-59	7.21828e-57	123.664	protein_coding		PLN	1.55642	5.59261	19.5178	1.24554e-75	2.26312e-73	161.438	protein_coding		PYHIN1	0.226446	4.04197	14.3165	1.26989e-43	2.32692e-41	88.2457	protein_coding		PECAM1	-0.775877	6.8805	-22.9741	1.07692e-90	1.95674e-88	196.06	protein_coding		GNB4	-0.739526	5.92618	-25.7534	2.86038e-109
MRC1	-1.47238	7.19334	-23.9613	2.12495e-107	3.8937e-105	234.276	protein_coding		DTL	-0.691814	7.68665	-16.9525	5.07118e-59	9.13742e-57	123.422	protein_coding		FSTL1	0.767921	7.63301	19.5143	1.3158e-75	2.37086e-73	161.383	protein_coding		TNFSF13B	0.923938	7.00927	14.2926	1.71671e-43	3.11921e-41	87.9469	protein_coding		AXL	-0.774137	6.72824	-22.9044	2.86807e-90	5.16779e-88	195.084	protein_coding		PLEKHO1	-0.994906	6.65276	-25.6972	6.51269e-109
ARHGAP30	-0.482436	6.34882	-23.9339	3.40996e-107	6.19581e-105	233.805	protein_coding		WDR43	-0.586217	7.99828	-16.944	5.72482e-59	1.02299e-56	123.301	protein_coding		MFAP2	1.07266	7.9724	19.5044	1.53533e-75	2.74354e-73	161.23	protein_coding		TRG-AS1	0.390787	4.74972	14.2699	2.28589e-43	4.11879e-41	87.6631	lncRNA		IGLL5	-1.86403	8.53478	-22.8961	3.21985e-90	5.75368e-88	194.969	protein_coding		FSTL1	-1.01368	7.61158	-25.6785	8.56446e-109
PLEKHO2	-0.514045	7.35733	-23.8813	8.44866e-107	1.52231e-104	232.901	protein_coding		SCARA5	0.579482	5.21966	16.9409	5.98503e-59	1.06072e-56	123.257	protein_coding		CTHRC1	1.65275	9.5346	19.4713	2.5663e-75	4.54823e-73	160.719	protein_coding		CCR5	0.537559	7.18843	14.2619	2.52954e-43	4.52015e-41	87.5627	protein_coding		WIPF1	-0.773671	5.66567	-22.8758	4.28369e-90	7.59196e-88	194.685	protein_coding		COL10A1	-2.46754	6.87908	-25.5889	3.18607e-108
CD300LF	-0.724012	6.08349	-23.8803	8.60616e-107	1.53787e-104	232.882	protein_coding		RHOG	0.415265	8.50667	16.8981	1.09902e-58	1.91636e-56	122.654	protein_coding		MCC	0.602855	5.39282	19.4691	2.6569e-75	4.67053e-73	160.684	protein_coding		IL18RAP	0.394474	5.34611	14.2303	3.7611e-43	6.66578e-41	87.1695	protein_coding		CD84	-0.410878	5.13554	-22.8563	5.62884e-90	9.89485e-88	194.413	protein_coding		EFEMP1	-1.25607	5.97821	-25.572	4.08169e-108
GIMAP8	-0.514494	4.63597	-23.8211	2.38607e-106	4.22881e-104	231.866	protein_coding		EZH2	-0.724215	7.87387	-16.896	1.13266e-58	1.95923e-56	122.624	protein_coding		TCEAL7	0.958456	4.46617	19.4634	2.901e-75	5.05849e-73	160.597	protein_coding		PSMB8-AS1	0.333487	6.04983	14.1466	1.07502e-42	1.88976e-40	86.1285	lncRNA		CD3E	-0.776965	6.05997	-22.8156	9.95292e-90	1.7355e-87	193.845	protein_coding		CACNA2D1	-0.816931	5.37455	-25.556	5.15811e-108
SLC31A2	-0.757856	6.78132	-23.811	2.83988e-106	4.99219e-104	231.692	protein_coding		SMC4	-0.470218	7.65761	-16.8896	1.24044e-58	2.12864e-56	122.533	protein_coding		AOC3	1.25192	6.76064	19.4616	2.98366e-75	5.16102e-73	160.569	protein_coding		IFI35	0.534444	8.03766	14.1299	1.3251e-42	2.3106e-40	85.9212	protein_coding		PTPRC	-0.93141	5.31261	-22.8137	1.02273e-89	1.76908e-87	193.818	protein_coding		CFH	-1.42653	5.97331	-25.5456	6.00879e-108
CLEC2B	-0.741653	5.81926	-23.7111	1.58204e-105	2.75863e-103	229.981	protein_coding		CDC23	-0.44266	6.42672	-16.8428	2.4095e-58	4.10222e-56	121.874	protein_coding		SLIT2	1.0548	5.39358	19.3555	1.54478e-74	2.60946e-72	158.933	protein_coding		OAS2	0.696079	6.09285	14.1142	1.61138e-42	2.7873e-40	85.7273	protein_coding		HLA-DRA	-1.84652	10.2089	-22.7821	1.59258e-89	2.73291e-87	193.377	protein_coding		SYNC	-1.33409	4.98668	-25.5345	7.06172e-108
CALHM2	-0.621715	6.53446	-23.6944	2.11128e-105	3.65201e-103	229.693	protein_coding		SLC9A9	0.341611	5.78181	16.8405	2.48897e-58	4.20442e-56	121.842	protein_coding		CLMP	0.987539	5.75544	19.3455	1.80255e-74	3.0213e-72	158.78	protein_coding		TFAP2A-AS1	0.36458	5.54221	14.0947	2.0555e-42	3.52731e-40	85.4861	lncRNA		NCF1	-0.773151	5.6957	-22.7434	2.74125e-89	4.66704e-87	192.835	protein_coding		POSTN	-1.32621	6.68876	-25.4971	1.22168e-107
CD48	-0.536414	5.84166	-23.6679	3.32519e-105	5.70613e-103	229.241	protein_coding		LCP1	0.822897	8.11893	16.8229	3.19042e-58	5.34753e-56	121.595	protein_coding		SGIP1	0.53359	4.38737	19.3351	2.11625e-74	3.51981e-72	158.62	protein_coding		SLA2	0.219795	5.66288	14.0842	2.3443e-42	3.99121e-40	85.3558	protein_coding		CD300LF	-0.81682	5.9164	-22.7127	4.21283e-89	7.11639e-87	192.407	protein_coding		COL15A1	-1.69456	8.9432	-25.4737	1.72053e-107
FCGR2B	-1.13026	5.90642	-23.5972	1.11979e-104	1.90646e-102	228.03	protein_coding		CENPN	-0.440403	6.39273	-16.8004	4.38858e-58	7.29923e-56	121.279	protein_coding		VEGFC	0.774121	5.78371	19.3133	2.96335e-74	4.89111e-72	158.285	protein_coding		TBX21	0.253426	5.2965	14.0714	2.74884e-42	4.6434e-40	85.198	protein_coding		ACKR1	-1.1793	6.03051	-22.6988	5.11815e-89	8.57866e-87	192.213	protein_coding		C20orf194	-0.763731	5.84181	-25.469	1.84292e-107
CNRIP1	-0.896723	6.56538	-23.5701	1.77998e-104	3.00677e-102	227.569	protein_coding		DBF4	-0.67927	8.32849	-16.7844	5.50589e-58	9.06053e-56	121.053	protein_coding		DLC1	0.402443	5.11842	19.2603	6.71514e-74	1.09996e-71	157.472	protein_coding		SECTM1	0.750744	7.38258	14.0362	4.26366e-42	7.14642e-40	84.7629	protein_coding		FCER1G	-1.53189	7.13708	-22.638	1.19942e-88	1.99492e-86	191.365	protein_coding		GGT5	-0.766716	6.38593	-25.425	3.50876e-107
PLXNC1	-0.528431	5.35956	-23.5621	2.04234e-104	3.42321e-102	227.432	protein_coding		CHEK2	-0.497842	7.25841	-16.7841	5.53136e-58	9.06053e-56	121.049	protein_coding		PLXDC2	0.924043	5.79965	19.2131	1.39065e-73	2.26079e-71	156.748	protein_coding		PLA2G7	0.801901	6.8308	13.97	9.70006e-42	1.61334e-39	83.9483	protein_coding		IGLJ3	-1.22998	7.10623	-22.6215	1.50996e-88	2.49224e-86	191.136	IG_J_gene		LOXL1	-1.55978	7.02688	-25.3461	1.11391e-106
CCR1	-0.785813	6.39494	-23.5213	4.11195e-104	6.83912e-102	226.734	protein_coding		NEK2	-0.707369	7.11628	-16.7185	1.39564e-57	2.26891e-55	120.13	protein_coding		COL11A1	1.4709	6.31769	19.1356	4.57867e-73	7.38806e-71	155.562	protein_coding		PTPRC	0.591649	5.51851	13.9396	1.41318e-41	2.3325e-39	83.5753	protein_coding		FGL2	-1.4924	6.9477	-22.6036	1.94086e-88	3.17919e-86	190.885	protein_coding		WIPF1	-0.711119	5.66744	-25.2618	3.82093e-106
NAGK	-0.461993	8.86193	-23.4409	1.62538e-103	2.68275e-101	225.365	protein_coding		FIGNL1	-0.65612	7.19278	-16.6948	1.94773e-57	3.14283e-55	119.799	protein_coding		COL15A1	1.26949	8.98987	19.1337	4.71694e-73	7.55479e-71	155.533	protein_coding		HAVCR2	0.333865	5.47544	13.9264	1.66437e-41	2.72629e-39	83.4132	protein_coding		MYO1F	-0.764395	6.63876	-22.5938	2.22459e-88	3.61654e-86	190.749	protein_coding		SNAI2	-1.52892	6.87256	-25.2348	5.67487e-106
MNDA	-1.29275	6.14636	-23.4239	2.17501e-103	3.56273e-101	225.074	protein_coding		CEP78	-0.468106	6.75685	-16.6873	2.16513e-57	3.46774e-55	119.694	protein_coding		MFAP5	1.40373	5.36304	19.1222	5.62973e-73	8.95045e-71	155.357	protein_coding		CIITA	0.194496	5.10486	13.9072	2.11026e-41	3.43069e-39	83.1779	protein_coding		SELPLG	-0.546184	6.52278	-22.5868	2.45257e-88	3.95742e-86	190.652	protein_coding		PKD2	-1.20305	6.75436	-25.2312	5.98207e-106
CTSK	-1.14914	9.44042	-23.3113	1.48706e-102	2.41754e-100	223.159	protein_coding		ARHGAP11A	-0.644763	4.66667	-16.6799	2.40324e-57	3.82079e-55	119.59	protein_coding		PCDH7	0.586525	4.64598	19.1136	6.42718e-73	1.01437e-70	155.225	protein_coding		MCM5	0.449277	7.69015	13.9054	2.15672e-41	3.48004e-39	83.1564	protein_coding		RACGAP1	0.780915	9.41422	22.5835	2.57059e-88	4.11714e-86	190.605	protein_coding		ARL4C	-0.986677	6.76424	-25.229	6.17575e-106
GBP2	-0.957509	7.70448	-23.2601	3.55781e-102	5.74082e-100	222.289	protein_coding		MFNG	0.294325	5.65757	16.6641	3.004e-57	4.74106e-55	119.369	protein_coding		COLEC12	1.19002	5.9972	19.1062	7.19974e-73	1.12806e-70	155.112	protein_coding		TIFA	0.348247	5.54377	13.8506	4.24351e-41	6.74655e-39	82.4857	protein_coding		NCAPG	1.02333	7.09499	22.5747	2.90506e-88	4.61862e-86	190.484	protein_coding		RBMS3	-0.561283	4.31962	-25.222	6.83847e-106
AXL	-0.637294	6.85506	-23.2554	3.85937e-102	6.18128e-100	222.208	protein_coding		KIF18B	-0.631257	7.59356	-16.6579	3.2759e-57	5.13271e-55	119.282	protein_coding		RAI14	0.855109	7.77724	19.097	8.2896e-73	1.28948e-70	154.972	protein_coding		PIK3AP1	0.65003	6.52024	13.8267	5.68936e-41	8.97922e-39	82.1951	protein_coding		ENPP2	-1.49789	6.937	-22.5182	6.40138e-88	1.0103e-85	189.696	protein_coding		CCL2	-1.57728	7.59962	-25.221	6.93731e-106
CTSB	-0.673583	10.1298	-23.2404	4.98308e-102	7.92237e-100	221.953	protein_coding		RFWD3	-0.619796	6.99362	-16.6538	3.47024e-57	5.3981e-55	119.225	protein_coding		LOXL1	1.15956	7.07666	19.0962	8.39222e-73	1.29612e-70	154.96	protein_coding		PML	0.22355	5.89907	13.8241	5.88094e-41	9.21432e-39	82.1623	protein_coding		LTB	-0.525623	6.18044	-22.5048	7.72819e-88	1.21086e-85	189.509	protein_coding		INHBA	-1.2488	6.85401	-25.2152	7.55155e-106
ITGAL	-0.643846	5.67875	-23.1692	1.67369e-101	2.6415e-99	220.746	protein_coding		ZWILCH	-0.618575	8.00155	-16.6193	5.63875e-57	8.70865e-55	118.743	protein_coding		LAYN	0.302639	4.25576	19.0846	1.00237e-72	1.53711e-70	154.783	protein_coding		CD3E	0.495601	6.12509	13.7703	1.13743e-40	1.76932e-38	81.5086	protein_coding		BIN2	-0.656433	6.93579	-22.4986	8.42485e-88	1.31052e-85	189.423	protein_coding		TYROBP	-1.38584	7.65874	-25.2018	9.19162e-106
COLEC12	-1.22801	5.9972	-23.1353	2.9799e-101	4.66895e-99	220.171	protein_coding		MAD2L1	-0.717685	7.84164	-16.6154	5.95454e-57	9.13115e-55	118.689	protein_coding		GAS1	1.12322	5.44082	19.0771	1.12419e-72	1.71177e-70	154.669	protein_coding		BST2	1.06767	8.16303	13.7361	1.73087e-40	2.6732e-38	81.0926	protein_coding		MGAT1	-0.501656	8.22847	-22.4881	9.7487e-88	1.50562e-85	189.277	protein_coding		MCC	-0.77538	5.38819	-25.1787	1.28771e-105
GIMAP1	-0.404684	4.85304	-23.1144	4.24695e-101	6.60629e-99	219.818	protein_coding		ARHGAP25	0.336689	5.57412	16.6082	6.58882e-57	1.00326e-54	118.589	protein_coding		PARVA	0.397204	6.9072	19.0644	1.36554e-72	2.05176e-70	154.475	protein_coding		UBASH3A	0.295939	4.22032	13.5574	1.52417e-39	2.30458e-37	78.9371	protein_coding		IKZF1	-0.292644	4.62193	-22.4874	9.85509e-88	1.51125e-85	189.267	protein_coding		C3	-1.8912	8.80903	-25.1489	1.99071e-105
ICAM1	-0.693704	6.93023	-23.1104	4.54899e-101	7.02559e-99	219.75	protein_coding		C5orf34	-0.571169	6.02616	-16.5614	1.27053e-56	1.90774e-54	117.937	protein_coding		FN1	1.10447	8.64777	19.0644	1.36645e-72	2.05176e-70	154.475	protein_coding		IL4I1	0.542087	6.14726	13.4802	3.87667e-39	5.78078e-37	78.0122	protein_coding		CD79A	-0.870129	6.52829	-22.4456	1.76721e-87	2.69089e-85	188.685	protein_coding		FIBIN	-1.14828	5.9451	-25.1126	3.3804e-105
CFH	-1.18299	6.16295	-23.0458	1.36026e-100	2.08593e-98	218.658	protein_coding		C4orf46	-0.696002	6.0858	-16.5323	1.9092e-56	2.82745e-54	117.532	protein_coding		SPARCL1	1.24479	9.23747	19.0547	1.58592e-72	2.36488e-70	154.327	protein_coding		CD300A	0.345636	5.52803	13.4412	6.20598e-39	9.1908e-37	77.546	protein_coding		CNRIP1	-1.04483	6.37061	-22.4379	1.96685e-87	2.97394e-85	188.578	protein_coding		MPDZ	-0.912914	5.80507	-25.0789	5.53247e-105
ARHGAP25	-0.367539	5.57412	-22.9336	9.11864e-100	1.38847e-97	216.762	protein_coding		CMSS1	-0.541155	8.4419	-16.503	2.87592e-56	4.23015e-54	117.125	protein_coding		ARMCX1	1.05023	6.41108	19.0405	1.97028e-72	2.91791e-70	154.111	protein_coding		TRAF3IP3	0.276074	4.53933	13.417	8.30295e-39	1.22127e-36	77.2576	protein_coding		VSIG4	-1.25597	6.62404	-22.4264	2.30855e-87	3.46636e-85	188.419	protein_coding		C1orf162	-1.07117	6.10063	-25.07	6.29806e-105
DCN	-0.822071	7.18888	-22.9115	1.32558e-99	2.00432e-97	216.389	protein_coding		DNAJC9	-0.35686	7.11377	-16.4792	4.00997e-56	5.85834e-54	116.795	protein_coding		FZD1	0.440614	5.04108	19.0018	3.56563e-72	5.2092e-70	153.521	protein_coding		SLAMF8	0.647512	6.25985	13.389	1.16168e-38	1.69715e-36	76.9249	protein_coding		HCST	-0.673188	6.54172	-22.4182	2.59119e-87	3.86391e-85	188.303	protein_coding		VGLL3	-1.12231	4.49571	-25.0461	8.93406e-105
GPR183	-0.941545	6.55339	-22.883	2.14653e-99	3.22307e-97	215.909	protein_coding		CD19	0.474494	5.23182	16.4747	4.26807e-56	6.19358e-54	116.733	protein_coding		PPP1R3C	0.498194	4.53678	18.9862	4.52462e-72	6.56587e-70	153.284	protein_coding		CDCA2	0.547229	6.53105	13.3396	2.09991e-38	3.04726e-36	76.3384	protein_coding		NAGK	-0.578841	8.77647	-22.3939	3.63316e-87	5.38057e-85	187.967	protein_coding		MAF	-0.472659	4.76225	-24.9764	2.47156e-104
CYBB	-0.478833	5.14908	-22.8776	2.35242e-99	3.50786e-97	215.818	protein_coding		SPC25	-0.821356	6.39044	-16.464	4.95472e-56	7.14206e-54	116.585	protein_coding		EDNRA	0.992566	6.48831	18.9222	1.20271e-71	1.73367e-69	152.311	protein_coding		CD300LF	0.537308	6.08349	13.3288	2.39012e-38	3.44527e-36	76.2102	protein_coding		DEPDC1B	1.05792	6.40166	22.3919	3.73911e-87	5.4998e-85	187.938	protein_coding		SFRP4	-2.17259	6.18632	-24.9666	2.85154e-104
LGALS1	-0.969288	11.1264	-22.6728	7.44582e-98	1.1027e-95	212.375	protein_coding		NAA15	-0.324018	5.48704	-16.4633	5.00463e-56	7.16624e-54	116.575	protein_coding		ANGPTL2	0.814974	6.71005	18.8823	2.20876e-71	3.16277e-69	151.707	protein_coding		IFIT5	0.479369	7.58192	13.2922	3.69944e-38	5.2973e-36	75.7774	protein_coding		HELLS	0.795399	5.78838	22.3214	1.00028e-86	1.46135e-84	186.958	protein_coding		SLIT2	-1.36348	5.38142	-24.9606	3.11203e-104
HCST	-0.545637	6.64648	-22.6661	8.3301e-98	1.21846e-95	212.263	protein_coding		HMMR	-0.76242	8.08658	-16.4587	5.3388e-56	7.59444e-54	116.511	protein_coding		COL4A2	0.864731	9.34973	18.8552	3.34039e-71	4.75171e-69	151.295	protein_coding		TYMS	0.47568	7.41406	13.2728	4.66345e-38	6.63376e-36	75.548	protein_coding		FEZ1	-0.54094	5.63425	-22.2824	1.7218e-86	2.49858e-84	186.417	protein_coding		PDLIM3	-0.959125	5.61149	-24.9569	3.28554e-104
IFI16	-1.06963	8.22787	-22.6661	8.34019e-98	1.21846e-95	212.262	protein_coding		CPNE5	0.564054	5.6788	16.4503	5.99733e-56	8.47544e-54	116.396	protein_coding		ITGA5	0.901629	7.70894	18.8243	5.34477e-71	7.55324e-69	150.828	protein_coding		CARD16	0.380414	5.50424	13.2556	5.72087e-38	8.08475e-36	75.3456	protein_coding		PPP1R16B	-0.547388	5.08374	-22.2526	2.61016e-86	3.76246e-84	186.002	protein_coding		ITGAM	-1.13409	6.02208	-24.8883	8.93844e-104
ARL4C	-0.77294	6.86619	-22.6367	1.36616e-97	1.9825e-95	211.77	protein_coding		MZB1	1.02511	6.49568	16.4415	6.7829e-56	9.52337e-54	116.273	protein_coding		MXRA7	0.623203	7.13201	18.8176	5.91602e-71	8.30625e-69	150.727	protein_coding		PARP12	0.538083	8.43906	13.233	7.4885e-38	1.0514e-35	75.0789	protein_coding		CCL19	-1.62724	5.94418	-22.2478	2.79201e-86	3.99794e-84	185.935	protein_coding		FBLN1	-0.911996	6.41818	-24.8503	1.55563e-103
APOL3	-0.757245	6.63264	-22.6307	1.51106e-97	2.17815e-95	211.67	protein_coding		SRSF10	-0.377184	8.17671	-16.4358	7.34759e-56	1.02497e-53	116.194	protein_coding		NDN	0.972129	7.06189	18.8167	6.00443e-71	8.32967e-69	150.712	protein_coding		IRF9	0.527297	9.16763	13.1983	1.1306e-37	1.57715e-35	74.6708	protein_coding		RHOG	-0.569487	8.47606	-22.1914	6.12246e-86	8.70921e-84	185.153	protein_coding		ZNF532	-1.01083	6.75548	-24.8169	2.53221e-103
PLA2G7	-0.99619	6.8308	-22.6225	1.73426e-97	2.48332e-95	211.533	protein_coding		MPEG1	1.01192	7.0335	16.4305	7.90717e-56	1.09595e-53	116.121	protein_coding		COL1A1	0.910284	9.29179	18.8166	6.00975e-71	8.32967e-69	150.711	protein_coding		TFEC	0.416616	3.78458	13.1926	1.21077e-37	1.67816e-35	74.603	protein_coding		CPA3	-1.83349	6.73305	-22.1549	1.01812e-85	1.43882e-83	184.646	protein_coding		HMCN1	-1.43517	5.25923	-24.8017	3.15813e-103
CD4	-0.273756	5.35669	-22.524	9.07715e-97	1.28279e-94	209.883	protein_coding		EXOSC2	-0.301652	6.28992	-16.4254	8.49173e-56	1.16948e-53	116.05	protein_coding		CHSY3	0.56254	4.83282	18.7807	1.03775e-70	1.42919e-68	150.168	protein_coding		ZAP70	0.336136	5.41424	13.1346	2.40487e-37	3.31198e-35	73.9232	protein_coding		GPR183	-1.16045	6.37216	-22.1247	1.54924e-85	2.17517e-83	184.228	protein_coding		QKI	-0.705917	5.62053	-24.7906	3.71538e-103
CCL18	-1.61715	8.20878	-22.4784	1.95101e-96	2.73927e-94	209.121	protein_coding		CHML	-0.310501	4.50814	-16.3954	1.28875e-55	1.76364e-53	115.636	protein_coding		NRP2	0.380531	5.13428	18.7698	1.22363e-70	1.67452e-68	150.004	protein_coding		GZMK	0.786875	5.87574	13.0366	7.6431e-37	1.04594e-34	72.778	protein_coding		PPP1R18	-0.956482	7.8114	-22.0277	5.97452e-85	8.33426e-83	182.883	protein_coding		TIMP3	-1.411	8.13775	-24.7137	1.13957e-102
DOK2	-0.460549	6.10183	-22.4729	2.13993e-96	2.966e-94	209.029	protein_coding		IGLC1	0.888673	7.89404	16.3942	1.3101e-55	1.78157e-53	115.62	IG_C_gene		ADAM12	0.764265	5.56036	18.6927	3.93966e-70	5.32395e-68	148.841	protein_coding		KLRC3	0.306562	3.41747	13.0227	8.99677e-37	1.21974e-34	72.6165	protein_coding		FLI1	-0.525724	4.76787	-21.9843	1.09222e-84	1.51385e-82	182.282	protein_coding		CD14	-1.33481	8.06201	-24.7089	1.2224e-102
COL6A2	-0.953663	7.90492	-22.4648	2.45192e-96	3.37677e-94	208.893	protein_coding		PRC1	-0.674247	8.88679	-16.3846	1.49902e-55	2.02574e-53	115.486	protein_coding		RHOJ	0.449824	5.05299	18.6876	4.2599e-70	5.72096e-68	148.763	protein_coding		C1QB	0.970002	7.9458	13.0224	9.02589e-37	1.21974e-34	72.6133	protein_coding		DIAPH3	0.583727	5.59562	21.9776	1.19885e-84	1.65105e-82	182.189	protein_coding		PLN	-1.97326	5.59775	-24.6133	4.91629e-102
GYPC	-0.631197	7.25295	-22.4601	2.65169e-96	3.62879e-94	208.815	protein_coding		MOB3A	0.325915	6.73046	16.3839	1.5132e-55	2.0322e-53	115.477	protein_coding		COL4A1	0.901919	9.92354	18.6776	4.95444e-70	6.61265e-68	148.613	protein_coding		MTA2	0.509378	5.31806	12.9676	1.71565e-36	2.30409e-34	71.9772	protein_coding		BUB1B	0.915199	8.39094	21.9752	1.23965e-84	1.69644e-82	182.156	protein_coding		NOX4	-0.86915	4.18595	-24.597	6.23494e-102
GLT8D2	-1.05678	6.71865	-22.424	4.85411e-96	6.60098e-94	208.213	protein_coding		RBM15	-0.255715	6.89589	-16.3778	1.64633e-55	2.19735e-53	115.393	protein_coding		IGFBP5	0.643336	6.37611	18.6657	5.93356e-70	7.87089e-68	148.434	protein_coding		GCH1	0.457954	9.01019	12.9538	2.01774e-36	2.69307e-34	71.8166	protein_coding		CLEC10A	-0.796866	5.48672	-21.9549	1.64211e-84	2.23306e-82	181.876	protein_coding		PDGFC	-1.41637	6.74895	-24.5859	7.32851e-102
HLA-E	-0.483545	10.6518	-22.4194	5.24488e-96	7.0878e-94	208.136	protein_coding		ORC1	-0.613673	5.47773	-16.3547	2.27151e-55	2.97665e-53	115.073	protein_coding		FLNA	0.987968	8.61647	18.5748	2.34476e-69	3.07263e-67	147.067	protein_coding		XRN1	0.34554	6.04775	12.9208	2.96649e-36	3.93505e-34	71.4349	protein_coding		PVRIG	-0.665552	6.00998	-21.8877	4.17638e-84	5.64385e-82	180.946	protein_coding		CALHM2	-0.73383	6.42841	-24.4778	3.53377e-101
IFFO1	-0.500719	6.77158	-22.4133	5.80978e-96	7.80243e-94	208.034	protein_coding		SELPLG	0.383946	6.56351	16.319	3.72369e-55	4.85022e-53	114.582	protein_coding		TWIST1	1.13591	5.5914	18.5707	2.49473e-69	3.24946e-67	147.006	protein_coding		NASP	0.333641	7.81355	12.9118	3.29569e-36	4.34508e-34	71.3307	protein_coding		SASS6	0.620422	5.50452	21.8695	5.37959e-84	7.22469e-82	180.694	protein_coding		CRISPLD2	-0.654875	6.73383	-24.4495	5.33021e-101
GNG2	-0.313134	5.25009	-22.3431	1.87915e-95	2.50809e-93	206.864	protein_coding		MAGOHB	-0.372093	5.52357	-16.3154	3.91727e-55	5.07181e-53	114.532	protein_coding		DCN	0.783765	7.18888	18.5585	2.99866e-69	3.88246e-67	146.823	protein_coding		GPR153	-0.422801	7.79548	-12.9062	3.51838e-36	4.61057e-34	71.2659	protein_coding		PLD3	-0.708421	8.17887	-21.8447	7.58497e-84	1.01236e-81	180.352	protein_coding		CD93	-0.970184	7.6281	-24.4492	5.35572e-101
CLIC2	-0.869542	5.46594	-22.2771	5.66322e-95	7.51228e-93	205.765	protein_coding		TRAIP	-0.370144	5.65645	-16.3133	4.03054e-55	5.1874e-53	114.504	protein_coding		COMP	1.47986	5.92824	18.5512	3.3459e-69	4.30625e-67	146.714	protein_coding		CYBB	0.355782	5.14908	12.8885	4.32252e-36	5.63022e-34	71.0621	protein_coding		HLA-DMA	-1.45568	8.1762	-21.8441	7.653e-84	1.01517e-81	180.343	protein_coding		TCEAL7	-1.22328	4.46448	-24.4439	5.78382e-101
IKZF1	-0.232825	4.66465	-22.2497	8.94151e-95	1.17886e-92	205.31	protein_coding		FANCD2	-0.307282	5.01914	-16.2669	7.66789e-55	9.81037e-53	113.865	protein_coding		GEM	1.08025	8.4836	18.5298	4.61931e-69	5.90998e-67	146.393	protein_coding		ATP9A	-0.616313	7.98425	-12.8591	6.08558e-36	7.87919e-34	70.7234	protein_coding		DEPDC1	1.00078	6.13485	21.8325	8.98508e-84	1.18461e-81	180.183	protein_coding		TSPAN4	-0.810586	6.70772	-24.4415	5.9881e-101
TUBB6	-1.05801	8.12816	-22.2371	1.10395e-94	1.44664e-92	205.1	protein_coding		FLVCR1	-0.70726	7.8724	-16.2649	7.88195e-55	1.00249e-52	113.838	protein_coding		MXRA5	1.21542	9.15877	18.5081	6.401e-69	8.14132e-67	146.068	protein_coding		SLC15A3	0.523265	7.01072	12.851	6.68844e-36	8.60818e-34	70.6298	protein_coding		IL7R	-1.18137	7.30515	-21.8122	1.1911e-83	1.56084e-81	179.902	protein_coding		NXN	-1.38091	8.0146	-24.4314	6.93157e-101
FCGR3B	-1.13303	6.69642	-22.1527	4.49908e-94	5.86018e-92	203.7	protein_coding		SPATA5L1	-0.429297	6.25874	-16.2452	1.03521e-54	1.30897e-52	113.567	protein_coding		PRICKLE1	0.540915	4.74465	18.4303	2.06289e-68	2.60841e-66	144.905	protein_coding		PMEPA1	-0.831287	8.95725	-12.8401	7.59053e-36	9.71138e-34	70.5045	protein_coding		SLAMF1	-0.334316	4.89761	-21.808	1.26234e-83	1.64423e-81	179.844	protein_coding		COL18A1	-1.0521	7.28833	-24.4	1.09534e-100
CD3D	-0.747085	7.67744	-22.146	5.03221e-94	6.51536e-92	203.588	protein_coding		ORC6	-0.572844	8.20553	-16.2361	1.17409e-54	1.47594e-52	113.442	protein_coding		NID2	0.942352	7.65824	18.4034	3.08843e-68	3.88245e-66	144.503	protein_coding		STX11	0.295608	4.443	12.8173	9.88963e-36	1.25049e-33	70.2425	protein_coding		CCR7	-1.02692	5.80955	-21.7986	1.43769e-83	1.86142e-81	179.714	protein_coding		ITGA5	-1.18469	7.68705	-24.391	1.24833e-100
CLEC7A	-0.458417	4.59489	-22.13	6.57042e-94	8.45628e-92	203.322	protein_coding		BUB1	-0.335784	5.07941	-16.2354	1.18567e-54	1.48188e-52	113.433	protein_coding		OLFML1	0.784364	5.90948	18.401	3.20507e-68	4.00578e-66	144.466	protein_coding		JAKMIP1	0.229227	4.61437	12.8153	1.01228e-35	1.27128e-33	70.2195	protein_coding		BRIP1	0.883317	5.82793	21.7487	2.87112e-83	3.67334e-81	179.025	protein_coding		FBLN5	-1.07199	6.67918	-24.3657	1.80228e-100
GIMAP7	-0.958693	5.65358	-22.1278	6.81218e-94	8.71556e-92	203.286	protein_coding		RMI1	-0.577673	7.88293	-16.2265	1.34038e-54	1.66561e-52	113.311	protein_coding		ITGAV	0.619432	10.1032	18.3985	3.32619e-68	4.13327e-66	144.43	protein_coding		KIR2DL4	0.183588	4.86112	12.8149	1.01717e-35	1.27128e-33	70.2147	protein_coding		PTAFR	-0.564758	6.64686	-21.7473	2.92949e-83	3.72597e-81	179.005	protein_coding		OSMR	-0.940896	5.50178	-24.3388	2.66496e-100
PIK3CG	-0.419027	4.34452	-22.1068	9.66965e-94	1.22987e-91	202.937	protein_coding		SPAG5	-0.551713	7.52493	-16.217	1.52861e-54	1.87793e-52	113.18	protein_coding		COL18A1	0.800255	7.30812	18.3853	4.05228e-68	5.00676e-66	144.233	protein_coding		NOS2	0.659652	6.16934	12.8138	1.02963e-35	1.27946e-33	70.2026	protein_coding		SERPINF1	-1.51434	8.68296	-21.743	3.10753e-83	3.92929e-81	178.947	protein_coding		WWTR1	-0.952518	6.5393	-24.2898	5.43089e-100
CLMP	-0.975379	5.75544	-22.1032	1.02635e-93	1.29776e-91	202.878	protein_coding		A2M	0.459385	7.51736	16.2164	1.54184e-54	1.88348e-52	113.172	protein_coding		FKBP7	0.489179	5.15968	18.3826	4.21882e-68	5.18292e-66	144.193	protein_coding		LCP2	0.402096	5.09574	12.7881	1.38736e-35	1.71414e-33	69.9073	protein_coding		STAT4	-0.688801	5.67162	-21.7332	3.55991e-83	4.47514e-81	178.811	protein_coding		PECAM1	-0.786761	6.91187	-24.2765	6.58908e-100
IL18BP	-0.348903	6.25979	-22.0823	1.45291e-93	1.82645e-91	202.532	protein_coding		NCKAP1L	0.497557	6.0426	16.214	1.5938e-54	1.93602e-52	113.139	protein_coding		SSPN	0.642603	5.37316	18.3618	5.76898e-68	7.04728e-66	143.882	protein_coding		MOV10	0.325546	6.71545	12.6873	4.43933e-35	5.45381e-33	68.7557	protein_coding		TIMP2	-1.19042	8.65294	-21.6495	1.13371e-82	1.41694e-80	177.657	protein_coding		JAM2	-0.982037	5.07907	-24.2748	6.74938e-100
BTK	-0.504303	5.83434	-22.0669	1.87721e-93	2.34619e-91	202.276	protein_coding		KIF20B	-0.457313	7.43522	-16.2094	1.69686e-54	2.0497e-52	113.077	protein_coding		FXYD6	0.910837	7.18	18.3562	6.26677e-68	7.61237e-66	143.8	protein_coding		GZMB	1.12613	7.32773	12.6737	5.195e-35	6.34611e-33	68.6001	protein_coding		C1orf54	-0.82655	7.66333	-21.6256	1.57782e-82	1.96067e-80	177.328	protein_coding		MMP2	-0.519199	6.0169	-24.2462	1.02191e-99
SAMSN1	-0.729377	5.13915	-22.0591	2.13518e-93	2.65327e-91	202.148	protein_coding		RAD51	-0.389508	5.78638	-16.2081	1.72953e-54	2.07755e-52	113.058	protein_coding		CNN1	1.44361	7.5949	18.3156	1.15227e-67	1.39187e-65	143.194	protein_coding		ICAM1	0.503854	6.93023	12.6716	5.3189e-35	6.46097e-33	68.5767	protein_coding		NUF2	1.24544	7.16923	21.619	1.73064e-82	2.13828e-80	177.236	protein_coding		ACTA2	-0.765016	7.5758	-24.2383	1.14727e-99
SELL	-1.06409	6.0298	-22.0438	2.75308e-93	3.40155e-91	201.895	protein_coding		CD2	0.854169	6.95335	16.2071	1.75346e-54	2.09466e-52	113.044	protein_coding		MYLK	0.582596	6.05403	18.3121	1.21267e-67	1.45668e-65	143.143	protein_coding		SUCNR1	0.466764	5.18391	12.6667	5.62603e-35	6.79586e-33	68.5211	protein_coding		EHD2	-0.575206	7.16152	-21.6121	1.90191e-82	2.33654e-80	177.142	protein_coding		LTBP2	-0.92472	7.08509	-24.226	1.37102e-99
GNB4	-0.581049	6.0037	-22.0306	3.42608e-93	4.20901e-91	201.677	protein_coding		DCLRE1A	-0.441006	6.60954	-16.2053	1.79619e-54	2.13391e-52	113.02	protein_coding		MN1	0.832187	4.83844	18.2749	2.11571e-67	2.51351e-65	142.59	protein_coding		CD86	0.469285	5.46508	12.664	5.80246e-35	6.97004e-33	68.4906	protein_coding		RAD51AP1	1.06929	7.72812	21.5998	2.25545e-82	2.75522e-80	176.972	protein_coding		FXYD6	-1.20905	7.15057	-24.2058	1.83905e-99
GZMK	-1.0169	5.87574	-21.9653	1.01224e-92	1.22959e-90	200.597	protein_coding		PPAT	-0.579308	7.49601	-16.1835	2.42814e-54	2.86892e-52	112.721	protein_coding		C14orf132	0.559706	5.47267	18.264	2.48876e-67	2.94055e-65	142.428	protein_coding		HLA-F	0.482688	9.6667	12.6592	6.1364e-35	7.33045e-33	68.4352	protein_coding		C1S	-1.59911	8.4329	-21.5761	3.13285e-82	3.80553e-80	176.645	protein_coding		EFS	-0.610748	5.60542	-24.1844	2.50647e-99
CXCR4	-1.18178	8.35611	-21.945	1.41674e-92	1.71133e-90	200.263	protein_coding		TRIP13	-0.705033	8.18696	-16.1615	3.2879e-54	3.86364e-52	112.42	protein_coding		MRGPRF	1.06979	6.19443	18.2145	5.21288e-67	6.1257e-65	141.693	protein_coding		CD74	0.591545	8.15482	12.6478	6.98998e-35	8.30425e-33	68.3062	protein_coding		KIF18A	0.983236	5.91865	21.5746	3.19879e-82	3.86392e-80	176.624	protein_coding		MYL9	-1.02234	7.14668	-24.1763	2.81932e-99
FGR	-0.648972	6.08549	-21.9256	1.95612e-92	2.34974e-90	199.941	protein_coding		PARVG	0.307024	5.9858	16.1597	3.37091e-54	3.93978e-52	112.395	protein_coding		AKAP12	0.901038	5.3521	18.21	5.57071e-67	6.51081e-65	141.627	protein_coding		SLC31A2	0.537332	6.78132	12.6382	7.80711e-35	9.20009e-33	68.1968	protein_coding		SELL	-1.35815	5.84213	-21.5645	3.67755e-82	4.41756e-80	176.485	protein_coding		NUAK1	-1.13293	7.20704	-24.1745	2.89307e-99
CLIP4	-0.559264	4.79215	-21.9095	2.5531e-92	3.0499e-90	199.676	protein_coding		AEBP2	-0.325896	5.82085	-16.149	3.90228e-54	4.53629e-52	112.25	protein_coding		GLIS2	0.817471	6.64309	18.2021	6.27313e-67	7.29234e-65	141.509	protein_coding		BAK1	0.359121	7.16782	12.6379	7.82914e-35	9.20009e-33	68.194	protein_coding		CKAP2L	0.766007	7.08796	21.5084	7.98078e-82	9.53373e-80	175.713	protein_coding		ADAMTS2	-0.828198	6.45356	-24.1593	3.60844e-99
EFEMP2	-0.850528	7.53011	-21.8609	5.70301e-92	6.77531e-90	198.875	protein_coding		RASSF5	0.583946	6.69505	16.119	5.9036e-54	6.82608e-52	111.839	protein_coding		JAM3	0.478688	5.46047	18.1755	9.31514e-67	1.07707e-64	141.116	protein_coding		GPR18	0.406052	4.00544	12.6062	1.12703e-34	1.31722e-32	67.8333	protein_coding		MND1	1.19504	6.17937	21.5059	8.26018e-82	9.81328e-80	175.679	protein_coding		GEM	-1.41845	8.45795	-24.1528	3.96813e-99
DDR2	-0.890803	6.74939	-21.8363	8.56033e-92	1.01143e-89	198.47	protein_coding		ZNF770	-0.380981	5.8878	-16.1083	6.83715e-54	7.86345e-52	111.693	protein_coding		ADAMTS12	0.519947	6.22646	18.159	1.19123e-66	1.37004e-64	140.871	protein_coding		SCO2	0.410867	8.46286	12.602	1.1819e-34	1.37392e-32	67.7862	protein_coding		CD247	-0.712256	5.89439	-21.4924	9.95915e-82	1.1767e-79	175.492	protein_coding		GREM1	-2.43686	8.45722	-24.1231	6.10427e-99
SFRP2	-2.23177	7.53645	-21.8341	8.87522e-92	1.04294e-89	198.434	protein_coding		HSPE1	-0.441656	10.7585	-16.1068	6.98218e-54	7.98776e-52	111.672	protein_coding		ACTA2	0.577715	7.59337	18.1561	1.24285e-66	1.42185e-64	140.829	protein_coding		C1QA	0.844243	8.19092	12.5936	1.3009e-34	1.50417e-32	67.6912	protein_coding		EVI2A	-1.27099	6.04649	-21.4749	1.26834e-81	1.49044e-79	175.252	protein_coding		FEZ1	-0.552511	5.65772	-24.1066	7.75234e-99
TAGAP	-0.423013	4.69612	-21.8337	8.94054e-92	1.04493e-89	198.427	protein_coding		NEIL3	-0.574455	5.59591	-16.09	8.79229e-54	1.00056e-51	111.443	protein_coding		PABPC4L	0.386762	3.98157	18.1534	1.29512e-66	1.47385e-64	140.788	protein_coding		TRIM21	0.321453	7.63883	12.5872	1.40072e-34	1.61098e-32	67.618	protein_coding		MXRA8	-0.938283	7.71033	-21.4638	1.47793e-81	1.72735e-79	175.099	protein_coding		C3orf80	-1.08778	4.12699	-24.0939	9.31566e-99
NCF1	-0.612863	5.80712	-21.7988	1.59025e-91	1.84862e-89	197.853	protein_coding		TRIM59	-0.676699	6.37732	-16.0088	2.67468e-53	3.02785e-51	110.339	protein_coding		MYL9	0.782828	7.16195	18.1177	2.20277e-66	2.49363e-64	140.26	protein_coding		GINS3	0.418044	6.23466	12.5835	1.46057e-34	1.67092e-32	67.5766	protein_coding		LY9	-0.389198	4.74016	-21.4557	1.65134e-81	1.91964e-79	174.989	protein_coding		COL1A1	-1.15402	9.29484	-24.0916	9.63691e-99
IL2RB	-0.668989	7.31487	-21.7729	2.44029e-91	2.8216e-89	197.427	protein_coding		LRRC58	-0.418904	6.37801	-15.9953	3.217e-53	3.62281e-51	110.155	protein_coding		SNAI2	1.1243	6.93073	18.0992	2.89944e-66	3.24827e-64	139.986	protein_coding		LTBP1	-0.563881	7.72594	-12.5629	1.84715e-34	2.10206e-32	67.3442	protein_coding		NKG7	-0.918639	5.79422	-21.4488	1.81706e-81	2.10098e-79	174.893	protein_coding		LY96	-1.51357	6.25727	-24.0848	1.06294e-98
TLR1	-0.83557	4.4781	-21.7577	3.13419e-91	3.60465e-89	197.177	protein_coding		SKA3	-0.594774	7.41936	-15.9863	3.63996e-53	4.07789e-51	110.033	protein_coding		KCNE4	0.58485	4.93575	18.0971	2.98717e-66	3.3293e-64	139.957	protein_coding		TNFRSF18	0.280066	5.19316	12.5502	2.13726e-34	2.41947e-32	67.1997	protein_coding		IGKC	-1.03652	6.95221	-21.4408	2.02995e-81	2.33466e-79	174.783	IG_C_gene		C11orf96	-1.45288	9.07431	-24.0385	2.08183e-98
AEBP1	-1.20926	8.53293	-21.6962	8.63619e-91	9.87998e-89	196.167	protein_coding		LILRB1	0.485384	6.69484	15.9725	4.39449e-53	4.89782e-51	109.846	protein_coding		NREP	0.447634	6.00549	18.0837	3.64738e-66	4.04429e-64	139.758	protein_coding		HPSE	0.583009	5.72179	12.4471	6.8986e-34	7.76883e-32	66.0397	protein_coding		THEMIS2	-0.921141	6.02117	-21.354	6.72531e-81	7.69389e-79	173.59	protein_coding		BASP1	-0.712614	6.56791	-24.0369	2.13005e-98
RGS2	-1.26336	8.86567	-21.683	1.07466e-90	1.22297e-88	195.949	protein_coding		GNG7	0.245807	5.51927	15.9629	5.0101e-53	5.5553e-51	109.716	protein_coding		ITGBL1	0.808219	4.60712	18.0725	4.30601e-66	4.75023e-64	139.593	protein_coding		HLA-DPB1	0.563908	7.14	12.4298	8.38929e-34	9.39862e-32	65.8461	protein_coding		WAS	-0.45934	6.69676	-21.3361	8.5975e-81	9.78395e-79	173.345	protein_coding		AMOTL1	-0.443503	5.50278	-24.025	2.52906e-98
PPP1R16B	-0.44183	5.16774	-21.6515	1.80354e-90	2.04168e-88	195.434	protein_coding		CSF1R	0.718496	7.40051	15.9608	5.15947e-53	5.69174e-51	109.687	protein_coding		ARMCX2	1.0173	6.86071	18.0577	5.36588e-66	5.88939e-64	139.374	protein_coding		TBC1D10C	0.350632	6.23818	12.4216	9.20747e-34	1.02621e-31	65.754	protein_coding		STIL	0.917777	7.68751	21.3309	9.24807e-81	1.04692e-78	173.272	protein_coding		NRP1	-0.552869	4.96971	-24.0217	2.65544e-98
PRKCB	-0.34896	4.75876	-21.639	2.21672e-90	2.49635e-88	195.228	protein_coding		SLCO2A1	0.708438	6.8877	15.9505	5.93953e-53	6.51901e-51	109.547	protein_coding		PDE1A	0.376009	3.86263	18.0426	6.71078e-66	7.32831e-64	139.152	protein_coding		SFMBT2	0.236707	4.99792	12.4062	1.09556e-33	1.21478e-31	65.5819	protein_coding		MS4A7	-1.1281	5.94593	-21.3239	1.01755e-80	1.14592e-78	173.177	protein_coding		LAMA4	-0.452312	5.57655	-23.9981	3.73333e-98
TLR8	-0.638664	4.68593	-21.6226	2.90163e-90	3.25073e-88	194.96	protein_coding		FUCA1	0.32436	6.83767	15.9482	6.12419e-53	6.68774e-51	109.516	protein_coding		CCDC80	0.947128	5.98966	18.0325	7.7903e-66	8.46441e-64	139.004	protein_coding		SLC25A22	0.280059	6.77757	12.3846	1.39837e-33	1.54263e-31	65.3403	protein_coding		COLEC12	-1.27552	5.67343	-21.3186	1.09462e-80	1.22632e-78	173.105	protein_coding		RFTN1	-0.54942	5.98169	-23.9973	3.78149e-98
HLA-DRB6	-0.393008	5.69968	-21.5709	6.791e-90	7.56882e-88	194.113	transcribed_unprocessed_pseudogene		EVI2B	1.06339	6.92851	15.9458	6.32795e-53	6.87552e-51	109.484	protein_coding		ECM2	0.560328	5.41579	18.0036	1.19555e-65	1.29251e-63	138.578	protein_coding		HLA-DOA	0.214881	5.91306	12.3755	1.55018e-33	1.70143e-31	65.2383	protein_coding		BOC	-0.510883	6.08653	-21.3163	1.13066e-80	1.26017e-78	173.072	protein_coding		NRP2	-0.492972	5.12925	-23.9798	4.86861e-98
MGAT1	-0.397369	8.30058	-21.5595	8.18811e-90	9.07915e-88	193.926	protein_coding		CCNA2	-0.703523	7.73457	-15.9444	6.45524e-53	6.97876e-51	109.464	protein_coding		IL1R1	0.584446	5.99308	17.9901	1.45997e-65	1.57052e-63	138.379	protein_coding		XCL1	0.266776	4.57635	12.3631	1.78202e-33	1.946e-31	65.1003	protein_coding		ITM2A	-1.21299	6.42723	-21.3128	1.18586e-80	1.31491e-78	173.025	protein_coding		FLNA	-1.28733	8.59895	-23.9694	5.66331e-98
IL7R	-0.897089	7.45001	-21.5532	9.08259e-90	1.00196e-87	193.823	protein_coding		FOXM1	-0.719711	7.79694	-15.9434	6.54558e-53	7.04122e-51	109.45	protein_coding		SERPINF1	1.17028	8.98181	17.987	1.5278e-65	1.63535e-63	138.334	protein_coding		PARP3	0.332307	6.74699	12.3417	2.26886e-33	2.46519e-31	64.8613	protein_coding		SLC15A3	-0.799332	6.80814	-21.3076	1.2749e-80	1.40643e-78	172.953	protein_coding		HOPX	-0.596625	5.08038	-23.9651	6.0298e-98
P2RY13	-0.786117	5.01732	-21.5202	1.55961e-89	1.71177e-87	193.284	protein_coding		INTS7	-0.359746	5.6063	-15.9429	6.58807e-53	7.05184e-51	109.444	protein_coding		PEG3	0.514773	4.0302	17.9517	2.57603e-65	2.74379e-63	137.814	protein_coding		CTSW	0.318106	6.07599	12.3354	2.43663e-33	2.63424e-31	64.7907	protein_coding		KIF23	0.778637	5.45714	21.3034	1.34998e-80	1.48169e-78	172.896	protein_coding		VCAM1	-1.3844	7.13201	-23.9518	7.30707e-98
ITM2A	-0.936718	6.58604	-21.4826	2.89039e-89	3.15636e-87	192.67	protein_coding		UNG	-0.492336	8.40656	-15.93	7.85318e-53	8.3646e-51	109.269	protein_coding		CNRIP1	0.814949	6.56538	17.9502	2.63052e-65	2.78809e-63	137.794	protein_coding		DYNC1LI2	-0.257322	7.96566	-12.3297	2.59576e-33	2.79232e-31	64.7281	protein_coding		APOBEC3G	-0.661986	6.60054	-21.2957	1.50047e-80	1.63854e-78	172.79	protein_coding		CMTM3	-0.607931	6.40426	-23.9438	8.20823e-98
RHOH	-0.594004	5.33503	-21.4771	3.16416e-89	3.43796e-87	192.579	protein_coding		CDC7	-0.771687	6.72753	-15.9127	9.94995e-53	1.0546e-50	109.035	protein_coding		NEXN	1.20729	5.94498	17.9065	5.01832e-65	5.29298e-63	137.151	protein_coding		IGFLR1	0.33093	6.67233	12.322	2.83055e-33	3.0298e-31	64.6423	protein_coding		EFEMP2	-0.970741	7.33793	-21.2921	1.57732e-80	1.71381e-78	172.741	protein_coding		CLIP4	-0.681481	4.70534	-23.9142	1.25942e-97
SPARCL1	-1.21276	9.23747	-21.3629	2.04829e-88	2.2144e-86	190.719	protein_coding		KRR1	-0.313241	5.61867	-15.9036	1.12571e-52	1.18732e-50	108.912	protein_coding		PHLDB2	0.362857	4.19733	17.8917	6.24148e-65	6.55113e-63	136.934	protein_coding		RHEBL1	0.223776	5.04882	12.3159	3.0314e-33	3.22881e-31	64.5745	protein_coding		CCT6A	0.566649	10.0857	21.2846	1.74893e-80	1.89077e-78	172.638	protein_coding		MXRA7	-0.802224	7.12683	-23.9118	1.30297e-97
GAS7	-0.48069	5.96832	-21.3551	2.32746e-88	2.5037e-86	190.591	protein_coding		FOLR2	0.374813	6.32284	15.8984	1.20756e-52	1.26747e-50	108.842	protein_coding		OSMR	0.690421	5.5387	17.8765	7.81232e-65	8.16029e-63	136.711	protein_coding		CD9	-0.316988	7.75627	-12.299	3.6679e-33	3.88761e-31	64.3859	protein_coding		APOL3	-0.848599	6.45577	-21.2672	2.22196e-80	2.39021e-78	172.399	protein_coding		ITGB2	-0.816214	6.51848	-23.9074	1.39027e-97
C5AR1	-1.03675	6.68008	-21.3521	2.44583e-88	2.61801e-86	190.542	protein_coding		TIPIN	-0.72658	6.49482	-15.8979	1.21634e-52	1.27052e-50	108.835	protein_coding		GFPT2	0.872436	5.69065	17.8702	8.57032e-65	8.90901e-63	136.619	protein_coding		GBP1P1	0.190333	4.84816	12.2785	4.61643e-33	4.86909e-31	64.1582	transcribed_unprocessed_pseudogene		NCAPG2	0.829463	7.6736	21.2636	2.33596e-80	2.5004e-78	172.349	protein_coding		TIMP1	-0.92083	11.4927	-23.9043	1.45375e-97
PSAP	-0.452197	11.0496	-21.3506	2.50546e-88	2.66863e-86	190.518	protein_coding		MELK	-0.61132	8.69263	-15.8844	1.46227e-52	1.51552e-50	108.652	protein_coding		HSD17B6	0.984956	5.13354	17.7742	3.51403e-64	3.60097e-62	135.216	protein_coding		RTP4	0.647769	6.89326	12.2723	4.94541e-33	5.18716e-31	64.0901	protein_coding		BRCA2	0.932803	5.69788	21.2587	2.49757e-80	2.66022e-78	172.283	protein_coding		COL12A1	-1.14387	6.93198	-23.8938	1.69146e-97
GPR171	-0.916267	5.16762	-21.3323	3.37813e-88	3.58048e-86	190.22	protein_coding		DLGAP5	-0.828797	7.74506	-15.8842	1.46501e-52	1.51552e-50	108.65	protein_coding		SGCE	1.02327	6.05142	17.7675	3.87818e-64	3.95538e-62	135.118	protein_coding		CHAC2	0.706186	6.66256	12.2719	4.96597e-33	5.18716e-31	64.086	protein_coding		PLK4	0.69285	5.30794	21.2538	2.6722e-80	2.83227e-78	172.215	protein_coding		MXRA5	-1.62624	9.11179	-23.8823	1.99801e-97
FBLN5	-0.837709	6.78862	-21.3207	4.0864e-88	4.31006e-86	190.031	protein_coding		C17orf75	-0.62937	5.98141	-15.8839	1.47192e-52	1.51552e-50	108.646	protein_coding		GPRASP1	0.766611	5.13458	17.7595	4.358e-64	4.42388e-62	135.002	protein_coding		SLC9A7	0.394851	4.88655	12.2626	5.51165e-33	5.72947e-31	63.9828	protein_coding		MCM10	0.782521	6.11888	21.2296	3.72778e-80	3.91272e-78	171.884	protein_coding		TNFAIP6	-1.68824	6.33525	-23.8722	2.31203e-97
DOK3	-0.396865	5.37665	-21.3201	4.12704e-88	4.33179e-86	190.021	protein_coding		DDX55	-0.460297	6.82143	-15.8829	1.49262e-52	1.52955e-50	108.632	protein_coding		TRPC1	0.538222	4.2189	17.7295	6.77004e-64	6.84027e-62	134.564	protein_coding		NDC80	0.654375	7.07595	12.2499	6.35722e-33	6.57684e-31	63.8415	protein_coding		ASPM	0.726509	5.77337	21.2193	4.2953e-80	4.48662e-78	171.743	protein_coding		C1orf54	-0.836916	7.69626	-23.8579	2.84465e-97
IL1R1	-0.595514	5.99308	-21.3126	4.66251e-88	4.87019e-86	189.899	protein_coding		YEATS4	-0.65065	6.72682	-15.8813	1.52452e-52	1.54757e-50	108.611	protein_coding		SLC24A3	0.885819	6.71308	17.716	8.25271e-64	8.29954e-62	134.367	protein_coding		PPP1R16B	0.326737	5.16774	12.2492	6.40545e-33	6.59517e-31	63.834	protein_coding		GPR171	-1.05569	4.96423	-21.1971	5.83677e-80	6.06743e-78	171.437	protein_coding		BCAT1	-1.1219	5.76507	-23.8086	5.80358e-97
CCR5	-0.625736	7.18843	-21.259	1.1177e-87	1.16187e-85	189.028	protein_coding		RBM12	-0.35297	8.02807	-15.8759	1.64089e-52	1.65791e-50	108.538	protein_coding		WWTR1	0.710399	6.56795	17.7031	9.96536e-64	9.97551e-62	134.18	protein_coding		PSMA4	0.292916	10.2973	12.2421	6.93748e-33	7.10911e-31	63.7551	protein_coding		MOB3A	-0.442607	6.70919	-21.164	9.19896e-80	9.51674e-78	170.984	protein_coding		JAM3	-0.625183	5.45111	-23.7673	1.05499e-96
TRAF3IP3	-0.338902	4.53933	-21.2343	1.66989e-87	1.72757e-85	188.628	protein_coding		CDK1	-0.599267	7.76105	-15.8683	1.82106e-52	1.8314e-50	108.434	protein_coding		COL8A2	0.616735	5.9698	17.7021	1.01214e-63	1.0085e-61	134.164	protein_coding		STAT4	0.402253	5.74089	12.2347	7.53488e-33	7.66267e-31	63.6733	protein_coding		DBF4	0.866767	8.33757	21.1595	9.78479e-80	1.00746e-77	170.923	protein_coding		IGFBP6	-1.04064	6.85526	-23.7471	1.41302e-96
CD300A	-0.42355	5.52803	-21.2301	1.79033e-87	1.84335e-85	188.559	protein_coding		SLAMF7	0.751435	5.80987	15.8272	3.18277e-52	3.18601e-50	107.88	protein_coding		CD93	0.697539	7.67711	17.6805	1.38695e-63	1.37562e-61	133.851	protein_coding		CENPM	0.461688	7.44492	12.2345	7.54855e-33	7.66267e-31	63.6715	protein_coding		E2F7	0.661208	5.61444	21.1383	1.30904e-79	1.34142e-77	170.633	protein_coding		DNM3OS	-0.728719	4.551	-23.7392	1.58409e-96
RARRES2	-0.984935	8.60673	-21.2267	1.89233e-87	1.93915e-85	188.504	protein_coding		CTSG	0.484029	6.01902	15.7879	5.42645e-52	5.38214e-50	107.351	protein_coding		ZNF677	0.271834	3.68182	17.5891	5.27148e-63	5.18091e-61	132.523	protein_coding		CLEC2D	0.243337	3.76708	12.2293	8.00736e-33	8.09043e-31	63.6131	protein_coding		CRISPLD2	-0.60444	6.69253	-21.1175	1.74305e-79	1.77775e-77	170.347	protein_coding		SSPN	-0.848265	5.35522	-23.699	2.83047e-96
GPR65	-0.750294	5.44694	-21.2161	2.24773e-87	2.29247e-85	188.332	protein_coding		TIMELESS	-0.311355	6.16386	-15.7847	5.663e-52	5.59112e-50	107.308	protein_coding		TNC	0.89896	5.44586	17.5704	6.92303e-63	6.7733e-61	132.252	protein_coding		TK1	0.482914	8.14281	12.2121	9.69869e-33	9.75373e-31	63.4235	protein_coding		IGLL3P	-1.64788	8.88895	-21.1041	2.09607e-79	2.12776e-77	170.164	unprocessed_pseudogene		DKK3	-0.695988	5.74189	-23.6566	5.22645e-96
PLEK	-0.820163	6.87886	-21.1928	3.28411e-87	3.33376e-85	187.954	protein_coding		POLE2	-0.652582	7.10302	-15.7674	7.15533e-52	7.03239e-50	107.076	protein_coding		AMOTL1	0.327601	5.51854	17.5575	8.35093e-63	8.13351e-61	132.066	protein_coding		PVRIG	0.399731	6.03971	12.2077	1.01843e-32	1.01947e-30	63.3751	protein_coding		HEG1	-0.772749	7.54245	-21.0943	2.39827e-79	2.42315e-77	170.029	protein_coding		HLX	-0.719425	6.51797	-23.6378	6.85553e-96
CD69	-1.17515	5.18023	-21.1666	5.0292e-87	5.08138e-85	187.53	protein_coding		CEP55	-0.790393	8.11551	-15.7598	7.93678e-52	7.76512e-50	106.973	protein_coding		TMEM200B	0.637233	5.54907	17.543	1.03115e-62	9.99796e-61	131.856	protein_coding		SNRPD1	0.364524	8.82867	12.2046	1.05396e-32	1.05017e-30	63.3412	protein_coding		VIM	-0.892897	7.45208	-21.0836	2.777e-79	2.79276e-77	169.883	protein_coding		DZIP1	-0.680313	4.60757	-23.5544	2.28459e-95
ANGPTL2	-0.79396	6.71005	-21.1585	5.73936e-87	5.77192e-85	187.398	protein_coding		GZMK	0.918911	5.87574	15.7361	1.0929e-51	1.06445e-49	106.656	protein_coding		SERPINH1	0.63996	9.40902	17.4933	2.12697e-62	2.05309e-60	131.136	protein_coding		CCDC88C	0.269673	5.59215	12.1785	1.41077e-32	1.39926e-30	63.0526	protein_coding		TSPAN4	-0.779372	6.66806	-21.0818	2.84609e-79	2.84899e-77	169.859	protein_coding		FZD1	-0.565016	5.03871	-23.521	3.70018e-95
CCDC80	-0.957809	5.98966	-21.1568	5.89618e-87	5.90219e-85	187.371	protein_coding		NOL10	-0.241544	6.33739	-15.7321	1.15419e-51	1.1191e-49	106.601	protein_coding		MLLT11	0.792962	6.74295	17.4894	2.24799e-62	2.16027e-60	131.081	protein_coding		POLE2	0.524181	7.10302	12.1674	1.59638e-32	1.5714e-30	62.9303	protein_coding		FPR3	-1.06638	6.09303	-21.0633	3.67174e-79	3.65854e-77	169.605	protein_coding		CYS1	-0.845191	4.38182	-23.5057	4.61533e-95
CCL4	-1.02355	7.70042	-21.1456	7.07651e-87	7.05107e-85	187.19	protein_coding		ECT2	-0.511167	6.57404	-15.7316	1.16142e-51	1.12108e-49	106.595	protein_coding		S1PR3	0.514506	6.07085	17.4636	3.27005e-62	3.12854e-60	130.709	protein_coding		CMPK2	0.872831	7.63363	12.1672	1.59888e-32	1.5714e-30	62.9288	protein_coding		MS4A4A	-1.15178	5.98096	-21.0468	4.60231e-79	4.56473e-77	169.38	protein_coding		MRGPRF	-1.41266	6.16428	-23.4959	5.31237e-95
GGT5	-0.574891	6.44855	-21.1275	9.49206e-87	9.41456e-85	186.897	protein_coding		TTC26	-0.344836	4.85061	-15.7252	1.26743e-51	1.21267e-49	106.508	protein_coding		LRRC32	0.647155	7.48557	17.4183	6.30996e-62	5.98395e-60	130.055	protein_coding		RTN4	-0.272364	9.80459	-12.161	1.71379e-32	1.67673e-30	62.8601	protein_coding		PIP4K2A	-0.486967	6.71987	-21.0405	5.01696e-79	4.95327e-77	169.294	protein_coding		HCLS1	-1.13912	6.89091	-23.4924	5.5939e-95
APOBEC3G	-0.530119	6.69941	-21.1235	1.01321e-86	1.00035e-84	186.832	protein_coding		TNFRSF17	1.23758	4.88721	15.7252	1.26752e-51	1.21267e-49	106.508	protein_coding		CTSK	1.02625	9.44042	17.4033	7.84576e-62	7.3757e-60	129.839	protein_coding		ARHGAP9	0.437118	6.11912	12.1504	1.92893e-32	1.87871e-30	62.743	protein_coding		CHEK1	0.756623	6.32199	21.0401	5.04765e-79	4.96092e-77	169.288	protein_coding		THBD	-0.691501	5.80313	-23.4841	6.30615e-95
STAB1	-0.303227	5.74463	-21.0703	2.40521e-86	2.36388e-84	185.971	protein_coding		RCSD1	0.694332	5.87208	15.7181	1.39525e-51	1.32899e-49	106.413	protein_coding		NXN	0.991088	8.0857	17.366	1.34619e-61	1.26006e-59	129.302	protein_coding		EXOSC9	0.288507	7.77033	12.1452	2.04251e-32	1.98041e-30	62.6864	protein_coding		ABI3	-0.473944	6.93666	-21.0096	7.67213e-79	7.50619e-77	168.871	protein_coding		RUNX1T1	-0.544247	4.62984	-23.4258	1.46045e-94
SP110	-0.482031	7.17316	-21.07	2.41696e-86	2.36468e-84	185.966	protein_coding		PINK1	0.419223	7.89238	15.709	1.57817e-51	1.49663e-49	106.291	protein_coding		C1R	0.994829	8.93285	17.351	1.67131e-61	1.55095e-59	129.087	protein_coding		KIF18A	0.575545	5.99002	12.1254	2.54602e-32	2.45759e-30	62.4684	protein_coding		ALOX5AP	-1.33243	7.85059	-20.9655	1.40496e-78	1.36838e-76	168.268	protein_coding		ARHGEF6	-0.827253	6.57646	-23.4137	1.7397e-94
MEF2C	-0.583772	6.03864	-21.0682	2.48845e-86	2.42366e-84	185.937	protein_coding		CCNE2	-0.773944	6.17464	-15.7084	1.58905e-51	1.50037e-49	106.284	protein_coding		ERG	0.303297	4.57452	17.3039	3.29922e-61	3.03556e-59	128.411	protein_coding		MTHFD2	0.448714	7.84383	12.1153	2.84851e-32	2.73735e-30	62.3573	protein_coding		NR3C1	-1.05475	6.24165	-20.9547	1.62808e-78	1.57858e-76	168.122	protein_coding		ARMCX1	-1.35791	6.39876	-23.3872	2.54634e-94
TGFB1	-0.500493	6.30955	-21.0632	2.6968e-86	2.61481e-84	185.857	protein_coding		KIF20A	-0.655244	7.48175	-15.705	1.66453e-51	1.56481e-49	106.238	protein_coding		COL24A1	0.394623	3.4661	17.2666	5.64445e-61	5.17137e-59	127.877	protein_coding		FARP1	-0.516991	6.96344	-12.1056	3.16884e-32	3.03171e-30	62.2518	protein_coding		LY96	-1.535	6.21249	-20.9496	1.74674e-78	1.68607e-76	168.052	protein_coding		RHOJ	-0.582606	5.04711	-23.3791	2.86185e-94
DOCK8	-0.534626	4.94184	-21.0492	3.38693e-86	3.2693e-84	185.63	protein_coding		KLRB1	0.831171	6.2846	15.6862	2.14628e-51	2.00029e-49	105.986	protein_coding		ELK3	0.452168	6.8201	17.2647	5.80379e-61	5.28415e-59	127.849	protein_coding		MAP4K1	0.284998	5.87245	12.0777	4.31725e-32	4.11222e-30	61.9458	protein_coding		MIS18A	0.726346	6.87572	20.9247	2.4561e-78	2.34982e-76	167.712	protein_coding		TMEM47	-1.42034	6.90769	-23.32	6.70904e-94
TRPV2	-0.367552	5.65912	-21.0385	4.02464e-86	3.83351e-84	185.458	protein_coding		NAA25	-0.484609	6.48291	-15.6819	2.27238e-51	2.10873e-49	105.929	protein_coding		ITGA11	0.323735	5.46081	17.2646	5.81642e-61	5.28415e-59	127.847	protein_coding		SKA1	0.526383	4.99382	12.0528	5.68581e-32	5.39204e-30	61.6733	protein_coding		CCDC80	-1.11758	5.7822	-20.9151	2.8042e-78	2.67104e-76	167.58	protein_coding		AKAP12	-1.11561	5.37108	-23.2953	9.57068e-94
SULF1	-1.3687	9.01511	-21.0374	4.09622e-86	3.88458e-84	185.44	protein_coding		CENPK	-0.815117	7.19271	-15.6738	2.53687e-51	2.34411e-49	105.82	protein_coding		FILIP1L	0.584214	6.64595	17.2571	6.47247e-61	5.85556e-59	127.741	protein_coding		SP110	0.35858	7.17316	12.0504	5.84043e-32	5.51449e-30	61.6468	protein_coding		CHEK2	0.636299	7.26572	20.8988	3.50418e-78	3.32313e-76	167.358	protein_coding		GAS7	-0.58925	5.89512	-23.2935	9.82813e-94
PLD3	-0.558034	8.2787	-21.0171	5.69176e-86	5.37411e-84	185.113	protein_coding		CDCA5	-0.576031	7.98204	-15.6705	2.65255e-51	2.44057e-49	105.775	protein_coding		GPX8	0.935473	6.47876	17.2365	8.70685e-61	7.84415e-59	127.446	protein_coding		P2RY10	0.255268	4.29359	12.0465	6.09577e-32	5.73056e-30	61.6044	protein_coding		RFC4	0.716266	8.58792	20.8976	3.55971e-78	3.36105e-76	167.342	protein_coding		PRKD1	-0.623864	4.11498	-23.2641	1.50018e-93
PLXDC2	-0.882905	5.79965	-21.0078	6.6148e-86	6.21849e-84	184.963	protein_coding		CCL22	0.375488	6.23841	15.6669	2.78218e-51	2.549e-49	105.728	protein_coding		NAV1	0.386022	5.72886	17.2039	1.39274e-60	1.24953e-58	126.979	protein_coding		HPS5	0.36621	7.00559	12.0366	6.79712e-32	6.36222e-30	61.4967	protein_coding		KIF15	0.997996	6.83939	20.8914	3.87902e-78	3.64661e-76	167.257	protein_coding		GLIS2	-1.04107	6.643	-23.2625	1.53525e-93
PALLD	-0.656143	7.59652	-20.9896	8.88822e-86	8.31952e-84	184.669	protein_coding		GINS3	-0.501984	6.23466	-15.6635	2.913e-51	2.65759e-49	105.682	protein_coding		RBMS1	0.904967	7.78513	17.1946	1.59166e-60	1.4221e-58	126.846	protein_coding		APOL4	0.188713	5.13666	12.0275	7.51716e-32	7.00586e-30	61.3971	protein_coding		PIK3CD	-0.51007	5.93116	-20.8793	4.57967e-78	4.28665e-76	167.091	protein_coding		LDB2	-0.517206	5.00268	-23.258	1.63834e-93
CTSO	-0.774013	7.17924	-20.9416	1.93338e-85	1.79414e-83	183.894	protein_coding		POLR2D	-0.379496	6.7723	-15.6533	3.34277e-51	3.03686e-49	105.546	protein_coding		LAMB2	0.639183	6.86466	17.1153	4.96333e-60	4.41634e-58	125.716	protein_coding		MCM2	0.444224	8.98742	11.9719	1.38663e-31	1.28677e-29	60.7912	protein_coding		IGLC1	-1.22686	7.8234	-20.8744	4.89486e-78	4.56192e-76	167.025	IG_C_gene		GJA1	-1.38899	8.89059	-23.2449	1.9762e-93
LILRB2	-0.608836	5.18203	-20.9298	2.33823e-85	2.16056e-83	183.705	protein_coding		IGHD	0.523071	5.39685	15.6529	3.35974e-51	3.03951e-49	105.541	IG_C_gene		EFEMP1	0.879475	6.05964	17.1051	5.73931e-60	5.08588e-58	125.571	protein_coding		NUP50	0.267332	6.36231	11.9715	1.39276e-31	1.28693e-29	60.7869	protein_coding		HLA-E	-0.580107	10.5529	-20.8651	5.56092e-78	5.16043e-76	166.898	protein_coding		RARRES2	-1.25968	8.47778	-23.2205	2.80929e-93
CMTM3	-0.465433	6.4601	-20.8926	4.26359e-85	3.92287e-83	183.106	protein_coding		E2F8	-0.751183	7.08548	-15.6488	3.55476e-51	3.20255e-49	105.485	protein_coding		LDB2	0.376302	5.02543	17.0914	6.98311e-60	6.16281e-58	125.376	protein_coding		TNFRSF14	0.320429	7.70179	11.9192	2.47037e-31	2.27295e-29	60.2199	protein_coding		CMSS1	0.726035	8.4716	20.86	5.96126e-78	5.50831e-76	166.829	protein_coding		IFFO1	-0.590026	6.68577	-23.2076	3.37885e-93
CRISPLD2	-0.497352	6.79139	-20.8537	7.99966e-85	7.30503e-83	182.48	protein_coding		PVRIG	0.492915	6.03971	15.6474	3.62213e-51	3.24969e-49	105.466	protein_coding		HOPX	0.421615	5.11611	17.0844	7.721e-60	6.78632e-58	125.276	protein_coding		TIPIN	0.568384	6.49482	11.9107	2.71128e-31	2.48403e-29	60.1278	protein_coding		DDR2	-0.97578	6.53308	-20.842	7.62726e-78	7.01773e-76	166.583	protein_coding		KCNE4	-0.750501	4.9323	-23.206	3.46059e-93
NDN	-0.939179	7.06189	-20.8536	8.00709e-85	7.30503e-83	182.479	protein_coding		AHCTF1	-0.45872	7.15374	-15.6419	3.89786e-51	3.48263e-49	105.393	protein_coding		C11orf96	1.03834	9.15247	17.0667	9.94979e-60	8.70989e-58	125.024	protein_coding		MCM10	0.450636	6.15964	11.8648	4.47493e-31	4.08257e-29	59.6321	protein_coding		FBLN1	-0.840225	6.3601	-20.8307	8.90239e-78	8.15625e-76	166.429	protein_coding		FCGR1B	-1.08202	5.40865	-23.1562	7.08119e-93
PCOLCE	-0.975324	8.21773	-20.8436	9.40383e-85	8.54326e-83	182.318	protein_coding		ADAT2	-0.456259	5.74692	-15.6132	5.73554e-51	5.10345e-49	105.01	protein_coding		SYNDIG1	0.519574	5.15378	17.046	1.33644e-59	1.16519e-57	124.731	protein_coding		KCTD10	-0.251084	8.33838	-11.8429	5.68246e-31	5.16245e-29	59.3957	protein_coding		KIF14	1.0687	6.38998	20.8263	9.45441e-78	8.62545e-76	166.369	protein_coding		LRRC32	-0.8782	7.45319	-23.1153	1.27402e-92
C20orf194	-0.55771	5.89454	-20.8364	1.0575e-84	9.56705e-83	182.202	protein_coding		PAICS	-0.384916	7.80326	-15.609	6.07239e-51	5.36608e-49	104.953	protein_coding		NOTCH3	0.410146	6.30418	17.0373	1.5133e-59	1.31019e-57	124.607	protein_coding		CDC45	0.454244	7.01206	11.8289	6.62093e-31	5.98986e-29	59.2445	protein_coding		MSN	-0.551201	6.87831	-20.8133	1.13012e-77	1.0267e-75	166.192	protein_coding		IL10RA	-0.843462	6.24229	-23.1123	1.33049e-92
FCGR2A	-0.526949	5.20347	-20.8076	1.68189e-84	1.51524e-82	181.739	protein_coding		HAUS3	-0.577928	7.26809	-15.6089	6.08034e-51	5.36608e-49	104.952	protein_coding		ACVR1	0.420727	8.29115	17.0373	1.51488e-59	1.31019e-57	124.606	protein_coding		SDF2L1	0.402684	8.47282	11.827	6.75583e-31	6.08644e-29	59.2246	protein_coding		SPAG5	0.724435	7.54523	20.7979	1.39491e-77	1.26195e-75	165.982	protein_coding		ADAMTS12	-0.645218	6.23654	-23.1059	1.45955e-92
LAYN	-0.288256	4.25576	-20.7768	2.76211e-84	2.47811e-82	181.245	protein_coding		CPSF3	-0.341818	8.68602	-15.597	7.13366e-51	6.27008e-49	104.793	protein_coding		C8orf88	0.592935	4.18514	17.0345	1.57538e-59	1.35709e-57	124.567	protein_coding		LINC00944	0.105649	4.51922	11.8245	6.94399e-31	6.22999e-29	59.1974	lncRNA		FANCI	0.735487	7.13038	20.7955	1.44155e-77	1.29872e-75	165.949	protein_coding		FCER1G	-1.34546	7.11541	-23.0885	1.87359e-92
TM6SF1	-0.684867	4.75826	-20.7404	4.95768e-84	4.41132e-82	180.662	protein_coding		GSTCD	-0.279527	5.86855	-15.5681	1.05102e-50	9.20048e-49	104.409	protein_coding		ZNF667-AS1	0.642747	5.13952	17.0284	1.71914e-59	1.47505e-57	124.481	lncRNA		ZBTB20	-0.477397	6.41382	-11.8231	7.04755e-31	6.29679e-29	59.1828	protein_coding		FCGR2B	-1.21611	5.62389	-20.7919	1.51332e-77	1.35772e-75	165.901	protein_coding		PRICKLE2	-0.998469	5.96916	-23.0495	3.28008e-92
GPC6	-0.79493	6.44989	-20.7222	6.64083e-84	5.88476e-82	180.371	protein_coding		GTF3C3	-0.295335	5.62113	-15.5375	1.58459e-50	1.38134e-48	104.001	protein_coding		HS3ST3A1	0.678017	4.93948	17.024	1.8319e-59	1.55942e-57	124.417	protein_coding		ORC1	0.465332	5.47773	11.8186	7.40384e-31	6.58789e-29	59.134	protein_coding		RARRES2	-1.20683	8.41455	-20.7712	2.00922e-77	1.79518e-75	165.618	protein_coding		NID2	-1.22824	7.64132	-23.0483	3.33918e-92
RAC2	-0.713467	7.73867	-20.7193	6.96484e-84	6.14669e-82	180.324	protein_coding		SSX2IP	-0.503174	6.66883	-15.5372	1.59075e-50	1.38134e-48	103.997	protein_coding		ZCCHC24	0.909688	7.60498	17.0191	1.9638e-59	1.66515e-57	124.348	protein_coding		FEN1	0.429114	8.5737	11.8	9.06161e-31	7.99715e-29	58.9341	protein_coding		IFFO1	-0.558356	6.65361	-20.7693	2.06103e-77	1.83389e-75	165.593	protein_coding		DOCK10	-0.435509	4.21533	-23.0114	5.67115e-92
GBP1	-0.818708	7.4996	-20.7001	9.47668e-84	8.32946e-82	180.017	protein_coding		IGLL3P	1.15616	9.0136	15.5257	1.85574e-50	1.5986e-48	103.844	unprocessed_pseudogene		MAB21L2	1.16346	5.38499	17.0083	2.29064e-59	1.9347e-57	124.195	protein_coding		CD40	0.292219	6.11376	11.7851	1.06504e-30	9.36108e-29	58.7743	protein_coding		SUV39H2	0.587172	5.56516	20.7546	2.51994e-77	2.23304e-75	165.393	protein_coding		CTSL	-0.955586	8.78611	-22.9521	1.32737e-91
ETS1	-0.500858	6.84467	-20.676	1.3966e-83	1.22256e-81	179.631	protein_coding		NCAPH	-0.558453	6.9926	-15.5251	1.87117e-50	1.6055e-48	103.836	protein_coding		ST6GALNAC5	0.464236	4.6767	17.0071	2.33069e-59	1.96086e-57	124.178	protein_coding		ACKR4	0.527846	4.06453	11.7773	1.15839e-30	1.01404e-28	58.6912	protein_coding		CDK1	0.792947	7.78694	20.7405	3.05615e-77	2.69714e-75	165.201	protein_coding		RCN3	-0.733771	7.02525	-22.9354	1.68734e-91
OLFML2B	-1.00681	7.07332	-20.6431	2.36632e-83	2.06308e-81	179.105	protein_coding		UHRF1	-0.679864	8.46901	-15.5177	2.06621e-50	1.76584e-48	103.738	protein_coding		PTPN14	0.469057	5.59449	17.005	2.40201e-59	2.01304e-57	124.148	protein_coding		SASH3	0.499762	6.51626	11.7432	1.67675e-30	1.46189e-28	58.3253	protein_coding		CENPN	0.550644	6.39145	20.7389	3.12413e-77	2.74593e-75	165.179	protein_coding		PRICKLE1	-0.68146	4.74902	-22.9251	1.95575e-91
SGK1	-0.865409	9.14102	-20.6194	3.46291e-83	3.00703e-81	178.726	protein_coding		UBE3D	-0.220594	3.89794	-15.4793	3.4527e-50	2.93914e-48	103.228	protein_coding		ITGA1	0.627909	5.7426	16.9875	3.08096e-59	2.57207e-57	123.901	protein_coding		SERINC3	-0.378065	9.84012	-11.7325	1.88258e-30	1.63474e-28	58.2108	protein_coding		KLRB1	-1.14216	6.22188	-20.7301	3.52597e-77	3.08658e-75	165.058	protein_coding		SGCD	-0.534571	5.05264	-22.9079	2.50339e-91
KLHL6	-0.426909	4.29411	-20.6107	3.97821e-83	3.44067e-81	178.588	protein_coding		AUNIP	-0.488201	6.08457	-15.4769	3.56775e-50	3.02517e-48	103.196	protein_coding		C20orf194	0.530519	5.89454	16.9651	4.23943e-59	3.52557e-57	123.583	protein_coding		PBK	0.797851	8.34605	11.7294	1.94659e-30	1.68356e-28	58.1777	protein_coding		ATAD2	0.946071	6.88446	20.6927	5.87301e-77	5.12041e-75	164.55	protein_coding		PCDH7	-0.746646	4.6461	-22.8461	6.07128e-91
EFEMP1	-0.909025	6.05964	-20.5673	7.9838e-83	6.87752e-81	177.894	protein_coding		HEATR1	-0.28127	6.24469	-15.4727	3.77436e-50	3.18786e-48	103.14	protein_coding		QKI	0.500435	5.6616	16.9584	4.66354e-59	3.86341e-57	123.489	protein_coding		STIL	0.53172	7.73658	11.7232	2.08139e-30	1.79298e-28	58.1115	protein_coding		TRAF3IP3	-0.416663	4.47372	-20.6843	6.58407e-77	5.7173e-75	164.436	protein_coding		MRC2	-0.641209	7.68221	-22.8389	6.73027e-91
EMILIN1	-0.87823	6.763	-20.5658	8.17292e-83	7.01073e-81	177.871	protein_coding		EDRF1	-0.266716	5.49272	-15.4708	3.86837e-50	3.25455e-48	103.115	protein_coding		CALCRL	0.530395	5.16369	16.9572	4.74192e-59	3.91335e-57	123.472	protein_coding		RASGEF1B	0.136246	3.9586	11.6808	3.28555e-30	2.81905e-28	57.66	protein_coding		NOL10	0.340227	6.36087	20.6666	8.38893e-77	7.25542e-75	164.195	protein_coding		NAP1L3	-1.17552	4.22608	-22.8197	8.86115e-91
STOM	-0.552681	7.05968	-20.5656	8.20329e-83	7.01073e-81	177.867	protein_coding		ZNF639	-0.369012	6.68488	-15.4624	4.32803e-50	3.62716e-48	103.004	protein_coding		GREM1	1.73222	8.59541	16.9404	6.02297e-59	4.95166e-57	123.234	protein_coding		FUT8	0.548958	7.64654	11.6724	3.59795e-30	3.07489e-28	57.5701	protein_coding		OIP5	1.03499	7.11949	20.6661	8.45136e-77	7.28029e-75	164.187	protein_coding		C5AR1	-1.2399	6.50974	-22.8175	9.14069e-91
NEXN	-1.19707	5.94498	-20.4709	3.73016e-82	3.17533e-80	176.358	protein_coding		UCHL5	-0.298438	5.73556	-15.4538	4.85816e-50	4.05572e-48	102.889	protein_coding		BCAT1	0.822659	5.80953	16.9395	6.10196e-59	4.9976e-57	123.221	protein_coding		SORBS2	-0.33253	5.22122	-11.6589	4.16187e-30	3.54283e-28	57.4261	protein_coding		C1orf112	0.913199	5.95998	20.6524	1.01834e-76	8.73752e-75	164.002	protein_coding		C14orf132	-0.727761	5.46366	-22.8111	1.00145e-90
SH2B3	-0.559342	7.09995	-20.4332	6.80404e-82	5.74676e-80	175.76	protein_coding		NEDD1	-0.407945	7.28603	-15.4479	5.25472e-50	4.35317e-48	102.811	protein_coding		CD248	0.610198	8.01374	16.9151	8.63489e-59	7.04542e-57	122.876	protein_coding		CMKLR1	0.207983	5.34292	11.6571	4.24028e-30	3.59542e-28	57.4077	protein_coding		CD86	-0.703919	5.27408	-20.6378	1.2432e-76	1.06247e-74	163.803	protein_coding		MEF2C	-0.733957	5.95712	-22.7974	1.21892e-90
TBC1D10C	-0.447557	6.23818	-20.4198	8.42628e-82	7.07167e-80	175.547	protein_coding		NUP107	-0.410388	8.93462	-15.444	5.53438e-50	4.5644e-48	102.76	protein_coding		LRCH2	0.659929	4.20229	16.9047	1.00091e-58	8.136e-57	122.729	protein_coding		HCP5	0.642786	7.58867	11.6415	5.01301e-30	4.23403e-28	57.2421	lncRNA		TAGAP	-0.5003	4.60697	-20.6168	1.65635e-76	1.40999e-74	163.517	protein_coding		MS4A7	-1.03091	5.9461	-22.7696	1.81389e-90
PARVG	-0.314097	5.9858	-20.4197	8.43812e-82	7.07167e-80	175.545	protein_coding		IL18BP	0.309009	6.25979	15.4438	5.55192e-50	4.5644e-48	102.757	protein_coding		ACTN1	0.369134	8.91666	16.8304	2.87167e-58	2.32551e-56	121.682	protein_coding		IRF8	0.502964	8.79366	11.6375	5.23553e-30	4.39653e-28	57.1991	protein_coding		MAF	-0.447999	4.73675	-20.6153	1.6901e-76	1.43307e-74	163.497	protein_coding		PTGIS	-0.696608	5.03478	-22.7627	2.00268e-90
MXRA8	-0.783621	7.87127	-20.3928	1.29732e-81	1.08303e-79	175.117	protein_coding		NUP205	-0.305307	6.91644	-15.4276	6.89076e-50	5.64364e-48	102.542	protein_coding		LOX	0.901695	5.50593	16.8253	3.08576e-58	2.48956e-56	121.61	protein_coding		LRP1	-0.188938	5.66411	-11.6373	5.24606e-30	4.39653e-28	57.1971	protein_coding		ACP5	-1.04368	7.59187	-20.5862	2.51347e-76	2.1229e-74	163.102	protein_coding		COL4A2	-1.08781	9.35769	-22.6927	5.45534e-90
GFPT2	-0.862917	5.69065	-20.3624	2.10274e-81	1.74197e-79	174.636	protein_coding		CD22	0.20129	4.87767	15.4251	7.11883e-50	5.80843e-48	102.51	protein_coding		TGFBR1	0.487404	6.71309	16.82	3.32582e-58	2.67326e-56	121.536	protein_coding		TAGAP	0.296509	4.69612	11.631	5.61179e-30	4.68487e-28	57.1305	protein_coding		TRAIP	0.484242	5.66894	20.5637	3.41611e-76	2.87405e-74	162.796	protein_coding		MYLK	-0.744426	6.05249	-22.6648	8.13047e-90
CD8A	-0.855064	6.6496	-20.3448	2.78344e-81	2.29708e-79	174.356	protein_coding		DNASE1L3	0.577256	5.45346	15.4156	8.08792e-50	6.57433e-48	102.383	protein_coding		CSGALNACT2	0.521822	6.72405	16.8112	3.76766e-58	3.0172e-56	121.412	protein_coding		PTPN22	0.284505	4.03023	11.6295	5.70596e-30	4.74517e-28	57.114	protein_coding		PLEK	-0.95603	6.70086	-20.5622	3.48597e-76	2.92146e-74	162.776	protein_coding		MSN	-0.550001	6.897	-22.6487	1.02316e-89
SFMBT2	-0.301434	4.99792	-20.3294	3.55636e-81	2.92379e-79	174.112	protein_coding		CD33	0.379048	5.16277	15.4081	8.93032e-50	7.23188e-48	102.285	protein_coding		ENOX1	0.402813	4.8863	16.8003	4.39559e-58	3.50707e-56	121.258	protein_coding		YME1L1	0.125118	6.66685	11.621	6.24952e-30	5.17729e-28	57.024	protein_coding		MCM6	0.494961	6.99558	20.5567	3.75614e-76	3.13573e-74	162.702	protein_coding		CYBRD1	-1.30555	6.91317	-22.6341	1.26044e-89
TPSB2	-1.1251	7.24231	-20.3291	3.57365e-81	2.92687e-79	174.107	protein_coding		ERCC6L	-0.562867	5.94643	-15.4072	9.04012e-50	7.29349e-48	102.273	protein_coding		FBLN1	0.650668	6.46809	16.788	5.23331e-58	4.14485e-56	121.085	protein_coding		LCK	0.667054	6.61282	11.601	7.74247e-30	6.38961e-28	56.8122	protein_coding		SPARCL1	-1.42007	8.97662	-20.5428	4.54307e-76	3.77809e-74	162.512	protein_coding		FBLN2	-1.01373	6.37003	-22.6084	1.82162e-89
LILRB1	-0.499736	6.69484	-20.3272	3.68278e-81	3.00487e-79	174.077	protein_coding		TBC1D31	-0.463945	5.47241	-15.4046	9.3582e-50	7.52204e-48	102.238	protein_coding		GLI2	0.238157	4.90725	16.748	9.19975e-58	7.25975e-56	120.524	protein_coding		SLAMF1	0.179409	4.90856	11.5651	1.13699e-29	9.31215e-28	56.4321	protein_coding		HLA-DOA	-0.323368	5.89114	-20.5421	4.58119e-76	3.79519e-74	162.504	protein_coding		TMEM45A	-1.60459	6.70406	-22.5863	2.49696e-89
TSHZ3	-0.607001	5.80452	-20.2905	6.60891e-81	5.3721e-79	173.495	protein_coding		CD209	0.230198	5.39744	15.404	9.43616e-50	7.55661e-48	102.23	protein_coding		PCDH17	0.65339	6.35623	16.7472	9.30596e-58	7.31685e-56	120.513	protein_coding		RBPMS	-0.333166	6.0956	-11.5547	1.26955e-29	1.03586e-27	56.3231	protein_coding		DCN	-0.936563	7.0025	-20.5247	5.81319e-76	4.79236e-74	162.267	protein_coding		ALOX5AP	-1.29449	7.88169	-22.5583	3.72508e-89
MYO5A	-0.391107	4.64942	-20.2644	1.00046e-80	8.10188e-79	173.082	protein_coding		FAM161A	-0.33017	4.24541	-15.3942	1.075e-49	8.57703e-48	102.101	protein_coding		ISM1	0.488869	4.22073	16.7379	1.06134e-57	8.28457e-56	120.382	protein_coding		GGT7	-0.345357	6.21931	-11.5393	1.4975e-29	1.2127e-27	56.1598	protein_coding		CFH	-1.32324	5.88575	-20.5245	5.8292e-76	4.79236e-74	162.264	protein_coding		CAV1	-1.23192	8.39772	-22.5501	4.19007e-89
DSE	-0.350917	4.73691	-20.2615	1.04682e-80	8.44565e-79	173.037	protein_coding		CENPL	-0.448517	6.23682	-15.3934	1.08696e-49	8.64052e-48	102.09	protein_coding		BOC	0.437537	6.14872	16.7072	1.63601e-57	1.27244e-55	119.952	protein_coding		TIMM21	0.373334	7.50408	11.5252	1.73877e-29	1.40283e-27	56.012	protein_coding		TTF2	0.513649	5.08328	20.5031	7.80168e-76	6.3897e-74	161.973	protein_coding		BICC1	-0.759649	5.23094	-22.4632	1.44812e-88
TFEC	-0.500648	3.78458	-20.2596	1.07894e-80	8.6724e-79	173.007	protein_coding		MS4A6A	0.613916	6.61602	15.39	1.13723e-49	9.00704e-48	102.045	protein_coding		THBD	0.491012	5.84276	16.6962	1.91108e-57	1.48105e-55	119.798	protein_coding		MREG	0.423932	6.22984	11.5184	1.87057e-29	1.50355e-27	55.9398	protein_coding		HAUS6	0.847641	6.30955	20.4989	8.25929e-76	6.73896e-74	161.917	protein_coding		MFAP4	-1.12048	6.46983	-22.4554	1.61874e-88
IGSF6	-0.591654	4.49721	-20.2553	1.15535e-80	9.25221e-79	172.938	protein_coding		SPDL1	-0.4978	7.11324	-15.3847	1.22073e-49	9.63305e-48	101.975	protein_coding		MRC2	0.469742	7.70795	16.6896	2.09614e-57	1.61291e-55	119.706	protein_coding		TFCP2L1	-0.573039	7.01381	-11.5153	1.93348e-29	1.54836e-27	55.9071	protein_coding		SRGN	-1.10303	7.5983	-20.4686	1.24788e-75	1.01434e-73	161.506	protein_coding		MRC1	-1.56025	6.87077	-22.4394	2.0338e-88
VEGFC	-0.71578	5.78371	-20.2459	1.34041e-80	1.06946e-78	172.79	protein_coding		RBM28	-0.415276	7.93358	-15.3787	1.3219e-49	1.03935e-47	101.896	protein_coding		TRPS1	0.515985	5.16134	16.6619	3.09585e-57	2.3737e-55	119.318	protein_coding		RPL22L1	0.743756	9.92564	11.5109	2.02451e-29	1.61528e-27	55.8616	protein_coding		FHL1	-1.21784	6.68435	-20.4608	1.38623e-75	1.12259e-73	161.401	protein_coding		COL8A2	-0.808862	5.95573	-22.4049	3.32705e-88
NRP1	-0.420144	5.01847	-20.2403	1.46636e-80	1.16565e-78	172.701	protein_coding		CIDEB	0.500026	6.69791	15.3679	1.52561e-49	1.19517e-47	101.753	protein_coding		DACT1	1.0119	6.33607	16.6309	4.79103e-57	3.66048e-55	118.884	protein_coding		CD48	0.350622	5.84166	11.5026	2.21245e-29	1.75874e-27	55.7738	protein_coding		GGT5	-0.664298	6.32164	-20.4018	3.09322e-75	2.49558e-73	160.601	protein_coding		CXCL12	-1.2945	6.74917	-22.4027	3.43055e-88
CLEC4A	-0.720576	5.59892	-20.2262	1.83444e-80	1.4529e-78	172.478	protein_coding		MTHFD2L	-0.300163	4.62605	-15.3671	1.54096e-49	1.20284e-47	101.743	protein_coding		SMARCA1	0.628821	5.15351	16.5945	7.97902e-57	6.07473e-55	118.377	protein_coding		PRSS23	-0.474622	7.56994	-11.5013	2.24333e-29	1.77675e-27	55.7601	protein_coding		P2RY8	-0.712496	5.60634	-20.3925	3.51157e-75	2.82257e-73	160.475	protein_coding		FLI1	-0.426502	4.74626	-22.3968	3.73418e-88
THY1	-0.827489	8.26085	-20.2143	2.21423e-80	1.7473e-78	172.291	protein_coding		RHOH	0.534751	5.33503	15.3601	1.69275e-49	1.31657e-47	101.65	protein_coding		ZEB2	0.436326	4.44662	16.5537	1.41498e-56	1.0735e-54	117.808	protein_coding		ARHGAP25	0.24566	5.57412	11.4937	2.43092e-29	1.9183e-27	55.6807	protein_coding		MAD2L1	0.892754	7.83665	20.3903	3.6162e-75	2.8959e-73	160.446	protein_coding		CYP1B1	-1.29935	4.86735	-22.3567	6.60877e-88
MGP	-1.17527	6.35628	-20.2059	2.52866e-80	1.98817e-78	172.158	protein_coding		MRPL19	-0.380728	6.23413	-15.3511	1.90651e-49	1.47751e-47	101.532	protein_coding		GLRB	0.301193	3.66669	16.5077	2.69372e-56	2.02939e-54	117.168	protein_coding		CD53	0.32225	5.80188	11.4835	2.70977e-29	2.12285e-27	55.5733	protein_coding		CMKLR1	-0.336508	5.29944	-20.3714	4.6771e-75	3.73167e-73	160.19	protein_coding		NCF2	-1.21651	5.99211	-22.3116	1.25683e-87
MITF	-0.592804	5.27317	-20.1983	2.85246e-80	2.23463e-78	172.038	protein_coding		RSRC1	-0.491242	5.34663	-15.3484	1.97677e-49	1.52649e-47	101.496	protein_coding		THSD7A	0.401469	4.0177	16.5022	2.90725e-56	2.18266e-54	117.092	protein_coding		USP43	0.303381	5.57991	11.4779	2.87468e-29	2.24391e-27	55.5149	protein_coding		SP110	-0.579059	7.07486	-20.366	5.03487e-75	4.00235e-73	160.116	protein_coding		FILIP1L	-0.77614	6.62668	-22.3111	1.26684e-87
CYTIP	-1.03389	6.41464	-20.1909	3.21097e-80	2.50642e-78	171.92	protein_coding		TOPBP1	-0.431338	8.68256	-15.3216	2.82114e-49	2.16308e-47	101.143	protein_coding		MICU3	0.538015	3.34918	16.4981	3.07942e-56	2.30392e-54	117.035	protein_coding		DCLRE1B	0.282463	6.56308	11.4678	3.19998e-29	2.48885e-27	55.4088	protein_coding		GGCT	0.609196	10.9962	20.3647	5.12577e-75	4.05968e-73	160.098	protein_coding		SYT11	-0.423617	4.90028	-22.3101	1.28347e-87
CPA3	-1.33666	6.92199	-20.1136	1.09169e-79	8.49083e-78	170.701	protein_coding		FBXO45	-0.424106	6.6088	-15.3177	2.96991e-49	2.2691e-47	101.092	protein_coding		LBH	0.757868	7.59273	16.4902	3.43833e-56	2.56357e-54	116.925	protein_coding		FANCD2	0.227627	5.01914	11.4638	3.34012e-29	2.58854e-27	55.3665	protein_coding		MZB1	-1.30489	6.48399	-20.3207	9.32194e-75	7.35617e-73	159.503	protein_coding		CD248	-0.796515	8.00207	-22.2485	3.08563e-87
SLAMF7	-0.773082	5.80987	-20.1066	1.21863e-79	9.44416e-78	170.592	protein_coding		FCRLA	0.266806	3.97872	15.3014	3.68822e-49	2.80798e-47	100.877	protein_coding		NKX3-2	0.435532	5.42748	16.4665	4.78532e-56	3.55561e-54	116.597	protein_coding		CD52	0.729797	7.28424	11.4608	3.44802e-29	2.66261e-27	55.335	protein_coding		CENPI	0.469314	4.46134	20.3196	9.45922e-75	7.43736e-73	159.488	protein_coding		RAI14	-1.01382	7.8221	-22.2347	3.75652e-87
TSPYL5	-0.803659	5.41468	-20.0906	1.56919e-79	1.21175e-77	170.34	protein_coding		PRIM2	-0.498647	5.96583	-15.2944	4.04877e-49	3.07166e-47	100.785	protein_coding		TIE1	0.353754	4.32846	16.466	4.82056e-56	3.56952e-54	116.589	protein_coding		HCST	0.36594	6.64648	11.4279	4.88574e-29	3.74608e-27	54.9904	protein_coding		CENPE	0.946021	6.80517	20.3122	1.04527e-74	8.18874e-73	159.389	protein_coding		LTBP1	-0.909322	7.80183	-22.182	7.94469e-87
PIP4K2A	-0.359285	6.77281	-20.0452	3.21333e-79	2.45508e-77	169.626	protein_coding		IL10RA	0.747059	6.58681	15.2915	4.20705e-49	3.18059e-47	100.747	protein_coding		HSPB8	0.565689	5.45375	16.4458	6.3897e-56	4.71529e-54	116.309	protein_coding		FLVCR2	0.245849	5.75058	11.4244	5.07046e-29	3.87398e-27	54.9537	protein_coding		COL6A2	-1.02831	7.66735	-20.3022	1.19687e-74	9.34249e-73	159.254	protein_coding		SGCE	-1.33135	6.03446	-22.1727	9.06747e-87
ST8SIA4	-0.494612	4.21655	-20.0369	3.66746e-79	2.79217e-77	169.494	protein_coding		EEF1E1	-0.394622	6.52647	-15.2807	4.85097e-49	3.65462e-47	100.605	protein_coding		FBXO32	0.520663	5.2977	16.3865	1.45963e-55	1.07335e-53	115.488	protein_coding		NEURL1B	-0.52965	8.71704	-11.4149	5.60708e-29	4.26888e-27	54.8542	protein_coding		TRPV2	-0.442543	5.58453	-20.2987	1.25525e-74	9.76297e-73	159.206	protein_coding		EBF1	-0.618214	4.58151	-22.1428	1.38768e-86
HOPX	-0.427215	5.11611	-20.0253	4.40316e-79	3.34053e-77	169.312	protein_coding		GEN1	-0.42595	4.6783	-15.2708	5.52908e-49	4.15103e-47	100.475	protein_coding		PLAT	0.932235	8.20794	16.3862	1.46442e-55	1.07335e-53	115.485	protein_coding		CD84	0.236772	5.22391	11.4121	5.77296e-29	4.37976e-27	54.8254	protein_coding		LTBP2	-0.811587	7.01137	-20.2958	1.30616e-74	1.01225e-72	159.167	protein_coding		HCK	-0.898699	6.66365	-22.137	1.50738e-86
OLFML1	-0.747546	5.90948	-20.0225	4.60066e-79	3.47816e-77	169.269	protein_coding		CD3E	0.537126	6.12509	15.2699	5.59713e-49	4.18758e-47	100.463	protein_coding		HSPG2	0.498124	7.39515	16.3626	2.03506e-55	1.48656e-53	115.158	protein_coding		RAC2	0.511536	7.73867	11.4117	5.7991e-29	4.3842e-27	54.8209	protein_coding		DOCK10	-0.520196	4.23128	-20.2951	1.31946e-74	1.0189e-72	159.157	protein_coding		MFAP2	-1.2677	8.03111	-22.1335	1.58381e-86
FRMD6	-1.11873	7.04987	-20.0037	6.19049e-79	4.66379e-77	168.973	protein_coding		SYNCRIP	-0.303233	8.34809	-15.269	5.66787e-49	4.22589e-47	100.451	protein_coding		MMRN2	0.405836	4.6751	16.3525	2.34056e-55	1.70396e-53	115.019	protein_coding		GPR65	0.527783	5.44694	11.4015	6.45421e-29	4.86248e-27	54.7151	protein_coding		GLIPR2	-0.9642	6.51601	-20.2829	1.5569e-74	1.19798e-72	158.992	protein_coding		CNN1	-1.80645	7.6139	-22.1284	1.70255e-86
MMP9	-1.11956	8.35054	-20.0006	6.50231e-79	4.8817e-77	168.924	protein_coding		MPHOSPH9	-0.468409	5.64483	-15.2638	6.07273e-49	4.51218e-47	100.382	protein_coding		SYNPO2	1.05757	6.04183	16.3314	3.13891e-55	2.2775e-53	114.727	protein_coding		SAMSN1	0.496833	5.13915	11.3694	9.05576e-29	6.79874e-27	54.3802	protein_coding		CXCL12	-1.26196	6.69218	-20.2815	1.58691e-74	1.21674e-72	158.973	protein_coding		DSE	-0.43374	4.68491	-22.1159	2.03354e-86
MRAS	-0.393445	5.93715	-19.9837	8.48734e-79	6.34994e-77	168.659	protein_coding		MRS2	-0.333659	5.9599	-15.2605	6.33711e-49	4.6925e-47	100.34	protein_coding		RCN3	0.542599	7.05088	16.3139	4.00031e-55	2.8928e-53	114.486	protein_coding		ERI1	0.414608	5.73165	11.3587	1.01414e-28	7.58746e-27	54.2683	protein_coding		KIF4A	0.857001	7.90944	20.2786	1.65061e-74	1.26111e-72	158.934	protein_coding		DLC1	-0.489037	5.13242	-22.1104	2.19969e-86
IL4I1	-0.631971	6.14726	-19.9755	9.65081e-79	7.19551e-77	168.531	protein_coding		CDC25A	-0.52841	6.14148	-15.2426	8.03095e-49	5.92646e-47	100.105	protein_coding		EBF1	0.467909	4.5949	16.2995	4.88353e-55	3.51973e-53	114.288	protein_coding		CUX1	-0.31576	7.30064	-11.3285	1.39297e-28	1.03858e-26	53.9545	protein_coding		MGP	-1.28881	6.07141	-20.2695	1.86661e-74	1.42112e-72	158.811	protein_coding		PRR16	-0.780424	4.78549	-22.103	2.44389e-86
FBN1	-1.0551	6.89866	-19.9723	1.01471e-78	7.53956e-77	168.481	protein_coding		GRN	0.430579	9.72527	15.2401	8.30497e-49	6.10783e-47	100.072	protein_coding		EPHA3	0.336277	3.91331	16.2966	5.08491e-55	3.65269e-53	114.248	protein_coding		FCGR1B	0.723293	5.71521	11.3236	1.46528e-28	1.08873e-26	53.9044	protein_coding		FIGNL1	0.84231	7.20477	20.2662	1.95223e-74	1.48109e-72	158.766	protein_coding		CTSB	-0.766811	10.0035	-22.0815	3.31752e-86
FBXL7	-0.55556	5.98414	-19.9577	1.27647e-78	9.45202e-77	168.252	protein_coding		DCAF13	-0.330844	6.20882	-15.2383	8.50803e-49	6.23595e-47	100.048	protein_coding		CNIH3	0.296388	4.30475	16.2764	6.72706e-55	4.81631e-53	113.97	protein_coding		C1QBP	0.407678	10.1794	11.3101	1.68946e-28	1.25101e-26	53.7637	protein_coding		CDC6	1.11915	6.56939	20.2073	4.33655e-74	3.27849e-72	157.971	protein_coding		LBH	-1.04885	7.54261	-22.0651	4.1843e-86
COL6A3	-1.03788	10.827	-19.9377	1.75119e-78	1.2923e-76	167.937	protein_coding		NOP58	-0.476442	10.493	-15.2149	1.15841e-48	8.46186e-47	99.7414	protein_coding		PRKG1	0.334707	5.08278	16.2732	7.03269e-55	5.01851e-53	113.926	protein_coding		TRMT5	0.225448	9.05847	11.3037	1.80516e-28	1.33212e-26	53.6982	protein_coding		KIF20B	0.601562	7.45273	20.1991	4.84977e-74	3.65372e-72	157.86	protein_coding		ZNF667-AS1	-0.851604	5.11969	-22.0301	6.87347e-86
FERMT3	-0.644297	6.66927	-19.9346	1.83811e-78	1.35183e-76	167.889	protein_coding		INTS2	-0.644716	6.42583	-15.1995	1.41911e-48	1.03313e-46	99.54	protein_coding		LTBP2	0.643223	7.14828	16.2711	7.24e-55	5.14945e-53	113.897	protein_coding		RASL11A	0.479242	5.52401	11.2755	2.42651e-28	1.78456e-26	53.4058	protein_coding		KNTC1	0.796104	6.7482	20.1915	5.37378e-74	4.03444e-72	157.758	protein_coding		DPYD	-0.531824	4.57519	-22.004	9.96436e-86
TCF4	-0.738696	7.34857	-19.9222	2.23414e-78	1.63751e-76	167.695	protein_coding		THUMPD2	-0.417854	7.13341	-15.1835	1.75289e-48	1.27184e-46	99.3304	protein_coding		LMOD1	0.763019	5.64743	16.2331	1.22464e-54	8.62515e-53	113.374	protein_coding		HNRNPL	0.57734	8.68734	11.2697	2.57675e-28	1.88863e-26	53.3464	protein_coding		CCL13	-0.573969	5.49591	-20.1847	5.88978e-74	4.40632e-72	157.666	protein_coding		PLXNC1	-0.554866	5.24174	-22.0003	1.049e-85
TAGLN	-1.07821	9.0776	-19.9161	2.45628e-78	1.79425e-76	167.6	protein_coding		DOK2	0.396455	6.10183	15.1719	2.04232e-48	1.47689e-46	99.1787	protein_coding		PRDM6	0.383944	5.17403	16.2218	1.43005e-54	1.00391e-52	113.22	protein_coding		TNIP3	0.357757	3.87798	11.2651	2.70466e-28	1.97568e-26	53.2985	protein_coding		CDC25A	0.738713	6.18932	20.1845	5.90988e-74	4.40632e-72	157.663	protein_coding		C3AR1	-0.910985	7.3325	-21.9986	1.07585e-85
KCTD12	-1.09059	8.49168	-19.8739	4.7754e-78	3.46489e-76	166.938	protein_coding		CASP8AP2	-0.348614	5.42243	-15.1652	2.23153e-48	1.60834e-46	99.0908	protein_coding		EML1	0.716151	4.87854	16.2198	1.47135e-54	1.02957e-52	113.192	protein_coding		CLEC7A	0.308439	4.59489	11.2476	3.24607e-28	2.36318e-26	53.1181	protein_coding		TNFSF8	-0.325811	4.65127	-20.1829	6.04005e-74	4.4879e-72	157.641	protein_coding		RGS2	-1.56954	8.68168	-21.9854	1.296e-85
IL21R	-0.368937	4.51946	-19.8654	5.45302e-78	3.93017e-76	166.806	protein_coding		RRM1	-0.421	8.80097	-15.1501	2.72085e-48	1.95449e-46	98.894	protein_coding		MMP2	0.363999	6.0502	16.2129	1.61724e-54	1.128e-52	113.098	protein_coding		C1QC	0.766857	8.62757	11.2211	4.27972e-28	3.10524e-26	52.8448	protein_coding		RBM15	0.336382	6.90569	20.1621	8.00926e-74	5.93069e-72	157.36	protein_coding		ST6GALNAC5	-0.611823	4.66433	-21.9836	1.32975e-85
TXNDC15	-0.410186	8.17038	-19.8456	7.44615e-78	5.34886e-76	166.496	protein_coding		U2SURP	-0.388172	6.97917	-15.1472	2.82947e-48	2.02579e-46	98.8552	protein_coding		CDH5	0.680367	6.27429	16.1947	2.08003e-54	1.44149e-52	112.848	protein_coding		ESCO2	0.203193	4.02116	11.2159	4.51856e-28	3.26757e-26	52.7911	protein_coding		JAM2	-0.848224	4.99576	-20.1164	1.48547e-73	1.0962e-71	156.745	protein_coding		SYNE1	-0.312048	4.16511	-21.9791	1.41769e-85
LTBP2	-0.674239	7.14828	-19.8448	7.53256e-78	5.39301e-76	166.484	protein_coding		CCDC77	-0.508553	5.50661	-15.1355	3.29705e-48	2.35277e-46	98.7034	protein_coding		GGT5	0.519881	6.44855	16.1803	2.5353e-54	1.75138e-52	112.651	protein_coding		CCL8	0.869925	6.41813	11.2119	4.71134e-28	3.39562e-26	52.7498	protein_coding		SMC2	0.810141	7.17071	20.1057	1.71843e-73	1.26381e-71	156.6	protein_coding		ECM2	-0.712833	5.41619	-21.975	1.50194e-85
A2M	-0.457947	7.51736	-19.8312	9.32926e-78	6.65734e-76	166.271	protein_coding		PAXIP1	-0.455057	7.94475	-15.1085	4.70351e-48	3.34537e-46	98.3508	protein_coding		JAM2	0.6823	5.14677	16.1774	2.64072e-54	1.8184e-52	112.611	protein_coding		FCER1G	0.827556	7.53669	11.2115	4.72987e-28	3.39765e-26	52.7459	protein_coding		GIMAP8	-0.546361	4.50471	-20.0963	1.94977e-73	1.42908e-71	156.474	protein_coding		S1PR3	-0.667752	6.06331	-21.9466	2.24912e-85
CAV1	-0.921125	8.49666	-19.8103	1.29557e-77	9.21472e-76	165.944	protein_coding		FANCM	-0.249638	4.62194	-15.107	4.79887e-48	3.402e-46	98.3309	protein_coding		FILIP1	0.520484	3.85733	16.1638	3.18256e-54	2.18455e-52	112.425	protein_coding		SEC22B	-0.532232	9.39814	-11.1925	5.76628e-28	4.12843e-26	52.5501	protein_coding		GIMAP7	-1.09953	5.43892	-20.0766	2.5459e-73	1.85971e-71	156.208	protein_coding		LOX	-1.16929	5.4933	-21.9399	2.47197e-85
PTAFR	-0.410497	6.70427	-19.791	1.75183e-77	1.2419e-75	165.643	protein_coding		ZWINT	-0.517588	9.61575	-15.0998	5.27547e-48	3.72766e-46	98.2369	protein_coding		MMP16	0.142371	4.0953	16.1618	3.27427e-54	2.24039e-52	112.397	protein_coding		GEMIN4	0.322908	7.40251	11.1914	5.8307e-28	4.16077e-26	52.5391	protein_coding		ITGAM	-1.08199	5.96349	-20.076	2.56693e-73	1.86876e-71	156.2	protein_coding		FCGR2B	-1.12295	5.62874	-21.9201	3.27442e-85
CD93	-0.680609	7.67711	-19.7901	1.77787e-77	1.25624e-75	165.629	protein_coding		CD1C	0.348252	6.23862	15.0803	6.81452e-48	4.78888e-46	97.9829	protein_coding		FGFR1	0.30186	6.20007	16.1308	5.01384e-54	3.41985e-52	111.974	protein_coding		SORBS1	-0.372908	6.7555	-11.179	6.63548e-28	4.71948e-26	52.4113	protein_coding		PLEKHO2	-0.560234	7.23146	-20.067	2.89903e-73	2.10345e-71	156.079	protein_coding		BOC	-0.582967	6.13328	-21.8533	8.42756e-85
JAM2	-0.716965	5.14677	-19.7837	1.96433e-77	1.38348e-75	165.529	protein_coding		PRIM1	-0.539922	7.5875	-15.0802	6.82165e-48	4.78888e-46	97.9819	protein_coding		NPR3	0.392897	4.65203	16.1	7.65674e-54	5.2061e-52	111.553	protein_coding		SAP30	0.220042	5.87392	11.1679	7.44695e-28	5.27928e-26	52.2972	protein_coding		SPOCK2	-0.517491	6.53131	-20.0599	3.19008e-73	2.30688e-71	155.984	protein_coding		PLEKHO2	-0.535781	7.24112	-21.8464	9.28985e-85
ITK	-0.685659	5.45814	-19.7648	2.64126e-77	1.8542e-75	165.234	protein_coding		PRMT3	-0.576449	7.71101	-15.0719	7.60804e-48	5.32366e-46	97.8736	protein_coding		SERPINE1	0.863483	6.31858	16.0966	8.03279e-54	5.44467e-52	111.505	protein_coding		WDHD1	0.424418	4.66705	11.1675	7.47582e-28	5.28242e-26	52.2934	protein_coding		HSPE1	0.586359	10.7788	20.0095	6.30294e-73	4.52764e-71	155.306	protein_coding		SLC24A3	-1.14442	6.70324	-21.8437	9.65612e-85
HAVCR2	-0.37488	5.47544	-19.7571	2.98181e-77	2.08649e-75	165.114	protein_coding		ABCE1	-0.411527	8.90881	-15.0652	8.29722e-48	5.78717e-46	97.7875	protein_coding		GJC1	0.413105	4.84453	16.0907	8.69971e-54	5.87829e-52	111.426	protein_coding		MAX	0.24089	7.49473	11.1668	7.52545e-28	5.30017e-26	52.2869	protein_coding		CCDC138	0.464562	5.08412	20.0084	6.39715e-73	4.58011e-71	155.291	protein_coding		CLEC2B	-0.731106	5.63474	-21.8194	1.36146e-84
ACP2	-0.394389	8.11875	-19.7516	3.2495e-77	2.26647e-75	165.028	protein_coding		CSTF3	-0.419079	7.24368	-15.04	1.15511e-47	8.00507e-46	97.4592	protein_coding		KIF26B	0.389115	5.08884	16.0623	1.2854e-53	8.65822e-52	111.038	protein_coding		E2F7	0.362875	5.64296	11.1651	7.66426e-28	5.38041e-26	52.2688	protein_coding		CD163	-1.06145	5.85814	-19.9987	7.29866e-73	5.20831e-71	155.159	protein_coding		TM6SF1	-0.754452	4.61977	-21.8107	1.53989e-84
NKG7	-0.808491	5.97842	-19.7105	6.17843e-77	4.2955e-75	164.388	protein_coding		NDC80	-0.775492	7.07595	-14.9972	2.02146e-47	1.39642e-45	96.9039	protein_coding		LATS2	0.367828	6.50722	16.0582	1.3606e-53	9.10803e-52	110.981	protein_coding		PARVA	-0.26535	6.9072	-11.158	8.24799e-28	5.77146e-26	52.1963	protein_coding		FXYD6	-0.968506	7.02016	-19.9961	7.55646e-73	5.37453e-71	155.125	protein_coding		MAP7D1	-0.643743	7.48141	-21.8078	1.60486e-84
RASGRP3	-0.278042	4.79564	-19.7075	6.47825e-77	4.4808e-75	164.341	protein_coding		LSM5	-0.505441	7.8152	-14.9876	2.29246e-47	1.57858e-45	96.779	protein_coding		TNFAIP6	1.2033	6.42853	16.0574	1.37559e-53	9.17994e-52	110.971	protein_coding		MND1	0.632665	6.23285	11.153	8.68336e-28	6.0565e-26	52.1454	protein_coding		HMMR	0.966035	8.09244	19.9945	7.7238e-73	5.47554e-71	155.103	protein_coding		TWIST1	-1.40633	5.61537	-21.7684	2.80208e-84
RGS1	-0.797247	6.33235	-19.7074	6.4864e-77	4.4808e-75	164.34	protein_coding		LILRB3	0.412709	7.24071	14.9738	2.74341e-47	1.88311e-45	96.6008	protein_coding		ENTPD1	0.601209	6.49244	16.0468	1.59007e-53	1.05786e-51	110.827	protein_coding		PLXNA2	-0.238571	6.30056	-11.1466	9.28194e-28	6.45319e-26	52.0795	protein_coding		EXOSC2	0.382358	6.29233	19.9869	8.552e-73	6.04286e-71	155.002	protein_coding		ELK3	-0.573365	6.82153	-21.729	4.89604e-84
QKI	-0.503599	5.6616	-19.6959	7.75918e-77	5.34296e-75	164.161	protein_coding		DENR	-0.25282	7.06685	-14.9683	2.94941e-47	2.01811e-45	96.529	protein_coding		TMEM45A	1.13229	6.80139	16.0438	1.65644e-53	1.09864e-51	110.786	protein_coding		DEPDC1	0.543202	6.15955	11.1441	9.52298e-28	6.59955e-26	52.0542	protein_coding		BARD1	0.558953	6.80871	19.9499	1.40949e-72	9.92701e-71	154.504	protein_coding		COL11A1	-1.75038	6.39099	-21.7211	5.47403e-84
BNC2	-0.550906	5.11079	-19.6935	8.05088e-77	5.52623e-75	164.124	protein_coding		MSH2	-0.629545	7.84038	-14.9629	3.16211e-47	2.15682e-45	96.4599	protein_coding		MCAM	0.687748	7.81403	16.019	2.32712e-53	1.53405e-51	110.448	protein_coding		SUV39H2	0.327678	5.593	11.127	1.13713e-27	7.85531e-26	51.8788	protein_coding		AOC3	-1.31117	6.55759	-19.9244	1.99033e-72	1.39723e-70	154.16	protein_coding		CSGALNACT2	-0.681922	6.71362	-21.6986	7.521e-84
SPARC	-1.00856	10.2214	-19.6476	1.64864e-76	1.12807e-74	163.41	protein_coding		USP37	-0.365925	5.54077	-14.9517	3.66168e-47	2.4819e-45	96.3143	protein_coding		CAMSAP2	0.402821	6.64162	16.0173	2.3824e-53	1.56572e-51	110.425	protein_coding		FOXO3	-0.339177	8.33696	-11.1195	1.22833e-27	8.45828e-26	51.8026	protein_coding		CYSLTR1	-0.410285	4.08571	-19.9045	2.60061e-72	1.81975e-70	153.894	protein_coding		ITGAV	-0.738955	10.133	-21.6638	1.2292e-83
BGN	-0.979052	7.4862	-19.586	4.31131e-76	2.94067e-74	162.453	protein_coding		VRK1	-0.541125	8.04737	-14.9509	3.70096e-47	2.50069e-45	96.3037	protein_coding		MFGE8	0.56187	7.27632	16.0063	2.77081e-53	1.81547e-51	110.275	protein_coding		P2RY13	0.534361	5.01732	11.1155	1.28044e-27	8.77137e-26	51.7615	protein_coding		FLVCR1	0.930863	7.89981	19.8932	3.02991e-72	2.10652e-70	153.742	protein_coding		EVL	-0.556727	6.28875	-21.6621	1.25975e-83
CXCL13	-1.74496	6.15663	-19.5832	4.50478e-76	3.06297e-74	162.409	protein_coding		DDX52	-0.379655	6.01365	-14.95	3.74272e-47	2.52103e-45	96.2926	protein_coding		TPST1	0.570097	6.15024	16.0033	2.88609e-53	1.88529e-51	110.234	protein_coding		RFX5	0.247117	7.94437	11.1123	1.32435e-27	9.03318e-26	51.7282	protein_coding		CCR2	-0.601905	4.43172	-19.8884	3.23212e-72	2.2399e-70	153.677	protein_coding		LATS2	-0.506844	6.48421	-21.5911	3.42944e-83
TPSAB1	-0.770851	6.79058	-19.5815	4.62382e-76	3.13405e-74	162.383	protein_coding		NHLRC2	-0.253582	4.94158	-14.9348	4.56596e-47	3.066e-45	96.0953	protein_coding		PRR16	0.563745	4.8229	15.9968	3.15209e-53	2.05285e-51	110.147	protein_coding		IGF1R	-0.321951	6.39994	-11.0902	1.66356e-27	1.13047e-25	51.5028	protein_coding		SIGLEC1	-0.537732	5.65571	-19.8768	3.77844e-72	2.61014e-70	153.522	protein_coding		GNG11	-0.691901	5.55206	-21.563	5.10054e-83
CCL8	-1.17973	6.41813	-19.58	4.72917e-76	3.19544e-74	162.361	protein_coding		PIK3CD	0.348999	5.97679	14.9323	4.71479e-47	3.15519e-45	96.0635	protein_coding		ZBTB20	0.585699	6.41382	15.986	3.65536e-53	2.37346e-51	109.999	protein_coding		CCSAP	0.211339	4.79932	11.0899	1.66785e-27	1.13047e-25	51.5003	protein_coding		RAC2	-0.887636	7.60439	-19.8382	6.35951e-72	4.37915e-70	153.003	protein_coding		ARMCX2	-1.2945	6.86124	-21.552	5.95789e-83
GAS1	-1.02086	5.44082	-19.5629	6.17488e-76	4.15929e-74	162.095	protein_coding		CCNB1	-0.713579	8.40042	-14.9321	4.72797e-47	3.15519e-45	96.0607	protein_coding		GNG11	0.502184	5.58342	15.9701	4.54374e-53	2.94146e-51	109.783	protein_coding		DOCK8	0.367743	4.94184	11.0546	2.40017e-27	1.62177e-25	51.1405	protein_coding		DDIAS	0.801749	6.84865	19.8011	1.04702e-71	7.1869e-70	152.507	protein_coding		SLAMF8	-0.772856	5.95185	-21.5006	1.22971e-82
SYT11	-0.324267	4.93915	-19.5602	6.44394e-76	4.32704e-74	162.053	protein_coding		GGCT	-0.424345	10.9477	-14.9294	4.89489e-47	3.24717e-45	96.0263	protein_coding		DCHS1	0.478262	6.48278	15.9418	6.68977e-53	4.3178e-51	109.399	protein_coding		IL18BP	0.231366	6.25979	11.0522	2.45878e-27	1.65619e-25	51.1166	protein_coding		ASB2	-0.569748	5.08216	-19.7687	1.61939e-71	1.10805e-69	152.072	protein_coding		MOXD1	-0.707494	5.12661	-21.4863	1.50364e-82
COX7A1	-0.792706	7.01008	-19.5356	9.44739e-76	6.3242e-74	161.672	protein_coding		MCM3	-0.412501	9.34544	-14.9294	4.89583e-47	3.24717e-45	96.0261	protein_coding		CSRP1	0.596505	9.94754	15.9358	7.25314e-53	4.66748e-51	109.318	protein_coding		SH3PXD2A	-0.246487	6.35042	-11.0484	2.55689e-27	1.71693e-25	51.078	protein_coding		LCP2	-0.579314	4.93617	-19.7479	2.14188e-71	1.45635e-69	151.794	protein_coding		CD86	-0.58315	5.25001	-21.4534	2.38832e-82
GREM1	-1.73291	8.59541	-19.5279	1.06533e-75	7.10942e-74	161.552	protein_coding		SNRPF	-0.418197	10.0746	-14.9205	5.49953e-47	3.63642e-45	95.9107	protein_coding		DENND5A	0.61731	7.51886	15.9255	8.35279e-53	5.35917e-51	109.178	protein_coding		DLGAP5	0.605293	7.74506	11.0428	2.70889e-27	1.81336e-25	51.0209	protein_coding		CLIP4	-0.601208	4.65215	-19.747	2.16823e-71	1.46964e-69	151.782	protein_coding		GLI2	-0.303969	4.90682	-21.3859	6.17863e-82
NLRC3	-0.632045	4.7413	-19.5223	1.16215e-75	7.73168e-74	161.465	protein_coding		DTYMK	-0.246706	5.97546	-14.9184	5.6517e-47	3.71856e-45	95.8836	protein_coding		C1QTNF3	0.391091	5.45854	15.9154	9.58528e-53	6.13174e-51	109.041	protein_coding		PRKG1	-0.252081	5.08278	-11.0283	3.14344e-27	2.09776e-25	50.8739	protein_coding		NDN	-1.12503	6.86919	-19.745	2.2283e-71	1.50564e-69	151.754	protein_coding		MRAS	-0.48597	5.87871	-21.3768	7.02735e-82
CHST15	-0.505278	5.94754	-19.5203	1.19786e-75	7.94482e-74	161.435	protein_coding		PPHLN1	-0.213385	6.05433	-14.9182	5.66519e-47	3.71856e-45	95.8813	protein_coding		UNC5B	0.417507	6.94316	15.8947	1.27032e-52	8.10235e-51	108.762	protein_coding		SPCS3	0.280237	8.26537	11.0263	3.20988e-27	2.13551e-25	50.8532	protein_coding		ENTPD1	-0.766101	6.27386	-19.739	2.41552e-71	1.62706e-69	151.674	protein_coding		PMP22	-0.465768	5.45781	-21.3676	7.99557e-82
NXN	-0.970809	8.0857	-19.5182	1.23789e-75	8.18521e-74	161.403	protein_coding		CENPQ	-0.575406	4.72696	-14.918	5.67536e-47	3.71856e-45	95.8795	protein_coding		TIMP1	0.66307	11.5384	15.8837	1.47588e-52	9.38571e-51	108.613	protein_coding		TRAFD1	0.158485	6.38958	11.0116	3.73367e-27	2.46879e-25	50.7038	protein_coding		CCL21	-1.16667	6.49203	-19.7384	2.43385e-71	1.63431e-69	151.667	protein_coding		COL4A1	-1.10059	9.95217	-21.3608	8.79434e-82
CD247	-0.574335	6.00333	-19.4902	1.91306e-75	1.2611e-73	160.969	protein_coding		PUS7	-0.576931	8.79015	-14.9112	6.20622e-47	4.05411e-45	95.7908	protein_coding		PMP22	0.327823	5.48671	15.8489	2.36873e-52	1.49756e-50	108.142	protein_coding		NCF1	0.408958	5.80712	11.0108	3.76434e-27	2.48148e-25	50.6957	protein_coding		HLA-DRB6	-0.455767	5.61353	-19.7374	2.46976e-71	1.65329e-69	151.652	transcribed_unprocessed_pseudogene		CD163	-0.993758	5.86785	-21.3484	1.04677e-81
ARHGDIB	-0.55936	8.46282	-19.4747	2.43327e-75	1.59915e-73	160.729	protein_coding		PLCD1	0.409715	7.7342	14.9051	6.71978e-47	4.37635e-45	95.7119	protein_coding		CLEC11A	0.478826	6.18707	15.8448	2.50414e-52	1.57856e-50	108.087	protein_coding		CYB5D1	0.353075	6.74216	10.9994	4.22996e-27	2.77995e-25	50.5805	protein_coding		VCAM1	-1.26146	7.03869	-19.7333	2.60913e-71	1.74119e-69	151.597	protein_coding		TNFSF4	-1.13655	5.64434	-21.3305	1.34709e-81
LOXL1	-1.04924	7.07666	-19.474	2.46151e-75	1.61281e-73	160.718	protein_coding		RBL1	-0.337881	4.72453	-14.8915	8.02034e-47	5.20768e-45	95.5363	protein_coding		RHOQ	0.433589	7.19844	15.8417	2.61438e-52	1.64326e-50	108.044	protein_coding		GM2A	0.264556	6.71003	10.9902	4.65029e-27	3.04693e-25	50.4868	protein_coding		GMPS	0.465899	7.17075	19.7205	3.09915e-71	2.06184e-69	151.426	protein_coding		SRPX	-1.53557	6.5016	-21.2967	2.16555e-81
WBP1L	-0.394785	8.40031	-19.4529	3.41415e-75	2.22352e-73	160.392	protein_coding		LIN9	-0.198838	3.90166	-14.8774	9.6333e-47	6.23626e-45	95.3545	protein_coding		SYNE1	0.21713	4.18638	15.8366	2.79942e-52	1.75447e-50	107.976	protein_coding		SEMA5A	-0.569951	7.50854	-10.9897	4.67381e-27	3.05309e-25	50.4819	protein_coding		CD209	-0.298207	5.39154	-19.7016	3.99331e-71	2.64857e-69	151.173	protein_coding		CALCRL	-0.688875	5.15562	-21.2571	3.77895e-81
CYSLTR1	-0.316231	4.13903	-19.4332	4.6325e-75	3.00792e-73	160.088	protein_coding		DDX20	-0.366283	6.61731	-14.8586	1.22939e-46	7.91125e-45	95.1125	protein_coding		RERG	0.695927	4.6886	15.8318	2.98957e-52	1.86822e-50	107.911	protein_coding		CXXC4	-0.32314	5.43518	-10.9857	4.86742e-27	3.16998e-25	50.4417	protein_coding		KIF11	0.998955	7.46485	19.699	4.13379e-71	2.73336e-69	151.139	protein_coding		THEMIS2	-0.754043	5.98603	-21.2501	4.16924e-81
LUM	-0.999401	8.78031	-19.4272	5.08757e-75	3.29351e-73	159.995	protein_coding		FAM107A	0.389785	5.76302	14.85	1.37421e-46	8.81697e-45	95.002	protein_coding		LSAMP	0.333292	4.72832	15.8299	3.06844e-52	1.91198e-50	107.885	protein_coding		LILRB4	0.242545	4.41574	10.9792	5.19976e-27	3.37625e-25	50.3765	protein_coding		TNFSF13B	-1.21255	6.64535	-19.6866	4.88202e-71	3.21826e-69	150.973	protein_coding		FHL1	-1.27852	6.75111	-21.2302	5.51259e-81
IGFBP7	-0.618165	8.90147	-19.4233	5.40051e-75	3.48567e-73	159.935	protein_coding		LITAF	0.313389	7.60739	14.8448	1.47081e-46	9.40886e-45	94.9346	protein_coding		FEZ1	0.38749	5.69306	15.8134	3.83786e-52	2.38454e-50	107.663	protein_coding		SNX33	-0.181939	6.7604	-10.9787	5.2265e-27	3.38345e-25	50.3714	protein_coding		TAGLN	-1.22935	8.83352	-19.68	5.33458e-71	3.50591e-69	150.885	protein_coding		PDE1A	-0.465816	3.87039	-21.219	6.45096e-81
SELPLG	-0.374065	6.56351	-19.3961	8.23563e-75	5.284e-73	159.515	protein_coding		TOP2A	-0.560579	7.33157	-14.823	1.95003e-46	1.24011e-44	94.6547	protein_coding		HLX	0.499044	6.56818	15.7831	5.78541e-52	3.5843e-50	107.255	protein_coding		MAGED2	-0.340898	8.25764	-10.9483	7.13722e-27	4.60659e-25	50.0635	protein_coding		CEP83	0.730405	5.05109	19.6639	6.63017e-71	4.34417e-69	150.668	protein_coding		PLAT	-1.22721	8.18394	-21.2018	8.20483e-81
C11orf96	-1.0266	9.15247	-19.3919	8.78224e-75	5.61804e-73	159.451	protein_coding		ZNF92	-0.331662	4.99173	-14.8188	2.05875e-46	1.3054e-44	94.6009	protein_coding		RASL12	0.519074	6.11767	15.7819	5.88363e-52	3.63474e-50	107.238	protein_coding		LIMS2	-0.393325	6.60407	-10.9353	8.14679e-27	5.23452e-25	49.9328	protein_coding		PSAP	-0.545382	10.9581	-19.6616	6.83298e-71	4.46353e-69	150.638	protein_coding		SLA	-0.665707	6.85721	-21.1698	1.2866e-80
STAT4	-0.499504	5.74089	-19.3778	1.09205e-74	6.96528e-73	159.234	protein_coding		HSPD1	-0.36371	7.84562	-14.8167	2.11634e-46	1.338e-44	94.5735	protein_coding		DSEL	0.238389	3.48898	15.7813	5.92987e-52	3.65287e-50	107.231	protein_coding		GIMAP7	0.628534	5.65358	10.9351	8.15851e-27	5.23452e-25	49.9313	protein_coding		ERCC6L	0.743122	5.9697	19.617	1.24329e-70	8.09708e-69	150.042	protein_coding		IGFBP3	-1.18527	9.07919	-21.159	1.49627e-80
MMP2	-0.375199	6.0502	-19.3548	1.55988e-74	9.91993e-73	158.879	protein_coding		EXO1	-0.546424	6.81616	-14.8139	2.19414e-46	1.38314e-44	94.5377	protein_coding		FBLN2	0.715407	6.43148	15.7564	8.30926e-52	5.10406e-50	106.895	protein_coding		SLC2A5	0.233443	5.28367	10.9298	8.61201e-27	5.50914e-25	49.8779	protein_coding		ANLN	1.10245	8.09719	19.6029	1.50306e-70	9.75951e-69	149.853	protein_coding		GPX8	-1.19335	6.47747	-21.143	1.87291e-80
HLX	-0.52618	6.56818	-19.349	1.70647e-74	1.08204e-72	158.79	protein_coding		RBP5	0.386819	5.73976	14.8081	2.36606e-46	1.48718e-44	94.4629	protein_coding		KLHL5	0.644375	5.57854	15.7525	8.75868e-52	5.36488e-50	106.843	protein_coding		LAMC1	-0.345358	8.96549	-10.9295	8.63777e-27	5.50932e-25	49.8749	protein_coding		CD33	-0.499239	5.14786	-19.5797	2.05181e-70	1.32827e-68	149.543	protein_coding		LAMB2	-0.820404	6.86077	-21.1421	1.89662e-80
CCR2	-0.453337	4.50312	-19.3464	1.77546e-74	1.12249e-72	158.75	protein_coding		FAM214B	0.357316	7.30499	14.8026	2.54029e-46	1.59206e-44	94.3924	protein_coding		RASSF8	0.256556	4.39873	15.7301	1.18553e-51	7.2411e-50	106.542	protein_coding		KLRC4	0.134899	2.9742	10.9262	8.93557e-27	5.6825e-25	49.8414	protein_coding		EZH2	0.86801	7.84804	19.5575	2.76009e-70	1.77088e-68	149.248	protein_coding		VSIG4	-1.11156	6.60968	-21.079	4.58647e-80
FNDC1	-1.50453	6.36002	-19.3278	2.36801e-74	1.49274e-72	158.463	protein_coding		L2HGDH	-0.305752	5.25624	-14.7944	2.82237e-46	1.76374e-44	94.2879	protein_coding		DIP2C	0.521797	6.67534	15.7047	1.67061e-51	1.01752e-49	106.202	protein_coding		GATA3	0.222555	4.48382	10.9197	9.55214e-27	6.05678e-25	49.7755	protein_coding		RFTN1	-0.528649	5.95495	-19.551	3.01158e-70	1.92652e-68	149.161	protein_coding		EVI2B	-1.17056	6.45849	-21.0751	4.85032e-80
ADAMTS2	-0.62055	6.52092	-19.3142	2.92128e-74	1.83616e-72	158.254	protein_coding		HJURP	-0.51714	7.54016	-14.7854	3.17321e-46	1.97727e-44	94.1716	protein_coding		TSHZ2	0.330776	4.83094	15.6708	2.64196e-51	1.60462e-49	105.746	protein_coding		ATF6	-0.263257	7.60321	-10.914	1.01212e-26	6.39884e-25	49.7183	protein_coding		CLMP	-0.997916	5.49269	-19.5458	3.23139e-70	2.06104e-68	149.091	protein_coding		MFGE8	-0.748832	7.25637	-21.0423	7.67369e-80
TGFB1I1	-0.931081	8.26579	-19.312	3.02105e-74	1.89337e-72	158.221	protein_coding		HLA-DPB1	0.651239	7.14	14.7811	3.35428e-46	2.08409e-44	94.1166	protein_coding		RNF180	0.271999	3.30934	15.6664	2.80082e-51	1.69634e-49	105.688	protein_coding		WFDC1	-0.672328	7.65386	-10.9132	1.01982e-26	6.42875e-25	49.7108	protein_coding		SKA3	0.78509	7.44385	19.5432	3.34291e-70	2.12589e-68	149.057	protein_coding		CSF2RB	-1.19461	6.22443	-20.9964	1.45803e-79
THBD	-0.492375	5.84276	-19.2889	4.32142e-74	2.69273e-72	157.864	protein_coding		RRM2	-0.661713	10.2014	-14.7803	3.39044e-46	2.10052e-44	94.1059	protein_coding		C1S	1.08589	8.75569	15.6647	2.86896e-51	1.73276e-49	105.664	protein_coding		SEH1L	0.400779	7.94434	10.904	1.12065e-26	7.04378e-25	49.6177	protein_coding		DNAJC9	0.442995	7.11071	19.5281	4.09523e-70	2.5891e-68	148.855	protein_coding		ADAMTS5	-0.771091	5.32818	-20.9844	1.7248e-79
RNASE6	-0.772843	7.34596	-19.268	5.96517e-74	3.70629e-72	157.543	protein_coding		NUP160	-0.350048	6.21134	-14.7774	3.51718e-46	2.17281e-44	94.0695	protein_coding		LRRC17	0.353227	4.51964	15.6321	4.44775e-51	2.67881e-49	105.229	protein_coding		RAD51	0.276313	5.78638	10.9014	1.15049e-26	7.21039e-25	49.5917	protein_coding		CORO1A	-0.939756	7.5213	-19.5206	4.52815e-70	2.85445e-68	148.755	protein_coding		PRELP	-0.742824	6.19159	-20.9842	1.72883e-79
SYNE1	-0.227436	4.18638	-19.2596	6.78617e-74	4.20431e-72	157.415	protein_coding		SIGLEC7	0.218188	5.67343	14.772	3.77079e-46	2.32285e-44	94.0004	protein_coding		PTGIS	0.504747	5.067	15.6311	4.51062e-51	2.70913e-49	105.215	protein_coding		BTLA	0.258798	4.48563	10.8772	1.47173e-26	9.19704e-25	49.3484	protein_coding		BNC2	-0.574254	4.96629	-19.519	4.62281e-70	2.90565e-68	148.734	protein_coding		COMP	-1.7553	6.00542	-20.9714	2.06877e-79
LIX1L	-0.432327	5.88074	-19.2247	1.16213e-73	7.17929e-72	156.879	protein_coding		B3GALNT2	-0.271333	5.29366	-14.7653	4.11184e-46	2.52574e-44	93.9145	protein_coding		CNTN4	0.400279	4.31673	15.5964	7.19433e-51	4.30903e-49	104.751	protein_coding		ELN	-0.331084	6.26026	-10.8583	1.78232e-26	1.11059e-24	49.1592	protein_coding		ZWINT	0.653623	9.61834	19.4877	7.03438e-70	4.40862e-68	148.316	protein_coding		TPST1	-0.758305	6.13089	-20.9604	2.41344e-79
PREX1	-0.457676	6.5445	-19.2149	1.35113e-73	8.32311e-72	156.729	protein_coding		CPA3	1.2231	6.92199	14.7621	4.28949e-46	2.62741e-44	93.8725	protein_coding		TSPAN2	0.607999	4.58076	15.5844	8.44613e-51	5.04481e-49	104.591	protein_coding		GSE1	-0.298234	7.53902	-10.8578	1.79132e-26	1.11299e-24	49.1542	protein_coding		COPZ2	-0.455832	5.93766	-19.474	8.44629e-70	5.2782e-68	148.134	protein_coding		MS4A4A	-0.991142	5.95645	-20.9486	2.84627e-79
MAP7D1	-0.496705	7.54303	-19.2017	1.65611e-73	1.01729e-71	156.526	protein_coding		RASAL3	0.45612	6.72541	14.7594	4.43975e-46	2.71176e-44	93.8384	protein_coding		IGFBP3	0.853529	9.13804	15.5512	1.3197e-50	7.86077e-49	104.148	protein_coding		KIF7	-0.249222	6.01976	-10.8484	1.97079e-26	1.21403e-24	49.0599	protein_coding		EFEMP1	-1.06118	5.86293	-19.4621	9.90885e-70	6.17433e-68	147.975	protein_coding		ADAMTS1	-1.13548	6.10297	-20.921	4.18476e-79
CXCL12	-1.00236	6.87536	-19.1792	2.3434e-73	1.43538e-71	156.181	protein_coding		LTV1	-0.380235	6.44748	-14.7532	4.81238e-46	2.93108e-44	93.7584	protein_coding		ARL4C	0.640966	6.86619	15.5384	1.56704e-50	9.30838e-49	103.977	protein_coding		KYNU	0.418374	5.36023	10.8278	2.42637e-26	1.49042e-24	48.8544	protein_coding		GLT8D2	-1.1083	6.44392	-19.4355	1.41375e-69	8.78392e-68	147.621	protein_coding		NOTCH3	-0.501794	6.31642	-20.9112	4.79733e-79
NAPSB	-0.497526	4.71378	-19.1696	2.7157e-73	1.65872e-71	156.034	transcribed_unprocessed_pseudogene		CDC45	-0.547603	7.01206	-14.7451	5.34235e-46	3.24473e-44	93.6548	protein_coding		CRISPLD2	0.438691	6.79139	15.5314	1.72047e-50	1.01918e-48	103.885	protein_coding		ISG20	0.546283	7.90857	10.8226	2.55735e-26	1.56643e-24	48.8025	protein_coding		NEK2	0.872708	7.1068	19.4348	1.42665e-69	8.83869e-68	147.612	protein_coding		PHLDB2	-0.447074	4.20629	-20.9014	5.49993e-79
BTN3A3	-0.809553	6.55892	-19.1665	2.84665e-73	1.73381e-71	155.987	protein_coding		ICE2	-0.381278	5.57829	-14.7379	5.85608e-46	3.54678e-44	93.5637	protein_coding		PRELP	0.553596	6.21425	15.5194	2.02132e-50	1.19412e-48	103.724	protein_coding		DDX58	0.409399	6.73129	10.8203	2.61701e-26	1.59844e-24	48.7797	protein_coding		PRDM1	-0.652438	7.14104	-19.4137	1.89212e-69	1.1689e-67	147.331	protein_coding		FN1	-1.28314	8.72146	-20.8985	5.72686e-79
FBLN1	-0.64573	6.46809	-19.1498	3.68124e-73	2.23584e-71	155.731	protein_coding		GIMAP4	0.687396	7.04306	14.737	5.92917e-46	3.58102e-44	93.5514	protein_coding		ZNF542P	0.38204	3.96612	15.5134	2.18828e-50	1.28924e-48	103.646	transcribed_unprocessed_pseudogene		EPDR1	-0.898323	8.25239	-10.8007	3.19077e-26	1.9434e-24	48.5838	protein_coding		ORC1	0.733389	5.4545	19.4105	1.97389e-69	1.21594e-67	147.289	protein_coding		CYYR1	-0.785269	5.48301	-20.8883	6.60932e-79
LHFPL2	-0.431661	8.14804	-19.123	5.55369e-73	3.36364e-71	155.321	protein_coding		LYAR	-0.447522	7.82889	-14.7282	6.63765e-46	3.99775e-44	93.4394	protein_coding		CYP1B1	0.936415	4.93131	15.4949	2.8025e-50	1.64662e-48	103.4	protein_coding		COQ3	0.318661	7.69952	10.7814	3.87489e-26	2.35345e-24	48.3919	protein_coding		ARHGDIB	-0.755523	8.37944	-19.404	2.15245e-69	1.32217e-67	147.203	protein_coding		MYO5A	-0.478541	4.5895	-20.8829	7.12458e-79
COL15A1	-1.12843	8.98987	-19.0818	1.04548e-72	6.31434e-71	154.691	protein_coding		PLAC9	0.281872	5.64521	14.7237	7.03945e-46	4.22797e-44	93.3811	protein_coding		MOXD1	0.5032	5.16652	15.4915	2.93252e-50	1.71834e-48	103.355	protein_coding		ST8SIA4	0.34507	4.21655	10.7698	4.3588e-26	2.63745e-24	48.2756	protein_coding		FBXO5	0.715973	6.95392	19.4026	2.19433e-69	1.34407e-67	147.183	protein_coding		TMEM119	-0.959186	5.7473	-20.872	8.29128e-79
SPOCK1	-1.35012	6.73948	-19.0736	1.18619e-72	7.14422e-71	154.566	protein_coding		POLR1B	-0.284708	7.18223	-14.706	8.84051e-46	5.295e-44	93.155	protein_coding		MACF1	0.29968	7.28945	15.4486	5.20776e-50	3.0433e-48	102.784	protein_coding		DSTN	-0.260222	9.33666	-10.7696	4.36687e-26	2.63745e-24	48.2738	protein_coding		SIGLEC10	-0.57118	5.57467	-19.3711	3.34367e-69	2.03754e-67	146.764	protein_coding		TGFB1	-0.579963	6.21985	-20.87	8.52683e-79
GPR34	-0.967668	5.83549	-19.0677	1.2985e-72	7.79892e-71	154.476	protein_coding		HCLS1	0.894962	7.31942	14.6997	9.58373e-46	5.72429e-44	93.0749	protein_coding		MYCT1	0.29425	4.60147	15.4463	5.36433e-50	3.12635e-48	102.755	protein_coding		DOCK2	0.271355	4.77059	10.7629	4.67074e-26	2.81311e-24	48.2074	protein_coding		DTYMK	0.333946	5.99086	19.371	3.34533e-69	2.03754e-67	146.763	protein_coding		TNFSF13B	-1.04379	6.61969	-20.862	9.53792e-79
SAMD9L	-0.763873	5.90924	-19.0656	1.34022e-72	8.02723e-71	154.444	protein_coding		CEP152	-0.289879	4.95958	-14.6943	1.02804e-45	6.12352e-44	93.0053	protein_coding		ITGB5	0.346853	6.97977	15.4423	5.65974e-50	3.28965e-48	102.702	protein_coding		IFI6	0.889897	8.3031	10.7592	4.84748e-26	2.91145e-24	48.1707	protein_coding		PNRC1	-0.528162	9.65382	-19.3668	3.5379e-69	2.14878e-67	146.708	protein_coding		LAMC1	-0.610423	9.01371	-20.8339	1.41182e-78
MDFIC	-0.540441	5.20207	-19.0578	1.51129e-72	9.02684e-71	154.324	protein_coding		POLD4	0.372468	8.36643	14.6848	1.16133e-45	6.89844e-44	92.8843	protein_coding		PBX3	0.645061	7.38657	15.4399	5.84782e-50	3.38986e-48	102.669	protein_coding		ARHGAP19	0.198268	5.74527	10.7442	5.63694e-26	3.37623e-24	48.0216	protein_coding		MAN2B1	-0.564841	7.79701	-19.3572	4.02438e-69	2.4374e-67	146.579	protein_coding		MMRN2	-0.538944	4.66184	-20.8046	2.12294e-78
FERMT2	-0.937074	6.55497	-19.057	1.52986e-72	9.11257e-71	154.312	protein_coding		RASGRP2	0.200614	5.07894	14.6681	1.43964e-45	8.50491e-44	92.6712	protein_coding		CYBRD1	0.906062	7.00394	15.4206	7.56117e-50	4.37133e-48	102.414	protein_coding		HLA-DPB2	0.216246	3.53084	10.734	6.24479e-26	3.72997e-24	47.9204	transcribed_unprocessed_pseudogene		ACTA2	-0.647255	7.50594	-19.3547	4.1581e-69	2.51135e-67	146.547	protein_coding		EHD2	-0.553155	7.17267	-20.7866	2.72912e-78
MAN2B1	-0.423377	7.8627	-19.0555	1.56564e-72	9.30005e-71	154.289	protein_coding		MCM2	-0.526636	8.98742	-14.6478	1.86797e-45	1.10052e-43	92.4128	protein_coding		FGF7	0.317215	3.52575	15.4051	9.29524e-50	5.35951e-48	102.209	protein_coding		FAXDC2	-0.317499	7.34733	-10.7238	6.91546e-26	4.11918e-24	47.8197	protein_coding		RMI1	0.720604	7.8802	19.3279	5.95011e-69	3.58366e-67	146.19	protein_coding		GLIPR2	-0.866868	6.51042	-20.7454	4.8493e-78
APOC1	-0.871934	8.2127	-19.047	1.7844e-72	1.05705e-70	154.159	protein_coding		SLA	0.597151	7.14456	14.644	1.96114e-45	1.15227e-43	92.3645	protein_coding		DKK2	0.484516	3.88223	15.403	9.56663e-50	5.50132e-48	102.18	protein_coding		DST	-0.224748	5.53684	-10.7228	6.98719e-26	4.15047e-24	47.8095	protein_coding		CD72	-0.576223	5.16106	-19.3236	6.29972e-69	3.78368e-67	146.133	protein_coding		A2M	-0.566742	7.44978	-20.7359	5.53042e-78
SNAI2	-1.04302	6.93073	-19.0285	2.36618e-72	1.39786e-70	153.878	protein_coding		MFAP4	0.803119	6.55915	14.6432	1.98178e-45	1.16125e-43	92.3541	protein_coding		SRPX	1.12015	6.56691	15.3632	1.62335e-49	9.31036e-48	101.655	protein_coding		RBM6	-0.461831	6.64408	-10.7188	7.27282e-26	4.3083e-24	47.7699	protein_coding		ACP2	-0.495572	8.04633	-19.2995	8.68946e-69	5.20453e-67	145.813	protein_coding		CHSY3	-0.669945	4.86055	-20.7273	6.23393e-78
ISLR	-1.09056	6.92125	-19.0222	2.60666e-72	1.53573e-70	153.782	protein_coding		PTAFR	0.377737	6.70427	14.6423	2.0058e-45	1.17215e-43	92.3422	protein_coding		CAV1	0.837508	8.49666	15.3565	1.77415e-49	1.01483e-47	101.567	protein_coding		STK17B	0.319542	5.73236	10.7106	7.89477e-26	4.66395e-24	47.6888	protein_coding		IGF1	-0.77679	5.20626	-19.2809	1.11349e-68	6.6508e-67	145.566	protein_coding		EGR2	-1.04996	6.37256	-20.7216	6.7546e-78
VCAN	-1.15797	8.55644	-19.0117	3.06378e-72	1.80014e-70	153.621	protein_coding		VPREB3	0.419625	5.00816	14.6246	2.51748e-45	1.46719e-43	92.1167	protein_coding		HTRA3	0.388592	6.34306	15.3197	2.89557e-49	1.65193e-47	101.08	protein_coding		SLA	0.454532	7.14456	10.7042	8.4195e-26	4.96039e-24	47.6253	protein_coding		PAICS	0.490965	7.80827	19.2613	1.44545e-68	8.60978e-67	145.306	protein_coding		UNC5B	-0.557067	6.92796	-20.7126	7.65068e-78
PIK3CD	-0.361099	5.97679	-19.0112	3.08451e-72	1.80741e-70	153.614	protein_coding		BRIX1	-0.390436	7.40734	-14.6238	2.54392e-45	1.47862e-43	92.1064	protein_coding		HTR2B	0.854972	4.10104	15.3141	3.11769e-49	1.77397e-47	101.006	protein_coding		CCNA2	0.497536	7.73457	10.7028	8.53415e-26	5.01427e-24	47.6119	protein_coding		COX7A1	-0.916404	6.83524	-19.2586	1.49889e-68	8.9036e-67	145.27	protein_coding		RBMS1	-1.17318	7.77267	-20.6826	1.16159e-77
SIGLEC1	-0.45416	5.75121	-19.0098	3.15045e-72	1.84106e-70	153.593	protein_coding		PRKCB	0.299308	4.75876	14.6226	2.58336e-45	1.49752e-43	92.0911	protein_coding		SHISA2	1.02288	5.56611	15.311	3.24789e-49	1.8432e-47	100.966	protein_coding		NFATC4	-0.15721	5.54076	-10.699	8.86589e-26	5.19507e-24	47.5742	protein_coding		FBXL7	-0.600715	5.84636	-19.2557	1.55742e-68	9.2259e-67	145.232	protein_coding		SGIP1	-0.620506	4.42261	-20.6772	1.2528e-77
RASGRP1	-0.844326	5.38295	-18.9793	5.02208e-72	2.92689e-70	153.129	protein_coding		NOM1	-0.396405	6.95313	-14.6152	2.83944e-45	1.64156e-43	91.9973	protein_coding		OLFML2A	0.606079	7.14572	15.2887	4.36363e-49	2.46346e-47	100.672	protein_coding		CLEC12A	0.11075	3.74208	10.6958	9.16093e-26	5.35345e-24	47.5419	protein_coding		MMP19	-0.464281	6.38401	-19.2463	1.76546e-68	1.04297e-66	145.107	protein_coding		TIE1	-0.455302	4.32556	-20.6202	2.7673e-77
IGFBP5	-0.580612	6.37611	-18.9698	5.80965e-72	3.37678e-70	152.983	protein_coding		MTF2	-0.375	7.09067	-14.6114	2.98067e-45	1.71861e-43	91.9492	protein_coding		GALNT15	0.365541	4.33776	15.2853	4.56656e-49	2.5713e-47	100.627	protein_coding		MCM6	0.264593	7.0167	10.6946	9.27094e-26	5.40314e-24	47.5301	protein_coding		TNS1	-0.726691	6.4722	-19.2366	2.00893e-68	1.18357e-66	144.978	protein_coding		LSP1	-0.628646	6.78326	-20.6062	3.36203e-77
BCL2A1	-1.30196	6.39129	-18.9357	9.78131e-72	5.67001e-70	152.465	protein_coding		CCDC150	-0.286417	4.45449	-14.5846	4.20312e-45	2.41702e-43	91.6082	protein_coding		CMTM3	0.40408	6.4601	15.2736	5.32907e-49	2.99286e-47	100.474	protein_coding		PTPRCAP	0.354257	6.64651	10.6856	1.01387e-25	5.89296e-24	47.4417	protein_coding		LHFPL2	-0.548448	8.07099	-19.2348	2.05801e-68	1.20919e-66	144.954	protein_coding		CRISPLD1	-1.21972	4.54734	-20.6059	3.37877e-77
CD3E	-0.543259	6.12509	-18.9317	1.04023e-71	6.01384e-70	152.403	protein_coding		UBR3	-0.238748	5.9829	-14.5792	4.50101e-45	2.58145e-43	91.5403	protein_coding		FHL1	0.932962	6.80524	15.2706	5.55048e-49	3.10913e-47	100.433	protein_coding		IL26	0.208371	3.14224	10.6818	1.0536e-25	6.10747e-24	47.4037	protein_coding		GRN	-0.592975	9.69197	-19.2338	2.08449e-68	1.22143e-66	144.941	protein_coding		SYNDIG1	-0.6513	5.15994	-20.5976	3.79187e-77
OSMR	-0.643611	5.5387	-18.9029	1.61296e-71	9.3001e-70	151.967	protein_coding		SNRNP48	-0.466573	6.55603	-14.5549	6.14052e-45	3.51244e-43	91.2321	protein_coding		CCDC50	0.434561	6.66431	15.2649	5.98494e-49	3.34384e-47	100.359	protein_coding		IRF2BP2	-0.230412	9.00238	-10.6732	1.14793e-25	6.61882e-24	47.319	protein_coding		WBP1L	-0.492708	8.32658	-19.2185	2.55783e-68	1.49474e-66	144.738	protein_coding		PDPN	-0.636582	5.58327	-20.5708	5.49711e-77
CD180	-0.346554	5.82521	-18.876	2.43089e-71	1.39789e-69	151.558	protein_coding		ATAD5	-0.320884	5.70134	-14.5345	7.97013e-45	4.54697e-43	90.9734	protein_coding		ZFHX4	0.242922	4.36712	15.264	6.05298e-49	3.37313e-47	100.347	protein_coding		MICAL2	-0.25718	7.45337	-10.6696	1.19052e-25	6.84613e-24	47.2831	protein_coding		E2F8	0.939778	7.08365	19.1942	3.53325e-68	2.05919e-66	144.416	protein_coding		OLR1	-1.21285	4.44893	-20.5561	6.74909e-77
PRDM1	-0.475446	7.20814	-18.8674	2.77129e-71	1.58941e-69	151.428	protein_coding		ZNF280C	-0.543502	4.65909	-14.5308	8.3637e-45	4.75894e-43	90.9256	protein_coding		SUGCT	0.619526	5.76519	15.256	6.73258e-49	3.74221e-47	100.242	protein_coding		VGLL4	-0.270825	8.6814	-10.6657	1.23749e-25	7.09737e-24	47.2448	protein_coding		PUS7	0.782304	8.82704	19.1868	3.89844e-68	2.26592e-66	144.318	protein_coding		COL14A1	-0.600707	4.99932	-20.543	8.09482e-77
CYBRD1	-0.954343	7.00394	-18.8492	3.65817e-71	2.09251e-69	151.151	protein_coding		NDUFAF7	-0.354349	6.08496	-14.5234	9.18908e-45	5.21486e-43	90.8322	protein_coding		CYYR1	0.553487	5.53113	15.2202	1.0803e-48	5.98931e-47	99.772	protein_coding		WDR76	0.369135	4.59378	10.6609	1.29759e-25	7.42234e-24	47.198	protein_coding		CPNE5	-0.709951	5.67747	-19.185	3.99419e-68	2.31535e-66	144.294	protein_coding		HTRA3	-0.513403	6.33195	-20.5421	8.18856e-77
FSTL1	-0.664962	7.63301	-18.8351	4.5346e-71	2.58019e-69	150.937	protein_coding		NFXL1	-0.493316	7.44711	-14.5226	9.27904e-45	5.25213e-43	90.8225	protein_coding		SERPING1	1.03541	8.10414	15.1884	1.64281e-48	9.06144e-47	99.3556	protein_coding		EP300-AS1	0.622362	4.19522	10.6549	1.3777e-25	7.8598e-24	47.1388	lncRNA		DOK3	-0.468198	5.29258	-19.1825	4.1307e-68	2.38807e-66	144.26	protein_coding		C1QC	-1.15317	8.1798	-20.51	1.27938e-76
FEZ1	-0.399109	5.69306	-18.8305	4.86002e-71	2.75809e-69	150.868	protein_coding		AMPD1	0.386188	4.36913	14.5215	9.41447e-45	5.31488e-43	90.8082	protein_coding		NID1	0.463142	6.81401	15.1858	1.70025e-48	9.35442e-47	99.3215	protein_coding		KLF7	-0.333252	5.98106	-10.6526	1.40967e-25	8.02101e-24	47.1162	protein_coding		NCAPH	0.706343	6.9961	19.1769	4.44875e-68	2.56509e-66	144.186	protein_coding		DENND5A	-0.821317	7.49777	-20.5096	1.286e-76
PILRA	-0.452215	5.25421	-18.8277	5.07092e-71	2.87025e-69	150.826	protein_coding		POU2F2	0.202787	5.52059	14.5054	1.15589e-44	6.50853e-43	90.6046	protein_coding		TTC28	0.382011	5.10374	15.1822	1.78347e-48	9.78733e-47	99.274	protein_coding		KLRB1	0.593349	6.2846	10.6502	1.4441e-25	8.19535e-24	47.0923	protein_coding		DPEP2	-0.48511	4.87819	-19.1684	4.98377e-68	2.86593e-66	144.073	protein_coding		TCEAL3	-0.891554	7.72222	-20.5014	1.44042e-76
CORO1A	-0.694113	7.62395	-18.811	6.54578e-71	3.68575e-69	150.572	protein_coding		APBB1IP	0.287533	5.28941	14.4923	1.36553e-44	7.66896e-43	90.4392	protein_coding		EMCN	0.56098	5.55475	15.1768	1.91578e-48	1.04868e-46	99.2029	protein_coding		ARHGAP11A	0.436434	4.66667	10.6383	1.62685e-25	9.20833e-24	46.9746	protein_coding		TRIP13	0.88187	8.18513	19.15	6.3656e-68	3.65085e-66	143.83	protein_coding		LIX1L	-0.544845	5.82089	-20.474	2.109e-76
TMEM45A	-1.15087	6.80139	-18.8088	6.76041e-71	3.79672e-69	150.54	protein_coding		NUDCD1	-0.526968	6.71797	-14.4859	1.48183e-44	8.30057e-43	90.3581	protein_coding		UBE2QL1	0.443748	4.3404	15.1526	2.63214e-48	1.43717e-46	98.8873	protein_coding		TMCC1	-0.195625	6.35711	-10.6303	1.76088e-25	9.94095e-24	46.8964	protein_coding		PPM1M	-0.50552	6.11448	-19.1082	1.10915e-67	6.34443e-66	143.277	protein_coding		ATP2B4	-0.695382	6.64526	-20.4738	2.11277e-76
TNS1	-0.616431	6.60299	-18.8085	6.79148e-71	3.80428e-69	150.535	protein_coding		LINC01140	0.25068	4.6682	14.4767	1.66564e-44	9.30605e-43	90.2421	lncRNA		PDGFRL	0.80534	5.63084	15.1352	3.31193e-48	1.80379e-46	98.6591	protein_coding		MUC20	-0.587934	7.18055	-10.6175	2.00094e-25	1.12667e-23	46.7702	protein_coding		DCLRE1A	0.560847	6.61423	19.1055	1.15008e-67	6.56125e-66	143.241	protein_coding		WBP1L	-0.501762	8.34736	-20.4579	2.63372e-76
UBE2E2	-0.917541	6.69634	-18.8061	7.05319e-71	3.94067e-69	150.497	protein_coding		MKI67	-0.541208	7.79824	-14.4764	1.67348e-44	9.32576e-43	90.2375	protein_coding		ATP8B2	0.452322	6.19273	15.1274	3.67128e-48	1.99448e-46	98.5568	protein_coding		HCLS1	0.673207	7.31942	10.6065	2.23249e-25	1.25379e-23	46.662	protein_coding		SLC31A2	-0.808334	6.58928	-19.0953	1.31569e-67	7.48629e-66	143.107	protein_coding		TNC	-1.13336	5.45263	-20.4266	4.06823e-76
MFAP4	-0.836757	6.55915	-18.7748	1.13332e-70	6.29941e-69	150.025	protein_coding		PNPT1	-0.443303	9.16327	-14.4414	2.61164e-44	1.45164e-42	89.7959	protein_coding		CDK14	0.276247	5.55404	15.1241	3.83136e-48	2.07623e-46	98.5144	protein_coding		FANCG	0.312969	7.36584	10.6007	2.36365e-25	1.32401e-23	46.6057	protein_coding		IGFBP6	-0.949276	6.7855	-19.0867	1.47472e-67	8.36911e-66	142.993	protein_coding		C1QA	-1.07677	7.71353	-20.4011	5.78957e-76
CD27	-0.688223	6.40978	-18.7679	1.26016e-70	6.98646e-69	149.92	protein_coding		STAT4	0.461641	5.74089	14.4362	2.78897e-44	1.54623e-42	89.7308	protein_coding		MAP4K4	0.428739	6.35086	15.1061	4.85139e-48	2.62242e-46	98.28	protein_coding		OIP5	0.548269	7.1617	10.5992	2.39887e-25	1.34027e-23	46.591	protein_coding		RAMP3	-0.579627	6.76504	-19.085	1.50868e-67	8.53943e-66	142.97	protein_coding		ZNF677	-0.346181	3.68179	-20.3971	6.12078e-76
GLI3	-0.348157	5.37419	-18.7468	1.73405e-70	9.58916e-69	149.602	protein_coding		MZT1	-0.4531	6.56004	-14.4298	3.02458e-44	1.67257e-42	89.6503	protein_coding		NRP1	0.370137	5.01847	15.0978	5.41393e-48	2.9192e-46	98.171	protein_coding		IL7	0.645762	5.65532	10.5957	2.48529e-25	1.38497e-23	46.5561	protein_coding		CCNA2	0.862499	7.72169	19.0845	1.51964e-67	8.57904e-66	142.963	protein_coding		MDFIC	-0.697191	5.13372	-20.3364	1.41868e-75
CTSD	-0.525413	8.31299	-18.7347	2.08548e-70	1.15031e-68	149.418	protein_coding		RAN	-0.325079	10.7253	-14.429	3.0557e-44	1.68547e-42	89.6402	protein_coding		MMP11	0.608443	7.14945	15.0949	5.62583e-48	3.02591e-46	98.1329	protein_coding		CGN	-0.442579	7.72361	-10.5834	2.80829e-25	1.56095e-23	46.4354	protein_coding		IL21R	-0.411851	4.4327	-19.078	1.65689e-67	9.32952e-66	142.877	protein_coding		ERG	-0.385501	4.57494	-20.3164	1.8687e-75
P2RY8	-0.509663	5.67346	-18.7291	2.27035e-70	1.2491e-68	149.333	protein_coding		STAB1	0.262133	5.74463	14.4154	3.62987e-44	1.99708e-42	89.4694	protein_coding		GNB4	0.478952	6.0037	15.0722	7.57912e-48	4.0664e-46	97.8368	protein_coding		ZCCHC24	-0.634995	7.60498	-10.5822	2.84044e-25	1.57477e-23	46.4242	protein_coding		PIK3CG	-0.488079	4.25345	-19.0731	1.76841e-67	9.93155e-66	142.812	protein_coding		CD59	-0.555545	8.84389	-20.2984	2.39834e-75
PMP22	-0.335071	5.48671	-18.6966	3.71284e-70	2.03754e-68	148.844	protein_coding		P2RY8	0.483229	5.67346	14.4074	4.01794e-44	2.20497e-42	89.3686	protein_coding		AXL	0.504371	6.85506	15.0625	8.60404e-48	4.60487e-46	97.7108	protein_coding		ANKH	-0.272368	6.23623	-10.5766	3.00226e-25	1.66022e-23	46.3694	protein_coding		FBXO45	0.575427	6.63614	19.0478	2.47144e-67	1.38081e-65	142.479	protein_coding		ITGA11	-0.40073	5.46769	-20.2889	2.73363e-75
TNFAIP8L2	-0.341091	5.42857	-18.6961	3.74262e-70	2.04868e-68	148.836	protein_coding		CD101	0.217797	5.02334	14.3979	4.53244e-44	2.47476e-42	89.2491	protein_coding		PDLIM4	0.310814	5.60143	15.0622	8.63909e-48	4.61221e-46	97.7068	protein_coding		ARMCX4	-0.179964	4.53124	-10.5674	3.28996e-25	1.81468e-23	46.2791	protein_coding		AURKA	0.640387	7.40862	19.0283	3.20204e-67	1.7844e-65	142.221	protein_coding		PARVA	-0.456869	6.93645	-20.2753	3.30203e-75
TLR2	-0.65171	6.99416	-18.6725	5.35354e-70	2.92309e-68	148.479	protein_coding		HAUS2	-0.284321	6.56496	-14.3925	4.85902e-44	2.64639e-42	89.18	protein_coding		CDH2	0.335771	4.89784	15.0572	9.22014e-48	4.91029e-46	97.6422	protein_coding		SORL1	-0.414989	8.47141	-10.5565	3.66601e-25	2.01696e-23	46.1722	protein_coding		APOE	-1.18268	7.6261	-19.0238	3.39913e-67	1.88936e-65	142.161	protein_coding		SERPINH1	-0.792538	9.42239	-20.242	5.22975e-75
MSRB3	-0.665695	6.2673	-18.6459	7.99931e-70	4.3567e-68	148.079	protein_coding		PNOC	0.405205	4.90993	14.3914	4.92742e-44	2.6769e-42	89.1662	protein_coding		ADAMTS3	0.272472	3.62002	15.0551	9.47785e-48	5.03513e-46	97.6148	protein_coding		AK2	0.220829	7.58224	10.5535	3.77549e-25	2.07192e-23	46.1431	protein_coding		PPAT	0.732006	7.49919	19.0233	3.42408e-67	1.89834e-65	142.154	protein_coding		RASL12	-0.694949	6.09735	-20.2405	5.33833e-75
MFAP5	-1.22518	5.36304	-18.643	8.36574e-70	4.54482e-68	148.035	protein_coding		CCL13	0.405831	5.53684	14.3838	5.42099e-44	2.93701e-42	89.0715	protein_coding		THBS1	0.538938	6.3496	15.0504	1.00811e-47	5.34247e-46	97.5535	protein_coding		GRIN3A	0.11335	3.9729	10.5503	3.89777e-25	2.13361e-23	46.1116	protein_coding		KLHDC8B	-0.587113	6.74411	-19.0087	4.1517e-67	2.29586e-65	141.962	protein_coding		SPHK1	-0.778905	6.27235	-20.1802	1.22783e-74
TUBA1A	-0.766259	10.3329	-18.6087	1.40394e-69	7.58486e-68	147.519	protein_coding		CPSF6	-0.325069	7.75549	-14.3731	6.21057e-44	3.34875e-42	88.9366	protein_coding		SEC31A	0.379151	9.73496	15.0476	1.0454e-47	5.52658e-46	97.5174	protein_coding		SLC25A28	0.156083	6.55585	10.5468	4.0337e-25	2.20244e-23	46.0778	protein_coding		AMOTL1	-0.363535	5.45798	-18.9961	4.90649e-67	2.70633e-65	141.796	protein_coding		DACT1	-1.30575	6.32576	-20.1607	1.60632e-74
ANTXR1	-0.378892	6.12201	-18.6086	1.40668e-69	7.58486e-68	147.517	protein_coding		USP31	-0.322687	5.76649	-14.3708	6.39507e-44	3.43966e-42	88.9076	protein_coding		ACTC1	0.517527	6.71309	15.045	1.08216e-47	5.70695e-46	97.4831	protein_coding		JUN	-0.383666	8.68507	-10.5449	4.11013e-25	2.23852e-23	46.0592	protein_coding		P2RY10	-0.38827	4.25563	-18.983	5.84249e-67	3.21441e-65	141.622	protein_coding		EVI2A	-1.06102	6.00628	-20.1424	2.06635e-74
EGR2	-0.821698	6.48052	-18.6065	1.4519e-69	7.80919e-68	147.486	protein_coding		SSB	-0.38095	9.31916	-14.3663	6.76395e-44	3.62903e-42	88.8519	protein_coding		MMP14	0.471319	7.45068	15.0103	1.7036e-47	8.96236e-46	97.0324	protein_coding		POLR3G	0.240122	4.11901	10.5363	4.47531e-25	2.43128e-23	45.9752	protein_coding		C14orf132	-0.565402	5.37872	-18.9812	5.97656e-67	3.27983e-65	141.599	protein_coding		GIMAP4	-0.730972	6.72115	-20.1221	2.73481e-74
MXRA5	-1.08633	9.15877	-18.5842	2.03199e-69	1.09021e-67	147.151	protein_coding		CFP	0.305749	4.69634	14.3621	7.1349e-44	3.81859e-42	88.799	protein_coding		MEOX2	0.36538	3.20877	15.0064	1.79274e-47	9.40839e-46	96.9817	protein_coding		LPP	-0.245459	7.32134	-10.5318	4.6793e-25	2.53574e-23	45.9312	protein_coding		ITK	-0.792462	5.30685	-18.9757	6.43547e-67	3.52273e-65	141.526	protein_coding		MNDA	-1.25578	5.81726	-20.1128	3.10797e-74
HTRA1	-0.940525	8.58186	-18.5644	2.74033e-69	1.46662e-67	146.853	protein_coding		NEK4	-0.279337	6.13463	-14.3579	7.53113e-44	4.0207e-42	88.7453	protein_coding		THBS3	0.436468	6.82059	14.9998	1.95323e-47	1.02258e-45	96.8965	protein_coding		RNF19B	0.444241	7.92177	10.5298	4.77228e-25	2.57966e-23	45.9117	protein_coding		HVCN1	-0.47137	6.93313	-18.9713	6.82178e-67	3.72476e-65	141.468	protein_coding		CD53	-0.425371	5.6177	-20.1075	3.3431e-74
STX11	-0.339785	4.443	-18.5471	3.55836e-69	1.89972e-67	146.593	protein_coding		RILP	0.358885	7.50174	14.3565	7.65833e-44	4.07853e-42	88.7287	protein_coding		NR3C1	0.719518	6.50334	14.9964	2.04181e-47	1.06638e-45	96.8525	protein_coding		NSD1	0.166262	5.41997	10.5252	4.9915e-25	2.69143e-23	45.8674	protein_coding		CEP55	0.985793	8.11166	18.9695	6.98278e-67	3.80307e-65	141.444	protein_coding		ECSCR	-0.549045	6.14402	-20.0863	4.47787e-74
P2RX7	-0.453973	4.76785	-18.5432	3.77323e-69	2.00948e-67	146.535	protein_coding		SPIB	0.340878	4.91995	14.3523	8.08398e-44	4.29366e-42	88.6751	protein_coding		PTGER3	0.181557	4.21285	14.989	2.25022e-47	1.17239e-45	96.7559	protein_coding		CBR3	0.482287	7.01737	10.5238	5.06206e-25	2.72269e-23	45.8535	protein_coding		ANGPTL2	-0.856339	6.51234	-18.9675	7.16588e-67	3.89298e-65	141.419	protein_coding		GIMAP6	-0.862857	5.57487	-20.0822	4.73807e-74
GZMA	-1.16138	6.28968	-18.5408	3.91042e-69	2.07742e-67	146.499	protein_coding		GMFG	0.609688	7.11685	14.3521	8.102e-44	4.29366e-42	88.6729	protein_coding		IGFBP6	0.718722	6.93027	14.9394	4.29696e-47	2.23338e-45	96.1135	protein_coding		RNF213	0.30995	6.5332	10.521	5.20361e-25	2.79187e-23	45.8263	protein_coding		CCR1	-0.816793	6.18797	-18.9619	7.72216e-67	4.18468e-65	141.344	protein_coding		CDH5	-0.887783	6.26148	-20.0559	6.80984e-74
RAD18	0.365256	5.43009	18.5079	6.42322e-69	3.40399e-67	146.005	protein_coding		IL7R	0.758958	7.45001	14.3454	8.81205e-44	4.65854e-42	88.5895	protein_coding		ADAMTS2	0.561944	6.52092	14.9336	4.63653e-47	2.4041e-45	96.0379	protein_coding		TAPBP	0.255441	7.6828	10.5119	5.69322e-25	3.047e-23	45.7375	protein_coding		PBXIP1	-0.495384	7.22182	-18.9536	8.62426e-67	4.66184e-65	141.234	protein_coding		PSAP	-0.478282	10.9501	-20.0294	9.80849e-74
COL3A1	-0.977982	10.5382	-18.502	7.02124e-69	3.71181e-67	145.916	protein_coding		DSN1	-0.545628	6.76999	-14.3417	9.23473e-44	4.87008e-42	88.5431	protein_coding		CFL2	0.779938	5.82991	14.9188	5.62035e-47	2.90725e-45	95.8468	protein_coding		SPC25	0.555653	6.39044	10.5069	5.9806e-25	3.1929e-23	45.6888	protein_coding		CXCL13	-2.05047	5.78397	-18.9514	8.87576e-67	4.78583e-65	141.206	protein_coding		JAZF1	-0.831393	5.34803	-20.0213	1.09636e-73
IGLL3P	-1.13133	9.0136	-18.4974	7.51919e-69	3.96536e-67	145.848	unprocessed_pseudogene		PIP4K2A	0.321375	6.77281	14.3396	9.48739e-44	4.99115e-42	88.5163	protein_coding		ROR2	0.60909	4.59582	14.9159	5.83428e-47	3.01071e-45	95.8097	protein_coding		CLEC4A	0.487473	5.59892	10.5016	6.30327e-25	3.35688e-23	45.637	protein_coding		MRC1	-1.51125	6.79849	-18.9451	9.65326e-67	5.19211e-65	141.122	protein_coding		SH3BP5	-0.779565	7.63748	-20.0205	1.10768e-73
LDB2	-0.357588	5.02543	-18.4868	8.82618e-69	4.6433e-67	145.689	protein_coding		TMEM68	-0.525979	6.85795	-14.334	1.01857e-43	5.34554e-42	88.4458	protein_coding		SVIL	0.386328	6.75392	14.9037	6.84454e-47	3.52364e-45	95.6511	protein_coding		GVINP1	0.162893	4.2442	10.5006	6.36438e-25	3.37773e-23	45.6274	transcribed_unprocessed_pseudogene		LSM5	0.671304	7.83862	18.9398	1.03489e-66	5.55245e-65	141.053	protein_coding		MAGEH1	-0.894884	6.87845	-20.0073	1.32781e-73
ITGA4	-0.637008	5.07247	-18.4852	9.04071e-69	4.74462e-67	145.665	protein_coding		ERCC8	-0.243701	5.0464	-14.3317	1.04776e-43	5.48542e-42	88.4178	protein_coding		GULP1	0.552722	5.55751	14.8976	7.40064e-47	3.80087e-45	95.5735	protein_coding		GIMAP6	0.579474	5.9062	10.5005	6.37367e-25	3.37773e-23	45.626	protein_coding		TOP2A	0.745113	7.35792	18.9384	1.05371e-66	5.63942e-65	141.035	protein_coding		FPR3	-0.849364	6.04287	-19.9947	1.58045e-73
FCGR2C	-0.474336	6.45207	-18.4742	1.06647e-68	5.58336e-67	145.5	polymorphic_pseudogene		XPOT	-0.457211	9.06937	-14.3308	1.06019e-43	5.53705e-42	88.4061	protein_coding		AMIGO2	1.08345	8.20828	14.897	7.46178e-47	3.82319e-45	95.5653	protein_coding		INCENP	0.251666	5.42111	10.4967	6.61272e-25	3.49585e-23	45.5896	protein_coding		CTSL	-0.870057	8.72145	-18.9323	1.14344e-66	6.10456e-65	140.953	protein_coding		UBE2E2	-1.1975	6.58586	-19.9791	1.95732e-73
PPM1M	-0.396434	6.18457	-18.4631	1.2601e-68	6.58114e-67	145.334	protein_coding		DDX21	-0.414569	10.3684	-14.33	1.07108e-43	5.58048e-42	88.396	protein_coding		JAZF1	0.594784	5.39229	14.8746	9.98394e-47	5.10338e-45	95.2761	protein_coding		NCAPH	0.396701	6.9926	10.4934	6.83658e-25	3.60538e-23	45.5567	protein_coding		KIF18B	0.777518	7.58429	18.9142	1.45203e-66	7.73293e-65	140.715	protein_coding		SLC15A3	-0.620708	6.76413	-19.9659	2.34663e-73
IRF9	-0.588172	9.16763	-18.4616	1.28874e-68	6.7145e-67	145.312	protein_coding		UTP15	-0.439279	5.46653	-14.3262	1.1236e-43	5.84003e-42	88.3485	protein_coding		TUSC3	0.387093	4.70343	14.8714	1.04147e-46	5.31099e-45	95.2342	protein_coding		APBB1IP	0.21671	5.28941	10.4877	7.22857e-25	3.80283e-23	45.5017	protein_coding		LDOC1	-0.584333	6.00161	-18.9121	1.49335e-66	7.93346e-65	140.687	protein_coding		CCR1	-0.70765	6.1725	-19.9607	2.52003e-73
CDH11	-0.855553	6.80245	-18.4538	1.44991e-68	7.53603e-67	145.194	protein_coding		FEN1	-0.505354	8.5737	-14.3195	1.22286e-43	6.34069e-42	88.2645	protein_coding		MYH11	0.788065	6.42257	14.8705	1.05342e-46	5.35929e-45	95.2228	protein_coding		ENGASE	-0.381312	8.26011	-10.4667	8.88901e-25	4.665e-23	45.2975	protein_coding		HJURP	0.671459	7.55439	18.8893	2.01984e-66	1.07042e-64	140.387	protein_coding		SLC2A3	-1.20842	7.06566	-19.9574	2.63848e-73
IGFBP6	-0.764821	6.93027	-18.4535	1.45497e-68	7.54422e-67	145.191	protein_coding		EIF5B	-0.348985	6.87568	-14.3144	1.30364e-43	6.74336e-42	88.2011	protein_coding		COL16A1	0.744938	7.44302	14.8528	1.32505e-46	6.7254e-45	94.995	protein_coding		SHROOM4	-0.300338	5.75465	-10.466	8.94721e-25	4.68418e-23	45.2911	protein_coding		ANKRD35	-0.471979	5.31144	-18.8882	2.04895e-66	1.08319e-64	140.372	protein_coding		APOE	-1.12253	7.64306	-19.9448	3.1376e-73
PTGDS	-0.796424	7.88907	-18.4498	1.53881e-68	7.95986e-67	145.135	protein_coding		RASSF2	0.691494	6.4316	14.3105	1.36983e-43	7.06883e-42	88.1519	protein_coding		THBS4	0.865623	6.36019	14.8448	1.47014e-46	7.44435e-45	94.8918	protein_coding		PSRC1	0.412677	6.84328	10.4626	9.25079e-25	4.83141e-23	45.2581	protein_coding		SPC25	0.97659	6.35619	18.8851	2.13305e-66	1.1249e-64	140.332	protein_coding		HSD17B6	-1.19509	5.16888	-19.942	3.26052e-73
FBLN2	-0.727013	6.43148	-18.4495	1.54494e-68	7.97247e-67	145.131	protein_coding		SMC3	-0.439347	6.39055	-14.3065	1.44189e-43	7.42297e-42	88.1011	protein_coding		ADAMTS1	0.795141	6.1765	14.8436	1.49394e-46	7.5472e-45	94.8758	protein_coding		LILRB2	0.399684	5.18203	10.4621	9.29273e-25	4.84162e-23	45.2536	protein_coding		RFWD3	0.750853	6.97658	18.8816	2.2342e-66	1.17537e-64	140.286	protein_coding		HS3ST3A1	-0.8526	4.94591	-19.9066	5.3005e-73
TRANK1	-0.497493	6.50093	-18.4276	2.14729e-68	1.10545e-66	144.803	protein_coding		COPZ2	0.33608	5.95923	14.3023	1.51934e-43	7.80311e-42	88.0492	protein_coding		FBLN5	0.698141	6.78862	14.8337	1.6984e-46	8.56009e-45	94.7485	protein_coding		PIGT	-0.238218	8.3036	-10.4502	1.04451e-24	5.42894e-23	45.1382	protein_coding		WDR43	0.708361	7.98102	18.8768	2.38225e-66	1.25022e-64	140.222	protein_coding		FBXO32	-0.672031	5.29229	-19.9023	5.62712e-73
CCL21	-0.897875	6.6428	-18.4265	2.18473e-68	1.12205e-66	144.786	protein_coding		CCDC59	-0.363412	8.677	-14.2967	1.63088e-43	8.35615e-42	87.9789	protein_coding		CD59	0.399716	8.87173	14.8159	2.13838e-46	1.07276e-44	94.5197	protein_coding		PLK4	0.356447	5.3369	10.4499	1.04834e-24	5.4358e-23	45.1346	protein_coding		HIC1	-0.407934	5.07192	-18.8683	2.66641e-66	1.39596e-64	140.11	protein_coding		PCDH17	-0.8295	6.35772	-19.875	8.18294e-73
CD72	-0.454956	5.24294	-18.4134	2.65862e-68	1.36219e-66	144.591	protein_coding		PMS1	-0.189642	4.79871	-14.2958	1.64908e-43	8.4294e-42	87.9679	protein_coding		MYH10	0.621765	6.38615	14.8067	2.40747e-46	1.20496e-44	94.402	protein_coding		PHYH	-0.44912	9.14929	-10.4465	1.08331e-24	5.60365e-23	45.1022	protein_coding		ARHGAP11A	0.749593	4.62901	18.8595	2.99379e-66	1.5598e-64	139.995	protein_coding		CLEC11A	-0.608277	6.18793	-19.8713	8.61035e-73
CMKLR1	-0.25897	5.34292	-18.4071	2.92274e-68	1.49046e-66	144.496	protein_coding		CCSAP	-0.26286	4.79932	-14.281	1.98683e-43	1.01319e-41	87.7831	protein_coding		TNFSF4	0.803336	5.71228	14.7964	2.75207e-46	1.37425e-44	94.2691	protein_coding		ZMYND8	-0.339154	7.002	-10.438	1.17774e-24	6.07759e-23	45.0197	protein_coding		POLR1B	0.407298	7.21388	18.8576	3.06937e-66	1.59533e-64	139.97	protein_coding		NCKAP1L	-0.470441	5.82572	-19.8594	1.01355e-72
TYMP	-0.5955	6.32538	-18.3738	4.81209e-68	2.44816e-66	144	protein_coding		TAF5	-0.453361	6.50892	-14.2806	1.99795e-43	1.01646e-41	87.7775	protein_coding		ZNF25	0.424034	5.34637	14.7786	3.46479e-46	1.72617e-44	94.0404	protein_coding		ALYREF	0.504197	8.75196	10.4267	1.31565e-24	6.77311e-23	44.9103	protein_coding		ZEB2	-0.508111	4.2966	-18.8573	3.08416e-66	1.59918e-64	139.965	protein_coding		DOK5	-0.541582	5.31923	-19.8571	1.04532e-72
PRKCH	-0.264967	5.76424	-18.3586	6.04748e-68	3.06945e-66	143.772	protein_coding		FANCB	-0.190497	3.6732	-14.2738	2.17788e-43	1.1054e-41	87.692	protein_coding		ADAMTS6	0.243772	4.31447	14.7706	3.84205e-46	1.90972e-44	93.9377	protein_coding		DEPDC1B	0.523221	6.4426	10.4261	1.32412e-24	6.80048e-23	44.904	protein_coding		TIMELESS	0.397474	6.16813	18.8544	3.20166e-66	1.65613e-64	139.928	protein_coding		CLEC7A	-0.41191	4.46476	-19.8503	1.1482e-72
PRRX1	-0.904679	5.67568	-18.3289	9.43861e-68	4.76826e-66	143.329	protein_coding		ASAP3	0.359148	6.19642	14.2671	2.36904e-43	1.19961e-41	87.6085	protein_coding		RARRES2	0.819901	8.60673	14.7568	4.59128e-46	2.2769e-44	93.7608	protein_coding		NYNRIN	-0.42022	6.90999	-10.4215	1.38416e-24	7.09201e-23	44.8602	protein_coding		CEP78	0.547022	6.73128	18.8486	3.4568e-66	1.77959e-64	139.852	protein_coding		HLA-DPB1	-0.678688	6.80819	-19.8363	1.39145e-72
TNFAIP6	-1.19674	6.42853	-18.3271	9.68807e-68	4.88288e-66	143.303	protein_coding		ARHGEF6	0.597515	6.80478	14.2574	2.67508e-43	1.35141e-41	87.488	protein_coding		PPP1R14A	0.84646	5.70402	14.7337	6.1846e-46	3.06003e-44	93.465	protein_coding		C18orf25	0.184988	5.34057	10.4205	1.39791e-24	7.14555e-23	44.8504	protein_coding		MEF2C	-0.677546	5.91087	-18.8442	3.66552e-66	1.88256e-64	139.793	protein_coding		SRGN	-0.959774	7.57908	-19.8306	1.504e-72
F13A1	-1.08974	6.54431	-18.3152	1.15712e-67	5.81841e-66	143.126	protein_coding		PTGES3	-0.235349	12.0526	-14.2553	2.74721e-43	1.38462e-41	87.4616	protein_coding		RECK	0.211051	4.84772	14.7016	9.35098e-46	4.61614e-44	93.0544	protein_coding		COQ2	0.215422	6.12103	10.4198	1.40732e-24	7.17667e-23	44.8438	protein_coding		CLEC2B	-0.73904	5.61222	-18.8365	4.05984e-66	2.08014e-64	139.692	protein_coding		MLLT11	-0.95604	6.77505	-19.8175	1.7998e-72
HMOX1	-0.664288	7.55438	-18.313	1.19598e-67	5.99989e-66	143.093	protein_coding		ACAP1	0.282177	5.77335	14.2544	2.77959e-43	1.39768e-41	87.45	protein_coding		SH3BP5	0.549619	7.68514	14.6619	1.5594e-45	7.6805e-44	92.5465	protein_coding		TUFT1	-0.39299	8.72493	-10.4086	1.57019e-24	7.98722e-23	44.7357	protein_coding		MRC2	-0.543803	7.62412	-18.8291	4.4716e-66	2.2803e-64	139.595	protein_coding		SYNPO2	-1.34366	6.04362	-19.7905	2.6048e-72
AOC3	-1.06116	6.76064	-18.2965	1.53268e-67	7.67121e-66	142.846	protein_coding		TRMT11	-0.498263	8.12196	-14.2523	2.8547e-43	1.43212e-41	87.4236	protein_coding		MFAP4	0.762624	6.55915	14.6568	1.66566e-45	8.1852e-44	92.4811	protein_coding		PPP1CB	-0.268482	9.59364	-10.4084	1.57365e-24	7.98722e-23	44.7335	protein_coding		TMEM119	-0.897995	5.69146	-18.7972	6.82126e-66	3.47034e-64	139.175	protein_coding		STOM	-0.655451	6.96666	-19.7882	2.68858e-72
SIGLEC10	-0.43864	5.64787	-18.2577	2.73652e-67	1.36649e-65	142.269	protein_coding		KIF2C	-0.524267	7.67575	-14.2508	2.90715e-43	1.45505e-41	87.4055	protein_coding		SH3PXD2A	0.298302	6.35042	14.6397	2.07469e-45	1.01721e-43	92.263	protein_coding		SMCHD1	0.306052	5.73376	10.4041	1.64233e-24	8.31624e-23	44.6913	protein_coding		C5orf34	0.733204	6.03656	18.7959	6.93124e-66	3.51801e-64	139.159	protein_coding		MSR1	-0.463059	4.33869	-19.7776	3.11008e-72
POSTN	-0.8554	6.70739	-18.248	3.16187e-67	1.57525e-65	142.125	protein_coding		CCT7	-0.273619	10.4112	-14.2445	3.14853e-43	1.57223e-41	87.3264	protein_coding		PDLIM7	0.313345	5.81992	14.6202	2.6635e-45	1.30294e-43	92.0149	protein_coding		XAF1	0.504182	6.57501	10.3835	2.00821e-24	1.01452e-22	44.4928	protein_coding		CTSK	-1.2374	9.15352	-18.7921	7.29115e-66	3.69202e-64	139.108	protein_coding		LY86	-0.614262	6.6022	-19.7441	4.9206e-72
PDGFRB	-0.715562	7.60965	-18.2467	3.22097e-67	1.60101e-65	142.107	protein_coding		PBK	-0.939585	8.34605	-14.23	3.77688e-43	1.88165e-41	87.1459	protein_coding		GRP	0.828133	5.29189	14.5981	3.53367e-45	1.72472e-43	91.7342	protein_coding		CD160	0.207836	4.0418	10.3822	2.03292e-24	1.02461e-22	44.4807	protein_coding		AUNIP	0.632726	6.09727	18.79	7.49498e-66	3.78636e-64	139.081	protein_coding		SERPINE1	-1.08664	6.32628	-19.7333	5.70304e-72
SDC2	-0.791906	7.16997	-18.2312	4.0597e-67	2.01328e-65	141.877	protein_coding		KIF21A	-0.479382	5.95045	-14.2292	3.81611e-43	1.89682e-41	87.1357	protein_coding		CLIC4	0.643644	7.93461	14.5967	3.60107e-45	1.75366e-43	91.7154	protein_coding		TAF5	0.342336	6.50892	10.3644	2.41921e-24	1.21647e-22	44.3089	protein_coding		GLI3	-0.385747	5.29125	-18.7882	7.67506e-66	3.8683e-64	139.057	protein_coding		TRPS1	-0.674998	5.1506	-19.6979	9.25051e-72
MSR1	-0.406077	4.41449	-18.2274	4.29833e-67	2.12674e-65	141.82	protein_coding		CD74	0.650344	8.15482	14.2256	3.99087e-43	1.97914e-41	87.0912	protein_coding		ZNF423	0.747831	5.90827	14.5907	3.88873e-45	1.88949e-43	91.6391	protein_coding		CCL18	0.996567	8.20878	10.3599	2.52677e-24	1.26761e-22	44.266	protein_coding		ORC6	0.730055	8.2126	18.7835	8.16674e-66	4.10654e-64	138.996	protein_coding		S1PR1	-0.592562	5.60901	-19.6951	9.61198e-72
DPYSL3	-0.702434	6.01462	-18.2249	4.46068e-67	2.20203e-65	141.783	protein_coding		CCNJ	-0.359189	5.56147	-14.2233	4.11081e-43	2.03396e-41	87.0619	protein_coding		TCEAL3	0.619375	7.78373	14.5844	4.21515e-45	2.0435e-43	91.5591	protein_coding		CENPN	0.289065	6.39273	10.359	2.54927e-24	1.27593e-22	44.2572	protein_coding		PRIM1	0.673828	7.58515	18.7549	1.19127e-65	5.96242e-64	138.62	protein_coding		TLR1	-0.768169	4.24789	-19.6915	1.00985e-71
AMOTL1	-0.300821	5.51854	-18.2179	4.95434e-67	2.44015e-65	141.678	protein_coding		NUP155	-0.465751	7.10535	-14.2159	4.51019e-43	2.22647e-41	86.9699	protein_coding		NEGR1	0.397846	3.88296	14.582	4.34468e-45	2.10158e-43	91.529	protein_coding		DCHS1	-0.345762	6.48278	-10.3557	2.63179e-24	1.31419e-22	44.2258	protein_coding		KLHL6	-0.503863	4.20375	-18.7307	1.63978e-65	8.16944e-64	138.301	protein_coding		ITGBL1	-0.953723	4.65222	-19.6732	1.29648e-71
PNMA1	-0.803711	7.55035	-18.211	5.49133e-67	2.69849e-65	141.576	protein_coding		BCCIP	-0.34822	7.40893	-14.2083	4.96004e-43	2.44296e-41	86.8756	protein_coding		ILK	0.376647	9.44801	14.5634	5.51076e-45	2.65376e-43	91.2929	protein_coding		ITGB2	0.47432	6.78884	10.3514	2.74631e-24	1.36822e-22	44.1837	protein_coding		GPNMB	-1.33954	6.33138	-18.7181	1.93575e-65	9.60177e-64	138.136	protein_coding		CCL18	-1.53741	7.78363	-19.6254	2.49098e-71
COL5A1	-1.00484	8.47945	-18.2056	5.95183e-67	2.91815e-65	141.496	protein_coding		PSRC1	-0.53929	6.84328	-14.2073	5.02112e-43	2.46743e-41	86.8635	protein_coding		SETBP1	0.679025	5.3272	14.5539	6.22257e-45	2.98987e-43	91.1723	protein_coding		BTN3A2	0.464247	7.89353	10.3364	3.17778e-24	1.57954e-22	44.0396	protein_coding		KPNA2	0.589172	10.5354	18.7181	1.93616e-65	9.60177e-64	138.136	protein_coding		HSPB8	-0.723786	5.45168	-19.6178	2.76597e-71
TMEM119	-0.726445	5.83031	-18.203	6.18489e-67	3.02556e-65	141.457	protein_coding		C1orf109	-0.383609	6.7862	-14.1934	5.97857e-43	2.93126e-41	86.6903	protein_coding		ZNF667	0.189522	3.90993	14.5518	6.39541e-45	3.06611e-43	91.1451	protein_coding		HLA-C	0.28597	12.1129	10.3303	3.37147e-24	1.67197e-22	43.9812	protein_coding		BUB1	0.406045	5.06971	18.663	3.99835e-65	1.97831e-63	137.414	protein_coding		MS4A6A	-0.654976	6.36232	-19.5919	3.93577e-71
ACKR1	-0.839792	6.13917	-18.195	6.9654e-67	3.39968e-65	141.339	protein_coding		LRRC8B	-0.304319	5.32067	-14.1905	6.20092e-43	3.0334e-41	86.6541	protein_coding		GPR161	0.281593	5.34862	14.5344	7.98178e-45	3.81819e-43	90.9251	protein_coding		COPS3	0.297096	8.45261	10.3245	3.56722e-24	1.765e-22	43.9255	protein_coding		F13A1	-1.36685	6.34328	-18.6618	4.06269e-65	2.00556e-63	137.398	protein_coding		MAB21L2	-1.44013	5.40972	-19.5863	4.25038e-71
LRRC32	-0.597491	7.48557	-18.1921	7.2701e-67	3.54041e-65	141.297	protein_coding		ZNF326	-0.290833	5.7522	-14.1883	6.37762e-43	3.1128e-41	86.6263	protein_coding		ATP2B4	0.481739	6.69427	14.514	1.03598e-44	4.94481e-43	90.6661	protein_coding		ISG15	0.669908	9.31195	10.3069	4.23158e-24	2.08893e-22	43.7569	protein_coding		PRMT3	0.764374	7.73694	18.6577	4.2868e-65	2.11137e-63	137.344	protein_coding		COL6A1	-0.462097	5.96234	-19.572	5.16412e-71
LBH	-0.731343	7.59273	-18.1567	1.23162e-66	5.9843e-65	140.772	protein_coding		CCL11	1.12021	7.07099	14.1875	6.44466e-43	3.13844e-41	86.6159	protein_coding		KANK4	0.651948	4.93857	14.5137	1.03927e-44	4.94959e-43	90.663	protein_coding		KIF2C	0.394335	7.67575	10.3008	4.48993e-24	2.21142e-22	43.6984	protein_coding		CENPK	1.03115	7.19793	18.6447	5.08738e-65	2.49998e-63	137.174	protein_coding		F13A1	-1.29747	6.36294	-19.5599	6.09534e-71
NOL10	0.230085	6.33739	18.1467	1.43006e-66	6.93292e-65	140.623	protein_coding		PIM2	0.430555	7.07394	14.1798	7.09434e-43	3.44705e-41	86.5206	protein_coding		LAMA2	0.422404	5.16882	14.5073	1.12763e-44	5.34683e-43	90.582	protein_coding		PTPRF	-0.293918	8.04107	-10.3002	4.51353e-24	2.21799e-22	43.6932	protein_coding		TCN2	-0.514386	6.65932	-18.6267	6.44426e-65	3.15959e-63	136.939	protein_coding		DCLK1	-0.547831	3.72178	-19.5221	1.01976e-70
COL5A2	-1.02842	9.18673	-18.1417	1.5412e-66	7.45501e-65	140.548	protein_coding		CCDC34	-0.304216	6.01535	-14.1688	8.14624e-43	3.94928e-41	86.3835	protein_coding		CALU	0.390355	8.44428	14.4965	1.29438e-44	6.12408e-43	90.445	protein_coding		ZSCAN18	-0.285637	5.81693	-10.285	5.23104e-24	2.55895e-22	43.5476	protein_coding		RAD51	0.470116	5.77456	18.6246	6.63127e-65	3.24392e-63	136.91	protein_coding		MMP14	-0.622769	7.43716	-19.4511	2.68362e-70
SLFN11	-0.738672	5.65735	-18.1223	2.05577e-66	9.92183e-65	140.262	protein_coding		WDR76	-0.472832	4.59378	-14.1661	8.41802e-43	4.07191e-41	86.3509	protein_coding		NRK	0.283219	3.38987	14.4936	1.34302e-44	6.34036e-43	90.4084	protein_coding		KANK2	-0.203678	6.36987	-10.2742	5.80579e-24	2.8337e-22	43.4447	protein_coding		TCF21	-0.684413	5.3918	-18.6218	6.8779e-65	3.35697e-63	136.874	protein_coding		TMEM204	-0.377356	6.38558	-19.4453	2.9014e-70
RHOG	-0.371639	8.50667	-18.1061	2.61428e-66	1.25893e-64	140.022	protein_coding		TXNDC11	0.293464	8.07706	14.1611	8.96886e-43	4.32867e-41	86.2881	protein_coding		RGS4	0.513242	5.10605	14.4915	1.38009e-44	6.50116e-43	90.3813	protein_coding		CEACAM6	-0.760659	12.206	-10.2683	6.14907e-24	2.99449e-22	43.388	protein_coding		ATAD5	0.440008	5.72496	18.6185	7.18318e-65	3.49808e-63	136.83	protein_coding		GIMAP8	-0.459945	4.48897	-19.3992	5.43169e-70
GGCT	0.422015	10.9477	18.1011	2.81436e-66	1.35227e-64	139.949	protein_coding		ACKR1	0.802896	6.13917	14.1609	8.99472e-43	4.33149e-41	86.2852	protein_coding		E2F2	-0.194754	5.65773	-14.4903	1.40088e-44	6.58473e-43	90.3665	protein_coding		RABEP2	-0.223228	7.03772	-10.2623	6.51847e-24	3.16724e-22	43.3304	protein_coding		CYBB	-0.487704	5.01929	-18.6087	8.16783e-65	3.96865e-63	136.703	protein_coding		LMOD1	-0.983588	5.64026	-19.3925	5.95071e-70
MAGI2-AS3	-0.322159	4.10523	-18.0989	2.90969e-66	1.39497e-64	139.916	lncRNA		CDCA3	-0.501237	8.09001	-14.1473	1.06639e-42	5.11253e-41	86.1164	protein_coding		GPX7	0.719503	6.20674	14.4752	1.69812e-44	7.96458e-43	90.1754	protein_coding		TRIM22	0.73591	8.53371	10.248	7.48514e-24	3.62878e-22	43.1939	protein_coding		WDR12	0.371364	6.53465	18.5964	9.6052e-65	4.65658e-63	136.541	protein_coding		ITPR1	-0.530798	5.00886	-19.3852	6.57774e-70
OPTN	-0.477492	8.19287	-18.0985	2.92519e-66	1.3993e-64	139.91	protein_coding		FANCL	-0.489793	8.21352	-14.1467	1.0737e-42	5.13616e-41	86.1096	protein_coding		FKBP14	0.428867	6.05269	14.434	2.86958e-44	1.34299e-42	89.6545	protein_coding		ELAC1	0.25594	4.95096	10.2436	7.80333e-24	3.77458e-22	43.1528	protein_coding		CDC25C	0.433132	5.44784	18.5811	1.17455e-64	5.68145e-63	136.341	protein_coding		PPP1R3C	-0.567032	4.57705	-19.3591	9.37692e-70
UBE2L6	-0.700834	9.01712	-18.0841	3.62332e-66	1.72943e-64	139.697	protein_coding		EXOSC8	-0.45708	8.91356	-14.137	1.21166e-42	5.78332e-41	85.9897	protein_coding		EDIL3	0.436677	6.0452	14.4193	3.45685e-44	1.61086e-42	89.4696	protein_coding		DBR1	0.302458	7.04878	10.2417	7.95132e-24	3.83758e-22	43.1342	protein_coding		SSX2IP	0.646874	6.67859	18.5777	1.22847e-64	5.929e-63	136.296	protein_coding		TSHZ2	-0.425074	4.82862	-19.3406	1.20493e-69
FPR1	-0.479032	5.55459	-18.0632	4.94279e-66	2.35403e-64	139.388	protein_coding		BEST2	0.846426	5.47195	14.1316	1.29722e-42	6.17807e-41	85.922	protein_coding		LAMB1	0.574213	8.78116	14.4128	3.75564e-44	1.74633e-42	89.3873	protein_coding		WRAP53	0.194375	7.02373	10.2387	8.18732e-24	3.93829e-22	43.1054	protein_coding		MYO1G	-0.458693	5.75007	-18.56	1.54931e-64	7.46083e-63	136.065	protein_coding		RHOQ	-0.546637	7.20171	-19.3383	1.24291e-69
FAP	-1.14762	7.29455	-18.0387	7.10107e-66	3.37449e-64	139.028	protein_coding		ADRB2	0.431516	4.60967	14.1266	1.38004e-42	6.55805e-41	85.8606	protein_coding		SYT11	0.281616	4.93915	14.4	4.41649e-44	2.04921e-42	89.2264	protein_coding		HLA-J	0.369144	10.425	10.2385	8.19642e-24	3.93829e-22	43.1043	transcribed_unprocessed_pseudogene		CPSF3	0.447464	8.69773	18.5592	1.56609e-64	7.52487e-63	136.054	protein_coding		CHST15	-0.605181	5.86489	-19.3247	1.49603e-69
FXYD6	-0.799132	7.18	-18.0171	9.78142e-66	4.63803e-64	138.709	protein_coding		SART3	-0.208917	6.92724	-14.1087	1.72685e-42	8.18729e-41	85.6383	protein_coding		PDPN	0.446278	5.62411	14.3917	4.90457e-44	2.2708e-42	89.1223	protein_coding		A1CF	-0.732648	7.06632	-10.2356	8.4349e-24	4.04389e-22	43.076	protein_coding		CTSO	-0.948857	7.02838	-18.5562	1.6282e-64	7.80597e-63	136.016	protein_coding		CLEC5A	-0.974514	4.51821	-19.3213	1.56678e-69
CXCL9	-1.39585	7.82829	-18.0166	9.86171e-66	4.66586e-64	138.701	protein_coding		PDS5A	-0.35377	7.19218	-14.1085	1.73046e-42	8.18729e-41	85.6362	protein_coding		FIGN	0.200188	3.66908	14.3633	7.03308e-44	3.24934e-42	88.7644	protein_coding		DHFR	0.374724	7.75261	10.2351	8.47753e-24	4.05534e-22	43.071	protein_coding		RRM2	0.827799	10.1998	18.5474	1.82831e-64	8.72664e-63	135.9	protein_coding		PDLIM4	-0.418502	5.58784	-19.2779	2.82072e-69
TRIB2	-0.773464	6.66656	-18.0118	1.05787e-65	4.99417e-64	138.631	protein_coding		LRP8	-0.605198	6.64865	-14.108	1.74168e-42	8.22239e-41	85.6298	protein_coding		GXYLT2	0.842666	6.05528	14.3413	9.28996e-44	4.27378e-42	88.4881	protein_coding		RTTN	0.161365	4.84698	10.2332	8.63093e-24	4.1196e-22	43.0533	protein_coding		MFNG	-0.366516	5.65936	-18.5407	1.99724e-64	9.49105e-63	135.812	protein_coding		CDK14	-0.370854	5.54263	-19.2577	3.7083e-69
NPC2	-0.40582	10.5409	-18.0086	1.10972e-65	5.22753e-64	138.583	protein_coding		MCMBP	-0.224367	6.33787	-14.1052	1.80365e-42	8.49641e-41	85.5951	protein_coding		PDZD2	0.332909	4.23867	14.3251	1.139e-43	5.22875e-42	88.2857	protein_coding		CSRP1	-0.425977	9.94754	-10.2167	1.01171e-23	4.81835e-22	42.8965	protein_coding		HSPB2	-0.486133	5.79051	-18.5171	2.72034e-64	1.28989e-62	135.505	protein_coding		TMEM140	-0.636292	6.32488	-19.2552	3.83842e-69
ZFPM2	-0.873122	4.5959	-18.0038	1.19046e-65	5.59566e-64	138.513	protein_coding		SKA1	-0.599626	4.99382	-14.0945	2.06184e-42	9.69153e-41	85.4624	protein_coding		TPM2	0.348632	6.16296	14.3195	1.22354e-43	5.60498e-42	88.2146	protein_coding		IFI44L	1.06059	6.26598	10.2105	1.074e-23	5.10375e-22	42.8375	protein_coding		GZMH	-0.755495	5.45212	-18.5028	3.28301e-64	1.55329e-62	135.317	protein_coding		TMEM200B	-0.758709	5.58059	-19.2415	4.62008e-69
GPX3	-1.07763	7.3893	-17.9801	1.69263e-65	7.93883e-64	138.163	protein_coding		NAA50	-0.367554	7.70277	-14.0822	2.40387e-42	1.12747e-40	85.3102	protein_coding		PLXDC1	0.343098	5.8823	14.3124	1.3376e-43	6.11451e-42	88.1261	protein_coding		DACT3	-0.231951	5.43911	-10.2084	1.09641e-23	5.1988e-22	42.8171	protein_coding		CXCR6	-0.448688	5.67568	-18.5013	3.34586e-64	1.57957e-62	135.298	protein_coding		EDNRA	-1.11747	6.57586	-19.2397	4.73406e-69
CHST2	-0.256545	4.70902	-17.9722	1.90145e-65	8.89896e-64	138.047	protein_coding		DFFB	-0.491609	6.03972	-14.0812	2.43527e-42	1.13973e-40	85.2973	protein_coding		PAM	0.516839	9.28792	14.3114	1.35564e-43	6.1839e-42	88.1128	protein_coding		TRAF1	0.13999	5.03729	10.1962	1.23253e-23	5.83145e-22	42.7016	protein_coding		C20orf194	-0.578504	5.74721	-18.4958	3.60032e-64	1.69599e-62	135.225	protein_coding		FCGR2A	-0.543536	5.08205	-19.2175	6.39649e-69
SH2D3C	-0.216702	5.0615	-17.9444	2.86516e-65	1.33802e-63	137.639	protein_coding		SCN1B	0.317268	6.32157	14.078	2.53346e-42	1.18312e-40	85.2581	protein_coding		ECSCR	0.379746	6.18319	14.3112	1.3587e-43	6.18482e-42	88.1106	protein_coding		TXNL4B	0.232079	6.45746	10.1959	1.23545e-23	5.83253e-22	42.6993	protein_coding		MASTL	0.808626	6.32643	18.4749	4.73266e-64	2.21973e-62	134.953	protein_coding		MN1	-0.967194	4.89374	-19.2128	6.81367e-69
ITGA5	-0.772243	7.70894	-17.9366	3.21808e-65	1.4996e-63	137.523	protein_coding		TIMM8A	-0.292879	4.86862	-14.0655	2.96029e-42	1.37947e-40	85.1037	protein_coding		LPP	0.304008	7.32134	14.2886	1.80676e-43	8.20547e-42	87.8276	protein_coding		SNX10	0.564858	7.7011	10.1898	1.31007e-23	6.17132e-22	42.6414	protein_coding		MELK	0.745677	8.67904	18.4743	4.77132e-64	2.23302e-62	134.945	protein_coding		ABCA1	-0.466914	5.67274	-19.2098	7.09826e-69
BCAT1	-0.768111	5.80953	-17.9279	3.65887e-65	1.70133e-63	137.395	protein_coding		MCM4	-0.479897	7.1029	-14.0645	2.99684e-42	1.3935e-40	85.0915	protein_coding		FAT4	0.609464	5.45705	14.2884	1.8102e-43	8.20547e-42	87.8257	protein_coding		METTL4	0.320291	5.67884	10.1876	1.33901e-23	6.29391e-22	42.6198	protein_coding		CD300A	-0.452289	5.42089	-18.4467	6.84719e-64	3.19762e-62	134.585	protein_coding		MMP19	-0.448182	6.39369	-19.1199	2.39739e-68
HVCN1	-0.33635	6.97701	-17.9148	4.43835e-65	2.05935e-63	137.203	protein_coding		CD8A	0.742865	6.6496	14.0564	3.31542e-42	1.53833e-40	84.9913	protein_coding		PAPPA	0.284016	4.8244	14.2848	1.89492e-43	8.57154e-42	87.7803	protein_coding		RPARP-AS1	0.243865	4.87475	10.185	1.37222e-23	6.43603e-22	42.5956	lncRNA		CLDN5	-0.598335	6.55528	-18.4454	6.96224e-64	3.24435e-62	134.569	protein_coding		ENPP2	-1.19553	6.86755	-19.1197	2.40375e-68
IGLC1	-0.807946	7.89404	-17.8928	6.13501e-65	2.8405e-63	136.881	IG_C_gene		UBE3C	-0.202658	5.14155	-14.0561	3.32687e-42	1.54033e-40	84.9879	protein_coding		DIO2	0.390992	5.76763	14.2154	4.53827e-43	2.04857e-41	86.9132	protein_coding		MYBBP1A	0.246446	6.66085	10.1723	1.55065e-23	7.24149e-22	42.475	protein_coding		PRELP	-0.638139	6.1273	-18.4451	6.99508e-64	3.25264e-62	134.564	protein_coding		CLIC2	-0.802397	5.22758	-19.1065	2.87206e-68
MMP19	-0.359103	6.44516	-17.8808	7.32805e-65	3.38562e-63	136.704	protein_coding		UPF3B	-0.313746	6.40401	-14.0524	3.48278e-42	1.60907e-40	84.9425	protein_coding		CHN1	0.597374	7.23926	14.2063	5.08564e-43	2.29087e-41	86.8002	protein_coding		ACP5	0.536814	7.84006	10.1669	1.63245e-23	7.60709e-22	42.4242	protein_coding		GNG2	-0.345647	5.17502	-18.4449	7.01471e-64	3.25477e-62	134.561	protein_coding		TFEC	-0.419903	3.63042	-19.0697	4.72262e-68
WWTR1	-0.638046	6.56795	-17.8803	7.38138e-65	3.40299e-63	136.697	protein_coding		PLEKHA8	-0.2103	5.22268	-14.0487	3.65048e-42	1.68296e-40	84.8958	protein_coding		MEIS2	1.02845	6.48809	14.1592	9.17838e-43	4.12588e-41	86.214	protein_coding		BUB1	0.222718	5.07941	10.1569	1.79624e-23	8.35232e-22	42.3299	protein_coding		CCL11	-1.50716	7.00684	-18.4372	7.75436e-64	3.59025e-62	134.462	protein_coding		C1QB	-1.16339	7.44189	-19.0362	7.41816e-68
LILRB4	-0.311535	4.41574	-17.8734	8.16577e-65	3.7566e-63	136.596	protein_coding		ZGRF1	-0.190331	4.3002	-14.0231	5.01924e-42	2.30416e-40	84.58	protein_coding		KCNJ8	0.517023	5.73143	14.1574	9.39709e-43	4.21544e-41	86.1906	protein_coding		MX1	0.784304	8.50304	10.1486	1.94562e-23	9.02751e-22	42.251	protein_coding		AEBP1	-1.21211	8.19796	-18.4325	8.24772e-64	3.80239e-62	134.4	protein_coding		MCAM	-0.876264	7.81372	-18.9734	1.73103e-67
ADAM12	-0.656193	5.56036	-17.8664	9.05333e-65	4.15607e-63	136.493	protein_coding		GTPBP4	-0.291847	7.74942	-14.0149	5.55898e-42	2.54653e-40	84.4787	protein_coding		LRRC15	0.440907	5.74985	14.1553	9.64806e-43	4.31905e-41	86.1645	protein_coding		ROCK2	-0.315938	8.07984	-10.1459	1.99755e-23	9.24863e-22	42.225	protein_coding		WDR3	0.336921	6.01527	18.4295	8.58007e-64	3.9472e-62	134.361	protein_coding		LST1	-0.531029	6.70709	-18.9681	1.85712e-67
CYYR1	-0.563988	5.53113	-17.8484	1.1806e-64	5.40825e-63	136.229	protein_coding		TRIM24	-0.420205	6.67741	-14.0083	6.03237e-42	2.75754e-40	84.3977	protein_coding		LOXL2	0.280667	6.07775	14.1465	1.07701e-42	4.8114e-41	86.0552	protein_coding		LAIR2	0.426366	5.92627	10.145	2.01459e-23	9.30756e-22	42.2166	protein_coding		MAN1C1	-0.653255	5.88218	-18.3977	1.30096e-63	5.96099e-62	133.946	protein_coding		SETBP1	-0.915555	5.29675	-18.9514	2.3287e-67
ENG	-0.397879	6.63897	-17.8093	2.09805e-64	9.57048e-63	135.657	protein_coding		FBLN5	0.699754	6.78862	14.0071	6.11859e-42	2.79106e-40	84.3836	protein_coding		IGFBP4	0.648012	9.30224	14.1183	1.53104e-42	6.82559e-41	85.706	protein_coding		CPE	-0.870933	7.07533	-10.1376	2.16147e-23	9.96489e-22	42.1472	protein_coding		CCNB1	0.882951	8.3925	18.3977	1.30126e-63	5.96099e-62	133.946	protein_coding		APBB1IP	-0.290915	5.15163	-18.948	2.43731e-67
EHD2	-0.417448	7.21958	-17.8086	2.1198e-64	9.64931e-63	135.646	protein_coding		RLIM	-0.41964	7.30663	-14	6.6871e-42	3.04397e-40	84.2955	protein_coding		CLDN11	0.307532	4.29552	14.0904	2.16887e-42	9.60968e-41	85.3603	protein_coding		TAF4B	0.324887	5.82553	10.1247	2.44459e-23	1.12462e-21	42.0257	protein_coding		TRANK1	-0.659518	6.4222	-18.3937	1.37099e-63	6.25391e-62	133.894	protein_coding		CPA3	-1.46005	6.64669	-18.9423	2.63169e-67
GPR137B	-0.61133	7.47503	-17.7988	2.44982e-64	1.11282e-62	135.502	protein_coding		ITGB7	0.381657	6.79862	13.9938	7.22202e-42	3.28056e-40	84.2192	protein_coding		MEF2C	0.469332	6.03864	14.0893	2.19996e-42	9.72751e-41	85.3462	protein_coding		SLC25A17	0.202454	6.81021	10.1185	2.59442e-23	1.19101e-21	41.967	protein_coding		DERL3	-0.456951	6.11143	-18.3903	1.43327e-63	6.52423e-62	133.85	protein_coding		GYPC	-0.636943	7.10183	-18.9323	3.00866e-67
DPEP2	-0.347939	4.92449	-17.7979	2.4795e-64	1.12394e-62	135.49	protein_coding		SPICE1	-0.316395	5.03072	-13.9898	7.58752e-42	3.43936e-40	84.1702	protein_coding		TSPYL4	0.505338	7.98393	14.0842	2.34594e-42	1.03518e-40	85.2824	protein_coding		VRK1	0.383844	8.04737	10.1179	2.60894e-23	1.19514e-21	41.9615	protein_coding		PRC1	0.810303	8.86413	18.3886	1.46599e-63	6.64826e-62	133.827	protein_coding		MYO1F	-0.536843	6.57386	-18.9235	3.38723e-67
TLR7	-0.300224	4.55157	-17.757	4.52319e-64	2.04603e-62	134.892	protein_coding		XPNPEP3	-0.223468	5.65445	-13.9824	8.3211e-42	3.76399e-40	84.0787	protein_coding		SRGAP2C	0.578016	6.06481	14.0578	3.25851e-42	1.43202e-40	84.9562	protein_coding		SAMD12	-0.386118	5.30829	-10.1175	2.61992e-23	1.19763e-21	41.9574	protein_coding		GPX3	-1.35852	7.19303	-18.3885	1.46666e-63	6.64826e-62	133.827	protein_coding		RERG	-0.865052	4.70122	-18.8614	7.81304e-67
MOXD1	-0.502782	5.16652	-17.7533	4.77506e-64	2.1543e-62	134.838	protein_coding		ATR	-0.368042	6.43413	-13.9801	8.55348e-42	3.86103e-40	84.0514	protein_coding		MATN3	0.633912	3.28825	14.0495	3.61159e-42	1.58397e-40	84.8541	protein_coding		C1orf174	0.3542	7.10959	10.117	2.63158e-23	1.20042e-21	41.953	protein_coding		FERMT3	-0.829355	6.55821	-18.381	1.61799e-63	7.31888e-62	133.729	protein_coding		ACTN1	-0.445657	8.93124	-18.8337	1.13306e-66
ATP2B4	-0.509335	6.69427	-17.7532	4.78246e-64	2.1543e-62	134.836	protein_coding		EXOSC3	-0.270812	6.25621	-13.9732	9.32739e-42	4.2016e-40	83.9655	protein_coding		BMPR2	0.375239	6.50526	14.047	3.72935e-42	1.63231e-40	84.8222	protein_coding		SP100	0.236869	5.978	10.114	2.70957e-23	1.2334e-21	41.9241	protein_coding		KCNMB1	-0.548381	4.90883	-18.3791	1.65852e-63	7.48655e-62	133.705	protein_coding		PEG3	-0.608456	4.05832	-18.8015	1.7459e-66
RASSF4	-0.330575	5.47892	-17.7472	5.22316e-64	2.34792e-62	134.749	protein_coding		FBXO22	-0.310324	5.84783	-13.9605	1.09149e-41	4.9065e-40	83.8096	protein_coding		RGS2	0.990956	8.86567	14.0461	3.77059e-42	1.64702e-40	84.8113	protein_coding		ELP5	0.280276	7.33757	10.113	2.73526e-23	1.24248e-21	41.9148	protein_coding		CRYAB	-1.03869	6.69462	-18.3787	1.66861e-63	7.51639e-62	133.699	protein_coding		CD84	-0.287895	5.10039	-18.8014	1.74755e-66
HLA-C	-0.386301	12.1129	-17.7401	5.79067e-64	2.59763e-62	134.646	protein_coding		RFC5	-0.391901	7.41416	-13.9593	1.10765e-41	4.96878e-40	83.795	protein_coding		KCNMB1	0.44707	4.99988	14.0294	4.64076e-42	2.02304e-40	84.6052	protein_coding		NME7	-0.395142	8.95443	-10.112	2.76042e-23	1.25127e-21	41.9058	protein_coding		CYGB	-0.437316	6.71778	-18.3749	1.7539e-63	7.88415e-62	133.649	protein_coding		ILK	-0.521169	9.42316	-18.8001	1.78011e-66
CRYAB	-0.885124	6.88417	-17.739	5.89054e-64	2.63696e-62	134.629	protein_coding		GEMIN5	-0.354711	7.81325	-13.9518	1.2155e-41	5.44131e-40	83.7029	protein_coding		SLC2A3	0.841378	7.14761	14.0277	4.73855e-42	2.06151e-40	84.5845	protein_coding		CDT1	0.37433	7.25264	10.1049	2.95325e-23	1.33309e-21	41.8392	protein_coding		TUBB6	-1.10993	7.85324	-18.372	1.82053e-63	8.16672e-62	133.612	protein_coding		DPT	-1.10248	5.61362	-18.7965	1.86787e-66
SSPN	-0.556462	5.37316	-17.7376	6.01044e-64	2.68508e-62	134.609	protein_coding		NUSAP1	-0.569435	8.20803	-13.9513	1.22361e-41	5.46629e-40	83.6963	protein_coding		MAGEH1	0.614863	6.94539	14.02	5.21508e-42	2.26427e-40	84.4894	protein_coding		ZNF165	0.54268	6.14832	10.0971	3.18115e-23	1.43298e-21	41.7658	protein_coding		CLIP3	-0.370228	5.52208	-18.3656	1.97876e-63	8.8581e-62	133.529	protein_coding		CAV2	-0.768244	6.51308	-18.7903	2.02956e-66
KLRD1	-0.388267	5.20337	-17.7344	6.29562e-64	2.80668e-62	134.563	protein_coding		MTAP	-0.340274	5.46552	-13.9507	1.23141e-41	5.4898e-40	83.69	protein_coding		SYNM	1.2864	6.86786	14.0157	5.50059e-42	2.38344e-40	84.4365	protein_coding		MTFR2	0.300534	5.48247	10.0946	3.26043e-23	1.46564e-21	41.7415	protein_coding		RNASE6	-1.00525	7.21657	-18.3633	2.04151e-63	9.12014e-62	133.498	protein_coding		ACVR1	-0.473133	8.32858	-18.7826	2.25106e-66
TCEAL3	-0.650977	7.78373	-17.7164	8.20287e-64	3.64943e-62	134.299	protein_coding		NAF1	-0.456623	6.72441	-13.9452	1.3188e-41	5.86729e-40	83.622	protein_coding		CSGALNACT1	0.761967	6.55005	13.9978	6.86822e-42	2.9701e-40	84.216	protein_coding		OAS3	0.339784	6.59515	10.0937	3.28733e-23	1.47466e-21	41.7334	protein_coding		MMP2	-0.450459	5.97359	-18.3629	2.05234e-63	9.14964e-62	133.492	protein_coding		HIC1	-0.380122	5.07493	-18.78	2.32987e-66
MAN1C1	-0.508854	5.97054	-17.7089	9.15867e-64	4.0663e-62	134.19	protein_coding		PRDM1	0.435392	7.20814	13.9433	1.35011e-41	5.99427e-40	83.5987	protein_coding		VASN	0.370101	6.09541	13.9758	9.0234e-42	3.89429e-40	83.9451	protein_coding		CDCA5	0.391453	7.98204	10.0928	3.3169e-23	1.48485e-21	41.7246	protein_coding		IL1R1	-0.649011	5.84725	-18.3515	2.38017e-63	1.05893e-61	133.345	protein_coding		GNG2	-0.309281	5.17243	-18.7533	3.3325e-66
MRC2	-0.439524	7.70795	-17.7037	9.87796e-64	4.37666e-62	134.114	protein_coding		DSCC1	-0.321654	6.54553	-13.9285	1.62266e-41	7.18958e-40	83.4164	protein_coding		CAV2	0.560135	6.54596	13.9636	1.04984e-41	4.52185e-40	83.7948	protein_coding		LINC00909	0.390046	7.05334	10.0904	3.39381e-23	1.51614e-21	41.7019	lncRNA		TLR8	-0.641599	4.50954	-18.3507	2.40446e-63	1.06754e-61	133.335	protein_coding		ACP5	-0.854172	7.55198	-18.7253	4.8558e-66
S1PR1	-0.450772	5.66158	-17.7021	1.0104e-63	4.46767e-62	134.092	protein_coding		PHF14	-0.417909	6.19773	-13.9243	1.70901e-41	7.55669e-40	83.3649	protein_coding		RNF150	0.388483	4.65986	13.9515	1.22053e-41	5.24658e-40	83.6453	protein_coding		CD72	0.319537	5.24294	10.0885	3.45373e-23	1.53972e-21	41.6847	protein_coding		VAV1	-0.537154	5.59682	-18.3391	2.7982e-63	1.23981e-61	133.184	protein_coding		RSPO3	-1.38767	5.56048	-18.6938	7.397e-66
ACTA2	-0.504002	7.59337	-17.6999	1.0445e-63	4.60903e-62	134.059	protein_coding		NDC1	-0.470983	8.3586	-13.915	1.91575e-41	8.45355e-40	83.2517	protein_coding		NR2F1-AS1	0.21862	4.1908	13.9494	1.25251e-41	5.37335e-40	83.6196	lncRNA		KLC4	-0.212699	6.20434	-10.0805	3.72787e-23	1.65511e-21	41.6093	protein_coding		YEATS4	0.781791	6.70485	18.3372	2.87112e-63	1.26952e-61	133.158	protein_coding		ADAP2	-0.46562	6.57656	-18.6851	8.31183e-66
SLC9A9	-0.300816	5.78181	-17.691	1.18886e-63	5.23534e-62	133.93	protein_coding		S1PR4	0.271407	6.82983	13.9116	1.99903e-41	8.80304e-40	83.2095	protein_coding		FGF1	0.21484	4.50546	13.9208	1.78452e-41	7.64057e-40	83.2682	protein_coding		USF1	0.311062	5.61274	10.0604	4.51305e-23	1.99961e-21	41.4207	protein_coding		MSH2	0.785166	7.8373	18.334	2.99118e-63	1.3199e-61	133.117	protein_coding		TPSB2	-1.15843	6.98223	-18.6773	9.22821e-66
IGLV1-44	-0.900596	7.15693	-17.6872	1.2566e-63	5.52239e-62	133.875	IG_V_gene		RAD54L	-0.418074	7.02366	-13.9104	2.0276e-41	8.91072e-40	83.1954	protein_coding		COL14A1	0.42587	5.03426	13.9121	1.98598e-41	8.48632e-40	83.1621	protein_coding		PIK3CG	0.254285	4.34452	10.0557	4.72063e-23	2.08731e-21	41.3763	protein_coding		HEATR1	0.369109	6.2549	18.3302	3.14468e-63	1.38481e-61	133.068	protein_coding		GPR176	-0.406492	5.53413	-18.6716	9.96391e-66
ADAMTS1	-0.821637	6.1765	-17.6815	1.36773e-63	5.99858e-62	133.79	protein_coding		ZC3HAV1L	-0.375683	5.91388	-13.9009	2.27969e-41	9.99829e-40	83.0792	protein_coding		MAP7D1	0.424619	7.54303	13.9093	2.05708e-41	8.77284e-40	83.1272	protein_coding		TRIM5	0.196424	5.23392	10.0531	4.83682e-23	2.13432e-21	41.3523	protein_coding		EEF1E1	0.505262	6.53282	18.3213	3.53451e-63	1.55332e-61	132.951	protein_coding		ICAM1	-0.562132	6.70871	-18.6678	1.04765e-65
LAT2	-0.271486	5.6894	-17.6737	1.53285e-63	6.70918e-62	133.677	protein_coding		HVCN1	0.320366	6.97701	13.899	2.33464e-41	1.02186e-39	83.0556	protein_coding		SPP1	1.04062	6.45069	13.9048	2.17247e-41	9.24668e-40	83.073	protein_coding		DNMT1	0.304696	8.96851	10.0516	4.90764e-23	2.16116e-21	41.338	protein_coding		PRKCH	-0.347177	5.7208	-18.3103	4.0763e-63	1.78778e-61	132.809	protein_coding		AIF1	-0.516442	7.08423	-18.6576	1.20102e-65
ABCA1	-0.362032	5.71857	-17.6728	1.55241e-63	6.78107e-62	133.664	protein_coding		PEX13	-0.384065	5.50066	-13.881	2.91736e-41	1.27432e-39	82.8346	protein_coding		KLF7	0.398603	5.98106	13.9005	2.29101e-41	9.73207e-40	83.0203	protein_coding		USP7	-0.226579	7.87844	-10.0445	5.24912e-23	2.30619e-21	41.2716	protein_coding		PINK1	-0.539383	7.88397	-18.3073	4.24276e-63	1.85703e-61	132.769	protein_coding		IGF1	-0.772624	5.23161	-18.6363	1.59681e-65
HSD11B1	-0.820404	5.70182	-17.6704	1.60738e-63	7.00702e-62	133.63	protein_coding		MCM7	-0.444777	9.05388	-13.8717	3.2697e-41	1.42535e-39	82.7215	protein_coding		RAB23	0.591027	7.16576	13.8952	2.44784e-41	1.03779e-39	82.9545	protein_coding		CD28	0.139063	3.90816	10.0443	5.25831e-23	2.30619e-21	41.2699	protein_coding		MYL9	-0.834343	7.04207	-18.3066	4.28084e-63	1.86991e-61	132.76	protein_coding		LRCH2	-0.800348	4.22619	-18.6159	2.09745e-65
PLCG2	-0.254543	4.53378	-17.67	1.61689e-63	7.03428e-62	133.624	protein_coding		WDR12	-0.260339	6.50639	-13.8705	3.32012e-41	1.44442e-39	82.7064	protein_coding		VCL	0.373824	7.23778	13.8816	2.89286e-41	1.22406e-39	82.7887	protein_coding		GIMAP4	0.49034	7.04306	10.0433	5.3115e-23	2.3248e-21	41.2599	protein_coding		PUS1	0.521476	7.71817	18.2998	4.67993e-63	2.04011e-61	132.672	protein_coding		P2RX7	-0.459413	4.65969	-18.6001	2.59011e-65
ITPR1	-0.410057	5.05999	-17.6522	2.09807e-63	9.10934e-62	133.364	protein_coding		ARHGDIB	0.497039	8.46282	13.8683	3.41216e-41	1.48148e-39	82.6792	protein_coding		UBE2E2	0.795332	6.69634	13.8644	3.57732e-41	1.51072e-39	82.5779	protein_coding		PPCDC	0.293007	6.15565	10.0423	5.35822e-23	2.34052e-21	41.2513	protein_coding		ADH1B	-1.11588	4.31173	-18.2903	5.29348e-63	2.30293e-61	132.549	protein_coding		EPHA3	-0.410402	3.92395	-18.5951	2.76983e-65
POLR1B	0.280923	7.18223	17.6443	2.35355e-63	1.01981e-61	133.25	protein_coding		TRNT1	-0.383474	6.50401	-13.8621	3.68079e-41	1.59491e-39	82.6041	protein_coding		KCTD10	0.271717	8.33838	13.8606	3.75155e-41	1.58121e-39	82.5307	protein_coding		TGOLN2	-0.248285	8.36883	-10.0164	6.84917e-23	2.98574e-21	41.0091	protein_coding		TGFB1I1	-1.04978	8.05067	-18.2873	5.50922e-63	2.39198e-61	132.509	protein_coding		TGFB3	-0.341371	5.07808	-18.5902	2.95992e-65
ZNF521	-0.775713	4.88745	-17.6368	2.62654e-63	1.13582e-61	133.141	protein_coding		MYNN	-0.226124	5.02021	-13.8609	3.73394e-41	1.6147e-39	82.5899	protein_coding		SCG2	0.794752	5.11853	13.8544	4.04793e-41	1.70281e-39	82.4553	protein_coding		DDX60	0.64793	8.00773	10.0119	7.15225e-23	3.11159e-21	40.9663	protein_coding		SHCBP1	0.918872	6.45059	18.2741	6.54529e-63	2.83612e-61	132.338	protein_coding		PNMA1	-0.998658	7.43337	-18.5876	3.06437e-65
DOK5	-0.432913	5.38077	-17.6331	2.77116e-63	1.19597e-61	133.088	protein_coding		DCUN1D5	-0.246398	6.30435	-13.86	3.77658e-41	1.62989e-39	82.5786	protein_coding		LINC00702	0.348627	3.57762	13.8521	4.16599e-41	1.74907e-39	82.4267	lncRNA		SVIL	-0.286699	6.75392	-10.009	7.34995e-23	3.19118e-21	40.9394	protein_coding		LILRB2	-0.631742	5.02126	-18.2739	6.56151e-63	2.83746e-61	132.335	protein_coding		SEC31A	-0.490102	9.73059	-18.5796	3.40924e-65
TIMP1	-0.644787	11.5384	-17.6308	2.86849e-63	1.23551e-61	133.053	protein_coding		EIF3J	-0.357144	8.48155	-13.8591	3.81877e-41	1.64481e-39	82.5676	protein_coding		OMD	0.540733	3.92851	13.8513	4.20776e-41	1.76318e-39	82.4168	protein_coding		MOCOS	0.405144	6.38227	10.0069	7.49293e-23	3.24673e-21	40.9204	protein_coding		NOP58	0.636007	10.5171	18.2737	6.57786e-63	2.83885e-61	132.333	protein_coding		CCL21	-1.00441	6.46738	-18.5756	3.59472e-65
GEM	-0.923776	8.4836	-17.6271	3.02516e-63	1.3004e-61	133	protein_coding		THADA	-0.151371	4.92754	-13.8404	4.80681e-41	2.06626e-39	82.3394	protein_coding		PEA15	0.439182	9.02361	13.8233	5.93526e-41	2.48225e-39	82.0754	protein_coding		UBE2S	0.464318	9.10185	9.99304	8.5453e-23	3.69533e-21	40.7907	protein_coding		CILP	-0.960519	5.85382	-18.2593	7.93907e-63	3.41949e-61	132.145	protein_coding		THBS1	-0.698984	6.34199	-18.5563	4.65234e-65
MRGPRF	-0.927134	6.19443	-17.6143	3.64827e-63	1.56514e-61	132.814	protein_coding		TCN2	0.359502	6.69934	13.8344	5.17977e-41	2.22216e-39	82.2653	protein_coding		ZNF281	0.41769	7.46173	13.8155	6.53681e-41	2.72855e-39	81.9796	protein_coding		IL10RA	0.513224	6.58681	9.98346	9.35427e-23	4.02905e-21	40.7015	protein_coding		SFRP2	-2.26814	6.92967	-18.2564	8.23787e-63	3.54114e-61	132.109	protein_coding		FCGR3B	-1.06982	6.39559	-18.5468	5.27895e-65
PRR16	-0.544373	4.8229	-17.6104	3.86415e-63	1.65447e-61	132.757	protein_coding		ERI2	-0.235747	5.02174	-13.833	5.26741e-41	2.25529e-39	82.2487	protein_coding		TMEM119	0.644255	5.83031	13.8086	7.11407e-41	2.96379e-39	81.8956	protein_coding		TFAP2A	0.364883	4.69936	9.97806	9.84352e-23	4.23134e-21	40.6512	protein_coding		FGR	-0.688749	5.91977	-18.2495	9.01797e-63	3.86878e-61	132.019	protein_coding		LCP2	-0.477231	4.91528	-18.5166	7.89796e-65
VAV1	-0.394064	5.65376	-17.6091	3.9369e-63	1.68229e-61	132.738	protein_coding		P2RY13	0.644382	5.01732	13.8218	6.04431e-41	2.58281e-39	82.1122	protein_coding		RUNX2	0.198876	5.03422	13.8016	7.74744e-41	3.22144e-39	81.8109	protein_coding		HMCN1	-0.655774	5.13766	-9.976	1.00366e-22	4.3058e-21	40.632	protein_coding		DTL	0.804614	7.64643	18.2368	1.06477e-62	4.55892e-61	131.853	protein_coding		PTPRC	-0.634405	5.2256	-18.4975	1.01901e-64
MIR100HG	-1.0247	4.61602	-17.5951	4.82916e-63	2.05949e-61	132.535	lncRNA		TBC1D30	-0.383034	5.52609	-13.8174	6.38055e-41	2.72111e-39	82.0586	protein_coding		OLR1	0.871747	4.5104	13.7908	8.84968e-41	3.6727e-39	81.6789	protein_coding		INO80D	-0.186196	6.39856	-9.97465	1.0166e-22	4.35265e-21	40.6194	protein_coding		LITAF	-0.42521	7.58718	-18.2358	1.07792e-62	4.6061e-61	131.841	protein_coding		HSPG2	-0.590292	7.42146	-18.4946	1.06005e-64
BRCA1	0.419113	6.91021	17.585	5.5974e-63	2.38242e-61	132.388	protein_coding		CSE1L	-0.445007	8.77654	-13.8111	6.8985e-41	2.93621e-39	81.9812	protein_coding		CXCL12	0.850863	6.87536	13.7841	9.60953e-41	3.98041e-39	81.5972	protein_coding		LINC00623	-0.374531	9.57333	-9.97132	1.04902e-22	4.4826e-21	40.5884	lncRNA		NAA15	0.394076	5.47911	18.2314	1.14244e-62	4.87216e-61	131.783	protein_coding		CLIC4	-0.843312	7.92042	-18.4932	1.07901e-64
MEIS1	-0.796759	5.69961	-17.5817	5.87102e-63	2.49397e-61	132.34	protein_coding		MADCAM1	0.382163	5.95454	13.788	9.16216e-41	3.89203e-39	81.6998	protein_coding		SOCS5	0.378443	7.42051	13.7798	1.01223e-40	4.17682e-39	81.5456	protein_coding		FBXO21	-0.189184	7.45221	-9.96999	1.06222e-22	4.53004e-21	40.5761	protein_coding		TGFB1	-0.549512	6.18849	-18.2286	1.18439e-62	5.0411e-61	131.747	protein_coding		DOCK4	-0.45769	4.69345	-18.4717	1.43778e-64
SLIT2	-0.868599	5.39358	-17.5698	6.97965e-63	2.9591e-61	132.168	protein_coding		LATS1	-0.184663	4.57321	-13.784	9.61318e-41	4.07561e-39	81.6521	protein_coding		RFTN1	0.329905	6.05903	13.779	1.02249e-40	4.21111e-39	81.5356	protein_coding		CHEK1	0.367178	6.36566	9.96547	1.10849e-22	4.71806e-21	40.534	protein_coding		FOXM1	0.872853	7.77776	18.2137	1.43902e-62	6.11285e-61	131.553	protein_coding		THBS4	-1.11185	6.35445	-18.4446	2.06212e-64
ECSCR	-0.402875	6.18319	-17.5625	7.7669e-63	3.28642e-61	132.062	protein_coding		INVS	-0.201381	4.35714	-13.7792	1.0197e-40	4.30923e-39	81.5936	protein_coding		KDR	0.453618	6.33287	13.7715	1.12129e-40	4.60924e-39	81.444	protein_coding		HERC6	0.267055	5.51434	9.96461	1.11757e-22	4.74739e-21	40.526	protein_coding		HSPD1	0.480299	7.86073	18.2108	1.49388e-62	6.33345e-61	131.516	protein_coding		PDGFRL	-1.04094	5.62159	-18.4395	2.20814e-64
COL18A1	-0.686362	7.30812	-17.5547	8.69788e-63	3.67316e-61	131.949	protein_coding		WDR3	-0.236587	5.98995	-13.7792	1.02041e-40	4.30923e-39	81.593	protein_coding		CFH	0.871221	6.16295	13.77	1.14237e-40	4.68699e-39	81.4255	protein_coding		SLIRP	0.308888	10.1478	9.95737	1.19647e-22	5.07256e-21	40.4587	protein_coding		NLRC3	-0.69116	4.58739	-18.2067	1.57566e-62	6.66711e-61	131.463	protein_coding		KCNMB1	-0.632854	4.96187	-18.433	2.40553e-64
ABI3BP	-0.407541	4.21126	-17.553	8.92193e-63	3.76043e-61	131.924	protein_coding		ITM2A	0.766574	6.58604	13.7755	1.06709e-40	4.49759e-39	81.5486	protein_coding		OLFML3	0.814	7.44395	13.7679	1.17201e-40	4.79947e-39	81.4001	protein_coding		HLA-G	0.290081	10.9021	9.94227	1.37921e-22	5.83588e-21	40.3184	protein_coding		NUP35	0.581436	8.40351	18.2008	1.70134e-62	7.18486e-61	131.387	protein_coding		ENOX1	-0.488315	4.90101	-18.3866	4.45907e-64
SLC7A7	-0.614201	8.23873	-17.5438	1.01884e-62	4.28588e-61	131.791	protein_coding		NUP98	-0.270267	7.63834	-13.7654	1.20907e-40	5.07622e-39	81.4247	protein_coding		EPYC	1.20026	3.92714	13.7565	1.34744e-40	5.50743e-39	81.2617	protein_coding		NID1	-0.33604	6.81401	-9.94193	1.38357e-22	5.84289e-21	40.3153	protein_coding		CDCA3	0.671482	8.11688	18.2003	1.71233e-62	7.21714e-61	131.38	protein_coding		NAGK	-0.429878	8.73671	-18.3606	6.30617e-64
PNRC1	-0.379913	9.70493	-17.5385	1.10197e-62	4.62656e-61	131.713	protein_coding		MEI1	0.211538	5.55752	13.7651	1.21348e-40	5.08487e-39	81.4211	protein_coding		ANKRD6	0.453164	4.25231	13.7545	1.38146e-40	5.63582e-39	81.2369	protein_coding		PTTG1	0.373433	10.3051	9.93576	1.46624e-22	6.17995e-21	40.2581	protein_coding		DDX55	0.582639	6.8246	18.1964	1.80259e-62	7.58281e-61	131.329	protein_coding		MYCT1	-0.375226	4.60114	-18.3515	7.1168e-64
HAPLN3	-0.362874	7.16974	-17.5152	1.54503e-62	6.47413e-61	131.377	protein_coding		STAP1	0.289501	3.93947	13.7622	1.25641e-40	5.25456e-39	81.3866	protein_coding		SUSD5	0.25143	3.26344	13.7492	1.47382e-40	6.00131e-39	81.1727	protein_coding		NUB1	0.152615	6.11609	9.93516	1.47454e-22	6.20284e-21	40.2525	protein_coding		CLIC2	-0.921105	5.24326	-18.1876	2.02165e-62	8.48779e-61	131.215	protein_coding		LDOC1	-0.562696	6.01324	-18.3513	7.12852e-64
MAGEH1	-0.661462	6.94539	-17.4744	2.79442e-62	1.16643e-60	130.787	protein_coding		C1QA	0.904683	8.19092	13.7581	1.32196e-40	5.51802e-39	81.3362	protein_coding		HEY1	0.421095	6.9969	13.7261	1.95493e-40	7.94538e-39	80.8923	protein_coding		MYZAP	-0.386416	6.62587	-9.93077	1.53672e-22	6.45184e-21	40.2118	protein_coding		TRIM22	-1.35525	8.21083	-18.157	3.00872e-62	1.26075e-60	130.819	protein_coding		BEX4	-1.32866	6.03745	-18.3467	7.58387e-64
CACNA2D1	-0.502707	5.37041	-17.4742	2.80381e-62	1.16809e-60	130.784	protein_coding		CLDN5	0.451016	6.57574	13.7555	1.36343e-40	5.68019e-39	81.3056	protein_coding		PCDH9	0.176807	3.53517	13.702	2.62517e-40	1.06494e-38	80.5997	protein_coding		LYN	0.353368	8.3354	9.91354	1.80672e-22	7.55608e-21	40.0521	protein_coding		ICAM1	-0.693613	6.73744	-18.1554	3.07346e-62	1.28538e-60	130.798	protein_coding		CSRP1	-0.734349	9.96262	-18.3179	1.11178e-63
AKT3	-0.306754	4.81864	-17.4631	3.29409e-62	1.36971e-60	130.623	protein_coding		THAP9	-0.3511	4.30249	-13.7487	1.48199e-40	6.15039e-39	81.2229	protein_coding		RBPMS	0.364716	6.0956	13.689	3.07614e-40	1.24555e-38	80.4424	protein_coding		PTPN2	0.125768	5.57912	9.91065	1.85642e-22	7.74893e-21	40.0253	protein_coding		ABI3BP	-0.531018	4.14337	-18.1526	3.18733e-62	1.33043e-60	130.762	protein_coding		TRPC1	-0.627244	4.25365	-18.3049	1.3208e-63
LATS2	-0.351529	6.50722	-17.4599	3.45326e-62	1.43313e-60	130.576	protein_coding		NAGK	0.353633	8.86193	13.7469	1.51572e-40	6.27834e-39	81.2006	protein_coding		PDZRN4	0.648824	3.59552	13.6783	3.50571e-40	1.41419e-38	80.3127	protein_coding		BIRC5	0.384533	7.50062	9.90984	1.87052e-22	7.79274e-21	40.0178	protein_coding		CCL22	-0.468934	6.23984	-18.1502	3.28778e-62	1.36972e-60	130.731	protein_coding		ISM1	-0.575742	4.24869	-18.3046	1.32637e-63
GABARAP	-0.313069	11.0368	-17.4502	3.97468e-62	1.64637e-60	130.436	protein_coding		IGHV3-54	0.363855	4.38271	13.742	1.60904e-40	6.65215e-39	81.1413	IG_V_pseudogene		MDFIC	0.457759	5.20207	13.6715	3.80756e-40	1.53309e-38	80.2307	protein_coding		CXXC5	-0.413214	9.27001	-9.89627	2.12433e-22	8.83315e-21	39.8923	protein_coding		GUSBP11	-0.483143	7.25009	-18.1337	4.07862e-62	1.69592e-60	130.516	lncRNA		MPEG1	-0.995854	6.60542	-18.3043	1.33145e-63
STAT2	-0.315115	6.95985	-17.4465	4.19074e-62	1.73255e-60	130.384	protein_coding		SUN2	0.300699	8.19887	13.7408	1.63425e-40	6.74345e-39	81.1259	protein_coding		FLT1	0.272592	5.7393	13.6623	4.26176e-40	1.71279e-38	80.1189	protein_coding		RASSF5	0.380303	6.69505	9.89573	2.13511e-22	8.8609e-21	39.8873	protein_coding		NUP205	0.385924	6.9182	18.1178	5.01391e-62	2.08082e-60	130.31	protein_coding		PRDM6	-0.469362	5.18571	-18.2928	1.55106e-63
IGHM	-1.05502	7.49118	-17.4422	4.46063e-62	1.84061e-60	130.322	IG_C_gene		ZBED4	-0.310223	6.06983	-13.7374	1.70373e-40	7.01678e-39	81.0846	protein_coding		CAP2	0.589613	5.64938	13.6605	4.35324e-40	1.74631e-38	80.0978	protein_coding		RGS5	-0.419469	6.97623	-9.89259	2.19895e-22	9.10837e-21	39.8583	protein_coding		TOPBP1	0.544597	8.68465	18.1017	6.17683e-62	2.55853e-60	130.103	protein_coding		ST8SIA4	-0.458324	4.08173	-18.2577	2.4709e-63
GBP5	-0.777479	5.66825	-17.4163	6.49796e-62	2.67617e-60	129.947	protein_coding		RPAP3	-0.5065	6.58999	-13.7341	1.77258e-40	7.28644e-39	81.0454	protein_coding		EHD2	0.372797	7.21958	13.6382	5.714e-40	2.28793e-38	79.8279	protein_coding		HSD3B7	0.331153	7.79733	9.88583	2.34254e-22	9.68458e-21	39.7959	protein_coding		ERI2	0.330815	5.04387	18.0994	6.37103e-62	2.63393e-60	130.072	protein_coding		LAIR1	-0.450357	6.32807	-18.2499	2.73831e-63
MCC	-0.490396	5.39282	-17.4096	7.15343e-62	2.94052e-60	129.852	protein_coding		PIGW	-0.542884	6.69973	-13.734	1.77607e-40	7.28695e-39	81.0434	protein_coding		BEND6	0.171183	3.24245	13.6287	6.41533e-40	2.564e-38	79.713	protein_coding		IL12A	0.162853	3.74054	9.88391	2.38513e-22	9.84185e-21	39.7781	protein_coding		FAM107A	-0.491415	5.76158	-18.0955	6.69746e-62	2.7636e-60	130.022	protein_coding		THSD7A	-0.503825	4.02212	-18.2403	3.11222e-63
GPSM3	-0.333562	6.95693	-17.378	1.13015e-61	4.63682e-60	129.396	protein_coding		SPIN4	-0.600547	8.22132	-13.7333	1.78979e-40	7.32932e-39	81.0358	protein_coding		GUCY1A2	0.290073	4.08475	13.6168	7.41745e-40	2.95359e-38	79.5689	protein_coding		PSMB6	0.260387	9.7236	9.88206	2.42684e-22	9.99489e-21	39.761	protein_coding		UNG	0.606279	8.39924	18.0874	7.44328e-62	3.0655e-60	129.917	protein_coding		CHN1	-0.816948	7.20561	-18.226	3.76105e-63
PDE4B	-0.599224	5.35987	-17.3679	1.30789e-61	5.35591e-60	129.251	protein_coding		PBXIP1	0.366551	7.24422	13.7292	1.88279e-40	7.69559e-39	80.9855	protein_coding		TENM4	0.399257	5.56515	13.6134	7.73117e-40	3.07125e-38	79.5278	protein_coding		HEYL	-0.216387	6.09743	-9.87802	2.52022e-22	1.03597e-20	39.7237	protein_coding		DSCC1	0.454095	6.57745	18.0771	8.51247e-62	3.49918e-60	129.783	protein_coding		ETS1	-0.520492	6.73081	-18.2218	3.97199e-63
GNG11	-0.479811	5.58342	-17.3563	1.54683e-61	6.32241e-60	129.084	protein_coding		CSPP1	-0.307453	5.78652	-13.7263	1.95021e-40	7.95611e-39	80.9507	protein_coding		KANK2	0.24734	6.36987	13.6133	7.74134e-40	3.07125e-38	79.5265	protein_coding		ZWINT	0.355858	9.61575	9.87622	2.56317e-22	1.04964e-20	39.7071	protein_coding		TFAM	0.576272	7.0257	18.0535	1.15601e-61	4.74292e-60	129.479	protein_coding		LOXL2	-0.360323	6.07599	-18.1924	5.8686e-63
PDLIM3	-0.579533	5.59974	-17.355	1.57605e-61	6.42969e-60	129.065	protein_coding		FASTKD2	-0.293721	6.21998	-13.7147	2.24862e-40	9.15624e-39	80.8095	protein_coding		PECAM1	0.464046	7.02898	13.6119	7.86855e-40	3.116e-38	79.5103	protein_coding		CEP78	0.295496	6.75685	9.87568	2.57595e-22	1.05288e-20	39.7022	protein_coding		LAT2	-0.368923	5.64974	-18.0458	1.27732e-61	5.23074e-60	129.379	protein_coding		SMARCA1	-0.755413	5.1806	-18.1835	6.59819e-63
IGLL5	-1.17306	8.60696	-17.3319	2.2026e-61	8.96884e-60	128.732	protein_coding		DBR1	-0.390722	7.04878	-13.7106	2.36287e-40	9.60338e-39	80.7603	protein_coding		ACTG2	0.652994	7.07234	13.6033	8.73751e-40	3.45379e-38	79.4064	protein_coding		MUC12	-1.00125	7.27034	-9.86164	2.93746e-22	1.19837e-20	39.5726	protein_coding		NUP107	0.518274	8.93669	18.0087	2.06751e-61	8.45062e-60	128.9	protein_coding		ANXA5	-0.690998	10.3498	-18.1679	8.11427e-63
FYN	-0.710204	6.62089	-17.33	2.2625e-61	9.19545e-60	128.705	protein_coding		LAIR1	0.420924	6.51728	13.7006	2.67093e-40	1.08351e-38	80.6388	protein_coding		TTC7B	0.605296	5.61201	13.5807	1.14953e-39	4.53561e-38	79.1342	protein_coding		CCDC68	0.557361	6.8255	9.85815	3.0348e-22	1.23575e-20	39.5405	protein_coding		FCGR1B	-1.06189	5.36362	-17.9981	2.37052e-61	9.67082e-60	128.764	protein_coding		PDLIM7	-0.408458	5.81426	-18.1653	8.39662e-63
RAMP3	-0.429944	6.82953	-17.3236	2.48275e-61	1.00717e-59	128.613	protein_coding		CD1D	0.50144	4.57517	13.6995	2.70659e-40	1.09591e-38	80.6257	protein_coding		KCND2	0.260566	3.1635	13.5756	1.22216e-39	4.81338e-38	79.0734	protein_coding		TCIRG1	0.376279	8.0207	9.85693	3.06943e-22	1.2475e-20	39.5293	protein_coding		TIMM8A	0.400076	4.8892	17.9896	2.64843e-61	1.07843e-59	128.653	protein_coding		GIMAP1	-0.310641	4.71686	-18.1636	8.59034e-63
CCL19	-1.01151	5.9991	-17.3191	2.64699e-61	1.07178e-59	128.549	protein_coding		SLC25A34	0.256391	5.09434	13.6792	3.46777e-40	1.4015e-38	80.3799	protein_coding		EID1	0.458542	8.29316	13.5482	1.70468e-39	6.70155e-38	78.7431	protein_coding		CEP76	0.471186	6.61668	9.8338	3.80894e-22	1.54516e-20	39.3163	protein_coding		CDC45	0.663874	6.9973	17.9858	2.78036e-61	1.13002e-59	128.605	protein_coding		KCNJ8	-0.700164	5.70643	-18.1626	8.69666e-63
ARMCX1	-0.865368	6.41108	-17.3066	3.16973e-61	1.28104e-59	128.37	protein_coding		HSF2	-0.400451	5.46494	-13.6782	3.50937e-40	1.41566e-38	80.3681	protein_coding		CLIP4	0.421175	4.79215	13.5345	2.01186e-39	7.89481e-38	78.5787	protein_coding		IQGAP3	0.206005	5.40366	9.83058	3.92497e-22	1.58924e-20	39.2867	protein_coding		TNFRSF17	-1.53265	4.90012	-17.9655	3.62086e-61	1.46886e-59	128.342	protein_coding		THBS3	-0.561883	6.81694	-18.1625	8.71445e-63
PKD2	-0.75212	6.75588	-17.2997	3.50147e-61	1.41248e-59	128.271	protein_coding		MIS18BP1	-0.37348	4.96092	-13.6733	3.72608e-40	1.50028e-38	80.3087	protein_coding		ELOVL4	0.24674	3.80812	13.5168	2.49264e-39	9.74608e-38	78.3661	protein_coding		KLHL6	0.267243	4.29411	9.81779	4.42134e-22	1.78688e-20	39.1693	protein_coding		GSTCD	0.341399	5.86261	17.9599	3.89113e-61	1.57554e-59	128.27	protein_coding		GALNT15	-0.469451	4.33537	-18.1615	8.82721e-63
FLNA	-0.829441	8.61647	-17.2805	4.61851e-61	1.85962e-59	127.995	protein_coding		DPH6	-0.297326	4.57848	-13.672	3.78503e-40	1.52119e-38	80.2931	protein_coding		RSPO3	0.945305	5.67048	13.495	3.24434e-39	1.26623e-37	78.1045	protein_coding		NDST2	0.133047	5.93153	9.81327	4.61146e-22	1.86024e-20	39.1278	protein_coding		SIGLEC7	-0.286535	5.66538	-17.9521	4.30233e-61	1.73878e-59	128.17	protein_coding		SPP1	-1.3909	6.41133	-18.1603	8.97045e-63
TREM2	-0.484118	6.60025	-17.278	4.79185e-61	1.92582e-59	127.958	protein_coding		DPEP2	0.328256	4.92449	13.6668	4.035e-40	1.61681e-38	80.2297	protein_coding		EVC	0.168088	5.13687	13.4926	3.33877e-39	1.30074e-37	78.0761	protein_coding		STMN2	-0.577955	5.16549	-9.80069	5.18357e-22	2.08713e-20	39.0124	protein_coding		HOOK1	0.770012	7.55131	17.9451	4.71057e-61	1.90022e-59	128.08	protein_coding		PTPN14	-0.55154	5.62184	-18.1377	1.20858e-62
PTPRM	-0.569869	6.92097	-17.2725	5.18234e-61	2.0789e-59	127.88	protein_coding		PSMC3IP	-0.28953	6.54151	-13.6667	4.03792e-40	1.61681e-38	80.229	protein_coding		GLIS3	0.536256	4.78551	13.4672	4.53343e-39	1.76298e-37	77.7726	protein_coding		PLAT	-0.625025	8.20794	-9.79549	5.44003e-22	2.18633e-20	38.9648	protein_coding		TRIM24	0.575481	6.70788	17.9373	5.21313e-61	2.09904e-59	127.979	protein_coding		EML1	-0.872092	4.90235	-18.1345	1.26196e-62
ZFYVE1	-0.270823	6.60315	-17.2485	7.32986e-61	2.93493e-59	127.535	protein_coding		ATP8B2	0.43604	6.19273	13.6639	4.17986e-40	1.66748e-38	80.1948	protein_coding		WBP1L	0.324501	8.40031	13.4637	4.73313e-39	1.83734e-37	77.7298	protein_coding		LYG1	0.282434	5.57418	9.79477	5.47679e-22	2.19701e-20	38.9581	protein_coding		TSHZ3	-0.615539	5.63899	-17.9194	6.57845e-61	2.64385e-59	127.748	protein_coding		SCG2	-1.01864	5.11456	-18.1274	1.38529e-62
IGFBP3	-0.829899	9.13804	-17.2471	7.47328e-61	2.98683e-59	127.516	protein_coding		CD6	0.157927	5.08491	13.6639	4.17988e-40	1.66748e-38	80.1948	protein_coding		RBPMS2	0.53281	5.35134	13.4613	4.87244e-39	1.88803e-37	77.701	protein_coding		BUD13	0.204639	7.30192	9.79165	5.63747e-22	2.25728e-20	38.9296	protein_coding		BTN3A1	-0.47222	7.34252	-17.9149	6.96671e-61	2.7947e-59	127.691	protein_coding		ANK2	-0.376359	4.08206	-18.1253	1.42465e-62
SECTM1	-0.749552	7.38258	-17.2421	8.03553e-61	3.20561e-59	127.444	protein_coding		ST6GALNAC6	0.595087	6.55446	13.6533	4.7532e-40	1.88922e-38	80.0673	protein_coding		GAS7	0.366618	5.96832	13.4319	6.93928e-39	2.6841e-37	77.3501	protein_coding		CD27	0.462622	6.40978	9.78701	5.88614e-22	2.3525e-20	38.887	protein_coding		CSE1L	0.628049	8.82058	17.9103	7.39918e-61	2.96269e-59	127.631	protein_coding		ZCCHC24	-1.04038	7.67553	-18.1218	1.49233e-62
SYNC	-0.816651	4.97715	-17.2076	1.31964e-60	5.25473e-59	126.95	protein_coding		TCF21	0.491062	5.43494	13.643	5.39144e-40	2.13529e-38	79.9424	protein_coding		ATXN1	0.303963	5.76471	13.4165	8.3507e-39	3.22426e-37	77.1664	protein_coding		CDCA8	0.332549	8.26245	9.77618	6.50815e-22	2.5963e-20	38.788	protein_coding		CD69	-1.31041	4.90338	-17.909	7.52104e-61	3.00591e-59	127.614	protein_coding		FYN	-0.929474	6.53642	-18.1002	1.98374e-62
TNFSF4	-0.81363	5.71228	-17.2013	1.4446e-60	5.74175e-59	126.86	protein_coding		AMMECR1	-0.389653	6.4252	-13.643	5.39204e-40	2.13529e-38	79.9423	protein_coding		CERCAM	0.292797	6.29162	13.3867	1.19486e-38	4.6052e-37	76.8109	protein_coding		LAX1	0.316023	5.54868	9.77267	6.72343e-22	2.67724e-20	38.7559	protein_coding		GABARAP	-0.434448	10.9943	-17.8706	1.23551e-60	4.92883e-59	127.12	protein_coding		LINC01094	-0.637933	3.96572	-18.0969	2.07258e-62
ANKRD44	-0.318788	4.69451	-17.1984	1.50673e-60	5.97772e-59	126.818	protein_coding		LRRC25	0.465365	6.10083	13.6423	5.43363e-40	2.14782e-38	79.9346	protein_coding		GPNMB	0.924528	6.7615	13.3787	1.31469e-38	5.05805e-37	76.7161	protein_coding		P2RX7	0.307673	4.76785	9.77101	6.82734e-22	2.70864e-20	38.7408	protein_coding		ADAT2	0.587318	5.75625	17.8629	1.36562e-60	5.43781e-59	127.02	protein_coding		MEDAG	-0.388656	5.48352	-18.0808	2.56214e-62
CDC25A	0.494693	6.14148	17.1938	1.60799e-60	6.36775e-59	126.753	protein_coding		CDC25C	-0.307504	5.41795	-13.6373	5.77536e-40	2.27874e-38	79.8742	protein_coding		CALHM2	0.437015	6.53446	13.3675	1.50284e-38	5.77163e-37	76.5834	protein_coding		LEPROTL1	0.313753	8.43241	9.76806	7.01708e-22	2.77881e-20	38.7137	protein_coding		BRIX1	0.515163	7.42328	17.8618	1.38557e-60	5.50711e-59	127.006	protein_coding		MEIS2	-1.38947	6.44032	-18.0495	3.87225e-62
IL2RA	-0.319437	5.32179	-17.1822	1.89963e-60	7.50892e-59	126.588	protein_coding		SELL	0.845912	6.0298	13.6288	6.40763e-40	2.5236e-38	79.7712	protein_coding		DIXDC1	0.226912	5.65059	13.3557	1.73235e-38	6.6413e-37	76.4424	protein_coding		DTL	0.426307	7.68665	9.76174	7.44024e-22	2.941e-20	38.656	protein_coding		OLFML1	-0.809964	5.72469	-17.8568	1.47642e-60	5.85748e-59	126.943	protein_coding		CPQ	-0.715365	6.7642	-18.049	3.90133e-62
PDGFC	-0.872771	6.74254	-17.1804	1.94926e-60	7.69103e-59	126.562	protein_coding		ENOPH1	-0.340759	9.74274	-13.6259	6.63855e-40	2.60979e-38	79.7361	protein_coding		LRRN4CL	0.489243	5.1557	13.3338	2.25147e-38	8.61617e-37	76.1823	protein_coding		ARNTL2	0.417011	6.59652	9.75374	8.01179e-22	3.16115e-20	38.583	protein_coding		LYL1	-0.376395	6.90861	-17.8523	1.5665e-60	6.20344e-59	126.884	protein_coding		EDIL3	-0.551813	6.04773	-18.0391	4.445e-62
CCR7	-0.640523	5.84562	-17.1722	2.19298e-60	8.63692e-59	126.445	protein_coding		CYGB	0.31568	6.74383	13.6242	6.77707e-40	2.65941e-38	79.7156	protein_coding		S1PR1	0.396319	5.66158	13.3269	2.44588e-38	9.34362e-37	76.1001	protein_coding		WDR35	-0.290945	5.98308	-9.75263	8.09502e-22	3.18817e-20	38.5728	protein_coding		MAGOHB	0.450817	5.51336	17.8459	1.69968e-60	6.71854e-59	126.803	protein_coding		CD37	-0.357198	4.93861	-18.0257	5.30077e-62
NRP2	-0.315034	5.13428	-17.1657	2.40836e-60	9.46792e-59	126.351	protein_coding		TMA16	-0.563995	5.28964	-13.6044	8.62553e-40	3.37254e-38	79.4765	protein_coding		INMT	0.418109	5.56895	13.3128	2.89245e-38	1.10301e-36	75.9337	protein_coding		PRC1	0.426713	8.88679	9.74103	9.01144e-22	3.54264e-20	38.467	protein_coding		LRPPRC	0.530221	8.55898	17.8393	1.85203e-60	7.30742e-59	126.717	protein_coding		CNTN4	-0.497689	4.32391	-18.0221	5.55765e-62
VAMP5	-0.322321	5.68347	-17.1604	2.59964e-60	1.02014e-58	126.275	protein_coding		LRPPRC	-0.373801	8.5203	-13.6027	8.79946e-40	3.43433e-38	79.4567	protein_coding		UACA	0.266638	6.0876	13.305	3.17485e-38	1.20857e-36	75.8413	protein_coding		MPHOSPH9	0.314854	5.64483	9.73785	9.28053e-22	3.64181e-20	38.438	protein_coding		RBL1	0.450564	4.74133	17.8271	2.16833e-60	8.53983e-59	126.56	protein_coding		CFL2	-1.02658	5.80991	-18.0165	5.98779e-62
LMO2	-0.300801	5.33012	-17.1568	2.73689e-60	1.07205e-58	126.224	protein_coding		ACTR6	-0.272858	6.07159	-13.597	9.43448e-40	3.67554e-38	79.3876	protein_coding		RBFOX2	0.22442	7.12977	13.3026	3.26796e-38	1.24182e-36	75.8126	protein_coding		EPAS1	-0.33942	7.85436	-9.73127	9.86191e-22	3.86294e-20	38.3781	protein_coding		SGK1	-1.00067	8.95022	-17.8255	2.2121e-60	8.69637e-59	126.54	protein_coding		CILP	-0.941869	5.87974	-18.015	6.10656e-62
CTHRC1	-1.32765	9.5346	-17.1503	3.00462e-60	1.17479e-58	126.131	protein_coding		PUS1	-0.365634	7.67853	-13.595	9.66115e-40	3.75708e-38	79.364	protein_coding		PCSK5	0.572395	5.03508	13.3011	3.32743e-38	1.2622e-36	75.7947	protein_coding		ADAM33	-0.232313	5.93505	-9.72587	1.03669e-21	4.05339e-20	38.3288	protein_coding		EMILIN1	-0.92517	6.53621	-17.8243	2.24921e-60	8.8262e-59	126.524	protein_coding		HLA-DPA1	-1.12151	8.43403	-18.0117	6.37515e-62
SH3BP5	-0.559711	7.68514	-17.1498	3.02586e-60	1.18096e-58	126.124	protein_coding		GART	-0.274042	5.96616	-13.592	1.00211e-39	3.89007e-38	79.3278	protein_coding		MEDAG	0.279984	5.50274	13.2723	4.6889e-38	1.77554e-36	75.4544	protein_coding		MCAT	0.285904	7.57681	9.72431	1.05169e-21	4.10463e-20	38.3147	protein_coding		ENG	-0.502234	6.56674	-17.8228	2.29146e-60	8.97573e-59	126.505	protein_coding		DIP2C	-0.658786	6.67872	-17.9914	8.32691e-62
CYP1B1	-0.908915	4.93131	-17.1471	3.14528e-60	1.22535e-58	126.086	protein_coding		DNMT1	-0.397445	8.96851	-13.5903	1.02257e-39	3.96236e-38	79.3077	protein_coding		ARL10	0.141244	5.05148	13.2622	5.29295e-38	2.00077e-36	75.3342	protein_coding		CYP27B1	0.330701	5.53945	9.71907	1.10378e-21	4.30018e-20	38.267	protein_coding		WDHD1	0.693358	4.60131	17.8146	2.54604e-60	9.95489e-59	126.4	protein_coding		GPR183	-0.882878	6.30093	-17.9815	9.48901e-62
RSPO3	-1.03532	5.67048	-17.1429	3.33872e-60	1.29838e-58	126.026	protein_coding		ZNHIT6	-0.291762	5.82888	-13.5901	1.02497e-39	3.96456e-38	79.3054	protein_coding		FRMD4A	0.239383	5.06828	13.2584	5.53416e-38	2.0883e-36	75.29	protein_coding		ZNF232	0.394459	7.36785	9.7155	1.14072e-21	4.43609e-20	38.2345	protein_coding		MFAP5	-1.33513	5.06298	-17.8128	2.60632e-60	1.01722e-58	126.377	protein_coding		SPSB1	-0.577522	6.6481	-17.9792	9.78013e-62
NID2	-0.79169	7.65824	-17.1393	3.51735e-60	1.36539e-58	125.974	protein_coding		THOC2	-0.426692	7.8682	-13.5852	1.0884e-39	4.20239e-38	79.2459	protein_coding		CD109	0.550466	5.38758	13.2176	8.99249e-38	3.38738e-36	74.8084	protein_coding		RAB33A	0.179503	4.17992	9.71081	1.19119e-21	4.62405e-20	38.1918	protein_coding		KIF2C	0.662008	7.67834	17.8119	2.63695e-60	1.02732e-58	126.365	protein_coding		GPX3	-1.28819	7.21201	-17.9672	1.14478e-61
ANXA5	-0.532397	10.4155	-17.1305	3.99136e-60	1.54662e-58	125.849	protein_coding		ACTL6A	-0.389116	9.21159	-13.5832	1.11455e-39	4.2957e-38	79.2223	protein_coding		CDKN1C	0.607715	6.19242	13.2133	9.4662e-38	3.55962e-36	74.7574	protein_coding		FBXO5	0.363005	6.98531	9.70936	1.20725e-21	4.67799e-20	38.1786	protein_coding		PLA2G7	-0.995113	6.55359	-17.8069	2.81406e-60	1.09435e-58	126.301	protein_coding		KLHL5	-0.796794	5.59273	-17.9667	1.15337e-61
STON1	-0.533547	5.18992	-17.1215	4.54189e-60	1.75679e-58	125.72	protein_coding		SLBP	-0.340224	9.54668	-13.5732	1.25952e-39	4.84577e-38	79.1011	protein_coding		BCHE	0.835616	3.72831	13.2096	9.89589e-38	3.71474e-36	74.7134	protein_coding		MRPL44	0.267491	7.13426	9.70675	1.23657e-21	4.78303e-20	38.155	protein_coding		PREX1	-0.558572	6.45438	-17.8055	2.86347e-60	1.11156e-58	126.283	protein_coding		CERCAM	-0.398526	6.27626	-17.9515	1.40834e-61
MT2A	-0.796332	10.686	-17.0966	6.48623e-60	2.49992e-58	125.365	protein_coding		RFX7	-0.446835	6.35362	-13.5724	1.27163e-39	4.8837e-38	79.0916	protein_coding		RCAN2	0.660824	6.43286	13.2066	1.02512e-37	3.84143e-36	74.6784	protein_coding		IFIT2	0.45573	6.28685	9.70167	1.29585e-21	5.00338e-20	38.1088	protein_coding		GABARAPL1	-0.588168	6.62767	-17.7891	3.54089e-60	1.37206e-58	126.072	protein_coding		PABPC4L	-0.443167	4.01106	-17.9509	1.4202e-61
MFSD1	-0.387406	9.73648	-17.0869	7.45111e-60	2.86669e-58	125.227	protein_coding		BIRC5	-0.50747	7.50062	-13.5653	1.3854e-39	5.31119e-38	79.0066	protein_coding		SOX7	0.450469	4.42758	13.1971	1.14701e-37	4.29078e-36	74.5669	protein_coding		FANCE	0.244196	6.55779	9.69521	1.3754e-21	5.30104e-20	38.05	protein_coding		CXCR4	-1.3485	8.08896	-17.7868	3.64738e-60	1.4108e-58	126.042	protein_coding		ZNF542P	-0.480917	3.96944	-17.9359	1.72866e-61
RHOJ	-0.372193	5.05299	-17.0815	8.04483e-60	3.08962e-58	125.151	protein_coding		FEZ1	0.356993	5.69306	13.5541	1.58636e-39	6.07085e-38	78.8723	protein_coding		PTTG1IP	0.298866	11.2023	13.188	1.27856e-37	4.77461e-36	74.4592	protein_coding		TPGS2	0.163801	6.22625	9.69361	1.39573e-21	5.36984e-20	38.0356	protein_coding		KIAA1958	0.514228	6.48587	17.7837	3.797e-60	1.46605e-58	126.002	protein_coding		CHRDL1	-1.41665	5.6709	-17.9333	1.78936e-61
COL1A2	-1.01991	10.4623	-17.0724	9.16036e-60	3.5118e-58	125.022	protein_coding		ESCO2	-0.238546	4.02116	-13.5363	1.96945e-39	7.52357e-38	78.6579	protein_coding		TGFB3	0.236883	5.10184	13.1687	1.60778e-37	5.99371e-36	74.2319	protein_coding		AOC1	-0.728404	9.5779	-9.68748	1.47673e-21	5.67136e-20	37.98	protein_coding		PDLIM3	-0.600152	5.44628	-17.7701	4.52365e-60	1.7435e-58	125.828	protein_coding		FKBP7	-0.528802	5.21594	-17.9248	2.00165e-61
PDPN	-0.460043	5.62411	-17.0661	1.0038e-59	3.83464e-58	124.931	protein_coding		DDX18	-0.290125	9.07177	-13.5331	2.0461e-39	7.8026e-38	78.62	protein_coding		TPM1	0.336629	8.25521	13.1666	1.64716e-37	6.12993e-36	74.2079	protein_coding		EXO1	0.374994	6.81616	9.68427	1.521e-21	5.83105e-20	37.9508	protein_coding		CKS2	0.696759	10.4668	17.7575	5.31954e-60	2.0466e-58	125.667	protein_coding		PEA15	-0.592993	9.00342	-17.9247	2.00221e-61
MOB3A	-0.284939	6.73046	-17.056	1.15868e-59	4.41851e-58	124.788	protein_coding		CENPH	-0.600142	7.07999	-13.5241	2.28167e-39	8.68562e-38	78.512	protein_coding		GLIPR1	0.614342	6.48188	13.1661	1.65757e-37	6.15807e-36	74.2017	protein_coding		CLEC4E	0.210198	5.06587	9.68172	1.55719e-21	5.95923e-20	37.9276	protein_coding		NUP37	0.404813	7.74317	17.7569	5.36428e-60	2.06015e-58	125.658	protein_coding		TPSAB1	-0.774302	6.60459	-17.9108	2.40534e-61
PTGIS	-0.484083	5.067	-17.0552	1.17277e-59	4.46436e-58	124.776	protein_coding		ANKRD35	0.33716	5.34236	13.5229	2.31459e-39	8.79546e-38	78.4978	protein_coding		LTBP3	0.296859	6.76509	13.1563	1.86033e-37	6.8995e-36	74.0872	protein_coding		IYD	-0.541098	5.44037	-9.67927	1.59259e-21	6.08393e-20	37.9055	protein_coding		OTUD6B	0.875748	7.05648	17.7561	5.42044e-60	2.07803e-58	125.648	protein_coding		SOX11	-0.510157	4.23528	-17.895	2.95904e-61
KLHDC8B	-0.430817	6.80642	-17.0488	1.28436e-59	4.88055e-58	124.685	protein_coding		DDX19A	-0.213302	5.96531	-13.5188	2.43359e-39	9.21526e-38	78.4481	protein_coding		DAAM2	0.382302	5.96661	13.1529	1.93835e-37	7.17654e-36	74.0464	protein_coding		IRF7	0.46495	7.62283	9.6778	1.61435e-21	6.15618e-20	37.8921	protein_coding		PTGIS	-0.569869	4.96399	-17.7531	5.63143e-60	2.15509e-58	125.61	protein_coding		CRIP2	-0.796595	6.80797	-17.8625	4.53397e-61
COL6A1	-0.353795	6.00479	-17.0448	1.36089e-59	5.16231e-58	124.628	protein_coding		CORO1A	0.619579	7.62395	13.5097	2.71559e-39	1.02651e-37	78.3394	protein_coding		PREX2	0.147815	4.01885	13.1526	1.94403e-37	7.18526e-36	74.0435	protein_coding		ZNF831	0.0946646	3.4066	9.67137	1.7125e-21	6.51897e-20	37.8339	protein_coding		TLR1	-0.857887	4.25412	-17.74	6.66384e-60	2.54568e-58	125.442	protein_coding		FGF7	-0.395482	3.5308	-17.8581	4.80146e-61
CALD1	-0.558735	6.57643	-17.0374	1.51228e-59	5.72653e-58	124.523	protein_coding		ANAPC7	-0.286791	7.64285	-13.5078	2.77765e-39	1.04814e-37	78.317	protein_coding		NLGN4X	0.336652	4.23119	13.1417	2.21259e-37	8.15002e-36	73.9152	protein_coding		PSMC3IP	0.21294	6.54151	9.66767	1.7718e-21	6.73282e-20	37.8003	protein_coding		BEND3	0.414766	7.05994	17.7184	8.80376e-60	3.35723e-58	125.165	protein_coding		RCAN2	-0.920138	6.38582	-17.8519	5.20974e-61
JAM3	-0.404124	5.46047	-17.0313	1.64897e-59	6.23322e-58	124.437	protein_coding		FAM76B	-0.40267	5.64551	-13.5071	2.80308e-39	1.05589e-37	78.3079	protein_coding		PPP1R18	0.560233	8.03229	13.1395	2.2705e-37	8.34909e-36	73.8895	protein_coding		NCK2	-0.284825	9.02595	-9.66307	1.84827e-21	7.01112e-20	37.7587	protein_coding		LYAR	0.579504	7.84022	17.7077	1.01053e-59	3.84679e-58	125.028	protein_coding		ACKR1	-0.965726	5.98567	-17.8472	5.54353e-61
TNFSF8	-0.241958	4.6877	-17.0223	1.87534e-59	7.06421e-58	124.309	protein_coding		TIGD2	-0.522329	6.76422	-13.5061	2.83598e-39	1.06643e-37	78.2964	protein_coding		CORIN	0.318309	4.47277	13.1323	2.47141e-37	9.07247e-36	73.8054	protein_coding		ZDHHC9	-0.356753	7.76978	-9.65561	1.97913e-21	7.49436e-20	37.6912	protein_coding		IGFBP7	-0.679208	8.75212	-17.6888	1.28993e-59	4.90173e-58	124.785	protein_coding		FGR	-0.576876	5.89876	-17.8198	7.94441e-61
TCEAL7	-0.764991	4.46617	-17.0121	2.16815e-59	8.15299e-58	124.164	protein_coding		HLA-DOA	0.230075	5.91306	13.503	2.9446e-39	1.10535e-37	78.2591	protein_coding		DCLK1	0.389309	3.75293	13.1266	2.64347e-37	9.68766e-36	73.7387	protein_coding		DEXI	-0.20658	7.59529	-9.65364	2.01525e-21	7.6178e-20	37.6734	protein_coding		FMNL1	-0.291937	4.83919	-17.6878	1.3058e-59	4.95334e-58	124.773	protein_coding		DSEL	-0.299394	3.49147	-17.8122	8.77134e-61
LGMN	-0.489644	9.45408	-17.0045	2.41806e-59	9.07696e-58	124.056	protein_coding		CKS2	-0.546389	10.4598	-13.4972	3.1592e-39	1.18385e-37	78.1894	protein_coding		HTR2A	0.186158	3.74786	13.1241	2.72253e-37	9.9605e-36	73.7094	protein_coding		CACNB3	-0.227138	7.06629	-9.65308	2.02567e-21	7.63755e-20	37.6683	protein_coding		SNRPF	0.533328	10.08	17.6869	1.3213e-59	5.00336e-58	124.761	protein_coding		SLFN11	-0.863181	5.52786	-17.7887	1.19315e-60
PLXND1	-0.332889	6.91158	-16.993	2.84854e-59	1.06744e-57	123.893	protein_coding		ZNF670	-0.465618	4.54457	-13.482	3.79554e-39	1.41985e-37	78.0074	protein_coding		DOK6	0.151533	3.85312	13.1213	2.81516e-37	1.0282e-35	73.6762	protein_coding		KMO	0.274656	4.46497	9.6529	2.02908e-21	7.63755e-20	37.6666	protein_coding		TRG-AS1	-0.47101	4.68446	-17.6777	1.48713e-59	5.62147e-58	124.643	lncRNA		TWIST2	-0.349224	4.54046	-17.7832	1.28298e-60
FILIP1L	-0.513575	6.64595	-16.9849	3.1955e-59	1.19538e-57	123.778	protein_coding		TFAM	-0.410308	6.98687	-13.4791	3.9299e-39	1.46757e-37	77.9729	protein_coding		EMP3	0.675197	7.83932	13.107	3.33246e-37	1.21508e-35	73.5089	protein_coding		CLSPN	0.114254	4.13918	9.65279	2.03108e-21	7.63755e-20	37.6657	protein_coding		PAXIP1	0.569149	7.94354	17.6573	1.93382e-59	7.29722e-58	124.382	protein_coding		TGFBR1	-0.545045	6.75829	-17.779	1.35543e-60
MYL9	-0.660802	7.16195	-16.9757	3.64471e-59	1.36107e-57	123.647	protein_coding		IMMP1L	-0.44462	6.74475	-13.4789	3.9375e-39	1.46787e-37	77.971	protein_coding		FAM13C	0.302154	3.97323	13.1066	3.34981e-37	1.21935e-35	73.5037	protein_coding		ZKSCAN1	-0.358573	8.41546	-9.64911	2.1009e-21	7.88641e-20	37.6323	protein_coding		TLR7	-0.370615	4.494	-17.653	2.04309e-59	7.69611e-58	124.327	protein_coding		EVC	-0.227109	5.12906	-17.7627	1.67673e-60
EPB41L3	-0.979091	5.50109	-16.974	3.73412e-59	1.39205e-57	123.623	protein_coding		TAF1A	-0.643651	5.67995	-13.4706	4.35461e-39	1.62058e-37	77.8712	protein_coding		MAF	0.272728	4.83722	13.1027	3.50804e-37	1.2748e-35	73.4579	protein_coding		SIGLEC10	0.297484	5.64787	9.64768	2.12851e-21	7.9762e-20	37.6195	protein_coding		ETS1	-0.563001	6.72832	-17.6508	2.10187e-59	7.90376e-58	124.299	protein_coding		PLAU	-0.958541	7.73072	-17.747	2.06027e-60
CPQ	-0.55855	6.83692	-16.9661	4.18008e-59	1.55562e-57	123.511	protein_coding		DHFR	-0.476375	7.75261	-13.4562	5.1791e-39	1.9208e-37	77.6993	protein_coding		FGD5	0.30888	6.26343	13.1009	3.58099e-37	1.29913e-35	73.4375	protein_coding		EDIL3	-0.322158	6.0452	-9.64537	2.1741e-21	8.13295e-20	37.5986	protein_coding		IL2RA	-0.373168	5.25277	-17.6482	2.17322e-59	8.15786e-58	124.266	protein_coding		NKX3-2	-0.497675	5.46151	-17.7364	2.36764e-60
HIC1	-0.302016	5.11694	-16.9496	5.28281e-59	1.95926e-57	123.278	protein_coding		MS4A1	0.695818	4.50945	13.4513	5.49061e-39	2.03284e-37	77.6414	protein_coding		CNTNAP1	0.354522	5.97003	13.1001	3.6156e-37	1.30949e-35	73.428	protein_coding		TES	-0.19229	7.89989	-9.63513	2.38801e-21	8.91772e-20	37.506	protein_coding		CDCA5	0.697728	7.96613	17.6309	2.71499e-59	1.01739e-57	124.044	protein_coding		DCHS1	-0.560068	6.51204	-17.7275	2.65743e-60
LINC01094	-0.568283	4.07585	-16.9478	5.42343e-59	2.00797e-57	123.252	lncRNA		MTERF3	-0.453088	8.45313	-13.4504	5.55402e-39	2.05281e-37	77.63	protein_coding		VCAM1	0.798286	7.35199	13.0973	3.73587e-37	1.35079e-35	73.3955	protein_coding		EPM2AIP1	-0.416531	6.70282	-9.63406	2.41144e-21	8.98968e-20	37.4964	protein_coding		EXO1	0.686758	6.81682	17.5926	4.43693e-59	1.65691e-57	123.555	protein_coding		PALMD	-0.410161	4.33093	-17.7052	3.56167e-60
CYLD	-0.262892	5.69007	-16.9324	6.74633e-59	2.49349e-57	123.035	protein_coding		PXDC1	0.342695	6.63495	13.4367	6.55229e-39	2.41764e-37	77.4661	protein_coding		EGR2	0.68277	6.48052	13.0939	3.89032e-37	1.40428e-35	73.3553	protein_coding		CYTIP	0.646094	6.41464	9.63381	2.41701e-21	8.99495e-20	37.4941	protein_coding		UNC5B	-0.482724	6.88127	-17.5855	4.86412e-59	1.81331e-57	123.464	protein_coding		LILRB2	-0.502094	4.99111	-17.691	4.28703e-60
SLC2A3	-0.880129	7.14761	-16.906	9.82025e-59	3.62344e-57	122.661	protein_coding		CLC	1.10858	5.37672	13.4241	7.61775e-39	2.80121e-37	77.3168	protein_coding		DSE	0.272332	4.73691	13.0869	4.2274e-37	1.52341e-35	73.2729	protein_coding		DUSP18	-0.280219	7.26027	-9.63258	2.44441e-21	9.08129e-20	37.483	protein_coding		MRPL19	0.485844	6.23923	17.5831	5.01423e-59	1.86605e-57	123.433	protein_coding		APLNR	-0.660288	7.11651	-17.6732	5.4071e-60
TNFAIP3	-0.582604	8.67293	-16.9049	9.97614e-59	3.67469e-57	122.645	protein_coding		SKP2	-0.539896	6.80526	-13.4099	9.04174e-39	3.31919e-37	77.1469	protein_coding		DPT	0.777288	5.68102	13.0833	4.41022e-37	1.58665e-35	73.2309	protein_coding		NSMCE1	-0.252534	9.39632	-9.62327	2.66191e-21	9.87035e-20	37.399	protein_coding		LILRB3	-0.538118	7.22793	-17.579	5.28252e-59	1.96252e-57	123.381	protein_coding		COL24A1	-0.462802	3.48983	-17.6569	6.69321e-60
KLF2	-0.3713	6.63044	-16.9018	1.04264e-58	3.83403e-57	122.601	protein_coding		PHIP	-0.259535	6.3694	-13.4095	9.08041e-39	3.32774e-37	77.1427	protein_coding		AHNAK2	0.600299	6.05485	13.0747	4.88124e-37	1.75319e-35	73.1303	protein_coding		CORO1A	0.458385	7.62395	9.6231	2.66594e-21	9.87035e-20	37.3975	protein_coding		ATP2B4	-0.588616	6.58186	-17.5767	5.44469e-59	2.0193e-57	123.351	protein_coding		CLDN11	-0.394703	4.29367	-17.6539	6.95335e-60
C14orf132	-0.467509	5.47267	-16.8954	1.14124e-58	4.18944e-57	122.511	protein_coding		ACVRL1	0.451319	7.08593	13.4034	9.77092e-39	3.57474e-37	77.07	protein_coding		CRIP2	0.550249	6.86534	13.0728	4.98846e-37	1.78589e-35	73.1087	protein_coding		METTL7A	-0.246794	6.57773	-9.61516	2.86664e-21	1.05953e-19	37.3259	protein_coding		MRS2	0.41188	5.95558	17.5692	5.99509e-59	2.21962e-57	123.255	protein_coding		GPRASP1	-0.844961	5.21303	-17.6449	7.82522e-60
MXRA7	-0.507991	7.13201	-16.8912	1.21186e-58	4.44118e-57	122.452	protein_coding		NFAM1	0.224388	6.22199	13.4021	9.92463e-39	3.62484e-37	77.0545	protein_coding		PIEZO2	0.128279	4.21371	13.0728	4.98879e-37	1.78589e-35	73.1086	protein_coding		CD69	0.705758	5.18023	9.60148	3.24852e-21	1.19863e-19	37.2026	protein_coding		GAB3	-0.250699	4.72807	-17.5573	6.98652e-59	2.58226e-57	123.103	protein_coding		KCTD12	-1.27064	8.29898	-17.6404	8.30114e-60
C16orf54	-0.996662	4.51145	-16.8797	1.42629e-58	5.21816e-57	122.29	protein_coding		PNRC1	0.356498	9.70493	13.4005	1.01188e-38	3.68953e-37	77.0353	protein_coding		LIX1L	0.349275	5.88074	13.0675	5.31346e-37	1.89897e-35	73.0461	protein_coding		ACTA2	-0.3488	7.59337	-9.5945	3.46229e-21	1.27533e-19	37.1398	protein_coding		INTS7	0.445848	5.60276	17.5562	7.08527e-59	2.61429e-57	123.089	protein_coding		TLR8	-0.458009	4.45805	-17.6274	9.8268e-60
KLRB1	-0.747435	6.2846	-16.8762	1.50047e-58	5.48027e-57	122.239	protein_coding		CLIP3	0.2722	5.5402	13.3988	1.03253e-38	3.75847e-37	77.0153	protein_coding		CSRP2	0.566071	7.47198	13.0599	5.80673e-37	2.07183e-35	72.958	protein_coding		CDC42SE2	0.382396	8.20792	9.59383	3.48354e-21	1.28097e-19	37.1338	protein_coding		CYTIP	-1.24779	6.20591	-17.5425	8.44462e-59	3.11056e-57	122.914	protein_coding		PBX3	-0.783182	7.40941	-17.6215	1.06204e-59
RCN3	-0.497013	7.05088	-16.8623	1.82553e-58	6.65627e-57	122.044	protein_coding		ADH1B	0.812077	4.37298	13.3981	1.04133e-38	3.78211e-37	77.0069	protein_coding		PGM2L1	0.371928	6.33481	13.0538	6.24053e-37	2.22294e-35	72.8866	protein_coding		SLC16A4	-0.561621	5.85682	-9.59307	3.50765e-21	1.28765e-19	37.127	protein_coding		DLGAP5	0.960255	7.69455	17.5241	1.06922e-58	3.93175e-57	122.68	protein_coding		GABARAPL1	-0.568291	6.64014	-17.6048	1.31964e-59
FZD1	-0.355797	5.04108	-16.8596	1.89641e-58	6.90307e-57	122.006	protein_coding		PSPC1	-0.289663	6.4953	-13.398	1.04252e-38	3.78211e-37	77.0057	protein_coding		PALMD	0.292492	4.35348	13.0527	6.32126e-37	2.248e-35	72.8738	protein_coding		MYO1F	0.348242	6.78503	9.59177	3.5494e-21	1.30076e-19	37.1153	protein_coding		POLE2	0.765182	7.06901	17.5209	1.11378e-58	4.08866e-57	122.639	protein_coding		NREP	-0.475852	6.06178	-17.5876	1.65136e-59
FMNL1	-0.218606	4.873	-16.8572	1.96278e-58	7.13265e-57	121.972	protein_coding		DOCK2	0.327917	4.77059	13.3974	1.05024e-38	3.79738e-37	76.9984	protein_coding		OGN	0.96698	4.27004	13.0525	6.33722e-37	2.24997e-35	72.8713	protein_coding		ITGAE	0.264019	9.07944	9.59103	3.57354e-21	1.3074e-19	37.1086	protein_coding		SMC4	0.556666	7.63646	17.5088	1.29934e-58	4.76176e-57	122.485	protein_coding		IFI16	-1.03237	7.95289	-17.577	1.89667e-59
DNA2	0.562525	6.68306	16.8291	2.92514e-58	1.0612e-56	121.575	protein_coding		GAS7	0.385484	5.96832	13.3963	1.0641e-38	3.84107e-37	76.9854	protein_coding		LMCD1	0.32228	5.5123	13.033	7.96693e-37	2.82395e-35	72.6443	protein_coding		CASP2	0.323476	6.1745	9.58604	3.74001e-21	1.36599e-19	37.0637	protein_coding		CLIC6	-0.756686	5.20237	-17.5077	1.31785e-58	4.8214e-57	122.471	protein_coding		CTSO	-0.820831	7.00992	-17.5735	1.98584e-59
COL8A2	-0.525914	5.9698	-16.7964	4.64699e-58	1.68304e-56	121.114	protein_coding		TNIP1	0.28309	7.57392	13.3938	1.09699e-38	3.95317e-37	76.9553	protein_coding		ECE2	-0.184438	6.02778	-13.0264	8.6135e-37	3.04813e-35	72.5669	protein_coding		SLC18B1	0.472645	7.8393	9.58249	3.86283e-21	1.40847e-19	37.0319	protein_coding		IGFBP5	-0.652804	6.24129	-17.5011	1.43462e-58	5.23975e-57	122.387	protein_coding		YPEL5	-0.500583	9.15147	-17.551	2.66123e-59
RGS18	-0.530511	4.44932	-16.7905	5.04653e-58	1.82468e-56	121.032	protein_coding		TTC28-AS1	-0.179845	5.01356	-13.3847	1.22348e-38	4.40167e-37	76.8471	lncRNA		AQP1	0.753991	7.35105	13.0194	9.34453e-37	3.30143e-35	72.4861	protein_coding		NREP	-0.270724	6.00549	-9.57859	4.00275e-21	1.45703e-19	36.9968	protein_coding		ECT2	0.614145	6.55675	17.4931	1.59016e-58	5.79804e-57	122.284	protein_coding		EMCN	-0.70373	5.56108	-17.5469	2.80603e-59
CENPF	0.389958	5.79904	16.7613	7.62953e-58	2.74943e-56	120.621	protein_coding		NCAPD3	-0.384497	8.20851	-13.3797	1.29932e-38	4.66674e-37	76.7875	protein_coding		CHRDL1	1.01277	5.74686	13.0046	1.11232e-36	3.92342e-35	72.3132	protein_coding		OTUD4	0.149943	5.64504	9.575	4.13574e-21	1.50291e-19	36.9646	protein_coding		CLEC14A	-0.432076	6.16419	-17.4782	1.92277e-58	6.99901e-57	122.095	protein_coding		UBE2QL1	-0.56912	4.33797	-17.5469	2.80764e-59
JAZF1	-0.586745	5.39229	-16.7595	7.82026e-58	2.81347e-56	120.596	protein_coding		EFCAB11	-0.271933	5.2957	-13.3715	1.43241e-38	5.13624e-37	76.6908	protein_coding		DES	0.574061	5.04002	12.9996	1.17978e-36	4.15461e-35	72.2548	protein_coding		IHH	-0.431351	7.65617	-9.57356	4.19062e-21	1.5203e-19	36.9516	protein_coding		CCT7	0.369443	10.4277	17.4536	2.63521e-58	9.57621e-57	121.782	protein_coding		SGK1	-0.877343	8.93545	-17.4768	6.98566e-59
SUCNR1	-0.49866	5.18391	-16.7562	8.1952e-58	2.94346e-56	120.549	protein_coding		GRPEL2	-0.389915	6.30175	-13.3601	1.64299e-38	5.88156e-37	76.5548	protein_coding		CLEC5A	0.674457	4.58738	12.9937	1.26342e-36	4.44189e-35	72.1869	protein_coding		PRR3	0.240376	6.15882	9.57238	4.23565e-21	1.53406e-19	36.941	protein_coding		NEIL3	0.685069	5.57325	17.4497	2.76971e-58	1.00481e-56	121.732	protein_coding		PLXDC1	-0.452348	5.87305	-17.4565	9.09368e-59
BEX4	-1.00154	6.14938	-16.7524	8.64254e-58	3.09899e-56	120.497	protein_coding		RNASEH1	-0.275696	7.47862	-13.3592	1.6606e-38	5.93478e-37	76.5442	protein_coding		ANGPTL1	0.455122	3.72869	12.9918	1.29185e-36	4.53446e-35	72.1648	protein_coding		SGMS1	0.473971	6.99062	9.57113	4.28414e-21	1.54902e-19	36.9298	protein_coding		DPYD	-0.503346	4.54623	-17.4452	2.93458e-58	1.06284e-56	121.674	protein_coding		OLFML3	-1.1127	7.3984	-17.4194	1.47059e-58
AKR1B1	-0.70764	8.31334	-16.7474	9.27984e-58	3.31948e-56	120.426	protein_coding		SMIM13	-0.306229	5.5123	-13.3556	1.73356e-38	6.1853e-37	76.5016	protein_coding		GPR176	0.288211	5.55775	12.9756	1.56193e-36	5.47361e-35	71.9765	protein_coding		GSTA4	-0.328747	6.85368	-9.56785	4.41392e-21	1.59329e-19	36.9004	protein_coding		RBM12	0.437453	8.02459	17.4389	3.18187e-58	1.15047e-56	121.594	protein_coding		DOCK2	-0.342579	4.60691	-17.4191	1.47621e-58
SAMHD1	-0.48834	7.04989	-16.7473	9.28817e-58	3.31948e-56	120.425	protein_coding		TSR1	-0.279266	6.92292	-13.3548	1.75013e-38	6.23414e-37	76.4922	protein_coding		MAFB	0.725257	7.92314	12.9751	1.57255e-36	5.50188e-35	71.9698	protein_coding		NDNF	-0.569929	5.90772	-9.56369	4.58428e-21	1.65202e-19	36.8631	protein_coding		MNDA	-1.26401	5.7766	-17.4311	3.51289e-58	1.26804e-56	121.495	protein_coding		GMFG	-0.644296	6.84646	-17.4116	1.62857e-58
BTN3A1	-0.379911	7.41419	-16.7312	1.166e-57	4.15796e-56	120.199	protein_coding		EHD2	0.385249	7.21958	13.3398	2.0945e-38	7.43999e-37	76.3141	protein_coding		ARMC9	0.175502	4.88412	12.969	1.68731e-36	5.89387e-35	71.8999	protein_coding		KIF11	0.499107	7.49538	9.54349	5.50885e-21	1.9819e-19	36.6819	protein_coding		GINS3	0.582818	6.20485	17.4283	3.64095e-58	1.31208e-56	121.46	protein_coding		GJA5	-0.401366	4.54366	-17.3947	2.02717e-58
SPI1	-0.373341	5.10683	-16.7312	1.16728e-57	4.15796e-56	120.197	protein_coding		LIG1	-0.363399	7.53149	-13.3398	2.09553e-38	7.43999e-37	76.3136	protein_coding		POC1A	-0.309533	6.41414	-12.9626	1.8187e-36	6.34258e-35	71.8255	protein_coding		LPCAT1	0.40194	7.99174	9.54174	5.59681e-21	2.0102e-19	36.6663	protein_coding		GTPBP4	0.392236	7.76587	17.4271	3.69967e-58	1.33102e-56	121.444	protein_coding		HTR2B	-1.05675	4.12013	-17.3868	2.24546e-58
KIAA1958	0.374157	6.43335	16.7241	1.28907e-57	4.58426e-56	120.099	protein_coding		WDR75	-0.335291	8.169	-13.3332	2.2673e-38	8.03666e-37	76.2355	protein_coding		PLA2G5	0.204331	4.48663	12.9574	1.93441e-36	6.73523e-35	71.7644	protein_coding		CDC7	0.490828	6.72753	9.53786	5.79767e-21	2.07889e-19	36.6316	protein_coding		TSPYL5	-0.826535	5.19977	-17.402	5.09649e-58	1.8305e-56	121.125	protein_coding		PDLIM2	-0.345081	5.70516	-17.3854	2.28661e-58
PLN	-1.22179	5.59261	-16.7226	1.31734e-57	4.66944e-56	120.077	protein_coding		TESPA1	0.155284	4.40702	13.3326	2.28462e-38	8.0848e-37	76.228	protein_coding		PLSCR4	0.632379	7.51437	12.9434	2.27843e-36	7.92029e-35	71.602	protein_coding		C4orf46	0.428438	6.0858	9.53467	5.9678e-21	2.13635e-19	36.6031	protein_coding		PALLD	-0.66618	7.41788	-17.3944	5.61604e-58	2.01377e-56	121.028	protein_coding		MMP9	-1.22981	8.12273	-17.3778	2.52423e-58
SPSB1	-0.440303	6.69995	-16.7124	1.52073e-57	5.38155e-56	119.934	protein_coding		AURKA	-0.443812	7.35582	-13.3035	3.23516e-38	1.14112e-36	75.8831	protein_coding		LEPROT	0.25855	7.62818	12.9417	2.32467e-36	8.06806e-35	71.5821	protein_coding		IFI44	0.653478	5.91319	9.53272	6.07482e-21	2.17107e-19	36.5855	protein_coding		SLCO2A1	-0.857446	6.90768	-17.361	8.60496e-58	3.08041e-56	120.604	protein_coding		HSPB2	-0.429183	5.78452	-17.3765	2.56683e-58
CCL13	-0.390198	5.53684	-16.7112	1.54557e-57	5.4605e-56	119.918	protein_coding		CPOX	-0.37035	8.18058	-13.3005	3.35189e-38	1.18037e-36	75.848	protein_coding		FYN	0.618993	6.62089	12.941	2.34244e-36	8.1167e-35	71.5745	protein_coding		FANCI	0.345332	7.14192	9.53205	6.11144e-21	2.18055e-19	36.5796	protein_coding		STX11	-0.371571	4.36026	-17.3602	8.69689e-58	3.10817e-56	120.593	protein_coding		GPX7	-0.929276	6.19891	-17.3538	3.44209e-58
CXCL10	-1.28018	8.20341	-16.7078	1.62163e-57	5.71989e-56	119.87	protein_coding		CKAP5	-0.305893	8.66402	-13.2906	3.77099e-38	1.3258e-36	75.7312	protein_coding		CSPG4	0.294887	4.58138	12.924	2.85666e-36	9.88266e-35	71.3777	protein_coding		PTTG3P	0.253892	6.61659	9.52938	6.2617e-21	2.23049e-19	36.5557	processed_pseudogene		MRGPRF	-1.04822	5.98128	-17.3551	9.28091e-58	3.31142e-56	120.528	protein_coding		LCP1	-0.754454	7.76769	-17.3538	3.44213e-58
CD80	-0.202963	4.51584	-16.7047	1.69421e-57	5.96615e-56	119.827	protein_coding		GABARAP	0.292783	11.0368	13.2875	3.91258e-38	1.37334e-36	75.6947	protein_coding		BEX4	0.896428	6.14938	12.9161	3.13373e-36	1.08239e-34	71.2859	protein_coding		MYH11	-0.559446	6.42257	-9.52732	6.37979e-21	2.26881e-19	36.5373	protein_coding		CMTM3	-0.491101	6.3402	-17.335	1.19896e-57	4.27082e-56	120.273	protein_coding		GLIPR1	-0.853354	6.43938	-17.3284	4.78257e-58
SLAMF1	-0.207302	4.90856	-16.6698	2.76909e-57	9.71969e-56	119.338	protein_coding		CCR2	0.389714	4.50312	13.2824	4.15676e-38	1.45668e-36	75.6347	protein_coding		MRAS	0.304895	5.93715	12.909	3.40401e-36	1.17387e-34	71.2038	protein_coding		WDR41	0.218475	6.01606	9.52579	6.46846e-21	2.29657e-19	36.5236	protein_coding		GPR65	-0.770341	5.24582	-17.3319	1.24774e-57	4.43728e-56	120.234	protein_coding		HSD11B1	-0.902143	5.53527	-17.3213	5.24439e-58
RBMS3	-0.344386	4.31613	-16.6653	2.9499e-57	1.03376e-55	119.275	protein_coding		CCNF	-0.328755	6.29398	-13.2726	4.67655e-38	1.63619e-36	75.5179	protein_coding		RIMKLB	0.283306	4.34138	12.9031	3.64412e-36	1.25467e-34	71.1362	protein_coding		CSF2RB	0.663357	6.63045	9.52492	6.52013e-21	2.31112e-19	36.5158	protein_coding		SH2D3C	-0.266186	5.01946	-17.3285	1.30237e-57	4.62395e-56	120.191	protein_coding		C1QTNF3	-0.451302	5.48646	-17.3192	5.38819e-58
GATA3	-0.270929	4.48382	-16.6559	3.36846e-57	1.17853e-55	119.143	protein_coding		CHAF1A	-0.246565	6.14243	-13.2706	4.788e-38	1.67247e-36	75.4945	protein_coding		RDX	0.455934	5.08308	12.8889	4.30265e-36	1.47904e-34	70.9715	protein_coding		TACC3	0.341839	7.6033	9.51944	6.8519e-21	2.42474e-19	36.4669	protein_coding		CTSB	-0.678832	9.94454	-17.327	1.32729e-57	4.7047e-56	120.172	protein_coding		CPXM1	-0.715293	5.77671	-17.3134	5.80447e-58
SPHK1	-0.604381	6.34909	-16.6516	3.5781e-57	1.24985e-55	119.083	protein_coding		USP45	-0.37792	4.95487	-13.2654	5.09485e-38	1.77679e-36	75.433	protein_coding		PDZRN3	0.39771	5.45699	12.885	4.50409e-36	1.54441e-34	70.9261	protein_coding		CHAF1A	0.183446	6.14243	9.51843	6.91496e-21	2.44306e-19	36.4578	protein_coding		CAV1	-1.002	8.27042	-17.3245	1.37089e-57	4.8513e-56	120.14	protein_coding		TENM4	-0.531221	5.55151	-17.2825	8.65779e-58
PTPRCAP	-0.439897	6.64651	-16.6513	3.59637e-57	1.25421e-55	119.078	protein_coding		GPR180	-0.333886	4.60269	-13.2651	5.11103e-38	1.77956e-36	75.4298	protein_coding		CYP27C1	0.166385	3.2818	12.8849	4.50709e-36	1.54441e-34	70.9254	protein_coding		NCAPG	0.456976	7.11591	9.51601	7.06833e-21	2.49317e-19	36.4362	protein_coding		GBP2	-0.912889	7.42204	-17.324	1.37882e-57	4.87139e-56	120.134	protein_coding		NR2F1-AS1	-0.277187	4.19152	-17.2782	9.15811e-58
PARPBP	0.446878	4.99804	16.6379	4.3394e-57	1.51046e-55	118.891	protein_coding		AASDHPPT	-0.282043	6.58688	-13.2624	5.27841e-38	1.83431e-36	75.3979	protein_coding		ANK2	0.263138	4.10675	12.8809	4.72501e-36	1.61628e-34	70.8786	protein_coding		PAK6	0.338736	6.04872	9.50539	7.78181e-21	2.73147e-19	36.3414	protein_coding		CCL4	-1.04835	7.42512	-17.3235	1.38757e-57	4.89431e-56	120.128	protein_coding		NEGR1	-0.498055	3.88807	-17.2759	9.43109e-58
HK3	-0.353865	6.08984	-16.6378	4.34513e-57	1.51046e-55	118.89	protein_coding		IKZF1	0.17939	4.66465	13.2623	5.28523e-38	1.83431e-36	75.3966	protein_coding		A2M	0.356326	7.51736	12.8807	4.73177e-36	1.61628e-34	70.8772	protein_coding		AOC3	-0.708377	6.76064	-9.50431	7.85833e-21	2.75386e-19	36.3318	protein_coding		DONSON	0.670753	7.04854	17.3172	1.50339e-57	5.29417e-56	120.048	protein_coding		FGFR1	-0.365732	6.21122	-17.2617	1.13285e-57
ZNF667-AS1	-0.561467	5.13952	-16.6353	4.50174e-57	1.56238e-55	118.854	lncRNA		NUP62CL	-0.40862	4.83521	-13.247	6.33883e-38	2.19645e-36	75.2164	protein_coding		AL132709.8	0.29667	3.86443	12.8556	6.33809e-36	2.16155e-34	70.5873	lncRNA		RAB27B	0.458056	5.19173	9.50211	8.0168e-21	2.80484e-19	36.3121	protein_coding		PLAT	-1.07306	8.08463	-17.3166	1.51618e-57	5.32443e-56	120.04	protein_coding		MYH11	-0.984514	6.43391	-17.2538	1.25468e-57
VGLL3	-0.67797	4.48186	-16.633	4.6457e-57	1.60976e-55	118.823	protein_coding		CLIC6	0.540731	5.2518	13.242	6.72743e-38	2.32737e-36	75.1574	protein_coding		ITPR1	0.349695	5.05999	12.8474	6.97566e-36	2.37524e-34	70.4922	protein_coding		MRPL2	0.295162	7.36426	9.5019	8.03203e-21	2.80563e-19	36.3102	protein_coding		POLR2D	0.469344	6.76794	17.3165	1.5169e-57	5.32443e-56	120.039	protein_coding		TEK	-0.329015	5.72099	-17.2521	1.28222e-57
IGLJ3	-0.763227	7.14688	-16.6299	4.85774e-57	1.68054e-55	118.779	IG_J_gene		MAN2B1	0.367377	7.8627	13.2413	6.78437e-38	2.34332e-36	75.1491	protein_coding		DOCK4	0.325745	4.7191	12.8178	9.83638e-36	3.33881e-34	70.1514	protein_coding		COTL1	0.329728	7.3159	9.49937	8.2181e-21	2.86271e-19	36.2877	protein_coding		APLNR	-0.668334	7.0965	-17.3046	1.76551e-57	6.17702e-56	119.888	protein_coding		DAAM2	-0.523331	5.94477	-17.204	2.38609e-57
PCDH7	-0.465131	4.64598	-16.5933	8.11977e-57	2.80456e-55	118.267	protein_coding		NR2C1	-0.279443	5.3793	-13.2324	7.54432e-38	2.5975e-36	75.0438	protein_coding		TSPAN4	0.466974	6.83686	12.8145	1.02194e-35	3.46338e-34	70.1135	protein_coding		PLEKHS1	0.517373	4.86462	9.49931	8.22191e-21	2.86271e-19	36.2872	protein_coding		MRAS	-0.428208	5.84059	-17.3024	1.81655e-57	6.34529e-56	119.86	protein_coding		ITGA1	-0.698196	5.8032	-17.2006	2.49324e-57
CMSS1	0.459355	8.4419	16.5868	8.89198e-57	3.06639e-55	118.177	protein_coding		RIOK1	-0.362616	7.92937	-13.2176	8.99784e-38	3.08811e-36	74.8692	protein_coding		DNAJB4	0.521917	6.16047	12.7884	1.38228e-35	4.67065e-34	69.814	protein_coding		CDCP1	0.251313	6.51801	9.49677	8.41319e-21	2.9246e-19	36.2645	protein_coding		TSC22D3	-0.448855	6.34004	-17.2957	1.97919e-57	6.90227e-56	119.774	protein_coding		HLA-DMB	-0.767963	8.12281	-17.1932	2.73958e-57
GABARAPL1	-0.441502	6.69648	-16.5831	9.3624e-57	3.22347e-55	118.126	protein_coding		ORC5	-0.326015	5.84789	-13.2171	9.04937e-38	3.10088e-36	74.8635	protein_coding		TMEM204	0.258173	6.41465	12.7884	1.38249e-35	4.67065e-34	69.8138	protein_coding		NES	-0.264519	6.11247	-9.49457	8.58216e-21	2.97855e-19	36.2449	protein_coding		LINC01140	-0.310733	4.67063	-17.2885	2.16723e-57	7.54588e-56	119.684	lncRNA		CYBB	-0.374933	4.99091	-17.1883	2.91975e-57
BOC	-0.387254	6.14872	-16.5793	9.88146e-57	3.39677e-55	118.072	protein_coding		EBI3	0.303749	5.31086	13.2115	9.66988e-38	3.30826e-36	74.7978	protein_coding		FAM110B	0.194208	4.66072	12.788	1.38923e-35	4.68612e-34	69.809	protein_coding		SMTN	-0.288034	6.85987	-9.49418	8.61281e-21	2.9844e-19	36.2414	protein_coding		DSN1	0.729079	6.79806	17.2833	2.31755e-57	8.05628e-56	119.617	protein_coding		NID1	-0.566584	6.82786	-17.1875	2.94871e-57
MYO1G	-0.325979	5.79191	-16.5673	1.16899e-56	4.01204e-55	117.905	protein_coding		EVL	0.412331	6.46203	13.2041	1.05551e-37	3.60541e-36	74.711	protein_coding		MYO5A	0.297119	4.64942	12.7813	1.50043e-35	5.05333e-34	69.7326	protein_coding		FCGR2A	0.317134	5.20347	9.4893	9.00122e-21	3.11399e-19	36.1979	protein_coding		TSEN2	0.639661	6.65296	17.2805	2.40193e-57	8.33619e-56	119.582	protein_coding		TTC28	-0.458114	5.12068	-17.1709	3.65127e-57
RGS19	-0.468622	7.33624	-16.5655	1.19869e-56	4.10746e-55	117.88	protein_coding		SKA2	-0.435309	8.00451	-13.2035	1.06414e-37	3.62914e-36	74.7029	protein_coding		RASSF8-AS1	0.208594	3.72108	12.771	1.69025e-35	5.68377e-34	69.6145	lncRNA		CCNB1	0.477016	8.40042	9.48721	9.17315e-21	3.1684e-19	36.1793	protein_coding		GPC6	-0.806841	6.23338	-17.2698	2.75179e-57	9.52758e-56	119.446	protein_coding		GPR137B	-0.729957	7.37413	-17.1493	4.82457e-57
GBP4	-0.612284	5.53378	-16.5575	1.34069e-56	4.58676e-55	117.768	protein_coding		TSEN2	-0.459666	6.61321	-13.1928	1.20772e-37	4.11233e-36	74.5774	protein_coding		ABCA1	0.306485	5.71857	12.7568	1.99227e-35	6.68896e-34	69.4514	protein_coding		PTPRO	-0.408114	7.69029	-9.48368	9.47029e-21	3.26582e-19	36.1479	protein_coding		LRRC32	-0.704691	7.35892	-17.2697	2.75402e-57	9.52758e-56	119.446	protein_coding		ENG	-0.450424	6.56338	-17.1266	6.46246e-57
TCN2	-0.354861	6.69934	-16.5528	1.43205e-56	4.89158e-55	117.703	protein_coding		PSME4	-0.274364	7.20882	-13.1923	1.21404e-37	4.12736e-36	74.5723	protein_coding		FSTL3	0.411711	6.72268	12.7563	2.00513e-35	6.72169e-34	69.4451	protein_coding		DCK	0.327748	8.14421	9.4796	9.82557e-21	3.38294e-19	36.1116	protein_coding		ZWILCH	0.704162	7.95593	17.2654	2.91077e-57	1.00538e-55	119.391	protein_coding		MAN1C1	-0.578811	5.87497	-17.1203	7.00644e-57
S100A8	-0.870693	6.01702	-16.5522	1.44373e-56	4.9237e-55	117.695	protein_coding		TMEM237	-0.371316	5.69861	-13.1902	1.24575e-37	4.22851e-36	74.5467	protein_coding		BACE1	0.275731	6.4209	12.7437	2.31727e-35	7.74404e-34	69.3016	protein_coding		MYL9	-0.467728	7.16195	-9.47125	1.05951e-20	3.64207e-19	36.0373	protein_coding		PLCG2	-0.31654	4.48582	-17.2647	2.93403e-57	1.0118e-55	119.383	protein_coding		CLU	-0.853505	5.82871	-17.1185	7.16987e-57
EFS	-0.375468	5.60209	-16.5474	1.54472e-56	5.25983e-55	117.627	protein_coding		RRP15	-0.489466	6.72354	-13.1897	1.25241e-37	4.24444e-36	74.5414	protein_coding		KCNT2	0.216025	3.36841	12.7252	2.87e-35	9.57642e-34	69.0894	protein_coding		RNF34	0.169688	6.38338	9.47042	1.06743e-20	3.66349e-19	36.0299	protein_coding		CCNE2	0.924013	6.14476	17.2642	2.95405e-57	1.01708e-55	119.376	protein_coding		TXNDC15	-0.444749	8.08457	-17.1055	8.47377e-57
CTSC	-0.431323	8.2635	-16.5371	1.78382e-56	6.06441e-55	117.484	protein_coding		DCLRE1B	-0.317462	6.56308	-13.1891	1.26123e-37	4.26766e-36	74.5345	protein_coding		RNF144A	0.280069	5.34039	12.7223	2.96708e-35	9.88508e-34	69.0564	protein_coding		ZBED2	0.469096	4.44386	9.46929	1.07844e-20	3.6954e-19	36.0198	protein_coding		KIF20A	0.781423	7.4559	17.2625	3.0193e-57	1.03789e-55	119.354	protein_coding		OLFML2A	-0.722342	7.17526	-17.1028	8.77324e-57
CD40	-0.32881	6.11376	-16.4873	3.57815e-56	1.21264e-54	116.792	protein_coding		FCER1A	0.277378	4.07217	13.1861	1.30706e-37	4.41581e-36	74.4991	protein_coding		CPXM1	0.509413	5.81655	12.722	2.97711e-35	9.90323e-34	69.0531	protein_coding		NUCB2	0.358073	6.78863	9.45218	1.25824e-20	4.3047e-19	35.8678	protein_coding		NDC1	0.592432	8.35948	17.2427	3.88187e-57	1.33228e-55	119.104	protein_coding		POC1A	0.417031	6.42783	17.0958	9.59721e-57
GRN	-0.389199	9.72527	-16.486	3.6466e-56	1.23391e-54	116.773	protein_coding		NPM1	-0.283964	11.8824	-13.1804	1.39859e-37	4.71768e-36	74.432	protein_coding		IFFO1	0.350666	6.77158	12.7196	3.06172e-35	1.01691e-33	69.0253	protein_coding		CENPU	0.42338	6.88159	9.44862	1.29926e-20	4.438e-19	35.8362	protein_coding		RGS2	-1.32995	8.53908	-17.2279	4.68596e-57	1.6057e-55	118.917	protein_coding		COPZ2	-0.376968	5.92181	-17.0559	1.60334e-56
RUNX3	-0.426092	6.07234	-16.4848	3.70854e-56	1.25291e-54	116.756	protein_coding		ZNF680	-0.421383	6.69678	-13.1786	1.42983e-37	4.81553e-36	74.4101	protein_coding		MYADM	0.512602	8.64565	12.7156	3.20443e-35	1.06267e-33	68.9801	protein_coding		PLEK	0.484662	6.87886	9.44751	1.31235e-20	4.47564e-19	35.8263	protein_coding		PLXNC1	-0.518544	5.2091	-17.2068	6.12923e-57	2.09362e-55	118.649	protein_coding		PLXND1	-0.405924	6.86003	-17.0478	1.77845e-56
SGCE	-0.856009	6.05142	-16.4775	4.1039e-56	1.38432e-54	116.655	protein_coding		CCR5	0.496056	7.18843	13.1736	1.51566e-37	5.09668e-36	74.3523	protein_coding		SH3PXD2B	0.23106	6.57637	12.7069	3.54543e-35	1.17396e-33	68.8798	protein_coding		CDC42BPA	-0.196138	5.92755	-9.44259	1.37182e-20	4.6711e-19	35.7826	protein_coding		TBC1D31	0.57014	5.46478	17.2061	6.18584e-57	2.10963e-55	118.64	protein_coding		RCSD1	-0.594471	5.57041	-17.0429	1.89535e-56
ITGAX	-0.20971	5.22083	-16.4772	4.12249e-56	1.38842e-54	116.651	protein_coding		SYNPO	0.236901	6.45078	13.1714	1.55571e-37	5.22322e-36	74.3265	protein_coding		HOOK3	0.365461	5.41477	12.7067	3.5514e-35	1.17413e-33	68.8782	protein_coding		SATB1	-0.435425	5.82847	-9.4409	1.39285e-20	4.73525e-19	35.7676	protein_coding		TEK	-0.33173	5.71054	-17.2048	6.29087e-57	2.14207e-55	118.623	protein_coding		VASN	-0.47824	6.09124	-17.0404	1.95622e-56
GNAI2	-0.440768	8.48275	-16.4768	4.14433e-56	1.3936e-54	116.645	protein_coding		HSPB2	0.350832	5.81953	13.1703	1.57582e-37	5.28255e-36	74.3138	protein_coding		GJA5	0.282983	4.56819	12.7014	3.77462e-35	1.24603e-33	68.8177	protein_coding		HAUS1	0.368914	8.03233	9.44001	1.40396e-20	4.76553e-19	35.7598	protein_coding		RAD54L	0.55513	7.04295	17.1905	7.5359e-57	2.56197e-55	118.444	protein_coding		FAM110B	-0.272743	4.6455	-17.0303	2.22556e-56
CD96	-0.309844	4.20204	-16.4758	4.2023e-56	1.4109e-54	116.632	protein_coding		HS2ST1	-0.375846	6.37657	-13.1683	1.61534e-37	5.40665e-36	74.2892	protein_coding		OXNAD1	-0.297813	7.66795	-12.6996	3.85337e-35	1.27008e-33	68.7972	protein_coding		OLFML2A	-0.416354	7.14572	-9.43861	1.42181e-20	4.81857e-19	35.7474	protein_coding		PUS7L	0.546938	6.22816	17.182	8.39633e-57	2.85001e-55	118.336	protein_coding		TTC7B	-0.80236	5.59311	-17.0174	2.62934e-56
SEC14L1	-0.29734	6.41955	-16.474	4.30744e-56	1.44396e-54	116.607	protein_coding		LMNB2	-0.430384	7.93935	-13.165	1.67855e-37	5.60953e-36	74.2512	protein_coding		COL6A1	0.307137	6.00479	12.6876	4.4241e-35	1.45598e-33	68.6603	protein_coding		ME2	0.379044	8.40806	9.43795	1.43025e-20	4.83959e-19	35.7415	protein_coding		TMEM204	-0.36732	6.36877	-17.1747	9.21129e-57	3.11685e-55	118.244	protein_coding		OGN	-1.27211	4.24564	-17.0115	2.83313e-56
WDR12	0.255216	6.50639	16.4632	5.00965e-56	1.67676e-54	116.457	protein_coding		NCAPD2	-0.439421	7.70863	-13.1645	1.6885e-37	5.63406e-36	74.2453	protein_coding		PLOD2	0.618342	8.68006	12.6846	4.57866e-35	1.50456e-33	68.6262	protein_coding		PRKAR2A	-0.191054	8.73737	-9.43606	1.45475e-20	4.9148e-19	35.7248	protein_coding		NAA25	0.597422	6.47613	17.1728	9.43871e-57	3.18881e-55	118.22	protein_coding		KIF26B	-0.444497	5.11932	-17.0113	2.84267e-56
CCDC69	-0.664248	5.28804	-16.4618	5.11076e-56	1.70796e-54	116.437	protein_coding		CCR10	0.371842	4.64872	13.1606	1.76893e-37	5.89334e-36	74.1992	protein_coding		C5AR1	0.75001	6.68008	12.6611	5.99993e-35	1.96561e-33	68.3581	protein_coding		RRM2	0.443773	10.2014	9.43039	1.53084e-20	5.16377e-19	35.6745	protein_coding		KLF2	-0.480339	6.56732	-17.17	9.77791e-57	3.29312e-55	118.184	protein_coding		UMPS	0.256466	6.51773	16.9419	6.91659e-56
VWF	-0.376566	6.60015	-16.4587	5.33776e-56	1.78107e-54	116.394	protein_coding		MTBP	-0.176263	4.03957	-13.1565	1.85751e-37	6.17893e-36	74.1507	protein_coding		PTTG3P	-0.309519	6.61659	-12.6363	7.98007e-35	2.61037e-33	68.0753	processed_pseudogene		DOK2	0.259878	6.10183	9.42904	1.54961e-20	5.21895e-19	35.6625	protein_coding		XPOT	0.627455	9.10334	17.1611	1.09575e-56	3.68465e-55	118.071	protein_coding		GJC1	-0.483959	4.86968	-16.9398	7.0998e-56
SRPX	-1.05823	6.56691	-16.4582	5.37049e-56	1.78923e-54	116.387	protein_coding		BEST1	0.209865	5.89607	13.156	1.86805e-37	6.20445e-36	74.1451	protein_coding		TCEAL2	0.520801	3.70294	12.5921	1.32428e-34	4.3253e-33	67.5731	protein_coding		SLC24A3	-0.536783	6.71308	-9.42817	1.56169e-20	5.25146e-19	35.6549	protein_coding		SHE	-0.340759	5.36408	-17.1527	1.21785e-56	4.08888e-55	117.966	protein_coding		HLA-DRA	-1.2516	10.034	-16.9303	8.01833e-56
DKK3	-0.424989	5.73623	-16.4473	6.25224e-56	2.07978e-54	116.236	protein_coding		ENPP2	0.883941	7.18289	13.1513	1.974e-37	6.5463e-36	74.0905	protein_coding		CTSF	0.357879	6.77294	12.5874	1.39646e-34	4.55419e-33	67.5205	protein_coding		SRGAP1	-0.2041	5.20182	-9.42571	1.59669e-20	5.3608e-19	35.633	protein_coding		PCOLCE	-0.998862	7.95536	-17.1444	1.35294e-56	4.53537e-55	117.861	protein_coding		BACH2	-0.310961	4.14596	-16.9303	8.019e-56
CD59	-0.389383	8.87173	-16.4437	6.58048e-56	2.18331e-54	116.185	protein_coding		NCF1	0.475768	5.80712	13.1457	2.11034e-37	6.98377e-36	74.0243	protein_coding		FAM168A	0.344671	6.33595	12.5766	1.58029e-34	5.14593e-33	67.3978	protein_coding		MCPH1	0.210868	5.21164	9.42352	1.62838e-20	5.45874e-19	35.6137	protein_coding		HAPLN3	-0.437024	7.09614	-17.144	1.36151e-56	4.55706e-55	117.855	protein_coding		MICU3	-0.635189	3.37901	-16.9183	9.35371e-56
HLA-G	-0.381209	10.9021	-16.4436	6.58366e-56	2.18331e-54	116.185	protein_coding		TEX10	-0.240233	6.06477	-13.1456	2.11238e-37	6.98377e-36	74.0233	protein_coding		LDOC1	0.383807	6.05747	12.5743	1.62178e-34	5.27312e-33	67.3721	protein_coding		EPSTI1	0.597936	8.14639	9.42223	1.64736e-20	5.51383e-19	35.6022	protein_coding		SLIT2	-0.954494	5.18378	-17.1423	1.3908e-56	4.64788e-55	117.834	protein_coding		TRPV2	-0.310624	5.54689	-16.8858	1.41599e-55
GZMH	-0.666537	5.60466	-16.4389	7.03253e-56	2.3286e-54	116.119	protein_coding		C12orf29	-0.429731	7.54624	-13.1379	2.31256e-37	7.63391e-36	73.9336	protein_coding		SPSB1	0.385434	6.69995	12.5733	1.64116e-34	5.32811e-33	67.3604	protein_coding		BOC	-0.278223	6.14872	-9.42189	1.6524e-20	5.52212e-19	35.5992	protein_coding		VWF	-0.491016	6.53755	-17.1264	1.70011e-56	5.67281e-55	117.634	protein_coding		IGFBP4	-0.813335	9.30931	-16.8803	1.51937e-55
TRG-AS1	-0.369295	4.74972	-16.4302	7.93426e-56	2.62316e-54	115.999	lncRNA		GINS4	-0.270706	4.88492	-13.1366	2.34832e-37	7.74015e-36	73.9184	protein_coding		EHD3	0.180158	5.34464	12.5717	1.67088e-34	5.41646e-33	67.3426	protein_coding		SLC31A1	0.232895	6.77116	9.42107	1.66461e-20	5.55436e-19	35.592	protein_coding		GEN1	0.510591	4.66315	17.1201	1.84334e-56	6.14124e-55	117.553	protein_coding		CTSF	-0.505468	6.74319	-16.8514	2.19865e-55
GPR68	-0.249935	5.60402	-16.4176	9.45545e-56	3.12131e-54	115.825	protein_coding		MDN1	-0.286333	5.18361	-13.1365	2.35374e-37	7.74621e-36	73.9161	protein_coding		MRPL12	-0.233074	7.66263	-12.5712	1.68027e-34	5.43406e-33	67.337	protein_coding		HSH2D	0.235459	5.65272	9.41886	1.69805e-20	5.65719e-19	35.5724	protein_coding		CD3G	-0.401781	5.21544	-17.1152	1.96031e-56	6.52089e-55	117.492	protein_coding		LRRN4CL	-0.64612	5.14186	-16.8086	3.7941e-55
TINF2	-0.29789	8.19107	-16.4098	1.05413e-55	3.47444e-54	115.716	protein_coding		CENPU	-0.567538	6.88159	-13.1288	2.57805e-37	8.47152e-36	73.8258	protein_coding		ANXA5	0.456441	10.4155	12.5712	1.68134e-34	5.43406e-33	67.3364	protein_coding		UBL3	-0.334917	8.89762	-9.41705	1.7258e-20	5.74081e-19	35.5564	protein_coding		DCAF13	0.415185	6.20882	17.1146	1.97659e-56	6.56494e-55	117.484	protein_coding		E2F2	0.233422	5.64902	16.7682	6.34678e-55
P2RY10	-0.279883	4.29359	-16.3725	1.77317e-55	5.83554e-54	115.199	protein_coding		CD1E	0.251069	4.56541	13.1282	2.59512e-37	8.51467e-36	73.8193	protein_coding		SCRG1	0.280388	3.89394	12.5573	1.96893e-34	6.35405e-33	67.1798	protein_coding		JAK3	0.123001	5.01416	9.41634	1.73684e-20	5.76864e-19	35.5501	protein_coding		SELP	-0.568412	6.07177	-17.111	2.06874e-56	6.86047e-55	117.438	protein_coding		SUGCT	-0.732345	5.799	-16.7511	7.88646e-55
ST6GALNAC5	-0.400471	4.6767	-16.3693	1.85349e-55	6.0906e-54	115.155	protein_coding		RPE	-0.280161	6.83717	-13.1279	2.60285e-37	8.52708e-36	73.8164	protein_coding		ACKR3	0.352361	5.95996	12.5498	2.14657e-34	6.917e-33	67.0942	protein_coding		MCMBP	0.156502	6.33787	9.41395	1.77454e-20	5.88484e-19	35.529	protein_coding		CD38	-0.755556	5.85239	-17.0982	2.43154e-56	8.05127e-55	117.278	protein_coding		CALU	-0.475248	8.45732	-16.7359	9.57289e-55
IGKC	-0.627505	6.97635	-16.3603	2.09822e-55	6.88434e-54	115.032	IG_C_gene		HPGDS	0.422114	4.60469	13.1243	2.7174e-37	8.8889e-36	73.7737	protein_coding		HIP1	0.293323	5.09854	12.5485	2.17901e-34	7.01108e-33	67.0793	protein_coding		FECH	0.248207	5.78184	9.41026	1.83429e-20	6.07365e-19	35.4963	protein_coding		UBE3D	0.274381	3.89639	17.0963	2.49261e-56	8.22828e-55	117.253	protein_coding		BCL6	-0.598894	6.46585	-16.721	1.15683e-54
PIK3R5	-0.17571	5.02574	-16.3523	2.34567e-55	7.68455e-54	114.921	protein_coding		NOL11	-0.352334	9.16535	-13.1225	2.7752e-37	9.0617e-36	73.7528	protein_coding		YPEL5	0.349999	9.1843	12.5458	2.24642e-34	7.21725e-33	67.0491	protein_coding		HSPA14	0.218859	7.44917	9.41009	1.83718e-20	6.07394e-19	35.4948	protein_coding		CHAF1A	0.327172	6.15366	17.0911	2.66046e-56	8.76899e-55	117.188	protein_coding		PDE4DIP	-0.241161	4.15103	-16.6751	2.07296e-54
RAB33A	-0.240012	4.17992	-16.3505	2.40445e-55	7.86522e-54	114.896	protein_coding		CD4	0.207036	5.35669	13.1224	2.77861e-37	9.0617e-36	73.7516	protein_coding		DACT3	0.263134	5.43911	12.5329	2.60306e-34	8.35066e-33	66.903	protein_coding		HCK	0.488768	6.97057	9.40893	1.8564e-20	6.1281e-19	35.4845	protein_coding		ACTL6A	0.512876	9.22714	17.0897	2.70939e-56	8.91664e-55	117.17	protein_coding		CD300LF	-0.498807	5.81695	-16.6743	2.09238e-54
FHL1	-0.880698	6.80524	-16.3418	2.71588e-55	8.87051e-54	114.775	protein_coding		LAPTM5	0.783653	9.24589	13.1191	2.89e-37	9.41076e-36	73.7126	protein_coding		FBXL22	0.293808	4.30496	12.5324	2.61751e-34	8.38455e-33	66.8975	protein_coding		TPM2	-0.252744	6.16296	-9.40691	1.89028e-20	6.23042e-19	35.4667	protein_coding		RBM28	0.512116	7.92787	17.0878	2.77311e-56	9.11249e-55	117.147	protein_coding		PNRC1	-0.441108	9.63719	-16.6597	2.51888e-54
ITM2B	-0.299845	11.4705	-16.3359	2.94716e-55	9.6114e-54	114.693	protein_coding		ADAMDEC1	1.29358	8.15359	13.1181	2.92296e-37	9.5038e-36	73.7014	protein_coding		ANGPT1	0.254478	3.99915	12.5286	2.73149e-34	8.73672e-33	66.8552	protein_coding		HAUS8	0.239215	6.09322	9.4011	1.99145e-20	6.5539e-19	35.4153	protein_coding		FSTL1	-0.746554	7.47821	-17.0833	2.93605e-56	9.63327e-55	117.09	protein_coding		PAPPA	-0.352291	4.83	-16.6552	2.66896e-54
APLNR	-0.510623	7.18046	-16.3154	3.91538e-55	1.27498e-53	114.411	protein_coding		P2RX1	0.247629	6.1393	13.1162	2.98938e-37	9.70517e-36	73.6791	protein_coding		NDUFA7	-0.198631	7.39064	-12.5122	3.29354e-34	1.05189e-32	66.6697	protein_coding		SH2D2A	0.270656	6.47743	9.39334	2.1349e-20	7.01533e-19	35.3468	protein_coding		CENPL	0.539272	6.2219	17.0748	3.27088e-56	1.07156e-54	116.983	protein_coding		VAT1	-0.542616	8.81425	-16.6531	2.74095e-54
CYTH4	-0.196681	5.62633	-16.3082	4.32606e-55	1.40659e-53	114.312	protein_coding		ILF3	-0.249038	8.34273	-13.1071	3.32947e-37	1.07898e-35	73.5723	protein_coding		SERINC1	0.393679	9.62465	12.501	3.74203e-34	1.19337e-32	66.5431	protein_coding		SERPINB9	0.293263	6.19753	9.38789	2.24171e-20	7.35513e-19	35.2987	protein_coding		RGS19	-0.632155	7.26609	-17.0734	3.32908e-56	1.08898e-54	116.965	protein_coding		C8orf88	-0.679967	4.23001	-16.6438	3.08234e-54
RAD54B	0.610021	6.63667	16.3019	4.72229e-55	1.53311e-53	114.224	protein_coding		NUDCD2	-0.2639	6.32582	-13.1055	3.39482e-37	1.0972e-35	73.5531	protein_coding		MSN	0.313456	6.98721	12.4842	4.52759e-34	1.44176e-32	66.3542	protein_coding		SRSF6	0.46866	8.74379	9.38396	2.32202e-20	7.60706e-19	35.264	protein_coding		FANCD2	0.347366	4.99494	17.0647	3.71535e-56	1.21349e-54	116.856	protein_coding		RUNX2	-0.26978	5.02433	-16.6341	3.48656e-54
KCNMB1	-0.45333	4.99988	-16.2948	5.21121e-55	1.68931e-53	114.126	protein_coding		BASP1	0.445994	6.69422	13.1002	3.60974e-37	1.16492e-35	73.4922	protein_coding		IGF1	0.525652	5.29337	12.466	5.56461e-34	1.76938e-32	66.1497	protein_coding		FXN	0.233714	5.74638	9.38271	2.34808e-20	7.68081e-19	35.253	protein_coding		NCF2	-1.13666	5.92046	-17.0611	3.89128e-56	1.26904e-54	116.81	protein_coding		ALDH1A3	-0.499728	5.77119	-16.6309	3.63232e-54
THBS2	-1.32738	8.74032	-16.2903	5.54842e-55	1.79593e-53	114.064	protein_coding		GAB3	0.177394	4.74584	13.099	3.66428e-37	1.18076e-35	73.4774	protein_coding		PDGFRA	0.214745	5.34097	12.4656	5.59503e-34	1.77644e-32	66.1443	protein_coding		CDC20	0.444407	8.61619	9.37065	2.61547e-20	8.54257e-19	35.1467	protein_coding		C17orf75	0.757573	5.96102	17.058	4.04423e-56	1.31693e-54	116.771	protein_coding		RAB7B	-0.244988	4.80533	-16.6275	3.78928e-54
WDR3	0.231061	5.98995	16.2773	6.63486e-55	2.14438e-53	113.886	protein_coding		POLR1A	-0.299473	6.51662	-13.0952	3.8294e-37	1.23213e-35	73.4337	protein_coding		C3	1.04622	9.14328	12.4645	5.66097e-34	1.79474e-32	66.1327	protein_coding		BLVRA	0.281689	6.18758	9.36542	2.74066e-20	8.93793e-19	35.1006	protein_coding		CHML	0.363607	4.49166	17.0536	4.27538e-56	1.39011e-54	116.716	protein_coding		CLEC4A	-0.608483	5.37869	-16.6261	3.85892e-54
TIMP3	-0.854127	8.12147	-16.2649	7.8788e-55	2.54262e-53	113.715	protein_coding		C1QC	0.873061	8.62757	13.0848	4.33119e-37	1.39151e-35	73.3116	protein_coding		IGDCC4	0.625108	5.10696	12.4583	6.07575e-34	1.92343e-32	66.0626	protein_coding		MGLL	-0.410532	9.08151	-9.36455	2.76214e-20	8.99441e-19	35.0929	protein_coding		NUSAP1	0.712756	8.20687	17.0471	4.64169e-56	1.50695e-54	116.634	protein_coding		TMEM255A	-0.507103	3.32136	-16.6181	4.27046e-54
AURKA	0.446403	7.35582	16.2431	1.06516e-54	3.43233e-53	113.415	protein_coding		G2E3	-0.415833	6.51954	-13.08	4.58405e-37	1.47057e-35	73.2554	protein_coding		LMO3	0.223727	3.81247	12.4151	9.91457e-34	3.13411e-32	65.5771	protein_coding		KLHL3	-0.224257	5.03217	-9.36029	2.8694e-20	9.32966e-19	35.0554	protein_coding		HLA-G	-0.503261	10.841	-17.037	5.27466e-56	1.70988e-54	116.507	protein_coding		STAB1	-0.290381	5.66575	-16.6148	4.45325e-54
BIN2	-0.3796	6.93959	-16.2414	1.09049e-54	3.50872e-53	113.392	protein_coding		TYW5	-0.230801	5.83387	-13.0773	4.73078e-37	1.51539e-35	73.2242	protein_coding		FST	0.373133	5.19359	12.4087	1.06582e-33	3.36426e-32	65.5054	protein_coding		NR1H3	0.327065	6.97307	9.35838	2.91873e-20	9.46157e-19	35.0386	protein_coding		SLCO2B1	-0.554408	6.81796	-17.0285	5.87322e-56	1.90106e-54	116.4	protein_coding		TUSC3	-0.485031	4.70814	-16.5807	6.85657e-54
RAB7B	-0.209772	4.84216	-16.2384	1.1366e-54	3.65164e-53	113.35	protein_coding		GIMAP1	0.299167	4.85304	13.069	5.21749e-37	1.66636e-35	73.1271	protein_coding		NDUFA10	-0.116211	5.56676	-12.3971	1.21532e-33	3.82499e-32	65.3753	protein_coding		C1QTNF3	-0.25743	5.45854	-9.35644	2.96972e-20	9.61246e-19	35.0215	protein_coding		DDX21	0.543588	10.3832	17.0261	6.05916e-56	1.95831e-54	116.369	protein_coding		SLC39A13	-0.318858	7.07579	-16.5709	7.76082e-54
CD274	-0.48876	5.58891	-16.2378	1.14695e-54	3.67944e-53	113.341	protein_coding		TAF5L	-0.250161	6.63815	-13.0686	5.24179e-37	1.67165e-35	73.1225	protein_coding		BAK1	-0.331523	7.16782	-12.3963	1.22606e-33	3.85317e-32	65.3665	protein_coding		ANKRD44	0.220635	4.69451	9.35573	2.9887e-20	9.65946e-19	35.0153	protein_coding		SYNPO	-0.301636	6.44803	-17.0237	6.24779e-56	2.01626e-54	116.338	protein_coding		PLSCR4	-0.861104	7.48097	-16.529	1.31849e-53
LPXN	-0.315619	5.89835	-16.2103	1.67692e-54	5.37161e-53	112.964	protein_coding		MGAT1	0.308933	8.30058	13.0448	6.93322e-37	2.20781e-35	72.8454	protein_coding		LAPTM4A	0.178919	11.5651	12.3956	1.23487e-33	3.87523e-32	65.3594	protein_coding		CCR1	0.425333	6.39494	9.34845	3.18934e-20	1.02925e-18	34.9512	protein_coding		PNPT1	0.582076	9.17957	17.0214	6.43214e-56	2.07266e-54	116.309	protein_coding		KANK2	-0.30706	6.37459	-16.5164	1.54604e-53
LRRK2	-0.500719	4.46614	-16.2051	1.80069e-54	5.75953e-53	112.893	protein_coding		SIT1	0.329449	5.75084	13.0408	7.26858e-37	2.3112e-35	72.7985	protein_coding		CENPO	-0.211643	6.15251	-12.3908	1.30479e-33	4.08872e-32	65.3048	protein_coding		PLCB4	-0.958269	8.81376	-9.34432	3.3088e-20	1.06621e-18	34.915	protein_coding		EXOSC3	0.346688	6.26054	17.0088	7.53929e-56	2.42581e-54	116.151	protein_coding		FSTL3	-0.538269	6.7143	-16.5162	1.5503e-53
CCT6A	0.3446	10.0715	16.1908	2.19469e-54	7.0094e-53	112.696	protein_coding		HMGB3	-0.453517	8.38028	-13.0392	7.40691e-37	2.35172e-35	72.7799	protein_coding		KATNAL1	0.320901	4.97344	12.3681	1.68494e-33	5.27234e-32	65.0514	protein_coding		CD4	0.15284	5.35669	9.34004	3.43769e-20	1.1061e-18	34.8773	protein_coding		HLA-C	-0.486911	12.0425	-17.0028	8.13399e-56	2.61327e-54	116.076	protein_coding		FILIP1	-0.615097	3.88583	-16.5074	1.73289e-53
TEK	-0.256428	5.75413	-16.1507	3.81369e-54	1.21575e-52	112.146	protein_coding		ADAP2	0.369299	6.72268	13.0389	7.43851e-37	2.35829e-35	72.7756	protein_coding		C7	0.518261	4.81133	12.3639	1.76586e-33	5.51756e-32	65.0049	protein_coding		ECM1	-0.479293	7.92872	-9.3387	3.47889e-20	1.11769e-18	34.8656	protein_coding		TCEAL3	-0.782785	7.65125	-16.9974	8.70273e-56	2.79185e-54	116.008	protein_coding		ACTC1	-0.624413	6.73377	-16.4973	1.96719e-53
COL1A1	-0.714489	9.29179	-16.1506	3.81784e-54	1.21575e-52	112.145	protein_coding		GXYLT1	-0.411345	5.96443	-13.0386	7.46425e-37	2.36299e-35	72.7722	protein_coding		POPDC2	0.428193	4.83461	12.3478	2.11863e-33	6.61026e-32	64.8243	protein_coding		GPRASP1	-0.459436	5.13458	-9.33829	3.49187e-20	1.1202e-18	34.8619	protein_coding		TTC26	0.418373	4.84152	16.9967	8.77898e-56	2.81213e-54	116	protein_coding		LAMA2	-0.529087	5.17407	-16.4831	2.35461e-53
NUAK1	-0.676584	7.18802	-16.1489	3.9097e-54	1.24317e-52	112.121	protein_coding		MYO1G	0.312828	5.79191	13.029	8.35701e-37	2.64175e-35	72.6602	protein_coding		SORBS1	0.383142	6.7555	12.3298	2.59235e-33	8.07664e-32	64.6243	protein_coding		CEP128	0.147916	4.36837	9.3379	3.50399e-20	1.12242e-18	34.8585	protein_coding		LRRC8B	0.388729	5.32499	16.964	1.3268e-55	4.24379e-54	115.589	protein_coding		ALPK2	-0.537598	4.64685	-16.4637	3.00587e-53
ATP8B4	-0.384054	3.83487	-16.1362	4.65734e-54	1.47872e-52	111.947	protein_coding		GTPBP8	-0.252324	6.31915	-13.0223	9.0314e-37	2.85076e-35	72.5833	protein_coding		APOD	0.962519	6.98584	12.324	2.76775e-33	8.61068e-32	64.5594	protein_coding		FAM228B	-0.354247	6.13183	-9.33025	3.75104e-20	1.19978e-18	34.7914	protein_coding		PRIM2	0.599468	5.94919	16.9538	1.51058e-55	4.82448e-54	115.46	protein_coding		CXCR4	-1.11391	8.04156	-16.4635	3.01311e-53
KCNE4	-0.473081	4.93575	-16.121	5.73859e-54	1.81935e-52	111.74	protein_coding		URB2	-0.327869	7.02687	-13.0172	9.59978e-37	3.02575e-35	72.5228	protein_coding		CDC42EP3	0.447504	6.97685	12.3233	2.78989e-33	8.66711e-32	64.5515	protein_coding		DPYD	0.274493	4.70483	9.32904	3.79178e-20	1.21102e-18	34.7807	protein_coding		MYLK	-0.558577	5.95833	-16.9522	1.54093e-55	4.91414e-54	115.44	protein_coding		TRIB2	-0.808668	6.4927	-16.4621	3.06673e-53
PUS1	0.358304	7.67853	16.1142	6.29887e-54	1.99406e-52	111.647	protein_coding		P2RX4	0.405103	8.31572	13.0156	9.77853e-37	3.0776e-35	72.5046	protein_coding		BDH1	-0.270715	6.67722	-12.3227	2.80788e-33	8.71046e-32	64.5451	protein_coding		FHL1	-0.634307	6.80524	-9.32544	3.91519e-20	1.24827e-18	34.7492	protein_coding		MRPL3	0.352028	11.2318	16.9469	1.64804e-55	5.248e-54	115.373	protein_coding		ECE2	0.237847	6.02957	16.4288	4.66638e-53
ASPN	-1.21858	6.93389	-16.1102	6.65706e-54	2.10437e-52	111.592	protein_coding		CKAP2	-0.259534	5.83026	-13.0123	1.01602e-36	3.19309e-35	72.4666	protein_coding		MBNL1-AS1	0.46125	5.55331	12.316	3.02984e-33	9.37213e-32	64.4697	lncRNA		RHOH	0.34322	5.33503	9.32531	3.91997e-20	1.24827e-18	34.748	protein_coding		TXNDC15	-0.475641	8.08044	-16.944	1.70837e-55	5.43211e-54	115.337	protein_coding		CDKN2B	-0.704666	5.53124	-16.4256	4.86188e-53
HLA-F	-0.499021	9.6667	-16.1076	6.90263e-54	2.17881e-52	111.556	protein_coding		USP1	-0.420068	8.9366	-13.0045	1.11335e-36	3.49388e-35	72.376	protein_coding		COL5A3	0.375603	6.31681	12.3119	3.17158e-33	9.79654e-32	64.4244	protein_coding		CAB39L	-0.558183	6.4272	-9.32471	3.94091e-20	1.25309e-18	34.7427	protein_coding		RAB31	-1.18396	8.32464	-16.929	2.06321e-55	6.55078e-54	115.149	protein_coding		TLR2	-0.646692	6.83372	-16.4076	6.0993e-53
MYLK	-0.466326	6.05403	-16.1043	7.2174e-54	2.27485e-52	111.511	protein_coding		YTHDC1	-0.189305	5.25385	-13.0042	1.11804e-36	3.50352e-35	72.3718	protein_coding		ATL1	0.548516	6.0565	12.2938	3.88501e-33	1.19831e-31	64.2232	protein_coding		ERAP1	0.232412	5.92474	9.31194	4.41494e-20	1.40176e-18	34.6308	protein_coding		URB2	0.46543	7.06102	16.9266	2.1288e-55	6.74911e-54	115.118	protein_coding		RASGRP3	-0.264447	4.72259	-16.3894	7.66801e-53
SLC24A3	-0.72847	6.71308	-16.1029	7.36038e-54	2.31654e-52	111.492	protein_coding		KBTBD6	-0.544658	5.80894	-12.9994	1.18199e-36	3.69856e-35	72.3167	protein_coding		AGTR1	0.474913	4.24857	12.2591	5.73299e-33	1.76579e-31	63.8375	protein_coding		ITGB5	-0.233115	6.97977	-9.30674	4.62409e-20	1.46601e-18	34.5852	protein_coding		NFATC1	-0.336462	5.81742	-16.9259	2.14578e-55	6.79298e-54	115.11	protein_coding		NPR3	-0.454406	4.67947	-16.3869	7.91244e-53
PXDN	-0.74514	8.02561	-16.0916	8.59669e-54	2.70171e-52	111.337	protein_coding		GCFC2	-0.367588	6.13688	-12.9983	1.19756e-36	3.74185e-35	72.3037	protein_coding		CCL2	0.859732	7.88815	12.2483	6.46902e-33	1.98966e-31	63.7178	protein_coding		SET	0.309487	11.0361	9.29862	4.96993e-20	1.57105e-18	34.5142	protein_coding		HAVCR2	-0.375987	5.37168	-16.923	2.22764e-55	7.04181e-54	115.073	protein_coding		KLF2	-0.432415	6.56476	-16.368	1.0029e-52
S1PR3	-0.427836	6.07085	-16.0886	8.96061e-54	2.81199e-52	111.296	protein_coding		RBM33	-0.178884	5.46694	-12.995	1.24535e-36	3.88558e-35	72.2649	protein_coding		NCAPH2	-0.15028	6.05483	-12.2249	8.40546e-33	2.57791e-31	63.4582	protein_coding		SH2D1B	0.0997481	3.95188	9.29659	5.06037e-20	1.5973e-18	34.4964	protein_coding		RAB3IP	0.353536	4.97433	16.9219	2.25732e-55	7.12523e-54	115.06	protein_coding		APOD	-1.32664	6.92545	-16.3539	1.19793e-52
DSCC1	0.307989	6.54553	16.0821	9.79258e-54	3.06863e-52	111.208	protein_coding		HOMER1	-0.576403	6.76191	-12.991	1.3047e-36	4.06486e-35	72.2188	protein_coding		PTN	0.31267	5.37438	12.2171	9.16965e-33	2.8083e-31	63.372	protein_coding		ZNF514	-0.46291	6.81476	-9.28958	5.385e-20	1.69729e-18	34.4351	protein_coding		MKI67	0.673184	7.79445	16.9197	2.32241e-55	7.32001e-54	115.032	protein_coding		EHD3	-0.239988	5.33831	-16.3382	1.45919e-52
MMRN2	-0.356428	4.6751	-16.081	9.94885e-54	3.11308e-52	111.192	protein_coding		PTPN4	-0.268512	4.75642	-12.9868	1.37067e-36	4.26426e-35	72.1699	protein_coding		OGFOD2	-0.182602	6.50828	-12.2058	1.04092e-32	3.17893e-31	63.2463	protein_coding		CRELD2	0.29002	9.25085	9.28467	5.62498e-20	1.77035e-18	34.3922	protein_coding		KRR1	0.378708	5.60958	16.9135	2.50952e-55	7.88674e-54	114.954	protein_coding		DIO2	-0.482083	5.77707	-16.3228	1.77083e-52
NFATC1	-0.254046	5.85774	-16.051	1.50076e-53	4.68922e-52	110.783	protein_coding		TMEM140	0.52657	6.5521	12.9852	1.39672e-36	4.33907e-35	72.1512	protein_coding		PI15	0.484514	5.03664	12.1998	1.11299e-32	3.39421e-31	63.1799	protein_coding		IL12RB2	0.142759	3.7233	9.28145	5.78806e-20	1.81903e-18	34.364	protein_coding		CTSD	-0.623937	8.20318	-16.9082	2.68214e-55	8.41702e-54	114.888	protein_coding		PILRA	-0.413819	5.12885	-16.3215	1.79911e-52
RTN1	-0.603821	4.89321	-16.031	1.97463e-53	6.16097e-52	110.51	protein_coding		CDKN3	-0.600466	8.42635	-12.9819	1.45126e-36	4.50202e-35	72.1133	protein_coding		CHST11	0.44916	5.75898	12.1907	1.23066e-32	3.74779e-31	63.0803	protein_coding		EZH2	0.426647	7.87387	9.27904	5.9127e-20	1.85551e-18	34.343	protein_coding		PPM1H	0.557047	6.12596	16.9034	2.84907e-55	8.91499e-54	114.828	protein_coding		GULP1	-0.649947	5.58971	-16.3201	1.83271e-52
TMEM204	-0.280228	6.41465	-16.0194	2.31258e-53	7.20499e-52	110.353	protein_coding		LINC01082	0.451387	5.20798	12.9808	1.46961e-36	4.55241e-35	72.1008	lncRNA		FRY	0.38322	4.89266	12.1746	1.47371e-32	4.48166e-31	62.9017	protein_coding		STAT2	0.21383	6.95985	9.27838	5.94747e-20	1.86371e-18	34.3372	protein_coding		CYTH4	-0.257533	5.59403	-16.8913	3.32222e-55	1.03805e-53	114.675	protein_coding		KLHL6	-0.308239	4.14262	-16.3111	2.04986e-52
TIGIT	-0.37399	4.82696	-16.0183	2.34865e-53	7.30682e-52	110.338	protein_coding		DHODH	-0.243115	5.15024	-12.9796	1.49136e-36	4.61319e-35	72.0863	protein_coding		PLAU	0.65193	7.8075	12.1723	1.51094e-32	4.58843e-31	62.877	protein_coding		PRIM1	0.350328	7.5875	9.27591	6.07919e-20	1.90223e-18	34.3157	protein_coding		AHCTF1	0.56798	7.14888	16.8908	3.34002e-55	1.04211e-53	114.67	protein_coding		SAMSN1	-0.618337	4.91721	-16.3087	2.11474e-52
PVRIG	-0.424976	6.03971	-16.0151	2.45444e-53	7.625e-52	110.294	protein_coding		NADK2	-0.477934	6.73016	-12.9763	1.55078e-36	4.79015e-35	72.0475	protein_coding		SLIT3	0.224642	5.08821	12.1704	1.54277e-32	4.6785e-31	62.8563	protein_coding		CD244	0.108099	4.56033	9.2728	6.24896e-20	1.95253e-18	34.2885	protein_coding		PLEKHA8	0.279084	5.23228	16.8808	3.78907e-55	1.18051e-53	114.544	protein_coding		ZNF331	-0.815169	6.26502	-16.2949	2.51415e-52
CRIP2	-0.585366	6.86534	-16.0128	2.53324e-53	7.85849e-52	110.262	protein_coding		TRUB1	-0.207207	5.2276	-12.9717	1.63609e-36	5.04192e-35	71.9945	protein_coding		CD34	0.30846	6.66651	12.1537	1.85944e-32	5.63094e-31	62.6712	protein_coding		NAA40	0.250985	6.6415	9.26952	6.43327e-20	2.00722e-18	34.2599	protein_coding		NFXL1	0.618167	7.44654	16.8711	4.28231e-55	1.33226e-53	114.423	protein_coding		RGL1	-0.619377	7.46481	-16.2908	2.64517e-52
HS3ST3B1	-0.266164	4.99877	-16.0078	2.71265e-53	8.403e-52	110.194	protein_coding		EPAS1	0.437791	7.85436	12.9716	1.63696e-36	5.04192e-35	71.9939	protein_coding		FAM171B	0.222969	4.17096	12.1532	1.86901e-32	5.65199e-31	62.6662	protein_coding		LAMA4	-0.196396	5.56198	-9.26767	6.53941e-20	2.03739e-18	34.2438	protein_coding		CD1D	-0.680406	4.54281	-16.8684	4.4296e-55	1.37611e-53	114.389	protein_coding		VWF	-0.462459	6.54315	-16.2887	2.71755e-52
COL14A1	-0.42852	5.03426	-16.0074	2.72656e-53	8.43402e-52	110.189	protein_coding		GPR183	0.696491	6.55339	12.9707	1.65518e-36	5.09081e-35	71.983	protein_coding		PLEKHH2	0.247323	3.81752	12.1347	2.2963e-32	6.93443e-31	62.4621	protein_coding		KAZN	-0.168525	5.94791	-9.26739	6.55572e-20	2.03954e-18	34.2413	protein_coding		LRRC58	0.505288	6.3651	16.8625	4.77377e-55	1.4809e-53	114.314	protein_coding		ST3GAL6	-0.276556	4.03405	-16.2853	2.83382e-52
KMO	-0.362203	4.46497	-15.9807	3.93048e-53	1.21407e-51	109.825	protein_coding		SLAMF6	0.404315	6.1298	12.9602	1.87053e-36	5.74498e-35	71.8618	protein_coding		STC1	0.56152	6.27487	12.1257	2.53632e-32	7.64858e-31	62.3636	protein_coding		PSTPIP1	0.239596	5.32178	9.26248	6.84697e-20	2.12709e-18	34.1985	protein_coding		RASGRP1	-0.940789	5.18377	-16.8429	6.10962e-55	1.88717e-53	114.069	protein_coding		ABI3BP	-0.439999	4.12524	-16.281	2.99284e-52
ILK	-0.363325	9.44801	-15.9699	4.55366e-53	1.40455e-51	109.679	protein_coding		TXLNG	-0.444541	7.23281	-12.9562	1.96101e-36	6.01433e-35	71.8149	protein_coding		ITPRIP	0.294317	5.99616	12.1136	2.90044e-32	8.72229e-31	62.2306	protein_coding		PMAIP1	0.552015	7.5941	9.25983	7.00941e-20	2.17442e-18	34.1754	protein_coding		DDX20	0.451781	6.61233	16.8289	7.28478e-55	2.24696e-53	113.894	protein_coding		NLGN4X	-0.462221	4.21113	-16.262	3.79464e-52
TGFB3	-0.249576	5.10184	-15.954	5.66052e-53	1.74347e-51	109.462	protein_coding		PUS7L	-0.38458	6.18746	-12.9542	2.0076e-36	6.14848e-35	71.7917	protein_coding		PPFIA2	0.110114	4.03532	12.1115	2.96973e-32	8.91826e-31	62.2072	protein_coding		TMEM106B	-0.277208	7.8444	-9.25643	7.22373e-20	2.2377e-18	34.1457	protein_coding		SFMBT2	-0.309245	4.91703	-16.8177	8.38526e-55	2.58271e-53	113.754	protein_coding		LMO2	-0.351371	5.27733	-16.2516	4.32187e-52
SLCO2B1	-0.411631	6.8799	-15.9487	6.08166e-53	1.87052e-51	109.391	protein_coding		XPO4	-0.409225	6.8442	-12.9423	2.3082e-36	7.05912e-35	71.6534	protein_coding		TWIST2	0.242216	4.56485	12.1078	3.09396e-32	9.27845e-31	62.1666	protein_coding		NBN	0.259905	7.28672	9.25621	7.23762e-20	2.2388e-18	34.1438	protein_coding		PDE12	0.271603	6.08701	16.8165	8.51507e-55	2.61896e-53	113.738	protein_coding		MGAT1	-0.356811	8.18768	-16.2366	5.21898e-52
CSE1L	0.425808	8.77654	15.9286	8.00823e-53	2.45957e-51	109.117	protein_coding		POLR3G	-0.286899	4.11901	-12.9397	2.37938e-36	7.26652e-35	71.6233	protein_coding		TWSG1	0.488602	7.58853	12.1073	3.11123e-32	9.31732e-31	62.1611	protein_coding		LRRC17	-0.233693	4.51964	-9.25523	7.30096e-20	2.25516e-18	34.1352	protein_coding		RASGRP3	-0.305556	4.72849	-16.8106	9.16517e-55	2.8149e-53	113.665	protein_coding		TRIM22	-1.08507	8.14935	-16.2183	6.56373e-52
IL16	-0.229136	5.49497	-15.9116	1.00858e-52	3.09327e-51	108.888	protein_coding		PPIL4	-0.489637	6.99462	-12.9301	2.65936e-36	8.1101e-35	71.5131	protein_coding		CPQ	0.466284	6.83692	12.0993	3.39965e-32	1.0167e-30	62.0732	protein_coding		TRIM7	0.387539	5.173	9.24573	7.94095e-20	2.44935e-18	34.0525	protein_coding		HPGDS	-0.591174	4.56581	-16.8063	9.66911e-55	2.96547e-53	113.612	protein_coding		PCSK5	-0.743066	5.02658	-16.2116	7.13601e-52
MFGE8	-0.497615	7.27632	-15.8971	1.22916e-52	3.76443e-51	108.691	protein_coding		MRPL3	-0.251345	11.2087	-12.9293	2.68516e-36	8.17724e-35	71.5035	protein_coding		IL12RB1	-0.182908	5.42147	-12.0983	3.4369e-32	1.02642e-30	62.0624	protein_coding		ULK1	-0.224681	6.78522	-9.23885	8.43821e-20	2.59902e-18	33.9926	protein_coding		CDC7	0.885884	6.67532	16.8047	9.87193e-55	3.02338e-53	113.591	protein_coding		NAV1	-0.410576	5.77728	-16.2081	7.45034e-52
FBXO45	0.369966	6.6088	15.892	1.31714e-52	4.02819e-51	108.622	protein_coding		PLD3	0.438795	8.2787	12.9272	2.75245e-36	8.3704e-35	71.479	protein_coding		BASP1	0.393735	6.69422	12.0949	3.57081e-32	1.06494e-30	62.0245	protein_coding		DNAJC9	0.213806	7.11377	9.23837	8.47392e-20	2.60293e-18	33.9885	protein_coding		FBLN2	-0.806639	6.25871	-16.801	1.03463e-54	3.16418e-53	113.545	protein_coding		NDUFA10	0.160507	5.57425	16.2046	7.78396e-52
LRPPRC	0.361808	8.5203	15.8915	1.3274e-52	4.05381e-51	108.615	protein_coding		PSMD14	-0.270061	10.4496	-12.9154	3.16027e-36	9.5971e-35	71.3421	protein_coding		FABP4	0.719795	4.62805	12.089	3.81042e-32	1.13483e-30	61.9602	protein_coding		GLI1	-0.282235	6.13297	-9.23836	8.47499e-20	2.60293e-18	33.9883	protein_coding		GPR34	-1.1048	5.61698	-16.7974	1.08158e-54	3.3031e-53	113.5	protein_coding		PIK3CG	-0.313534	4.20025	-16.1948	8.80159e-52
FIBIN	-0.651614	5.90381	-15.8877	1.39789e-52	4.26306e-51	108.563	protein_coding		METTL21A	-0.369989	6.27754	-12.9105	3.34542e-36	1.01451e-34	71.2856	protein_coding		GPM6B	0.487222	4.80346	12.0879	3.8581e-32	1.14745e-30	61.9478	protein_coding		EVI2B	0.655067	6.92851	9.23722	8.56077e-20	2.62554e-18	33.9784	protein_coding		CLC	-1.46185	5.332	-16.7957	1.10562e-54	3.37176e-53	113.479	protein_coding		PLD3	-0.510693	8.12402	-16.189	9.46347e-52
RACGAP1	0.448387	9.41176	15.8848	1.454e-52	4.42794e-51	108.524	protein_coding		RRP8	-0.117729	4.89387	-12.9079	3.44605e-36	1.04356e-34	71.2563	protein_coding		VGLL4	0.285093	8.6814	12.0718	4.6111e-32	1.36764e-30	61.7711	protein_coding		CEACAM5	-0.330193	9.58973	-9.23619	8.63892e-20	2.64576e-18	33.9695	protein_coding		FOLR2	-0.429957	6.3484	-16.7928	1.14573e-54	3.48915e-53	113.443	protein_coding		TCF21	-0.559168	5.36526	-16.1876	9.62962e-52
GJA1	-0.825515	8.8647	-15.8739	1.68605e-52	5.12739e-51	108.377	protein_coding		RBM12B	-0.396547	5.79545	-12.9072	3.47496e-36	1.05085e-34	71.248	protein_coding		KAZALD1	-0.197547	5.82286	-12.0683	4.79344e-32	1.41978e-30	61.7327	protein_coding		BCL2L12	0.27993	7.04127	9.23412	8.79819e-20	2.69073e-18	33.9515	protein_coding		CDC23	0.49335	6.38739	16.7926	1.14929e-54	3.49507e-53	113.44	protein_coding		CSRP2	-0.751825	7.45343	-16.18	1.05871e-51
RASL12	-0.464603	6.11767	-15.8698	1.7821e-52	5.41188e-51	108.322	protein_coding		LRCH4	0.248921	7.18136	12.9059	3.52692e-36	1.06507e-34	71.2333	protein_coding		FOXF1	0.67552	7.47254	12.0658	4.92634e-32	1.45714e-30	61.7056	protein_coding		TLE2	-0.515331	7.42101	-9.23269	8.90988e-20	2.72104e-18	33.9391	protein_coding		TMEM97	0.688916	8.95039	16.779	1.36329e-54	4.14003e-53	113.27	protein_coding		FPR1	-0.477164	5.43739	-16.1738	1.14445e-51
CXCR6	-0.375467	5.75312	-15.8688	1.80841e-52	5.48407e-51	108.307	protein_coding		VAV1	0.356324	5.65376	12.9047	3.57924e-36	1.07936e-34	71.2187	protein_coding		SPHK1	0.510904	6.34909	12.0572	5.41367e-32	1.5991e-30	61.6121	protein_coding		ANO10	-0.264184	7.90064	-9.22822	9.26884e-20	2.82269e-18	33.9001	protein_coding		UMPS	0.28624	6.51572	16.7691	1.54349e-54	4.6807e-53	113.147	protein_coding		LRRC15	-0.542913	5.76092	-16.1727	1.16049e-51
RUNX1T1	-0.324465	4.62034	-15.8596	2.04861e-52	6.2038e-51	108.183	protein_coding		CCDC18	-0.193405	4.07898	-12.9041	3.60498e-36	1.08465e-34	71.2116	protein_coding		PNMA1	0.630629	7.55035	12.0534	5.64625e-32	1.66553e-30	61.5704	protein_coding		CDC6	0.529574	6.62179	9.22676	9.38835e-20	2.85506e-18	33.8875	protein_coding		MCM4	0.582114	7.09017	16.7484	2.00116e-54	6.06009e-53	112.888	protein_coding		TSPAN2	-0.702184	4.62382	-16.1675	1.23887e-51
GLIS2	-0.648946	6.64309	-15.8573	2.11404e-52	6.39296e-51	108.152	protein_coding		HNRNPLL	-0.221899	6.52957	-12.904	3.60682e-36	1.08465e-34	71.2111	protein_coding		MAP9	0.332569	3.97363	12.0489	5.93955e-32	1.74966e-30	61.5202	protein_coding		HLA-DQB1	0.574848	5.94364	9.22612	9.44144e-20	2.86717e-18	33.882	protein_coding		DUSP1	-0.67613	7.74035	-16.7479	2.01361e-54	6.08926e-53	112.882	protein_coding		CLEC14A	-0.388381	6.16165	-16.1619	1.32859e-51
LIPA	-0.519383	9.74812	-15.857	2.12115e-52	6.4055e-51	108.148	protein_coding		PAK1IP1	-0.403297	7.6928	-12.901	3.73806e-36	1.12256e-34	71.1757	protein_coding		CNTN1	0.157056	3.73141	12.0414	6.45203e-32	1.89546e-30	61.4382	protein_coding		RIN2	-0.307895	7.26077	-9.22535	9.50632e-20	2.88283e-18	33.8752	protein_coding		COL8A2	-0.580258	5.84363	-16.7403	2.21604e-54	6.69208e-53	112.787	protein_coding		RNF150	-0.494386	4.66003	-16.1614	1.3364e-51
LDOC1	-0.419244	6.05747	-15.8535	2.2243e-52	6.70765e-51	108.101	protein_coding		HCST	0.404494	6.64648	12.9003	3.76824e-36	1.13006e-34	71.1677	protein_coding		ZNF296	-0.291963	6.06908	-12.0229	7.90505e-32	2.31917e-30	61.2369	protein_coding		NUP210	0.283518	6.57946	9.22501	9.53446e-20	2.88731e-18	33.8723	protein_coding		INTS2	0.780267	6.40761	16.7319	2.46239e-54	7.42564e-53	112.682	protein_coding		GPR65	-0.602138	5.20499	-16.154	1.46552e-51
CD248	-0.51449	8.01374	-15.8503	2.32539e-52	7.00273e-51	108.057	protein_coding		FGD2	0.151861	5.77121	12.8961	3.95593e-36	1.1847e-34	71.1195	protein_coding		CTSB	0.436383	10.1298	12.0217	8.01536e-32	2.34835e-30	61.2232	protein_coding		C2	0.340349	6.16267	9.22478	9.55389e-20	2.88915e-18	33.8703	protein_coding		TIPIN	0.815583	6.43394	16.7271	2.61584e-54	7.87738e-53	112.621	protein_coding		HOXB2	-0.778085	7.18338	-16.1511	1.52023e-51
VAT1	-0.428928	8.87281	-15.8458	2.47023e-52	7.42855e-51	107.997	protein_coding		CAMSAP1	-0.179334	4.97486	-12.8959	3.96559e-36	1.18595e-34	71.1171	protein_coding		TFAP2A-AS1	-0.296941	5.54221	-12.0206	8.1134e-32	2.37386e-30	61.2112	lncRNA		SAAL1	0.260953	7.76101	9.22219	9.77516e-20	2.95194e-18	33.8478	protein_coding		ZNF770	0.458621	5.87547	16.7145	3.06013e-54	9.20253e-53	112.465	protein_coding		RAD18	0.374232	5.51526	16.1504	1.53345e-51
COL10A1	-1.43003	6.80954	-15.842	2.60301e-52	7.81699e-51	107.945	protein_coding		PI16	0.320504	6.36089	12.8953	3.99174e-36	1.19212e-34	71.1106	protein_coding		STOM	0.392567	7.05968	12.0184	8.31318e-32	2.42902e-30	61.1871	protein_coding		ZMIZ1	-0.158402	6.49487	-9.22201	9.79035e-20	2.9524e-18	33.8462	protein_coding		SLC24A3	-0.916117	6.57958	-16.7102	3.2324e-54	9.70707e-53	112.411	protein_coding		ACTG2	-0.822817	7.07752	-16.1396	1.75318e-51
HLA-B	-0.440998	12.6126	-15.8411	2.63449e-52	7.90055e-51	107.933	protein_coding		GAPT	0.345433	3.75407	12.8919	4.15319e-36	1.23617e-34	71.0713	protein_coding		CHSY1	0.42496	8.722	12.0132	8.79604e-32	2.56318e-30	61.1311	protein_coding		GFI1	0.245166	5.29187	9.21926	1.00302e-19	3.02052e-18	33.8224	protein_coding		ADORA3	-0.468098	4.89659	-16.7064	3.38859e-54	1.0162e-52	112.364	protein_coding		CDC25C	0.359531	5.46236	16.1296	1.98656e-51
UNC5B	-0.370746	6.94316	-15.8358	2.83162e-52	8.47996e-51	107.861	protein_coding		NOC3L	-0.396469	8.48626	-12.8919	4.1564e-36	1.23617e-34	71.0705	protein_coding		GABARAPL1	0.372295	6.69648	11.9788	1.28477e-31	3.7388e-30	60.7557	protein_coding		SGCD	-0.229236	5.02535	-9.21861	1.00884e-19	3.0314e-18	33.8167	protein_coding		CLEC7A	-0.430597	4.4573	-16.7039	3.49494e-54	1.04664e-52	112.333	protein_coding		KLHDC8B	-0.488119	6.72473	-16.1232	2.15169e-51
CLEC5A	-0.714561	4.58738	-15.8346	2.87558e-52	8.59971e-51	107.846	protein_coding		CENPJ	-0.376958	5.56235	-12.8888	4.30733e-36	1.2793e-34	71.0352	protein_coding		MMP19	0.284363	6.44516	11.9767	1.31427e-31	3.81951e-30	60.7332	protein_coding		NR1I2	-0.472366	7.44071	-9.21854	1.00944e-19	3.0314e-18	33.8161	protein_coding		CCDC59	0.474714	8.68881	16.703	3.53851e-54	1.05823e-52	112.321	protein_coding		RGS1	-0.790058	6.13567	-16.121	2.21168e-51
CYS1	-0.507973	4.36971	-15.8173	3.63647e-52	1.08602e-50	107.612	protein_coding		CDCA2	-0.525108	6.53105	-12.8814	4.69273e-36	1.39186e-34	70.9503	protein_coding		CCDC102B	0.440573	4.11493	11.9559	1.65284e-31	4.79699e-30	60.506	protein_coding		LEPROT	-0.201128	7.62818	-9.2161	1.0314e-19	3.09305e-18	33.7949	protein_coding		LIX1L	-0.482522	5.77905	-16.6974	3.79287e-54	1.13273e-52	112.252	protein_coding		COL16A1	-0.878607	7.48485	-16.1108	2.51203e-51
COL4A2	-0.665609	9.34973	-15.8153	3.73769e-52	1.11471e-50	107.585	protein_coding		PACRGL	-0.32477	5.19936	-12.8759	5.00277e-36	1.48178e-34	70.8869	protein_coding		PPP1R12B	0.263524	4.92307	11.9551	1.66704e-31	4.83174e-30	60.4975	protein_coding		TCF7	-0.268242	7.47893	-9.21079	1.08078e-19	3.23237e-18	33.7488	protein_coding		STOM	-0.605951	6.92568	-16.6944	3.9389e-54	1.17472e-52	112.214	protein_coding		AQP1	-1.02024	7.31509	-16.1039	2.73707e-51
TPST1	-0.502591	6.15024	-15.8091	4.06672e-52	1.21117e-50	107.501	protein_coding		POU2F1	-0.139654	5.79909	-12.8758	5.01011e-36	1.48192e-34	70.8854	protein_coding		EBF2	0.169101	3.85724	11.9494	1.7746e-31	5.1366e-30	60.4356	protein_coding		FDXR	0.387753	6.3414	9.21079	1.08085e-19	3.23237e-18	33.7488	protein_coding		RAN	0.416641	10.7308	16.6839	4.49003e-54	1.33724e-52	112.084	protein_coding		PTGER3	-0.211998	4.22432	-16.059	4.78759e-51
IGF1	-0.577239	5.29337	-15.8071	4.18161e-52	1.24367e-50	107.473	protein_coding		LAT2	0.244046	5.6894	12.8638	5.76571e-36	1.70309e-34	70.7462	protein_coding		LAMP5	0.431456	5.33652	11.9439	1.88511e-31	5.44919e-30	60.3757	protein_coding		APP	-0.222602	9.71669	-9.20915	1.09655e-19	3.27481e-18	33.7346	protein_coding		RASGRP2	-0.250361	5.07982	-16.6803	4.69921e-54	1.39761e-52	112.038	protein_coding		BRCA1	0.445276	7.00157	16.0548	5.04553e-51
EBF1	-0.406043	4.5949	-15.8052	4.28581e-52	1.27291e-50	107.449	protein_coding		DNM1L	-0.211353	6.70113	-12.8635	5.78137e-36	1.70539e-34	70.7435	protein_coding		CCDC3	0.416944	7.79922	11.9407	1.95295e-31	5.63773e-30	60.3407	protein_coding		SALL4	-0.402051	6.54754	-9.20573	1.13003e-19	3.37014e-18	33.7049	protein_coding		GTF3C3	0.354889	5.61118	16.6768	4.90726e-54	1.45748e-52	111.995	protein_coding		CHAF1A	0.281059	6.16082	16.0384	6.19108e-51
CSGALNACT2	-0.441166	6.72405	-15.8047	4.319e-52	1.28101e-50	107.441	protein_coding		CA7	0.321656	6.16369	12.8618	5.89459e-36	1.73641e-34	70.7243	protein_coding		MAP3K7CL	0.35693	4.29686	11.94	1.96602e-31	5.6679e-30	60.3341	protein_coding		ING2	0.183152	5.59158	9.20508	1.13658e-19	3.38502e-18	33.6992	protein_coding		FCGR3B	-1.11341	6.37438	-16.6648	5.70765e-54	1.69288e-52	111.845	protein_coding		MRPS35	0.407618	10.3093	16.0343	6.51577e-51
RBMS1	-0.750458	7.78513	-15.7961	4.84825e-52	1.43601e-50	107.326	protein_coding		SHMT2	-0.475282	8.63648	-12.8532	6.51753e-36	1.91731e-34	70.6248	protein_coding		EOGT	0.553301	6.33624	11.9315	2.16028e-31	6.21966e-30	60.2407	protein_coding		CASC15	-0.105396	4.66553	-9.2046	1.14135e-19	3.39453e-18	33.6951	lncRNA		C5AR1	-1.02908	6.38918	-16.6642	5.75217e-54	1.70375e-52	111.837	protein_coding		INMT	-0.52861	5.57122	-16.0174	8.03276e-51
TIAM1	-0.384172	5.41193	-15.79	5.27147e-52	1.55923e-50	107.243	protein_coding		RRN3	-0.331924	8.25467	-12.8509	6.69691e-36	1.9674e-34	70.5979	protein_coding		ITGB1	0.1962	6.55536	11.9273	2.26193e-31	6.50365e-30	60.1952	protein_coding		CTSC	0.303609	8.2635	9.19902	1.19881e-19	3.56053e-18	33.6467	protein_coding		FILIP1L	-0.616511	6.54105	-16.6615	5.94781e-54	1.75928e-52	111.804	protein_coding		ZNF667	-0.232707	3.91508	-15.9951	1.06066e-50
DAPK1	-0.503743	5.63563	-15.7777	6.22928e-52	1.84002e-50	107.077	protein_coding		TMEM127	0.18158	7.66998	12.8472	6.98736e-36	2.04994e-34	70.5558	protein_coding		ALDH1A3	0.353153	5.80111	11.9228	2.37414e-31	6.81722e-30	60.1472	protein_coding		NAV1	-0.2341	5.72886	-9.19614	1.22958e-19	3.64691e-18	33.6218	protein_coding		SECTM1	-0.875428	7.22053	-16.6506	6.81364e-54	2.01263e-52	111.669	protein_coding		MEOX2	-0.442538	3.22235	-15.9464	1.94134e-50
TBC1D9	-0.550577	6.22367	-15.7611	7.79973e-52	2.30076e-50	106.853	protein_coding		EMP3	0.698691	7.83932	12.8419	7.43644e-36	2.17873e-34	70.4941	protein_coding		APLNR	0.434555	7.18046	11.919	2.47521e-31	7.098e-30	60.1059	protein_coding		MCM4	0.32805	7.1029	9.19005	1.29716e-19	3.8421e-18	33.5691	protein_coding		NPC2	-0.511391	10.4669	-16.6369	8.08934e-54	2.38619e-52	111.498	protein_coding		NAV3	-0.202081	3.75838	-15.9427	2.03265e-50
DENND5A	-0.544542	7.51886	-15.7436	9.87895e-52	2.91012e-50	106.618	protein_coding		YWHAQ	-0.220983	11.5074	-12.8343	8.1196e-36	2.37567e-34	70.407	protein_coding		WFDC1	0.684801	7.65386	11.9177	2.51063e-31	7.19004e-30	60.0918	protein_coding		C11orf49	-0.169855	7.14274	-9.18814	1.31918e-19	3.90195e-18	33.5525	protein_coding		BIRC5	0.642792	7.50439	16.6349	8.29817e-54	2.44445e-52	111.473	protein_coding		DTYMK	0.258091	6.00974	15.9381	2.1515e-50
PLAT	-0.802022	8.20794	-15.729	1.20413e-51	3.54228e-50	106.421	protein_coding		PIGX	-0.316002	5.91147	-12.8292	8.61019e-36	2.51241e-34	70.3489	protein_coding		FMOD	0.606917	8.38532	11.9044	2.90322e-31	8.30335e-30	59.9478	protein_coding		SCO1	0.298628	7.96655	9.18056	1.41004e-19	4.15933e-18	33.4869	protein_coding		ANK2	-0.337232	4.0546	-16.6336	8.43131e-54	2.4803e-52	111.457	protein_coding		RNF180	-0.314526	3.32837	-15.9376	2.1645e-50
MAP4K1	-0.301169	5.87245	-15.7218	1.32628e-51	3.8963e-50	106.325	protein_coding		TACC3	-0.445554	7.6033	-12.8248	9.06847e-36	2.64257e-34	70.2975	protein_coding		SH3RF3	0.421477	6.31425	11.9007	3.02393e-31	8.63717e-30	59.9075	protein_coding		SLC25A11	0.274665	7.75632	9.1786	1.43452e-19	4.22577e-18	33.4699	protein_coding		XPNPEP3	0.291789	5.66163	16.6325	8.54895e-54	2.51149e-52	111.443	protein_coding		GNAI2	-0.515964	8.40584	-15.9256	2.51195e-50
CR1	-0.253326	4.44057	-15.7154	1.44688e-51	4.24483e-50	106.238	protein_coding		KIF3A	-0.366848	5.31193	-12.8184	9.76724e-36	2.84236e-34	70.2239	protein_coding		PMEPA1	0.728858	8.95725	11.8986	3.09466e-31	8.82753e-30	59.8846	protein_coding		MTHFD1	0.260335	9.88487	9.17707	1.45388e-19	4.27698e-18	33.4567	protein_coding		UHRF1	0.785027	8.4259	16.6205	9.93392e-54	2.9144e-52	111.294	protein_coding		FGL2	-0.988748	6.79712	-15.9252	2.52274e-50
TRPS1	-0.437323	5.16134	-15.7127	1.50004e-51	4.39483e-50	106.202	protein_coding		HPRT1	-0.20966	6.39364	-12.8131	1.03808e-35	3.01686e-34	70.1635	protein_coding		ZNF512B	0.324067	4.60819	11.8982	3.10874e-31	8.85603e-30	59.8801	protein_coding		CLSTN1	-0.279978	9.44738	-9.17612	1.46613e-19	4.30715e-18	33.4485	protein_coding		CPQ	-0.721057	6.7414	-16.6178	1.02663e-53	3.00784e-52	111.261	protein_coding		SERINC1	-0.507294	9.62106	-15.9219	2.62999e-50
ERI2	0.222631	5.02174	15.7112	1.53013e-51	4.47692e-50	106.183	protein_coding		MMP28	0.472221	5.67967	12.8129	1.04022e-35	3.01902e-34	70.1615	protein_coding		NAV3	0.15642	3.76012	11.8928	3.29738e-31	9.38106e-30	59.8217	protein_coding		ZNF672	0.144157	5.84448	9.16743	1.58231e-19	4.64216e-18	33.3733	protein_coding		PIM2	-0.539423	7.0745	-16.6147	1.06811e-53	3.12512e-52	111.221	protein_coding		ESAM	-0.500089	6.24791	-15.9139	2.90338e-50
HSPE1	0.36531	10.7585	15.7036	1.69658e-51	4.95724e-50	106.08	protein_coding		CD53	0.352436	5.80188	12.8121	1.05079e-35	3.04561e-34	70.1515	protein_coding		DOK5	0.344494	5.38077	11.8905	3.38282e-31	9.61146e-30	59.7963	protein_coding		FPR3	0.501117	6.33014	9.16446	1.62412e-19	4.75837e-18	33.3477	protein_coding		HLX	-0.559082	6.43405	-16.6073	1.17141e-53	3.42274e-52	111.129	protein_coding		HSPA12B	-0.260275	4.91904	-15.9037	3.29387e-50
PRELP	-0.498068	6.21425	-15.6997	1.78713e-51	5.21476e-50	106.028	protein_coding		SNRPA1	-0.325029	8.15253	-12.8108	1.06584e-35	3.0851e-34	70.1374	protein_coding		PDLIM2	0.235209	5.73242	11.8786	3.85104e-31	1.09275e-29	59.6679	protein_coding		CXCL14	-0.763362	7.86113	-9.15733	1.72878e-19	5.05813e-18	33.2861	protein_coding		SSB	0.495744	9.33035	16.6024	1.2449e-53	3.63256e-52	111.069	protein_coding		DOK3	-0.306632	5.24391	-15.8995	3.46802e-50
ARMCX2	-0.805935	6.86071	-15.6996	1.79114e-51	5.21941e-50	106.026	protein_coding		RBAK	-0.369171	5.48989	-12.8071	1.11292e-35	3.21704e-34	70.0946	protein_coding		FGF2	0.364728	4.42908	11.873	4.09331e-31	1.15997e-29	59.6074	protein_coding		ANXA2R	0.216371	5.71233	9.15317	1.79293e-19	5.23876e-18	33.2503	protein_coding		CCL18	-1.49255	7.71367	-16.5994	1.29245e-53	3.76621e-52	111.032	protein_coding		FABP4	-0.971702	4.59507	-15.8808	4.37527e-50
HSPA12B	-0.213568	4.95218	-15.6939	1.934e-51	5.62812e-50	105.95	protein_coding		CHORDC1	-0.291731	6.25318	-12.8041	1.15281e-35	3.32791e-34	70.0597	protein_coding		CDT1	-0.407606	7.25264	-11.8552	4.9714e-31	1.40696e-29	59.4149	protein_coding		CCNF	0.235665	6.29398	9.15203	1.81108e-19	5.28463e-18	33.2403	protein_coding		MCM3	0.506219	9.3382	16.5857	1.53437e-53	4.46517e-52	110.861	protein_coding		C7	-0.677799	4.80064	-15.8789	4.47498e-50
ZNF443	0.194123	5.47803	15.687	2.12237e-51	6.16799e-50	105.857	protein_coding		SYDE1	0.21267	6.2612	12.7969	1.25304e-35	3.61244e-34	69.9771	protein_coding		PCDHB15	0.320495	3.49285	11.854	5.03394e-31	1.42279e-29	59.4025	protein_coding		GSDMD	0.238136	7.95888	9.14935	1.85406e-19	5.40275e-18	33.2172	protein_coding		TGFB3	-0.304918	5.05281	-16.5834	1.5789e-53	4.58856e-52	110.832	protein_coding		ZBTB4	-0.428891	7.8418	-15.8775	4.55575e-50
ARHGAP31	-0.235945	4.89083	-15.6836	2.22122e-51	6.44661e-50	105.812	protein_coding		HLA-DOB	0.281147	5.67956	12.7949	1.2822e-35	3.69159e-34	69.9543	protein_coding		BCL6	0.40635	6.51456	11.824	6.97585e-31	1.96908e-29	59.0792	protein_coding		CCDC92	-0.328878	8.23784	-9.14259	1.96703e-19	5.72423e-18	33.159	protein_coding		APOD	-1.29666	6.86829	-16.5781	1.68537e-53	4.89143e-52	110.767	protein_coding		TLR7	-0.26019	4.46249	-15.8562	5.93063e-50
RAB2B	-0.335406	7.70126	-15.6701	2.66601e-51	7.72713e-50	105.63	protein_coding		THAP10	-0.5234	6.97866	-12.7871	1.40307e-35	4.02883e-34	69.865	protein_coding		LCA5	0.170621	3.77045	11.8227	7.07762e-31	1.99521e-29	59.0649	protein_coding		AURKB	0.258283	5.91342	9.14069	1.99996e-19	5.81226e-18	33.1426	protein_coding		CCDC77	0.593964	5.47862	16.5761	1.72962e-53	5.01311e-52	110.742	protein_coding		STEAP4	-0.644295	4.62996	-15.8384	7.38447e-50
NOX4	-0.510541	4.16587	-15.6687	2.71705e-51	7.86452e-50	105.612	protein_coding		SFXN1	-0.36156	5.98271	-12.7794	1.53387e-35	4.39859e-34	69.7767	protein_coding		PLEKHO1	0.524738	6.84812	11.8178	7.46333e-31	2.1012e-29	59.0123	protein_coding		CTF1	-0.277072	6.07856	-9.13974	2.0167e-19	5.85304e-18	33.1344	protein_coding		ZNF92	0.413545	4.99004	16.566	1.96067e-53	5.67517e-52	110.617	protein_coding		TPM2	-0.419556	6.17754	-15.8315	8.04118e-50
CALCRL	-0.441827	5.16369	-15.6658	2.82302e-51	8.16034e-50	105.573	protein_coding		GUCA2B	0.663806	5.25221	12.7703	1.70486e-35	4.88244e-34	69.672	protein_coding		ZBTB4	0.292994	7.87517	11.8048	8.60203e-31	2.41864e-29	58.8716	protein_coding		BUB3	0.159091	7.8608	9.1394	2.02277e-19	5.86279e-18	33.1315	protein_coding		SYNE1	-0.230815	4.12442	-16.5556	2.23172e-53	6.4511e-52	110.488	protein_coding		KDR	-0.569807	6.33754	-15.8279	8.40636e-50
ECM2	-0.443635	5.41579	-15.6434	3.82033e-51	1.10285e-49	105.273	protein_coding		RNF185	0.218088	7.77003	12.7555	2.02177e-35	5.77474e-34	69.503	protein_coding		LRP12	0.449797	4.6635	11.7955	9.51002e-31	2.67046e-29	58.7722	protein_coding		LRR1	0.182599	6.991	9.13316	2.13628e-19	6.1835e-18	33.0777	protein_coding		MZT1	0.576658	6.56514	16.5554	2.23799e-53	6.4606e-52	110.485	protein_coding		SRGAP2C	-0.705007	6.08335	-15.8052	1.11297e-49
CDC25C	0.29291	5.41795	15.638	4.11021e-51	1.18495e-49	105.2	protein_coding		CENPW	-0.501941	9.28472	-12.7528	2.08579e-35	5.94973e-34	69.4721	protein_coding		RMND5B	-0.177608	6.83852	-11.7942	9.64687e-31	2.70538e-29	58.758	protein_coding		RNF166	0.285924	5.45383	9.13	2.19603e-19	6.34794e-18	33.0505	protein_coding		SAPCD2	0.669774	8.51344	16.5548	2.2563e-53	6.50477e-52	110.477	protein_coding		TREM1	-1.00709	6.22027	-15.7939	1.27916e-49
COL8A1	-0.629647	5.03863	-15.6337	4.35202e-51	1.25299e-49	105.143	protein_coding		C3	1.12559	9.14328	12.752	2.10591e-35	5.99922e-34	69.4626	protein_coding		MYOCD	0.636784	5.54206	11.7905	1.00477e-30	2.81412e-29	58.7177	protein_coding		LINC00996	0.1558	4.02035	9.12927	2.21013e-19	6.38016e-18	33.0442	lncRNA		SPSB1	-0.54556	6.61627	-16.5539	2.28009e-53	6.56458e-52	110.467	protein_coding		ADAMTS3	-0.313473	3.64004	-15.7787	1.54304e-49
CD83	-0.368338	7.21045	-15.6241	4.95089e-51	1.42162e-49	105.015	protein_coding		ASCC3	-0.377894	7.3469	-12.751	2.13034e-35	6.06083e-34	69.4512	protein_coding		CDH13	0.371562	5.03307	11.7892	1.01827e-30	2.84827e-29	58.7045	protein_coding		AMIGO2	-0.737576	8.20828	-9.12876	2.21998e-19	6.40005e-18	33.0398	protein_coding		GZMA	-1.19387	5.9789	-16.5483	2.44612e-53	7.03324e-52	110.397	protein_coding		MYH10	-0.737083	6.41883	-15.7514	2.16128e-49
STAT1	-0.620229	8.51752	-15.6188	5.3186e-51	1.52518e-49	104.943	protein_coding		UBA6	-0.291198	6.07347	-12.7502	2.15118e-35	6.11206e-34	69.4416	protein_coding		ARHGEF17	0.271856	7.08653	11.783	1.0889e-30	3.04016e-29	58.638	protein_coding		SIVA1	0.192183	7.39462	9.12812	2.2324e-19	6.42728e-18	33.0344	protein_coding		ABCE1	0.509683	8.90454	16.5422	2.63763e-53	7.57381e-52	110.322	protein_coding		CLIP3	-0.309403	5.51051	-15.7408	2.46041e-49
PDE4DIP	-0.199166	4.18256	-15.6082	6.13303e-51	1.7564e-49	104.802	protein_coding		BDP1	-0.27923	5.57106	-12.7449	2.28634e-35	6.48758e-34	69.3812	protein_coding		EMP1	0.41195	6.35341	11.783	1.08969e-30	3.04016e-29	58.6373	protein_coding		FANCA	0.206904	6.05466	9.12412	2.31182e-19	6.64708e-18	32.9999	protein_coding		UBASH3A	-0.350245	4.17935	-16.5385	2.76522e-53	7.92965e-52	110.275	protein_coding		ANGPT1	-0.338674	3.99039	-15.7321	2.73831e-49
CPVL	-0.853439	7.12972	-15.5983	7.01086e-51	2.00514e-49	104.669	protein_coding		FERMT3	0.521014	6.66927	12.7395	2.43447e-35	6.89884e-34	69.319	protein_coding		BNIP2	0.412979	7.14672	11.7756	1.18079e-30	3.28161e-29	58.5578	protein_coding		MACF1	-0.197474	7.28945	-9.11778	2.44352e-19	7.01643e-18	32.9454	protein_coding		SCARA5	-0.643347	5.27271	-16.5275	3.16907e-53	9.0757e-52	110.139	protein_coding		MMP11	-0.682613	7.20455	-15.7282	2.87322e-49
HOOK1	0.556873	7.47486	15.5941	7.41442e-51	2.11776e-49	104.613	protein_coding		SPAST	-0.489966	6.2647	-12.7376	2.48593e-35	7.03546e-34	69.2983	protein_coding		HEY2	0.29113	5.03746	11.7716	1.23307e-30	3.42252e-29	58.5149	protein_coding		MPI	0.220851	5.97948	9.11737	2.45222e-19	7.03208e-18	32.9419	protein_coding		FAM214B	-0.438233	7.31143	-16.4882	5.17397e-53	1.47978e-51	109.651	protein_coding		CCL8	-0.934114	6.03261	-15.7209	3.14489e-49
PIK3AP1	-0.603835	6.52024	-15.5853	8.34608e-51	2.38073e-49	104.495	protein_coding		SOX10	0.237659	5.84991	12.7307	2.69284e-35	7.61107e-34	69.219	protein_coding		ECM1	0.558344	7.92872	11.7698	1.25686e-30	3.48407e-29	58.4959	protein_coding		CHMP4B	-0.329983	9.79048	-9.11192	2.57176e-19	7.36512e-18	32.895	protein_coding		MSRB3	-0.660482	6.08041	-16.4875	5.21466e-53	1.48941e-51	109.643	protein_coding		PDGFRA	-0.298904	5.32575	-15.7185	3.23958e-49
HOXB2	-0.62026	7.2707	-15.5714	1.00639e-50	2.86694e-49	104.309	protein_coding		METTL8	-0.332005	5.97378	-12.7306	2.69735e-35	7.61384e-34	69.2174	protein_coding		CHST15	0.366708	5.94754	11.7649	1.32558e-30	3.66986e-29	58.4432	protein_coding		RBBP8	0.357007	8.58248	9.11056	2.60243e-19	7.44308e-18	32.8833	protein_coding		COL14A1	-0.536045	4.95468	-16.4874	5.22141e-53	1.48941e-51	109.642	protein_coding		PIP4K2A	-0.317979	6.66887	-15.7014	3.99886e-49
UMPS	0.20569	6.48815	15.5632	1.12295e-50	3.19479e-49	104.2	protein_coding		ZNF184	-0.431807	7.00241	-12.7268	2.81627e-35	7.93917e-34	69.1746	protein_coding		RFTN2	0.139249	4.49783	11.7515	1.53161e-30	4.22943e-29	58.3001	protein_coding		DOCK10	0.244963	4.35337	9.10339	2.77046e-19	7.9132e-18	32.8217	protein_coding		FCGR2C	-0.518832	6.33661	-16.4855	5.34564e-53	1.52284e-51	109.619	polymorphic_pseudogene		SLC31A2	-0.579269	6.5253	-15.7008	4.02626e-49
TSC22D3	-0.322533	6.38327	-15.5579	1.20558e-50	3.42536e-49	104.13	protein_coding		NUP37	-0.28569	7.71388	-12.72	3.04688e-35	8.56693e-34	69.0967	protein_coding		SLC39A13	0.219949	7.09898	11.7427	1.68627e-30	4.65058e-29	58.2047	protein_coding		PDCD6IP	-0.207491	9.4228	-9.09366	3.01555e-19	8.59622e-18	32.7382	protein_coding		PLEKHF1	-0.461213	6.85174	-16.4824	5.55801e-53	1.58125e-51	109.58	protein_coding		FGD5	-0.413543	6.25134	-15.69	4.60035e-49
SMAP2	-0.377102	7.62105	-15.5519	1.30628e-50	3.7066e-49	104.05	protein_coding		GTF2H3	-0.325548	8.07404	-12.7145	3.24505e-35	9.11226e-34	69.0342	protein_coding		MRPL38	-0.191073	6.70545	-11.7315	1.90175e-30	5.23816e-29	58.0856	protein_coding		HLA-B	0.318466	12.6126	9.09359	3.01754e-19	8.59622e-18	32.7376	protein_coding		PXDC1	-0.444188	6.626	-16.473	6.24955e-53	1.77566e-51	109.463	protein_coding		CNTNAP1	-0.466901	5.96078	-15.6878	4.72574e-49
MAP1B	-0.611309	5.92338	-15.5508	1.32594e-50	3.75747e-49	104.035	protein_coding		ATP2A3	0.467638	6.26327	12.7134	3.28953e-35	9.22519e-34	69.0207	protein_coding		CLU	0.575068	5.9012	11.7306	1.92133e-30	5.28536e-29	58.0755	protein_coding		FLT3LG	0.171475	4.94607	9.0933	3.02505e-19	8.60627e-18	32.7351	protein_coding		ITGB7	-0.47416	6.80165	-16.4714	6.3712e-53	1.80785e-51	109.444	protein_coding		CCDC50	-0.491078	6.70155	-15.6871	4.7659e-49
CLCN5	0.392355	5.3023	15.5501	1.33877e-50	3.78885e-49	104.025	protein_coding		CAND1	-0.249952	6.68967	-12.7091	3.45683e-35	9.68181e-34	68.9716	protein_coding		USP30-AS1	-0.276795	5.34983	-11.7195	2.1647e-30	5.94181e-29	57.9573	lncRNA		CENPH	0.420436	7.07999	9.09188	3.06282e-19	8.70226e-18	32.7229	protein_coding		VRK1	0.644949	8.02578	16.4656	6.85489e-53	1.94001e-51	109.371	protein_coding		CD52	-0.81245	6.79768	-15.6834	4.9864e-49
SLFN12	-0.385188	4.50824	-15.5494	1.35085e-50	3.81804e-49	104.016	protein_coding		AXL	0.45716	6.85506	12.7013	3.77968e-35	1.05723e-33	68.8831	protein_coding		ROBO1	0.739462	7.83056	11.7135	2.31113e-30	6.32548e-29	57.8925	protein_coding		HMGCS2	-0.811966	7.38094	-9.09104	3.08518e-19	8.7543e-18	32.7157	protein_coding		THY1	-0.846389	8.03786	-16.4469	8.64974e-53	2.44243e-51	109.14	protein_coding		RGS4	-0.624545	5.12339	-15.6701	5.87067e-49
PRICKLE1	-0.417916	4.74465	-15.5462	1.40936e-50	3.97823e-49	103.974	protein_coding		NUP43	-0.326019	6.96287	-12.7003	3.82416e-35	1.06695e-33	68.8715	protein_coding		MYH9	0.298757	9.27843	11.698	2.72954e-30	7.45178e-29	57.7276	protein_coding		PRPF39	0.457462	7.2102	9.08835	3.15831e-19	8.95007e-18	32.6927	protein_coding		PHF14	0.55466	6.21685	16.4468	8.65275e-53	2.44243e-51	109.139	protein_coding		CMAHP	-0.466024	4.3285	-15.6641	6.3235e-49
RBM15	0.206683	6.89589	15.5406	1.51974e-50	4.28419e-49	103.899	protein_coding		UBE2T	-0.499332	8.74235	-12.7003	3.82427e-35	1.06695e-33	68.8715	protein_coding		NOTCH2	0.258365	7.48135	11.6978	2.73698e-30	7.46266e-29	57.7249	protein_coding		GIMAP8	0.268618	4.63597	9.08647	3.21035e-19	9.08562e-18	32.6766	protein_coding		LGALS1	-0.938917	10.8459	-16.4408	9.32907e-53	2.6299e-51	109.065	protein_coding		CD36	-0.645281	4.38327	-15.6616	6.52033e-49
ABI3	-0.274693	6.9398	-15.5399	1.5337e-50	4.31792e-49	103.89	protein_coding		HLA-DMB	0.738671	8.58463	12.6993	3.86653e-35	1.07735e-33	68.8606	protein_coding		SFXN3	0.294569	6.96591	11.6949	2.82487e-30	7.69261e-29	57.6936	protein_coding		APOLD1	-0.767291	7.47466	-9.08522	3.24541e-19	9.17285e-18	32.6659	protein_coding		SPI1	-0.46167	5.03554	-16.4399	9.43219e-53	2.6555e-51	109.054	protein_coding		CD74	-0.599934	7.81579	-15.6605	6.60435e-49
PSTPIP1	-0.320456	5.32178	-15.5239	1.90065e-50	5.34407e-49	103.677	protein_coding		TMEM33	-0.361592	7.66547	-12.6911	4.25035e-35	1.18277e-33	68.7668	protein_coding		HAND2-AS1	0.405592	3.71585	11.6866	3.08685e-30	8.39547e-29	57.6058	lncRNA		PLAC9	-0.182975	5.64521	-9.07858	3.43862e-19	9.69359e-18	32.6089	protein_coding		NOM1	0.502843	6.95653	16.4357	9.93722e-53	2.79405e-51	109.002	protein_coding		ZNF25	-0.497004	5.37205	-15.6574	6.86612e-49
ATAD5	0.287102	5.70134	15.5205	1.98993e-50	5.58783e-49	103.631	protein_coding		FGL2	0.862673	7.20701	12.6863	4.49244e-35	1.24853e-33	68.712	protein_coding		PHLDA3	0.392195	6.98327	11.6845	3.15763e-30	8.57717e-29	57.5833	protein_coding		GALNT6	-0.501924	7.7849	-9.07224	3.63361e-19	1.02299e-17	32.5546	protein_coding		DOK5	-0.503201	5.28629	-16.4297	1.07115e-52	3.00784e-51	108.927	protein_coding		ARHGAP31	-0.283967	4.85279	-15.6557	7.00318e-49
CLEC10A	-0.460645	5.49123	-15.4982	2.68088e-50	7.49884e-49	103.335	protein_coding		PDE7B	0.16409	4.88285	12.6802	4.81783e-35	1.33553e-33	68.6427	protein_coding		AP1S2	0.362134	7.22728	11.6836	3.18904e-30	8.65161e-29	57.5735	protein_coding		PSIP1	0.250159	6.55123	9.06979	3.71168e-19	1.04361e-17	32.5337	protein_coding		PLAC9	-0.331079	5.65954	-16.4278	1.09678e-52	3.07581e-51	108.904	protein_coding		AURKA	0.520624	7.43449	15.619	1.09874e-48
CMAHP	-0.388636	4.39185	-15.4853	3.18905e-50	8.90875e-49	103.162	transcribed_unitary_pseudogene		HSD17B12	-0.190982	5.66654	-12.68	4.82927e-35	1.33699e-33	68.6403	protein_coding		SPIN1	0.302647	8.22507	11.6621	4.01815e-30	1.08873e-28	57.3446	protein_coding		REEP1	-0.737924	5.9916	-9.06845	3.75518e-19	1.05447e-17	32.5222	protein_coding		PPHLN1	0.264872	6.05249	16.4268	1.11004e-52	3.10897e-51	108.892	protein_coding		LSAMP	-0.391783	4.74782	-15.6126	1.18949e-48
TNFRSF9	-0.20569	4.6189	-15.4821	3.32856e-50	9.28645e-49	103.119	protein_coding		C11orf86	0.331611	6.31709	12.6795	4.856e-35	1.34234e-33	68.6349	protein_coding		SHC1	0.248326	8.82861	11.6586	4.1726e-30	1.12916e-28	57.3072	protein_coding		TTC28-AS1	0.12682	5.01356	9.06617	3.83049e-19	1.07423e-17	32.5027	lncRNA		DDX18	0.389994	9.08817	16.4156	1.27575e-52	3.56846e-51	108.753	protein_coding		SHISA2	-1.13913	5.66379	-15.6097	1.23223e-48
LOX	-0.748296	5.50593	-15.4788	3.47861e-50	9.6926e-49	103.076	protein_coding		PLA2G2D	0.319	5.58799	12.6794	4.86102e-35	1.34234e-33	68.6338	protein_coding		PXMP2	-0.368223	8.03316	-11.6458	4.78826e-30	1.29415e-28	57.1709	protein_coding		RABGGTA	0.212911	7.16362	9.06347	3.92117e-19	1.09823e-17	32.4796	protein_coding		EIF3J	0.469136	8.4948	16.4142	1.2975e-52	3.62463e-51	108.736	protein_coding		AP1S2	-0.50416	7.20155	-15.6026	1.34424e-48
FLVCR1	0.572412	7.8724	15.4593	4.50913e-50	1.25317e-48	102.817	protein_coding		GINS1	-0.695542	8.48968	-12.6791	4.88176e-35	1.34634e-33	68.6296	protein_coding		SERTAD4-AS1	0.359496	4.93586	11.6445	4.8581e-30	1.31138e-28	57.1565	lncRNA		TMEM245	-0.200058	7.74287	-9.06237	3.95886e-19	1.10736e-17	32.4702	protein_coding		CCDC150	0.340866	4.44275	16.4094	1.3787e-52	3.84649e-51	108.676	protein_coding		RTN1	-0.684952	4.77906	-15.5993	1.3987e-48
CILP	-0.72445	5.96842	-15.4542	4.82628e-50	1.33959e-48	102.75	protein_coding		CYSLTR1	0.259783	4.13903	12.6774	4.97817e-35	1.37119e-33	68.6102	protein_coding		A2M-AS1	0.271271	4.18698	11.633	5.49219e-30	1.4807e-28	57.035	lncRNA		UBA6	0.21433	6.07347	9.05967	4.05273e-19	1.13215e-17	32.4471	protein_coding		PILRA	-0.484371	5.14037	-16.4089	1.38565e-52	3.8609e-51	108.671	protein_coding		ZFHX4	-0.279546	4.38492	-15.591	1.54904e-48
MPDZ	-0.509556	5.76676	-15.4529	4.91372e-50	1.36211e-48	102.732	protein_coding		ZNF138	-0.253982	4.97261	-12.677	5.00177e-35	1.37593e-33	68.6056	protein_coding		SCUBE2	0.456603	5.32844	11.629	5.73661e-30	1.54467e-28	56.9919	protein_coding		FCGR3B	0.622211	6.69642	9.05849	4.09466e-19	1.14238e-17	32.437	protein_coding		DOCK8	-0.573323	4.80749	-16.4066	1.4271e-52	3.97128e-51	108.642	protein_coding		CAP2	-0.730931	5.66125	-15.5764	1.85283e-48
NCF4	-0.550813	6.30311	-15.4494	5.148e-50	1.42522e-48	102.686	protein_coding		GLMN	-0.383761	6.90517	-12.6764	5.03096e-35	1.3822e-33	68.5998	protein_coding		HIC1	0.243346	5.11694	11.6281	5.78939e-30	1.55694e-28	56.9828	protein_coding		GATAD1	-0.245594	7.05984	-9.05359	4.27238e-19	1.19043e-17	32.3951	protein_coding		CCNF	0.42718	6.30324	16.4001	1.54617e-52	4.29709e-51	108.562	protein_coding		TMEM177	0.303163	6.57893	15.5639	2.15805e-48
GM2A	-0.300207	6.71003	-15.4438	5.55156e-50	1.53499e-48	102.611	protein_coding		TRANK1	0.426396	6.50093	12.6728	5.24397e-35	1.4389e-33	68.5587	protein_coding		HECTD2	0.166159	3.71657	11.6182	6.43769e-30	1.72914e-28	56.8777	protein_coding		LIN54	0.208768	4.03867	9.05193	4.33427e-19	1.20612e-17	32.381	protein_coding		CD1C	-0.421141	6.24867	-16.3974	1.59944e-52	4.43942e-51	108.528	protein_coding		GPR68	-0.272485	5.55233	-15.5609	2.23956e-48
PUS7	0.502543	8.79015	15.4397	5.86403e-50	1.61931e-48	102.556	protein_coding		CSF1	0.147485	5.64372	12.67	5.41645e-35	1.48434e-33	68.5266	protein_coding		AFAP1L1	0.194543	4.90698	11.6149	6.67182e-30	1.7898e-28	56.8423	protein_coding		FGL2	0.637216	7.20701	9.05047	4.38972e-19	1.21868e-17	32.3685	protein_coding		SPIN4	0.781889	8.2392	16.3963	1.62164e-52	4.49527e-51	108.514	protein_coding		COL5A3	-0.501711	6.3028	-15.558	2.32109e-48
SFRP4	-1.26194	6.12694	-15.4287	6.79087e-50	1.87286e-48	102.41	protein_coding		CCT2	-0.361105	10.7487	-12.6575	6.25217e-35	1.7112e-33	68.3845	protein_coding		TEK	0.214848	5.75413	11.6075	7.22293e-30	1.93524e-28	56.7637	protein_coding		TRIM14	0.162107	6.01448	9.05044	4.39069e-19	1.21868e-17	32.3683	protein_coding		LPAR1	-0.607883	6.15249	-16.3913	1.7242e-52	4.77345e-51	108.453	protein_coding		APOC1	-0.826966	7.98268	-15.5571	2.34424e-48
PLAU	-0.716388	7.8075	-15.4257	7.06069e-50	1.94479e-48	102.371	protein_coding		RNASE6	0.638099	7.34596	12.6525	6.62322e-35	1.81046e-33	68.3274	protein_coding		TGFB1	0.337641	6.30955	11.5912	8.60252e-30	2.30203e-28	56.5905	protein_coding		PSAT1	0.614512	8.40156	9.04048	4.78693e-19	1.32696e-17	32.2832	protein_coding		NRROS	-0.440087	5.56677	-16.3902	1.74943e-52	4.83711e-51	108.439	protein_coding		PLA2G7	-0.755426	6.49184	-15.5559	2.38103e-48
LXN	-0.714131	8.38875	-15.4252	7.11397e-50	1.95698e-48	102.364	protein_coding		ZBTB24	-0.305494	5.2152	-12.6514	6.705e-35	1.8305e-33	68.3152	protein_coding		BTBD19	0.202671	5.47885	11.5905	8.66719e-30	2.31646e-28	56.5831	protein_coding		TNFAIP8	0.355905	6.55594	9.03905	4.84657e-19	1.34177e-17	32.271	protein_coding		EVA1B	-0.31802	6.51116	-16.3837	1.89627e-52	5.23298e-51	108.359	protein_coding		KLF9	-0.405448	5.34813	-15.5469	2.65799e-48
LITAF	-0.273389	7.60739	-15.3968	1.03877e-49	2.85392e-48	101.987	protein_coding		TRMT61B	-0.323634	7.83589	-12.6373	7.8865e-35	2.15034e-33	68.1544	protein_coding		GEMIN7	-0.181151	6.92888	-11.5685	1.09573e-29	2.92493e-28	56.3509	protein_coding		COL9A1	-0.153897	4.32608	-9.02954	5.26255e-19	1.45508e-17	32.1899	protein_coding		TCF4	-0.759688	7.15102	-16.3836	1.89862e-52	5.23298e-51	108.358	protein_coding		SPAG5	0.534018	7.59659	15.5447	2.73084e-48
HLA-DOA	-0.218068	5.91306	-15.3893	1.14708e-49	3.14748e-48	101.889	protein_coding		LLPH	-0.295246	5.98089	-12.6282	8.7547e-35	2.38406e-33	68.0509	protein_coding		HGF	0.181874	4.32893	11.5412	1.46625e-29	3.90915e-28	56.0623	protein_coding		NCKAP1L	0.295273	6.0426	9.01406	6.01704e-19	1.66156e-17	32.058	protein_coding		KIF21A	0.620275	5.96228	16.3835	1.89987e-52	5.23298e-51	108.357	protein_coding		CYSLTR1	-0.256086	4.03798	-15.5434	2.7743e-48
KIF20B	0.369605	7.43522	15.3824	1.25679e-49	3.44415e-48	101.798	protein_coding		IL2RB	0.500964	7.31487	12.6165	1.00089e-34	2.71876e-33	67.9183	protein_coding		DDX28	-0.183547	5.99394	-11.5344	1.57638e-29	4.19243e-28	55.9906	protein_coding		CBFA2T2	-0.273795	6.75199	-9.01288	6.07864e-19	1.67643e-17	32.048	protein_coding		ADRB2	-0.563482	4.59577	-16.3768	2.0643e-52	5.67867e-51	108.274	protein_coding		C4orf3	-0.489343	8.95875	-15.5322	3.182e-48
PDLIM4	-0.281882	5.60143	-15.3775	1.34226e-49	3.66908e-48	101.733	protein_coding		FBXO11	-0.260694	6.67233	-12.6158	1.00938e-34	2.73837e-33	67.9099	protein_coding		ELN	0.328332	6.26026	11.5155	1.9276e-29	5.12022e-28	55.7914	protein_coding		P2RY6	0.18241	5.91624	9.0123	6.10905e-19	1.68267e-17	32.043	protein_coding		L2HGDH	0.37065	5.24799	16.3765	2.07394e-52	5.69793e-51	108.27	protein_coding		MRPL12	0.302322	7.66594	15.5256	3.44754e-48
DTYMK	0.213996	5.97546	15.3718	1.44724e-49	3.95104e-48	101.658	protein_coding		HCK	0.634567	6.97057	12.614	1.03033e-34	2.79169e-33	67.8896	protein_coding		ITGAM	0.620809	6.22752	11.5128	1.98449e-29	5.26485e-28	55.7626	protein_coding		ACTG2	-0.475504	7.07234	-9.00904	6.28398e-19	1.72865e-17	32.0152	protein_coding		NUP54	0.23246	4.99656	16.3717	2.20032e-52	6.03747e-51	108.211	protein_coding		LMCD1	-0.410121	5.51245	-15.5169	3.83467e-48
CD3G	-0.313919	5.2704	-15.368	1.52409e-49	4.1556e-48	101.606	protein_coding		CDADC1	-0.29622	5.72165	-12.6097	1.08225e-34	2.9287e-33	67.8409	protein_coding		IDS	0.184611	5.76472	11.5025	2.21444e-29	5.86771e-28	55.654	protein_coding		ACACB	-0.213785	6.15491	-9.00288	6.62713e-19	1.82073e-17	31.9629	protein_coding		MAP7D1	-0.532446	7.41814	-16.3588	2.58214e-52	7.07617e-51	108.052	protein_coding		PLVAP	-0.638117	7.83529	-15.5055	4.40734e-48
TPP1	-0.329698	8.09411	-15.3606	1.68161e-49	4.57931e-48	101.508	protein_coding		CEP57	-0.400144	7.49772	-12.601	1.19509e-34	3.23003e-33	67.7426	protein_coding		TPMT	-0.222552	6.07631	-11.4975	2.33521e-29	6.18015e-28	55.6014	protein_coding		FCRL3	0.190861	4.34556	8.99905	6.85025e-19	1.87965e-17	31.9303	protein_coding		JAM3	-0.445525	5.36338	-16.3577	2.61677e-52	7.16201e-51	108.038	protein_coding		GLIS3	-0.666732	4.79514	-15.495	5.01228e-48
RGL1	-0.479741	7.52528	-15.3508	1.91567e-49	5.21013e-48	101.379	protein_coding		FBLN1	0.533539	6.46809	12.594	1.29563e-34	3.49738e-33	67.6626	protein_coding		GPM6A	0.463839	4.35137	11.497	2.34677e-29	6.20316e-28	55.5965	protein_coding		LAPTM5	0.558627	9.24589	8.99885	6.86186e-19	1.88045e-17	31.9286	protein_coding		LDB2	-0.392317	4.93882	-16.3551	2.70211e-52	7.38624e-51	108.006	protein_coding		LHFPL2	-0.421767	8.03914	-15.494	5.06845e-48
ZNF677	-0.215783	3.68182	-15.3448	2.07411e-49	5.63397e-48	101.3	protein_coding		SIDT2	0.353276	8.22097	12.5938	1.29746e-34	3.49795e-33	67.6612	protein_coding		KLF9	0.277453	5.37932	11.4924	2.46594e-29	6.5102e-28	55.5475	protein_coding		FAS	0.524521	6.88943	8.99838	6.88947e-19	1.88562e-17	31.9247	protein_coding		SAMSN1	-0.723291	4.93425	-16.3475	2.97055e-52	8.10975e-51	107.912	protein_coding		ITM2B	-0.359373	11.4215	-15.4853	5.63969e-48
IDO1	-1.03651	7.11584	-15.3444	2.08472e-49	5.65569e-48	101.295	protein_coding		PALB2	-0.335034	7.44722	-12.5872	1.39972e-34	3.76897e-33	67.586	protein_coding		DBN1	0.444581	7.01883	11.4849	2.67124e-29	7.0436e-28	55.4683	protein_coding		CACNA1D	-0.312891	5.37469	-8.99622	7.01914e-19	1.91868e-17	31.9063	protein_coding		CHST2	-0.302449	4.65459	-16.3454	3.04708e-52	8.30818e-51	107.887	protein_coding		BTK	-0.367299	5.65667	-15.4545	8.21362e-48
COA7	0.283425	7.19742	15.3426	2.13334e-49	5.78032e-48	101.272	protein_coding		CCL2	0.92756	7.88815	12.569	1.72454e-34	4.63782e-33	67.3793	protein_coding		TACO1	-0.159126	5.95953	-11.4771	2.89948e-29	7.63611e-28	55.3871	protein_coding		SP140L	0.163338	5.14735	8.99503	7.09191e-19	1.93613e-17	31.8962	protein_coding		TPX2	0.858802	9.50893	16.3429	3.14354e-52	8.56041e-51	107.856	protein_coding		RNF144A	-0.378727	5.32718	-15.4195	1.25648e-47
NAP1L3	-0.692237	4.20004	-15.3375	2.2831e-49	6.17837e-48	101.204	protein_coding		DCAF17	-0.417878	5.60694	-12.5679	1.74531e-34	4.68784e-33	67.3674	protein_coding		ABL2	0.20889	6.33516	11.4742	2.99142e-29	7.86868e-28	55.3561	protein_coding		HJURP	0.331503	7.54016	8.99346	7.18823e-19	1.95995e-17	31.8829	protein_coding		CD96	-0.326172	4.12194	-16.341	3.218e-52	8.75216e-51	107.832	protein_coding		GADD45B	-0.530629	7.08039	-15.4094	1.42223e-47
CKAP2L	0.451023	7.07832	15.3365	2.31549e-49	6.2582e-48	101.19	protein_coding		DGKE	-0.182465	4.44457	-12.5658	1.78753e-34	4.79527e-33	67.3438	protein_coding		HSPB1	0.545977	10.766	11.469	3.16196e-29	8.30716e-28	55.3012	protein_coding		ZNF423	-0.510853	5.90827	-8.98847	7.50456e-19	2.04362e-17	31.8405	protein_coding		LIN9	0.239305	3.8952	16.3408	3.22549e-52	8.7615e-51	107.83	protein_coding		CD34	-0.420584	6.64989	-15.4075	1.45494e-47
P2RY14	-0.822051	5.74859	-15.3351	2.35987e-49	6.37019e-48	101.171	protein_coding		FBXL4	-0.458528	5.84696	-12.5557	2.00593e-34	5.37451e-33	67.2296	protein_coding		LIMS2	0.386063	6.60407	11.4686	3.17461e-29	8.33027e-28	55.2973	protein_coding		GEMIN2	0.31396	6.44442	8.98817	7.52398e-19	2.04633e-17	31.8379	protein_coding		SPDL1	0.576538	7.08277	16.337	3.38204e-52	9.16372e-51	107.783	protein_coding		CMSS1	0.477957	8.54608	15.4059	1.48324e-47
XPOT	0.409867	9.06937	15.3336	2.40545e-49	6.48511e-48	101.152	protein_coding		TRA2B	-0.207051	7.67607	-12.552	2.0939e-34	5.60326e-33	67.187	protein_coding		CPXM2	0.29387	5.62396	11.4667	3.23764e-29	8.48537e-28	55.2778	protein_coding		B9D1	0.218956	6.03812	8.98391	7.80531e-19	2.12018e-17	31.8018	protein_coding		RFC5	0.481564	7.40768	16.3354	3.4497e-52	9.33533e-51	107.763	protein_coding		FMOD	-0.84356	8.34303	-15.4018	1.55903e-47
TFAM	0.388258	6.98687	15.332	2.45601e-49	6.61319e-48	101.132	protein_coding		RFC3	-0.421569	7.25003	-12.5473	2.20787e-34	5.90093e-33	67.1345	protein_coding		CILP	0.623202	5.96842	11.4651	3.29374e-29	8.62195e-28	55.2608	protein_coding		ZFHX3	-0.177035	5.50073	-8.98353	7.83135e-19	2.12459e-17	31.7985	protein_coding		SRSF10	0.429913	8.14924	16.3136	4.52081e-52	1.22186e-50	107.494	protein_coding		CDH2	-0.385884	4.92275	-15.3963	1.66644e-47
SKA3	0.484901	7.41936	15.3274	2.61233e-49	7.02535e-48	101.07	protein_coding		STMN1	-0.218672	5.99884	-12.5434	2.30775e-34	6.16027e-33	67.0907	protein_coding		MEF2A	0.254412	6.08415	11.4349	4.53622e-29	1.186e-27	54.9438	protein_coding		LACTB	0.305934	6.4163	8.98334	7.84401e-19	2.12535e-17	31.7969	protein_coding		ASAP3	-0.446449	6.19911	-16.3124	4.59017e-52	1.23906e-50	107.479	protein_coding		ITGA4	-0.590398	4.89889	-15.3962	1.67014e-47
CDK1	0.49155	7.76105	15.3234	2.75637e-49	7.39432e-48	101.017	protein_coding		CCNT2	-0.296386	5.9262	-12.5401	2.39823e-34	6.3939e-33	67.0526	protein_coding		MRPS15	-0.201249	7.30528	-11.4237	5.10593e-29	1.33173e-27	54.8266	protein_coding		NEIL3	0.342011	5.59591	8.98283	7.87862e-19	2.13206e-17	31.7926	protein_coding		PSTPIP1	-0.414262	5.26719	-16.3022	5.20653e-52	1.40369e-50	107.354	protein_coding		FIGN	-0.239413	3.67835	-15.3942	1.71019e-47
CDK14	-0.248819	5.55404	-15.3185	2.9385e-49	7.87314e-48	100.953	protein_coding		PPP1R16B	0.330403	5.16774	12.5384	2.44504e-34	6.51068e-33	67.0335	protein_coding		C1orf54	0.447749	7.85577	11.419	5.3645e-29	1.39748e-27	54.7777	protein_coding		TDP1	0.143324	5.98561	8.98131	7.98217e-19	2.15738e-17	31.7797	protein_coding		HMOX1	-0.767603	7.40774	-16.2832	6.58844e-52	1.77183e-50	107.119	protein_coding		ZNF469	-0.435533	6.79604	-15.3887	1.82808e-47
OLR1	-0.851152	4.5104	-15.3158	3.04639e-49	8.1521e-48	100.917	protein_coding		RAB3IP	-0.24737	4.94705	-12.5366	2.49356e-34	6.63169e-33	67.014	protein_coding		TGFBI	0.581245	11.7781	11.4155	5.56778e-29	1.4487e-27	54.7409	protein_coding		POC1A	0.234619	6.41414	8.98065	8.02833e-19	2.16715e-17	31.7741	protein_coding		DENR	0.312396	7.06376	16.277	7.10684e-52	1.90887e-50	107.044	protein_coding		TSC22D3	-0.361954	6.32072	-15.3851	1.9113e-47
MRPS35	0.329809	10.2604	15.3095	3.31083e-49	8.84879e-48	100.835	protein_coding		TUBE1	-0.3024	4.88529	-12.5327	2.6084e-34	6.9201e-33	66.9694	protein_coding		TMEM229B	-0.153997	5.45038	-11.4098	5.91459e-29	1.53708e-27	54.6811	protein_coding		RAB43	0.17909	5.99616	8.97918	8.13031e-19	2.19194e-17	31.7616	protein_coding		ODC1	0.617226	11.1859	16.274	7.37661e-52	1.97887e-50	107.007	protein_coding		TREM2	-0.485643	6.48318	-15.3793	2.04993e-47
SPAG5	0.443881	7.52493	15.3087	3.34826e-49	8.93779e-48	100.823	protein_coding		NUP153	-0.272085	6.44569	-12.5245	2.86202e-34	7.58366e-33	66.8775	protein_coding		PSMB10	-0.403479	9.10291	-11.4019	6.42579e-29	1.66793e-27	54.599	protein_coding		RHBDF1	-0.193524	6.63622	-8.97625	8.33853e-19	2.24528e-17	31.7367	protein_coding		PMP22	-0.36416	5.40429	-16.2703	7.72132e-52	2.06622e-50	106.962	protein_coding		RAB23	-0.715794	7.18776	-15.371	2.26771e-47
MMAB	0.226427	6.051	15.303	3.61119e-49	9.62777e-48	100.748	protein_coding		DUT	-0.340832	9.40435	-12.52	3.01434e-34	7.97748e-33	66.8261	protein_coding		ADAMTSL3	0.220223	4.92195	11.3968	6.7822e-29	1.75833e-27	54.5455	protein_coding		MXRA8	-0.454273	7.87127	-8.97115	8.71285e-19	2.34315e-17	31.6935	protein_coding		IGHD	-0.633135	5.41157	-16.265	8.24474e-52	2.20356e-50	106.896	IG_C_gene		PLA2G5	-0.267151	4.48247	-15.3681	2.3501e-47
LAMA4	-0.259304	5.56198	-15.302	3.65891e-49	9.74298e-48	100.735	protein_coding		KLHDC8B	0.389382	6.80642	12.5194	3.03323e-34	8.01766e-33	66.8199	protein_coding		NUDT11	0.256037	5.3662	11.3905	7.24915e-29	1.87714e-27	54.4796	protein_coding		GAD1	0.423378	4.73168	8.96655	9.06408e-19	2.43458e-17	31.6546	protein_coding		CD59	-0.486022	8.79902	-16.259	8.87776e-52	2.36981e-50	106.823	protein_coding		IGSF6	-0.425956	4.28677	-15.3621	2.52623e-47
ANK2	-0.272824	4.10675	-15.3007	3.72462e-49	9.90574e-48	100.718	protein_coding		KIAA1958	-0.343625	6.43335	-12.518	3.08404e-34	8.142e-33	66.8035	protein_coding		FAT3	0.112286	3.5418	11.3709	8.91363e-29	2.30539e-27	54.2749	protein_coding		GMEB1	0.150998	6.31926	8.96206	9.42172e-19	2.5275e-17	31.6165	protein_coding		MCM2	0.608933	8.95455	16.2561	9.20582e-52	2.45436e-50	106.787	protein_coding		MYADM	-0.67659	8.63138	-15.3575	2.67011e-47
LAMB2	-0.517311	6.86466	-15.2863	4.50494e-49	1.19663e-47	100.528	protein_coding		ZMIZ1	0.208122	6.49487	12.5165	3.13769e-34	8.27354e-33	66.7864	protein_coding		HSPB2	0.29107	5.81953	11.3598	1.00165e-28	2.58754e-27	54.1594	protein_coding		PDZD2	-0.230395	4.23867	-8.95951	9.63014e-19	2.58021e-17	31.595	protein_coding		S1PR1	-0.503758	5.55578	-16.2546	9.37509e-52	2.49641e-50	106.768	protein_coding		GBP2	-0.724853	7.37819	-15.3552	2.74877e-47
CD38	-0.569571	5.94235	-15.2838	4.65936e-49	1.23613e-47	100.495	protein_coding		ZRANB3	-0.177864	4.58589	-12.5137	3.23759e-34	8.52659e-33	66.7553	protein_coding		CACNA1C	0.212154	4.76539	11.3361	1.28498e-28	3.31153e-27	53.9127	protein_coding		CDC42EP1	0.378037	7.24483	8.9579	9.76466e-19	2.61301e-17	31.5813	protein_coding		ADAM28	-0.455547	4.79739	-16.2493	1.00119e-51	2.6627e-50	106.703	protein_coding		PAM	-0.610314	9.3165	-15.3324	3.62443e-47
RABAC1	-0.399419	9.58078	-15.2825	4.73828e-49	1.25553e-47	100.478	protein_coding		P2RY10	0.261589	4.29359	12.5126	3.27827e-34	8.62321e-33	66.7429	protein_coding		SELE	0.654101	4.74756	11.329	1.38488e-28	3.56474e-27	53.8386	protein_coding		DAPP1	0.239573	5.60638	8.95234	1.02428e-18	2.73757e-17	31.5343	protein_coding		UBR3	0.303715	5.9855	16.2461	1.04147e-51	2.76642e-50	106.664	protein_coding		NUP37	0.335939	7.75678	15.3009	5.31013e-47
ADAM28	-0.348991	4.85523	-15.2807	4.85339e-49	1.28446e-47	100.454	protein_coding		HSPA14	-0.281902	7.44917	-12.5054	3.5573e-34	9.3458e-33	66.662	protein_coding		MAGED2	0.330451	8.25764	11.3273	1.41015e-28	3.62547e-27	53.8207	protein_coding		ZNF704	-0.250612	5.27079	-8.95001	1.04499e-18	2.78947e-17	31.5146	protein_coding		AEBP2	0.382924	5.80437	16.225	1.35194e-51	3.58669e-50	106.404	protein_coding		LPP	-0.347668	7.34493	-15.2986	5.45622e-47
DNM3OS	-0.414495	4.52541	-15.2717	5.46446e-49	1.44441e-47	100.336	lncRNA		APOBEC3G	0.402995	6.69941	12.5051	3.57036e-34	9.36872e-33	66.6584	protein_coding		DEGS1	0.421986	8.54892	11.3161	1.58569e-28	4.07194e-27	53.7045	protein_coding		MAGED1	-0.304753	10.1486	-8.94809	1.06233e-18	2.83226e-17	31.4984	protein_coding		NEK4	0.352606	6.13594	16.2192	1.45316e-51	3.85051e-50	106.332	protein_coding		LYVE1	-0.615379	4.69145	-15.2969	5.57285e-47
ANKRD35	-0.316626	5.34236	-15.2486	7.42223e-49	1.9595e-47	100.032	protein_coding		NAA16	-0.405691	6.67347	-12.5022	3.68898e-34	9.66826e-33	66.626	protein_coding		ZNF787	-0.163843	5.63579	-11.3105	1.68237e-28	4.31508e-27	53.6459	protein_coding		PSMA3	0.126378	6.48928	8.93425	1.19631e-18	3.18164e-17	31.3814	protein_coding		CPSF6	0.401881	7.75166	16.2151	1.52803e-51	4.04395e-50	106.282	protein_coding		ANGPTL1	-0.590106	3.72237	-15.2893	6.10894e-47
DIAPH3	0.329438	5.59747	15.2386	8.46727e-49	2.22996e-47	99.9008	protein_coding		FCRL3	0.256298	4.34556	12.4976	3.88763e-34	1.01765e-32	66.5741	protein_coding		TROAP	-0.285982	7.29881	-11.3034	1.81247e-28	4.64326e-27	53.5721	protein_coding		AKAP14	0.0862565	3.17595	8.9278	1.26445e-18	3.35871e-17	31.3269	protein_coding		U2SURP	0.469823	6.96823	16.2074	1.68036e-51	4.44166e-50	106.188	protein_coding		TROAP	0.392394	7.31569	15.2882	6.19408e-47
TRAIP	0.295039	5.65645	15.2327	9.15471e-49	2.40807e-47	99.8232	protein_coding		BEND3	-0.288671	7.02672	-12.4894	4.27037e-34	1.11649e-32	66.481	protein_coding		PCDHB7	0.346781	4.4518	11.3014	1.85076e-28	4.73576e-27	53.5514	protein_coding		RFC2	0.273108	7.84514	8.92511	1.29389e-18	3.43269e-17	31.3042	protein_coding		EIF5B	0.452478	6.88488	16.2013	1.81198e-51	4.78373e-50	106.113	protein_coding		CD4	-0.194659	5.25835	-15.2869	6.28894e-47
DPT	-0.791548	5.68102	-15.2304	9.4319e-49	2.47797e-47	99.7935	protein_coding		INPP5K	0.220952	7.0073	12.486	4.43488e-34	1.1581e-32	66.4436	protein_coding		CCDC8	0.22842	5.50886	11.2974	1.9294e-28	4.92891e-27	53.5102	protein_coding		CAPS	-0.242819	5.78359	-8.92356	1.31123e-18	3.47445e-17	31.2911	protein_coding		ATR	0.471877	6.44047	16.1933	1.99864e-51	5.27008e-50	106.015	protein_coding		TRAIP	0.34099	5.70969	15.2791	6.90957e-47
URB2	0.31791	7.02687	15.2124	1.19755e-48	3.1424e-47	99.5561	protein_coding		TAF1B	-0.338547	4.85941	-12.485	4.48646e-34	1.17016e-32	66.4321	protein_coding		C4orf3	0.328005	9.00161	11.2973	1.9308e-28	4.92891e-27	53.5095	protein_coding		ARAP3	-0.201266	6.22872	-8.91581	1.40119e-18	3.70373e-17	31.2258	protein_coding		TBC1D30	0.479168	5.52514	16.1887	2.11608e-51	5.57295e-50	105.958	protein_coding		ROR2	-0.715366	4.63183	-15.2749	7.27316e-47
PUS7L	0.374453	6.18746	15.2091	1.25109e-48	3.27892e-47	99.5126	protein_coding		SAPCD2	-0.473769	8.46584	-12.4845	4.5108e-34	1.17509e-32	66.4268	protein_coding		KIF1B	0.209027	6.50803	11.2911	2.05991e-28	5.25229e-27	53.4454	protein_coding		CSTF2	0.268218	7.01431	8.91565	1.40314e-18	3.70436e-17	31.2245	protein_coding		LMOD1	-0.725426	5.51122	-16.1881	2.13098e-51	5.60536e-50	105.951	protein_coding		EID1	-0.561162	8.30675	-15.2695	7.76263e-47
TCF21	-0.456492	5.43494	-15.208	1.26944e-48	3.32298e-47	99.4981	protein_coding		BTNL3	0.490396	7.07655	12.4832	4.57757e-34	1.19105e-32	66.4122	protein_coding		TCEAL4	0.389371	9.10274	11.2901	2.08182e-28	5.30189e-27	53.4349	protein_coding		VANGL2	-0.535671	5.92515	-8.91367	1.42709e-18	3.763e-17	31.2078	protein_coding		MS4A1	-0.917479	4.48143	-16.1843	2.23321e-51	5.86712e-50	105.905	protein_coding		SVIL	-0.433986	6.78856	-15.2562	9.11981e-47
CSF2RA	-0.335921	4.89606	-15.1861	1.69255e-48	4.42519e-47	99.212	protein_coding		HDC	0.270127	5.28221	12.4827	4.60397e-34	1.19648e-32	66.4065	protein_coding		ZNF300P1	0.165903	4.07127	11.2883	2.12305e-28	5.40053e-27	53.4155	transcribed_unprocessed_pseudogene		CXCL16	0.375334	8.53047	8.90943	1.47986e-18	3.89352e-17	31.1721	protein_coding		SPATA5L1	0.471087	6.21594	16.1805	2.34086e-51	6.14248e-50	105.858	protein_coding		DEGS1	-0.623291	8.49752	-15.2553	9.22178e-47
SLC1A3	-0.304657	4.91861	-15.1832	1.75943e-48	4.59449e-47	99.1735	protein_coding		SSRP1	-0.271096	8.96405	-12.4794	4.7842e-34	1.24034e-32	66.3685	protein_coding		MAMDC2	0.621787	3.67049	11.2848	2.20191e-28	5.59456e-27	53.3794	protein_coding		SRBD1	0.295591	6.83367	8.9094	1.48019e-18	3.89352e-17	31.1718	protein_coding		NXN	-1.02495	7.83583	-16.177	2.44408e-51	6.40556e-50	105.815	protein_coding		HAVCR2	-0.261404	5.33869	-15.2527	9.51542e-47
[truncated: 16,871 more rows]
[truncated: 35 more columns]

## Sheet: Supplementary file 2e
Genes	Signatures	Correlation coefficient	p value
SPP1	TIDE	0.355093	5.92822e-45
[truncated: 237,841+ more rows]

## Sheet: Supplementary file 2f
gene	Kaplan-Meier method	Univariate cox analysis
[truncated: 21 more rows]

[truncated: 2 more sheets: Supplementary file 2g, Supplementary file 2h]
