# Supplementary material for: Comprehensive characterization of tumor microenvironment in colorectal cancer via molecular analysis
Source: eLife. 2023 Jun 2;12:e86032. doi: 10.7554/eLife.86032 (PMC10238095; doi:10.7554/eLife.86032)
Supplement: Supplementary file 3. — (a) The 335 CCCRC subtype-specific and cancer cell-intrinsic gene markers used to construct the pre-clinical model. (b) The 71 human colorectal cancer cell lines grouped according to CCCRC classification system. (c) A total of 80 upregulated subtype-specific genes used to construct the CCCRC classifier. (d) The performance of the CCCRC classifier in the CRC-AFFY and the CRC-RNAseq cohort. Lists of 86 human metabolism-related signatures, 10 oncogenic signatures and terminally exhausted T cell signature. (e) Transcription factors and chromatin modifiers in colorectal cancer. (f) Publicly available CRC molecular classification systems. (g) The datasets used to reveal the therapy strategies for four CCCRC subtypes. [file elife-86032-supp3.xlsx]

## Sheet: Supplementary file 3a
Gene	CCCRC
LRP4	C1
ACE2	C1
AZGP1	C1
GGH	C1
RNF43	C1
CDHR1	C1
OLFM4	C1
FAM3B	C1
SATB2	C1
ID1	C1
GNG4	C1
PHGDH	C1
SCML1	C1
GLCE	C1
CHN2	C1
SPAG1	C1
CKMT2	C1
ARID3A	C1
NR1I2	C1
RNF128	C1
LCN15	C1
CYP4F3	C1
MANSC1	C1
PRAP1	C1
GALNT6	C1
SGK2	C1
CXADR	C1
MYC	C1
ZNF121	C1
CLDN2	C1
CFTR	C1
NKD1	C1
CEMIP	C1
NETO2	C1
ANO9	C1
CYP2J2	C1
CYP2B6	C1
SYBU	C1
FOXA2	C1
DNMT3B	C1
FGFR3	C1
GDF15	C1
ESRP1	C1
PLEKHG4	C1
GOLT1A	C1
FGGY	C1
CEBPA	C1
GPX2	C1
SLC2A8	C1
DGAT2	C1
METTL7B	C1
CYP2S1	C1
GPR35	C1
CKB	C1
SLC7A6	C1
OCLN	C1
ACOX2	C1
SPIRE2	C1
GFPT1	C1
SP6	C1
APOBEC3B	C1
SERINC5	C1
ERMP1	C1
CYP2W1	C1
KHK	C1
KDM7A	C1
PABPC1L	C1
ANXA9	C1
FAAH	C1
FCGBP	C2
CEACAM7	C2
MUC2	C2
AKR1B10	C2
SLC26A3	C2
ST6GALNAC1	C2
TSPAN1	C2
IL2RG	C2
CXCL14	C2
SLC26A2	C2
CDHR5	C2
KLF4	C2
PI3	C2
AOC1	C2
AGR3	C2
MUC12	C2
C15orf48	C2
BCAS1	C2
CREB3L1	C2
PKIB	C2
CTSE	C2
ITM2C	C2
AKR1C3	C2
ATP2A3	C2
CA12	C2
ADIRF	C2
PRAC1	C2
CES2	C2
VIPR1	C2
TFF3	C2
ABCG2	C2
PTGER2	C2
C19orf33	C2
CD163L1	C2
POLD4	C2
CDC42EP5	C2
FXYD3	C2
CDA	C2
ALDH1A1	C2
MTMR11	C2
VILL	C2
COL17A1	C2
TFF1	C2
TMEM176B	C2
KLK11	C2
NELL2	C2
PADI2	C2
ARL14	C2
ZG16B	C2
B3GALT5	C2
ETHE1	C2
PAPSS2	C2
SYTL2	C2
PTPRH	C2
GJB4	C2
ST6GALNAC2	C2
PARM1	C2
SH3D21	C2
PTPRN2	C2
EPHB6	C2
MINK1	C2
MUC5B	C2
PPDPF	C2
GGT6	C2
MVP	C2
SLC22A18	C2
TFF2	C2
BCAR3	C2
ERN2	C2
IFI27L2	C2
MAOA	C2
ST3GAL4	C2
XBP1	C2
MIA	C2
IFT172	C2
SULT1A1	C2
AMN	C2
LGR6	C2
PYGB	C2
MBOAT2	C2
HSF4	C2
TBC1D2	C2
PLCD3	C2
KRT81	C2
WFDC2	C2
EMB	C2
AOAH	C2
ACAA2	C2
ATP6V0C	C2
AMIGO2	C3
FZD7	C3
CDKN1C	C3
PPBP	C3
TGFBI	C3
LAMB1	C3
SLC16A4	C3
SCRN1	C3
RHOBTB1	C3
TWSG1	C3
BNIP3	C3
HOXA5	C3
ZNF83	C3
FKBP10	C3
GJB2	C3
CCDC50	C3
KRT6A	C3
PCP4	C3
ANO1	C3
PCOLCE2	C3
KLK6	C3
TNFRSF11B	C3
SATB1	C3
SMOC2	C3
SMIM3	C3
LAMC2	C3
S100A2	C3
RBP1	C3
DAB2	C3
SFTA2	C3
PFN2	C3
BAMBI	C3
PHACTR3	C3
TCEAL8	C3
TUBB2B	C3
ALPK3	C3
RECQL	C3
BMP4	C3
SRPX2	C3
LARP6	C3
LEF1	C3
PIAS3	C3
ASAP1	C3
KRT6B	C3
MLF1	C3
MME	C3
PPL	C3
DDIT4	C3
HLTF	C3
PTPN13	C3
DDHD2	C3
DSG3	C3
C3orf14	C3
DCBLD2	C3
SCEL	C3
ACSL4	C3
CST6	C3
L3HYPDH	C3
RTN2	C3
PRRG1	C3
AFAP1	C3
GOLGA8A	C3
KIZ	C3
STXBP1	C3
SPRR1B	C3
TTC14	C3
DYNLT3	C3
DKK1	C3
PTK7	C3
PJA1	C3
EVA1C	C3
YAP1	C3
ABL2	C3
DST	C3
PPP3CA	C3
CTNNB1	C3
KLHL21	C3
SLCO3A1	C3
RGL2	C3
PCYOX1	C3
LEMD1	C3
PPFIBP1	C3
HOXB3	C3
NDRG1	C3
STEAP2	C3
TJP1	C3
PEG10	C3
KLHL24	C3
ABHD2	C3
TNFRSF19	C3
ULBP2	C3
GZMB	C4
FBXO6	C4
RPL22L1	C4
USP18	C4
CALB1	C4
PSMB8	C4
TAP2	C4
PMAIP1	C4
VSNL1	C4
ERAP2	C4
PLEKHS1	C4
TMPRSS3	C4
NMI	C4
CBR3	C4
HS6ST2	C4
SLC18B1	C4
FOXD1	C4
SGPP2	C4
DPP4	C4
IFIH1	C4
IGF2BP3	C4
ME2	C4
KCTD9	C4
ADA	C4
TFAP2A	C4
MYEOV	C4
TNFSF9	C4
OAS3	C4
SOCS6	C4
FUOM	C4
PRKX	C4
GDA	C4
WDR54	C4
SMCHD1	C4
MAGEA6	C4
LPIN1	C4
PIWIL1	C4
SLC25A22	C4
TNNT1	C4
IFITM1	C4
HK2	C4
CPS1	C4
OXCT1	C4
HERC6	C4
STEAP1	C4
NEIL2	C4
CDCP1	C4
AGR2	C4
FECH	C4
GSDMB	C4
ERAP1	C4
DMKN	C4
TRIM15	C4
FOXA1	C4
MRPS21	C4
FBXL16	C4
TRIM16	C4
SEC11C	C4
TSPO	C4
TRIM5	C4
RAB38	C4
SLC38A5	C4
CADPS2	C4
KCNK1	C4
TSPAN13	C4
ALDH16A1	C4
RPS27L	C4
KIF13A	C4
TRNP1	C4
ENOSF1	C4
HSBP1L1	C4
SP140L	C4
ARHGAP4	C4
HSD17B1	C4
FBXL15	C4
THOC1	C4
NQO2	C4
HOXC10	C4
CBR1	C4
CNNM4	C4
PARVB	C4
TNFRSF10B	C4
HDHD2	C4
SOX2	C4
FKBP5	C4
RAC3	C4

## Sheet: Supplementary file 3b
id	CCCRC	cell_line_name	Fraction Genome Altered (FGA)	Tumor mutation burden (TMB) (nonsynonymous)	Microsatellite (MSI) status
ACH-000467	C1	HCC56	0.5288	12.9667	MSS
ACH-000252	C1	LS1034	0.3562	12.4	MSS
ACH-001459	C1	C80	NA	7.13333	MSS
ACH-000470	C1	SW1463	0.4182	13.2	MSS
ACH-000089	C1	NCIH684	NA	NA	MSS
ACH-000982	C1	GP2D	0.0418	169.2	MSI
ACH-000820	C1	SW403	0.4759	13.0667	MSS
ACH-000680	C1	SW948	0.588	15.0333	MSS
ACH-000722	C1	SNUC1	0.5149	15.4667	MSS
ACH-000926	C1	HT55	0.5524	37.2667	MSS
ACH-001458	C1	C75	NA	8.33333	MSS
ACH-001461	C1	C99	NA	6.9	MSS
ACH-000963	C1	CCK81	0.3967	102.6	MSI
ACH-000360	C1	NCIH508	0.4813	10.7333	MSS
ACH-001345	C1	GP5D	NA	165.2	MSI
ACH-000342	C1	CL14	0.6185	8	MSS
ACH-000009	C1	C2BBE1	0.411	10.7667	MSS
ACH-000381	C1	T84	0.5082	12.6	MSS
ACH-000007	C2	LS513	0.2636	13.9	MSS
ACH-000798	C2	CL40	0.1004	10.1667	MSI
ACH-001456	C2	C125PM	NA	7.26667	MSS
ACH-000708	C2	SNU283	0.6553	9.3	MSS
ACH-000532	C2	SNU61	0.6623	8	MSS
ACH-000895	C2	CL34	0.149	42.7333	MSI
ACH-000400	C2	SKCO1	0.552	9.9	MSS
ACH-001460	C2	C84	NA	7.56667	MSS
ACH-000552	C2	HT29	0.4374	13.8667	MSS
ACH-000489	C2	SW1116	0.6339	12.0333	MSS
ACH-002659	C2	JVE127	NA	NA	MSS
ACH-000999	C2	SNU1040	0.06	638.833	MSI
ACH-000412	C3	SNU1197	0.3972	7.8	MSS
ACH-001399	C3	SW626	NA	NA	MSS
ACH-002023	C3	TGBC18TKB	NA	NA	NA
ACH-000286	C3	SNU1033	0.4968	7.7	MSS
ACH-000249	C3	CL11	0.1879	6.1	MSS
ACH-000935	C3	MDST8	0.5583	25.8667	MSS
ACH-000501	C3	LS123	0.7928	13.3333	MSS
ACH-000842	C3	SW480	0.9221	18.8	MSS
ACH-000296	C3	OUMS23	0.5013	11.3667	MSS
ACH-000350	C3	COLO678	0.4583	13.1667	MSS
ACH-000683	C3	SNU503	0.7392	14.9	MSS
ACH-000202	C3	COLO320	0.7352	10.9333	MSS
ACH-000236	C3	SW1417	0.5683	8.5	MSS
ACH-000421	C3	SW837	0.3515	7.56667	MSS
ACH-000403	C3	NCIH747	0.6423	6.3	MSI
ACH-001454	C3	C10	NA	7.23333	MSI
ACH-002025	C3	TT1TKB	NA	NA	NA
ACH-000565	C3	RCM1	0.4152	12.9333	MSS
ACH-000253	C3	COLO201	NA	8.86667	MSS
ACH-000651	C3	SW620	0.2891	17.7667	MSS
ACH-001061	C3	DLD1	NA	NA	MSI
ACH-000003	C3	CACO2	NA	5.6	MSS
ACH-002024	C3	ECC4	NA	NA	NA
ACH-000950	C4	LOVO	0.2092	77.5	MSI
ACH-000971	C4	HCT116	0.082	106.5	MSI
ACH-000997	C4	HCT15	0.0269	259.667	MSI
ACH-000943	C4	RKO	0.1421	114.667	MSI
ACH-000958	C4	SW48	0.1111	92.8	MSI
ACH-000970	C4	SNUC5	0.0966	100.033	MSI
ACH-000959	C4	SNUC4	0.0337	73.4667	MSI
ACH-000967	C4	SNUC2A	0.1034	104.167	MSI
ACH-000998	C4	CW2	0.0293	274.967	MSI
ACH-000957	C4	LS180	0.026	76.0667	MSI
ACH-000985	C4	LS411N	0.2807	182.067	MSI
ACH-000989	C4	SNU175	0.0927	183.867	MSI
ACH-000986	C4	HT115	0.1873	192.2	MSS
ACH-000955	C4	SNU407	0.0895	88.3333	MSI
ACH-000969	C4	KM12	0.1304	110.7	MSI
ACH-000491	C4	NCIH716	0.6137	14.1	MSS
ACH-001786	C4	SNU1544	NA	NA	MSI
ACH-000991	C4	SNU81	0.0815	248.867	MSI
Note: NA: not available

## Sheet: Supplementary file 3c
Gene	CCCRC
CCT6A	C1
POLR1B	C1
GGCT	C1
OTUD6B	C1
PUS7	C1
FLVCR1	C1
DCAF13	C1
HEATR1	C1
HSPD1	C1
TRIM24	C1
CSE1L	C1
NOP58	C1
TFAM	C1
EIF3J	C1
PUS7L	C1
TPX2	C1
SPIN4	C1
TMEM97	C1
UPF3B	C1
PRMT3	C1
CD79A	C2
CCL19	C2
MOB3A	C2
GPSM3	C2
SCARA5	C2
DERL3	C2
MFNG	C2
WAS	C2
FUCA1	C2
FOLR2	C2
CD1C	C2
LILRB3	C2
CD19	C2
CTSG	C2
LYL1	C2
RASAL3	C2
RBP5	C2
BEST2	C2
NXPE4	C2
VPREB3	C2
COL8A1	C3
CTHRC1	C3
COL10A1	C3
INHBA	C3
ZNF532	C3
RAI14	C3
COL12A1	C3
EDNRA	C3
FN1	C3
CD109	C3
NAV1	C3
CALCRL	C3
SMARCA1	C3
ADAMTS5	C3
COL11A1	C3
ZNF423	C3
ITGAV	C3
LOX	C3
TGFBI	C3
PCDH17	C3
GNLY	C4
APOL6	C4
LAP3	C4
TAP2	C4
CXCL11	C4
PARP9	C4
PSMB8	C4
BATF2	C4
ETV7	C4
GZMB	C4
LYSMD2	C4
IL15	C4
FBXO6	C4
PARP14	C4
JAK2	C4
NMI	C4
IFIT5	C4
DTX3L	C4
MICB	C4
PARP12	C4

## Sheet: Supplementary file 3d
CCCRC classifier (xgboost algorithm)								CCCRC classifier (xgboost algorithm)
the CRC-AFFY cohort (Affymetrix platform)								the CRC-RNAseq cohort (RNA-sequencing platform)
Overall accuracy: 0.9524; 95% CI : (0.9403, 0.9627)								Overall accuracy: 0.7283; 95% CI : (0.6943, 0.7604)
		Consensus clustering result								PAMR classifier result
		C1	C2	C3	C4	Total				C1	C2	C3	C4	Total
Predicted CCCRC	C1	509	5	9	6	529		Predicted CCCRC	C1	213	2	14	21	250
	C2	6	282	4	5	297			C2	11	103	21	38	173
	C3	2	13	334	8	357			C3	38	26	105	3	172
	C4	5	3	4	276	288			C4	12	8	3	107	130
	Total	522	303	351	295	1471			Total	274	139	143	169	725
		C1	C2	C3	C4					C1	C2	C3	C4
Sensitivity		0.9751	0.9307	0.9516	0.9356			Sensitivity		0.7774	0.741	0.7343	0.6331
Specificity		0.9789	0.9872	0.9795	0.9898			Specificity		0.918	0.8805	0.8849	0.9586
Positive Predictive Value		0.9622	0.9495	0.9356	0.9583			Positive Predictive Value		0.852	0.5954	0.6105	0.8231
Negative Predictive Value		0.9862	0.9821	0.9847	0.9839			Negative Predictive Value		0.8716	0.9348	0.9313	0.8958
Prevalence		0.3549	0.206	0.2386	0.2005			Prevalence		0.3779	0.1917	0.1972	0.2331
Detection Rate		0.346	0.1917	0.2271	0.1876			Detection Rate		0.2938	0.1421	0.1448	0.1476
Detection Prevalence		0.3596	0.2019	0.2427	0.1958			Detection Prevalence		0.3448	0.2386	0.2372	0.1793
Balanced Accuracy		0.977	0.9589	0.9655	0.9627			Balanced Accuracy		0.8477	0.8108	0.8096	0.7959

## Sheet: Supplementary file 3e
genes	signatures
GFPT1	Alanine, aspartate and glutamate metabolism
GFPT2	Alanine, aspartate and glutamate metabolism
ALDH4A1	Alanine, aspartate and glutamate metabolism
GOT1	Alanine, aspartate and glutamate metabolism
GOT2	Alanine, aspartate and glutamate metabolism
ASL	Alanine, aspartate and glutamate metabolism
ASS1	Alanine, aspartate and glutamate metabolism
GPT	Alanine, aspartate and glutamate metabolism
GPT2	Alanine, aspartate and glutamate metabolism
GLS	Alanine, aspartate and glutamate metabolism
GLS2	Alanine, aspartate and glutamate metabolism
GLUD1	Alanine, aspartate and glutamate metabolism
GLUD2	Alanine, aspartate and glutamate metabolism
GLUL	Alanine, aspartate and glutamate metabolism
CPS1	Alanine, aspartate and glutamate metabolism
ABAT	Alanine, aspartate and glutamate metabolism
GAD1	Alanine, aspartate and glutamate metabolism
GAD2	Alanine, aspartate and glutamate metabolism
ALDH5A1	Alanine, aspartate and glutamate metabolism
AGXT2	Alanine, aspartate and glutamate metabolism
IL4I1	Alanine, aspartate and glutamate metabolism
AGXT	Alanine, aspartate and glutamate metabolism
ASPA	Alanine, aspartate and glutamate metabolism
ADSL	Alanine, aspartate and glutamate metabolism
ADSS	Alanine, aspartate and glutamate metabolism
ADSSL1	Alanine, aspartate and glutamate metabolism
PPAT	Alanine, aspartate and glutamate metabolism
CAD	Alanine, aspartate and glutamate metabolism
ASNS	Alanine, aspartate and glutamate metabolism
DDO	Alanine, aspartate and glutamate metabolism
FOLH1	Alanine, aspartate and glutamate metabolism
NAT8L	Alanine, aspartate and glutamate metabolism
NIT2	Alanine, aspartate and glutamate metabolism
RIMKLA	Alanine, aspartate and glutamate metabolism
RIMKLB	Alanine, aspartate and glutamate metabolism
PLA2G10	alpha-Linolenic acid metabolism
PLA2G12A	alpha-Linolenic acid metabolism
PLA2G12B	alpha-Linolenic acid metabolism
PLA2G16	alpha-Linolenic acid metabolism
PLA2G1B	alpha-Linolenic acid metabolism
PLA2G2A	alpha-Linolenic acid metabolism
PLA2G2C	alpha-Linolenic acid metabolism
PLA2G2D	alpha-Linolenic acid metabolism
PLA2G2E	alpha-Linolenic acid metabolism
PLA2G2F	alpha-Linolenic acid metabolism
PLA2G3	alpha-Linolenic acid metabolism
PLA2G4A	alpha-Linolenic acid metabolism
PLA2G4B	alpha-Linolenic acid metabolism
PLA2G4C	alpha-Linolenic acid metabolism
PLA2G4D	alpha-Linolenic acid metabolism
PLA2G4E	alpha-Linolenic acid metabolism
PLA2G4F	alpha-Linolenic acid metabolism
PLA2G5	alpha-Linolenic acid metabolism
PLA2G6	alpha-Linolenic acid metabolism
PLB1	alpha-Linolenic acid metabolism
FADS2	alpha-Linolenic acid metabolism
ACOX1	alpha-Linolenic acid metabolism
ACOX3	alpha-Linolenic acid metabolism
ACAA1	alpha-Linolenic acid metabolism
UGDH	Amino sugar and nucleotide sugar metabolism
FPGT	Amino sugar and nucleotide sugar metabolism
FUK	Amino sugar and nucleotide sugar metabolism
GMDS	Amino sugar and nucleotide sugar metabolism
GMPPA	Amino sugar and nucleotide sugar metabolism
GMPPB	Amino sugar and nucleotide sugar metabolism
MPI	Amino sugar and nucleotide sugar metabolism
PMM1	Amino sugar and nucleotide sugar metabolism
PMM2	Amino sugar and nucleotide sugar metabolism
TSTA3	Amino sugar and nucleotide sugar metabolism
HK1	Amino sugar and nucleotide sugar metabolism
HK2	Amino sugar and nucleotide sugar metabolism
HK3	Amino sugar and nucleotide sugar metabolism
HKDC1	Amino sugar and nucleotide sugar metabolism
GALE	Amino sugar and nucleotide sugar metabolism
GALK1	Amino sugar and nucleotide sugar metabolism
GALT	Amino sugar and nucleotide sugar metabolism
PGM1	Amino sugar and nucleotide sugar metabolism
PGM2	Amino sugar and nucleotide sugar metabolism
GCK	Amino sugar and nucleotide sugar metabolism
UGP2	Amino sugar and nucleotide sugar metabolism
GPI	Amino sugar and nucleotide sugar metabolism
HEXA	Amino sugar and nucleotide sugar metabolism
HEXB	Amino sugar and nucleotide sugar metabolism
AMDHD2	Amino sugar and nucleotide sugar metabolism
CHIA	Amino sugar and nucleotide sugar metabolism
CHIT1	Amino sugar and nucleotide sugar metabolism
CMAS	Amino sugar and nucleotide sugar metabolism
CYB5R1	Amino sugar and nucleotide sugar metabolism
CYB5R2	Amino sugar and nucleotide sugar metabolism
CYB5R3	Amino sugar and nucleotide sugar metabolism
CYB5R4	Amino sugar and nucleotide sugar metabolism
CYB5RL	Amino sugar and nucleotide sugar metabolism
GNE	Amino sugar and nucleotide sugar metabolism
GNPDA1	Amino sugar and nucleotide sugar metabolism
GNPDA2	Amino sugar and nucleotide sugar metabolism
GNPNAT1	Amino sugar and nucleotide sugar metabolism
NAGK	Amino sugar and nucleotide sugar metabolism
NANP	Amino sugar and nucleotide sugar metabolism
NANS	Amino sugar and nucleotide sugar metabolism
NPL	Amino sugar and nucleotide sugar metabolism
PGM3	Amino sugar and nucleotide sugar metabolism
RENBP	Amino sugar and nucleotide sugar metabolism
UAP1	Amino sugar and nucleotide sugar metabolism
UAP1L1	Amino sugar and nucleotide sugar metabolism
UXS1	Amino sugar and nucleotide sugar metabolism
GFPT1	Amino sugar and nucleotide sugar metabolism
GFPT2	Amino sugar and nucleotide sugar metabolism
CYP2E1	Arachidonic acid metabolism
HPGDS	Arachidonic acid metabolism
CYP2C19	Arachidonic acid metabolism
CYP2C9	Arachidonic acid metabolism
CYP2C8	Arachidonic acid metabolism
CYP2B6	Arachidonic acid metabolism
CYP4A11	Arachidonic acid metabolism
CYP4A22	Arachidonic acid metabolism
CBR1	Arachidonic acid metabolism
AKR1C3	Arachidonic acid metabolism
GPX1	Arachidonic acid metabolism
GPX2	Arachidonic acid metabolism
GPX3	Arachidonic acid metabolism
GPX5	Arachidonic acid metabolism
GPX6	Arachidonic acid metabolism
GPX7	Arachidonic acid metabolism
GPX8	Arachidonic acid metabolism
GGT1	Arachidonic acid metabolism
GGT5	Arachidonic acid metabolism
ALOX15	Arachidonic acid metabolism
CYP2J2	Arachidonic acid metabolism
CBR3	Arachidonic acid metabolism
ALOX12	Arachidonic acid metabolism
ALOX12B	Arachidonic acid metabolism
ALOX15B	Arachidonic acid metabolism
ALOX5	Arachidonic acid metabolism
C1orf93	Arachidonic acid metabolism
CYP2U1	Arachidonic acid metabolism
CYP4F2	Arachidonic acid metabolism
CYP4F3	Arachidonic acid metabolism
CYP4F8	Arachidonic acid metabolism
EPHX2	Arachidonic acid metabolism
LTA4H	Arachidonic acid metabolism
LTC4S	Arachidonic acid metabolism
PTGDS	Arachidonic acid metabolism
PTGES	Arachidonic acid metabolism
PTGES2	Arachidonic acid metabolism
PTGES3	Arachidonic acid metabolism
PTGIS	Arachidonic acid metabolism
PTGS1	Arachidonic acid metabolism
PTGS2	Arachidonic acid metabolism
TBXAS1	Arachidonic acid metabolism
PLA2G10	Arachidonic acid metabolism
PLA2G12A	Arachidonic acid metabolism
PLA2G12B	Arachidonic acid metabolism
PLA2G16	Arachidonic acid metabolism
PLA2G1B	Arachidonic acid metabolism
PLA2G2A	Arachidonic acid metabolism
PLA2G2C	Arachidonic acid metabolism
PLA2G2D	Arachidonic acid metabolism
PLA2G2E	Arachidonic acid metabolism
PLA2G2F	Arachidonic acid metabolism
PLA2G3	Arachidonic acid metabolism
PLA2G4A	Arachidonic acid metabolism
PLA2G4B	Arachidonic acid metabolism
PLA2G4C	Arachidonic acid metabolism
PLA2G4D	Arachidonic acid metabolism
PLA2G4E	Arachidonic acid metabolism
PLA2G4F	Arachidonic acid metabolism
PLA2G5	Arachidonic acid metabolism
PLA2G6	Arachidonic acid metabolism
PLB1	Arachidonic acid metabolism
ARG1	Arginine and proline metabolism
ARG2	Arginine and proline metabolism
NOS1	Arginine and proline metabolism
NOS2	Arginine and proline metabolism
NOS3	Arginine and proline metabolism
ALDH7A1	Arginine and proline metabolism
ALDH1B1	Arginine and proline metabolism
ALDH2	Arginine and proline metabolism
ALDH3A2	Arginine and proline metabolism
ALDH9A1	Arginine and proline metabolism
SMOX	Arginine and proline metabolism
SMS	Arginine and proline metabolism
SRM	Arginine and proline metabolism
CARNS1	Arginine and proline metabolism
CNDP1	Arginine and proline metabolism
CNDP2	Arginine and proline metabolism
AMD1	Arginine and proline metabolism
DAO	Arginine and proline metabolism
MAOA	Arginine and proline metabolism
MAOB	Arginine and proline metabolism
LAP3	Arginine and proline metabolism
ODC1	Arginine and proline metabolism
GAMT	Arginine and proline metabolism
GATM	Arginine and proline metabolism
DHDPSL	Arginine and proline metabolism
ABP1	Arginine and proline metabolism
ADC	Arginine and proline metabolism
AGMAT	Arginine and proline metabolism
ALDH18A1	Arginine and proline metabolism
C14orf149	Arginine and proline metabolism
CKB	Arginine and proline metabolism
CKM	Arginine and proline metabolism
CKMT1A	Arginine and proline metabolism
CKMT1B	Arginine and proline metabolism
CKMT2	Arginine and proline metabolism
OAT	Arginine and proline metabolism
P4HA1	Arginine and proline metabolism
P4HA2	Arginine and proline metabolism
P4HA3	Arginine and proline metabolism
PRODH	Arginine and proline metabolism
PRODH2	Arginine and proline metabolism
PYCR1	Arginine and proline metabolism
PYCR2	Arginine and proline metabolism
PYCRL	Arginine and proline metabolism
SAT1	Arginine and proline metabolism
SAT2	Arginine and proline metabolism
ALDH4A1	Arginine and proline metabolism
GOT1	Arginine and proline metabolism
GOT2	Arginine and proline metabolism
ACY1	Arginine biosynthesis
NAGS	Arginine biosynthesis
OTC	Arginine biosynthesis
ASL	Arginine biosynthesis
ASS1	Arginine biosynthesis
GPT	Arginine biosynthesis
GPT2	Arginine biosynthesis
GLS	Arginine biosynthesis
GLS2	Arginine biosynthesis
GLUD1	Arginine biosynthesis
GLUD2	Arginine biosynthesis
GLUL	Arginine biosynthesis
CPS1	Arginine biosynthesis
ARG1	Arginine biosynthesis
ARG2	Arginine biosynthesis
NOS1	Arginine biosynthesis
NOS2	Arginine biosynthesis
NOS3	Arginine biosynthesis
GOT1	Arginine biosynthesis
GOT2	Arginine biosynthesis
UGT1A1	Ascorbate and aldarate metabolism
UGT1A10	Ascorbate and aldarate metabolism
UGT1A3	Ascorbate and aldarate metabolism
UGT1A4	Ascorbate and aldarate metabolism
UGT1A5	Ascorbate and aldarate metabolism
UGT1A6	Ascorbate and aldarate metabolism
UGT1A7	Ascorbate and aldarate metabolism
UGT1A8	Ascorbate and aldarate metabolism
UGT1A9	Ascorbate and aldarate metabolism
UGT2A1	Ascorbate and aldarate metabolism
UGT2A2	Ascorbate and aldarate metabolism
UGT2A3	Ascorbate and aldarate metabolism
UGT2B10	Ascorbate and aldarate metabolism
UGT2B11	Ascorbate and aldarate metabolism
UGT2B15	Ascorbate and aldarate metabolism
UGT2B17	Ascorbate and aldarate metabolism
UGT2B28	Ascorbate and aldarate metabolism
UGT2B4	Ascorbate and aldarate metabolism
UGT2B7	Ascorbate and aldarate metabolism
MIOX	Ascorbate and aldarate metabolism
RGN	Ascorbate and aldarate metabolism
UGDH	Ascorbate and aldarate metabolism
ALDH7A1	Ascorbate and aldarate metabolism
ALDH1B1	Ascorbate and aldarate metabolism
ALDH2	Ascorbate and aldarate metabolism
ALDH3A2	Ascorbate and aldarate metabolism
ALDH9A1	Ascorbate and aldarate metabolism
HADHA	beta-Alanine metabolism
ECHS1	beta-Alanine metabolism
EHHADH	beta-Alanine metabolism
ALDH1A3	beta-Alanine metabolism
ALDH3A1	beta-Alanine metabolism
ALDH3B1	beta-Alanine metabolism
ALDH3B2	beta-Alanine metabolism
DPYD	beta-Alanine metabolism
DPYS	beta-Alanine metabolism
UPB1	beta-Alanine metabolism
ACADM	beta-Alanine metabolism
AOC2	beta-Alanine metabolism
AOC3	beta-Alanine metabolism
ALDH6A1	beta-Alanine metabolism
GADL1	beta-Alanine metabolism
MLYCD	beta-Alanine metabolism
HIBCH	beta-Alanine metabolism
ABAT	beta-Alanine metabolism
GAD1	beta-Alanine metabolism
GAD2	beta-Alanine metabolism
SMOX	beta-Alanine metabolism
SMS	beta-Alanine metabolism
SRM	beta-Alanine metabolism
CARNS1	beta-Alanine metabolism
CNDP1	beta-Alanine metabolism
CNDP2	beta-Alanine metabolism
ALDH7A1	beta-Alanine metabolism
ALDH1B1	beta-Alanine metabolism
ALDH2	beta-Alanine metabolism
ALDH3A2	beta-Alanine metabolism
ALDH9A1	beta-Alanine metabolism
ACOT1	Biosynthesis of unsaturated fatty acids
ACOT2	Biosynthesis of unsaturated fatty acids
ACOT4	Biosynthesis of unsaturated fatty acids
ACOT7	Biosynthesis of unsaturated fatty acids
ELOVL2	Biosynthesis of unsaturated fatty acids
ELOVL5	Biosynthesis of unsaturated fatty acids
ELOVL6	Biosynthesis of unsaturated fatty acids
PTPLA	Biosynthesis of unsaturated fatty acids
PTPLAD1	Biosynthesis of unsaturated fatty acids
PTPLAD2	Biosynthesis of unsaturated fatty acids
PTPLB	Biosynthesis of unsaturated fatty acids
TECR	Biosynthesis of unsaturated fatty acids
HSD17B12	Biosynthesis of unsaturated fatty acids
BAAT	Biosynthesis of unsaturated fatty acids
FADS1	Biosynthesis of unsaturated fatty acids
PECR	Biosynthesis of unsaturated fatty acids
SCD	Biosynthesis of unsaturated fatty acids
SCD5	Biosynthesis of unsaturated fatty acids
FADS2	Biosynthesis of unsaturated fatty acids
ACOX1	Biosynthesis of unsaturated fatty acids
ACOX3	Biosynthesis of unsaturated fatty acids
ACAA1	Biosynthesis of unsaturated fatty acids
HADHA	Biosynthesis of unsaturated fatty acids
OXSM	Biotin metabolism
BTD	Biotin metabolism
HLCS	Biotin metabolism
ACAT2	Butanoate metabolism
HMGCS1	Butanoate metabolism
HADH	Butanoate metabolism
ACAT1	Butanoate metabolism
ACADS	Butanoate metabolism
BDH1	Butanoate metabolism
BDH2	Butanoate metabolism
HMGCS2	Butanoate metabolism
HMGCL	Butanoate metabolism
HMGCLL1	Butanoate metabolism
OXCT1	Butanoate metabolism
OXCT2	Butanoate metabolism
AACS	Butanoate metabolism
ACSM1	Butanoate metabolism
ACSM2	Butanoate metabolism
ACSM2A	Butanoate metabolism
ACSM3	Butanoate metabolism
ACSM4	Butanoate metabolism
ACSM5	Butanoate metabolism
C10orf129	Butanoate metabolism
L2HGDH	Butanoate metabolism
ALDH5A1	Butanoate metabolism
ECHS1	Butanoate metabolism
EHHADH	Butanoate metabolism
ABAT	Butanoate metabolism
GAD1	Butanoate metabolism
GAD2	Butanoate metabolism
HADHA	Butanoate metabolism
CYP2A6	Caffeine metabolism
CYP1A2	Caffeine metabolism
NAT1	Caffeine metabolism
NAT2	Caffeine metabolism
XDH	Caffeine metabolism
CYP51A1	Cholesterol Biosynthesis
DHCR24	Cholesterol Biosynthesis
DHCR7	Cholesterol Biosynthesis
EBP	Cholesterol Biosynthesis
FDFT1	Cholesterol Biosynthesis
LIPA	Cholesterol Biosynthesis
LSS	Cholesterol Biosynthesis
NSDHL	Cholesterol Biosynthesis
SOAT1	Cholesterol Biosynthesis
SQLE	Cholesterol Biosynthesis
TM7SF2	Cholesterol Biosynthesis
HSD17B7	Cholesterol Biosynthesis
FDPS	Cholesterol Biosynthesis
GGPS1	Cholesterol Biosynthesis
HMGCR	Cholesterol Biosynthesis
IDI1	Cholesterol Biosynthesis
MVD	Cholesterol Biosynthesis
MVK	Cholesterol Biosynthesis
PMVK	Cholesterol Biosynthesis
LBR	Cholesterol Biosynthesis
SC4MOL	Cholesterol Biosynthesis
SC5DL	Cholesterol Biosynthesis
ACAT2	Cholesterol Biosynthesis
HMGCS1	Cholesterol Biosynthesis
CBS	Cysteine and methionine metabolism
LDHA	Cysteine and methionine metabolism
LDHAL6A	Cysteine and methionine metabolism
LDHAL6B	Cysteine and methionine metabolism
LDHB	Cysteine and methionine metabolism
LDHC	Cysteine and methionine metabolism
MDH2	Cysteine and methionine metabolism
GCLC	Cysteine and methionine metabolism
GCLM	Cysteine and methionine metabolism
GSS	Cysteine and methionine metabolism
BHMT	Cysteine and methionine metabolism
CTH	Cysteine and methionine metabolism
SDS	Cysteine and methionine metabolism
SDSL	Cysteine and methionine metabolism
MDH1	Cysteine and methionine metabolism
MTR	Cysteine and methionine metabolism
BCAT1	Cysteine and methionine metabolism
BCAT2	Cysteine and methionine metabolism
TAT	Cysteine and methionine metabolism
MPST	Cysteine and methionine metabolism
TST	Cysteine and methionine metabolism
CDO1	Cysteine and methionine metabolism
ADI1	Cysteine and methionine metabolism
AHCY	Cysteine and methionine metabolism
AHCYL1	Cysteine and methionine metabolism
AHCYL2	Cysteine and methionine metabolism
APIP	Cysteine and methionine metabolism
BHMT2	Cysteine and methionine metabolism
DNMT1	Cysteine and methionine metabolism
DNMT3A	Cysteine and methionine metabolism
DNMT3B	Cysteine and methionine metabolism
ENOPH1	Cysteine and methionine metabolism
MAT1A	Cysteine and methionine metabolism
MAT2A	Cysteine and methionine metabolism
MAT2B	Cysteine and methionine metabolism
MRI1	Cysteine and methionine metabolism
MTAP	Cysteine and methionine metabolism
AGXT2	Cysteine and methionine metabolism
IL4I1	Cysteine and methionine metabolism
AMD1	Cysteine and methionine metabolism
CBS	Cysteine and methionine metabolism
SMS	Cysteine and methionine metabolism
SRM	Cysteine and methionine metabolism
GOT1	Cysteine and methionine metabolism
GOT2	Cysteine and methionine metabolism
DAO	D-Arginine and D-ornithine metabolism
C14orf159	D-Glutamine and D-glutamate metabolism
GLS	D-Glutamine and D-glutamate metabolism
GLS2	D-Glutamine and D-glutamate metabolism
GLUD1	D-Glutamine and D-glutamate metabolism
GLUD2	D-Glutamine and D-glutamate metabolism
CYP2D6	Drug metabolism - cytochrome P450
GSTA1	Drug metabolism - cytochrome P450
GSTA2	Drug metabolism - cytochrome P450
GSTA3	Drug metabolism - cytochrome P450
GSTA4	Drug metabolism - cytochrome P450
GSTA5	Drug metabolism - cytochrome P450
GSTM1	Drug metabolism - cytochrome P450
GSTM2	Drug metabolism - cytochrome P450
GSTM3	Drug metabolism - cytochrome P450
GSTM4	Drug metabolism - cytochrome P450
GSTM5	Drug metabolism - cytochrome P450
GSTO1	Drug metabolism - cytochrome P450
GSTO2	Drug metabolism - cytochrome P450
GSTP1	Drug metabolism - cytochrome P450
GSTT1	Drug metabolism - cytochrome P450
GSTT2	Drug metabolism - cytochrome P450
GSTT2B	Drug metabolism - cytochrome P450
MGST1	Drug metabolism - cytochrome P450
MGST2	Drug metabolism - cytochrome P450
MGST3	Drug metabolism - cytochrome P450
CYP3A4	Drug metabolism - cytochrome P450
ADH1A	Drug metabolism - cytochrome P450
ADH1B	Drug metabolism - cytochrome P450
ADH1C	Drug metabolism - cytochrome P450
ADH4	Drug metabolism - cytochrome P450
ADH5	Drug metabolism - cytochrome P450
ADH6	Drug metabolism - cytochrome P450
ADH7	Drug metabolism - cytochrome P450
GSTK1	Drug metabolism - cytochrome P450
CYP2D7	Drug metabolism - cytochrome P450
CYP3A5	Drug metabolism - cytochrome P450
AOX1	Drug metabolism - cytochrome P450
FMO1	Drug metabolism - cytochrome P450
FMO2	Drug metabolism - cytochrome P450
FMO3	Drug metabolism - cytochrome P450
FMO4	Drug metabolism - cytochrome P450
FMO5	Drug metabolism - cytochrome P450
CYP2E1	Drug metabolism - cytochrome P450
HPGDS	Drug metabolism - cytochrome P450
CYP2C19	Drug metabolism - cytochrome P450
CYP2C9	Drug metabolism - cytochrome P450
CYP2C8	Drug metabolism - cytochrome P450
CYP2B6	Drug metabolism - cytochrome P450
MAOA	Drug metabolism - cytochrome P450
MAOB	Drug metabolism - cytochrome P450
UGT1A1	Drug metabolism - cytochrome P450
UGT1A10	Drug metabolism - cytochrome P450
UGT1A3	Drug metabolism - cytochrome P450
UGT1A4	Drug metabolism - cytochrome P450
UGT1A5	Drug metabolism - cytochrome P450
UGT1A6	Drug metabolism - cytochrome P450
UGT1A7	Drug metabolism - cytochrome P450
UGT1A8	Drug metabolism - cytochrome P450
UGT1A9	Drug metabolism - cytochrome P450
UGT2A1	Drug metabolism - cytochrome P450
UGT2A2	Drug metabolism - cytochrome P450
UGT2A3	Drug metabolism - cytochrome P450
UGT2B10	Drug metabolism - cytochrome P450
UGT2B11	Drug metabolism - cytochrome P450
UGT2B15	Drug metabolism - cytochrome P450
UGT2B17	Drug metabolism - cytochrome P450
UGT2B28	Drug metabolism - cytochrome P450
UGT2B4	Drug metabolism - cytochrome P450
UGT2B7	Drug metabolism - cytochrome P450
ALDH1A3	Drug metabolism - cytochrome P450
ALDH3A1	Drug metabolism - cytochrome P450
ALDH3B1	Drug metabolism - cytochrome P450
ALDH3B2	Drug metabolism - cytochrome P450
CYP2A6	Drug metabolism - cytochrome P450
CYP1A2	Drug metabolism - cytochrome P450
CYP2D6	Drug metabolism - cytochrome P450
RRM1	Drug metabolism - other enzymes
RRM2	Drug metabolism - other enzymes
RRM2B	Drug metabolism - other enzymes
GUSB	Drug metabolism - other enzymes
GMPS	Drug metabolism - other enzymes
HPRT1	Drug metabolism - other enzymes
IMPDH1	Drug metabolism - other enzymes
IMPDH2	Drug metabolism - other enzymes
ITPA	Drug metabolism - other enzymes
NME1	Drug metabolism - other enzymes
NME2	Drug metabolism - other enzymes
NME3	Drug metabolism - other enzymes
NME4	Drug metabolism - other enzymes
NME6	Drug metabolism - other enzymes
NME7	Drug metabolism - other enzymes
CDA	Drug metabolism - other enzymes
CMPK1	Drug metabolism - other enzymes
DUT	Drug metabolism - other enzymes
TK1	Drug metabolism - other enzymes
TK2	Drug metabolism - other enzymes
TYMP	Drug metabolism - other enzymes
UCK1	Drug metabolism - other enzymes
UCK2	Drug metabolism - other enzymes
UCKL1	Drug metabolism - other enzymes
UMPS	Drug metabolism - other enzymes
UPP1	Drug metabolism - other enzymes
UPP2	Drug metabolism - other enzymes
CES1	Drug metabolism - other enzymes
CES2	Drug metabolism - other enzymes
MPO	Drug metabolism - other enzymes
TPMT	Drug metabolism - other enzymes
DPYD	Drug metabolism - other enzymes
DPYS	Drug metabolism - other enzymes
UPB1	Drug metabolism - other enzymes
NAT1	Drug metabolism - other enzymes
NAT2	Drug metabolism - other enzymes
XDH	Drug metabolism - other enzymes
GSTA1	Drug metabolism - other enzymes
GSTA2	Drug metabolism - other enzymes
GSTA3	Drug metabolism - other enzymes
GSTA4	Drug metabolism - other enzymes
GSTA5	Drug metabolism - other enzymes
GSTM1	Drug metabolism - other enzymes
GSTM2	Drug metabolism - other enzymes
GSTM3	Drug metabolism - other enzymes
GSTM4	Drug metabolism - other enzymes
GSTM5	Drug metabolism - other enzymes
GSTO1	Drug metabolism - other enzymes
GSTO2	Drug metabolism - other enzymes
GSTP1	Drug metabolism - other enzymes
GSTT1	Drug metabolism - other enzymes
GSTT2	Drug metabolism - other enzymes
GSTT2B	Drug metabolism - other enzymes
MGST1	Drug metabolism - other enzymes
MGST2	Drug metabolism - other enzymes
MGST3	Drug metabolism - other enzymes
CYP3A4	Drug metabolism - other enzymes
CYP2E1	Drug metabolism - other enzymes
UGT1A1	Drug metabolism - other enzymes
UGT1A10	Drug metabolism - other enzymes
UGT1A3	Drug metabolism - other enzymes
UGT1A4	Drug metabolism - other enzymes
UGT1A5	Drug metabolism - other enzymes
UGT1A6	Drug metabolism - other enzymes
UGT1A7	Drug metabolism - other enzymes
UGT1A8	Drug metabolism - other enzymes
UGT1A9	Drug metabolism - other enzymes
UGT2A1	Drug metabolism - other enzymes
UGT2A2	Drug metabolism - other enzymes
UGT2A3	Drug metabolism - other enzymes
UGT2B10	Drug metabolism - other enzymes
UGT2B11	Drug metabolism - other enzymes
UGT2B15	Drug metabolism - other enzymes
UGT2B17	Drug metabolism - other enzymes
UGT2B28	Drug metabolism - other enzymes
UGT2B4	Drug metabolism - other enzymes
UGT2B7	Drug metabolism - other enzymes
CYP2A6	Drug metabolism - other enzymes
PPAP2A	Ether lipid metabolism
PPAP2B	Ether lipid metabolism
PPAP2C	Ether lipid metabolism
LPCAT1	Ether lipid metabolism
LPCAT2	Ether lipid metabolism
LPCAT4	Ether lipid metabolism
PLD1	Ether lipid metabolism
PLD2	Ether lipid metabolism
PLD3	Ether lipid metabolism
PLD4	Ether lipid metabolism
CEPT1	Ether lipid metabolism
CHPT1	Ether lipid metabolism
EPT1	Ether lipid metabolism
GAL3ST1	Ether lipid metabolism
UGT8	Ether lipid metabolism
AGPS	Ether lipid metabolism
ENPP2	Ether lipid metabolism
ENPP6	Ether lipid metabolism
GDPD1	Ether lipid metabolism
GDPD3	Ether lipid metabolism
PAFAH1B1	Ether lipid metabolism
PAFAH1B2	Ether lipid metabolism
PAFAH1B3	Ether lipid metabolism
PAFAH2	Ether lipid metabolism
PLA2G7	Ether lipid metabolism
TMEM86B	Ether lipid metabolism
PLA2G10	Ether lipid metabolism
PLA2G12A	Ether lipid metabolism
PLA2G12B	Ether lipid metabolism
PLA2G16	Ether lipid metabolism
PLA2G1B	Ether lipid metabolism
PLA2G2A	Ether lipid metabolism
PLA2G2C	Ether lipid metabolism
PLA2G2D	Ether lipid metabolism
PLA2G2E	Ether lipid metabolism
PLA2G2F	Ether lipid metabolism
PLA2G3	Ether lipid metabolism
PLA2G4A	Ether lipid metabolism
PLA2G4B	Ether lipid metabolism
PLA2G4C	Ether lipid metabolism
PLA2G4D	Ether lipid metabolism
PLA2G4E	Ether lipid metabolism
PLA2G4F	Ether lipid metabolism
PLA2G5	Ether lipid metabolism
PLA2G6	Ether lipid metabolism
PLB1	Ether lipid metabolism
ACSBG1	Fatty acid biosynthesis
ACSBG2	Fatty acid biosynthesis
ACSL1	Fatty acid biosynthesis
ACSL3	Fatty acid biosynthesis
ACSL4	Fatty acid biosynthesis
ACSL5	Fatty acid biosynthesis
ACSL6	Fatty acid biosynthesis
ACACA	Fatty acid biosynthesis
ACACB	Fatty acid biosynthesis
FASN	Fatty acid biosynthesis
MCAT	Fatty acid biosynthesis
OLAH	Fatty acid biosynthesis
OXSM	Fatty acid biosynthesis
ACAA2	Fatty acid degradation
HADHB	Fatty acid degradation
GCDH	Fatty acid degradation
ACADSB	Fatty acid degradation
ACADL	Fatty acid degradation
ACADVL	Fatty acid degradation
CPT1A	Fatty acid degradation
CPT1B	Fatty acid degradation
CPT1C	Fatty acid degradation
CPT2	Fatty acid degradation
DCI	Fatty acid degradation
PECI	Fatty acid degradation
CYP4A11	Fatty acid degradation
CYP4A22	Fatty acid degradation
ACADM	Fatty acid degradation
HADH	Fatty acid degradation
ACAT1	Fatty acid degradation
ACADS	Fatty acid degradation
ADH1A	Fatty acid degradation
ADH1B	Fatty acid degradation
ADH1C	Fatty acid degradation
ADH4	Fatty acid degradation
ADH5	Fatty acid degradation
ADH6	Fatty acid degradation
ADH7	Fatty acid degradation
ACSBG1	Fatty acid degradation
ACSBG2	Fatty acid degradation
ACSL1	Fatty acid degradation
ACSL3	Fatty acid degradation
ACSL4	Fatty acid degradation
ACSL5	Fatty acid degradation
ACSL6	Fatty acid degradation
ACOX1	Fatty acid degradation
ACOX3	Fatty acid degradation
ACAA1	Fatty acid degradation
ECHS1	Fatty acid degradation
EHHADH	Fatty acid degradation
ACAT2	Fatty acid degradation
ALDH7A1	Fatty acid degradation
ALDH1B1	Fatty acid degradation
ALDH2	Fatty acid degradation
ALDH3A2	Fatty acid degradation
ALDH9A1	Fatty acid degradation
HADHA	Fatty acid degradation
ELOVL1	Fatty acid elongation
ELOVL3	Fatty acid elongation
ELOVL4	Fatty acid elongation
ELOVL7	Fatty acid elongation
FAM108A1	Fatty acid elongation
FAM108B1	Fatty acid elongation
FAM108C1	Fatty acid elongation
MECR	Fatty acid elongation
PPT1	Fatty acid elongation
PPT2	Fatty acid elongation
THEM4	Fatty acid elongation
THEM5	Fatty acid elongation
ACOT1	Fatty acid elongation
ACOT2	Fatty acid elongation
ACOT4	Fatty acid elongation
ACOT7	Fatty acid elongation
ELOVL2	Fatty acid elongation
ELOVL5	Fatty acid elongation
ELOVL6	Fatty acid elongation
PTPLA	Fatty acid elongation
PTPLAD1	Fatty acid elongation
PTPLAD2	Fatty acid elongation
PTPLB	Fatty acid elongation
TECR	Fatty acid elongation
HSD17B12	Fatty acid elongation
ACAA2	Fatty acid elongation
HADHB	Fatty acid elongation
HADH	Fatty acid elongation
ECHS1	Fatty acid elongation
HADHA	Fatty acid elongation
AKR1B1	Folate biosynthesis
AKR1B10	Folate biosynthesis
DHFR	Folate biosynthesis
DHFRL1	Folate biosynthesis
PAH	Folate biosynthesis
ALPI	Folate biosynthesis
ALPL	Folate biosynthesis
ALPP	Folate biosynthesis
ALPPL2	Folate biosynthesis
TPH1	Folate biosynthesis
TPH2	Folate biosynthesis
TH	Folate biosynthesis
FPGS	Folate biosynthesis
GCH1	Folate biosynthesis
GGH	Folate biosynthesis
GPHN	Folate biosynthesis
MOCOS	Folate biosynthesis
MOCS1	Folate biosynthesis
MOCS2	Folate biosynthesis
PCBD1	Folate biosynthesis
PCBD2	Folate biosynthesis
PTS	Folate biosynthesis
QDPR	Folate biosynthesis
SPR	Folate biosynthesis
CBR1	Folate biosynthesis
AKR1C3	Folate biosynthesis
PFKL	Fructose and mannose metabolism
PFKM	Fructose and mannose metabolism
PFKP	Fructose and mannose metabolism
PFKFB1	Fructose and mannose metabolism
TPI1	Fructose and mannose metabolism
ALDOA	Fructose and mannose metabolism
ALDOB	Fructose and mannose metabolism
ALDOC	Fructose and mannose metabolism
FBP1	Fructose and mannose metabolism
FBP2	Fructose and mannose metabolism
DAK	Fructose and mannose metabolism
PFKFB2	Fructose and mannose metabolism
PFKFB3	Fructose and mannose metabolism
PFKFB4	Fructose and mannose metabolism
SORD	Fructose and mannose metabolism
C12orf5	Fructose and mannose metabolism
ENOSF1	Fructose and mannose metabolism
KHK	Fructose and mannose metabolism
FPGT	Fructose and mannose metabolism
FUK	Fructose and mannose metabolism
GMDS	Fructose and mannose metabolism
GMPPA	Fructose and mannose metabolism
GMPPB	Fructose and mannose metabolism
MPI	Fructose and mannose metabolism
PMM1	Fructose and mannose metabolism
PMM2	Fructose and mannose metabolism
TSTA3	Fructose and mannose metabolism
HK1	Fructose and mannose metabolism
HK2	Fructose and mannose metabolism
HK3	Fructose and mannose metabolism
HKDC1	Fructose and mannose metabolism
AKR1B1	Fructose and mannose metabolism
AKR1B10	Fructose and mannose metabolism
GALM	Galactose metabolism
G6PC	Galactose metabolism
G6PC2	Galactose metabolism
G6PC3	Galactose metabolism
GLA	Galactose metabolism
B4GALT1	Galactose metabolism
B4GALT2	Galactose metabolism
GLB1	Galactose metabolism
GAA	Galactose metabolism
GANC	Galactose metabolism
MGAM	Galactose metabolism
MGAM2	Galactose metabolism
SI	Galactose metabolism
LALBA	Galactose metabolism
LCT	Galactose metabolism
GALE	Galactose metabolism
GALK1	Galactose metabolism
GALT	Galactose metabolism
PGM1	Galactose metabolism
PGM2	Galactose metabolism
GCK	Galactose metabolism
UGP2	Galactose metabolism
PFKL	Galactose metabolism
PFKM	Galactose metabolism
PFKP	Galactose metabolism
HK1	Galactose metabolism
HK2	Galactose metabolism
HK3	Galactose metabolism
HKDC1	Galactose metabolism
AKR1B1	Galactose metabolism
AKR1B10	Galactose metabolism
AKR1A1	Gluconeogenesis
BPGM	Gluconeogenesis
PGAM1	Gluconeogenesis
PGAM2	Gluconeogenesis
PGAM4	Gluconeogenesis
DLD	Gluconeogenesis
ADPGK	Gluconeogenesis
ENO1	Gluconeogenesis
ENO2	Gluconeogenesis
ENO3	Gluconeogenesis
GAPDH	Gluconeogenesis
GAPDHS	Gluconeogenesis
PGK1	Gluconeogenesis
PGK2	Gluconeogenesis
SLC2A2	Gluconeogenesis
ACSS1	Gluconeogenesis
ACSS2	Gluconeogenesis
PANK1	Gluconeogenesis
PKLR	Gluconeogenesis
DLAT	Gluconeogenesis
PCK1	Gluconeogenesis
PCK2	Gluconeogenesis
PDHA1	Gluconeogenesis
PDHA2	Gluconeogenesis
PDHB	Gluconeogenesis
PC	Gluconeogenesis
BRP44L	Gluconeogenesis
SLC25A11	Gluconeogenesis
SLC37A4	Gluconeogenesis
GPI	Gluconeogenesis
LDHA	Gluconeogenesis
LDHAL6A	Gluconeogenesis
LDHAL6B	Gluconeogenesis
LDHB	Gluconeogenesis
LDHC	Gluconeogenesis
MDH2	Gluconeogenesis
PFKFB1	Gluconeogenesis
TPI1	Gluconeogenesis
ALDOA	Gluconeogenesis
ALDOB	Gluconeogenesis
ALDOC	Gluconeogenesis
FBP1	Gluconeogenesis
FBP2	Gluconeogenesis
GALM	Gluconeogenesis
G6PC	Gluconeogenesis
G6PC2	Gluconeogenesis
G6PC3	Gluconeogenesis
ALDH1A3	Gluconeogenesis
ALDH3A1	Gluconeogenesis
ALDH3B1	Gluconeogenesis
ALDH3B2	Gluconeogenesis
ADH1A	Gluconeogenesis
ADH1B	Gluconeogenesis
ADH1C	Gluconeogenesis
ADH4	Gluconeogenesis
ADH5	Gluconeogenesis
ADH6	Gluconeogenesis
ADH7	Gluconeogenesis
PGM1	Gluconeogenesis
PGM2	Gluconeogenesis
GCK	Gluconeogenesis
PFKL	Gluconeogenesis
PFKM	Gluconeogenesis
PFKP	Gluconeogenesis
HK1	Gluconeogenesis
HK2	Gluconeogenesis
HK3	Gluconeogenesis
HKDC1	Gluconeogenesis
GOT1	Gluconeogenesis
GOT2	Gluconeogenesis
ALDH7A1	Gluconeogenesis
ALDH1B1	Gluconeogenesis
ALDH2	Gluconeogenesis
ALDH3A2	Gluconeogenesis
ALDH9A1	Gluconeogenesis
G6PD	Glutathione metabolism
PGD	Glutathione metabolism
GGT6	Glutathione metabolism
GGT7	Glutathione metabolism
IDH1	Glutathione metabolism
IDH2	Glutathione metabolism
ANPEP	Glutathione metabolism
CHAC1	Glutathione metabolism
CHAC2	Glutathione metabolism
GGCT	Glutathione metabolism
GPX4	Glutathione metabolism
GSR	Glutathione metabolism
NAT8	Glutathione metabolism
NAT8B	Glutathione metabolism
OPLAH	Glutathione metabolism
TXNDC12	Glutathione metabolism
GPX1	Glutathione metabolism
GPX2	Glutathione metabolism
GPX3	Glutathione metabolism
GPX5	Glutathione metabolism
GPX6	Glutathione metabolism
GPX7	Glutathione metabolism
GPX8	Glutathione metabolism
GGT1	Glutathione metabolism
GGT5	Glutathione metabolism
LAP3	Glutathione metabolism
ODC1	Glutathione metabolism
GCLC	Glutathione metabolism
GCLM	Glutathione metabolism
GSS	Glutathione metabolism
GSTK1	Glutathione metabolism
RRM1	Glutathione metabolism
RRM2	Glutathione metabolism
RRM2B	Glutathione metabolism
HPGDS	Glutathione metabolism
GSTA1	Glutathione metabolism
GSTA2	Glutathione metabolism
GSTA3	Glutathione metabolism
GSTA4	Glutathione metabolism
GSTA5	Glutathione metabolism
GSTM1	Glutathione metabolism
GSTM2	Glutathione metabolism
GSTM3	Glutathione metabolism
GSTM4	Glutathione metabolism
GSTM5	Glutathione metabolism
GSTO1	Glutathione metabolism
GSTO2	Glutathione metabolism
GSTP1	Glutathione metabolism
GSTT1	Glutathione metabolism
GSTT2	Glutathione metabolism
GSTT2B	Glutathione metabolism
MGST1	Glutathione metabolism
MGST2	Glutathione metabolism
MGST3	Glutathione metabolism
SMS	Glutathione metabolism
SRM	Glutathione metabolism
AGK	Glycerolipid metabolism
DGAT2	Glycerolipid metabolism
GK	Glycerolipid metabolism
GK2	Glycerolipid metabolism
LIPC	Glycerolipid metabolism
LIPF	Glycerolipid metabolism
LIPG	Glycerolipid metabolism
LPL	Glycerolipid metabolism
MGLL	Glycerolipid metabolism
MOGAT1	Glycerolipid metabolism
MOGAT2	Glycerolipid metabolism
MOGAT3	Glycerolipid metabolism
PNLIP	Glycerolipid metabolism
PNLIPRP1	Glycerolipid metabolism
PNLIPRP2	Glycerolipid metabolism
PNLIPRP3	Glycerolipid metabolism
PNPLA2	Glycerolipid metabolism
PNPLA3	Glycerolipid metabolism
AGPAT1	Glycerolipid metabolism
AGPAT2	Glycerolipid metabolism
AGPAT3	Glycerolipid metabolism
AGPAT4	Glycerolipid metabolism
AGPAT5	Glycerolipid metabolism
AGPAT6	Glycerolipid metabolism
AGPAT9	Glycerolipid metabolism
DGKA	Glycerolipid metabolism
DGKB	Glycerolipid metabolism
DGKD	Glycerolipid metabolism
DGKE	Glycerolipid metabolism
DGKG	Glycerolipid metabolism
DGKH	Glycerolipid metabolism
DGKI	Glycerolipid metabolism
DGKK	Glycerolipid metabolism
DGKQ	Glycerolipid metabolism
DGKZ	Glycerolipid metabolism
GPAM	Glycerolipid metabolism
GPAT2	Glycerolipid metabolism
LCLAT1	Glycerolipid metabolism
LPIN1	Glycerolipid metabolism
LPIN2	Glycerolipid metabolism
LPIN3	Glycerolipid metabolism
MBOAT1	Glycerolipid metabolism
MBOAT2	Glycerolipid metabolism
PPAPDC1A	Glycerolipid metabolism
PPAPDC1B	Glycerolipid metabolism
GLYCTK	Glycerolipid metabolism
DGAT1	Glycerolipid metabolism
CEL	Glycerolipid metabolism
PPAP2A	Glycerolipid metabolism
PPAP2B	Glycerolipid metabolism
PPAP2C	Glycerolipid metabolism
DAK	Glycerolipid metabolism
GLA	Glycerolipid metabolism
AKR1A1	Glycerolipid metabolism
AGK	Glycerolipid metabolism
DGAT2	Glycerolipid metabolism
GK	Glycerolipid metabolism
GK2	Glycerolipid metabolism
LIPC	Glycerolipid metabolism
LIPF	Glycerolipid metabolism
LIPG	Glycerolipid metabolism
LPL	Glycerolipid metabolism
MGLL	Glycerolipid metabolism
MOGAT1	Glycerolipid metabolism
MOGAT2	Glycerolipid metabolism
MOGAT3	Glycerolipid metabolism
PNLIP	Glycerolipid metabolism
PNLIPRP1	Glycerolipid metabolism
PNLIPRP2	Glycerolipid metabolism
PNLIPRP3	Glycerolipid metabolism
PNPLA2	Glycerolipid metabolism
PNPLA3	Glycerolipid metabolism
AGPAT1	Glycerolipid metabolism
AGPAT2	Glycerolipid metabolism
AGPAT3	Glycerolipid metabolism
AGPAT4	Glycerolipid metabolism
AGPAT5	Glycerolipid metabolism
AGPAT6	Glycerolipid metabolism
AGPAT9	Glycerolipid metabolism
DGKA	Glycerolipid metabolism
DGKB	Glycerolipid metabolism
DGKD	Glycerolipid metabolism
DGKE	Glycerolipid metabolism
DGKG	Glycerolipid metabolism
DGKH	Glycerolipid metabolism
DGKI	Glycerolipid metabolism
DGKK	Glycerolipid metabolism
DGKQ	Glycerolipid metabolism
DGKZ	Glycerolipid metabolism
GPAM	Glycerolipid metabolism
GPAT2	Glycerolipid metabolism
LCLAT1	Glycerolipid metabolism
LPIN1	Glycerolipid metabolism
LPIN2	Glycerolipid metabolism
LPIN3	Glycerolipid metabolism
MBOAT1	Glycerolipid metabolism
MBOAT2	Glycerolipid metabolism
PPAPDC1A	Glycerolipid metabolism
PPAPDC1B	Glycerolipid metabolism
GLYCTK	Glycerolipid metabolism
DGAT1	Glycerolipid metabolism
CEL	Glycerolipid metabolism
PPAP2A	Glycerolipid metabolism
PPAP2B	Glycerolipid metabolism
PPAP2C	Glycerolipid metabolism
DAK	Glycerolipid metabolism
GLA	Glycerolipid metabolism
AKR1A1	Glycerolipid metabolism
AKR1B1	Glycerolipid metabolism
AKR1B10	Glycerolipid metabolism
AKR1B1	Glycerolipid metabolism
AKR1B10	Glycerolipid metabolism
ALDH7A1	Glycerolipid metabolism
ALDH1B1	Glycerolipid metabolism
ALDH2	Glycerolipid metabolism
ALDH3A2	Glycerolipid metabolism
ALDH9A1	Glycerolipid metabolism
ALDH7A1	Glycerolipid metabolism
ALDH1B1	Glycerolipid metabolism
ALDH2	Glycerolipid metabolism
ALDH3A2	Glycerolipid metabolism
ALDH9A1	Glycerolipid metabolism
CDIPT	Glycerophospholipid metabolism
PCYT1A	Glycerophospholipid metabolism
PCYT1B	Glycerophospholipid metabolism
PCYT2	Glycerophospholipid metabolism
C17orf48	Glycerophospholipid metabolism
ACHE	Glycerophospholipid metabolism
AGXT2L1	Glycerophospholipid metabolism
CDS1	Glycerophospholipid metabolism
CDS2	Glycerophospholipid metabolism
CHAT	Glycerophospholipid metabolism
CHKA	Glycerophospholipid metabolism
CHKB	Glycerophospholipid metabolism
CRLS1	Glycerophospholipid metabolism
ETNK1	Glycerophospholipid metabolism
ETNK2	Glycerophospholipid metabolism
GNPAT	Glycerophospholipid metabolism
GPCPD1	Glycerophospholipid metabolism
GPD1	Glycerophospholipid metabolism
GPD1L	Glycerophospholipid metabolism
GPD2	Glycerophospholipid metabolism
LCAT	Glycerophospholipid metabolism
LPCAT3	Glycerophospholipid metabolism
LPGAT1	Glycerophospholipid metabolism
LYPLA1	Glycerophospholipid metabolism
LYPLA2	Glycerophospholipid metabolism
MBOAT7	Glycerophospholipid metabolism
PEMT	Glycerophospholipid metabolism
PGS1	Glycerophospholipid metabolism
PHOSPHO1	Glycerophospholipid metabolism
PISD	Glycerophospholipid metabolism
PLA2G15	Glycerophospholipid metabolism
PNPLA6	Glycerophospholipid metabolism
PNPLA7	Glycerophospholipid metabolism
PTDSS1	Glycerophospholipid metabolism
PTDSS2	Glycerophospholipid metabolism
TAZ	Glycerophospholipid metabolism
LPCAT1	Glycerophospholipid metabolism
LPCAT2	Glycerophospholipid metabolism
LPCAT4	Glycerophospholipid metabolism
PLD1	Glycerophospholipid metabolism
PLD2	Glycerophospholipid metabolism
PLD3	Glycerophospholipid metabolism
PLD4	Glycerophospholipid metabolism
CEPT1	Glycerophospholipid metabolism
CHPT1	Glycerophospholipid metabolism
EPT1	Glycerophospholipid metabolism
AGPAT1	Glycerophospholipid metabolism
AGPAT2	Glycerophospholipid metabolism
AGPAT3	Glycerophospholipid metabolism
AGPAT4	Glycerophospholipid metabolism
AGPAT5	Glycerophospholipid metabolism
AGPAT6	Glycerophospholipid metabolism
AGPAT9	Glycerophospholipid metabolism
DGKA	Glycerophospholipid metabolism
DGKB	Glycerophospholipid metabolism
DGKD	Glycerophospholipid metabolism
DGKE	Glycerophospholipid metabolism
DGKG	Glycerophospholipid metabolism
DGKH	Glycerophospholipid metabolism
DGKI	Glycerophospholipid metabolism
DGKK	Glycerophospholipid metabolism
DGKQ	Glycerophospholipid metabolism
DGKZ	Glycerophospholipid metabolism
GPAM	Glycerophospholipid metabolism
GPAT2	Glycerophospholipid metabolism
LCLAT1	Glycerophospholipid metabolism
LPIN1	Glycerophospholipid metabolism
LPIN2	Glycerophospholipid metabolism
LPIN3	Glycerophospholipid metabolism
MBOAT1	Glycerophospholipid metabolism
MBOAT2	Glycerophospholipid metabolism
PPAPDC1A	Glycerophospholipid metabolism
PPAPDC1B	Glycerophospholipid metabolism
PLA2G10	Glycerophospholipid metabolism
PLA2G12A	Glycerophospholipid metabolism
PLA2G12B	Glycerophospholipid metabolism
PLA2G16	Glycerophospholipid metabolism
PLA2G1B	Glycerophospholipid metabolism
PLA2G2A	Glycerophospholipid metabolism
PLA2G2C	Glycerophospholipid metabolism
PLA2G2D	Glycerophospholipid metabolism
PLA2G2E	Glycerophospholipid metabolism
PLA2G2F	Glycerophospholipid metabolism
PLA2G3	Glycerophospholipid metabolism
PLA2G4A	Glycerophospholipid metabolism
PLA2G4B	Glycerophospholipid metabolism
PLA2G4C	Glycerophospholipid metabolism
PLA2G4D	Glycerophospholipid metabolism
PLA2G4E	Glycerophospholipid metabolism
PLA2G4F	Glycerophospholipid metabolism
PLA2G5	Glycerophospholipid metabolism
PLA2G6	Glycerophospholipid metabolism
PLB1	Glycerophospholipid metabolism
PPAP2A	Glycerophospholipid metabolism
PPAP2B	Glycerophospholipid metabolism
PPAP2C	Glycerophospholipid metabolism
GCSH	Glycine, serine and threonine metabolism
GLDC	Glycine, serine and threonine metabolism
AMT	Glycine, serine and threonine metabolism
SHMT1	Glycine, serine and threonine metabolism
SHMT2	Glycine, serine and threonine metabolism
GRHPR	Glycine, serine and threonine metabolism
PIPOX	Glycine, serine and threonine metabolism
ALAS1	Glycine, serine and threonine metabolism
ALAS2	Glycine, serine and threonine metabolism
PSAT1	Glycine, serine and threonine metabolism
CHDH	Glycine, serine and threonine metabolism
DMGDH	Glycine, serine and threonine metabolism
GCAT	Glycine, serine and threonine metabolism
GNMT	Glycine, serine and threonine metabolism
PHGDH	Glycine, serine and threonine metabolism
PSPH	Glycine, serine and threonine metabolism
SARDH	Glycine, serine and threonine metabolism
SRR	Glycine, serine and threonine metabolism
AGXT	Glycine, serine and threonine metabolism
GAMT	Glycine, serine and threonine metabolism
GATM	Glycine, serine and threonine metabolism
AOC2	Glycine, serine and threonine metabolism
AOC3	Glycine, serine and threonine metabolism
BHMT	Glycine, serine and threonine metabolism
CTH	Glycine, serine and threonine metabolism
SDS	Glycine, serine and threonine metabolism
SDSL	Glycine, serine and threonine metabolism
BPGM	Glycine, serine and threonine metabolism
PGAM1	Glycine, serine and threonine metabolism
PGAM2	Glycine, serine and threonine metabolism
PGAM4	Glycine, serine and threonine metabolism
DLD	Glycine, serine and threonine metabolism
AGXT2	Glycine, serine and threonine metabolism
CBS	Glycine, serine and threonine metabolism
DAO	Glycine, serine and threonine metabolism
MAOA	Glycine, serine and threonine metabolism
MAOB	Glycine, serine and threonine metabolism
GLYCTK	Glycine, serine and threonine metabolism
CBS	Glycine, serine and threonine metabolism
ALDH7A1	Glycine, serine and threonine metabolism
PKM2	Glycolysis
PFKFB2	Glycolysis
PFKFB3	Glycolysis
PFKFB4	Glycolysis
ADPGK	Glycolysis
ENO1	Glycolysis
ENO2	Glycolysis
ENO3	Glycolysis
GAPDH	Glycolysis
GAPDHS	Glycolysis
PGK1	Glycolysis
PGK2	Glycolysis
SLC2A2	Glycolysis
ACSS1	Glycolysis
ACSS2	Glycolysis
PANK1	Glycolysis
PKLR	Glycolysis
DLAT	Glycolysis
PCK1	Glycolysis
PCK2	Glycolysis
PDHA1	Glycolysis
PDHA2	Glycolysis
PDHB	Glycolysis
GPI	Glycolysis
LDHA	Glycolysis
LDHAL6A	Glycolysis
LDHAL6B	Glycolysis
LDHB	Glycolysis
LDHC	Glycolysis
PFKFB1	Glycolysis
TPI1	Glycolysis
ALDOA	Glycolysis
ALDOB	Glycolysis
ALDOC	Glycolysis
FBP1	Glycolysis
FBP2	Glycolysis
GALM	Glycolysis
G6PC	Glycolysis
G6PC2	Glycolysis
BPGM	Glycolysis
PGAM1	Glycolysis
PGAM2	Glycolysis
PGAM4	Glycolysis
DLD	Glycolysis
ALDH1A3	Glycolysis
ALDH3A1	Glycolysis
ALDH3B1	Glycolysis
ALDH3B2	Glycolysis
ADH1A	Glycolysis
ADH1B	Glycolysis
ADH1C	Glycolysis
ADH4	Glycolysis
ADH5	Glycolysis
ADH6	Glycolysis
ADH7	Glycolysis
PGM1	Glycolysis
PGM2	Glycolysis
GCK	Glycolysis
PFKL	Glycolysis
PFKM	Glycolysis
PFKP	Glycolysis
AKR1A1	Glycolysis
HK1	Glycolysis
HK2	Glycolysis
HK3	Glycolysis
HKDC1	Glycolysis
ALDH1B1	Glycolysis
ALDH2	Glycolysis
ALDH3A2	Glycolysis
ALDH9A1	Glycolysis
ALDH7A1	Glycolysis
B3GALT6	Glycosaminoglycan biosynthesis - chondroitin sulfate / dermatan sulfate
B3GAT3	Glycosaminoglycan biosynthesis - chondroitin sulfate / dermatan sulfate
B4GALT7	Glycosaminoglycan biosynthesis - chondroitin sulfate / dermatan sulfate
XYLT1	Glycosaminoglycan biosynthesis - chondroitin sulfate / dermatan sulfate
XYLT2	Glycosaminoglycan biosynthesis - chondroitin sulfate / dermatan sulfate
CHPF	Glycosaminoglycan biosynthesis - chondroitin sulfate / dermatan sulfate
CHPF2	Glycosaminoglycan biosynthesis - chondroitin sulfate / dermatan sulfate
CHST11	Glycosaminoglycan biosynthesis - chondroitin sulfate / dermatan sulfate
CHST12	Glycosaminoglycan biosynthesis - chondroitin sulfate / dermatan sulfate
CHST13	Glycosaminoglycan biosynthesis - chondroitin sulfate / dermatan sulfate
CHST14	Glycosaminoglycan biosynthesis - chondroitin sulfate / dermatan sulfate
CHST15	Glycosaminoglycan biosynthesis - chondroitin sulfate / dermatan sulfate
CHST3	Glycosaminoglycan biosynthesis - chondroitin sulfate / dermatan sulfate
CHST7	Glycosaminoglycan biosynthesis - chondroitin sulfate / dermatan sulfate
CHSY1	Glycosaminoglycan biosynthesis - chondroitin sulfate / dermatan sulfate
CHSY3	Glycosaminoglycan biosynthesis - chondroitin sulfate / dermatan sulfate
CSGALNACT1	Glycosaminoglycan biosynthesis - chondroitin sulfate / dermatan sulfate
CSGALNACT2	Glycosaminoglycan biosynthesis - chondroitin sulfate / dermatan sulfate
DSE	Glycosaminoglycan biosynthesis - chondroitin sulfate / dermatan sulfate
UST	Glycosaminoglycan biosynthesis - chondroitin sulfate / dermatan sulfate
EXT1	Glycosaminoglycan biosynthesis - heparan sulfate / heparin
EXT2	Glycosaminoglycan biosynthesis - heparan sulfate / heparin
EXTL1	Glycosaminoglycan biosynthesis - heparan sulfate / heparin
EXTL2	Glycosaminoglycan biosynthesis - heparan sulfate / heparin
EXTL3	Glycosaminoglycan biosynthesis - heparan sulfate / heparin
GLCE	Glycosaminoglycan biosynthesis - heparan sulfate / heparin
HS2ST1	Glycosaminoglycan biosynthesis - heparan sulfate / heparin
HS3ST1	Glycosaminoglycan biosynthesis - heparan sulfate / heparin
HS3ST2	Glycosaminoglycan biosynthesis - heparan sulfate / heparin
HS3ST3A1	Glycosaminoglycan biosynthesis - heparan sulfate / heparin
HS3ST3B1	Glycosaminoglycan biosynthesis - heparan sulfate / heparin
HS3ST5	Glycosaminoglycan biosynthesis - heparan sulfate / heparin
HS6ST1	Glycosaminoglycan biosynthesis - heparan sulfate / heparin
HS6ST2	Glycosaminoglycan biosynthesis - heparan sulfate / heparin
HS6ST3	Glycosaminoglycan biosynthesis - heparan sulfate / heparin
NDST1	Glycosaminoglycan biosynthesis - heparan sulfate / heparin
NDST2	Glycosaminoglycan biosynthesis - heparan sulfate / heparin
NDST3	Glycosaminoglycan biosynthesis - heparan sulfate / heparin
NDST4	Glycosaminoglycan biosynthesis - heparan sulfate / heparin
B3GALT6	Glycosaminoglycan biosynthesis - heparan sulfate / heparin
B3GAT3	Glycosaminoglycan biosynthesis - heparan sulfate / heparin
B4GALT7	Glycosaminoglycan biosynthesis - heparan sulfate / heparin
XYLT1	Glycosaminoglycan biosynthesis - heparan sulfate / heparin
XYLT2	Glycosaminoglycan biosynthesis - heparan sulfate / heparin
ST3GAL1	Glycosaminoglycan biosynthesis - keratan sulfate
ST3GAL2	Glycosaminoglycan biosynthesis - keratan sulfate
B3GNT1	Glycosaminoglycan biosynthesis - keratan sulfate
B4GALT4	Glycosaminoglycan biosynthesis - keratan sulfate
B4GALT3	Glycosaminoglycan biosynthesis - keratan sulfate
ST3GAL3	Glycosaminoglycan biosynthesis - keratan sulfate
FUT8	Glycosaminoglycan biosynthesis - keratan sulfate
B3GNT7	Glycosaminoglycan biosynthesis - keratan sulfate
CHST1	Glycosaminoglycan biosynthesis - keratan sulfate
CHST2	Glycosaminoglycan biosynthesis - keratan sulfate
CHST4	Glycosaminoglycan biosynthesis - keratan sulfate
CHST6	Glycosaminoglycan biosynthesis - keratan sulfate
B4GALT1	Glycosaminoglycan biosynthesis - keratan sulfate
B4GALT2	Glycosaminoglycan biosynthesis - keratan sulfate
ARSB	Glycosaminoglycan degradation
GALNS	Glycosaminoglycan degradation
GNS	Glycosaminoglycan degradation
HGSNAT	Glycosaminoglycan degradation
HPSE	Glycosaminoglycan degradation
HPSE2	Glycosaminoglycan degradation
HYAL1	Glycosaminoglycan degradation
HYAL2	Glycosaminoglycan degradation
HYAL3	Glycosaminoglycan degradation
HYAL4	Glycosaminoglycan degradation
IDS	Glycosaminoglycan degradation
IDUA	Glycosaminoglycan degradation
NAGLU	Glycosaminoglycan degradation
SGSH	Glycosaminoglycan degradation
SPAM1	Glycosaminoglycan degradation
HEXA	Glycosaminoglycan degradation
HEXB	Glycosaminoglycan degradation
GUSB	Glycosaminoglycan degradation
GLB1	Glycosaminoglycan degradation
ST8SIA1	Glycosphingolipid biosynthesis - ganglio series
B3GALT4	Glycosphingolipid biosynthesis - ganglio series
B4GALNT1	Glycosphingolipid biosynthesis - ganglio series
SLC33A1	Glycosphingolipid biosynthesis - ganglio series
ST3GAL5	Glycosphingolipid biosynthesis - ganglio series
ST6GALNAC3	Glycosphingolipid biosynthesis - ganglio series
ST6GALNAC4	Glycosphingolipid biosynthesis - ganglio series
ST6GALNAC5	Glycosphingolipid biosynthesis - ganglio series
ST6GALNAC6	Glycosphingolipid biosynthesis - ganglio series
ST8SIA5	Glycosphingolipid biosynthesis - ganglio series
ST3GAL1	Glycosphingolipid biosynthesis - ganglio series
ST3GAL2	Glycosphingolipid biosynthesis - ganglio series
HEXA	Glycosphingolipid biosynthesis - ganglio series
HEXB	Glycosphingolipid biosynthesis - ganglio series
GLB1	Glycosphingolipid biosynthesis - ganglio series
A4GALT	Glycosphingolipid biosynthesis - globo and isoglobo series
B3GALNT1	Glycosphingolipid biosynthesis - globo and isoglobo series
B3GALT5	Glycosphingolipid biosynthesis - globo and isoglobo series
FUT1	Glycosphingolipid biosynthesis - globo and isoglobo series
FUT2	Glycosphingolipid biosynthesis - globo and isoglobo series
FUT9	Glycosphingolipid biosynthesis - globo and isoglobo series
A3GALT2	Glycosphingolipid biosynthesis - globo and isoglobo series
GBGT1	Glycosphingolipid biosynthesis - globo and isoglobo series
NAGA	Glycosphingolipid biosynthesis - globo and isoglobo series
ST8SIA1	Glycosphingolipid biosynthesis - globo and isoglobo series
ST3GAL1	Glycosphingolipid biosynthesis - globo and isoglobo series
ST3GAL2	Glycosphingolipid biosynthesis - globo and isoglobo series
GLA	Glycosphingolipid biosynthesis - globo and isoglobo series
HEXA	Glycosphingolipid biosynthesis - globo and isoglobo series
HEXB	Glycosphingolipid biosynthesis - globo and isoglobo series
FUT4	Glycosphingolipid biosynthesis - lacto and neolacto series
ABO	Glycosphingolipid biosynthesis - lacto and neolacto series
B3GALT1	Glycosphingolipid biosynthesis - lacto and neolacto series
B3GALT2	Glycosphingolipid biosynthesis - lacto and neolacto series
B3GNT3	Glycosphingolipid biosynthesis - lacto and neolacto series
B3GNT4	Glycosphingolipid biosynthesis - lacto and neolacto series
B3GNT5	Glycosphingolipid biosynthesis - lacto and neolacto series
FUT3	Glycosphingolipid biosynthesis - lacto and neolacto series
FUT5	Glycosphingolipid biosynthesis - lacto and neolacto series
FUT6	Glycosphingolipid biosynthesis - lacto and neolacto series
FUT7	Glycosphingolipid biosynthesis - lacto and neolacto series
GCNT2	Glycosphingolipid biosynthesis - lacto and neolacto series
ST3GAL4	Glycosphingolipid biosynthesis - lacto and neolacto series
ST3GAL6	Glycosphingolipid biosynthesis - lacto and neolacto series
B3GNT1	Glycosphingolipid biosynthesis - lacto and neolacto series
B4GALT4	Glycosphingolipid biosynthesis - lacto and neolacto series
B4GALT3	Glycosphingolipid biosynthesis - lacto and neolacto series
ST3GAL3	Glycosphingolipid biosynthesis - lacto and neolacto series
A4GALT	Glycosphingolipid biosynthesis - lacto and neolacto series
B3GALNT1	Glycosphingolipid biosynthesis - lacto and neolacto series
B3GALT5	Glycosphingolipid biosynthesis - lacto and neolacto series
FUT1	Glycosphingolipid biosynthesis - lacto and neolacto series
FUT2	Glycosphingolipid biosynthesis - lacto and neolacto series
FUT9	Glycosphingolipid biosynthesis - lacto and neolacto series
B4GALT1	Glycosphingolipid biosynthesis - lacto and neolacto series
B4GALT2	Glycosphingolipid biosynthesis - lacto and neolacto series
ST8SIA1	Glycosphingolipid biosynthesis - lacto and neolacto series
DPM2	Glycosylphosphatidylinositol (GPI)-anchor biosynthesis
GPAA1	Glycosylphosphatidylinositol (GPI)-anchor biosynthesis
GPLD1	Glycosylphosphatidylinositol (GPI)-anchor biosynthesis
PGAP1	Glycosylphosphatidylinositol (GPI)-anchor biosynthesis
PIGA	Glycosylphosphatidylinositol (GPI)-anchor biosynthesis
PIGB	Glycosylphosphatidylinositol (GPI)-anchor biosynthesis
PIGC	Glycosylphosphatidylinositol (GPI)-anchor biosynthesis
PIGF	Glycosylphosphatidylinositol (GPI)-anchor biosynthesis
PIGG	Glycosylphosphatidylinositol (GPI)-anchor biosynthesis
PIGH	Glycosylphosphatidylinositol (GPI)-anchor biosynthesis
PIGK	Glycosylphosphatidylinositol (GPI)-anchor biosynthesis
PIGL	Glycosylphosphatidylinositol (GPI)-anchor biosynthesis
PIGM	Glycosylphosphatidylinositol (GPI)-anchor biosynthesis
PIGN	Glycosylphosphatidylinositol (GPI)-anchor biosynthesis
PIGO	Glycosylphosphatidylinositol (GPI)-anchor biosynthesis
PIGP	Glycosylphosphatidylinositol (GPI)-anchor biosynthesis
PIGQ	Glycosylphosphatidylinositol (GPI)-anchor biosynthesis
PIGS	Glycosylphosphatidylinositol (GPI)-anchor biosynthesis
PIGT	Glycosylphosphatidylinositol (GPI)-anchor biosynthesis
PIGU	Glycosylphosphatidylinositol (GPI)-anchor biosynthesis
PIGV	Glycosylphosphatidylinositol (GPI)-anchor biosynthesis
PIGW	Glycosylphosphatidylinositol (GPI)-anchor biosynthesis
PIGX	Glycosylphosphatidylinositol (GPI)-anchor biosynthesis
PIGY	Glycosylphosphatidylinositol (GPI)-anchor biosynthesis
PIGZ	Glycosylphosphatidylinositol (GPI)-anchor biosynthesis
MCEE	Glyoxylate and dicarboxylate metabolism
MUT	Glyoxylate and dicarboxylate metabolism
PCCA	Glyoxylate and dicarboxylate metabolism
PCCB	Glyoxylate and dicarboxylate metabolism
ACO1	Glyoxylate and dicarboxylate metabolism
ACO2	Glyoxylate and dicarboxylate metabolism
CS	Glyoxylate and dicarboxylate metabolism
AFMID	Glyoxylate and dicarboxylate metabolism
CAT	Glyoxylate and dicarboxylate metabolism
HAO1	Glyoxylate and dicarboxylate metabolism
HAO2	Glyoxylate and dicarboxylate metabolism
HYI	Glyoxylate and dicarboxylate metabolism
PGP	Glyoxylate and dicarboxylate metabolism
DHDPSL	Glyoxylate and dicarboxylate metabolism
MDH1	Glyoxylate and dicarboxylate metabolism
GCSH	Glyoxylate and dicarboxylate metabolism
GLDC	Glyoxylate and dicarboxylate metabolism
AMT	Glyoxylate and dicarboxylate metabolism
SHMT1	Glyoxylate and dicarboxylate metabolism
SHMT2	Glyoxylate and dicarboxylate metabolism
GRHPR	Glyoxylate and dicarboxylate metabolism
GLUL	Glyoxylate and dicarboxylate metabolism
ACAT1	Glyoxylate and dicarboxylate metabolism
MDH2	Glyoxylate and dicarboxylate metabolism
AGXT	Glyoxylate and dicarboxylate metabolism
ACSS1	Glyoxylate and dicarboxylate metabolism
ACSS2	Glyoxylate and dicarboxylate metabolism
ACAT2	Glyoxylate and dicarboxylate metabolism
GLYCTK	Glyoxylate and dicarboxylate metabolism
DLD	Glyoxylate and dicarboxylate metabolism
FTCD	Histidine metabolism
AMDHD1	Histidine metabolism
C9orf41	Histidine metabolism
HAL	Histidine metabolism
HDC	Histidine metabolism
HNMT	Histidine metabolism
UROC1	Histidine metabolism
ASPA	Histidine metabolism
CARNS1	Histidine metabolism
CNDP1	Histidine metabolism
CNDP2	Histidine metabolism
MAOA	Histidine metabolism
MAOB	Histidine metabolism
ALDH1A3	Histidine metabolism
ALDH3A1	Histidine metabolism
ALDH3B1	Histidine metabolism
ALDH3B2	Histidine metabolism
ALDH1B1	Histidine metabolism
ALDH2	Histidine metabolism
ALDH3A2	Histidine metabolism
ALDH9A1	Histidine metabolism
ALDH7A1	Histidine metabolism
ABP1	Histidine metabolism
IMPAD1	Inositol phosphate metabolism
FIG4	Inositol phosphate metabolism
IMPA1	Inositol phosphate metabolism
IMPA2	Inositol phosphate metabolism
INPP1	Inositol phosphate metabolism
INPP4A	Inositol phosphate metabolism
INPP4B	Inositol phosphate metabolism
INPP5A	Inositol phosphate metabolism
INPP5B	Inositol phosphate metabolism
INPP5D	Inositol phosphate metabolism
INPP5E	Inositol phosphate metabolism
INPP5F	Inositol phosphate metabolism
INPP5J	Inositol phosphate metabolism
INPP5K	Inositol phosphate metabolism
INPPL1	Inositol phosphate metabolism
IPMK	Inositol phosphate metabolism
IPPK	Inositol phosphate metabolism
ISYNA1	Inositol phosphate metabolism
ITPK1	Inositol phosphate metabolism
ITPKA	Inositol phosphate metabolism
ITPKB	Inositol phosphate metabolism
ITPKC	Inositol phosphate metabolism
MINPP1	Inositol phosphate metabolism
MTM1	Inositol phosphate metabolism
MTMR1	Inositol phosphate metabolism
MTMR14	Inositol phosphate metabolism
MTMR2	Inositol phosphate metabolism
MTMR3	Inositol phosphate metabolism
MTMR4	Inositol phosphate metabolism
MTMR6	Inositol phosphate metabolism
MTMR7	Inositol phosphate metabolism
MTMR8	Inositol phosphate metabolism
OCRL	Inositol phosphate metabolism
PI4K2A	Inositol phosphate metabolism
PI4K2B	Inositol phosphate metabolism
PI4KA	Inositol phosphate metabolism
PI4KB	Inositol phosphate metabolism
PIK3C2A	Inositol phosphate metabolism
PIK3C2B	Inositol phosphate metabolism
PIK3C2G	Inositol phosphate metabolism
PIK3C3	Inositol phosphate metabolism
PIK3CA	Inositol phosphate metabolism
PIK3CB	Inositol phosphate metabolism
PIK3CD	Inositol phosphate metabolism
PIK3CG	Inositol phosphate metabolism
PIKFYVE	Inositol phosphate metabolism
PIP4K2C	Inositol phosphate metabolism
PIP5K1A	Inositol phosphate metabolism
PIP5K1B	Inositol phosphate metabolism
PIP5K1C	Inositol phosphate metabolism
PIP5K2A	Inositol phosphate metabolism
PIP5K2B	Inositol phosphate metabolism
PIP5KL1	Inositol phosphate metabolism
PLCB1	Inositol phosphate metabolism
PLCB2	Inositol phosphate metabolism
PLCB3	Inositol phosphate metabolism
PLCB4	Inositol phosphate metabolism
PLCD1	Inositol phosphate metabolism
PLCD3	Inositol phosphate metabolism
PLCD4	Inositol phosphate metabolism
PLCE1	Inositol phosphate metabolism
PLCG1	Inositol phosphate metabolism
PLCG2	Inositol phosphate metabolism
PLCH1	Inositol phosphate metabolism
PLCH2	Inositol phosphate metabolism
PLCZ1	Inositol phosphate metabolism
PTEN	Inositol phosphate metabolism
SACM1L	Inositol phosphate metabolism
SYNJ1	Inositol phosphate metabolism
SYNJ2	Inositol phosphate metabolism
MIOX	Inositol phosphate metabolism
ALDH6A1	Inositol phosphate metabolism
CDIPT	Inositol phosphate metabolism
TPI1	Inositol phosphate metabolism
ALOX15	Linoleic acid metabolism
CYP2J2	Linoleic acid metabolism
CYP2C19	Linoleic acid metabolism
CYP2C9	Linoleic acid metabolism
CYP2C8	Linoleic acid metabolism
CYP1A2	Linoleic acid metabolism
CYP3A4	Linoleic acid metabolism
CYP2E1	Linoleic acid metabolism
PLA2G10	Linoleic acid metabolism
PLA2G12A	Linoleic acid metabolism
PLA2G12B	Linoleic acid metabolism
PLA2G16	Linoleic acid metabolism
PLA2G1B	Linoleic acid metabolism
PLA2G2A	Linoleic acid metabolism
PLA2G2C	Linoleic acid metabolism
PLA2G2D	Linoleic acid metabolism
PLA2G2E	Linoleic acid metabolism
PLA2G2F	Linoleic acid metabolism
PLA2G3	Linoleic acid metabolism
PLA2G4A	Linoleic acid metabolism
PLA2G4B	Linoleic acid metabolism
PLA2G4C	Linoleic acid metabolism
PLA2G4D	Linoleic acid metabolism
PLA2G4E	Linoleic acid metabolism
PLA2G4F	Linoleic acid metabolism
PLA2G5	Linoleic acid metabolism
PLA2G6	Linoleic acid metabolism
PLB1	Linoleic acid metabolism
LIAS	Lipoic acid metabolism
LIPT1	Lipoic acid metabolism
LIPT2	Lipoic acid metabolism
GLT25D1	Lysine degradation
GLT25D2	Lysine degradation
PLOD3	Lysine degradation
DLST	Lysine degradation
OGDH	Lysine degradation
OGDHL	Lysine degradation
AADAT	Lysine degradation
AASS	Lysine degradation
AGPHD1	Lysine degradation
AGXT2L2	Lysine degradation
ASH1L	Lysine degradation
BBOX1	Lysine degradation
C2orf34	Lysine degradation
DOT1L	Lysine degradation
EHMT1	Lysine degradation
EHMT2	Lysine degradation
EZH1	Lysine degradation
EZH2	Lysine degradation
KMT2B	Lysine degradation
MLL	Lysine degradation
MLL2	Lysine degradation
MLL3	Lysine degradation
MLL5	Lysine degradation
NSD1	Lysine degradation
PLOD1	Lysine degradation
PLOD2	Lysine degradation
PRDM2	Lysine degradation
PRDM6	Lysine degradation
PRDM7	Lysine degradation
PRDM9	Lysine degradation
SETD1A	Lysine degradation
SETD1B	Lysine degradation
SETD2	Lysine degradation
SETD3	Lysine degradation
SETD7	Lysine degradation
SETD8	Lysine degradation
SETDB1	Lysine degradation
SETDB2	Lysine degradation
SETMAR	Lysine degradation
SUV39H1	Lysine degradation
SUV39H2	Lysine degradation
SUV420H1	Lysine degradation
SUV420H2	Lysine degradation
TMLHE	Lysine degradation
WHSC1	Lysine degradation
WHSC1L1	Lysine degradation
GCDH	Lysine degradation
PIPOX	Lysine degradation
EHHADH	Lysine degradation
HADH	Lysine degradation
ACAT1	Lysine degradation
ECHS1	Lysine degradation
ACAT2	Lysine degradation
HADHA	Lysine degradation
ALDH1B1	Lysine degradation
ALDH2	Lysine degradation
ALDH3A2	Lysine degradation
ALDH9A1	Lysine degradation
ALDH7A1	Lysine degradation
B3GNT6	Mannose type O-glycan biosynthesis
MGAT5B	Mannose type O-glycan biosynthesis
POMT1	Mannose type O-glycan biosynthesis
POMT2	Mannose type O-glycan biosynthesis
ISPD	Mannose type O-glycan biosynthesis
B3GALNT2	Mannose type O-glycan biosynthesis
B3GAT1	Mannose type O-glycan biosynthesis
B3GAT2	Mannose type O-glycan biosynthesis
C3orf39	Mannose type O-glycan biosynthesis
CHST10	Mannose type O-glycan biosynthesis
FKRP	Mannose type O-glycan biosynthesis
FKTN	Mannose type O-glycan biosynthesis
GYLTL1B	Mannose type O-glycan biosynthesis
LARGE	Mannose type O-glycan biosynthesis
POMGNT1	Mannose type O-glycan biosynthesis
SGK196	Mannose type O-glycan biosynthesis
TMEM5	Mannose type O-glycan biosynthesis
FUT4	Mannose type O-glycan biosynthesis
B4GALT3	Mannose type O-glycan biosynthesis
ST3GAL3	Mannose type O-glycan biosynthesis
FUT9	Mannose type O-glycan biosynthesis
B4GALT1	Mannose type O-glycan biosynthesis
B4GALT2	Mannose type O-glycan biosynthesis
DHDH	Metabolism of xenobiotics by cytochrome P450
CYP2S1	Metabolism of xenobiotics by cytochrome P450
CYP1A1	Metabolism of xenobiotics by cytochrome P450
AKR1C1	Metabolism of xenobiotics by cytochrome P450
HSD11B1	Metabolism of xenobiotics by cytochrome P450
CYP1B1	Metabolism of xenobiotics by cytochrome P450
AKR7A2	Metabolism of xenobiotics by cytochrome P450
AKR7A3	Metabolism of xenobiotics by cytochrome P450
CYP2A13	Metabolism of xenobiotics by cytochrome P450
CYP2F1	Metabolism of xenobiotics by cytochrome P450
EPHX1	Metabolism of xenobiotics by cytochrome P450
SULT2A1	Metabolism of xenobiotics by cytochrome P450
CBR3	Metabolism of xenobiotics by cytochrome P450
CYP2D7	Metabolism of xenobiotics by cytochrome P450
CYP3A5	Metabolism of xenobiotics by cytochrome P450
CYP2B6	Metabolism of xenobiotics by cytochrome P450
CYP2D6	Metabolism of xenobiotics by cytochrome P450
CBR1	Metabolism of xenobiotics by cytochrome P450
GSTK1	Metabolism of xenobiotics by cytochrome P450
UGT1A1	Metabolism of xenobiotics by cytochrome P450
UGT1A10	Metabolism of xenobiotics by cytochrome P450
UGT1A3	Metabolism of xenobiotics by cytochrome P450
UGT1A4	Metabolism of xenobiotics by cytochrome P450
UGT1A5	Metabolism of xenobiotics by cytochrome P450
UGT1A6	Metabolism of xenobiotics by cytochrome P450
UGT1A7	Metabolism of xenobiotics by cytochrome P450
UGT1A8	Metabolism of xenobiotics by cytochrome P450
UGT1A9	Metabolism of xenobiotics by cytochrome P450
UGT2A1	Metabolism of xenobiotics by cytochrome P450
UGT2A2	Metabolism of xenobiotics by cytochrome P450
UGT2A3	Metabolism of xenobiotics by cytochrome P450
UGT2B10	Metabolism of xenobiotics by cytochrome P450
UGT2B11	Metabolism of xenobiotics by cytochrome P450
UGT2B15	Metabolism of xenobiotics by cytochrome P450
UGT2B17	Metabolism of xenobiotics by cytochrome P450
UGT2B28	Metabolism of xenobiotics by cytochrome P450
UGT2B4	Metabolism of xenobiotics by cytochrome P450
UGT2B7	Metabolism of xenobiotics by cytochrome P450
CYP2A6	Metabolism of xenobiotics by cytochrome P450
HPGDS	Metabolism of xenobiotics by cytochrome P450
GSTA1	Metabolism of xenobiotics by cytochrome P450
GSTA2	Metabolism of xenobiotics by cytochrome P450
GSTA3	Metabolism of xenobiotics by cytochrome P450
GSTA4	Metabolism of xenobiotics by cytochrome P450
GSTA5	Metabolism of xenobiotics by cytochrome P450
GSTM1	Metabolism of xenobiotics by cytochrome P450
GSTM2	Metabolism of xenobiotics by cytochrome P450
GSTM3	Metabolism of xenobiotics by cytochrome P450
GSTM4	Metabolism of xenobiotics by cytochrome P450
GSTM5	Metabolism of xenobiotics by cytochrome P450
GSTO1	Metabolism of xenobiotics by cytochrome P450
GSTO2	Metabolism of xenobiotics by cytochrome P450
GSTP1	Metabolism of xenobiotics by cytochrome P450
GSTT1	Metabolism of xenobiotics by cytochrome P450
GSTT2	Metabolism of xenobiotics by cytochrome P450
GSTT2B	Metabolism of xenobiotics by cytochrome P450
MGST1	Metabolism of xenobiotics by cytochrome P450
MGST2	Metabolism of xenobiotics by cytochrome P450
MGST3	Metabolism of xenobiotics by cytochrome P450
CYP2C9	Metabolism of xenobiotics by cytochrome P450
CYP1A2	Metabolism of xenobiotics by cytochrome P450
CYP3A4	Metabolism of xenobiotics by cytochrome P450
CYP2D6	Metabolism of xenobiotics by cytochrome P450
ADH1A	Metabolism of xenobiotics by cytochrome P450
ADH1B	Metabolism of xenobiotics by cytochrome P450
ADH1C	Metabolism of xenobiotics by cytochrome P450
ADH4	Metabolism of xenobiotics by cytochrome P450
ADH5	Metabolism of xenobiotics by cytochrome P450
ADH6	Metabolism of xenobiotics by cytochrome P450
ADH7	Metabolism of xenobiotics by cytochrome P450
CYP2E1	Metabolism of xenobiotics by cytochrome P450
ALDH1A3	Metabolism of xenobiotics by cytochrome P450
ALDH3A1	Metabolism of xenobiotics by cytochrome P450
ALDH3B1	Metabolism of xenobiotics by cytochrome P450
ALDH3B2	Metabolism of xenobiotics by cytochrome P450
B4GALT5	Mucin type O-glycan biosynthesis
C1GALT1	Mucin type O-glycan biosynthesis
C1GALT1C1	Mucin type O-glycan biosynthesis
GALNT1	Mucin type O-glycan biosynthesis
GALNT10	Mucin type O-glycan biosynthesis
GALNT11	Mucin type O-glycan biosynthesis
GALNT12	Mucin type O-glycan biosynthesis
GALNT13	Mucin type O-glycan biosynthesis
GALNT14	Mucin type O-glycan biosynthesis
GALNT2	Mucin type O-glycan biosynthesis
GALNT3	Mucin type O-glycan biosynthesis
GALNT4	Mucin type O-glycan biosynthesis
GALNT5	Mucin type O-glycan biosynthesis
GALNT6	Mucin type O-glycan biosynthesis
GALNT7	Mucin type O-glycan biosynthesis
GALNT8	Mucin type O-glycan biosynthesis
GALNT9	Mucin type O-glycan biosynthesis
GALNTL2	Mucin type O-glycan biosynthesis
GALNTL4	Mucin type O-glycan biosynthesis
GALNTL5	Mucin type O-glycan biosynthesis
GALNTL6	Mucin type O-glycan biosynthesis
GCNT1	Mucin type O-glycan biosynthesis
GCNT3	Mucin type O-glycan biosynthesis
GCNT4	Mucin type O-glycan biosynthesis
ST6GALNAC1	Mucin type O-glycan biosynthesis
WBSCR16	Mucin type O-glycan biosynthesis
WBSCR17	Mucin type O-glycan biosynthesis
B3GNT6	Mucin type O-glycan biosynthesis
ST3GAL1	Mucin type O-glycan biosynthesis
ST3GAL2	Mucin type O-glycan biosynthesis
ST6GAL1	N-Glycan biosynthesis
ST6GAL2	N-Glycan biosynthesis
ALG1	N-Glycan biosynthesis
ALG10	N-Glycan biosynthesis
ALG10B	N-Glycan biosynthesis
ALG11	N-Glycan biosynthesis
ALG12	N-Glycan biosynthesis
ALG13	N-Glycan biosynthesis
ALG14	N-Glycan biosynthesis
ALG2	N-Glycan biosynthesis
ALG3	N-Glycan biosynthesis
ALG5	N-Glycan biosynthesis
ALG6	N-Glycan biosynthesis
ALG8	N-Glycan biosynthesis
ALG9	N-Glycan biosynthesis
DAD1	N-Glycan biosynthesis
DDOST	N-Glycan biosynthesis
DOLK	N-Glycan biosynthesis
DOLPP1	N-Glycan biosynthesis
DPAGT1	N-Glycan biosynthesis
DPM1	N-Glycan biosynthesis
DPM3	N-Glycan biosynthesis
GANAB	N-Glycan biosynthesis
MAN1A1	N-Glycan biosynthesis
MAN1A2	N-Glycan biosynthesis
MAN1B1	N-Glycan biosynthesis
MAN1C1	N-Glycan biosynthesis
MAN2A1	N-Glycan biosynthesis
MAN2A2	N-Glycan biosynthesis
MGAT1	N-Glycan biosynthesis
MGAT2	N-Glycan biosynthesis
MGAT3	N-Glycan biosynthesis
MGAT4A	N-Glycan biosynthesis
MGAT4B	N-Glycan biosynthesis
MGAT4C	N-Glycan biosynthesis
MGAT4D	N-Glycan biosynthesis
MGAT5	N-Glycan biosynthesis
MOGS	N-Glycan biosynthesis
RPN1	N-Glycan biosynthesis
RPN2	N-Glycan biosynthesis
STT3A	N-Glycan biosynthesis
STT3B	N-Glycan biosynthesis
TUSC3	N-Glycan biosynthesis
FUT8	N-Glycan biosynthesis
DPM2	N-Glycan biosynthesis
MGAT5B	N-Glycan biosynthesis
B4GALT3	N-Glycan biosynthesis
B4GALT1	N-Glycan biosynthesis
B4GALT2	N-Glycan biosynthesis
ENPP1	Nicotinate and nicotinamide metabolism
ENPP3	Nicotinate and nicotinamide metabolism
NT5C	Nicotinate and nicotinamide metabolism
NT5C1A	Nicotinate and nicotinamide metabolism
NT5C1B	Nicotinate and nicotinamide metabolism
NT5C2	Nicotinate and nicotinamide metabolism
NT5C3	Nicotinate and nicotinamide metabolism
NT5C3L	Nicotinate and nicotinamide metabolism
NT5E	Nicotinate and nicotinamide metabolism
NT5M	Nicotinate and nicotinamide metabolism
PNP	Nicotinate and nicotinamide metabolism
ASPDH	Nicotinate and nicotinamide metabolism
BST1	Nicotinate and nicotinamide metabolism
C5orf33	Nicotinate and nicotinamide metabolism
C9orf95	Nicotinate and nicotinamide metabolism
CD38	Nicotinate and nicotinamide metabolism
ITGB1BP3	Nicotinate and nicotinamide metabolism
NADK	Nicotinate and nicotinamide metabolism
NADSYN1	Nicotinate and nicotinamide metabolism
NAMPT	Nicotinate and nicotinamide metabolism
NAPRT	Nicotinate and nicotinamide metabolism
NMNAT1	Nicotinate and nicotinamide metabolism
NMNAT2	Nicotinate and nicotinamide metabolism
NMNAT3	Nicotinate and nicotinamide metabolism
NNMT	Nicotinate and nicotinamide metabolism
NNT	Nicotinate and nicotinamide metabolism
NUDT12	Nicotinate and nicotinamide metabolism
QPRT	Nicotinate and nicotinamide metabolism
AOX1	Nicotinate and nicotinamide metabolism
CA1	Nitrogen metabolism
CA12	Nitrogen metabolism
CA13	Nitrogen metabolism
CA14	Nitrogen metabolism
CA2	Nitrogen metabolism
CA3	Nitrogen metabolism
CA4	Nitrogen metabolism
CA5A	Nitrogen metabolism
CA5B	Nitrogen metabolism
CA6	Nitrogen metabolism
CA7	Nitrogen metabolism
CA8	Nitrogen metabolism
CA9	Nitrogen metabolism
CPS1	Nitrogen metabolism
GLUD1	Nitrogen metabolism
GLUD2	Nitrogen metabolism
GLUL	Nitrogen metabolism
ATIC	One carbon pool by folate
GART	One carbon pool by folate
TYMS	One carbon pool by folate
ALDH1L1	One carbon pool by folate
ALDH1L2	One carbon pool by folate
MTFMT	One carbon pool by folate
MTHFD1	One carbon pool by folate
MTHFD1L	One carbon pool by folate
MTHFD2	One carbon pool by folate
MTHFD2L	One carbon pool by folate
MTHFR	One carbon pool by folate
MTHFS	One carbon pool by folate
MTR	One carbon pool by folate
DHFR	One carbon pool by folate
DHFRL1	One carbon pool by folate
FTCD	One carbon pool by folate
AMT	One carbon pool by folate
SHMT1	One carbon pool by folate
SHMT2	One carbon pool by folate
GBA	Other glycan degradation
GBA2	Other glycan degradation
NEU1	Other glycan degradation
NEU2	Other glycan degradation
NEU3	Other glycan degradation
NEU4	Other glycan degradation
AGA	Other glycan degradation
ENGASE	Other glycan degradation
FUCA1	Other glycan degradation
FUCA2	Other glycan degradation
HEXDC	Other glycan degradation
MAN2B1	Other glycan degradation
MAN2B2	Other glycan degradation
MAN2C1	Other glycan degradation
MANBA	Other glycan degradation
GLB1	Other glycan degradation
HEXA	Other glycan degradation
HEXB	Other glycan degradation
B3GALTL	Other types of O-glycan biosynthesis
C3orf64	Other types of O-glycan biosynthesis
GLT8D4	Other types of O-glycan biosynthesis
GXYLT1	Other types of O-glycan biosynthesis
KTELC1	Other types of O-glycan biosynthesis
LFNG	Other types of O-glycan biosynthesis
MFNG	Other types of O-glycan biosynthesis
OGT	Other types of O-glycan biosynthesis
POFUT1	Other types of O-glycan biosynthesis
POFUT2	Other types of O-glycan biosynthesis
RFNG	Other types of O-glycan biosynthesis
GLT25D1	Other types of O-glycan biosynthesis
GLT25D2	Other types of O-glycan biosynthesis
PLOD3	Other types of O-glycan biosynthesis
POMT1	Other types of O-glycan biosynthesis
POMT2	Other types of O-glycan biosynthesis
ST6GAL1	Other types of O-glycan biosynthesis
ST6GAL2	Other types of O-glycan biosynthesis
ST3GAL3	Other types of O-glycan biosynthesis
B4GALT3	Other types of O-glycan biosynthesis
B4GALT1	Other types of O-glycan biosynthesis
B4GALT2	Other types of O-glycan biosynthesis
COX10	Oxidative phosphorylation
COX15	Oxidative phosphorylation
SDHA	Oxidative phosphorylation
SDHB	Oxidative phosphorylation
SDHC	Oxidative phosphorylation
SDHD	Oxidative phosphorylation
ATP12A	Oxidative phosphorylation
ATP4A	Oxidative phosphorylation
ATP4B	Oxidative phosphorylation
ATP5A1	Oxidative phosphorylation
ATP5B	Oxidative phosphorylation
ATP5C1	Oxidative phosphorylation
ATP5D	Oxidative phosphorylation
ATP5E	Oxidative phosphorylation
ATP5F1	Oxidative phosphorylation
ATP5G1	Oxidative phosphorylation
ATP5G2	Oxidative phosphorylation
ATP5G3	Oxidative phosphorylation
ATP5H	Oxidative phosphorylation
ATP5I	Oxidative phosphorylation
ATP5J	Oxidative phosphorylation
ATP5J2	Oxidative phosphorylation
ATP5L	Oxidative phosphorylation
ATP5O	Oxidative phosphorylation
ATP6AP1	Oxidative phosphorylation
ATP6V0A1	Oxidative phosphorylation
ATP6V0A2	Oxidative phosphorylation
ATP6V0A4	Oxidative phosphorylation
ATP6V0B	Oxidative phosphorylation
ATP6V0C	Oxidative phosphorylation
ATP6V0D1	Oxidative phosphorylation
ATP6V0D2	Oxidative phosphorylation
ATP6V0E1	Oxidative phosphorylation
ATP6V0E2	Oxidative phosphorylation
ATP6V1A	Oxidative phosphorylation
ATP6V1B1	Oxidative phosphorylation
ATP6V1B2	Oxidative phosphorylation
ATP6V1C1	Oxidative phosphorylation
ATP6V1C2	Oxidative phosphorylation
ATP6V1D	Oxidative phosphorylation
ATP6V1E1	Oxidative phosphorylation
ATP6V1E2	Oxidative phosphorylation
ATP6V1F	Oxidative phosphorylation
ATP6V1G1	Oxidative phosphorylation
ATP6V1G2	Oxidative phosphorylation
ATP6V1G3	Oxidative phosphorylation
ATP6V1H	Oxidative phosphorylation
COX11	Oxidative phosphorylation
COX17	Oxidative phosphorylation
COX4I1	Oxidative phosphorylation
COX4I2	Oxidative phosphorylation
COX5A	Oxidative phosphorylation
COX5B	Oxidative phosphorylation
COX6A1	Oxidative phosphorylation
COX6A2	Oxidative phosphorylation
COX6B1	Oxidative phosphorylation
COX6B2	Oxidative phosphorylation
COX6C	Oxidative phosphorylation
COX7A1	Oxidative phosphorylation
COX7A2	Oxidative phosphorylation
COX7A2L	Oxidative phosphorylation
COX7B	Oxidative phosphorylation
COX7B2	Oxidative phosphorylation
COX7C	Oxidative phosphorylation
COX8A	Oxidative phosphorylation
COX8C	Oxidative phosphorylation
CYC1	Oxidative phosphorylation
LHPP	Oxidative phosphorylation
MT-ATP6	Oxidative phosphorylation
MT-ATP8	Oxidative phosphorylation
MT-CO1	Oxidative phosphorylation
MT-CO2	Oxidative phosphorylation
MT-CO3	Oxidative phosphorylation
MT-CYB	Oxidative phosphorylation
MT-ND1	Oxidative phosphorylation
MT-ND2	Oxidative phosphorylation
MT-ND3	Oxidative phosphorylation
MT-ND4	Oxidative phosphorylation
MT-ND4L	Oxidative phosphorylation
[truncated: 1,477 more rows]

## Sheet: Supplementary file 3f
Regulon	type
NFKB1	Transcription_factor
NFKB2	Transcription_factor
REL	Transcription_factor
RELA	Transcription_factor
RELB	Transcription_factor
STAT1	Transcription_factor
STAT2	Transcription_factor
STAT3	Transcription_factor
STAT4	Transcription_factor
STAT5A	Transcription_factor
STAT5B	Transcription_factor
STAT6	Transcription_factor
NFATC2	Transcription_factor
NFATC1	Transcription_factor
NFATC4	Transcription_factor
NFATC3	Transcription_factor
NFAT5	Transcription_factor
CREB1	Transcription_factor
JUN	Transcription_factor
JUNB	Transcription_factor
JUND	Transcription_factor
FOS	Transcription_factor
FOSB	Transcription_factor
FOSL1	Transcription_factor
FOSL2	Transcription_factor
SP1	Transcription_factor
FOXM1	Transcription_factor
TP53	Transcription_factor
FOXO3	Transcription_factor
RUNX3	Transcription_factor
KLF4	Transcription_factor
KAT2A	Chromatin_modifier
KAT2B	Chromatin_modifier
CREBBP	Chromatin_modifier
EP300	Chromatin_modifier
KAT6A	Chromatin_modifier
KAT6B	Chromatin_modifier
KAT5	Chromatin_modifier
KAT8	Chromatin_modifier
KMT2D	Chromatin_modifier
SETD7	Chromatin_modifier
PRDM2	Chromatin_modifier
SMYD2	Chromatin_modifier
DOT1L	Chromatin_modifier
PRMT1	Chromatin_modifier
PRMT2	Chromatin_modifier
PRMT3	Chromatin_modifier
CARM1	Chromatin_modifier
PRMT5	Chromatin_modifier
PRMT6	Chromatin_modifier
PRMT7	Chromatin_modifier
PRMT8	Chromatin_modifier
RNF2	Chromatin_modifier
UBE2J1	Chromatin_modifier
HDAC1	Chromatin_modifier
HDAC2	Chromatin_modifier
HDAC3	Chromatin_modifier
HDAC4	Chromatin_modifier
HDAC5	Chromatin_modifier
HDAC6	Chromatin_modifier
HDAC7	Chromatin_modifier
HDAC8	Chromatin_modifier
HDAC9	Chromatin_modifier
HDAC10	Chromatin_modifier
HDAC11	Chromatin_modifier
SIRT2	Chromatin_modifier
KDM1A	Chromatin_modifier
KDM2A	Chromatin_modifier
KDM5A	Chromatin_modifier
KDM5B	Chromatin_modifier
KDM5C	Chromatin_modifier
KDM5D	Chromatin_modifier
KDM6A	Chromatin_modifier
KDM6B	Chromatin_modifier
KDM2B	Chromatin_modifier
KDM4A	Chromatin_modifier
KDM4B	Chromatin_modifier
KDM4C	Chromatin_modifier
JMJD6	Chromatin_modifier
USP16	Chromatin_modifier
KAT7	Chromatin_modifier
NCOA1	Chromatin_modifier
NCOA3	Chromatin_modifier
CLOCK	Chromatin_modifier
CPB2	Chromatin_modifier
TAF1	Chromatin_modifier
PRDM14	Chromatin_modifier
SIRT1	Chromatin_modifier
SIRT3	Chromatin_modifier
SIRT4	Chromatin_modifier
SIRT5	Chromatin_modifier
SIRT6	Chromatin_modifier
SIRT7	Chromatin_modifier
SUV39H1	Chromatin_modifier
SUV39H2	Chromatin_modifier
EHMT2	Chromatin_modifier
SETDB2	Chromatin_modifier
KMT2A	Chromatin_modifier
KMT2B	Chromatin_modifier
KMT2C	Chromatin_modifier
KMT2E	Chromatin_modifier
SETD2	Chromatin_modifier
NSD1	Chromatin_modifier
SMYD3	Chromatin_modifier
WHSC1L1	Chromatin_modifier
WHSC1	Chromatin_modifier
SETD8	Chromatin_modifier
EZH2	Chromatin_modifier
KDM1B	Chromatin_modifier
KDM3A	Chromatin_modifier
KDM3B	Chromatin_modifier
KDM4D	Chromatin_modifier
KDM4E	Chromatin_modifier
KDM7A	Chromatin_modifier
KDM8	Chromatin_modifier

## Sheet: Supplementary file 3g
gene	class	classification system
ADTRP	Surface_crypt_like	Budinska classification
B3GNT7	Surface_crypt_like	Budinska classification
CLCA1	Surface_crypt_like	Budinska classification
MUC2	Surface_crypt_like	Budinska classification
NR3C2	Surface_crypt_like	Budinska classification
PADI2	Surface_crypt_like	Budinska classification
RETNLB	Surface_crypt_like	Budinska classification
STYK1	Surface_crypt_like	Budinska classification
CCDC113	Lower_crypt_like	Budinska classification
CDHR1	Lower_crypt_like	Budinska classification
FARP1	Lower_crypt_like	Budinska classification
GPSM2	Lower_crypt_like	Budinska classification
GRM8	Lower_crypt_like	Budinska classification
HNF4A	Lower_crypt_like	Budinska classification
IHH	Lower_crypt_like	Budinska classification
KCNK5	Lower_crypt_like	Budinska classification
KIAA0226L	Lower_crypt_like	Budinska classification
MYRIP	Lower_crypt_like	Budinska classification
PLAGL2	Lower_crypt_like	Budinska classification
PRR15	Lower_crypt_like	Budinska classification
QPRT	Lower_crypt_like	Budinska classification
RNF43	Lower_crypt_like	Budinska classification
RPS6KA3	Lower_crypt_like	Budinska classification
SLC5A6	Lower_crypt_like	Budinska classification
TP53RK	Lower_crypt_like	Budinska classification
TSPAN6	Lower_crypt_like	Budinska classification
VAV3	Lower_crypt_like	Budinska classification
YAE1D1	Lower_crypt_like	Budinska classification
ANP32E	CIMP_H_like	Budinska classification
EGLN3	CIMP_H_like	Budinska classification
IDO1	CIMP_H_like	Budinska classification
PLK2	CIMP_H_like	Budinska classification
RAB27B	CIMP_H_like	Budinska classification
RARRES3	CIMP_H_like	Budinska classification
RPL22L1	CIMP_H_like	Budinska classification
TFAP2A	CIMP_H_like	Budinska classification
ANK2	Mesenchymal	Budinska classification
BOC	Mesenchymal	Budinska classification
C7	Mesenchymal	Budinska classification
CRYAB	Mesenchymal	Budinska classification
DCHS1	Mesenchymal	Budinska classification
DDR2	Mesenchymal	Budinska classification
GEM	Mesenchymal	Budinska classification
PRICKLE1	Mesenchymal	Budinska classification
TAGLN	Mesenchymal	Budinska classification
CEACAM6	Mixed	Budinska classification
CXCL5	Mixed	Budinska classification
HSD11B1	Mixed	Budinska classification
IL1B	Mixed	Budinska classification
IL6	Mixed	Budinska classification
MRPS31	Mixed	Budinska classification
PI15	Mixed	Budinska classification
RAP2A	Mixed	Budinska classification
UQCC	Mixed	Budinska classification
KIAA0226L	CCS1	De Sousa classification
QPRT	CCS1	De Sousa classification
C10orf99	CCS1	De Sousa classification
PPP1R14C	CCS1	De Sousa classification
AXIN2	CCS1	De Sousa classification
PLAGL2	CCS1	De Sousa classification
RNF43	CCS1	De Sousa classification
FITM2	CCS1	De Sousa classification
ASCL2	CCS1	De Sousa classification
ATP10B	CCS1	De Sousa classification
VAV3	CCS1	De Sousa classification
CDHR1	CCS1	De Sousa classification
DDC	CCS1	De Sousa classification
AMACR	CCS1	De Sousa classification
PRDX5	CCS1	De Sousa classification
PPP1R14D	CCS1	De Sousa classification
PRR15	CCS1	De Sousa classification
TSPAN6	CCS1	De Sousa classification
SRSF6	CCS2	De Sousa classification
HNRNPL	CCS2	De Sousa classification
ZIC2	CCS2	De Sousa classification
EIF5A	CCS2	De Sousa classification
PSIP1	CCS2	De Sousa classification
NUTF2	CCS2	De Sousa classification
TRIM7	CCS2	De Sousa classification
PRPF39	CCS2	De Sousa classification
AMFR	CCS2	De Sousa classification
CASP2	CCS2	De Sousa classification
CYP1B1	CCS3	De Sousa classification
HTR2B	CCS3	De Sousa classification
GAS1	CCS3	De Sousa classification
ECM2	CCS3	De Sousa classification
KCNE4	CCS3	De Sousa classification
RGS4	CCS3	De Sousa classification
PDGFRL	CCS3	De Sousa classification
CFH	CCS3	De Sousa classification
STON1	CCS3	De Sousa classification
NAP1L3	CCS3	De Sousa classification
CCDC80	CCS3	De Sousa classification
ISM1	CCS3	De Sousa classification
PLN	CCS3	De Sousa classification
PCDH7	CCS3	De Sousa classification
MSRB3	CCS3	De Sousa classification
CXCL12	CCS3	De Sousa classification
ZFPM2	CCS3	De Sousa classification
VGLL3	CCS3	De Sousa classification
PTGIS	CCS3	De Sousa classification
COLEC12	CCS3	De Sousa classification
HSD17B6	CCS3	De Sousa classification
HSPA4L	A-type	Roepman classification
SLC7A11	A-type	Roepman classification
NUDT6	A-type	Roepman classification
ME1	A-type	Roepman classification
DLG7	A-type	Roepman classification
KNTC2	A-type	Roepman classification
PRC1	A-type	Roepman classification
ECHS1	A-type	Roepman classification
DEPDC1	A-type	Roepman classification
ACADSB	A-type	Roepman classification
EIF4A2	A-type	Roepman classification
MREG	A-type	Roepman classification
NIPA1	A-type	Roepman classification
TIAL1	A-type	Roepman classification
URM1	A-type	Roepman classification
BG114486	B-type	Roepman classification
THC2669157	B-type	Roepman classification
QPRT	B-type	Roepman classification
PLA2G12B	B-type	Roepman classification
VAV3	B-type	Roepman classification
PTPRO	B-type	Roepman classification
RNF43	B-type	Roepman classification
DDC	B-type	Roepman classification
AXIN2	B-type	Roepman classification
C13orf18	B-type	Roepman classification
TSPAN6	B-type	Roepman classification
GGH	B-type	Roepman classification
PLAGL2	B-type	Roepman classification
ACSL6	B-type	Roepman classification
RBP2	B-type	Roepman classification
VAPB	B-type	Roepman classification
HNRNPA1L2	B-type	Roepman classification
KIF3B	B-type	Roepman classification
ARFGEF2	B-type	Roepman classification
PIWIL2	B-type	Roepman classification
FANCF	B-type	Roepman classification
THC2644861	B-type	Roepman classification
MOCS3	B-type	Roepman classification
PIGU	B-type	Roepman classification
CEP250	B-type	Roepman classification
IFT52	B-type	Roepman classification
CXorf56	B-type	Roepman classification
COBLL1	B-type	Roepman classification
EPOR	B-type	Roepman classification
MAPRE2	B-type	Roepman classification
THBS2	C-type	Roepman classification
SPOCK1	C-type	Roepman classification
COL5A2	C-type	Roepman classification
FBLN1	C-type	Roepman classification
MGP	C-type	Roepman classification
MXRA8	C-type	Roepman classification
DCN	C-type	Roepman classification
AEBP1	C-type	Roepman classification
BASP1	C-type	Roepman classification
COL6A1	C-type	Roepman classification
COL1A2	C-type	Roepman classification
HTRA1	C-type	Roepman classification
LOXL1	C-type	Roepman classification
COL5A1	C-type	Roepman classification
FSTL1	C-type	Roepman classification
GPSM1	C-type	Roepman classification
VWF	C-type	Roepman classification
WISP1	C-type	Roepman classification
SLIT3	C-type	Roepman classification
MC1R	C-type	Roepman classification
LAMB2	C-type	Roepman classification
PCOLCE	C-type	Roepman classification
GPX7	C-type	Roepman classification
COX7A1	C-type	Roepman classification
FGFR1	C-type	Roepman classification
AK021531	C-type	Roepman classification
CALD1	C-type	Roepman classification
JAK3	C-type	Roepman classification
TRO	C-type	Roepman classification
TGFB3	C-type	Roepman classification
LOC338328	C-type	Roepman classification
ANKRD35	C-type	Roepman classification
KIAA1442	C-type	Roepman classification
THY1	C-type	Roepman classification
FES	C-type	Roepman classification
PGF	C-type	Roepman classification
MAP3K3	C-type	Roepman classification
GPSM3	C-type	Roepman classification
NPC2	C-type	Roepman classification
C14orf139	C-type	Roepman classification
THC2532155	C-type	Roepman classification
C1orf198	C-type	Roepman classification
FLT4	C-type	Roepman classification
SNRP70	C-type	Roepman classification
KIAA1602	C-type	Roepman classification
ASPM	C-type	Roepman classification
ORC6L	C-type	Roepman classification
ZNF367	C-type	Roepman classification
NIPSNAP1	C-type	Roepman classification
SPBC25	C-type	Roepman classification
DIAPH3	C-type	Roepman classification
SFRP2	Stem-like	Sadanandam classification
MGP	Stem-like	Sadanandam classification
COL10A1	Stem-like	Sadanandam classification
MSRB3	Stem-like	Sadanandam classification
CYP1B1	Stem-like	Sadanandam classification
FNDC1	Stem-like	Sadanandam classification
SFRP4	Stem-like	Sadanandam classification
GAS1	Stem-like	Sadanandam classification
CCDC80	Stem-like	Sadanandam classification
SPOCK1	Stem-like	Sadanandam classification
THBS2	Stem-like	Sadanandam classification
MFAP5	Stem-like	Sadanandam classification
ASPN	Stem-like	Sadanandam classification
TNS1	Stem-like	Sadanandam classification
TAGLN	Stem-like	Sadanandam classification
COMP	Stem-like	Sadanandam classification
NTM	Stem-like	Sadanandam classification
HOPX	Stem-like	Sadanandam classification
AEBP1	Stem-like	Sadanandam classification
FRMD6	Stem-like	Sadanandam classification
PLN	Stem-like	Sadanandam classification
FBN1	Stem-like	Sadanandam classification
COL11A1	Stem-like	Sadanandam classification
ANTXR1	Stem-like	Sadanandam classification
MIR100HG	Stem-like	Sadanandam classification
PCDH7	Stem-like	Sadanandam classification
DDR2	Stem-like	Sadanandam classification
MYL9	Stem-like	Sadanandam classification
FERMT2	Stem-like	Sadanandam classification
VCAN	Stem-like	Sadanandam classification
CDH11	Stem-like	Sadanandam classification
SYNPO2	Stem-like	Sadanandam classification
SULF1	Stem-like	Sadanandam classification
FAP	Stem-like	Sadanandam classification
COL3A1	Stem-like	Sadanandam classification
CTHRC1	Stem-like	Sadanandam classification
ADAM12	Stem-like	Sadanandam classification
COL1A2	Stem-like	Sadanandam classification
TIMP2	Stem-like	Sadanandam classification
PRRX1	Stem-like	Sadanandam classification
BGN	Stem-like	Sadanandam classification
GLT8D2	Stem-like	Sadanandam classification
DCN	Stem-like	Sadanandam classification
FABP4	Stem-like	Sadanandam classification
FBLN1	Stem-like	Sadanandam classification
EFEMP1	Stem-like	Sadanandam classification
VGLL3	Stem-like	Sadanandam classification
SPARC	Stem-like	Sadanandam classification
ITGBL1	Stem-like	Sadanandam classification
AKAP12	Stem-like	Sadanandam classification
INHBA	Stem-like	Sadanandam classification
COL5A2	Stem-like	Sadanandam classification
RAB31	Stem-like	Sadanandam classification
ISLR	Stem-like	Sadanandam classification
STON1	Stem-like	Sadanandam classification
NOX4	Stem-like	Sadanandam classification
LOX	Stem-like	Sadanandam classification
POSTN	Stem-like	Sadanandam classification
ECM2	Stem-like	Sadanandam classification
LHFP	Stem-like	Sadanandam classification
SERPINF1	Stem-like	Sadanandam classification
NNMT	Stem-like	Sadanandam classification
PTGIS	Stem-like	Sadanandam classification
MYLK	Stem-like	Sadanandam classification
MAP1B	Stem-like	Sadanandam classification
CALD1	Stem-like	Sadanandam classification
GREM1	Stem-like	Sadanandam classification
COL5A1	Stem-like	Sadanandam classification
CNN1	Stem-like	Sadanandam classification
TIMP3	Stem-like	Sadanandam classification
COL6A2	Stem-like	Sadanandam classification
ZEB1	Stem-like	Sadanandam classification
PPAPDC1A	Stem-like	Sadanandam classification
OLFML2B	Stem-like	Sadanandam classification
HTRA1	Stem-like	Sadanandam classification
CXCL12	Stem-like	Sadanandam classification
DPYSL3	Stem-like	Sadanandam classification
PDGFC	Stem-like	Sadanandam classification
COL6A3	Stem-like	Sadanandam classification
COL1A1	Stem-like	Sadanandam classification
MYH11	Stem-like	Sadanandam classification
AOC3	Stem-like	Sadanandam classification
SPARCL1	Stem-like	Sadanandam classification
COL12A1	Stem-like	Sadanandam classification
PHLDB2	Stem-like	Sadanandam classification
TPM2	Stem-like	Sadanandam classification
TGFB1I1	Stem-like	Sadanandam classification
MITF	Stem-like	Sadanandam classification
GPC6	Stem-like	Sadanandam classification
NEXN	Stem-like	Sadanandam classification
MMP2	Stem-like	Sadanandam classification
ADAMTS2	Stem-like	Sadanandam classification
FIBIN	Stem-like	Sadanandam classification
TMEM47	Stem-like	Sadanandam classification
IGFBP5	Stem-like	Sadanandam classification
MXRA5	Stem-like	Sadanandam classification
EPYC	Stem-like	Sadanandam classification
COL15A1	Stem-like	Sadanandam classification
LMOD1	Stem-like	Sadanandam classification
FN1	Stem-like	Sadanandam classification
DPT	Stem-like	Sadanandam classification
TWIST1	Stem-like	Sadanandam classification
SDC2	Stem-like	Sadanandam classification
FLRT2	Stem-like	Sadanandam classification
LOXL1	Stem-like	Sadanandam classification
FHL1	Stem-like	Sadanandam classification
MAB21L2	Stem-like	Sadanandam classification
SSPN	Stem-like	Sadanandam classification
CTSK	Stem-like	Sadanandam classification
WWTR1	Stem-like	Sadanandam classification
CYBRD1	Stem-like	Sadanandam classification
CLIP4	Stem-like	Sadanandam classification
ZEB2	Stem-like	Sadanandam classification
SYNM	Stem-like	Sadanandam classification
SNAI2	Stem-like	Sadanandam classification
DES	Stem-like	Sadanandam classification
IGF1	Stem-like	Sadanandam classification
TNC	Stem-like	Sadanandam classification
GUCY1A3	Stem-like	Sadanandam classification
GULP1	Stem-like	Sadanandam classification
TMEM45A	Stem-like	Sadanandam classification
C3	Stem-like	Sadanandam classification
VCAM1	Stem-like	Sadanandam classification
AHNAK2	Stem-like	Sadanandam classification
ACTG2	Stem-like	Sadanandam classification
SRPX2	TA	Sadanandam classification
EPDR1	TA	Sadanandam classification
LY6G6D	TA	Sadanandam classification
EREG	TA	Sadanandam classification
CEL	TA	Sadanandam classification
KRT23	TA	Sadanandam classification
ACSL6	TA	Sadanandam classification
QPRT	TA	Sadanandam classification
AXIN2	TA	Sadanandam classification
ABAT	TA	Sadanandam classification
FARP1	TA	Sadanandam classification
CELP	TA	Sadanandam classification
C13orf18	TA	Sadanandam classification
HUNK	TA	Sadanandam classification
PLCB4	TA	Sadanandam classification
APCDD1	TA	Sadanandam classification
RNF43	TA	Sadanandam classification
ASCL2	TA	Sadanandam classification
CHN2	TA	Sadanandam classification
AREG	TA	Sadanandam classification
PAH	TA	Sadanandam classification
NR1I2	TA	Sadanandam classification
FREM2	TA	Sadanandam classification
CTTNBP2	TA	Sadanandam classification
GNG4	TA	Sadanandam classification
PRR15	TA	Sadanandam classification
LOC100288092	TA	Sadanandam classification
CFTR	TA	Sadanandam classification
BCL11A	TA	Sadanandam classification
ERP27	TA	Sadanandam classification
PLA2G12B	TA	Sadanandam classification
DACH1	TA	Sadanandam classification
SPIN3	TA	Sadanandam classification
GGH	TA	Sadanandam classification
ACE2	TA	Sadanandam classification
PTPRO	TA	Sadanandam classification
DPEP1	TA	Sadanandam classification
PROX1	TA	Sadanandam classification
ZNRF3	TA	Sadanandam classification
CAB39L	TA	Sadanandam classification
LRRC2	TA	Sadanandam classification
REEP1	TA	Sadanandam classification
GRM8	TA	Sadanandam classification
VAV3	TA	Sadanandam classification
CACNA1D	TA	Sadanandam classification
SGK2	TA	Sadanandam classification
ANKRD43	TA	Sadanandam classification
DDC	TA	Sadanandam classification
A1CF	TA	Sadanandam classification
MYRIP	TA	Sadanandam classification
CDKN2B	Enterocyte	Sadanandam classification
MUC12	Enterocyte	Sadanandam classification
TRPM6	Enterocyte	Sadanandam classification
PCK1	Enterocyte	Sadanandam classification
EDN3	Enterocyte	Sadanandam classification
SEMA6D	Enterocyte	Sadanandam classification
SCARA5	Enterocyte	Sadanandam classification
METTL7A	Enterocyte	Sadanandam classification
HPGD	Enterocyte	Sadanandam classification
CPM	Enterocyte	Sadanandam classification
IGJ	Enterocyte	Sadanandam classification
MT1M	Enterocyte	Sadanandam classification
FAM55D	Enterocyte	Sadanandam classification
MFSD4	Enterocyte	Sadanandam classification
UGT2A3	Enterocyte	Sadanandam classification
CLDN8	Enterocyte	Sadanandam classification
CD177	Enterocyte	Sadanandam classification
TMEM37	Enterocyte	Sadanandam classification
UGT2B17	Enterocyte	Sadanandam classification
LOC646627	Enterocyte	Sadanandam classification
CHP2	Enterocyte	Sadanandam classification
PYY	Enterocyte	Sadanandam classification
B3GNT7	Enterocyte	Sadanandam classification
AQP8	Enterocyte	Sadanandam classification
GCG	Enterocyte	Sadanandam classification
PBLD	Enterocyte	Sadanandam classification
CA1	Enterocyte	Sadanandam classification
SPINK5	Enterocyte	Sadanandam classification
SI	Enterocyte	Sadanandam classification
PKIB	Enterocyte	Sadanandam classification
DHRS9	Enterocyte	Sadanandam classification
FAM55A	Enterocyte	Sadanandam classification
ADH1C	Enterocyte	Sadanandam classification
CDHR5	Enterocyte	Sadanandam classification
MS4A12	Enterocyte	Sadanandam classification
AKR1B10	Enterocyte	Sadanandam classification
LRRC19	Enterocyte	Sadanandam classification
CA4	Enterocyte	Sadanandam classification
CA2	Enterocyte	Sadanandam classification
HSD17B2	Enterocyte	Sadanandam classification
PLAC8	Enterocyte	Sadanandam classification
ZG16	Enterocyte	Sadanandam classification
CEACAM7	Enterocyte	Sadanandam classification
C6orf105	Enterocyte	Sadanandam classification
SLC4A4	Enterocyte	Sadanandam classification
CLCA4	Enterocyte	Sadanandam classification
CCL28	Enterocyte	Sadanandam classification
PCCA	Goblet-like	Sadanandam classification
SMAD9	Goblet-like	Sadanandam classification
SLAIN1	Goblet-like	Sadanandam classification
C8orf84	Goblet-like	Sadanandam classification
EPHA4	Goblet-like	Sadanandam classification
HSPA2	Goblet-like	Sadanandam classification
CPS1	Goblet-like	Sadanandam classification
TOX	Goblet-like	Sadanandam classification
MLPH	Goblet-like	Sadanandam classification
PCSK1	Goblet-like	Sadanandam classification
TCN1	Goblet-like	Sadanandam classification
SERPINA1	Goblet-like	Sadanandam classification
DEFA5	Goblet-like	Sadanandam classification
SLITRK6	Goblet-like	Sadanandam classification
RETNLB	Goblet-like	Sadanandam classification
AQP3	Goblet-like	Sadanandam classification
REG3A	Goblet-like	Sadanandam classification
L1TD1	Goblet-like	Sadanandam classification
NCRNA00261	Goblet-like	Sadanandam classification
MUC5B	Goblet-like	Sadanandam classification
TFF1	Goblet-like	Sadanandam classification
KIAA1324	Goblet-like	Sadanandam classification
NCF2	Inflammatory	Sadanandam classification
FCER1G	Inflammatory	Sadanandam classification
TNFSF13B	Inflammatory	Sadanandam classification
ITGB2	Inflammatory	Sadanandam classification
SLAMF8	Inflammatory	Sadanandam classification
C1QC	Inflammatory	Sadanandam classification
BCL2A1	Inflammatory	Sadanandam classification
AIM2	Inflammatory	Sadanandam classification
RPL22L1	Inflammatory	Sadanandam classification
STAT1	Inflammatory	Sadanandam classification
ISG15	Inflammatory	Sadanandam classification
GBP4	Inflammatory	Sadanandam classification
LCK	Inflammatory	Sadanandam classification
GBP5	Inflammatory	Sadanandam classification
APOBEC3G	Inflammatory	Sadanandam classification
IFI44	Inflammatory	Sadanandam classification
FAM26F	Inflammatory	Sadanandam classification
CXCL11	Inflammatory	Sadanandam classification
CCL4	Inflammatory	Sadanandam classification
CXCL9	Inflammatory	Sadanandam classification
HOXC6	Inflammatory	Sadanandam classification
BST2	Inflammatory	Sadanandam classification
HLA-DMB	Inflammatory	Sadanandam classification
SLAMF7	Inflammatory	Sadanandam classification
IFIT3	Inflammatory	Sadanandam classification
GBP1	Inflammatory	Sadanandam classification
CXCL10	Inflammatory	Sadanandam classification
CD74	Inflammatory	Sadanandam classification
BIRC3	Inflammatory	Sadanandam classification
CCL8	Inflammatory	Sadanandam classification
CCL5	Inflammatory	Sadanandam classification
HLA-DPA1	Inflammatory	Sadanandam classification
HLA-DMA	Inflammatory	Sadanandam classification
KYNU	Inflammatory	Sadanandam classification
C1QA	Inflammatory	Sadanandam classification
HLA-DPB1	Inflammatory	Sadanandam classification
LCP2	Inflammatory	Sadanandam classification
C1QB	Inflammatory	Sadanandam classification
CD53	Inflammatory	Sadanandam classification
SAMSN1	Inflammatory	Sadanandam classification
HLA-DRA	Inflammatory	Sadanandam classification
PTPRC	Inflammatory	Sadanandam classification
SAMD9L	Inflammatory	Sadanandam classification
RARRES3	Inflammatory	Sadanandam classification
CXCL13	Inflammatory	Sadanandam classification
IDO1	Inflammatory	Sadanandam classification
PSMB9	Inflammatory	Sadanandam classification
GZMA	Inflammatory	Sadanandam classification
ZIC2	Inflammatory	Sadanandam classification
GNLY	Inflammatory	Sadanandam classification
HSPA4L	Inflammatory	Sadanandam classification
GPR126	Inflammatory	Sadanandam classification
SRSF6	Inflammatory	Sadanandam classification

## Sheet: Supplementary file 3h
Dataset	Source	Data accession	Platform	Normalisation	Available treament data	Treament type	Available PFS/DFS data	Available OS data	RAS mutation/wild	Available treament response data
GSE14333	PMID: 19996206	https://www.ncbi.nlm.nih.gov/geo/query/acc.cgi?acc=GSE14333	Affymetrix Human Genome U133 Plus 2.0 Array	RMA	157	5-fluorouracil (5-FU)-based chemotherapy	126 DFS	-	-	-
GSE39582	PMID: 23700391	https://www.ncbi.nlm.nih.gov/geo/query/acc.cgi?acc=GSE39582	Affymetrix Human Genome U133 Plus 2.0 Array	RMA	549	5-fluorouracil (5-FU)-based chemotherapy	545 DFS	547	-	-
GSE103479	PMID: 30088816	https://www.ncbi.nlm.nih.gov/geo/query/acc.cgi?acc=GSE103479	Almac Diagnostics Custom Xcel array	RMA	155	5-fluorouracil (5-FU)-based chemotherapy	154	154	-	-
GSE104645	PMID: 29721154	https://www.ncbi.nlm.nih.gov/geo/query/acc.cgi?acc=GSE104645	Agilent-014850 Whole Human Genome Microarray 4x44K G4112F	Data was normalized by the percentile shift (all samples were normalized to the signal value of 75th percentile of all of probes on the microarray) and the scaling (all genes were normalized to the median of all samples).	193	5-fluorouracil (5-FU)-based chemotherapy, a combination of chemotherapy and bevacizumab, or anti-EGFR therapies	PFS_after_EGFR: 138	OS_after_EGFR: 140	67/94	Response to chemotherapy: 79; Response to a combination of chemotherapy and bevacizumab: 83; Response to anti-EGFR: 91
Gide	PMID: 30753825	https://www.ncbi.nlm.nih.gov/bioproject/PRJEB23709	RNA-Seq	log2tpm	41	anti-PD1	41 PFS	41	-	41
Hugo	PMID: 26997480	https://www.ncbi.nlm.nih.gov/geo/query/acc.cgi?acc=GSE78220	RNA-Seq	log2tpm	27	anti-PD1	-	27	-	27
Jung	PMID: 31537801	https://www.ncbi.nlm.nih.gov/geo/query/acc.cgi?acc=GSE135222	RNA-Seq	log2tpm	27	anti-PD-1/PD-L1	-	27	-
IMvigor210	PMID: 29443960	http://research-pub.gene.com/IMvigor210CoreBiologies/#transcriptome-wide-gene-expression-data	RNA-Seq	log2tpm	348	anti-PDL1	-	348	-	298
Note: OS: overall survival; DFS: progression-free survival; PFS: progression-free survival.
